# Supplementary material for: ROQUIN-1 binding to the transcriptome of T cells reveals conserved targets in the control of lymphopoiesis
Source: Research Square preprint supplement (doi:10.21203/rs.3.rs-6931797/v1), 2025-07-15
Supplement: Supplementary file 1 [file 3f45e2c6e50ef38dcc63d872.xlsx]

## Sheet: 00_README
	Supplementary Table – Roquin binding sites and orthologies : README This sheet describes the content of the other sheets, providing with both a brief description of the sheet and its columns. NOTE: genomic annotations are derived from GENCODE V40 / GENCODE VM25. - 01_human_peaks_bed: BED6 formatted table of ALL the peaks on main chromosomes of human genome Hg38. The <name> columns (4th) contains …

## Sheet: 01_human_peaks_bed
chr1	1211398	1211407	three_prime_UTR;TNFRSF4;protein_coding;ENSG00000186827.11	281.429	-
chr1	1211415	1211424	three_prime_UTR;TNFRSF4;protein_coding;ENSG00000186827.11	231.775	-
chr1	1211431	1211440	three_prime_UTR;TNFRSF4;protein_coding;ENSG00000186827.11	206.708	-
chr1	1211494	1211503	three_prime_UTR;TNFRSF4;protein_coding;ENSG00000186827.11	592.212	-
chr1	1386759	1386768	three_prime_UTR;CCNL2;protein_coding;ENSG00000221978.13	15.0327	-
chr1	1386778	1386787	three_prime_UTR;CCNL2;protein_coding;ENSG00000221978.13	142.49	-
chr1	1386788	1386797	three_prime_UTR;CCNL2;protein_coding;ENSG00000221978.13	554.485	-
chr1	1386857	1386866	three_prime_UTR;CCNL2;protein_coding;ENSG00000221978.13	739.613	-
chr1	1386891	1386900	three_prime_UTR;CCNL2;protein_coding;ENSG00000221978.13	10.6267	-
chr1	1785380	1785389	three_prime_UTR;GNB1;protein_coding;ENSG00000078369.18	23.9825	-
chr1	1785391	1785400	three_prime_UTR;GNB1;protein_coding;ENSG00000078369.18	5.70286	-
chr1	1786041	1786050	three_prime_UTR;GNB1;protein_coding;ENSG00000078369.18	11.9611	-
chr1	2307722	2307731	three_prime_UTR;SKI;protein_coding;ENSG00000157933.10	51.5927	+
chr1	2307748	2307757	three_prime_UTR;SKI;protein_coding;ENSG00000157933.10	29.3606	+
chr1	2307759	2307768	three_prime_UTR;SKI;protein_coding;ENSG00000157933.10	16.4713	+
chr1	2307794	2307803	three_prime_UTR;SKI;protein_coding;ENSG00000157933.10	28.23	+
chr1	2307895	2307904	three_prime_UTR;SKI;protein_coding;ENSG00000157933.10	8.1355	+
chr1	2307954	2307963	three_prime_UTR;SKI;protein_coding;ENSG00000157933.10	69.2408	+
chr1	2308045	2308054	three_prime_UTR;SKI;protein_coding;ENSG00000157933.10	10.5318	+
chr1	2308062	2308071	three_prime_UTR;SKI;protein_coding;ENSG00000157933.10	2.02655	+
chr1	2308454	2308463	three_prime_UTR;SKI;protein_coding;ENSG00000157933.10	119.853	+
chr1	2308477	2308486	three_prime_UTR;SKI;protein_coding;ENSG00000157933.10	7.25201	+
chr1	2309398	2309407	three_prime_UTR;SKI;protein_coding;ENSG00000157933.10	4.63781	+
chr1	2309434	2309443	three_prime_UTR;SKI;protein_coding;ENSG00000157933.10	24.4762	+
chr1	2309459	2309468	three_prime_UTR;SKI;protein_coding;ENSG00000157933.10	102.794	+
chr1	2309472	2309481	three_prime_UTR;SKI;protein_coding;ENSG00000157933.10	20.1511	+
chr1	2309502	2309511	three_prime_UTR;SKI;protein_coding;ENSG00000157933.10	10.1682	+
chr1	2309972	2309981	three_prime_UTR;SKI;protein_coding;ENSG00000157933.10	83.1693	+
chr1	2309996	2310005	three_prime_UTR;SKI;protein_coding;ENSG00000157933.10	18.0215	+
chr1	2310008	2310017	three_prime_UTR;SKI;protein_coding;ENSG00000157933.10	33.1675	+
chr1	2310018	2310027	three_prime_UTR;SKI;protein_coding;ENSG00000157933.10	15.6224	+
chr1	2403244	2403253	three_prime_UTR;RER1;protein_coding;ENSG00000157916.20	19.6358	+
chr1	2403668	2403677	three_prime_UTR;RER1;protein_coding;ENSG00000157916.20	10.0134	+
chr1	2403705	2403714	three_prime_UTR;RER1;protein_coding;ENSG00000157916.20	22.9053	+
chr1	3889211	3889220	three_prime_UTR;C1orf174;protein_coding;ENSG00000198912.12	64.6777	-
chr1	3889224	3889233	three_prime_UTR;C1orf174;protein_coding;ENSG00000198912.12	4.58238	-
chr1	3889247	3889256	three_prime_UTR;C1orf174;protein_coding;ENSG00000198912.12	7.8336	-
chr1	3889260	3889269	three_prime_UTR;C1orf174;protein_coding;ENSG00000198912.12	160.431	-
chr1	3889275	3889284	three_prime_UTR;C1orf174;protein_coding;ENSG00000198912.12	37.5512	-
chr1	6100948	6100957	three_prime_UTR;KCNAB2;protein_coding;ENSG00000069424.16	6.10613	+
chr1	6100991	6101000	three_prime_UTR;KCNAB2;protein_coding;ENSG00000069424.16	40.4305	+
chr1	6101071	6101080	three_prime_UTR;KCNAB2;protein_coding;ENSG00000069424.16	16.1591	+
chr1	6199562	6199571	CDS;RPL22;protein_coding;ENSG00000116251.11	11.3708	-
chr1	6461338	6461347	three_prime_UTR;TNFRSF25;protein_coding;ENSG00000215788.11	157.975	-
chr1	6461369	6461378	three_prime_UTR;TNFRSF25;protein_coding;ENSG00000215788.11	87.4799	-
chr1	6461383	6461392	three_prime_UTR;TNFRSF25;protein_coding;ENSG00000215788.11	118.313	-
chr1	6593201	6593210	three_prime_UTR;KLHL21;protein_coding;ENSG00000162413.17	14.1391	-
chr1	6593217	6593226	three_prime_UTR;KLHL21;protein_coding;ENSG00000162413.17	116.423	-
chr1	6623843	6623852	three_prime_UTR;PHF13;protein_coding;ENSG00000116273.6	171.629	+
chr1	6623861	6623870	three_prime_UTR;PHF13;protein_coding;ENSG00000116273.6	29.7914	+
chr1	6623921	6623930	three_prime_UTR;PHF13;protein_coding;ENSG00000116273.6	144.071	+
chr1	6623941	6623950	three_prime_UTR;PHF13;protein_coding;ENSG00000116273.6	22.5843	+
chr1	7773008	7773017	five_prime_UTR;VAMP3;protein_coding;ENSG00000049245.13	186.63	+
chr1	7985058	7985067	three_prime_UTR;PARK7;protein_coding;ENSG00000116288.13	113.913	+
chr1	7985069	7985078	three_prime_UTR;PARK7;protein_coding;ENSG00000116288.13	8.59349	+
chr1	7985144	7985153	three_prime_UTR;PARK7;protein_coding;ENSG00000116288.13	22.8842	+
chr1	7985205	7985214	three_prime_UTR;PARK7;protein_coding;ENSG00000116288.13	2.69208	+
chr1	8352452	8352461	three_prime_UTR;RERE;protein_coding;ENSG00000142599.19	2.79248	-
chr1	8352602	8352611	three_prime_UTR;RERE;protein_coding;ENSG00000142599.19	2.83616	-
chr1	8353111	8353120	three_prime_UTR;RERE;protein_coding;ENSG00000142599.19	78.6301	-
chr1	8353187	8353196	three_prime_UTR;RERE;protein_coding;ENSG00000142599.19	12.7211	-
chr1	8354491	8354500	three_prime_UTR;RERE;protein_coding;ENSG00000142599.19	32.398	-
chr1	8354520	8354529	three_prime_UTR;RERE;protein_coding;ENSG00000142599.19	30.104	-
chr1	8870495	8870504	CDS;ENO1;protein_coding;ENSG00000074800.16	17.9568	-
chr1	8871909	8871918	five_prime_UTR;ENO1;protein_coding;ENSG00000074800.16	44.3717	-
chr1	8871937	8871946	five_prime_UTR;ENO1;protein_coding;ENSG00000074800.16	23.2468	-
chr1	8871957	8871966	five_prime_UTR;ENO1;protein_coding;ENSG00000074800.16	12.7761	-
chr1	8871976	8871985	five_prime_UTR;ENO1;protein_coding;ENSG00000074800.16	41.0759	-
chr1	8874823	8874832	five_prime_UTR;ENO1;protein_coding;ENSG00000074800.16	11.7535	-
chr1	8874833	8874842	five_prime_UTR;ENO1;protein_coding;ENSG00000074800.16	45.9775	-
chr1	8874869	8874878	five_prime_UTR;ENO1;protein_coding;ENSG00000074800.16	35.5018	-
chr1	8874909	8874918	five_prime_UTR;ENO1;protein_coding;ENSG00000074800.16	20.0925	-
chr1	9582668	9582677	three_prime_UTR;SLC25A33;protein_coding;ENSG00000171612.7	169.761	+
chr1	9582700	9582709	three_prime_UTR;SLC25A33;protein_coding;ENSG00000171612.7	23.5111	+
chr1	9729973	9729982	three_prime_UTR;CLSTN1;protein_coding;ENSG00000171603.18	8.08731	-
chr1	9730012	9730021	three_prime_UTR;CLSTN1;protein_coding;ENSG00000171603.18	41.6563	-
chr1	9730022	9730031	three_prime_UTR;CLSTN1;protein_coding;ENSG00000171603.18	4.16329	-
chr1	9730058	9730067	three_prime_UTR;CLSTN1;protein_coding;ENSG00000171603.18	12.8062	-
chr1	9730081	9730090	three_prime_UTR;CLSTN1;protein_coding;ENSG00000171603.18	38.7957	-
chr1	10521145	10521154	intron;PEX14;protein_coding;ENSG00000142655.13	20.1867	+
chr1	10521159	10521168	intron;PEX14;protein_coding;ENSG00000142655.13	0.983381	+
chr1	10521208	10521217	intron;PEX14;protein_coding;ENSG00000142655.13	34.9791	+
chr1	10521236	10521245	intron;PEX14;protein_coding;ENSG00000142655.13	1.14407	+
chr1	10521264	10521273	intron;PEX14;protein_coding;ENSG00000142655.13	20.5443	+
chr1	10521283	10521292	intron;PEX14;protein_coding;ENSG00000142655.13	4.61018	+
chr1	11023126	11023135	three_prime_UTR;TARDBP;protein_coding;ENSG00000120948.19	70.2523	+
chr1	11023136	11023145	three_prime_UTR;TARDBP;protein_coding;ENSG00000120948.19	9.15849	+
chr1	11023370	11023379	three_prime_UTR;TARDBP;protein_coding;ENSG00000120948.19	13.5946	+
chr1	12172217	12172226	intron;TNFRSF1B;protein_coding;ENSG00000028137.19	21.7143	+
chr1	12174073	12174082	intron;TNFRSF1B;protein_coding;ENSG00000028137.19	4.22646	+
chr1	12174089	12174098	intron;TNFRSF1B;protein_coding;ENSG00000028137.19	27.1273	+
chr1	12174181	12174190	intron;TNFRSF1B;protein_coding;ENSG00000028137.19	6.83161	+
chr1	12174225	12174234	intron;TNFRSF1B;protein_coding;ENSG00000028137.19	9.24173	+
chr1	12174262	12174271	intron;TNFRSF1B;protein_coding;ENSG00000028137.19	15.436	+
chr1	12175080	12175089	intron;TNFRSF1B;protein_coding;ENSG00000028137.19	10.9045	+
chr1	12175097	12175106	intron;TNFRSF1B;protein_coding;ENSG00000028137.19	9.59313	+
chr1	12182565	12182574	intron;TNFRSF1B;protein_coding;ENSG00000028137.19	71.5612	+
chr1	12182577	12182586	intron;TNFRSF1B;protein_coding;ENSG00000028137.19	183.758	+
chr1	12182592	12182601	intron;TNFRSF1B;protein_coding;ENSG00000028137.19	19.9861	+
chr1	12182961	12182970	intron;TNFRSF1B;protein_coding;ENSG00000028137.19	1.06439	+
chr1	12182986	12182995	intron;TNFRSF1B;protein_coding;ENSG00000028137.19	7.05302	+
chr1	12183009	12183018	intron;TNFRSF1B;protein_coding;ENSG00000028137.19	7.1401	+
chr1	12183477	12183486	intron;TNFRSF1B;protein_coding;ENSG00000028137.19	77.2359	+
chr1	12183492	12183501	intron;TNFRSF1B;protein_coding;ENSG00000028137.19	13.6354	+
chr1	12183518	12183527	intron;TNFRSF1B;protein_coding;ENSG00000028137.19	24.5466	+
chr1	12183590	12183599	intron;TNFRSF1B;protein_coding;ENSG00000028137.19	3.07558	+
chr1	12183771	12183780	intron;TNFRSF1B;protein_coding;ENSG00000028137.19	11.8006	+
chr1	12183781	12183790	intron;TNFRSF1B;protein_coding;ENSG00000028137.19	2.00517	+
chr1	12183811	12183820	intron;TNFRSF1B;protein_coding;ENSG00000028137.19	11.1794	+
chr1	12207382	12207391	three_prime_UTR;TNFRSF1B;protein_coding;ENSG00000028137.19	208.247	+
chr1	12208437	12208446	three_prime_UTR;TNFRSF1B;protein_coding;ENSG00000028137.19	15.3032	+
chr1	12208448	12208457	three_prime_UTR;TNFRSF1B;protein_coding;ENSG00000028137.19	11.8834	+
chr1	13780850	13780859	CDS;PRDM2;protein_coding;ENSG00000116731.23	7.49956	+
chr1	13780922	13780931	CDS;PRDM2;protein_coding;ENSG00000116731.23	9.86593	+
chr1	13780956	13780965	CDS;PRDM2;protein_coding;ENSG00000116731.23	10.1225	+
chr1	13780980	13780989	CDS;PRDM2;protein_coding;ENSG00000116731.23	45.4385	+
chr1	13787128	13787137	three_prime_UTR;PRDM2;protein_coding;ENSG00000116731.23	187.163	+
chr1	13787541	13787550	three_prime_UTR;PRDM2;protein_coding;ENSG00000116731.23	19.7808	+
chr1	13787575	13787584	three_prime_UTR;PRDM2;protein_coding;ENSG00000116731.23	21.9797	+
chr1	15430077	15430086	three_prime_UTR;EFHD2;protein_coding;ENSG00000142634.13	51.0617	+
chr1	15430087	15430096	three_prime_UTR;EFHD2;protein_coding;ENSG00000142634.13	0.79381	+
chr1	15568731	15568740	three_prime_UTR;DNAJC16;protein_coding;ENSG00000116138.13	241.378	+
chr1	15876237	15876246	CDS;SPEN;protein_coding;ENSG00000065526.12	63.8822	+
chr1	15876325	15876334	CDS;SPEN;protein_coding;ENSG00000065526.12	12.6247	+
chr1	15876339	15876348	CDS;SPEN;protein_coding;ENSG00000065526.12	10.5885	+
chr1	15939693	15939702	three_prime_UTR;SPEN;protein_coding;ENSG00000065526.12	21.8689	+
chr1	15939728	15939737	three_prime_UTR;SPEN;protein_coding;ENSG00000065526.12	82.7757	+
chr1	15939762	15939771	three_prime_UTR;SPEN;protein_coding;ENSG00000065526.12	3.15836	+
chr1	15939827	15939836	three_prime_UTR;SPEN;protein_coding;ENSG00000065526.12	2.70105	+
chr1	15940020	15940029	three_prime_UTR;SPEN;protein_coding;ENSG00000065526.12	13.9683	+
chr1	15940063	15940072	three_prime_UTR;SPEN;protein_coding;ENSG00000065526.12	11.7294	+
chr1	16459333	16459342	three_prime_UTR;NECAP2;protein_coding;ENSG00000157191.20	14.3947	+
chr1	16459358	16459367	three_prime_UTR;NECAP2;protein_coding;ENSG00000157191.20	173.907	+
chr1	16872586	16872595	intron;CROCC;protein_coding;ENSG00000058453.17	107.6	+
chr1	16872596	16872605	intron;CROCC;protein_coding;ENSG00000058453.17	9.44846	+
chr1	16872611	16872620	intron;CROCC;protein_coding;ENSG00000058453.17	196.629	+
chr1	16889708	16889717	intron;CROCC;protein_coding;ENSG00000058453.17	272.446	+
chr1	17024016	17024025	CDS;SDHB;protein_coding;ENSG00000117118.10	10.7891	-
chr1	18904320	18904329	three_prime_UTR;IFFO2;protein_coding;ENSG00000169991.11	7.06905	-
chr1	18904335	18904344	three_prime_UTR;IFFO2;protein_coding;ENSG00000169991.11	37.0206	-
chr1	18904388	18904397	three_prime_UTR;IFFO2;protein_coding;ENSG00000169991.11	12.1375	-
chr1	18904400	18904409	three_prime_UTR;IFFO2;protein_coding;ENSG00000169991.11	124.909	-
chr1	18905322	18905331	three_prime_UTR;IFFO2;protein_coding;ENSG00000169991.11	14.1933	-
chr1	18905399	18905408	three_prime_UTR;IFFO2;protein_coding;ENSG00000169991.11	19.8116	-
chr1	18905420	18905429	three_prime_UTR;IFFO2;protein_coding;ENSG00000169991.11	51.1049	-
chr1	18905448	18905457	three_prime_UTR;IFFO2;protein_coding;ENSG00000169991.11	2.97626	-
chr1	18905484	18905493	three_prime_UTR;IFFO2;protein_coding;ENSG00000169991.11	213.774	-
chr1	18905837	18905846	three_prime_UTR;IFFO2;protein_coding;ENSG00000169991.11	93.4785	-
chr1	18905848	18905857	three_prime_UTR;IFFO2;protein_coding;ENSG00000169991.11	444.51	-
chr1	18905861	18905870	three_prime_UTR;IFFO2;protein_coding;ENSG00000169991.11	47.4318	-
chr1	18905897	18905906	three_prime_UTR;IFFO2;protein_coding;ENSG00000169991.11	48.869	-
chr1	18905914	18905923	three_prime_UTR;IFFO2;protein_coding;ENSG00000169991.11	70.7696	-
chr1	18905928	18905937	three_prime_UTR;IFFO2;protein_coding;ENSG00000169991.11	19.9227	-
chr1	18906533	18906542	three_prime_UTR;IFFO2;protein_coding;ENSG00000169991.11	4.54309	-
chr1	18906572	18906581	three_prime_UTR;IFFO2;protein_coding;ENSG00000169991.11	10.8971	-
chr1	18906602	18906611	three_prime_UTR;IFFO2;protein_coding;ENSG00000169991.11	87.0299	-
chr1	18906715	18906724	three_prime_UTR;IFFO2;protein_coding;ENSG00000169991.11	5.61497	-
chr1	18906822	18906831	three_prime_UTR;IFFO2;protein_coding;ENSG00000169991.11	117.658	-
chr1	18906854	18906863	three_prime_UTR;IFFO2;protein_coding;ENSG00000169991.11	16.6103	-
chr1	18906871	18906880	three_prime_UTR;IFFO2;protein_coding;ENSG00000169991.11	1.87635	-
chr1	18907017	18907026	three_prime_UTR;IFFO2;protein_coding;ENSG00000169991.11	2.26808	-
chr1	18907097	18907106	three_prime_UTR;IFFO2;protein_coding;ENSG00000169991.11	7.11294	-
chr1	18907138	18907147	three_prime_UTR;IFFO2;protein_coding;ENSG00000169991.11	79.2285	-
chr1	18907465	18907474	three_prime_UTR;IFFO2;protein_coding;ENSG00000169991.11	13.2591	-
chr1	18907544	18907553	three_prime_UTR;IFFO2;protein_coding;ENSG00000169991.11	191.36	-
chr1	18907569	18907578	three_prime_UTR;IFFO2;protein_coding;ENSG00000169991.11	19.1928	-
chr1	19142628	19142637	intron;UBR4;protein_coding;ENSG00000127481.15	22.8258	-
chr1	19143085	19143094	intron;UBR4;protein_coding;ENSG00000127481.15	0.669681	-
chr1	19143108	19143117	intron;UBR4;protein_coding;ENSG00000127481.15	10.5287	-
chr1	19143128	19143137	intron;UBR4;protein_coding;ENSG00000127481.15	21.32	-
chr1	19143160	19143169	intron;UBR4;protein_coding;ENSG00000127481.15	7.43396	-
chr1	19143179	19143188	intron;UBR4;protein_coding;ENSG00000127481.15	15.3823	-
chr1	19146281	19146290	intron;UBR4;protein_coding;ENSG00000127481.15	31.4989	-
chr1	19339218	19339227	three_prime_UTR;CAPZB;protein_coding;ENSG00000077549.19	74.9412	-
chr1	19339237	19339246	three_prime_UTR;CAPZB;protein_coding;ENSG00000077549.19	88.9782	-
chr1	19339276	19339285	three_prime_UTR;CAPZB;protein_coding;ENSG00000077549.19	45.5789	-
chr1	20742727	20742736	three_prime_UTR;HP1BP3;protein_coding;ENSG00000127483.19	5.84734	-
chr1	20742746	20742755	three_prime_UTR;HP1BP3;protein_coding;ENSG00000127483.19	65.5688	-
chr1	20742762	20742771	three_prime_UTR;HP1BP3;protein_coding;ENSG00000127483.19	66.2604	-
chr1	20742778	20742787	three_prime_UTR;HP1BP3;protein_coding;ENSG00000127483.19	10.0445	-
chr1	20742791	20742800	three_prime_UTR;HP1BP3;protein_coding;ENSG00000127483.19	1.66081	-
chr1	20742803	20742812	three_prime_UTR;HP1BP3;protein_coding;ENSG00000127483.19	13.1684	-
chr1	20742815	20742824	three_prime_UTR;HP1BP3;protein_coding;ENSG00000127483.19	120.952	-
chr1	20742836	20742845	three_prime_UTR;HP1BP3;protein_coding;ENSG00000127483.19	21.1915	-
chr1	20742852	20742861	three_prime_UTR;HP1BP3;protein_coding;ENSG00000127483.19	4.17645	-
chr1	20742898	20742907	three_prime_UTR;HP1BP3;protein_coding;ENSG00000127483.19	1.46289	-
chr1	20742994	20743003	three_prime_UTR;HP1BP3;protein_coding;ENSG00000127483.19	8.26848	-
chr1	20743029	20743038	three_prime_UTR;HP1BP3;protein_coding;ENSG00000127483.19	11.518	-
chr1	20743040	20743049	three_prime_UTR;HP1BP3;protein_coding;ENSG00000127483.19	56.0032	-
chr1	20743056	20743065	three_prime_UTR;HP1BP3;protein_coding;ENSG00000127483.19	36.6936	-
chr1	20744442	20744451	three_prime_UTR;HP1BP3;protein_coding;ENSG00000127483.19	7.85921	-
chr1	20744533	20744542	three_prime_UTR;HP1BP3;protein_coding;ENSG00000127483.19	1.14499	-
chr1	20744547	20744556	three_prime_UTR;HP1BP3;protein_coding;ENSG00000127483.19	7.19519	-
chr1	20744695	20744704	three_prime_UTR;HP1BP3;protein_coding;ENSG00000127483.19	4.3739	-
chr1	21143259	21143268	intron;EIF4G3;protein_coding;ENSG00000075151.24	5.73168	-
chr1	21143303	21143312	intron;EIF4G3;protein_coding;ENSG00000075151.24	22.4128	-
chr1	21143327	21143336	intron;EIF4G3;protein_coding;ENSG00000075151.24	12.2294	-
chr1	23086950	23086959	three_prime_UTR;LUZP1;protein_coding;ENSG00000169641.14	37.3623	-
chr1	23086991	23087000	three_prime_UTR;LUZP1;protein_coding;ENSG00000169641.14	49.9416	-
chr1	23087047	23087056	three_prime_UTR;LUZP1;protein_coding;ENSG00000169641.14	147.408	-
chr1	23309836	23309845	three_prime_UTR;HNRNPR;protein_coding;ENSG00000125944.21	5.04061	-
chr1	23309853	23309862	three_prime_UTR;HNRNPR;protein_coding;ENSG00000125944.21	2.11736	-
chr1	23309876	23309885	three_prime_UTR;HNRNPR;protein_coding;ENSG00000125944.21	7.4703	-
chr1	23309938	23309947	three_prime_UTR;HNRNPR;protein_coding;ENSG00000125944.21	7.32463	-
chr1	23309969	23309978	three_prime_UTR;HNRNPR;protein_coding;ENSG00000125944.21	20.0183	-
chr1	23310012	23310021	three_prime_UTR;HNRNPR;protein_coding;ENSG00000125944.21	80.9926	-
chr1	23310108	23310117	three_prime_UTR;HNRNPR;protein_coding;ENSG00000125944.21	26.1529	-
chr1	23310208	23310217	three_prime_UTR;HNRNPR;protein_coding;ENSG00000125944.21	10.1979	-
chr1	23310230	23310239	three_prime_UTR;HNRNPR;protein_coding;ENSG00000125944.21	49.623	-
chr1	23310275	23310284	three_prime_UTR;HNRNPR;protein_coding;ENSG00000125944.21	33.8839	-
chr1	23310311	23310320	three_prime_UTR;HNRNPR;protein_coding;ENSG00000125944.21	10.2604	-
chr1	23557969	23557978	three_prime_UTR;ID3;protein_coding;ENSG00000117318.9	226.604	-
chr1	23558047	23558056	three_prime_UTR;ID3;protein_coding;ENSG00000117318.9	384.366	-
chr1	23558087	23558096	three_prime_UTR;ID3;protein_coding;ENSG00000117318.9	66.862	-
chr1	23558123	23558132	three_prime_UTR;ID3;protein_coding;ENSG00000117318.9	357.061	-
chr1	23558166	23558175	three_prime_UTR;ID3;protein_coding;ENSG00000117318.9	103.543	-
chr1	23558407	23558416	three_prime_UTR;ID3;protein_coding;ENSG00000117318.9	6.46597	-
chr1	23558946	23558955	three_prime_UTR;ID3;protein_coding;ENSG00000117318.9	25.7871	-
chr1	23558964	23558973	CDS;ID3;protein_coding;ENSG00000117318.9	59.5332	-
chr1	23691819	23691828	five_prime_UTR;RPL11;protein_coding;ENSG00000142676.14	31.2202	+
chr1	23692645	23692654	three_prime_UTR;RPL11;protein_coding;ENSG00000142676.14	6.56564	+
chr1	23692660	23692669	three_prime_UTR;RPL11;protein_coding;ENSG00000142676.14	1.80411	+
chr1	23692686	23692695	three_prime_UTR;RPL11;protein_coding;ENSG00000142676.14	14.2537	+
chr1	23692735	23692744	three_prime_UTR;RPL11;protein_coding;ENSG00000142676.14	6.84633	+
chr1	23692747	23692756	three_prime_UTR;RPL11;protein_coding;ENSG00000142676.14	100.424	+
chr1	23693807	23693816	three_prime_UTR;RPL11;protein_coding;ENSG00000142676.14	92.8782	+
chr1	23693819	23693828	three_prime_UTR;RPL11;protein_coding;ENSG00000142676.14	15.7446	+
chr1	23693838	23693847	three_prime_UTR;RPL11;protein_coding;ENSG00000142676.14	12.4578	+
chr1	23693865	23693874	three_prime_UTR;RPL11;protein_coding;ENSG00000142676.14	12.2867	+
chr1	23693884	23693893	three_prime_UTR;RPL11;protein_coding;ENSG00000142676.14	1.08516	+
chr1	23694669	23694678	three_prime_UTR;RPL11;protein_coding;ENSG00000142676.14	29.396	+
chr1	23694685	23694694	three_prime_UTR;RPL11;protein_coding;ENSG00000142676.14	10.0974	+
chr1	23694706	23694715	three_prime_UTR;RPL11;protein_coding;ENSG00000142676.14	11.1056	+
chr1	23694724	23694733	three_prime_UTR;RPL11;protein_coding;ENSG00000142676.14	8.99131	+
chr1	23694745	23694754	three_prime_UTR;RPL11;protein_coding;ENSG00000142676.14	110.496	+
chr1	23694778	23694787	three_prime_UTR;RPL11;protein_coding;ENSG00000142676.14	6.4191	+
chr1	23695800	23695809	three_prime_UTR;RPL11;protein_coding;ENSG00000142676.14	21.2828	+
chr1	23695812	23695821	three_prime_UTR;RPL11;protein_coding;ENSG00000142676.14	32.1349	+
chr1	23695825	23695834	three_prime_UTR;RPL11;protein_coding;ENSG00000142676.14	33.7911	+
chr1	23695847	23695856	three_prime_UTR;RPL11;protein_coding;ENSG00000142676.14	37.7173	+
chr1	23695857	23695866	three_prime_UTR;RPL11;protein_coding;ENSG00000142676.14	8.21029	+
chr1	23695869	23695878	three_prime_UTR;RPL11;protein_coding;ENSG00000142676.14	42.7428	+
chr1	23695897	23695906	three_prime_UTR;RPL11;protein_coding;ENSG00000142676.14	6.2952	+
chr1	23696338	23696347	intron;RPL11;protein_coding;ENSG00000142676.14	96.9729	+
chr1	23696355	23696364	three_prime_UTR;RPL11;protein_coding;ENSG00000142676.14	30.8596	+
chr1	23696370	23696379	three_prime_UTR;RPL11;protein_coding;ENSG00000142676.14	25.1099	+
chr1	23761955	23761964	three_prime_UTR;ELOA;protein_coding;ENSG00000011007.13	111.357	+
chr1	23961916	23961925	three_prime_UTR;PNRC2;protein_coding;ENSG00000189266.13	21.7722	+
chr1	23961935	23961944	three_prime_UTR;PNRC2;protein_coding;ENSG00000189266.13	27.3915	+
chr1	23962015	23962024	three_prime_UTR;PNRC2;protein_coding;ENSG00000189266.13	53.0036	+
chr1	23962038	23962047	three_prime_UTR;PNRC2;protein_coding;ENSG00000189266.13	9.98941	+
chr1	23962080	23962089	three_prime_UTR;PNRC2;protein_coding;ENSG00000189266.13	26.2046	+
chr1	23962183	23962192	three_prime_UTR;PNRC2;protein_coding;ENSG00000189266.13	18.3179	+
chr1	23962203	23962212	three_prime_UTR;PNRC2;protein_coding;ENSG00000189266.13	4.56172	+
chr1	23962488	23962497	three_prime_UTR;PNRC2;protein_coding;ENSG00000189266.13	104.301	+
chr1	23962508	23962517	three_prime_UTR;PNRC2;protein_coding;ENSG00000189266.13	34.8716	+
chr1	23962518	23962527	three_prime_UTR;PNRC2;protein_coding;ENSG00000189266.13	216.428	+
chr1	23962549	23962558	three_prime_UTR;PNRC2;protein_coding;ENSG00000189266.13	608.956	+
chr1	23962692	23962701	three_prime_UTR;PNRC2;protein_coding;ENSG00000189266.13	157.814	+
chr1	23962702	23962711	three_prime_UTR;PNRC2;protein_coding;ENSG00000189266.13	133.051	+
chr1	23962985	23962994	three_prime_UTR;PNRC2;protein_coding;ENSG00000189266.13	16.8403	+
chr1	23963013	23963022	three_prime_UTR;PNRC2;protein_coding;ENSG00000189266.13	10.1612	+
chr1	23963081	23963090	three_prime_UTR;PNRC2;protein_coding;ENSG00000189266.13	21.8722	+
chr1	23963177	23963186	three_prime_UTR;PNRC2;protein_coding;ENSG00000189266.13	43.0311	+
chr1	23963254	23963263	three_prime_UTR;PNRC2;protein_coding;ENSG00000189266.13	171.882	+
chr1	23963321	23963330	three_prime_UTR;PNRC2;protein_coding;ENSG00000189266.13	12.6369	+
chr1	23963344	23963353	three_prime_UTR;PNRC2;protein_coding;ENSG00000189266.13	25.0311	+
chr1	23963372	23963381	three_prime_UTR;PNRC2;protein_coding;ENSG00000189266.13	86.981	+
chr1	23963400	23963409	three_prime_UTR;PNRC2;protein_coding;ENSG00000189266.13	103.143	+
chr1	23969351	23969360	three_prime_UTR;SRSF10;protein_coding;ENSG00000188529.15	6.47002	-
chr1	24672565	24672574	three_prime_UTR;SRRM1;protein_coding;ENSG00000133226.18	21.9386	+
chr1	24672627	24672636	three_prime_UTR;SRRM1;protein_coding;ENSG00000133226.18	49.129	+
chr1	24672984	24672993	three_prime_UTR;SRRM1;protein_coding;ENSG00000133226.18	6.64832	+
chr1	24899583	24899592	three_prime_UTR;RUNX3;protein_coding;ENSG00000020633.19	8.25027	-
chr1	24899618	24899627	three_prime_UTR;RUNX3;protein_coding;ENSG00000020633.19	58.6909	-
chr1	24899633	24899642	three_prime_UTR;RUNX3;protein_coding;ENSG00000020633.19	58.436	-
chr1	24899735	24899744	three_prime_UTR;RUNX3;protein_coding;ENSG00000020633.19	86.794	-
chr1	24899763	24899772	three_prime_UTR;RUNX3;protein_coding;ENSG00000020633.19	75.147	-
chr1	24899775	24899784	three_prime_UTR;RUNX3;protein_coding;ENSG00000020633.19	250.911	-
chr1	25242308	25242317	three_prime_UTR;RSRP1;protein_coding;ENSG00000117616.18	69.399	-
chr1	25242336	25242345	three_prime_UTR;RSRP1;protein_coding;ENSG00000117616.18	9.38607	-
chr1	25242359	25242368	three_prime_UTR;RSRP1;protein_coding;ENSG00000117616.18	51.2668	-
chr1	25242400	25242409	three_prime_UTR;RSRP1;protein_coding;ENSG00000117616.18	18.0671	-
chr1	25242421	25242430	three_prime_UTR;RSRP1;protein_coding;ENSG00000117616.18	7.12675	-
chr1	25242478	25242487	three_prime_UTR;RSRP1;protein_coding;ENSG00000117616.18	11.6838	-
chr1	25356817	25356826	CDS;TMEM50A;protein_coding;ENSG00000183726.11	271.937	+
chr1	25360672	25360681	CDS;TMEM50A;protein_coding;ENSG00000183726.11	37.499	+
chr1	25360710	25360719	three_prime_UTR;TMEM50A;protein_coding;ENSG00000183726.11	6.13079	+
chr1	25360752	25360761	three_prime_UTR;TMEM50A;protein_coding;ENSG00000183726.11	93.5267	+
chr1	25360799	25360808	three_prime_UTR;TMEM50A;protein_coding;ENSG00000183726.11	20.5144	+
chr1	25567875	25567884	three_prime_UTR;LDLRAP1;protein_coding;ENSG00000157978.12	70.2522	+
chr1	25568375	25568384	three_prime_UTR;LDLRAP1;protein_coding;ENSG00000157978.12	55.0689	+
chr1	25568430	25568439	three_prime_UTR;LDLRAP1;protein_coding;ENSG00000157978.12	5.87902	+
chr1	25751254	25751263	intron;MAN1C1;protein_coding;ENSG00000117643.15	17.0604	+
chr1	25782673	25782682	three_prime_UTR;MAN1C1;protein_coding;ENSG00000117643.15	2.36829	+
chr1	25782690	25782699	three_prime_UTR;MAN1C1;protein_coding;ENSG00000117643.15	59.1473	+
chr1	25783664	25783673	three_prime_UTR;MAN1C1;protein_coding;ENSG00000117643.15	158.294	+
chr1	25783690	25783699	three_prime_UTR;MAN1C1;protein_coding;ENSG00000117643.15	14.5109	+
chr1	25783871	25783880	three_prime_UTR;MAN1C1;protein_coding;ENSG00000117643.15	37.3237	+
chr1	25783881	25783890	three_prime_UTR;MAN1C1;protein_coding;ENSG00000117643.15	141.449	+
chr1	25783930	25783939	three_prime_UTR;MAN1C1;protein_coding;ENSG00000117643.15	81.9182	+
chr1	25784344	25784353	three_prime_UTR;MAN1C1;protein_coding;ENSG00000117643.15	17.7579	+
chr1	25784364	25784373	three_prime_UTR;MAN1C1;protein_coding;ENSG00000117643.15	3.09086	+
chr1	25900637	25900646	three_prime_UTR;STMN1;protein_coding;ENSG00000117632.23	14.0937	-
chr1	25900670	25900679	three_prime_UTR;STMN1;protein_coding;ENSG00000117632.23	27.047	-
chr1	25900736	25900745	three_prime_UTR;STMN1;protein_coding;ENSG00000117632.23	26.5338	-
chr1	25900765	25900774	three_prime_UTR;STMN1;protein_coding;ENSG00000117632.23	406.544	-
chr1	25900782	25900791	three_prime_UTR;STMN1;protein_coding;ENSG00000117632.23	52.3251	-
chr1	25900797	25900806	three_prime_UTR;STMN1;protein_coding;ENSG00000117632.23	31.4529	-
chr1	25900814	25900823	three_prime_UTR;STMN1;protein_coding;ENSG00000117632.23	72.3726	-
chr1	25900856	25900865	three_prime_UTR;STMN1;protein_coding;ENSG00000117632.23	67.6453	-
chr1	25900913	25900922	three_prime_UTR;STMN1;protein_coding;ENSG00000117632.23	59.3601	-
chr1	25900939	25900948	three_prime_UTR;STMN1;protein_coding;ENSG00000117632.23	301.239	-
chr1	25900993	25901002	three_prime_UTR;STMN1;protein_coding;ENSG00000117632.23	18.6883	-
chr1	25901011	25901020	three_prime_UTR;STMN1;protein_coding;ENSG00000117632.23	52.1768	-
chr1	25902976	25902985	exon;STMN1;protein_coding;ENSG00000117632.23	9.49137	-
chr1	26280152	26280161	five_prime_UTR;SH3BGRL3;protein_coding;ENSG00000142669.15	6.27026	+
chr1	26280168	26280177	CDS;SH3BGRL3;protein_coding;ENSG00000142669.15	61.0939	+
chr1	26280178	26280187	CDS;SH3BGRL3;protein_coding;ENSG00000142669.15	13.1605	+
chr1	26280765	26280774	CDS;SH3BGRL3;protein_coding;ENSG00000142669.15	29.7243	+
chr1	26280791	26280800	CDS;SH3BGRL3;protein_coding;ENSG00000142669.15	9.79359	+
chr1	26280813	26280822	CDS;SH3BGRL3;protein_coding;ENSG00000142669.15	54.2575	+
chr1	26280858	26280867	CDS;SH3BGRL3;protein_coding;ENSG00000142669.15	2.34704	+
chr1	26280868	26280877	CDS;SH3BGRL3;protein_coding;ENSG00000142669.15	1.79391	+
chr1	26280919	26280928	CDS;SH3BGRL3;protein_coding;ENSG00000142669.15	47.8377	+
chr1	26281055	26281064	three_prime_UTR;SH3BGRL3;protein_coding;ENSG00000142669.15	80.4615	+
chr1	26281088	26281097	three_prime_UTR;SH3BGRL3;protein_coding;ENSG00000142669.15	207.87	+
chr1	26281100	26281109	three_prime_UTR;SH3BGRL3;protein_coding;ENSG00000142669.15	53.1821	+
chr1	26281119	26281128	three_prime_UTR;SH3BGRL3;protein_coding;ENSG00000142669.15	12.9935	+
chr1	26281154	26281163	three_prime_UTR;SH3BGRL3;protein_coding;ENSG00000142669.15	13.8338	+
chr1	26281195	26281204	three_prime_UTR;SH3BGRL3;protein_coding;ENSG00000142669.15	84.6602	+
chr1	26281218	26281227	three_prime_UTR;SH3BGRL3;protein_coding;ENSG00000142669.15	4.47636	+
chr1	26281242	26281251	three_prime_UTR;SH3BGRL3;protein_coding;ENSG00000142669.15	16.3004	+
chr1	26281273	26281282	three_prime_UTR;SH3BGRL3;protein_coding;ENSG00000142669.15	84.0503	+
chr1	26281288	26281297	three_prime_UTR;SH3BGRL3;protein_coding;ENSG00000142669.15	30.6803	+
chr1	26281310	26281319	three_prime_UTR;SH3BGRL3;protein_coding;ENSG00000142669.15	24.1194	+
chr1	26281324	26281333	three_prime_UTR;SH3BGRL3;protein_coding;ENSG00000142669.15	2.23368	+
chr1	26281370	26281379	three_prime_UTR;SH3BGRL3;protein_coding;ENSG00000142669.15	15.5877	+
chr1	26281421	26281430	three_prime_UTR;SH3BGRL3;protein_coding;ENSG00000142669.15	54.0947	+
chr1	26318005	26318014	five_prime_UTR;CD52;protein_coding;ENSG00000169442.9	41.0558	+
chr1	26320166	26320175	intron;CD52;protein_coding;ENSG00000169442.9	5.95126	+
chr1	26320247	26320256	CDS;CD52;protein_coding;ENSG00000169442.9	24.8954	+
chr1	26320274	26320283	CDS;CD52;protein_coding;ENSG00000169442.9	0.993031	+
chr1	26320316	26320325	three_prime_UTR;CD52;protein_coding;ENSG00000169442.9	34.9758	+
chr1	26320335	26320344	three_prime_UTR;CD52;protein_coding;ENSG00000169442.9	184.43	+
chr1	26320415	26320424	three_prime_UTR;CD52;protein_coding;ENSG00000169442.9	6.40519	+
chr1	26320456	26320465	three_prime_UTR;CD52;protein_coding;ENSG00000169442.9	15.2619	+
chr1	26473505	26473514	CDS;HMGN2;protein_coding;ENSG00000198830.11	10.0439	+
chr1	26473608	26473617	exon;HMGN2;protein_coding;ENSG00000198830.11	3.55469	+
chr1	26473671	26473680	exon;HMGN2;protein_coding;ENSG00000198830.11	28.9339	+
chr1	26473684	26473693	exon;HMGN2;protein_coding;ENSG00000198830.11	50.4067	+
chr1	26473723	26473732	CDS;HMGN2;protein_coding;ENSG00000198830.11	5.17594	+
chr1	26473747	26473756	exon;HMGN2;protein_coding;ENSG00000198830.11	19.5611	+
chr1	26473794	26473803	exon;HMGN2;protein_coding;ENSG00000198830.11	6.03518	+
chr1	26474025	26474034	exon;HMGN2;protein_coding;ENSG00000198830.11	12.2851	+
chr1	26475213	26475222	three_prime_UTR;HMGN2;protein_coding;ENSG00000198830.11	82.8317	+
chr1	26475231	26475240	three_prime_UTR;HMGN2;protein_coding;ENSG00000198830.11	45.3424	+
chr1	26773665	26773674	CDS;ARID1A;protein_coding;ENSG00000117713.21	12.5583	+
chr1	26773698	26773707	CDS;ARID1A;protein_coding;ENSG00000117713.21	19.5833	+
chr1	26773794	26773803	intron;ARID1A;protein_coding;ENSG00000117713.21	51.4252	+
chr1	26773807	26773816	CDS;ARID1A;protein_coding;ENSG00000117713.21	25.8636	+
chr1	26773820	26773829	CDS;ARID1A;protein_coding;ENSG00000117713.21	188.093	+
chr1	26773837	26773846	CDS;ARID1A;protein_coding;ENSG00000117713.21	7.37198	+
chr1	26774326	26774335	intron;ARID1A;protein_coding;ENSG00000117713.21	60.684	+
chr1	26774351	26774360	CDS;ARID1A;protein_coding;ENSG00000117713.21	12.6229	+
chr1	26780866	26780875	three_prime_UTR;ARID1A;protein_coding;ENSG00000117713.21	38.6032	+
chr1	26780925	26780934	three_prime_UTR;ARID1A;protein_coding;ENSG00000117713.21	3.89492	+
chr1	26780949	26780958	three_prime_UTR;ARID1A;protein_coding;ENSG00000117713.21	29.547	+
chr1	26780963	26780972	three_prime_UTR;ARID1A;protein_coding;ENSG00000117713.21	1.81364	+
chr1	26781060	26781069	three_prime_UTR;ARID1A;protein_coding;ENSG00000117713.21	39.6749	+
chr1	26781535	26781544	three_prime_UTR;ARID1A;protein_coding;ENSG00000117713.21	91.1728	+
chr1	26781613	26781622	three_prime_UTR;ARID1A;protein_coding;ENSG00000117713.21	48.3618	+
chr1	26781654	26781663	three_prime_UTR;ARID1A;protein_coding;ENSG00000117713.21	17.6411	+
chr1	26781678	26781687	three_prime_UTR;ARID1A;protein_coding;ENSG00000117713.21	20.6053	+
chr1	26781931	26781940	three_prime_UTR;ARID1A;protein_coding;ENSG00000117713.21	3.85595	+
chr1	26781951	26781960	three_prime_UTR;ARID1A;protein_coding;ENSG00000117713.21	19.7879	+
chr1	26782031	26782040	three_prime_UTR;ARID1A;protein_coding;ENSG00000117713.21	2.09813	+
chr1	26782053	26782062	three_prime_UTR;ARID1A;protein_coding;ENSG00000117713.21	2.06814	+
chr1	27761463	27761472	three_prime_UTR;FAM76A;protein_coding;ENSG00000009780.16	12.0119	+
chr1	27761484	27761493	three_prime_UTR;FAM76A;protein_coding;ENSG00000009780.16	24.5415	+
chr1	27761507	27761516	three_prime_UTR;FAM76A;protein_coding;ENSG00000009780.16	27.5786	+
chr1	27761522	27761531	three_prime_UTR;FAM76A;protein_coding;ENSG00000009780.16	3.80697	+
chr1	27851413	27851422	three_prime_UTR;PPP1R8;protein_coding;ENSG00000117751.18	35.9448	+
chr1	27851429	27851438	three_prime_UTR;PPP1R8;protein_coding;ENSG00000117751.18	2.40548	+
chr1	27851456	27851465	three_prime_UTR;PPP1R8;protein_coding;ENSG00000117751.18	44.3675	+
chr1	27851477	27851486	three_prime_UTR;PPP1R8;protein_coding;ENSG00000117751.18	16.1414	+
chr1	28201084	28201093	three_prime_UTR;DNAJC8;protein_coding;ENSG00000126698.11	18.5337	-
chr1	28498140	28498149	three_prime_UTR;PHACTR4;protein_coding;ENSG00000204138.13	125.387	+
chr1	28498200	28498209	three_prime_UTR;PHACTR4;protein_coding;ENSG00000204138.13	8.22356	+
chr1	28498301	28498310	three_prime_UTR;PHACTR4;protein_coding;ENSG00000204138.13	41.4328	+
chr1	28498388	28498397	three_prime_UTR;PHACTR4;protein_coding;ENSG00000204138.13	6.01242	+
chr1	28500208	28500217	three_prime_UTR;PHACTR4;protein_coding;ENSG00000204138.13	28.8898	+
chr1	28507359	28507368	intron;RCC1;protein_coding;ENSG00000180198.17	198.332	+
chr1	28507457	28507466	intron;RCC1;protein_coding;ENSG00000180198.17	31.4234	+
chr1	28507505	28507514	intron;RCC1;protein_coding;ENSG00000180198.17	97.8836	+
chr1	28508124	28508133	intron;RCC1;protein_coding;ENSG00000180198.17	26.2885	+
chr1	28508150	28508159	five_prime_UTR;RCC1;protein_coding;ENSG00000180198.17	7.5279	+
chr1	28508169	28508178	intron;RCC1;protein_coding;ENSG00000180198.17	12.1847	+
chr1	28508623	28508632	intron;RCC1;protein_coding;ENSG00000180198.17	9.46592	+
chr1	28508661	28508670	intron;RCC1;protein_coding;ENSG00000180198.17	7.4164	+
chr1	28508675	28508684	intron;RCC1;protein_coding;ENSG00000180198.17	8.60624	+
chr1	28508696	28508705	intron;RCC1;protein_coding;ENSG00000180198.17	152.218	+
chr1	28622094	28622103	three_prime_UTR;TAF12;protein_coding;ENSG00000120656.14	95.6943	-
chr1	28622107	28622116	three_prime_UTR;TAF12;protein_coding;ENSG00000120656.14	56.5521	-
chr1	28622126	28622135	five_prime_UTR;TAF12;protein_coding;ENSG00000120656.14	48.8783	-
chr1	28622140	28622149	five_prime_UTR;TAF12;protein_coding;ENSG00000120656.14	8.66128	-
chr1	28622160	28622169	five_prime_UTR;TAF12;protein_coding;ENSG00000120656.14	73.8317	-
chr1	29018085	29018094	intron;EPB41;protein_coding;ENSG00000159023.22	27.5231	+
chr1	29018114	29018123	intron;EPB41;protein_coding;ENSG00000159023.22	50.2955	+
chr1	29018127	29018136	intron;EPB41;protein_coding;ENSG00000159023.22	4.95162	+
chr1	29018137	29018146	intron;EPB41;protein_coding;ENSG00000159023.22	41.8177	+
chr1	29018165	29018174	intron;EPB41;protein_coding;ENSG00000159023.22	12.9927	+
chr1	29018209	29018218	intron;EPB41;protein_coding;ENSG00000159023.22	9.46154	+
chr1	29018306	29018315	three_prime_UTR;EPB41;protein_coding;ENSG00000159023.22	9.20221	+
chr1	29018331	29018340	three_prime_UTR;EPB41;protein_coding;ENSG00000159023.22	31.2624	+
chr1	29018341	29018350	three_prime_UTR;EPB41;protein_coding;ENSG00000159023.22	17.359	+
chr1	29116993	29117002	three_prime_UTR;EPB41;protein_coding;ENSG00000159023.22	17.3377	+
chr1	29118110	29118119	three_prime_UTR;EPB41;protein_coding;ENSG00000159023.22	29.7517	+
chr1	29119780	29119789	three_prime_UTR;EPB41;protein_coding;ENSG00000159023.22	34.112	+
chr1	29119819	29119828	three_prime_UTR;EPB41;protein_coding;ENSG00000159023.22	29.0347	+
chr1	29119835	29119844	three_prime_UTR;EPB41;protein_coding;ENSG00000159023.22	3.24235	+
chr1	29119859	29119868	three_prime_UTR;EPB41;protein_coding;ENSG00000159023.22	21.0114	+
chr1	29119894	29119903	three_prime_UTR;EPB41;protein_coding;ENSG00000159023.22	5.59149	+
chr1	29119926	29119935	three_prime_UTR;EPB41;protein_coding;ENSG00000159023.22	2.9245	+
chr1	29119941	29119950	three_prime_UTR;EPB41;protein_coding;ENSG00000159023.22	31.7919	+
chr1	29147880	29147889	three_prime_UTR;SRSF4;protein_coding;ENSG00000116350.18	19.1752	-
chr1	29147898	29147907	three_prime_UTR;SRSF4;protein_coding;ENSG00000116350.18	120.699	-
chr1	29147910	29147919	three_prime_UTR;SRSF4;protein_coding;ENSG00000116350.18	61.3448	-
chr1	29147944	29147953	three_prime_UTR;SRSF4;protein_coding;ENSG00000116350.18	38.7962	-
chr1	29147957	29147966	three_prime_UTR;SRSF4;protein_coding;ENSG00000116350.18	55.4751	-
chr1	29147967	29147976	three_prime_UTR;SRSF4;protein_coding;ENSG00000116350.18	19.2008	-
chr1	29147988	29147997	three_prime_UTR;SRSF4;protein_coding;ENSG00000116350.18	34.3511	-
chr1	30732518	30732527	three_prime_UTR;LAPTM5;protein_coding;ENSG00000162511.8	24.4652	-
chr1	30732530	30732539	three_prime_UTR;LAPTM5;protein_coding;ENSG00000162511.8	11.7194	-
chr1	30732547	30732556	three_prime_UTR;LAPTM5;protein_coding;ENSG00000162511.8	10.6593	-
chr1	30732566	30732575	three_prime_UTR;LAPTM5;protein_coding;ENSG00000162511.8	14.365	-
chr1	30732700	30732709	three_prime_UTR;LAPTM5;protein_coding;ENSG00000162511.8	2.21201	-
chr1	30732779	30732788	three_prime_UTR;LAPTM5;protein_coding;ENSG00000162511.8	2.31577	-
chr1	30732835	30732844	three_prime_UTR;LAPTM5;protein_coding;ENSG00000162511.8	3.37492	-
chr1	30732895	30732904	three_prime_UTR;LAPTM5;protein_coding;ENSG00000162511.8	36.9332	-
chr1	30732916	30732925	three_prime_UTR;LAPTM5;protein_coding;ENSG00000162511.8	27.353	-
chr1	30733083	30733092	three_prime_UTR;LAPTM5;protein_coding;ENSG00000162511.8	218.503	-
chr1	30733134	30733143	three_prime_UTR;LAPTM5;protein_coding;ENSG00000162511.8	67.0049	-
chr1	30733147	30733156	three_prime_UTR;LAPTM5;protein_coding;ENSG00000162511.8	574.02	-
chr1	30733157	30733166	three_prime_UTR;LAPTM5;protein_coding;ENSG00000162511.8	364.08	-
chr1	30733180	30733189	three_prime_UTR;LAPTM5;protein_coding;ENSG00000162511.8	131.063	-
chr1	30733344	30733353	three_prime_UTR;LAPTM5;protein_coding;ENSG00000162511.8	26.9031	-
chr1	30733408	30733417	three_prime_UTR;LAPTM5;protein_coding;ENSG00000162511.8	11.6533	-
chr1	30733508	30733517	three_prime_UTR;LAPTM5;protein_coding;ENSG00000162511.8	1.52243	-
chr1	30733536	30733545	three_prime_UTR;LAPTM5;protein_coding;ENSG00000162511.8	7.48057	-
chr1	30733576	30733585	three_prime_UTR;LAPTM5;protein_coding;ENSG00000162511.8	53.9559	-
chr1	30733600	30733609	three_prime_UTR;LAPTM5;protein_coding;ENSG00000162511.8	56.4642	-
chr1	30735193	30735202	CDS;LAPTM5;protein_coding;ENSG00000162511.8	1.26428	-
chr1	30737620	30737629	CDS;LAPTM5;protein_coding;ENSG00000162511.8	1.78984	-
chr1	30737632	30737641	CDS;LAPTM5;protein_coding;ENSG00000162511.8	76.2935	-
chr1	30737647	30737656	CDS;LAPTM5;protein_coding;ENSG00000162511.8	165.948	-
chr1	30737671	30737680	CDS;LAPTM5;protein_coding;ENSG00000162511.8	27.7938	-
chr1	30737696	30737705	CDS;LAPTM5;protein_coding;ENSG00000162511.8	17.2614	-
chr1	30738940	30738949	CDS;LAPTM5;protein_coding;ENSG00000162511.8	1.46658	-
chr1	30738950	30738959	CDS;LAPTM5;protein_coding;ENSG00000162511.8	15.9759	-
chr1	30738961	30738970	CDS;LAPTM5;protein_coding;ENSG00000162511.8	23.6481	-
chr1	30738982	30738991	CDS;LAPTM5;protein_coding;ENSG00000162511.8	17.1612	-
chr1	30738993	30739002	CDS;LAPTM5;protein_coding;ENSG00000162511.8	27.2753	-
chr1	30739004	30739013	CDS;LAPTM5;protein_coding;ENSG00000162511.8	8.7276	-
chr1	30739014	30739023	CDS;LAPTM5;protein_coding;ENSG00000162511.8	13.5256	-
chr1	30739040	30739049	CDS;LAPTM5;protein_coding;ENSG00000162511.8	49.791	-
chr1	30739824	30739833	CDS;LAPTM5;protein_coding;ENSG00000162511.8	10.6291	-
chr1	30739862	30739871	CDS;LAPTM5;protein_coding;ENSG00000162511.8	27.9204	-
chr1	30739879	30739888	CDS;LAPTM5;protein_coding;ENSG00000162511.8	5.79941	-
chr1	30739898	30739907	CDS;LAPTM5;protein_coding;ENSG00000162511.8	35.8759	-
chr1	30739919	30739928	CDS;LAPTM5;protein_coding;ENSG00000162511.8	9.30289	-
chr1	30741655	30741664	CDS;LAPTM5;protein_coding;ENSG00000162511.8	19.8841	-
chr1	30741669	30741678	CDS;LAPTM5;protein_coding;ENSG00000162511.8	66.2008	-
chr1	30741679	30741688	CDS;LAPTM5;protein_coding;ENSG00000162511.8	14.3123	-
chr1	30742528	30742537	CDS;LAPTM5;protein_coding;ENSG00000162511.8	68.4292	-
chr1	30757677	30757686	CDS;LAPTM5;protein_coding;ENSG00000162511.8	5.786	-
chr1	30757694	30757703	CDS;LAPTM5;protein_coding;ENSG00000162511.8	54.7513	-
chr1	30757719	30757728	CDS;LAPTM5;protein_coding;ENSG00000162511.8	32.7976	-
chr1	30931646	30931655	three_prime_UTR;PUM1;protein_coding;ENSG00000134644.16	48.7622	-
chr1	30931661	30931670	three_prime_UTR;PUM1;protein_coding;ENSG00000134644.16	2.7191	-
chr1	30931693	30931702	three_prime_UTR;PUM1;protein_coding;ENSG00000134644.16	18.4692	-
chr1	30931712	30931721	three_prime_UTR;PUM1;protein_coding;ENSG00000134644.16	58.6817	-
chr1	30931724	30931733	three_prime_UTR;PUM1;protein_coding;ENSG00000134644.16	90.0694	-
chr1	30931793	30931802	three_prime_UTR;PUM1;protein_coding;ENSG00000134644.16	20.4259	-
chr1	30931805	30931814	three_prime_UTR;PUM1;protein_coding;ENSG00000134644.16	20.7854	-
chr1	30931992	30932001	three_prime_UTR;PUM1;protein_coding;ENSG00000134644.16	13.5165	-
chr1	30932088	30932097	three_prime_UTR;PUM1;protein_coding;ENSG00000134644.16	35.6044	-
chr1	30932130	30932139	three_prime_UTR;PUM1;protein_coding;ENSG00000134644.16	60.7442	-
chr1	30932257	30932266	three_prime_UTR;PUM1;protein_coding;ENSG00000134644.16	107.434	-
chr1	30932890	30932899	three_prime_UTR;PUM1;protein_coding;ENSG00000134644.16	20.8046	-
chr1	30932970	30932979	three_prime_UTR;PUM1;protein_coding;ENSG00000134644.16	133.634	-
chr1	30933025	30933034	three_prime_UTR;PUM1;protein_coding;ENSG00000134644.16	66.5192	-
chr1	31259729	31259738	three_prime_UTR;SNRNP40;protein_coding;ENSG00000060688.13	23.7891	-
chr1	31259753	31259762	three_prime_UTR;SNRNP40;protein_coding;ENSG00000060688.13	31.3939	-
chr1	31906651	31906660	three_prime_UTR;PTP4A2;protein_coding;ENSG00000184007.22	124.778	-
chr1	31906721	31906730	three_prime_UTR;PTP4A2;protein_coding;ENSG00000184007.22	17.5845	-
chr1	31906750	31906759	three_prime_UTR;PTP4A2;protein_coding;ENSG00000184007.22	81.9776	-
chr1	31906762	31906771	three_prime_UTR;PTP4A2;protein_coding;ENSG00000184007.22	6.2816	-
chr1	31907229	31907238	three_prime_UTR;PTP4A2;protein_coding;ENSG00000184007.22	8.75099	-
chr1	31907291	31907300	three_prime_UTR;PTP4A2;protein_coding;ENSG00000184007.22	93.1039	-
chr1	31908305	31908314	three_prime_UTR;PTP4A2;protein_coding;ENSG00000184007.22	6.3646	-
chr1	31908345	31908354	three_prime_UTR;PTP4A2;protein_coding;ENSG00000184007.22	13.4305	-
chr1	31908372	31908381	three_prime_UTR;PTP4A2;protein_coding;ENSG00000184007.22	196.953	-
chr1	31908449	31908458	three_prime_UTR;PTP4A2;protein_coding;ENSG00000184007.22	26.6745	-
chr1	31919010	31919019	CDS;PTP4A2;protein_coding;ENSG00000184007.22	34.1382	-
chr1	31919068	31919077	five_prime_UTR;PTP4A2;protein_coding;ENSG00000184007.22	66.7848	-
chr1	31919112	31919121	five_prime_UTR;PTP4A2;protein_coding;ENSG00000184007.22	36.298	-
chr1	31919360	31919369	five_prime_UTR;PTP4A2;protein_coding;ENSG00000184007.22	31.4599	-
chr1	31919446	31919455	five_prime_UTR;PTP4A2;protein_coding;ENSG00000184007.22	16.4655	-
chr1	31919467	31919476	five_prime_UTR;PTP4A2;protein_coding;ENSG00000184007.22	113.088	-
chr1	31919495	31919504	five_prime_UTR;PTP4A2;protein_coding;ENSG00000184007.22	2.3971	-
chr1	31919506	31919515	five_prime_UTR;PTP4A2;protein_coding;ENSG00000184007.22	40.8295	-
chr1	31919529	31919538	five_prime_UTR;PTP4A2;protein_coding;ENSG00000184007.22	20.0766	-
chr1	32042847	32042856	three_prime_UTR;KHDRBS1;protein_coding;ENSG00000121774.18	143.537	+
chr1	32042870	32042879	three_prime_UTR;KHDRBS1;protein_coding;ENSG00000121774.18	20.3736	+
chr1	32043772	32043781	three_prime_UTR;KHDRBS1;protein_coding;ENSG00000121774.18	2.08207	+
chr1	32171278	32171287	three_prime_UTR;KPNA6;protein_coding;ENSG00000025800.14	50.174	+
chr1	32266851	32266860	intron;LCK;protein_coding;ENSG00000182866.17	7.87868	+
chr1	32266888	32266897	intron;LCK;protein_coding;ENSG00000182866.17	9.1004	+
chr1	32333140	32333149	three_prime_UTR;HDAC1;protein_coding;ENSG00000116478.12	49.2368	+
chr1	32333171	32333180	three_prime_UTR;HDAC1;protein_coding;ENSG00000116478.12	1.5419	+
chr1	32333413	32333422	three_prime_UTR;HDAC1;protein_coding;ENSG00000116478.12	80.2673	+
chr1	32672475	32672484	three_prime_UTR;RBBP4;protein_coding;ENSG00000162521.19	66.3733	+
chr1	32672638	32672647	intron;RBBP4;protein_coding;ENSG00000162521.19	38.8231	+
chr1	32672652	32672661	three_prime_UTR;RBBP4;protein_coding;ENSG00000162521.19	57.3844	+
chr1	32672662	32672671	three_prime_UTR;RBBP4;protein_coding;ENSG00000162521.19	48.6014	+
chr1	32672672	32672681	three_prime_UTR;RBBP4;protein_coding;ENSG00000162521.19	76.6523	+
chr1	32672786	32672795	intron;RBBP4;protein_coding;ENSG00000162521.19	228.418	+
chr1	32672801	32672810	three_prime_UTR;RBBP4;protein_coding;ENSG00000162521.19	9.94762	+
chr1	32672875	32672884	three_prime_UTR;RBBP4;protein_coding;ENSG00000162521.19	180.03	+
chr1	32672890	32672899	three_prime_UTR;RBBP4;protein_coding;ENSG00000162521.19	5.64265	+
chr1	32679632	32679641	intron;RBBP4;protein_coding;ENSG00000162521.19	23.5874	+
chr1	32679650	32679659	three_prime_UTR;RBBP4;protein_coding;ENSG00000162521.19	69.8049	+
chr1	32679705	32679714	three_prime_UTR;RBBP4;protein_coding;ENSG00000162521.19	12.1563	+
chr1	32679724	32679733	three_prime_UTR;RBBP4;protein_coding;ENSG00000162521.19	25.8489	+
chr1	32679737	32679746	three_prime_UTR;RBBP4;protein_coding;ENSG00000162521.19	50.7669	+
chr1	32679762	32679771	three_prime_UTR;RBBP4;protein_coding;ENSG00000162521.19	100.611	+
chr1	32679787	32679796	three_prime_UTR;RBBP4;protein_coding;ENSG00000162521.19	27.4392	+
chr1	32679951	32679960	three_prime_UTR;RBBP4;protein_coding;ENSG00000162521.19	16.2059	+
chr1	32680086	32680095	three_prime_UTR;RBBP4;protein_coding;ENSG00000162521.19	3.72166	+
chr1	32680105	32680114	three_prime_UTR;RBBP4;protein_coding;ENSG00000162521.19	172.524	+
chr1	32680127	32680136	three_prime_UTR;RBBP4;protein_coding;ENSG00000162521.19	41.4892	+
chr1	32680143	32680152	three_prime_UTR;RBBP4;protein_coding;ENSG00000162521.19	88.122	+
chr1	32680156	32680165	three_prime_UTR;RBBP4;protein_coding;ENSG00000162521.19	38.7308	+
chr1	32680308	32680317	three_prime_UTR;RBBP4;protein_coding;ENSG00000162521.19	3.27978	+
chr1	32680319	32680328	three_prime_UTR;RBBP4;protein_coding;ENSG00000162521.19	37.3375	+
chr1	32680391	32680400	three_prime_UTR;RBBP4;protein_coding;ENSG00000162521.19	10.4665	+
chr1	32680407	32680416	three_prime_UTR;RBBP4;protein_coding;ENSG00000162521.19	133.544	+
chr1	32680516	32680525	three_prime_UTR;RBBP4;protein_coding;ENSG00000162521.19	11.3456	+
chr1	32680542	32680551	three_prime_UTR;RBBP4;protein_coding;ENSG00000162521.19	16.7727	+
chr1	32680574	32680583	three_prime_UTR;RBBP4;protein_coding;ENSG00000162521.19	43.4335	+
chr1	32686047	32686056	three_prime_UTR;RBBP4;protein_coding;ENSG00000162521.19	100.532	+
chr1	32686106	32686115	three_prime_UTR;RBBP4;protein_coding;ENSG00000162521.19	52.5664	+
chr1	33010385	33010394	three_prime_UTR;AK2;protein_coding;ENSG00000004455.18	14.2691	-
chr1	33010408	33010417	three_prime_UTR;AK2;protein_coding;ENSG00000004455.18	9.15931	-
chr1	33010424	33010433	three_prime_UTR;AK2;protein_coding;ENSG00000004455.18	36.0864	-
chr1	33010444	33010453	three_prime_UTR;AK2;protein_coding;ENSG00000004455.18	3.43434	-
chr1	33010469	33010478	three_prime_UTR;AK2;protein_coding;ENSG00000004455.18	141.953	-
chr1	33300421	33300430	three_prime_UTR;ZNF362;protein_coding;ENSG00000160094.15	3.16199	+
chr1	35183676	35183685	three_prime_UTR;SFPQ;protein_coding;ENSG00000116560.12	101.006	-
chr1	35183721	35183730	three_prime_UTR;SFPQ;protein_coding;ENSG00000116560.12	20.1783	-
chr1	35183734	35183743	three_prime_UTR;SFPQ;protein_coding;ENSG00000116560.12	4.74013	-
chr1	35183759	35183768	three_prime_UTR;SFPQ;protein_coding;ENSG00000116560.12	2.28554	-
chr1	35183770	35183779	three_prime_UTR;SFPQ;protein_coding;ENSG00000116560.12	4.00037	-
chr1	35183796	35183805	three_prime_UTR;SFPQ;protein_coding;ENSG00000116560.12	23.0314	-
chr1	35183874	35183883	three_prime_UTR;SFPQ;protein_coding;ENSG00000116560.12	32.6245	-
chr1	35183955	35183964	three_prime_UTR;SFPQ;protein_coding;ENSG00000116560.12	128.211	-
chr1	35183965	35183974	three_prime_UTR;SFPQ;protein_coding;ENSG00000116560.12	248.155	-
chr1	35183987	35183996	three_prime_UTR;SFPQ;protein_coding;ENSG00000116560.12	100.791	-
chr1	35184003	35184012	three_prime_UTR;SFPQ;protein_coding;ENSG00000116560.12	49.5082	-
chr1	35184062	35184071	three_prime_UTR;SFPQ;protein_coding;ENSG00000116560.12	60.1953	-
chr1	35184077	35184086	three_prime_UTR;SFPQ;protein_coding;ENSG00000116560.12	18.4804	-
chr1	35184207	35184216	three_prime_UTR;SFPQ;protein_coding;ENSG00000116560.12	715.018	-
chr1	35184232	35184241	three_prime_UTR;SFPQ;protein_coding;ENSG00000116560.12	79.3432	-
chr1	35184409	35184418	three_prime_UTR;SFPQ;protein_coding;ENSG00000116560.12	1049.18	-
chr1	35184421	35184430	three_prime_UTR;SFPQ;protein_coding;ENSG00000116560.12	205.244	-
chr1	35184441	35184450	three_prime_UTR;SFPQ;protein_coding;ENSG00000116560.12	246.355	-
chr1	35187081	35187090	CDS;SFPQ;protein_coding;ENSG00000116560.12	96.4784	-
chr1	35187092	35187101	CDS;SFPQ;protein_coding;ENSG00000116560.12	317.432	-
chr1	35187102	35187111	CDS;SFPQ;protein_coding;ENSG00000116560.12	34.3718	-
chr1	35187118	35187127	CDS;SFPQ;protein_coding;ENSG00000116560.12	57.1686	-
chr1	35187203	35187212	CDS;SFPQ;protein_coding;ENSG00000116560.12	18.8948	-
chr1	35190804	35190813	CDS;SFPQ;protein_coding;ENSG00000116560.12	129.508	-
chr1	35190853	35190862	CDS;SFPQ;protein_coding;ENSG00000116560.12	106.551	-
chr1	35190866	35190875	CDS;SFPQ;protein_coding;ENSG00000116560.12	305.851	-
chr1	35190903	35190912	CDS;SFPQ;protein_coding;ENSG00000116560.12	33.441	-
chr1	35375107	35375116	intron;ZMYM4;protein_coding;ENSG00000146463.12	7.62704	+
chr1	35375167	35375176	intron;ZMYM4;protein_coding;ENSG00000146463.12	3.79096	+
chr1	35609397	35609406	five_prime_UTR;PSMB2;protein_coding;ENSG00000126067.12	31.4876	-
chr1	35631278	35631287	five_prime_UTR;PSMB2;protein_coding;ENSG00000126067.12	1.49555	-
chr1	35631293	35631302	five_prime_UTR;PSMB2;protein_coding;ENSG00000126067.12	6.10242	-
chr1	35631306	35631315	five_prime_UTR;PSMB2;protein_coding;ENSG00000126067.12	18.7952	-
chr1	35631330	35631339	five_prime_UTR;PSMB2;protein_coding;ENSG00000126067.12	146.507	-
chr1	35636394	35636403	CDS;PSMB2;protein_coding;ENSG00000126067.12	392.061	-
chr1	35636412	35636421	CDS;PSMB2;protein_coding;ENSG00000126067.12	54.2474	-
chr1	35641347	35641356	CDS;PSMB2;protein_coding;ENSG00000126067.12	50.7321	-
chr1	36180558	36180567	three_prime_UTR;MAP7D1;protein_coding;ENSG00000116871.16	0.168466	+
chr1	36180581	36180590	three_prime_UTR;MAP7D1;protein_coding;ENSG00000116871.16	7.70321	+
chr1	36304462	36304471	three_prime_UTR;THRAP3;protein_coding;ENSG00000054118.15	72.8558	+
chr1	36304494	36304503	three_prime_UTR;THRAP3;protein_coding;ENSG00000054118.15	12.2557	+
chr1	36305083	36305092	three_prime_UTR;THRAP3;protein_coding;ENSG00000054118.15	75.1908	+
chr1	36305132	36305141	three_prime_UTR;THRAP3;protein_coding;ENSG00000054118.15	20.4767	+
chr1	36305153	36305162	three_prime_UTR;THRAP3;protein_coding;ENSG00000054118.15	16.0411	+
chr1	37483796	37483805	three_prime_UTR;ZC3H12A;protein_coding;ENSG00000163874.11	61.3414	+
chr1	37483810	37483819	three_prime_UTR;ZC3H12A;protein_coding;ENSG00000163874.11	35.9093	+
chr1	37483831	37483840	three_prime_UTR;ZC3H12A;protein_coding;ENSG00000163874.11	76.907	+
chr1	37483858	37483867	three_prime_UTR;ZC3H12A;protein_coding;ENSG00000163874.11	310.411	+
chr1	37483914	37483923	three_prime_UTR;ZC3H12A;protein_coding;ENSG00000163874.11	107.294	+
chr1	37483950	37483959	three_prime_UTR;ZC3H12A;protein_coding;ENSG00000163874.11	191.489	+
chr1	37483979	37483988	three_prime_UTR;ZC3H12A;protein_coding;ENSG00000163874.11	42.6156	+
chr1	37484009	37484018	three_prime_UTR;ZC3H12A;protein_coding;ENSG00000163874.11	277.77	+
chr1	37484025	37484034	three_prime_UTR;ZC3H12A;protein_coding;ENSG00000163874.11	80.7699	+
chr1	37484049	37484058	three_prime_UTR;ZC3H12A;protein_coding;ENSG00000163874.11	63.6636	+
chr1	37484061	37484070	three_prime_UTR;ZC3H12A;protein_coding;ENSG00000163874.11	203.66	+
chr1	37484082	37484091	three_prime_UTR;ZC3H12A;protein_coding;ENSG00000163874.11	179.429	+
chr1	37484093	37484102	three_prime_UTR;ZC3H12A;protein_coding;ENSG00000163874.11	28.1062	+
chr1	37484115	37484124	three_prime_UTR;ZC3H12A;protein_coding;ENSG00000163874.11	21.6594	+
chr1	37484132	37484141	three_prime_UTR;ZC3H12A;protein_coding;ENSG00000163874.11	25.9	+
chr1	37484213	37484222	three_prime_UTR;ZC3H12A;protein_coding;ENSG00000163874.11	6.53937	+
chr1	37484230	37484239	three_prime_UTR;ZC3H12A;protein_coding;ENSG00000163874.11	61.047	+
chr1	37484254	37484263	three_prime_UTR;ZC3H12A;protein_coding;ENSG00000163874.11	14.5251	+
chr1	37484278	37484287	three_prime_UTR;ZC3H12A;protein_coding;ENSG00000163874.11	60.0345	+
chr1	37484306	37484315	three_prime_UTR;ZC3H12A;protein_coding;ENSG00000163874.11	12.6778	+
chr1	37493594	37493603	three_prime_UTR;MEAF6;protein_coding;ENSG00000163875.16	16.9192	-
chr1	37493605	37493614	three_prime_UTR;MEAF6;protein_coding;ENSG00000163875.16	12.0044	-
chr1	37493622	37493631	three_prime_UTR;MEAF6;protein_coding;ENSG00000163875.16	50.7257	-
chr1	37493632	37493641	three_prime_UTR;MEAF6;protein_coding;ENSG00000163875.16	36.1738	-
chr1	37493646	37493655	three_prime_UTR;MEAF6;protein_coding;ENSG00000163875.16	1.18738	-
chr1	37493663	37493672	three_prime_UTR;MEAF6;protein_coding;ENSG00000163875.16	33.791	-
chr1	37493674	37493683	three_prime_UTR;MEAF6;protein_coding;ENSG00000163875.16	20.7876	-
chr1	37709549	37709558	three_prime_UTR;CDCA8;protein_coding;ENSG00000134690.11	15.6821	+
chr1	37709581	37709590	three_prime_UTR;CDCA8;protein_coding;ENSG00000134690.11	25.4418	+
chr1	37709592	37709601	three_prime_UTR;CDCA8;protein_coding;ENSG00000134690.11	54.7786	+
chr1	37709610	37709619	three_prime_UTR;CDCA8;protein_coding;ENSG00000134690.11	6.71408	+
chr1	37709658	37709667	three_prime_UTR;CDCA8;protein_coding;ENSG00000134690.11	4.3229	+
chr1	37803605	37803614	three_prime_UTR;YRDC;protein_coding;ENSG00000196449.4	11.8108	-
chr1	37803637	37803646	three_prime_UTR;YRDC;protein_coding;ENSG00000196449.4	241.556	-
chr1	37803648	37803657	three_prime_UTR;YRDC;protein_coding;ENSG00000196449.4	963.995	-
chr1	37803675	37803684	three_prime_UTR;YRDC;protein_coding;ENSG00000196449.4	75.07	-
chr1	38838564	38838573	three_prime_UTR;RRAGC;protein_coding;ENSG00000116954.8	185.324	-
chr1	39004429	39004438	three_prime_UTR;AKIRIN1;protein_coding;ENSG00000174574.16	9.59826	+
chr1	39005420	39005429	three_prime_UTR;AKIRIN1;protein_coding;ENSG00000174574.16	264.684	+
chr1	39005443	39005452	three_prime_UTR;AKIRIN1;protein_coding;ENSG00000174574.16	293.707	+
chr1	39005463	39005472	three_prime_UTR;AKIRIN1;protein_coding;ENSG00000174574.16	91.7171	+
chr1	39005475	39005484	three_prime_UTR;AKIRIN1;protein_coding;ENSG00000174574.16	35.0238	+
chr1	39005620	39005629	three_prime_UTR;AKIRIN1;protein_coding;ENSG00000174574.16	4.69747	+
chr1	39005735	39005744	three_prime_UTR;AKIRIN1;protein_coding;ENSG00000174574.16	2.49871	+
chr1	39485907	39485916	three_prime_UTR;MACF1;protein_coding;ENSG00000127603.32	11.9843	+
chr1	39485963	39485972	three_prime_UTR;MACF1;protein_coding;ENSG00000127603.32	30.3342	+
chr1	39485977	39485986	three_prime_UTR;MACF1;protein_coding;ENSG00000127603.32	69.1758	+
chr1	39486110	39486119	three_prime_UTR;MACF1;protein_coding;ENSG00000127603.32	20.9104	+
chr1	39486125	39486134	three_prime_UTR;MACF1;protein_coding;ENSG00000127603.32	170.961	+
chr1	39560907	39560916	three_prime_UTR;PABPC4;protein_coding;ENSG00000090621.15	30.0691	-
chr1	39560985	39560994	three_prime_UTR;PABPC4;protein_coding;ENSG00000090621.15	54.4778	-
chr1	39561000	39561009	three_prime_UTR;PABPC4;protein_coding;ENSG00000090621.15	45.3007	-
chr1	39561030	39561039	three_prime_UTR;PABPC4;protein_coding;ENSG00000090621.15	38.0535	-
chr1	39865885	39865894	intron;TRIT1;protein_coding;ENSG00000043514.17	34.5611	-
chr1	39865898	39865907	intron;TRIT1;protein_coding;ENSG00000043514.17	2.53818	-
chr1	39865927	39865936	intron;TRIT1;protein_coding;ENSG00000043514.17	4.11503	-
chr1	40071607	40071616	three_prime_UTR;CAP1;protein_coding;ENSG00000131236.18	11.1344	+
chr1	40071617	40071626	three_prime_UTR;CAP1;protein_coding;ENSG00000131236.18	86.2389	+
chr1	40071674	40071683	three_prime_UTR;CAP1;protein_coding;ENSG00000131236.18	18.8199	+
chr1	40071691	40071700	three_prime_UTR;CAP1;protein_coding;ENSG00000131236.18	43.9207	+
chr1	40071722	40071731	three_prime_UTR;CAP1;protein_coding;ENSG00000131236.18	4.273	+
chr1	40071743	40071752	three_prime_UTR;CAP1;protein_coding;ENSG00000131236.18	1.91168	+
chr1	40071775	40071784	three_prime_UTR;CAP1;protein_coding;ENSG00000131236.18	20.2355	+
chr1	40071808	40071817	three_prime_UTR;CAP1;protein_coding;ENSG00000131236.18	41.2668	+
chr1	40071869	40071878	three_prime_UTR;CAP1;protein_coding;ENSG00000131236.18	6.87551	+
chr1	40071888	40071897	three_prime_UTR;CAP1;protein_coding;ENSG00000131236.18	1.6003	+
chr1	40071984	40071993	three_prime_UTR;CAP1;protein_coding;ENSG00000131236.18	23.7694	+
chr1	40072060	40072069	three_prime_UTR;CAP1;protein_coding;ENSG00000131236.18	11.5456	+
chr1	40072092	40072101	three_prime_UTR;CAP1;protein_coding;ENSG00000131236.18	17.3737	+
chr1	40072149	40072158	three_prime_UTR;CAP1;protein_coding;ENSG00000131236.18	2.49859	+
chr1	40072161	40072170	three_prime_UTR;CAP1;protein_coding;ENSG00000131236.18	21.4208	+
chr1	40072174	40072183	three_prime_UTR;CAP1;protein_coding;ENSG00000131236.18	29.9866	+
chr1	40072194	40072203	three_prime_UTR;CAP1;protein_coding;ENSG00000131236.18	8.13977	+
chr1	40072348	40072357	three_prime_UTR;CAP1;protein_coding;ENSG00000131236.18	12.5118	+
chr1	40072365	40072374	three_prime_UTR;CAP1;protein_coding;ENSG00000131236.18	1.58814	+
chr1	40072395	40072404	three_prime_UTR;CAP1;protein_coding;ENSG00000131236.18	16.9859	+
chr1	40072410	40072419	three_prime_UTR;CAP1;protein_coding;ENSG00000131236.18	33.9692	+
chr1	40072425	40072434	three_prime_UTR;CAP1;protein_coding;ENSG00000131236.18	19.7038	+
chr1	40072487	40072496	three_prime_UTR;CAP1;protein_coding;ENSG00000131236.18	6.30886	+
chr1	40072520	40072529	three_prime_UTR;CAP1;protein_coding;ENSG00000131236.18	10.3076	+
chr1	40072558	40072567	three_prime_UTR;CAP1;protein_coding;ENSG00000131236.18	42.9322	+
chr1	40072568	40072577	three_prime_UTR;CAP1;protein_coding;ENSG00000131236.18	19.7149	+
chr1	40422287	40422296	three_prime_UTR;SMAP2;protein_coding;ENSG00000084070.12	36.4474	+
chr1	40422298	40422307	three_prime_UTR;SMAP2;protein_coding;ENSG00000084070.12	12.7264	+
chr1	40422907	40422916	three_prime_UTR;SMAP2;protein_coding;ENSG00000084070.12	67.3383	+
chr1	40422917	40422926	three_prime_UTR;SMAP2;protein_coding;ENSG00000084070.12	25.3797	+
chr1	40422960	40422969	three_prime_UTR;SMAP2;protein_coding;ENSG00000084070.12	44.3111	+
chr1	40422971	40422980	three_prime_UTR;SMAP2;protein_coding;ENSG00000084070.12	5.11838	+
chr1	40423000	40423009	three_prime_UTR;SMAP2;protein_coding;ENSG00000084070.12	26.4502	+
chr1	40423026	40423035	three_prime_UTR;SMAP2;protein_coding;ENSG00000084070.12	32.346	+
chr1	40423069	40423078	three_prime_UTR;SMAP2;protein_coding;ENSG00000084070.12	3.96947	+
chr1	40423106	40423115	three_prime_UTR;SMAP2;protein_coding;ENSG00000084070.12	7.30147	+
chr1	40423118	40423127	three_prime_UTR;SMAP2;protein_coding;ENSG00000084070.12	1.83146	+
chr1	40766640	40766649	CDS;NFYC;protein_coding;ENSG00000066136.21	78.8109	+
chr1	40766650	40766659	CDS;NFYC;protein_coding;ENSG00000066136.21	33.3795	+
chr1	41011793	41011802	three_prime_UTR;CTPS1;protein_coding;ENSG00000171793.17	4.10337	+
chr1	41012326	41012335	three_prime_UTR;CTPS1;protein_coding;ENSG00000171793.17	119.77	+
chr1	41012340	41012349	three_prime_UTR;CTPS1;protein_coding;ENSG00000171793.17	23.5135	+
chr1	41012378	41012387	three_prime_UTR;CTPS1;protein_coding;ENSG00000171793.17	25.4427	+
chr1	41012404	41012413	three_prime_UTR;CTPS1;protein_coding;ENSG00000171793.17	22.7226	+
chr1	41012443	41012452	three_prime_UTR;CTPS1;protein_coding;ENSG00000171793.17	14.9614	+
chr1	41012461	41012470	three_prime_UTR;CTPS1;protein_coding;ENSG00000171793.17	10.143	+
chr1	42176749	42176758	three_prime_UTR;FOXJ3;protein_coding;ENSG00000198815.9	1.59285	-
chr1	42186495	42186504	intron;FOXJ3;protein_coding;ENSG00000198815.9	1.2346	-
chr1	42186700	42186709	intron;FOXJ3;protein_coding;ENSG00000198815.9	16.5743	-
chr1	42187329	42187338	intron;FOXJ3;protein_coding;ENSG00000198815.9	4.31906	-
chr1	42187343	42187352	intron;FOXJ3;protein_coding;ENSG00000198815.9	16.087	-
chr1	42187359	42187368	intron;FOXJ3;protein_coding;ENSG00000198815.9	9.59587	-
chr1	42187403	42187412	intron;FOXJ3;protein_coding;ENSG00000198815.9	9.89803	-
chr1	42187413	42187422	intron;FOXJ3;protein_coding;ENSG00000198815.9	11.1222	-
chr1	42187471	42187480	intron;FOXJ3;protein_coding;ENSG00000198815.9	12.4507	-
chr1	42187519	42187528	intron;FOXJ3;protein_coding;ENSG00000198815.9	2.40204	-
chr1	42187529	42187538	intron;FOXJ3;protein_coding;ENSG00000198815.9	1.37319	-
chr1	42187570	42187579	intron;FOXJ3;protein_coding;ENSG00000198815.9	11.1755	-
chr1	42187971	42187980	intron;FOXJ3;protein_coding;ENSG00000198815.9	4.71531	-
chr1	42188071	42188080	intron;FOXJ3;protein_coding;ENSG00000198815.9	24.0613	-
chr1	42188137	42188146	intron;FOXJ3;protein_coding;ENSG00000198815.9	13.2041	-
chr1	42668390	42668399	three_prime_UTR;PPIH;protein_coding;ENSG00000171960.12	1.51664	+
chr1	42668406	42668415	three_prime_UTR;PPIH;protein_coding;ENSG00000171960.12	31.5654	+
chr1	42702081	42702090	three_prime_UTR;YBX1;protein_coding;ENSG00000065978.19	82.7297	+
chr1	42702102	42702111	three_prime_UTR;YBX1;protein_coding;ENSG00000065978.19	46.4771	+
chr1	42702120	42702129	three_prime_UTR;YBX1;protein_coding;ENSG00000065978.19	83.1983	+
chr1	42926258	42926267	three_prime_UTR;SLC2A1;protein_coding;ENSG00000117394.24	31.7482	-
chr1	42926271	42926280	three_prime_UTR;SLC2A1;protein_coding;ENSG00000117394.24	11.913	-
chr1	42926572	42926581	three_prime_UTR;SLC2A1;protein_coding;ENSG00000117394.24	25.9556	-
chr1	42926603	42926612	three_prime_UTR;SLC2A1;protein_coding;ENSG00000117394.24	9.09171	-
chr1	42926627	42926636	three_prime_UTR;SLC2A1;protein_coding;ENSG00000117394.24	8.16455	-
chr1	42926640	42926649	three_prime_UTR;SLC2A1;protein_coding;ENSG00000117394.24	1.79902	-
chr1	42926663	42926672	three_prime_UTR;SLC2A1;protein_coding;ENSG00000117394.24	55.3375	-
chr1	42926675	42926684	three_prime_UTR;SLC2A1;protein_coding;ENSG00000117394.24	68.1531	-
chr1	42926693	42926702	three_prime_UTR;SLC2A1;protein_coding;ENSG00000117394.24	11.0423	-
chr1	42926721	42926730	three_prime_UTR;SLC2A1;protein_coding;ENSG00000117394.24	71.223	-
chr1	44651214	44651223	three_prime_UTR;RNF220;protein_coding;ENSG00000187147.18	27.6869	+
chr1	44775572	44775581	five_prime_UTR;RPS8;protein_coding;ENSG00000142937.12	364.162	+
chr1	44776054	44776063	CDS;RPS8;protein_coding;ENSG00000142937.12	6.09456	+
chr1	44776077	44776086	CDS;RPS8;protein_coding;ENSG00000142937.12	37.372	+
chr1	44776088	44776097	CDS;RPS8;protein_coding;ENSG00000142937.12	29.0387	+
chr1	44776102	44776111	CDS;RPS8;protein_coding;ENSG00000142937.12	53.5943	+
chr1	44776528	44776537	intron;RPS8;protein_coding;ENSG00000142937.12	76.9386	+
chr1	44776540	44776549	intron;RPS8;protein_coding;ENSG00000142937.12	1.69537	+
chr1	44776671	44776680	intron;RPS8;protein_coding;ENSG00000142937.12	20.9325	+
chr1	44776695	44776704	CDS;RPS8;protein_coding;ENSG00000142937.12	6.92625	+
chr1	44776716	44776725	CDS;RPS8;protein_coding;ENSG00000142937.12	132.098	+
chr1	44776748	44776757	CDS;RPS8;protein_coding;ENSG00000142937.12	18.8912	+
chr1	44776764	44776773	CDS;RPS8;protein_coding;ENSG00000142937.12	24.316	+
chr1	44777629	44777638	CDS;RPS8;protein_coding;ENSG00000142937.12	71.6398	+
chr1	44777644	44777653	CDS;RPS8;protein_coding;ENSG00000142937.12	43.0275	+
chr1	44777658	44777667	CDS;RPS8;protein_coding;ENSG00000142937.12	100.731	+
chr1	44777673	44777682	CDS;RPS8;protein_coding;ENSG00000142937.12	32.1239	+
chr1	44777693	44777702	CDS;RPS8;protein_coding;ENSG00000142937.12	5.04173	+
chr1	44777728	44777737	CDS;RPS8;protein_coding;ENSG00000142937.12	15.2447	+
chr1	44777745	44777754	CDS;RPS8;protein_coding;ENSG00000142937.12	57.0344	+
chr1	44777835	44777844	intron;RPS8;protein_coding;ENSG00000142937.12	70.958	+
chr1	44778015	44778024	CDS;RPS8;protein_coding;ENSG00000142937.12	64.9676	+
chr1	44778041	44778050	CDS;RPS8;protein_coding;ENSG00000142937.12	3.01802	+
chr1	44778053	44778062	CDS;RPS8;protein_coding;ENSG00000142937.12	11.3476	+
chr1	44778102	44778111	CDS;RPS8;protein_coding;ENSG00000142937.12	217.082	+
chr1	44778384	44778393	exon;RPS8;protein_coding;ENSG00000142937.12	200.86	+
chr1	44778584	44778593	CDS;RPS8;protein_coding;ENSG00000142937.12	56.2972	+
chr1	44778594	44778603	CDS;RPS8;protein_coding;ENSG00000142937.12	20.8382	+
chr1	44778607	44778616	CDS;RPS8;protein_coding;ENSG00000142937.12	24.7684	+
chr1	44778629	44778638	CDS;RPS8;protein_coding;ENSG00000142937.12	12.2276	+
chr1	44814079	44814088	three_prime_UTR;BTBD19;protein_coding;ENSG00000222009.9	45.9296	+
chr1	44814212	44814221	three_prime_UTR;BTBD19;protein_coding;ENSG00000222009.9	1.43859	+
chr1	44814252	44814261	three_prime_UTR;BTBD19;protein_coding;ENSG00000222009.9	16.7187	+
chr1	44814262	44814271	three_prime_UTR;BTBD19;protein_coding;ENSG00000222009.9	26.5501	+
chr1	44814284	44814293	three_prime_UTR;BTBD19;protein_coding;ENSG00000222009.9	13.9695	+
chr1	44814307	44814316	three_prime_UTR;BTBD19;protein_coding;ENSG00000222009.9	18.7066	+
chr1	44819939	44819948	three_prime_UTR;PTCH2;protein_coding;ENSG00000117425.14	62.883	-
chr1	44819950	44819959	three_prime_UTR;PTCH2;protein_coding;ENSG00000117425.14	420.733	-
chr1	45511129	45511138	three_prime_UTR;PRDX1;protein_coding;ENSG00000117450.15	123.19	-
chr1	45511204	45511213	three_prime_UTR;PRDX1;protein_coding;ENSG00000117450.15	10.8332	-
chr1	45511245	45511254	three_prime_UTR;PRDX1;protein_coding;ENSG00000117450.15	29.9787	-
chr1	45511264	45511273	three_prime_UTR;PRDX1;protein_coding;ENSG00000117450.15	2.42509	-
chr1	45584110	45584119	five_prime_UTR;NASP;protein_coding;ENSG00000132780.17	14.866	+
chr1	45627609	45627618	three_prime_UTR;GPBP1L1;protein_coding;ENSG00000159592.11	5.94531	-
chr1	45627648	45627657	three_prime_UTR;GPBP1L1;protein_coding;ENSG00000159592.11	92.633	-
chr1	45627662	45627671	three_prime_UTR;GPBP1L1;protein_coding;ENSG00000159592.11	422.449	-
chr1	45627672	45627681	three_prime_UTR;GPBP1L1;protein_coding;ENSG00000159592.11	2.31793	-
chr1	45627683	45627692	three_prime_UTR;GPBP1L1;protein_coding;ENSG00000159592.11	16.0856	-
chr1	45627715	45627724	three_prime_UTR;GPBP1L1;protein_coding;ENSG00000159592.11	12.0558	-
chr1	45627840	45627849	three_prime_UTR;GPBP1L1;protein_coding;ENSG00000159592.11	77.3477	-
chr1	45627852	45627861	three_prime_UTR;GPBP1L1;protein_coding;ENSG00000159592.11	3.16324	-
chr1	46189150	46189159	three_prime_UTR;POMGNT1;protein_coding;ENSG00000085998.15	19.4218	-
chr1	46189187	46189196	three_prime_UTR;POMGNT1;protein_coding;ENSG00000085998.15	38.2036	-
chr1	46189213	46189222	three_prime_UTR;POMGNT1;protein_coding;ENSG00000085998.15	34.054	-
chr1	46278677	46278686	three_prime_UTR;LRRC41;protein_coding;ENSG00000132128.18	8.36449	-
chr1	46278730	46278739	three_prime_UTR;LRRC41;protein_coding;ENSG00000132128.18	2.03257	-
chr1	46316663	46316672	three_prime_UTR;UQCRH;protein_coding;ENSG00000173660.12	40.0988	+
chr1	46574951	46574960	three_prime_UTR;MKNK1;protein_coding;ENSG00000079277.22	12.4519	-
chr1	46574990	46574999	three_prime_UTR;MKNK1;protein_coding;ENSG00000079277.22	8.94031	-
chr1	46575000	46575009	three_prime_UTR;MKNK1;protein_coding;ENSG00000079277.22	5.39159	-
chr1	46675305	46675314	three_prime_UTR;EFCAB14;protein_coding;ENSG00000159658.15	38.0323	-
chr1	46675323	46675332	three_prime_UTR;EFCAB14;protein_coding;ENSG00000159658.15	419.765	-
chr1	46675333	46675342	three_prime_UTR;EFCAB14;protein_coding;ENSG00000159658.15	352.622	-
chr1	46675351	46675360	three_prime_UTR;EFCAB14;protein_coding;ENSG00000159658.15	83.9871	-
chr1	46675387	46675396	three_prime_UTR;EFCAB14;protein_coding;ENSG00000159658.15	787.349	-
chr1	46675398	46675407	three_prime_UTR;EFCAB14;protein_coding;ENSG00000159658.15	11.609	-
chr1	46675864	46675873	three_prime_UTR;EFCAB14;protein_coding;ENSG00000159658.15	11.4899	-
chr1	46675899	46675908	three_prime_UTR;EFCAB14;protein_coding;ENSG00000159658.15	7.85684	-
chr1	46675929	46675938	three_prime_UTR;EFCAB14;protein_coding;ENSG00000159658.15	64.3431	-
chr1	46675962	46675971	three_prime_UTR;EFCAB14;protein_coding;ENSG00000159658.15	1.13148	-
chr1	46676017	46676026	three_prime_UTR;EFCAB14;protein_coding;ENSG00000159658.15	26.7716	-
chr1	46676027	46676036	three_prime_UTR;EFCAB14;protein_coding;ENSG00000159658.15	34.7237	-
chr1	46676250	46676259	three_prime_UTR;EFCAB14;protein_coding;ENSG00000159658.15	10.7632	-
chr1	46676306	46676315	three_prime_UTR;EFCAB14;protein_coding;ENSG00000159658.15	32.7686	-
chr1	46676316	46676325	three_prime_UTR;EFCAB14;protein_coding;ENSG00000159658.15	49.9299	-
chr1	46676384	46676393	three_prime_UTR;EFCAB14;protein_coding;ENSG00000159658.15	33.2421	-
chr1	46676402	46676411	three_prime_UTR;EFCAB14;protein_coding;ENSG00000159658.15	15.2806	-
chr1	46676435	46676444	three_prime_UTR;EFCAB14;protein_coding;ENSG00000159658.15	10.3793	-
chr1	46676449	46676458	three_prime_UTR;EFCAB14;protein_coding;ENSG00000159658.15	11.6973	-
chr1	46676520	46676529	three_prime_UTR;EFCAB14;protein_coding;ENSG00000159658.15	6.40669	-
chr1	46676561	46676570	three_prime_UTR;EFCAB14;protein_coding;ENSG00000159658.15	2.10364	-
chr1	46676599	46676608	three_prime_UTR;EFCAB14;protein_coding;ENSG00000159658.15	18.1797	-
chr1	46676627	46676636	three_prime_UTR;EFCAB14;protein_coding;ENSG00000159658.15	109.659	-
chr1	46676758	46676767	three_prime_UTR;EFCAB14;protein_coding;ENSG00000159658.15	1.67566	-
chr1	46676768	46676777	three_prime_UTR;EFCAB14;protein_coding;ENSG00000159658.15	23.782	-
chr1	46677937	46677946	three_prime_UTR;EFCAB14;protein_coding;ENSG00000159658.15	11.5326	-
chr1	46678008	46678017	three_prime_UTR;EFCAB14;protein_coding;ENSG00000159658.15	36.9201	-
chr1	46678018	46678027	three_prime_UTR;EFCAB14;protein_coding;ENSG00000159658.15	4.18524	-
chr1	46678069	46678078	three_prime_UTR;EFCAB14;protein_coding;ENSG00000159658.15	1.28776	-
chr1	46678084	46678093	three_prime_UTR;EFCAB14;protein_coding;ENSG00000159658.15	19.1564	-
chr1	46678097	46678106	three_prime_UTR;EFCAB14;protein_coding;ENSG00000159658.15	7.08429	-
chr1	46678172	46678181	three_prime_UTR;EFCAB14;protein_coding;ENSG00000159658.15	12.765	-
chr1	46678187	46678196	three_prime_UTR;EFCAB14;protein_coding;ENSG00000159658.15	46.9888	-
chr1	46678280	46678289	three_prime_UTR;EFCAB14;protein_coding;ENSG00000159658.15	6.09554	-
chr1	46678332	46678341	three_prime_UTR;EFCAB14;protein_coding;ENSG00000159658.15	15.9483	-
chr1	47377044	47377053	three_prime_UTR;CMPK1;protein_coding;ENSG00000162368.14	29.4724	+
chr1	47378115	47378124	three_prime_UTR;CMPK1;protein_coding;ENSG00000162368.14	42.8359	+
chr1	47378133	47378142	three_prime_UTR;CMPK1;protein_coding;ENSG00000162368.14	42.3265	+
chr1	47378189	47378198	three_prime_UTR;CMPK1;protein_coding;ENSG00000162368.14	11.2277	+
chr1	50471885	50471894	intron;FAF1;protein_coding;ENSG00000185104.21	18.9957	-
chr1	50471930	50471939	intron;FAF1;protein_coding;ENSG00000185104.21	5.50641	-
chr1	52088327	52088336	three_prime_UTR;BTF3L4;protein_coding;ENSG00000134717.18	74.8775	+
chr1	52423482	52423491	three_prime_UTR;TUT4;protein_coding;ENSG00000134744.14	37.0928	-
chr1	52423615	52423624	three_prime_UTR;TUT4;protein_coding;ENSG00000134744.14	45.6429	-
chr1	52423628	52423637	three_prime_UTR;TUT4;protein_coding;ENSG00000134744.14	8.79791	-
chr1	52423661	52423670	three_prime_UTR;TUT4;protein_coding;ENSG00000134744.14	249.513	-
chr1	52423678	52423687	three_prime_UTR;TUT4;protein_coding;ENSG00000134744.14	185.738	-
chr1	52423694	52423703	three_prime_UTR;TUT4;protein_coding;ENSG00000134744.14	310.254	-
chr1	52423736	52423745	three_prime_UTR;TUT4;protein_coding;ENSG00000134744.14	17.4528	-
chr1	52423776	52423785	three_prime_UTR;TUT4;protein_coding;ENSG00000134744.14	46.4127	-
chr1	52461746	52461755	CDS;TUT4;protein_coding;ENSG00000134744.14	5.21719	-
chr1	52461756	52461765	CDS;TUT4;protein_coding;ENSG00000134744.14	8.7464	-
chr1	52465098	52465107	CDS;TUT4;protein_coding;ENSG00000134744.14	14.9545	-
chr1	52465119	52465128	CDS;TUT4;protein_coding;ENSG00000134744.14	22.4139	-
chr1	52465133	52465142	CDS;TUT4;protein_coding;ENSG00000134744.14	31.2728	-
chr1	52465151	52465160	CDS;TUT4;protein_coding;ENSG00000134744.14	13.7437	-
chr1	52465170	52465179	CDS;TUT4;protein_coding;ENSG00000134744.14	4.50264	-
chr1	52468215	52468224	CDS;TUT4;protein_coding;ENSG00000134744.14	72.8826	-
chr1	52468240	52468249	CDS;TUT4;protein_coding;ENSG00000134744.14	17.0652	-
chr1	52468253	52468262	CDS;TUT4;protein_coding;ENSG00000134744.14	24.2933	-
chr1	52468264	52468273	CDS;TUT4;protein_coding;ENSG00000134744.14	68.0475	-
chr1	52468476	52468485	exon;TUT4;protein_coding;ENSG00000134744.14	12.4965	-
chr1	52472007	52472016	CDS;TUT4;protein_coding;ENSG00000134744.14	41.9818	-
chr1	52472032	52472041	CDS;TUT4;protein_coding;ENSG00000134744.14	50.5509	-
chr1	52472087	52472096	CDS;TUT4;protein_coding;ENSG00000134744.14	1828.58	-
chr1	52826338	52826347	three_prime_UTR;ZYG11B;protein_coding;ENSG00000162378.13	35.5121	+
chr1	52826360	52826369	three_prime_UTR;ZYG11B;protein_coding;ENSG00000162378.13	7.56581	+
chr1	53051067	53051076	three_prime_UTR;SCP2;protein_coding;ENSG00000116171.19	64.2627	+
chr1	53051091	53051100	three_prime_UTR;SCP2;protein_coding;ENSG00000116171.19	42.6406	+
chr1	53051104	53051113	three_prime_UTR;SCP2;protein_coding;ENSG00000116171.19	110.048	+
chr1	53051122	53051131	three_prime_UTR;SCP2;protein_coding;ENSG00000116171.19	95.4801	+
chr1	53051133	53051142	three_prime_UTR;SCP2;protein_coding;ENSG00000116171.19	49.1998	+
chr1	53051506	53051515	three_prime_UTR;SCP2;protein_coding;ENSG00000116171.19	18.1579	+
chr1	53051524	53051533	three_prime_UTR;SCP2;protein_coding;ENSG00000116171.19	10.6446	+
chr1	53952313	53952322	CDS;LRRC42;protein_coding;ENSG00000116212.15	131.694	+
chr1	53952375	53952384	CDS;LRRC42;protein_coding;ENSG00000116212.15	3.65952	+
chr1	55066505	55066514	three_prime_UTR;USP24;protein_coding;ENSG00000162402.14	41.0124	-
chr1	55066533	55066542	three_prime_UTR;USP24;protein_coding;ENSG00000162402.14	50.4171	-
chr1	55066559	55066568	three_prime_UTR;USP24;protein_coding;ENSG00000162402.14	7.61258	-
chr1	55066585	55066594	three_prime_UTR;USP24;protein_coding;ENSG00000162402.14	14.0751	-
chr1	55066782	55066791	three_prime_UTR;USP24;protein_coding;ENSG00000162402.14	4.79341	-
chr1	55066834	55066843	three_prime_UTR;USP24;protein_coding;ENSG00000162402.14	68.223	-
chr1	55066853	55066862	three_prime_UTR;USP24;protein_coding;ENSG00000162402.14	11.5384	-
chr1	55066863	55066872	three_prime_UTR;USP24;protein_coding;ENSG00000162402.14	5.12839	-
chr1	55066896	55066905	three_prime_UTR;USP24;protein_coding;ENSG00000162402.14	5.85305	-
chr1	55067039	55067048	three_prime_UTR;USP24;protein_coding;ENSG00000162402.14	29.7434	-
chr1	55067116	55067125	three_prime_UTR;USP24;protein_coding;ENSG00000162402.14	30.1861	-
chr1	55067132	55067141	three_prime_UTR;USP24;protein_coding;ENSG00000162402.14	85.4783	-
chr1	55067142	55067151	three_prime_UTR;USP24;protein_coding;ENSG00000162402.14	222.186	-
chr1	55067155	55067164	three_prime_UTR;USP24;protein_coding;ENSG00000162402.14	181.509	-
chr1	55067198	55067207	three_prime_UTR;USP24;protein_coding;ENSG00000162402.14	17.221	-
chr1	55067220	55067229	three_prime_UTR;USP24;protein_coding;ENSG00000162402.14	27.8608	-
chr1	55067721	55067730	three_prime_UTR;USP24;protein_coding;ENSG00000162402.14	10.9995	-
chr1	55067744	55067753	three_prime_UTR;USP24;protein_coding;ENSG00000162402.14	21.3897	-
chr1	55067764	55067773	three_prime_UTR;USP24;protein_coding;ENSG00000162402.14	22.0008	-
chr1	55067777	55067786	three_prime_UTR;USP24;protein_coding;ENSG00000162402.14	11.0782	-
chr1	55067794	55067803	three_prime_UTR;USP24;protein_coding;ENSG00000162402.14	8.22483	-
chr1	55070610	55070619	intron;USP24;protein_coding;ENSG00000162402.14	48.2957	-
chr1	55070655	55070664	intron;USP24;protein_coding;ENSG00000162402.14	50.1178	-
chr1	58654950	58654959	three_prime_UTR;MYSM1;protein_coding;ENSG00000162601.11	1.87192	-
chr1	61692214	61692223	intron;TM2D1;protein_coding;ENSG00000162604.12	21.8573	-
chr1	61692410	61692419	intron;TM2D1;protein_coding;ENSG00000162604.12	18.9514	-
chr1	61692428	61692437	intron;TM2D1;protein_coding;ENSG00000162604.12	24.2946	-
chr1	61692482	61692491	intron;TM2D1;protein_coding;ENSG00000162604.12	54.8478	-
chr1	61692531	61692540	intron;TM2D1;protein_coding;ENSG00000162604.12	7.56067	-
chr1	61692548	61692557	intron;TM2D1;protein_coding;ENSG00000162604.12	6.33433	-
chr1	61692572	61692581	intron;TM2D1;protein_coding;ENSG00000162604.12	8.033	-
chr1	61692590	61692599	intron;TM2D1;protein_coding;ENSG00000162604.12	20.9342	-
chr1	61692621	61692630	intron;TM2D1;protein_coding;ENSG00000162604.12	15.7998	-
chr1	62451361	62451370	three_prime_UTR;USP1;protein_coding;ENSG00000162607.13	82.2163	+
chr1	62451432	62451441	three_prime_UTR;USP1;protein_coding;ENSG00000162607.13	20.1807	+
chr1	62451592	62451601	three_prime_UTR;USP1;protein_coding;ENSG00000162607.13	26.722	+
chr1	62451619	62451628	three_prime_UTR;USP1;protein_coding;ENSG00000162607.13	17.2576	+
chr1	62451641	62451650	three_prime_UTR;USP1;protein_coding;ENSG00000162607.13	20.3121	+
chr1	62451651	62451660	three_prime_UTR;USP1;protein_coding;ENSG00000162607.13	18.2219	+
chr1	62864255	62864264	three_prime_UTR;ATG4C;protein_coding;ENSG00000125703.15	158.378	+
chr1	63411994	63412003	three_prime_UTR;ALG6;protein_coding;ENSG00000088035.18	175.398	+
chr1	63412020	63412029	three_prime_UTR;ALG6;protein_coding;ENSG00000088035.18	161.244	+
chr1	63412050	63412059	three_prime_UTR;ALG6;protein_coding;ENSG00000088035.18	278.664	+
chr1	63414084	63414093	three_prime_UTR;ALG6;protein_coding;ENSG00000088035.18	17.7547	+
chr1	63414113	63414122	three_prime_UTR;ALG6;protein_coding;ENSG00000088035.18	86.37	+
chr1	63414134	63414143	three_prime_UTR;ALG6;protein_coding;ENSG00000088035.18	7.39116	+
chr1	63415871	63415880	three_prime_UTR;ALG6;protein_coding;ENSG00000088035.18	48.5811	+
chr1	63415881	63415890	three_prime_UTR;ALG6;protein_coding;ENSG00000088035.18	74.5275	+
chr1	63415897	63415906	three_prime_UTR;ALG6;protein_coding;ENSG00000088035.18	23.406	+
chr1	63415946	63415955	three_prime_UTR;ALG6;protein_coding;ENSG00000088035.18	70.9764	+
chr1	63419366	63419375	intron;ALG6;protein_coding;ENSG00000088035.18	10.3132	+
chr1	63419421	63419430	three_prime_UTR;ALG6;protein_coding;ENSG00000088035.18	109.674	+
chr1	63428744	63428753	three_prime_UTR;ALG6;protein_coding;ENSG00000088035.18	73.1375	+
chr1	63428791	63428800	three_prime_UTR;ALG6;protein_coding;ENSG00000088035.18	60.2103	+
chr1	63428920	63428929	exon;ALG6;protein_coding;ENSG00000088035.18	51.3575	+
chr1	63428937	63428946	three_prime_UTR;ALG6;protein_coding;ENSG00000088035.18	57.4352	+
chr1	63428952	63428961	three_prime_UTR;ALG6;protein_coding;ENSG00000088035.18	15.3539	+
chr1	63429001	63429010	three_prime_UTR;ALG6;protein_coding;ENSG00000088035.18	101.51	+
chr1	63429015	63429024	three_prime_UTR;ALG6;protein_coding;ENSG00000088035.18	12.4961	+
chr1	63429029	63429038	three_prime_UTR;ALG6;protein_coding;ENSG00000088035.18	17.7575	+
chr1	63429081	63429090	three_prime_UTR;ALG6;protein_coding;ENSG00000088035.18	5.06179	+
chr1	64833309	64833318	three_prime_UTR;JAK1;protein_coding;ENSG00000162434.13	5.7645	-
chr1	64833320	64833329	three_prime_UTR;JAK1;protein_coding;ENSG00000162434.13	10.3088	-
chr1	64833331	64833340	three_prime_UTR;JAK1;protein_coding;ENSG00000162434.13	3.65292	-
chr1	64833369	64833378	three_prime_UTR;JAK1;protein_coding;ENSG00000162434.13	1.20348	-
chr1	64833391	64833400	three_prime_UTR;JAK1;protein_coding;ENSG00000162434.13	10.3967	-
chr1	64833941	64833950	three_prime_UTR;JAK1;protein_coding;ENSG00000162434.13	17.5653	-
chr1	64833953	64833962	three_prime_UTR;JAK1;protein_coding;ENSG00000162434.13	10.1427	-
chr1	64833979	64833988	three_prime_UTR;JAK1;protein_coding;ENSG00000162434.13	10.661	-
chr1	66373649	66373658	three_prime_UTR;PDE4B;protein_coding;ENSG00000184588.18	11.1996	+
chr1	66373672	66373681	three_prime_UTR;PDE4B;protein_coding;ENSG00000184588.18	32.1452	+
chr1	66373723	66373732	three_prime_UTR;PDE4B;protein_coding;ENSG00000184588.18	4.30505	+
chr1	66985451	66985460	three_prime_UTR;MIER1;protein_coding;ENSG00000198160.15	77.3443	+
chr1	66985462	66985471	three_prime_UTR;MIER1;protein_coding;ENSG00000198160.15	39.6342	+
chr1	66985487	66985496	three_prime_UTR;MIER1;protein_coding;ENSG00000198160.15	203.226	+
chr1	66985517	66985526	three_prime_UTR;MIER1;protein_coding;ENSG00000198160.15	514.436	+
chr1	66985581	66985590	three_prime_UTR;MIER1;protein_coding;ENSG00000198160.15	6.25207	+
chr1	67052777	67052786	CDS;SLC35D1;protein_coding;ENSG00000116704.8	4.34491	-
chr1	67052796	67052805	CDS;SLC35D1;protein_coding;ENSG00000116704.8	70.5667	-
chr1	67052851	67052860	CDS;SLC35D1;protein_coding;ENSG00000116704.8	33.7136	-
chr1	67052957	67052966	CDS;SLC35D1;protein_coding;ENSG00000116704.8	31.7649	-
chr1	67052970	67052979	CDS;SLC35D1;protein_coding;ENSG00000116704.8	68.2469	-
chr1	67052982	67052991	CDS;SLC35D1;protein_coding;ENSG00000116704.8	126.99	-
chr1	70221591	70221600	five_prime_UTR;SRSF11;protein_coding;ENSG00000116754.14	45.3072	+
chr1	70222497	70222506	intron;SRSF11;protein_coding;ENSG00000116754.14	9.72693	+
chr1	70222511	70222520	intron;SRSF11;protein_coding;ENSG00000116754.14	51.3053	+
chr1	70222523	70222532	intron;SRSF11;protein_coding;ENSG00000116754.14	1.34452	+
chr1	70228391	70228400	intron;SRSF11;protein_coding;ENSG00000116754.14	25.4303	+
chr1	70228404	70228413	intron;SRSF11;protein_coding;ENSG00000116754.14	61.162	+
chr1	70228426	70228435	CDS;SRSF11;protein_coding;ENSG00000116754.14	2.27276	+
chr1	70229131	70229140	intron;SRSF11;protein_coding;ENSG00000116754.14	3.45441	+
chr1	70229143	70229152	intron;SRSF11;protein_coding;ENSG00000116754.14	1.30446	+
chr1	70229153	70229162	intron;SRSF11;protein_coding;ENSG00000116754.14	7.1869	+
chr1	70229168	70229177	intron;SRSF11;protein_coding;ENSG00000116754.14	5.07331	+
chr1	70229182	70229191	intron;SRSF11;protein_coding;ENSG00000116754.14	23.9543	+
chr1	70229192	70229201	intron;SRSF11;protein_coding;ENSG00000116754.14	36.5285	+
chr1	70229350	70229359	intron;SRSF11;protein_coding;ENSG00000116754.14	36.1398	+
chr1	70229361	70229370	intron;SRSF11;protein_coding;ENSG00000116754.14	19.3701	+
chr1	70229419	70229428	intron;SRSF11;protein_coding;ENSG00000116754.14	1.07993	+
chr1	70229466	70229475	intron;SRSF11;protein_coding;ENSG00000116754.14	1.77926	+
chr1	70231064	70231073	exon;SRSF11;protein_coding;ENSG00000116754.14	4.47396	+
chr1	70231076	70231085	exon;SRSF11;protein_coding;ENSG00000116754.14	30.057	+
chr1	70231090	70231099	exon;SRSF11;protein_coding;ENSG00000116754.14	1.3655	+
chr1	70231841	70231850	exon;SRSF11;protein_coding;ENSG00000116754.14	17.1535	+
chr1	70251866	70251875	three_prime_UTR;SRSF11;protein_coding;ENSG00000116754.14	42.6734	+
chr1	70251884	70251893	three_prime_UTR;SRSF11;protein_coding;ENSG00000116754.14	60.1806	+
chr1	70251926	70251935	three_prime_UTR;SRSF11;protein_coding;ENSG00000116754.14	5.16181	+
chr1	71063563	71063572	three_prime_UTR;ZRANB2;protein_coding;ENSG00000132485.14	11.7721	-
chr1	71063838	71063847	three_prime_UTR;ZRANB2;protein_coding;ENSG00000132485.14	4.36368	-
chr1	71066848	71066857	CDS;ZRANB2;protein_coding;ENSG00000132485.14	1.17081	-
chr1	71066865	71066874	CDS;ZRANB2;protein_coding;ENSG00000132485.14	4.17769	-
chr1	71066877	71066886	CDS;ZRANB2;protein_coding;ENSG00000132485.14	23.864	-
chr1	71066902	71066911	CDS;ZRANB2;protein_coding;ENSG00000132485.14	11.3126	-
chr1	71067016	71067025	exon;ZRANB2;protein_coding;ENSG00000132485.14	36.3237	-
chr1	71069168	71069177	intron;ZRANB2;protein_coding;ENSG00000132485.14	17.8824	-
chr1	71069186	71069195	intron;ZRANB2;protein_coding;ENSG00000132485.14	19.4719	-
chr1	74705812	74705821	three_prime_UTR;CRYZ;protein_coding;ENSG00000116791.14	35.8279	-
chr1	74705833	74705842	three_prime_UTR;CRYZ;protein_coding;ENSG00000116791.14	72.5647	-
chr1	74764144	74764153	three_prime_UTR;TYW3;protein_coding;ENSG00000162623.16	82.9348	+
chr1	74764154	74764163	three_prime_UTR;TYW3;protein_coding;ENSG00000162623.16	207.65	+
chr1	74764293	74764302	three_prime_UTR;TYW3;protein_coding;ENSG00000162623.16	2.55643	+
chr1	75787882	75787891	exon;RABGGTB;protein_coding;ENSG00000137955.16	282.292	+
chr1	75787916	75787925	exon;RABGGTB;protein_coding;ENSG00000137955.16	96.9191	+
chr1	75787930	75787939	exon;RABGGTB;protein_coding;ENSG00000137955.16	7.84448	+
chr1	75794656	75794665	three_prime_UTR;RABGGTB;protein_coding;ENSG00000137955.16	26.8347	+
chr1	75794669	75794678	three_prime_UTR;RABGGTB;protein_coding;ENSG00000137955.16	23.9572	+
chr1	75794700	75794709	three_prime_UTR;RABGGTB;protein_coding;ENSG00000137955.16	13.555	+
chr1	75794743	75794752	three_prime_UTR;RABGGTB;protein_coding;ENSG00000137955.16	5.25792	+
chr1	77565146	77565155	three_prime_UTR;ZZZ3;protein_coding;ENSG00000036549.13	174.997	-
chr1	77620406	77620415	intron;ZZZ3;protein_coding;ENSG00000036549.13	3.08161	-
chr1	77620420	77620429	intron;ZZZ3;protein_coding;ENSG00000036549.13	7.63496	-
chr1	77620436	77620445	intron;ZZZ3;protein_coding;ENSG00000036549.13	1.46999	-
chr1	77620457	77620466	intron;ZZZ3;protein_coding;ENSG00000036549.13	24.7462	-
chr1	77620551	77620560	intron;ZZZ3;protein_coding;ENSG00000036549.13	14.4679	-
chr1	77620562	77620571	intron;ZZZ3;protein_coding;ENSG00000036549.13	8.10654	-
chr1	77620574	77620583	intron;ZZZ3;protein_coding;ENSG00000036549.13	15.8572	-
chr1	77948451	77948460	three_prime_UTR;FUBP1;protein_coding;ENSG00000162613.17	2.68864	-
chr1	77948464	77948473	three_prime_UTR;FUBP1;protein_coding;ENSG00000162613.17	7.68804	-
chr1	77948549	77948558	three_prime_UTR;FUBP1;protein_coding;ENSG00000162613.17	7.72455	-
chr1	77948624	77948633	three_prime_UTR;FUBP1;protein_coding;ENSG00000162613.17	9.18626	-
chr1	77948635	77948644	three_prime_UTR;FUBP1;protein_coding;ENSG00000162613.17	8.97288	-
chr1	77948866	77948875	three_prime_UTR;FUBP1;protein_coding;ENSG00000162613.17	6.30784	-
chr1	77948923	77948932	intron;FUBP1;protein_coding;ENSG00000162613.17	42.6427	-
chr1	84235598	84235607	three_prime_UTR;PRKACB;protein_coding;ENSG00000142875.20	9.14021	+
chr1	84236772	84236781	three_prime_UTR;PRKACB;protein_coding;ENSG00000142875.20	41.5857	+
chr1	84236784	84236793	three_prime_UTR;PRKACB;protein_coding;ENSG00000142875.20	19.8165	+
chr1	84236798	84236807	three_prime_UTR;PRKACB;protein_coding;ENSG00000142875.20	43.4349	+
chr1	84236858	84236867	three_prime_UTR;PRKACB;protein_coding;ENSG00000142875.20	1.4272	+
chr1	84236890	84236899	three_prime_UTR;PRKACB;protein_coding;ENSG00000142875.20	6.73351	+
chr1	84236943	84236952	three_prime_UTR;PRKACB;protein_coding;ENSG00000142875.20	10.0625	+
chr1	84236977	84236986	three_prime_UTR;PRKACB;protein_coding;ENSG00000142875.20	12.8696	+
chr1	84237309	84237318	three_prime_UTR;PRKACB;protein_coding;ENSG00000142875.20	20.1345	+
chr1	84237347	84237356	three_prime_UTR;PRKACB;protein_coding;ENSG00000142875.20	101.193	+
chr1	84237378	84237387	three_prime_UTR;PRKACB;protein_coding;ENSG00000142875.20	214.767	+
chr1	84237428	84237437	three_prime_UTR;PRKACB;protein_coding;ENSG00000142875.20	182.885	+
chr1	84237438	84237447	three_prime_UTR;PRKACB;protein_coding;ENSG00000142875.20	133.222	+
chr1	84237452	84237461	three_prime_UTR;PRKACB;protein_coding;ENSG00000142875.20	15.3995	+
chr1	84237502	84237511	three_prime_UTR;PRKACB;protein_coding;ENSG00000142875.20	6.16588	+
chr1	84238268	84238277	three_prime_UTR;PRKACB;protein_coding;ENSG00000142875.20	11.4511	+
chr1	84238306	84238315	three_prime_UTR;PRKACB;protein_coding;ENSG00000142875.20	15.3529	+
chr1	84238346	84238355	three_prime_UTR;PRKACB;protein_coding;ENSG00000142875.20	18.2743	+
chr1	84238373	84238382	three_prime_UTR;PRKACB;protein_coding;ENSG00000142875.20	34.5523	+
chr1	84498398	84498407	three_prime_UTR;GNG5;protein_coding;ENSG00000174021.12	5.89407	-
chr1	84498439	84498448	three_prime_UTR;GNG5;protein_coding;ENSG00000174021.12	49.1664	-
chr1	84498470	84498479	three_prime_UTR;GNG5;protein_coding;ENSG00000174021.12	12.4116	-
chr1	84498494	84498503	three_prime_UTR;GNG5;protein_coding;ENSG00000174021.12	39.1321	-
chr1	84498518	84498527	three_prime_UTR;GNG5;protein_coding;ENSG00000174021.12	38.4502	-
chr1	84498528	84498537	three_prime_UTR;GNG5;protein_coding;ENSG00000174021.12	63.3985	-
chr1	85252165	85252174	three_prime_UTR;C1orf52;protein_coding;ENSG00000162642.14	1.8484	-
chr1	85252247	85252256	three_prime_UTR;C1orf52;protein_coding;ENSG00000162642.14	6.28254	-
chr1	85252295	85252304	three_prime_UTR;C1orf52;protein_coding;ENSG00000162642.14	85.4002	-
chr1	85252310	85252319	three_prime_UTR;C1orf52;protein_coding;ENSG00000162642.14	155.726	-
chr1	85252323	85252332	three_prime_UTR;C1orf52;protein_coding;ENSG00000162642.14	120.886	-
chr1	85252340	85252349	three_prime_UTR;C1orf52;protein_coding;ENSG00000162642.14	136.869	-
chr1	85252373	85252382	three_prime_UTR;C1orf52;protein_coding;ENSG00000162642.14	49.566	-
chr1	85252404	85252413	three_prime_UTR;C1orf52;protein_coding;ENSG00000162642.14	21.1597	-
chr1	85252433	85252442	three_prime_UTR;C1orf52;protein_coding;ENSG00000162642.14	8.83243	-
chr1	85267345	85267354	three_prime_UTR;BCL10;protein_coding;ENSG00000142867.14	54.3054	-
chr1	86386793	86386802	three_prime_UTR;ODF2L;protein_coding;ENSG00000122417.16	5.32532	-
chr1	86386805	86386814	three_prime_UTR;ODF2L;protein_coding;ENSG00000122417.16	8.43754	-
chr1	86386815	86386824	three_prime_UTR;ODF2L;protein_coding;ENSG00000122417.16	68.0558	-
chr1	86386851	86386860	CDS;ODF2L;protein_coding;ENSG00000122417.16	15.0628	-
chr1	86745751	86745760	three_prime_UTR;SH3GLB1;protein_coding;ENSG00000097033.14	23.5139	+
chr1	86862499	86862508	three_prime_UTR;SELENOF;protein_coding;ENSG00000183291.18	18.127	-
chr1	86862512	86862521	three_prime_UTR;SELENOF;protein_coding;ENSG00000183291.18	3.14591	-
chr1	86862533	86862542	three_prime_UTR;SELENOF;protein_coding;ENSG00000183291.18	17.6126	-
chr1	86862553	86862562	three_prime_UTR;SELENOF;protein_coding;ENSG00000183291.18	8.30386	-
chr1	86862573	86862582	three_prime_UTR;SELENOF;protein_coding;ENSG00000183291.18	120.516	-
chr1	86862585	86862594	three_prime_UTR;SELENOF;protein_coding;ENSG00000183291.18	39.1911	-
chr1	88834477	88834486	three_prime_UTR;PKN2;protein_coding;ENSG00000065243.20	44.8557	+
chr1	88834495	88834504	three_prime_UTR;PKN2;protein_coding;ENSG00000065243.20	14.5512	+
chr1	88834508	88834517	three_prime_UTR;PKN2;protein_coding;ENSG00000065243.20	27.0286	+
chr1	88834530	88834539	three_prime_UTR;PKN2;protein_coding;ENSG00000065243.20	18.6705	+
chr1	88834540	88834549	three_prime_UTR;PKN2;protein_coding;ENSG00000065243.20	7.04426	+
chr1	88834558	88834567	three_prime_UTR;PKN2;protein_coding;ENSG00000065243.20	18.6383	+
chr1	89117330	89117339	intron;GBP2;protein_coding;ENSG00000162645.13	76.7339	-
chr1	89117348	89117357	intron;GBP2;protein_coding;ENSG00000162645.13	16.8986	-
chr1	89117358	89117367	intron;GBP2;protein_coding;ENSG00000162645.13	22.2662	-
chr1	89121860	89121869	CDS;GBP2;protein_coding;ENSG00000162645.13	39.3886	-
chr1	89121871	89121880	CDS;GBP2;protein_coding;ENSG00000162645.13	48.2652	-
chr1	89121941	89121950	CDS;GBP2;protein_coding;ENSG00000162645.13	236.376	-
chr1	89121957	89121966	CDS;GBP2;protein_coding;ENSG00000162645.13	76.7999	-
chr1	89181857	89181866	three_prime_UTR;GBP4;protein_coding;ENSG00000162654.9	10.185	-
chr1	89181927	89181936	three_prime_UTR;GBP4;protein_coding;ENSG00000162654.9	28.0301	-
chr1	89258997	89259006	three_prime_UTR;GBP5;protein_coding;ENSG00000154451.15	40.4282	-
chr1	89259008	89259017	three_prime_UTR;GBP5;protein_coding;ENSG00000154451.15	78.0945	-
chr1	89259046	89259055	three_prime_UTR;GBP5;protein_coding;ENSG00000154451.15	1.68217	-
chr1	89259061	89259070	three_prime_UTR;GBP5;protein_coding;ENSG00000154451.15	22.1522	-
chr1	89259084	89259093	three_prime_UTR;GBP5;protein_coding;ENSG00000154451.15	10.6115	-
chr1	89259163	89259172	three_prime_UTR;GBP5;protein_coding;ENSG00000154451.15	6.24415	-
chr1	89259189	89259198	three_prime_UTR;GBP5;protein_coding;ENSG00000154451.15	23.0919	-
chr1	89260424	89260433	three_prime_UTR;GBP5;protein_coding;ENSG00000154451.15	1.56507	-
chr1	89260446	89260455	three_prime_UTR;GBP5;protein_coding;ENSG00000154451.15	69.3304	-
chr1	89260478	89260487	three_prime_UTR;GBP5;protein_coding;ENSG00000154451.15	4.55673	-
chr1	89260588	89260597	three_prime_UTR;GBP5;protein_coding;ENSG00000154451.15	29.1282	-
chr1	89271921	89271930	five_prime_UTR;GBP5;protein_coding;ENSG00000154451.15	11.0792	-
chr1	89272489	89272498	five_prime_UTR;GBP5;protein_coding;ENSG00000154451.15	18.1877	-
chr1	89272509	89272518	five_prime_UTR;GBP5;protein_coding;ENSG00000154451.15	0.0313008	-
chr1	90915925	90915934	three_prime_UTR;ZNF644;protein_coding;ENSG00000122482.22	6.96239	-
chr1	90915994	90916003	three_prime_UTR;ZNF644;protein_coding;ENSG00000122482.22	6.63817	-
chr1	90916023	90916032	three_prime_UTR;ZNF644;protein_coding;ENSG00000122482.22	4.75748	-
chr1	90916034	90916043	three_prime_UTR;ZNF644;protein_coding;ENSG00000122482.22	11.495	-
chr1	90916067	90916076	three_prime_UTR;ZNF644;protein_coding;ENSG00000122482.22	24.4573	-
chr1	90916188	90916197	three_prime_UTR;ZNF644;protein_coding;ENSG00000122482.22	22.424	-
chr1	90916213	90916222	three_prime_UTR;ZNF644;protein_coding;ENSG00000122482.22	38.594	-
chr1	90916224	90916233	three_prime_UTR;ZNF644;protein_coding;ENSG00000122482.22	58.9328	-
chr1	90916243	90916252	three_prime_UTR;ZNF644;protein_coding;ENSG00000122482.22	23.18	-
chr1	91681751	91681760	three_prime_UTR;TGFBR3;protein_coding;ENSG00000069702.11	1.78844	-
chr1	92832032	92832041	five_prime_UTR;RPL5;protein_coding;ENSG00000122406.14	444.751	+
chr1	92832073	92832082	five_prime_UTR;RPL5;protein_coding;ENSG00000122406.14	4.73653	+
chr1	92832102	92832111	five_prime_UTR;RPL5;protein_coding;ENSG00000122406.14	5.55833	+
chr1	92833177	92833186	exon;RPL5;protein_coding;ENSG00000122406.14	11.1413	+
chr1	92833387	92833396	exon;RPL5;protein_coding;ENSG00000122406.14	24.334	+
chr1	92833404	92833413	five_prime_UTR;RPL5;protein_coding;ENSG00000122406.14	7.23995	+
chr1	92833418	92833427	five_prime_UTR;RPL5;protein_coding;ENSG00000122406.14	31.3231	+
chr1	92833437	92833446	five_prime_UTR;RPL5;protein_coding;ENSG00000122406.14	106.226	+
chr1	92833554	92833563	five_prime_UTR;RPL5;protein_coding;ENSG00000122406.14	53.0616	+
chr1	92833597	92833606	five_prime_UTR;RPL5;protein_coding;ENSG00000122406.14	8.91236	+
chr1	92833613	92833622	five_prime_UTR;RPL5;protein_coding;ENSG00000122406.14	43.7144	+
chr1	92833646	92833655	CDS;RPL5;protein_coding;ENSG00000122406.14	120.006	+
chr1	92834788	92834797	three_prime_UTR;RPL5;protein_coding;ENSG00000122406.14	55.3291	+
chr1	92837541	92837550	CDS;RPL5;protein_coding;ENSG00000122406.14	50.2573	+
chr1	92840712	92840721	intron;RPL5;protein_coding;ENSG00000122406.14	58.3237	+
chr1	92841809	92841818	CDS;RPL5;protein_coding;ENSG00000122406.14	93.5708	+
chr1	93152136	93152145	three_prime_UTR;TMED5;protein_coding;ENSG00000117500.13	40.6308	-
chr1	93152146	93152155	three_prime_UTR;TMED5;protein_coding;ENSG00000117500.13	44.5791	-
chr1	93152861	93152870	three_prime_UTR;TMED5;protein_coding;ENSG00000117500.13	20.7641	-
chr1	93346737	93346746	CDS;DR1;protein_coding;ENSG00000117505.13	153.547	+
chr1	93346762	93346771	CDS;DR1;protein_coding;ENSG00000117505.13	3.23997	+
chr1	93346778	93346787	CDS;DR1;protein_coding;ENSG00000117505.13	123.483	+
chr1	93346788	93346797	CDS;DR1;protein_coding;ENSG00000117505.13	268.272	+
chr1	93360805	93360814	three_prime_UTR;DR1;protein_coding;ENSG00000117505.13	2.24061	+
chr1	93360861	93360870	three_prime_UTR;DR1;protein_coding;ENSG00000117505.13	22.937	+
chr1	93360902	93360911	three_prime_UTR;DR1;protein_coding;ENSG00000117505.13	2.37054	+
chr1	93361352	93361361	three_prime_UTR;DR1;protein_coding;ENSG00000117505.13	4.34495	+
chr1	93361371	93361380	three_prime_UTR;DR1;protein_coding;ENSG00000117505.13	8.35511	+
chr1	93361430	93361439	three_prime_UTR;DR1;protein_coding;ENSG00000117505.13	120.75	+
chr1	93361440	93361449	three_prime_UTR;DR1;protein_coding;ENSG00000117505.13	8.06578	+
chr1	93361623	93361632	three_prime_UTR;DR1;protein_coding;ENSG00000117505.13	21.3232	+
chr1	93362468	93362477	three_prime_UTR;DR1;protein_coding;ENSG00000117505.13	43.7721	+
chr1	93362499	93362508	three_prime_UTR;DR1;protein_coding;ENSG00000117505.13	10.9188	+
chr1	93368129	93368138	three_prime_UTR;DR1;protein_coding;ENSG00000117505.13	18.2685	+
chr1	93368143	93368152	three_prime_UTR;DR1;protein_coding;ENSG00000117505.13	14.771	+
chr1	94475193	94475202	CDS;ABCD3;protein_coding;ENSG00000117528.14	18.7704	+
chr1	94475208	94475217	CDS;ABCD3;protein_coding;ENSG00000117528.14	171.173	+
chr1	94475219	94475228	CDS;ABCD3;protein_coding;ENSG00000117528.14	53.769	+
chr1	94517873	94517882	three_prime_UTR;ABCD3;protein_coding;ENSG00000117528.14	60.52	+
chr1	94517883	94517892	three_prime_UTR;ABCD3;protein_coding;ENSG00000117528.14	8.76662	+
chr1	94517894	94517903	three_prime_UTR;ABCD3;protein_coding;ENSG00000117528.14	25.2445	+
chr1	94517906	94517915	three_prime_UTR;ABCD3;protein_coding;ENSG00000117528.14	17.0719	+
chr1	96780337	96780346	intron;PTBP2;protein_coding;ENSG00000117569.19	24.6472	+
chr1	96780364	96780373	intron;PTBP2;protein_coding;ENSG00000117569.19	14.2154	+
chr1	97813904	97813913	intron;DPYD;protein_coding;ENSG00000188641.14	79.5531	-
chr1	97813916	97813925	intron;DPYD;protein_coding;ENSG00000188641.14	5.937	-
chr1	97814133	97814142	intron;DPYD;protein_coding;ENSG00000188641.14	8.54253	-
chr1	97814211	97814220	intron;DPYD;protein_coding;ENSG00000188641.14	16.9849	-
chr1	97814285	97814294	intron;DPYD;protein_coding;ENSG00000188641.14	1.73505	-
chr1	97814323	97814332	intron;DPYD;protein_coding;ENSG00000188641.14	4.92754	-
chr1	97814406	97814415	intron;DPYD;protein_coding;ENSG00000188641.14	11.0518	-
chr1	97814422	97814431	intron;DPYD;protein_coding;ENSG00000188641.14	16.2526	-
chr1	97814436	97814445	intron;DPYD;protein_coding;ENSG00000188641.14	58.3275	-
chr1	97814466	97814475	intron;DPYD;protein_coding;ENSG00000188641.14	19.4855	-
chr1	97814490	97814499	intron;DPYD;protein_coding;ENSG00000188641.14	8.53481	-
chr1	97814507	97814516	intron;DPYD;protein_coding;ENSG00000188641.14	17.0562	-
chr1	97814573	97814582	intron;DPYD;protein_coding;ENSG00000188641.14	11.6653	-
chr1	97814902	97814911	intron;DPYD;protein_coding;ENSG00000188641.14	58.0913	-
chr1	97815054	97815063	intron;DPYD;protein_coding;ENSG00000188641.14	4.81919	-
chr1	97815163	97815172	intron;DPYD;protein_coding;ENSG00000188641.14	15.7849	-
chr1	97815249	97815258	intron;DPYD;protein_coding;ENSG00000188641.14	8.31686	-
chr1	97815334	97815343	intron;DPYD;protein_coding;ENSG00000188641.14	11.3694	-
chr1	97815416	97815425	intron;DPYD;protein_coding;ENSG00000188641.14	3.63176	-
chr1	97815428	97815437	intron;DPYD;protein_coding;ENSG00000188641.14	23.8706	-
chr1	97815492	97815501	intron;DPYD;protein_coding;ENSG00000188641.14	16.2517	-
chr1	97815638	97815647	intron;DPYD;protein_coding;ENSG00000188641.14	2.32228	-
chr1	97815721	97815730	intron;DPYD;protein_coding;ENSG00000188641.14	20.1691	-
chr1	97815777	97815786	intron;DPYD;protein_coding;ENSG00000188641.14	3.30043	-
chr1	100214819	100214828	CDS;DBT;protein_coding;ENSG00000137992.15	1.09134	-
chr1	100214834	100214843	CDS;DBT;protein_coding;ENSG00000137992.15	125.782	-
chr1	100510698	100510707	intron;CDC14A;protein_coding;ENSG00000079335.20	1.15993	+
chr1	100511030	100511039	intron;CDC14A;protein_coding;ENSG00000079335.20	23.5374	+
chr1	100511130	100511139	intron;CDC14A;protein_coding;ENSG00000079335.20	10.7667	+
chr1	100511143	100511152	intron;CDC14A;protein_coding;ENSG00000079335.20	8.05532	+
chr1	100511196	100511205	intron;CDC14A;protein_coding;ENSG00000079335.20	5.52526	+
chr1	100518581	100518590	three_prime_UTR;CDC14A;protein_coding;ENSG00000079335.20	1.5641	+
chr1	100518753	100518762	three_prime_UTR;CDC14A;protein_coding;ENSG00000079335.20	26.6042	+
chr1	100518820	100518829	three_prime_UTR;CDC14A;protein_coding;ENSG00000079335.20	11.4815	+
chr1	100519340	100519349	three_prime_UTR;CDC14A;protein_coding;ENSG00000079335.20	21.6446	+
chr1	100519372	100519381	three_prime_UTR;CDC14A;protein_coding;ENSG00000079335.20	13.4803	+
chr1	100519399	100519408	three_prime_UTR;CDC14A;protein_coding;ENSG00000079335.20	90.8762	+
chr1	100519410	100519419	three_prime_UTR;CDC14A;protein_coding;ENSG00000079335.20	62.3022	+
chr1	100519433	100519442	three_prime_UTR;CDC14A;protein_coding;ENSG00000079335.20	78.3115	+
chr1	100520005	100520014	three_prime_UTR;CDC14A;protein_coding;ENSG00000079335.20	8.06783	+
chr1	100520016	100520025	three_prime_UTR;CDC14A;protein_coding;ENSG00000079335.20	4.31541	+
chr1	100520056	100520065	three_prime_UTR;CDC14A;protein_coding;ENSG00000079335.20	8.21106	+
chr1	100520071	100520080	three_prime_UTR;CDC14A;protein_coding;ENSG00000079335.20	50.1688	+
chr1	100520143	100520152	three_prime_UTR;CDC14A;protein_coding;ENSG00000079335.20	10.2145	+
chr1	100520164	100520173	three_prime_UTR;CDC14A;protein_coding;ENSG00000079335.20	6.48514	+
chr1	100520217	100520226	three_prime_UTR;CDC14A;protein_coding;ENSG00000079335.20	17.2849	+
chr1	100907970	100907979	intron;SLC30A7;protein_coding;ENSG00000162695.12	20.1506	+
chr1	100908051	100908060	intron;SLC30A7;protein_coding;ENSG00000162695.12	12.287	+
chr1	101240633	101240642	three_prime_UTR;S1PR1;protein_coding;ENSG00000170989.10	41.7283	+
chr1	101240747	101240756	three_prime_UTR;S1PR1;protein_coding;ENSG00000170989.10	8.00205	+
chr1	101240760	101240769	three_prime_UTR;S1PR1;protein_coding;ENSG00000170989.10	15.9834	+
chr1	101240772	101240781	three_prime_UTR;S1PR1;protein_coding;ENSG00000170989.10	85.2656	+
chr1	101240859	101240868	three_prime_UTR;S1PR1;protein_coding;ENSG00000170989.10	61.9861	+
chr1	101241009	101241018	three_prime_UTR;S1PR1;protein_coding;ENSG00000170989.10	21.2326	+
chr1	101241135	101241144	three_prime_UTR;S1PR1;protein_coding;ENSG00000170989.10	9.27647	+
chr1	101241150	101241159	three_prime_UTR;S1PR1;protein_coding;ENSG00000170989.10	11.8956	+
chr1	101241176	101241185	three_prime_UTR;S1PR1;protein_coding;ENSG00000170989.10	8.42526	+
chr1	101241189	101241198	three_prime_UTR;S1PR1;protein_coding;ENSG00000170989.10	15.8252	+
chr1	101241199	101241208	three_prime_UTR;S1PR1;protein_coding;ENSG00000170989.10	7.51083	+
chr1	101241240	101241249	three_prime_UTR;S1PR1;protein_coding;ENSG00000170989.10	21.881	+
chr1	101241264	101241273	three_prime_UTR;S1PR1;protein_coding;ENSG00000170989.10	71.1401	+
chr1	101241339	101241348	three_prime_UTR;S1PR1;protein_coding;ENSG00000170989.10	5.18591	+
chr1	101241352	101241361	three_prime_UTR;S1PR1;protein_coding;ENSG00000170989.10	7.96921	+
chr1	101241370	101241379	three_prime_UTR;S1PR1;protein_coding;ENSG00000170989.10	20.9035	+
chr1	101241380	101241389	three_prime_UTR;S1PR1;protein_coding;ENSG00000170989.10	2.87552	+
chr1	101241431	101241440	three_prime_UTR;S1PR1;protein_coding;ENSG00000170989.10	47.1274	+
chr1	101241460	101241469	three_prime_UTR;S1PR1;protein_coding;ENSG00000170989.10	7.7523	+
chr1	108135768	108135777	three_prime_UTR;SLC25A24;protein_coding;ENSG00000085491.17	13.3858	-
chr1	108135879	108135888	three_prime_UTR;SLC25A24;protein_coding;ENSG00000085491.17	41.1152	-
chr1	108135921	108135930	three_prime_UTR;SLC25A24;protein_coding;ENSG00000085491.17	73.5188	-
chr1	108136006	108136015	three_prime_UTR;SLC25A24;protein_coding;ENSG00000085491.17	61.3311	-
chr1	108136026	108136035	three_prime_UTR;SLC25A24;protein_coding;ENSG00000085491.17	123.63	-
chr1	108136054	108136063	three_prime_UTR;SLC25A24;protein_coding;ENSG00000085491.17	21.9237	-
chr1	108136065	108136074	three_prime_UTR;SLC25A24;protein_coding;ENSG00000085491.17	3.11088	-
chr1	108136089	108136098	three_prime_UTR;SLC25A24;protein_coding;ENSG00000085491.17	22.207	-
chr1	108696577	108696586	exon;PRPF38B;protein_coding;ENSG00000134186.12	45.0628	+
chr1	108700069	108700078	three_prime_UTR;PRPF38B;protein_coding;ENSG00000134186.12	2.7993	+
chr1	108700134	108700143	three_prime_UTR;PRPF38B;protein_coding;ENSG00000134186.12	31.7223	+
chr1	108700257	108700266	three_prime_UTR;PRPF38B;protein_coding;ENSG00000134186.12	29.07	+
chr1	108700270	108700279	three_prime_UTR;PRPF38B;protein_coding;ENSG00000134186.12	4.13735	+
chr1	108700295	108700304	three_prime_UTR;PRPF38B;protein_coding;ENSG00000134186.12	26.9502	+
chr1	110021753	110021762	three_prime_UTR;AHCYL1;protein_coding;ENSG00000168710.18	78.6592	+
chr1	110021775	110021784	three_prime_UTR;AHCYL1;protein_coding;ENSG00000168710.18	41.545	+
chr1	110021789	110021798	three_prime_UTR;AHCYL1;protein_coding;ENSG00000168710.18	13.795	+
chr1	110346013	110346022	intron;RBM15;protein_coding;ENSG00000162775.17	186.021	+
chr1	110401316	110401325	three_prime_UTR;LAMTOR5;protein_coding;ENSG00000134248.14	5.37168	-
chr1	110401371	110401380	three_prime_UTR;LAMTOR5;protein_coding;ENSG00000134248.14	39.1057	-
chr1	110401387	110401396	three_prime_UTR;LAMTOR5;protein_coding;ENSG00000134248.14	28.3555	-
chr1	110672524	110672533	three_prime_UTR;KCNA3;protein_coding;ENSG00000177272.9	4.54861	-
chr1	110672547	110672556	three_prime_UTR;KCNA3;protein_coding;ENSG00000177272.9	3.18814	-
chr1	110672625	110672634	three_prime_UTR;KCNA3;protein_coding;ENSG00000177272.9	10.7849	-
chr1	110672703	110672712	three_prime_UTR;KCNA3;protein_coding;ENSG00000177272.9	6.02097	-
chr1	110672718	110672727	three_prime_UTR;KCNA3;protein_coding;ENSG00000177272.9	46.228	-
chr1	110672859	110672868	three_prime_UTR;KCNA3;protein_coding;ENSG00000177272.9	23.8819	-
chr1	110672869	110672878	three_prime_UTR;KCNA3;protein_coding;ENSG00000177272.9	20.935	-
chr1	110672882	110672891	three_prime_UTR;KCNA3;protein_coding;ENSG00000177272.9	15.5902	-
chr1	110672900	110672909	three_prime_UTR;KCNA3;protein_coding;ENSG00000177272.9	136.94	-
chr1	110672955	110672964	three_prime_UTR;KCNA3;protein_coding;ENSG00000177272.9	18.7236	-
chr1	110672969	110672978	three_prime_UTR;KCNA3;protein_coding;ENSG00000177272.9	1.24796	-
chr1	110673002	110673011	three_prime_UTR;KCNA3;protein_coding;ENSG00000177272.9	28.6853	-
chr1	110894348	110894357	CDS;CD53;protein_coding;ENSG00000143119.14	87.4895	+
chr1	110894380	110894389	CDS;CD53;protein_coding;ENSG00000143119.14	18.2218	+
chr1	110894653	110894662	intron;CD53;protein_coding;ENSG00000143119.14	12.2514	+
chr1	110894666	110894675	intron;CD53;protein_coding;ENSG00000143119.14	33.2848	+
chr1	110894954	110894963	intron;CD53;protein_coding;ENSG00000143119.14	10.2525	+
chr1	110894999	110895008	CDS;CD53;protein_coding;ENSG00000143119.14	20.1382	+
chr1	110895013	110895022	CDS;CD53;protein_coding;ENSG00000143119.14	73.9814	+
chr1	110895025	110895034	CDS;CD53;protein_coding;ENSG00000143119.14	11.1738	+
chr1	110896651	110896660	intron;CD53;protein_coding;ENSG00000143119.14	45.5094	+
chr1	110896700	110896709	CDS;CD53;protein_coding;ENSG00000143119.14	13.5108	+
chr1	110899323	110899332	three_prime_UTR;CD53;protein_coding;ENSG00000143119.14	9.6117	+
chr1	110899474	110899483	three_prime_UTR;CD53;protein_coding;ENSG00000143119.14	161.763	+
chr1	110899490	110899499	three_prime_UTR;CD53;protein_coding;ENSG00000143119.14	556.992	+
chr1	110899500	110899509	three_prime_UTR;CD53;protein_coding;ENSG00000143119.14	81.9626	+
chr1	110899512	110899521	three_prime_UTR;CD53;protein_coding;ENSG00000143119.14	296.881	+
chr1	110899681	110899690	three_prime_UTR;CD53;protein_coding;ENSG00000143119.14	21.9505	+
chr1	110899727	110899736	three_prime_UTR;CD53;protein_coding;ENSG00000143119.14	28.0937	+
chr1	110899741	110899750	three_prime_UTR;CD53;protein_coding;ENSG00000143119.14	11.4486	+
chr1	110899786	110899795	three_prime_UTR;CD53;protein_coding;ENSG00000143119.14	58.364	+
chr1	110899798	110899807	three_prime_UTR;CD53;protein_coding;ENSG00000143119.14	77.1184	+
chr1	110899811	110899820	three_prime_UTR;CD53;protein_coding;ENSG00000143119.14	8.96906	+
chr1	110899822	110899831	three_prime_UTR;CD53;protein_coding;ENSG00000143119.14	35.5102	+
chr1	110899868	110899877	three_prime_UTR;CD53;protein_coding;ENSG00000143119.14	4.31479	+
chr1	111182255	111182264	CDS;CEPT1;protein_coding;ENSG00000134255.15	7.10089	+
chr1	111182842	111182851	CDS;CEPT1;protein_coding;ENSG00000134255.15	118.846	+
chr1	111182866	111182875	CDS;CEPT1;protein_coding;ENSG00000134255.15	2.81703	+
chr1	111182882	111182891	CDS;CEPT1;protein_coding;ENSG00000134255.15	11.323	+
chr1	111182900	111182909	CDS;CEPT1;protein_coding;ENSG00000134255.15	15.5802	+
chr1	111182932	111182941	CDS;CEPT1;protein_coding;ENSG00000134255.15	6.98937	+
chr1	111184195	111184204	CDS;CEPT1;protein_coding;ENSG00000134255.15	65.0848	+
chr1	111184207	111184216	CDS;CEPT1;protein_coding;ENSG00000134255.15	10.472	+
chr1	111441067	111441076	three_prime_UTR;WDR77;protein_coding;ENSG00000116455.14	4.30587	-
chr1	111441105	111441114	three_prime_UTR;WDR77;protein_coding;ENSG00000116455.14	25.7055	-
chr1	111441115	111441124	three_prime_UTR;WDR77;protein_coding;ENSG00000116455.14	36.9712	-
chr1	111625708	111625717	intron;RAP1A;protein_coding;ENSG00000116473.15	8.68776	+
chr1	111625718	111625727	intron;RAP1A;protein_coding;ENSG00000116473.15	17.2293	+
chr1	111625747	111625756	intron;RAP1A;protein_coding;ENSG00000116473.15	6.11946	+
chr1	111625794	111625803	intron;RAP1A;protein_coding;ENSG00000116473.15	6.22881	+
chr1	111625813	111625822	intron;RAP1A;protein_coding;ENSG00000116473.15	5.10221	+
chr1	111689337	111689346	intron;RAP1A;protein_coding;ENSG00000116473.15	3.41956	+
chr1	111689396	111689405	intron;RAP1A;protein_coding;ENSG00000116473.15	2.84786	+
chr1	111700014	111700023	intron;RAP1A;protein_coding;ENSG00000116473.15	16.4913	+
chr1	111700061	111700070	intron;RAP1A;protein_coding;ENSG00000116473.15	35.9196	+
chr1	111712560	111712569	three_prime_UTR;RAP1A;protein_coding;ENSG00000116473.15	15.4698	+
chr1	111712601	111712610	three_prime_UTR;RAP1A;protein_coding;ENSG00000116473.15	4.68169	+
chr1	111712617	111712626	three_prime_UTR;RAP1A;protein_coding;ENSG00000116473.15	11.3583	+
chr1	111713111	111713120	three_prime_UTR;RAP1A;protein_coding;ENSG00000116473.15	8.53492	+
chr1	111713124	111713133	three_prime_UTR;RAP1A;protein_coding;ENSG00000116473.15	184.78	+
chr1	111713134	111713143	three_prime_UTR;RAP1A;protein_coding;ENSG00000116473.15	2.60736	+
chr1	111713155	111713164	three_prime_UTR;RAP1A;protein_coding;ENSG00000116473.15	343.741	+
chr1	111713195	111713204	three_prime_UTR;RAP1A;protein_coding;ENSG00000116473.15	11.9403	+
chr1	111713303	111713312	three_prime_UTR;RAP1A;protein_coding;ENSG00000116473.15	7.03978	+
chr1	111713359	111713368	three_prime_UTR;RAP1A;protein_coding;ENSG00000116473.15	52.2596	+
chr1	111713399	111713408	three_prime_UTR;RAP1A;protein_coding;ENSG00000116473.15	36.6393	+
chr1	111713447	111713456	three_prime_UTR;RAP1A;protein_coding;ENSG00000116473.15	14.8615	+
chr1	112657302	112657311	intron;CAPZA1;protein_coding;ENSG00000116489.13	1.45862	+
chr1	112657407	112657416	intron;CAPZA1;protein_coding;ENSG00000116489.13	18.6727	+
chr1	112670314	112670323	three_prime_UTR;CAPZA1;protein_coding;ENSG00000116489.13	25.3559	+
chr1	112670324	112670333	three_prime_UTR;CAPZA1;protein_coding;ENSG00000116489.13	18.4463	+
chr1	112670394	112670403	three_prime_UTR;CAPZA1;protein_coding;ENSG00000116489.13	52.8281	+
chr1	112670411	112670420	three_prime_UTR;CAPZA1;protein_coding;ENSG00000116489.13	18.5294	+
chr1	112670503	112670512	three_prime_UTR;CAPZA1;protein_coding;ENSG00000116489.13	13.4473	+
chr1	112670517	112670526	three_prime_UTR;CAPZA1;protein_coding;ENSG00000116489.13	9.51543	+
chr1	112670544	112670553	three_prime_UTR;CAPZA1;protein_coding;ENSG00000116489.13	107.246	+
chr1	112670808	112670817	three_prime_UTR;CAPZA1;protein_coding;ENSG00000116489.13	45.0881	+
chr1	112670832	112670841	three_prime_UTR;CAPZA1;protein_coding;ENSG00000116489.13	9.6874	+
chr1	112670933	112670942	three_prime_UTR;CAPZA1;protein_coding;ENSG00000116489.13	6.2889	+
chr1	112671432	112671441	three_prime_UTR;CAPZA1;protein_coding;ENSG00000116489.13	73.9128	+
chr1	112671460	112671469	three_prime_UTR;CAPZA1;protein_coding;ENSG00000116489.13	44.8075	+
chr1	112671471	112671480	three_prime_UTR;CAPZA1;protein_coding;ENSG00000116489.13	52.12	+
chr1	112671488	112671497	three_prime_UTR;CAPZA1;protein_coding;ENSG00000116489.13	8.18608	+
chr1	112671506	112671515	three_prime_UTR;CAPZA1;protein_coding;ENSG00000116489.13	26.9474	+
chr1	112912707	112912716	three_prime_UTR;SLC16A1;protein_coding;ENSG00000155380.13	245.749	-
chr1	112912745	112912754	three_prime_UTR;SLC16A1;protein_coding;ENSG00000155380.13	8.6871	-
chr1	113124582	113124591	three_prime_UTR;LRIG2;protein_coding;ENSG00000198799.12	34.3292	+
chr1	113124594	113124603	three_prime_UTR;LRIG2;protein_coding;ENSG00000198799.12	11.1531	+
chr1	113124686	113124695	three_prime_UTR;LRIG2;protein_coding;ENSG00000198799.12	1.83741	+
chr1	113124762	113124771	three_prime_UTR;LRIG2;protein_coding;ENSG00000198799.12	4.59029	+
chr1	113761873	113761882	three_prime_UTR;RSBN1;protein_coding;ENSG00000081019.14	20.0144	-
chr1	113761972	113761981	three_prime_UTR;RSBN1;protein_coding;ENSG00000081019.14	148.453	-
chr1	113761991	113762000	three_prime_UTR;RSBN1;protein_coding;ENSG00000081019.14	11.4451	-
chr1	113762008	113762017	three_prime_UTR;RSBN1;protein_coding;ENSG00000081019.14	79.6808	-
chr1	113762021	113762030	three_prime_UTR;RSBN1;protein_coding;ENSG00000081019.14	1.18907	-
chr1	113765825	113765834	three_prime_UTR;RSBN1;protein_coding;ENSG00000081019.14	9.95182	-
chr1	113765891	113765900	three_prime_UTR;RSBN1;protein_coding;ENSG00000081019.14	18.1431	-
chr1	113765915	113765924	three_prime_UTR;RSBN1;protein_coding;ENSG00000081019.14	29.105	-
chr1	113777710	113777719	three_prime_UTR;RSBN1;protein_coding;ENSG00000081019.14	1.88578	-
chr1	113777731	113777740	three_prime_UTR;RSBN1;protein_coding;ENSG00000081019.14	2.89041	-
chr1	113777791	113777800	three_prime_UTR;RSBN1;protein_coding;ENSG00000081019.14	77.0282	-
chr1	113797372	113797381	CDS;RSBN1;protein_coding;ENSG00000081019.14	10.6257	-
chr1	113797562	113797571	CDS;RSBN1;protein_coding;ENSG00000081019.14	112.333	-
chr1	113797608	113797617	CDS;RSBN1;protein_coding;ENSG00000081019.14	3049.05	-
chr1	113797638	113797647	CDS;RSBN1;protein_coding;ENSG00000081019.14	175.587	-
chr1	113973701	113973710	three_prime_UTR;HIPK1;protein_coding;ENSG00000163349.22	11.302	+
chr1	113973990	113973999	three_prime_UTR;HIPK1;protein_coding;ENSG00000163349.22	10.5214	+
chr1	113974200	113974209	three_prime_UTR;HIPK1;protein_coding;ENSG00000163349.22	75.2802	+
chr1	113974516	113974525	three_prime_UTR;HIPK1;protein_coding;ENSG00000163349.22	29.8435	+
chr1	113974529	113974538	three_prime_UTR;HIPK1;protein_coding;ENSG00000163349.22	73.8775	+
chr1	113974597	113974606	three_prime_UTR;HIPK1;protein_coding;ENSG00000163349.22	5.37348	+
chr1	113974613	113974622	three_prime_UTR;HIPK1;protein_coding;ENSG00000163349.22	2.97282	+
chr1	113974733	113974742	three_prime_UTR;HIPK1;protein_coding;ENSG00000163349.22	9.7248	+
chr1	113974747	113974756	three_prime_UTR;HIPK1;protein_coding;ENSG00000163349.22	35.8501	+
chr1	113974829	113974838	three_prime_UTR;HIPK1;protein_coding;ENSG00000163349.22	19.0788	+
chr1	113974880	113974889	three_prime_UTR;HIPK1;protein_coding;ENSG00000163349.22	93.2288	+
chr1	113974962	113974971	three_prime_UTR;HIPK1;protein_coding;ENSG00000163349.22	61.9613	+
chr1	113975009	113975018	three_prime_UTR;HIPK1;protein_coding;ENSG00000163349.22	36.1859	+
chr1	113975071	113975080	three_prime_UTR;HIPK1;protein_coding;ENSG00000163349.22	56.0523	+
chr1	113975084	113975093	three_prime_UTR;HIPK1;protein_coding;ENSG00000163349.22	31.0746	+
chr1	113975094	113975103	three_prime_UTR;HIPK1;protein_coding;ENSG00000163349.22	41.2668	+
chr1	113975109	113975118	three_prime_UTR;HIPK1;protein_coding;ENSG00000163349.22	33.5227	+
chr1	113975128	113975137	three_prime_UTR;HIPK1;protein_coding;ENSG00000163349.22	25.8696	+
chr1	113975156	113975165	three_prime_UTR;HIPK1;protein_coding;ENSG00000163349.22	6.54353	+
chr1	113975182	113975191	three_prime_UTR;HIPK1;protein_coding;ENSG00000163349.22	7.85307	+
chr1	113975259	113975268	three_prime_UTR;HIPK1;protein_coding;ENSG00000163349.22	19.2201	+
chr1	113975271	113975280	three_prime_UTR;HIPK1;protein_coding;ENSG00000163349.22	2.52919	+
chr1	113975350	113975359	three_prime_UTR;HIPK1;protein_coding;ENSG00000163349.22	19.7813	+
chr1	113975382	113975391	three_prime_UTR;HIPK1;protein_coding;ENSG00000163349.22	3.75319	+
chr1	113975419	113975428	three_prime_UTR;HIPK1;protein_coding;ENSG00000163349.22	6.32878	+
chr1	113975442	113975451	three_prime_UTR;HIPK1;protein_coding;ENSG00000163349.22	0.995248	+
chr1	113975512	113975521	three_prime_UTR;HIPK1;protein_coding;ENSG00000163349.22	24.5415	+
chr1	113976192	113976201	three_prime_UTR;HIPK1;protein_coding;ENSG00000163349.22	26.1481	+
chr1	113976207	113976216	three_prime_UTR;HIPK1;protein_coding;ENSG00000163349.22	9.81355	+
chr1	113976220	113976229	three_prime_UTR;HIPK1;protein_coding;ENSG00000163349.22	13.5987	+
chr1	113976255	113976264	three_prime_UTR;HIPK1;protein_coding;ENSG00000163349.22	6.81756	+
chr1	113976284	113976293	three_prime_UTR;HIPK1;protein_coding;ENSG00000163349.22	16.4216	+
chr1	113976322	113976331	three_prime_UTR;HIPK1;protein_coding;ENSG00000163349.22	72.2135	+
chr1	113976399	113976408	three_prime_UTR;HIPK1;protein_coding;ENSG00000163349.22	81.5925	+
chr1	113976454	113976463	three_prime_UTR;HIPK1;protein_coding;ENSG00000163349.22	2.82692	+
chr1	113976733	113976742	three_prime_UTR;HIPK1;protein_coding;ENSG00000163349.22	35.4692	+
chr1	113976762	113976771	three_prime_UTR;HIPK1;protein_coding;ENSG00000163349.22	102.495	+
chr1	113976795	113976804	three_prime_UTR;HIPK1;protein_coding;ENSG00000163349.22	20.5152	+
chr1	113976917	113976926	three_prime_UTR;HIPK1;protein_coding;ENSG00000163349.22	5.74	+
chr1	113977233	113977242	three_prime_UTR;HIPK1;protein_coding;ENSG00000163349.22	22.149	+
chr1	113977243	113977252	three_prime_UTR;HIPK1;protein_coding;ENSG00000163349.22	93.8546	+
chr1	113977266	113977275	three_prime_UTR;HIPK1;protein_coding;ENSG00000163349.22	93.3634	+
chr1	113977381	113977390	three_prime_UTR;HIPK1;protein_coding;ENSG00000163349.22	20.3547	+
chr1	113977546	113977555	three_prime_UTR;HIPK1;protein_coding;ENSG00000163349.22	99.29	+
chr1	113977627	113977636	three_prime_UTR;HIPK1;protein_coding;ENSG00000163349.22	222.948	+
chr1	113977637	113977646	three_prime_UTR;HIPK1;protein_coding;ENSG00000163349.22	76.5471	+
chr1	113977668	113977677	three_prime_UTR;HIPK1;protein_coding;ENSG00000163349.22	573.257	+
chr1	113977678	113977687	three_prime_UTR;HIPK1;protein_coding;ENSG00000163349.22	53.382	+
chr1	113977689	113977698	three_prime_UTR;HIPK1;protein_coding;ENSG00000163349.22	1173.2	+
chr1	113977720	113977729	three_prime_UTR;HIPK1;protein_coding;ENSG00000163349.22	11.1507	+
chr1	114392848	114392857	three_prime_UTR;TRIM33;protein_coding;ENSG00000197323.12	12.359	-
chr1	114392871	114392880	three_prime_UTR;TRIM33;protein_coding;ENSG00000197323.12	8.22846	-
chr1	114392882	114392891	three_prime_UTR;TRIM33;protein_coding;ENSG00000197323.12	13.6425	-
chr1	114392924	114392933	three_prime_UTR;TRIM33;protein_coding;ENSG00000197323.12	15.0635	-
chr1	114396508	114396517	three_prime_UTR;TRIM33;protein_coding;ENSG00000197323.12	13.6785	-
chr1	114396527	114396536	three_prime_UTR;TRIM33;protein_coding;ENSG00000197323.12	3.05991	-
chr1	114396596	114396605	three_prime_UTR;TRIM33;protein_coding;ENSG00000197323.12	17.1145	-
chr1	114396614	114396623	three_prime_UTR;TRIM33;protein_coding;ENSG00000197323.12	13.5173	-
chr1	114396646	114396655	three_prime_UTR;TRIM33;protein_coding;ENSG00000197323.12	254.809	-
chr1	114396672	114396681	three_prime_UTR;TRIM33;protein_coding;ENSG00000197323.12	112.041	-
chr1	114396691	114396700	three_prime_UTR;TRIM33;protein_coding;ENSG00000197323.12	30.5707	-
chr1	114707309	114707318	three_prime_UTR;NRAS;protein_coding;ENSG00000213281.5	14.8489	-
chr1	114717479	114717488	three_prime_UTR;CSDE1;protein_coding;ENSG00000009307.17	4.31739	-
chr1	114717644	114717653	three_prime_UTR;CSDE1;protein_coding;ENSG00000009307.17	3.10142	-
chr1	114717668	114717677	three_prime_UTR;CSDE1;protein_coding;ENSG00000009307.17	8.93372	-
chr1	114749886	114749895	five_prime_UTR;CSDE1;protein_coding;ENSG00000009307.17	12.6773	-
chr1	114749909	114749918	five_prime_UTR;CSDE1;protein_coding;ENSG00000009307.17	24.7289	-
chr1	114749947	114749956	five_prime_UTR;CSDE1;protein_coding;ENSG00000009307.17	28.6918	-
chr1	114749974	114749983	five_prime_UTR;CSDE1;protein_coding;ENSG00000009307.17	8.76912	-
chr1	114749997	114750006	five_prime_UTR;CSDE1;protein_coding;ENSG00000009307.17	31.2233	-
chr1	114769562	114769571	three_prime_UTR;SIKE1;protein_coding;ENSG00000052723.12	45.9611	-
chr1	114769585	114769594	three_prime_UTR;SIKE1;protein_coding;ENSG00000052723.12	12.2152	-
chr1	116387385	116387394	CDS;ATP1A1;protein_coding;ENSG00000163399.16	25.8595	+
chr1	116387430	116387439	CDS;ATP1A1;protein_coding;ENSG00000163399.16	30.7869	+
chr1	116404648	116404657	three_prime_UTR;ATP1A1;protein_coding;ENSG00000163399.16	19.1857	+
chr1	116404665	116404674	three_prime_UTR;ATP1A1;protein_coding;ENSG00000163399.16	90.7671	+
chr1	116404685	116404694	three_prime_UTR;ATP1A1;protein_coding;ENSG00000163399.16	15.5376	+
chr1	116514598	116514607	three_prime_UTR;CD58;protein_coding;ENSG00000116815.16	53.4139	-
chr1	116514641	116514650	three_prime_UTR;CD58;protein_coding;ENSG00000116815.16	30.1889	-
chr1	116754507	116754516	CDS;CD2;protein_coding;ENSG00000116824.5	3.95075	+
chr1	116754651	116754660	CDS;CD2;protein_coding;ENSG00000116824.5	110.503	+
chr1	116754685	116754694	CDS;CD2;protein_coding;ENSG00000116824.5	2.23981	+
chr1	116769020	116769029	three_prime_UTR;CD2;protein_coding;ENSG00000116824.5	56.2172	+
chr1	116769047	116769056	three_prime_UTR;CD2;protein_coding;ENSG00000116824.5	29.5369	+
chr1	116769057	116769066	three_prime_UTR;CD2;protein_coding;ENSG00000116824.5	14.6949	+
chr1	116769072	116769081	three_prime_UTR;CD2;protein_coding;ENSG00000116824.5	2.13635	+
chr1	116769103	116769112	three_prime_UTR;CD2;protein_coding;ENSG00000116824.5	4.28978	+
chr1	116769120	116769129	three_prime_UTR;CD2;protein_coding;ENSG00000116824.5	7.14886	+
chr1	116769132	116769141	three_prime_UTR;CD2;protein_coding;ENSG00000116824.5	12.8872	+
chr1	116769156	116769165	three_prime_UTR;CD2;protein_coding;ENSG00000116824.5	5.88535	+
chr1	121392400	121392409	three_prime_UTR;SRGAP2C;protein_coding;ENSG00000171943.12	8.07024	+
chr1	144454995	144455004	intron;NBPF15;protein_coding;ENSG00000266338.7	4.45255	-
chr1	144455010	144455019	intron;NBPF15;protein_coding;ENSG00000266338.7	40.8444	-
chr1	144455025	144455034	intron;NBPF15;protein_coding;ENSG00000266338.7	14.8036	-
chr1	144455037	144455046	intron;NBPF15;protein_coding;ENSG00000266338.7	14.9371	-
chr1	144455308	144455317	intron;NBPF15;protein_coding;ENSG00000266338.7	37.0933	-
chr1	145849214	145849223	three_prime_UTR;PIAS3;protein_coding;ENSG00000131788.16	6.24485	-
chr1	145849250	145849259	three_prime_UTR;PIAS3;protein_coding;ENSG00000131788.16	57.5187	-
chr1	145854860	145854869	CDS;PIAS3;protein_coding;ENSG00000131788.16	21.6698	-
chr1	145855765	145855774	CDS;PIAS3;protein_coding;ENSG00000131788.16	17.0704	-
chr1	145855819	145855828	CDS;PIAS3;protein_coding;ENSG00000131788.16	883.76	-
chr1	145856093	145856102	CDS;PIAS3;protein_coding;ENSG00000131788.16	244.481	-
chr1	145856108	145856117	CDS;PIAS3;protein_coding;ENSG00000131788.16	1.67421	-
chr1	145911428	145911437	three_prime_UTR;PEX11B;protein_coding;ENSG00000131779.11	4.59348	-
chr1	145911485	145911494	three_prime_UTR;PEX11B;protein_coding;ENSG00000131779.11	23.2443	-
chr1	145911499	145911508	three_prime_UTR;PEX11B;protein_coding;ENSG00000131779.11	36.4898	-
chr1	145911522	145911531	three_prime_UTR;PEX11B;protein_coding;ENSG00000131779.11	15.7779	-
chr1	145911843	145911852	three_prime_UTR;PEX11B;protein_coding;ENSG00000131779.11	27.3419	-
chr1	145911873	145911882	three_prime_UTR;PEX11B;protein_coding;ENSG00000131779.11	14.4679	-
chr1	145911895	145911904	three_prime_UTR;PEX11B;protein_coding;ENSG00000131779.11	6.13007	-
chr1	145911924	145911933	three_prime_UTR;PEX11B;protein_coding;ENSG00000131779.11	9.22411	-
chr1	145934142	145934151	three_prime_UTR;LIX1L;protein_coding;ENSG00000271601.4	7.70076	-
chr1	145935342	145935351	three_prime_UTR;LIX1L;protein_coding;ENSG00000271601.4	19.3224	-
chr1	145935361	145935370	three_prime_UTR;LIX1L;protein_coding;ENSG00000271601.4	41.402	-
chr1	145936065	145936074	three_prime_UTR;LIX1L;protein_coding;ENSG00000271601.4	11.3875	-
chr1	145936089	145936098	three_prime_UTR;LIX1L;protein_coding;ENSG00000271601.4	3.02525	-
chr1	145936137	145936146	three_prime_UTR;LIX1L;protein_coding;ENSG00000271601.4	8.62154	-
chr1	145936211	145936220	three_prime_UTR;LIX1L;protein_coding;ENSG00000271601.4	142.446	-
chr1	145936231	145936240	three_prime_UTR;LIX1L;protein_coding;ENSG00000271601.4	88.5581	-
chr1	145936249	145936258	three_prime_UTR;LIX1L;protein_coding;ENSG00000271601.4	20.677	-
chr1	145936265	145936274	three_prime_UTR;LIX1L;protein_coding;ENSG00000271601.4	310.625	-
chr1	145978749	145978758	three_prime_UTR;POLR3GL;protein_coding;ENSG00000121851.13	137.733	+
chr1	145992495	145992504	three_prime_UTR;TXNIP;protein_coding;ENSG00000265972.6	246.345	-
chr1	145992517	145992526	three_prime_UTR;TXNIP;protein_coding;ENSG00000265972.6	170.558	-
chr1	145992536	145992545	three_prime_UTR;TXNIP;protein_coding;ENSG00000265972.6	146.877	-
chr1	145992594	145992603	three_prime_UTR;TXNIP;protein_coding;ENSG00000265972.6	65.771	-
chr1	145992672	145992681	three_prime_UTR;TXNIP;protein_coding;ENSG00000265972.6	2.46736	-
chr1	145992723	145992732	three_prime_UTR;TXNIP;protein_coding;ENSG00000265972.6	6.98672	-
chr1	145992743	145992752	three_prime_UTR;TXNIP;protein_coding;ENSG00000265972.6	14.3221	-
chr1	145992893	145992902	three_prime_UTR;TXNIP;protein_coding;ENSG00000265972.6	31.4785	-
chr1	145993029	145993038	three_prime_UTR;TXNIP;protein_coding;ENSG00000265972.6	43.8397	-
chr1	145993084	145993093	three_prime_UTR;TXNIP;protein_coding;ENSG00000265972.6	12.6915	-
chr1	145993117	145993126	three_prime_UTR;TXNIP;protein_coding;ENSG00000265972.6	14.3084	-
chr1	145993158	145993167	three_prime_UTR;TXNIP;protein_coding;ENSG00000265972.6	5.89272	-
chr1	145993379	145993388	three_prime_UTR;TXNIP;protein_coding;ENSG00000265972.6	19.5718	-
chr1	145993392	145993401	three_prime_UTR;TXNIP;protein_coding;ENSG00000265972.6	6.67999	-
chr1	145993479	145993488	three_prime_UTR;TXNIP;protein_coding;ENSG00000265972.6	22.6202	-
chr1	145993494	145993503	three_prime_UTR;TXNIP;protein_coding;ENSG00000265972.6	22.3067	-
chr1	145993517	145993526	three_prime_UTR;TXNIP;protein_coding;ENSG00000265972.6	11.5459	-
chr1	145993542	145993551	three_prime_UTR;TXNIP;protein_coding;ENSG00000265972.6	16.2847	-
chr1	145993690	145993699	three_prime_UTR;TXNIP;protein_coding;ENSG00000265972.6	21.9311	-
chr1	145993713	145993722	three_prime_UTR;TXNIP;protein_coding;ENSG00000265972.6	14.478	-
chr1	145993752	145993761	three_prime_UTR;TXNIP;protein_coding;ENSG00000265972.6	12.1475	-
chr1	145993767	145993776	three_prime_UTR;TXNIP;protein_coding;ENSG00000265972.6	15.6982	-
chr1	145993803	145993812	three_prime_UTR;TXNIP;protein_coding;ENSG00000265972.6	13.7267	-
chr1	145996290	145996299	five_prime_UTR;TXNIP;protein_coding;ENSG00000265972.6	6.4398	-
chr1	145996307	145996316	five_prime_UTR;TXNIP;protein_coding;ENSG00000265972.6	16.7883	-
chr1	145996323	145996332	five_prime_UTR;TXNIP;protein_coding;ENSG00000265972.6	4.49424	-
chr1	145996361	145996370	five_prime_UTR;TXNIP;protein_coding;ENSG00000265972.6	7.10255	-
chr1	145996401	145996410	five_prime_UTR;TXNIP;protein_coding;ENSG00000265972.6	23.1062	-
chr1	145996459	145996468	five_prime_UTR;TXNIP;protein_coding;ENSG00000265972.6	40.0712	-
chr1	145996474	145996483	five_prime_UTR;TXNIP;protein_coding;ENSG00000265972.6	2.09741	-
chr1	145996514	145996523	five_prime_UTR;TXNIP;protein_coding;ENSG00000265972.6	11.2866	-
chr1	145996560	145996569	five_prime_UTR;TXNIP;protein_coding;ENSG00000265972.6	10.5414	-
chr1	149812262	149812271	CDS;H2BC18;protein_coding;ENSG00000203814.7	10.7702	-
chr1	149812370	149812379	five_prime_UTR;H2BC18;protein_coding;ENSG00000203814.7	310.74	-
chr1	149813327	149813336	CDS;H3C13;protein_coding;ENSG00000183598.4	24.1805	-
chr1	149886240	149886249	three_prime_UTR;H2BC21;protein_coding;ENSG00000184678.11	3.80964	-
chr1	149886639	149886648	start_codon;H2BC21;protein_coding;ENSG00000184678.11	31.6895	-
chr1	149886922	149886931	five_prime_UTR;H2AC20;protein_coding;ENSG00000184260.6	164.865	+
chr1	149886933	149886942	five_prime_UTR;H2AC20;protein_coding;ENSG00000184260.6	16.9314	+
chr1	149887302	149887311	CDS;H2AC20;protein_coding;ENSG00000184260.6	6.19225	+
chr1	149887320	149887329	CDS;H2AC20;protein_coding;ENSG00000184260.6	9.49326	+
chr1	149887624	149887633	CDS;H2AC21;protein_coding;ENSG00000184270.6	8.76103	-
chr1	149887920	149887929	five_prime_UTR;H2AC21;protein_coding;ENSG00000184270.6	71.0902	-
chr1	149887932	149887941	five_prime_UTR;H2AC21;protein_coding;ENSG00000184270.6	21.1908	-
chr1	149887961	149887970	five_prime_UTR;H2AC21;protein_coding;ENSG00000184270.6	539.691	-
chr1	149925832	149925841	intron;SF3B4;protein_coding;ENSG00000143368.10	114.511	-
chr1	150218664	150218673	three_prime_UTR;ANP32E;protein_coding;ENSG00000143401.15	21.3763	-
chr1	150235899	150235908	five_prime_UTR;ANP32E;protein_coding;ENSG00000143401.15	21.8551	-
chr1	150235918	150235927	five_prime_UTR;ANP32E;protein_coding;ENSG00000143401.15	6.32233	-
chr1	150265473	150265482	three_prime_UTR;APH1A;protein_coding;ENSG00000117362.13	27.4337	-
chr1	150265514	150265523	three_prime_UTR;APH1A;protein_coding;ENSG00000117362.13	8.69353	-
chr1	150265525	150265534	three_prime_UTR;APH1A;protein_coding;ENSG00000117362.13	49.4507	-
chr1	150472479	150472488	CDS;RPRD2;protein_coding;ENSG00000163125.16	1.73897	+
chr1	150472500	150472509	CDS;RPRD2;protein_coding;ENSG00000163125.16	97.0733	+
chr1	150574606	150574615	three_prime_UTR;MCL1;protein_coding;ENSG00000143384.14	6.62617	-
chr1	150574620	150574629	three_prime_UTR;MCL1;protein_coding;ENSG00000143384.14	43.2264	-
chr1	150574671	150574680	three_prime_UTR;MCL1;protein_coding;ENSG00000143384.14	53.6652	-
chr1	150574687	150574696	three_prime_UTR;MCL1;protein_coding;ENSG00000143384.14	298.747	-
chr1	150574697	150574706	three_prime_UTR;MCL1;protein_coding;ENSG00000143384.14	285.412	-
chr1	150574716	150574725	three_prime_UTR;MCL1;protein_coding;ENSG00000143384.14	116.8	-
chr1	150574729	150574738	three_prime_UTR;MCL1;protein_coding;ENSG00000143384.14	4.61214	-
chr1	150574769	150574778	three_prime_UTR;MCL1;protein_coding;ENSG00000143384.14	132.088	-
chr1	150575128	150575137	three_prime_UTR;MCL1;protein_coding;ENSG00000143384.14	12.5144	-
chr1	150575172	150575181	three_prime_UTR;MCL1;protein_coding;ENSG00000143384.14	8.94348	-
chr1	150575187	150575196	three_prime_UTR;MCL1;protein_coding;ENSG00000143384.14	2.75492	-
chr1	150575412	150575421	three_prime_UTR;MCL1;protein_coding;ENSG00000143384.14	1.87194	-
chr1	150575450	150575459	three_prime_UTR;MCL1;protein_coding;ENSG00000143384.14	8.5147	-
chr1	150575474	150575483	three_prime_UTR;MCL1;protein_coding;ENSG00000143384.14	1.96001	-
chr1	150575500	150575509	three_prime_UTR;MCL1;protein_coding;ENSG00000143384.14	41.3818	-
chr1	150575518	150575527	three_prime_UTR;MCL1;protein_coding;ENSG00000143384.14	13.1578	-
chr1	150575566	150575575	three_prime_UTR;MCL1;protein_coding;ENSG00000143384.14	44.662	-
chr1	150575755	150575764	three_prime_UTR;MCL1;protein_coding;ENSG00000143384.14	26.964	-
chr1	150575835	150575844	three_prime_UTR;MCL1;protein_coding;ENSG00000143384.14	3.70759	-
chr1	150575872	150575881	three_prime_UTR;MCL1;protein_coding;ENSG00000143384.14	159.306	-
chr1	150575889	150575898	three_prime_UTR;MCL1;protein_coding;ENSG00000143384.14	22.1763	-
chr1	150575928	150575937	three_prime_UTR;MCL1;protein_coding;ENSG00000143384.14	19.7609	-
chr1	150576032	150576041	three_prime_UTR;MCL1;protein_coding;ENSG00000143384.14	26.7663	-
chr1	150576060	150576069	three_prime_UTR;MCL1;protein_coding;ENSG00000143384.14	1.6723	-
chr1	150576075	150576084	three_prime_UTR;MCL1;protein_coding;ENSG00000143384.14	23.1182	-
chr1	150576158	150576167	three_prime_UTR;MCL1;protein_coding;ENSG00000143384.14	33.9996	-
chr1	150576174	150576183	three_prime_UTR;MCL1;protein_coding;ENSG00000143384.14	2.82069	-
chr1	150576219	150576228	three_prime_UTR;MCL1;protein_coding;ENSG00000143384.14	17.6244	-
chr1	150576236	150576245	three_prime_UTR;MCL1;protein_coding;ENSG00000143384.14	78.4177	-
chr1	150576260	150576269	three_prime_UTR;MCL1;protein_coding;ENSG00000143384.14	228.198	-
chr1	150576287	150576296	three_prime_UTR;MCL1;protein_coding;ENSG00000143384.14	62.0143	-
chr1	150576335	150576344	three_prime_UTR;MCL1;protein_coding;ENSG00000143384.14	47.6656	-
chr1	150576397	150576406	three_prime_UTR;MCL1;protein_coding;ENSG00000143384.14	52.8379	-
chr1	150576413	150576422	three_prime_UTR;MCL1;protein_coding;ENSG00000143384.14	19.833	-
chr1	150576426	150576435	three_prime_UTR;MCL1;protein_coding;ENSG00000143384.14	35.4583	-
chr1	150576437	150576446	three_prime_UTR;MCL1;protein_coding;ENSG00000143384.14	104.409	-
chr1	150576453	150576462	three_prime_UTR;MCL1;protein_coding;ENSG00000143384.14	76.2782	-
chr1	150576553	150576562	three_prime_UTR;MCL1;protein_coding;ENSG00000143384.14	52.926	-
chr1	150576666	150576675	three_prime_UTR;MCL1;protein_coding;ENSG00000143384.14	154.95	-
chr1	150576711	150576720	three_prime_UTR;MCL1;protein_coding;ENSG00000143384.14	390.3	-
chr1	150576733	150576742	three_prime_UTR;MCL1;protein_coding;ENSG00000143384.14	556.516	-
chr1	150576758	150576767	three_prime_UTR;MCL1;protein_coding;ENSG00000143384.14	68.8096	-
chr1	150576830	150576839	three_prime_UTR;MCL1;protein_coding;ENSG00000143384.14	226.342	-
chr1	150576857	150576866	three_prime_UTR;MCL1;protein_coding;ENSG00000143384.14	2.70429	-
chr1	150577015	150577024	three_prime_UTR;MCL1;protein_coding;ENSG00000143384.14	14.9404	-
chr1	150577102	150577111	three_prime_UTR;MCL1;protein_coding;ENSG00000143384.14	19.5272	-
chr1	150577217	150577226	three_prime_UTR;MCL1;protein_coding;ENSG00000143384.14	3.86035	-
chr1	150577310	150577319	three_prime_UTR;MCL1;protein_coding;ENSG00000143384.14	3.24673	-
chr1	150647032	150647041	three_prime_UTR;GOLPH3L;protein_coding;ENSG00000143457.11	15.3533	-
chr1	150647045	150647054	three_prime_UTR;GOLPH3L;protein_coding;ENSG00000143457.11	100.408	-
chr1	150842503	150842512	intron;ARNT;protein_coding;ENSG00000143437.21	6.64523	-
chr1	150965327	150965336	three_prime_UTR;CERS2;protein_coding;ENSG00000143418.20	4.02075	-
chr1	150965363	150965372	three_prime_UTR;CERS2;protein_coding;ENSG00000143418.20	89.3766	-
chr1	150965375	150965384	three_prime_UTR;CERS2;protein_coding;ENSG00000143418.20	61.8645	-
chr1	150965389	150965398	three_prime_UTR;CERS2;protein_coding;ENSG00000143418.20	55.8301	-
chr1	151051059	151051068	three_prime_UTR;CDC42SE1;protein_coding;ENSG00000197622.13	2.36548	-
chr1	151051395	151051404	three_prime_UTR;CDC42SE1;protein_coding;ENSG00000197622.13	31.4977	-
chr1	151051607	151051616	three_prime_UTR;CDC42SE1;protein_coding;ENSG00000197622.13	24.9757	-
chr1	151051661	151051670	three_prime_UTR;CDC42SE1;protein_coding;ENSG00000197622.13	7.82222	-
chr1	151051753	151051762	three_prime_UTR;CDC42SE1;protein_coding;ENSG00000197622.13	124.747	-
chr1	151051780	151051789	three_prime_UTR;CDC42SE1;protein_coding;ENSG00000197622.13	82.9293	-
chr1	151051791	151051800	three_prime_UTR;CDC42SE1;protein_coding;ENSG00000197622.13	59.8192	-
chr1	151052025	151052034	three_prime_UTR;CDC42SE1;protein_coding;ENSG00000197622.13	5.008	-
chr1	151052047	151052056	three_prime_UTR;CDC42SE1;protein_coding;ENSG00000197622.13	4.92625	-
chr1	151052058	151052067	three_prime_UTR;CDC42SE1;protein_coding;ENSG00000197622.13	1.13241	-
chr1	151052078	151052087	three_prime_UTR;CDC42SE1;protein_coding;ENSG00000197622.13	9.67772	-
chr1	151052093	151052102	three_prime_UTR;CDC42SE1;protein_coding;ENSG00000197622.13	56.4074	-
chr1	151052226	151052235	three_prime_UTR;CDC42SE1;protein_coding;ENSG00000197622.13	22.0746	-
chr1	151052237	151052246	three_prime_UTR;CDC42SE1;protein_coding;ENSG00000197622.13	8.15409	-
chr1	151052540	151052549	three_prime_UTR;CDC42SE1;protein_coding;ENSG00000197622.13	34.9569	-
chr1	151052640	151052649	three_prime_UTR;CDC42SE1;protein_coding;ENSG00000197622.13	12.207	-
chr1	151052657	151052666	three_prime_UTR;CDC42SE1;protein_coding;ENSG00000197622.13	8.85678	-
chr1	151052674	151052683	three_prime_UTR;CDC42SE1;protein_coding;ENSG00000197622.13	7.7533	-
chr1	151052697	151052706	three_prime_UTR;CDC42SE1;protein_coding;ENSG00000197622.13	1.20092	-
chr1	151052716	151052725	three_prime_UTR;CDC42SE1;protein_coding;ENSG00000197622.13	91.0772	-
chr1	151052749	151052758	three_prime_UTR;CDC42SE1;protein_coding;ENSG00000197622.13	19.0742	-
chr1	151052803	151052812	three_prime_UTR;CDC42SE1;protein_coding;ENSG00000197622.13	2.3074	-
chr1	151052931	151052940	three_prime_UTR;CDC42SE1;protein_coding;ENSG00000197622.13	2.47549	-
chr1	151052941	151052950	three_prime_UTR;CDC42SE1;protein_coding;ENSG00000197622.13	8.82276	-
chr1	151052968	151052977	three_prime_UTR;CDC42SE1;protein_coding;ENSG00000197622.13	19.7923	-
chr1	151052984	151052993	three_prime_UTR;CDC42SE1;protein_coding;ENSG00000197622.13	7.36005	-
chr1	151053299	151053308	three_prime_UTR;CDC42SE1;protein_coding;ENSG00000197622.13	4.64426	-
chr1	151054232	151054241	three_prime_UTR;CDC42SE1;protein_coding;ENSG00000197622.13	53.1084	-
chr1	151054246	151054255	stop_codon;CDC42SE1;protein_coding;ENSG00000197622.13	51.2577	-
chr1	151054267	151054276	CDS;CDC42SE1;protein_coding;ENSG00000197622.13	68.1097	-
chr1	151055020	151055029	CDS;CDC42SE1;protein_coding;ENSG00000197622.13	6.76113	-
chr1	151055199	151055208	exon;CDC42SE1;protein_coding;ENSG00000197622.13	4.83449	-
chr1	151055294	151055303	exon;CDC42SE1;protein_coding;ENSG00000197622.13	12.0723	-
chr1	151055348	151055357	exon;CDC42SE1;protein_coding;ENSG00000197622.13	4.76563	-
chr1	151055365	151055374	exon;CDC42SE1;protein_coding;ENSG00000197622.13	4.81774	-
chr1	151055397	151055406	exon;CDC42SE1;protein_coding;ENSG00000197622.13	4.03562	-
chr1	151055408	151055417	exon;CDC42SE1;protein_coding;ENSG00000197622.13	1.59065	-
chr1	151055453	151055462	exon;CDC42SE1;protein_coding;ENSG00000197622.13	4.86223	-
chr1	151055464	151055473	exon;CDC42SE1;protein_coding;ENSG00000197622.13	2.34944	-
chr1	151176524	151176533	three_prime_UTR;VPS72;protein_coding;ENSG00000163159.15	11.2099	-
chr1	151248224	151248233	three_prime_UTR;PIP5K1A;protein_coding;ENSG00000143398.20	2.91632	+
chr1	151248252	151248261	three_prime_UTR;PIP5K1A;protein_coding;ENSG00000143398.20	33.0416	+
chr1	151248361	151248370	three_prime_UTR;PIP5K1A;protein_coding;ENSG00000143398.20	9.38853	+
chr1	151248590	151248599	three_prime_UTR;PIP5K1A;protein_coding;ENSG00000143398.20	20.8986	+
chr1	151248623	151248632	three_prime_UTR;PIP5K1A;protein_coding;ENSG00000143398.20	45.8596	+
chr1	151248637	151248646	three_prime_UTR;PIP5K1A;protein_coding;ENSG00000143398.20	13.1145	+
chr1	151248815	151248824	three_prime_UTR;PIP5K1A;protein_coding;ENSG00000143398.20	29.7666	+
chr1	151249005	151249014	three_prime_UTR;PIP5K1A;protein_coding;ENSG00000143398.20	25.9373	+
chr1	151249084	151249093	three_prime_UTR;PIP5K1A;protein_coding;ENSG00000143398.20	4.44671	+
chr1	151249148	151249157	three_prime_UTR;PIP5K1A;protein_coding;ENSG00000143398.20	9.86141	+
chr1	151249182	151249191	three_prime_UTR;PIP5K1A;protein_coding;ENSG00000143398.20	74.1453	+
chr1	151249201	151249210	three_prime_UTR;PIP5K1A;protein_coding;ENSG00000143398.20	394.653	+
chr1	151249212	151249221	three_prime_UTR;PIP5K1A;protein_coding;ENSG00000143398.20	152.706	+
chr1	151249332	151249341	three_prime_UTR;PIP5K1A;protein_coding;ENSG00000143398.20	3.57524	+
chr1	151249381	151249390	three_prime_UTR;PIP5K1A;protein_coding;ENSG00000143398.20	646.016	+
chr1	151249394	151249403	three_prime_UTR;PIP5K1A;protein_coding;ENSG00000143398.20	227.726	+
chr1	151249419	151249428	three_prime_UTR;PIP5K1A;protein_coding;ENSG00000143398.20	288.221	+
chr1	151249435	151249444	three_prime_UTR;PIP5K1A;protein_coding;ENSG00000143398.20	12.1101	+
chr1	151401619	151401628	CDS;PSMB4;protein_coding;ENSG00000159377.11	15.2185	+
chr1	151401825	151401834	CDS;PSMB4;protein_coding;ENSG00000159377.11	137.618	+
chr1	151401838	151401847	three_prime_UTR;PSMB4;protein_coding;ENSG00000159377.11	48.2993	+
chr1	151401876	151401885	three_prime_UTR;PSMB4;protein_coding;ENSG00000159377.11	20.5996	+
chr1	151401892	151401901	three_prime_UTR;PSMB4;protein_coding;ENSG00000159377.11	28.5624	+
chr1	151694877	151694886	three_prime_UTR;SNX27;protein_coding;ENSG00000143376.14	4.52134	+
chr1	151696441	151696450	three_prime_UTR;SNX27;protein_coding;ENSG00000143376.14	47.4587	+
chr1	151696494	151696503	three_prime_UTR;SNX27;protein_coding;ENSG00000143376.14	8.32826	+
chr1	151696557	151696566	three_prime_UTR;SNX27;protein_coding;ENSG00000143376.14	9.83375	+
chr1	151696578	151696587	three_prime_UTR;SNX27;protein_coding;ENSG00000143376.14	1.372	+
chr1	151696653	151696662	three_prime_UTR;SNX27;protein_coding;ENSG00000143376.14	10.8481	+
chr1	151696663	151696672	three_prime_UTR;SNX27;protein_coding;ENSG00000143376.14	39.6853	+
chr1	151696675	151696684	three_prime_UTR;SNX27;protein_coding;ENSG00000143376.14	15.4801	+
chr1	151697724	151697733	three_prime_UTR;SNX27;protein_coding;ENSG00000143376.14	23.7098	+
chr1	151697734	151697743	three_prime_UTR;SNX27;protein_coding;ENSG00000143376.14	36.7846	+
chr1	151697774	151697783	three_prime_UTR;SNX27;protein_coding;ENSG00000143376.14	12.4912	+
chr1	151698970	151698979	three_prime_UTR;SNX27;protein_coding;ENSG00000143376.14	38.9193	+
chr1	151698981	151698990	three_prime_UTR;SNX27;protein_coding;ENSG00000143376.14	25.2066	+
chr1	151699003	151699012	three_prime_UTR;SNX27;protein_coding;ENSG00000143376.14	4.40431	+
chr1	151699021	151699030	three_prime_UTR;SNX27;protein_coding;ENSG00000143376.14	2.2629	+
chr1	151983076	151983085	three_prime_UTR;S100A10;protein_coding;ENSG00000197747.9	26.5835	-
chr1	152032608	152032617	three_prime_UTR;S100A11;protein_coding;ENSG00000163191.6	66.4508	-
chr1	152032622	152032631	three_prime_UTR;S100A11;protein_coding;ENSG00000163191.6	36.6796	-
chr1	152032649	152032658	three_prime_UTR;S100A11;protein_coding;ENSG00000163191.6	1.93133	-
chr1	152032683	152032692	CDS;S100A11;protein_coding;ENSG00000163191.6	8.77141	-
chr1	152032723	152032732	CDS;S100A11;protein_coding;ENSG00000163191.6	1.60685	-
chr1	152032769	152032778	CDS;S100A11;protein_coding;ENSG00000163191.6	5.66534	-
chr1	152032782	152032791	CDS;S100A11;protein_coding;ENSG00000163191.6	11.4591	-
chr1	152032819	152032828	CDS;S100A11;protein_coding;ENSG00000163191.6	7.32969	-
chr1	152033729	152033738	CDS;S100A11;protein_coding;ENSG00000163191.6	14.5423	-
chr1	152033740	152033749	CDS;S100A11;protein_coding;ENSG00000163191.6	9.08812	-
chr1	152033752	152033761	CDS;S100A11;protein_coding;ENSG00000163191.6	26.7276	-
chr1	153534745	153534754	CDS;S100A6;protein_coding;ENSG00000197956.10	20.1409	-
chr1	153534808	153534817	CDS;S100A6;protein_coding;ENSG00000197956.10	19.9051	-
chr1	153543721	153543730	three_prime_UTR;S100A4;protein_coding;ENSG00000196154.12	29.6412	-
chr1	153543749	153543758	three_prime_UTR;S100A4;protein_coding;ENSG00000196154.12	10.0144	-
chr1	153543777	153543786	CDS;S100A4;protein_coding;ENSG00000196154.12	4.3776	-
chr1	153543791	153543800	CDS;S100A4;protein_coding;ENSG00000196154.12	44.5685	-
chr1	153544691	153544700	CDS;S100A4;protein_coding;ENSG00000196154.12	138.516	-
chr1	153544717	153544726	CDS;S100A4;protein_coding;ENSG00000196154.12	20.0342	-
chr1	153544733	153544742	CDS;S100A4;protein_coding;ENSG00000196154.12	289.006	-
chr1	153544771	153544780	CDS;S100A4;protein_coding;ENSG00000196154.12	47.916	-
chr1	153544796	153544805	five_prime_UTR;S100A4;protein_coding;ENSG00000196154.12	12.3219	-
chr1	153637144	153637153	exon;CHTOP;protein_coding;ENSG00000160679.13	89.3648	+
chr1	153637160	153637169	exon;CHTOP;protein_coding;ENSG00000160679.13	79.2684	+
chr1	153637758	153637767	exon;CHTOP;protein_coding;ENSG00000160679.13	27.0681	+
chr1	153637784	153637793	exon;CHTOP;protein_coding;ENSG00000160679.13	25.7709	+
chr1	153637801	153637810	exon;CHTOP;protein_coding;ENSG00000160679.13	23.4044	+
chr1	153637814	153637823	exon;CHTOP;protein_coding;ENSG00000160679.13	32.188	+
chr1	153637843	153637852	exon;CHTOP;protein_coding;ENSG00000160679.13	19.5631	+
chr1	153637857	153637866	exon;CHTOP;protein_coding;ENSG00000160679.13	14.7274	+
chr1	153645484	153645493	three_prime_UTR;CHTOP;protein_coding;ENSG00000160679.13	24.5331	+
chr1	153661442	153661451	three_prime_UTR;SNAPIN;protein_coding;ENSG00000143553.11	13.1645	+
chr1	153662088	153662097	three_prime_UTR;ILF2;protein_coding;ENSG00000143621.17	2157.27	-
chr1	153662100	153662109	three_prime_UTR;ILF2;protein_coding;ENSG00000143621.17	102.237	-
chr1	153662112	153662121	three_prime_UTR;ILF2;protein_coding;ENSG00000143621.17	655.885	-
chr1	153662323	153662332	three_prime_UTR;ILF2;protein_coding;ENSG00000143621.17	111.264	-
chr1	153662333	153662342	three_prime_UTR;ILF2;protein_coding;ENSG00000143621.17	5.76793	-
chr1	153662385	153662394	three_prime_UTR;ILF2;protein_coding;ENSG00000143621.17	4.8352	-
chr1	153670188	153670197	five_prime_UTR;ILF2;protein_coding;ENSG00000143621.17	35.4086	-
chr1	153670217	153670226	five_prime_UTR;ILF2;protein_coding;ENSG00000143621.17	5.8719	-
chr1	153670930	153670939	five_prime_UTR;ILF2;protein_coding;ENSG00000143621.17	81.9432	-
chr1	153764142	153764151	three_prime_UTR;INTS3;protein_coding;ENSG00000143624.14	101.492	+
chr1	153764181	153764190	three_prime_UTR;INTS3;protein_coding;ENSG00000143624.14	228.77	+
chr1	153764197	153764206	three_prime_UTR;INTS3;protein_coding;ENSG00000143624.14	210.149	+
chr1	153764208	153764217	three_prime_UTR;INTS3;protein_coding;ENSG00000143624.14	386.028	+
chr1	153764723	153764732	three_prime_UTR;INTS3;protein_coding;ENSG00000143624.14	111.897	+
chr1	153764977	153764986	three_prime_UTR;INTS3;protein_coding;ENSG00000143624.14	18.5501	+
chr1	153806647	153806656	three_prime_UTR;GATAD2B;protein_coding;ENSG00000143614.10	29.4495	-
chr1	153806675	153806684	three_prime_UTR;GATAD2B;protein_coding;ENSG00000143614.10	140.306	-
chr1	153806688	153806697	three_prime_UTR;GATAD2B;protein_coding;ENSG00000143614.10	193.262	-
chr1	153806704	153806713	three_prime_UTR;GATAD2B;protein_coding;ENSG00000143614.10	3.95414	-
chr1	153806762	153806771	three_prime_UTR;GATAD2B;protein_coding;ENSG00000143614.10	14.1833	-
chr1	153806841	153806850	three_prime_UTR;GATAD2B;protein_coding;ENSG00000143614.10	39.3493	-
chr1	153806855	153806864	three_prime_UTR;GATAD2B;protein_coding;ENSG00000143614.10	20.2336	-
chr1	153806949	153806958	three_prime_UTR;GATAD2B;protein_coding;ENSG00000143614.10	10.3052	-
chr1	153807334	153807343	three_prime_UTR;GATAD2B;protein_coding;ENSG00000143614.10	2.47463	-
chr1	153807344	153807353	three_prime_UTR;GATAD2B;protein_coding;ENSG00000143614.10	111.909	-
chr1	153807369	153807378	three_prime_UTR;GATAD2B;protein_coding;ENSG00000143614.10	22.2053	-
chr1	153808292	153808301	three_prime_UTR;GATAD2B;protein_coding;ENSG00000143614.10	5.05192	-
chr1	153808312	153808321	three_prime_UTR;GATAD2B;protein_coding;ENSG00000143614.10	31.4455	-
chr1	153808323	153808332	three_prime_UTR;GATAD2B;protein_coding;ENSG00000143614.10	100.052	-
chr1	153809709	153809718	three_prime_UTR;GATAD2B;protein_coding;ENSG00000143614.10	20.3863	-
chr1	153809723	153809732	three_prime_UTR;GATAD2B;protein_coding;ENSG00000143614.10	14.2567	-
chr1	153809797	153809806	three_prime_UTR;GATAD2B;protein_coding;ENSG00000143614.10	87.3478	-
chr1	153809837	153809846	three_prime_UTR;GATAD2B;protein_coding;ENSG00000143614.10	1.05204	-
chr1	153809909	153809918	three_prime_UTR;GATAD2B;protein_coding;ENSG00000143614.10	9.58819	-
chr1	153809927	153809936	three_prime_UTR;GATAD2B;protein_coding;ENSG00000143614.10	61.2883	-
chr1	153929551	153929560	three_prime_UTR;DENND4B;protein_coding;ENSG00000198837.10	21.3374	-
chr1	153929601	153929610	three_prime_UTR;DENND4B;protein_coding;ENSG00000198837.10	11.8107	-
chr1	153929666	153929675	three_prime_UTR;DENND4B;protein_coding;ENSG00000198837.10	2.79048	-
chr1	153929801	153929810	three_prime_UTR;DENND4B;protein_coding;ENSG00000198837.10	31.3776	-
chr1	153929960	153929969	three_prime_UTR;DENND4B;protein_coding;ENSG00000198837.10	91.3572	-
chr1	153929975	153929984	three_prime_UTR;DENND4B;protein_coding;ENSG00000198837.10	2331.17	-
chr1	153929998	153930007	three_prime_UTR;DENND4B;protein_coding;ENSG00000198837.10	1711.28	-
chr1	153930024	153930033	three_prime_UTR;DENND4B;protein_coding;ENSG00000198837.10	581.376	-
chr1	153930231	153930240	three_prime_UTR;DENND4B;protein_coding;ENSG00000198837.10	7.00214	-
chr1	153950457	153950466	intron;CRTC2;protein_coding;ENSG00000160741.17	23.0606	-
chr1	153950531	153950540	intron;CRTC2;protein_coding;ENSG00000160741.17	11.7312	-
chr1	153950768	153950777	intron;CRTC2;protein_coding;ENSG00000160741.17	7.37646	-
chr1	153950822	153950831	intron;CRTC2;protein_coding;ENSG00000160741.17	55.3726	-
chr1	153990755	153990764	five_prime_UTR;RPS27;protein_coding;ENSG00000177954.14	1943.31	+
chr1	153990777	153990786	five_prime_UTR;RPS27;protein_coding;ENSG00000177954.14	70.6174	+
chr1	153990792	153990801	five_prime_UTR;RPS27;protein_coding;ENSG00000177954.14	281.276	+
chr1	153991129	153991138	CDS;RPS27;protein_coding;ENSG00000177954.14	1.52364	+
chr1	153991140	153991149	CDS;RPS27;protein_coding;ENSG00000177954.14	5.53694	+
chr1	153991208	153991217	CDS;RPS27;protein_coding;ENSG00000177954.14	159.981	+
chr1	153991566	153991575	CDS;RPS27;protein_coding;ENSG00000177954.14	188.288	+
chr1	153991586	153991595	three_prime_UTR;RPS27;protein_coding;ENSG00000177954.14	213.78	+
chr1	153991605	153991614	three_prime_UTR;RPS27;protein_coding;ENSG00000177954.14	174.182	+
chr1	153991615	153991624	three_prime_UTR;RPS27;protein_coding;ENSG00000177954.14	35.5759	+
chr1	153991625	153991634	three_prime_UTR;RPS27;protein_coding;ENSG00000177954.14	160.642	+
chr1	153991654	153991663	three_prime_UTR;RPS27;protein_coding;ENSG00000177954.14	1.29812	+
chr1	154156572	154156581	three_prime_UTR;TPM3;protein_coding;ENSG00000143549.21	9.96148	-
chr1	154156583	154156592	three_prime_UTR;TPM3;protein_coding;ENSG00000143549.21	15.291	-
chr1	154156603	154156612	three_prime_UTR;TPM3;protein_coding;ENSG00000143549.21	11.7675	-
chr1	154156661	154156670	three_prime_UTR;TPM3;protein_coding;ENSG00000143549.21	36.2202	-
chr1	154156740	154156749	three_prime_UTR;TPM3;protein_coding;ENSG00000143549.21	10.0661	-
chr1	154156753	154156762	three_prime_UTR;TPM3;protein_coding;ENSG00000143549.21	33.3476	-
chr1	154156777	154156786	three_prime_UTR;TPM3;protein_coding;ENSG00000143549.21	34.9805	-
chr1	154156820	154156829	three_prime_UTR;TPM3;protein_coding;ENSG00000143549.21	53.8772	-
chr1	154156870	154156879	three_prime_UTR;TPM3;protein_coding;ENSG00000143549.21	25.7545	-
chr1	154156887	154156896	three_prime_UTR;TPM3;protein_coding;ENSG00000143549.21	38.565	-
chr1	154156940	154156949	three_prime_UTR;TPM3;protein_coding;ENSG00000143549.21	139.263	-
chr1	154156989	154156998	three_prime_UTR;TPM3;protein_coding;ENSG00000143549.21	41.4825	-
chr1	154157131	154157140	three_prime_UTR;TPM3;protein_coding;ENSG00000143549.21	1.25576	-
chr1	154157211	154157220	three_prime_UTR;TPM3;protein_coding;ENSG00000143549.21	19.3503	-
chr1	154157273	154157282	three_prime_UTR;TPM3;protein_coding;ENSG00000143549.21	1.94398	-
chr1	154157325	154157334	three_prime_UTR;TPM3;protein_coding;ENSG00000143549.21	8.00669	-
chr1	154157345	154157354	three_prime_UTR;TPM3;protein_coding;ENSG00000143549.21	45.7392	-
chr1	154157378	154157387	three_prime_UTR;TPM3;protein_coding;ENSG00000143549.21	79.3723	-
chr1	154157489	154157498	three_prime_UTR;TPM3;protein_coding;ENSG00000143549.21	80.8367	-
chr1	154157512	154157521	three_prime_UTR;TPM3;protein_coding;ENSG00000143549.21	1.01939	-
chr1	154214523	154214532	three_prime_UTR;C1orf43;protein_coding;ENSG00000143612.21	9.32423	-
chr1	154214549	154214558	three_prime_UTR;C1orf43;protein_coding;ENSG00000143612.21	76.2704	-
chr1	154219841	154219850	CDS;C1orf43;protein_coding;ENSG00000143612.21	142.114	-
chr1	154219853	154219862	CDS;C1orf43;protein_coding;ENSG00000143612.21	26.8695	-
chr1	154219894	154219903	CDS;C1orf43;protein_coding;ENSG00000143612.21	77.0939	-
chr1	154220950	154220959	five_prime_UTR;UBAP2L;protein_coding;ENSG00000143569.19	290.436	+
chr1	154220976	154220985	five_prime_UTR;UBAP2L;protein_coding;ENSG00000143569.19	9.32553	+
chr1	154225115	154225124	five_prime_UTR;UBAP2L;protein_coding;ENSG00000143569.19	23.4597	+
chr1	154225179	154225188	CDS;UBAP2L;protein_coding;ENSG00000143569.19	1.91224	+
chr1	154270466	154270475	three_prime_UTR;UBAP2L;protein_coding;ENSG00000143569.19	49.9971	+
chr1	154270484	154270493	three_prime_UTR;UBAP2L;protein_coding;ENSG00000143569.19	102.1	+
chr1	154270551	154270560	three_prime_UTR;UBAP2L;protein_coding;ENSG00000143569.19	3.69166	+
chr1	154349630	154349639	three_prime_UTR;ATP8B2;protein_coding;ENSG00000143515.20	11.4993	+
chr1	154349652	154349661	three_prime_UTR;ATP8B2;protein_coding;ENSG00000143515.20	11.8374	+
chr1	154349662	154349671	three_prime_UTR;ATP8B2;protein_coding;ENSG00000143515.20	4.77588	+
chr1	154350082	154350091	three_prime_UTR;ATP8B2;protein_coding;ENSG00000143515.20	48.7842	+
chr1	154350405	154350414	three_prime_UTR;ATP8B2;protein_coding;ENSG00000143515.20	9.92711	+
chr1	154350455	154350464	three_prime_UTR;ATP8B2;protein_coding;ENSG00000143515.20	31.3444	+
chr1	154351157	154351166	three_prime_UTR;ATP8B2;protein_coding;ENSG00000143515.20	119.298	+
chr1	154351174	154351183	three_prime_UTR;ATP8B2;protein_coding;ENSG00000143515.20	47.9379	+
chr1	154351187	154351196	three_prime_UTR;ATP8B2;protein_coding;ENSG00000143515.20	2.28554	+
chr1	154351225	154351234	three_prime_UTR;ATP8B2;protein_coding;ENSG00000143515.20	55.4301	+
chr1	154550053	154550062	three_prime_UTR;UBE2Q1;protein_coding;ENSG00000160714.10	3.77832	-
chr1	154582132	154582141	three_prime_UTR;ADAR;protein_coding;ENSG00000160710.18	20.053	-
chr1	154582149	154582158	three_prime_UTR;ADAR;protein_coding;ENSG00000160710.18	46.1706	-
chr1	154582164	154582173	three_prime_UTR;ADAR;protein_coding;ENSG00000160710.18	194.484	-
chr1	154582223	154582232	three_prime_UTR;ADAR;protein_coding;ENSG00000160710.18	44.2822	-
chr1	154582410	154582419	three_prime_UTR;ADAR;protein_coding;ENSG00000160710.18	33.0316	-
chr1	154583535	154583544	three_prime_UTR;ADAR;protein_coding;ENSG00000160710.18	4.6435	-
chr1	154583560	154583569	three_prime_UTR;ADAR;protein_coding;ENSG00000160710.18	26.1221	-
chr1	154583637	154583646	three_prime_UTR;ADAR;protein_coding;ENSG00000160710.18	9.71379	-
chr1	154583650	154583659	three_prime_UTR;ADAR;protein_coding;ENSG00000160710.18	26.2811	-
chr1	154583690	154583699	three_prime_UTR;ADAR;protein_coding;ENSG00000160710.18	15.1708	-
chr1	154584060	154584069	three_prime_UTR;ADAR;protein_coding;ENSG00000160710.18	13.3009	-
chr1	154584082	154584091	three_prime_UTR;ADAR;protein_coding;ENSG00000160710.18	49.9408	-
chr1	154584107	154584116	three_prime_UTR;ADAR;protein_coding;ENSG00000160710.18	142.078	-
chr1	154584119	154584128	three_prime_UTR;ADAR;protein_coding;ENSG00000160710.18	4.10533	-
chr1	154584132	154584141	three_prime_UTR;ADAR;protein_coding;ENSG00000160710.18	33.3096	-
chr1	154584157	154584166	three_prime_UTR;ADAR;protein_coding;ENSG00000160710.18	31.4996	-
chr1	154584186	154584195	three_prime_UTR;ADAR;protein_coding;ENSG00000160710.18	10.5922	-
chr1	154584253	154584262	three_prime_UTR;ADAR;protein_coding;ENSG00000160710.18	54.1565	-
chr1	154584304	154584313	three_prime_UTR;ADAR;protein_coding;ENSG00000160710.18	1.30937	-
chr1	154584331	154584340	three_prime_UTR;ADAR;protein_coding;ENSG00000160710.18	36.2517	-
chr1	154584378	154584387	three_prime_UTR;ADAR;protein_coding;ENSG00000160710.18	5.94662	-
chr1	154584478	154584487	three_prime_UTR;ADAR;protein_coding;ENSG00000160710.18	70.8183	-
chr1	154584493	154584502	three_prime_UTR;ADAR;protein_coding;ENSG00000160710.18	81.2303	-
chr1	154584595	154584604	three_prime_UTR;ADAR;protein_coding;ENSG00000160710.18	4.30601	-
chr1	154584644	154584653	three_prime_UTR;ADAR;protein_coding;ENSG00000160710.18	29.6672	-
chr1	154584698	154584707	three_prime_UTR;ADAR;protein_coding;ENSG00000160710.18	47.0797	-
chr1	154584938	154584947	three_prime_UTR;ADAR;protein_coding;ENSG00000160710.18	29.8858	-
chr1	154584949	154584958	three_prime_UTR;ADAR;protein_coding;ENSG00000160710.18	67.5471	-
chr1	154584964	154584973	three_prime_UTR;ADAR;protein_coding;ENSG00000160710.18	217.458	-
chr1	154584987	154584996	three_prime_UTR;ADAR;protein_coding;ENSG00000160710.18	214.074	-
chr1	154585002	154585011	three_prime_UTR;ADAR;protein_coding;ENSG00000160710.18	81.6492	-
chr1	154585027	154585036	three_prime_UTR;ADAR;protein_coding;ENSG00000160710.18	57.8919	-
chr1	154957133	154957142	three_prime_UTR;PYGO2;protein_coding;ENSG00000163348.4	8.58532	-
chr1	154957148	154957157	three_prime_UTR;PYGO2;protein_coding;ENSG00000163348.4	5.52874	-
chr1	154957171	154957180	three_prime_UTR;PYGO2;protein_coding;ENSG00000163348.4	11.2744	-
chr1	154958300	154958309	three_prime_UTR;PYGO2;protein_coding;ENSG00000163348.4	51.1531	-
chr1	154958323	154958332	three_prime_UTR;PYGO2;protein_coding;ENSG00000163348.4	164.996	-
chr1	155016830	155016839	three_prime_UTR;ZBTB7B;protein_coding;ENSG00000160685.14	30.7758	+
chr1	155016842	155016851	three_prime_UTR;ZBTB7B;protein_coding;ENSG00000160685.14	58.9934	+
chr1	155016853	155016862	three_prime_UTR;ZBTB7B;protein_coding;ENSG00000160685.14	1.11264	+
chr1	155016867	155016876	three_prime_UTR;ZBTB7B;protein_coding;ENSG00000160685.14	107.295	+
chr1	155016877	155016886	three_prime_UTR;ZBTB7B;protein_coding;ENSG00000160685.14	17.7951	+
chr1	155016893	155016902	three_prime_UTR;ZBTB7B;protein_coding;ENSG00000160685.14	25.1558	+
chr1	155016925	155016934	three_prime_UTR;ZBTB7B;protein_coding;ENSG00000160685.14	6.3447	+
chr1	155016984	155016993	three_prime_UTR;ZBTB7B;protein_coding;ENSG00000160685.14	17.9748	+
chr1	155087261	155087270	three_prime_UTR;EFNA3;protein_coding;ENSG00000143590.14	9.96378	+
chr1	155087282	155087291	three_prime_UTR;EFNA3;protein_coding;ENSG00000143590.14	6.19856	+
chr1	155087304	155087313	three_prime_UTR;EFNA3;protein_coding;ENSG00000143590.14	184.323	+
chr1	155087315	155087324	three_prime_UTR;EFNA3;protein_coding;ENSG00000143590.14	26.0277	+
chr1	155087329	155087338	three_prime_UTR;EFNA3;protein_coding;ENSG00000143590.14	92.3564	+
chr1	155087359	155087368	three_prime_UTR;EFNA3;protein_coding;ENSG00000143590.14	3.73368	+
chr1	155087406	155087415	three_prime_UTR;EFNA3;protein_coding;ENSG00000143590.14	4.53802	+
chr1	155262965	155262974	three_prime_UTR;CLK2;protein_coding;ENSG00000176444.19	7.03452	-
chr1	155262997	155263006	three_prime_UTR;CLK2;protein_coding;ENSG00000176444.19	3.15864	-
chr1	155263040	155263049	three_prime_UTR;CLK2;protein_coding;ENSG00000176444.19	12.7333	-
chr1	155263114	155263123	three_prime_UTR;CLK2;protein_coding;ENSG00000176444.19	11.9643	-
chr1	155263139	155263148	three_prime_UTR;CLK2;protein_coding;ENSG00000176444.19	22.4383	-
chr1	155335322	155335331	three_prime_UTR;ASH1L;protein_coding;ENSG00000116539.14	7.18146	-
chr1	155335343	155335352	three_prime_UTR;ASH1L;protein_coding;ENSG00000116539.14	32.9489	-
chr1	155335353	155335362	three_prime_UTR;ASH1L;protein_coding;ENSG00000116539.14	11.2032	-
chr1	155335382	155335391	three_prime_UTR;ASH1L;protein_coding;ENSG00000116539.14	58.1079	-
chr1	155335398	155335407	three_prime_UTR;ASH1L;protein_coding;ENSG00000116539.14	34.1157	-
chr1	155335410	155335419	three_prime_UTR;ASH1L;protein_coding;ENSG00000116539.14	3.88494	-
chr1	155815961	155815970	exon;GON4L;protein_coding;ENSG00000116580.20	1.58241	-
chr1	156201543	156201552	intron;SLC25A44;protein_coding;ENSG00000160785.14	16.4731	+
chr1	156201560	156201569	intron;SLC25A44;protein_coding;ENSG00000160785.14	3.64587	+
chr1	156201577	156201586	intron;SLC25A44;protein_coding;ENSG00000160785.14	2.7339	+
chr1	156201653	156201662	intron;SLC25A44;protein_coding;ENSG00000160785.14	17.4665	+
chr1	156201694	156201703	intron;SLC25A44;protein_coding;ENSG00000160785.14	31.0899	+
chr1	157121319	157121328	three_prime_UTR;ETV3;protein_coding;ENSG00000117036.12	257.35	-
chr1	157121380	157121389	three_prime_UTR;ETV3;protein_coding;ENSG00000117036.12	24.8994	-
chr1	157124658	157124667	three_prime_UTR;ETV3;protein_coding;ENSG00000117036.12	17.0337	-
chr1	157124685	157124694	three_prime_UTR;ETV3;protein_coding;ENSG00000117036.12	53.0142	-
chr1	157124700	157124709	three_prime_UTR;ETV3;protein_coding;ENSG00000117036.12	25.7069	-
chr1	157124711	157124720	three_prime_UTR;ETV3;protein_coding;ENSG00000117036.12	26.6342	-
chr1	159009156	159009165	five_prime_UTR;IFI16;protein_coding;ENSG00000163565.20	138.492	+
chr1	159009167	159009176	five_prime_UTR;IFI16;protein_coding;ENSG00000163565.20	12.0235	+
chr1	159009191	159009200	five_prime_UTR;IFI16;protein_coding;ENSG00000163565.20	9.29467	+
chr1	159009898	159009907	five_prime_UTR;IFI16;protein_coding;ENSG00000163565.20	1.68904	+
chr1	159009919	159009928	five_prime_UTR;IFI16;protein_coding;ENSG00000163565.20	79.6123	+
chr1	159010009	159010018	five_prime_UTR;IFI16;protein_coding;ENSG00000163565.20	903.262	+
chr1	159010019	159010028	five_prime_UTR;IFI16;protein_coding;ENSG00000163565.20	224.828	+
chr1	159010036	159010045	five_prime_UTR;IFI16;protein_coding;ENSG00000163565.20	207.237	+
chr1	159010049	159010058	five_prime_UTR;IFI16;protein_coding;ENSG00000163565.20	102.408	+
chr1	159010066	159010075	five_prime_UTR;IFI16;protein_coding;ENSG00000163565.20	63.8324	+
chr1	159010109	159010118	five_prime_UTR;IFI16;protein_coding;ENSG00000163565.20	15.4741	+
chr1	159014687	159014696	CDS;IFI16;protein_coding;ENSG00000163565.20	34.7759	+
chr1	159054918	159054927	three_prime_UTR;IFI16;protein_coding;ENSG00000163565.20	10.4529	+
chr1	159055015	159055024	three_prime_UTR;IFI16;protein_coding;ENSG00000163565.20	206.417	+
chr1	159055047	159055056	three_prime_UTR;IFI16;protein_coding;ENSG00000163565.20	168.279	+
chr1	159055057	159055066	three_prime_UTR;IFI16;protein_coding;ENSG00000163565.20	140.014	+
chr1	159055071	159055080	three_prime_UTR;IFI16;protein_coding;ENSG00000163565.20	97.6901	+
chr1	159055089	159055098	three_prime_UTR;IFI16;protein_coding;ENSG00000163565.20	89.0495	+
chr1	159055102	159055111	three_prime_UTR;IFI16;protein_coding;ENSG00000163565.20	30.4991	+
chr1	160358776	160358785	three_prime_UTR;NCSTN;protein_coding;ENSG00000162736.17	14.6536	+
chr1	160358847	160358856	three_prime_UTR;NCSTN;protein_coding;ENSG00000162736.17	183.995	+
chr1	160358874	160358883	three_prime_UTR;NCSTN;protein_coding;ENSG00000162736.17	103.475	+
chr1	160358884	160358893	three_prime_UTR;NCSTN;protein_coding;ENSG00000162736.17	43.4655	+
chr1	160610288	160610297	three_prime_UTR;SLAMF1;protein_coding;ENSG00000117090.16	19.3283	-
chr1	160610508	160610517	three_prime_UTR;SLAMF1;protein_coding;ENSG00000117090.16	18.4789	-
chr1	160678783	160678792	three_prime_UTR;CD48;protein_coding;ENSG00000117091.10	5.94163	-
chr1	160678803	160678812	three_prime_UTR;CD48;protein_coding;ENSG00000117091.10	117.199	-
chr1	160678814	160678823	three_prime_UTR;CD48;protein_coding;ENSG00000117091.10	113.873	-
chr1	160678825	160678834	three_prime_UTR;CD48;protein_coding;ENSG00000117091.10	43.643	-
chr1	160678859	160678868	three_prime_UTR;CD48;protein_coding;ENSG00000117091.10	246.365	-
chr1	160678886	160678895	three_prime_UTR;CD48;protein_coding;ENSG00000117091.10	221.695	-
chr1	160679035	160679044	three_prime_UTR;CD48;protein_coding;ENSG00000117091.10	8.89803	-
chr1	160679550	160679559	intron;CD48;protein_coding;ENSG00000117091.10	6.84584	-
chr1	160679629	160679638	intron;CD48;protein_coding;ENSG00000117091.10	3.40444	-
chr1	160679653	160679662	intron;CD48;protein_coding;ENSG00000117091.10	74.5533	-
chr1	160680003	160680012	intron;CD48;protein_coding;ENSG00000117091.10	15.9504	-
chr1	160680058	160680067	intron;CD48;protein_coding;ENSG00000117091.10	43.9628	-
chr1	160681281	160681290	CDS;CD48;protein_coding;ENSG00000117091.10	10.9405	-
chr1	160681296	160681305	CDS;CD48;protein_coding;ENSG00000117091.10	27.8924	-
chr1	160682456	160682465	intron;CD48;protein_coding;ENSG00000117091.10	8.26009	-
chr1	160685025	160685034	CDS;CD48;protein_coding;ENSG00000117091.10	126.882	-
chr1	160685108	160685117	CDS;CD48;protein_coding;ENSG00000117091.10	2.81869	-
chr1	160685131	160685140	CDS;CD48;protein_coding;ENSG00000117091.10	3.86754	-
chr1	160685175	160685184	CDS;CD48;protein_coding;ENSG00000117091.10	77.1513	-
chr1	160711718	160711727	CDS;CD48;protein_coding;ENSG00000117091.10	26.2115	-
chr1	160711770	160711779	five_prime_UTR;CD48;protein_coding;ENSG00000117091.10	37.7412	-
chr1	160711790	160711799	five_prime_UTR;CD48;protein_coding;ENSG00000117091.10	53.2245	-
chr1	161047057	161047066	three_prime_UTR;ARHGAP30;protein_coding;ENSG00000186517.14	22.4417	-
chr1	161047069	161047078	three_prime_UTR;ARHGAP30;protein_coding;ENSG00000186517.14	9.81654	-
chr1	161047095	161047104	three_prime_UTR;ARHGAP30;protein_coding;ENSG00000186517.14	134.754	-
chr1	161047107	161047116	three_prime_UTR;ARHGAP30;protein_coding;ENSG00000186517.14	94.067	-
chr1	161064762	161064771	intron;ARHGAP30;protein_coding;ENSG00000186517.14	9.61962	-
chr1	161064871	161064880	intron;ARHGAP30;protein_coding;ENSG00000186517.14	15.432	-
chr1	161064952	161064961	intron;ARHGAP30;protein_coding;ENSG00000186517.14	1.66195	-
chr1	161067677	161067686	intron;ARHGAP30;protein_coding;ENSG00000186517.14	12.488	-
chr1	161165628	161165637	three_prime_UTR;USP21;protein_coding;ENSG00000143258.17	2.63925	+
chr1	161165653	161165662	three_prime_UTR;USP21;protein_coding;ENSG00000143258.17	4.12626	+
chr1	161213401	161213410	three_prime_UTR;NDUFS2;protein_coding;ENSG00000158864.13	77.6562	+
chr1	161214296	161214305	three_prime_UTR;NDUFS2;protein_coding;ENSG00000158864.13	189.926	+
chr1	161328389	161328398	intron;SDHC;protein_coding;ENSG00000143252.16	22.0175	+
chr1	161328401	161328410	three_prime_UTR;SDHC;protein_coding;ENSG00000143252.16	5.49603	+
chr1	161328413	161328422	three_prime_UTR;SDHC;protein_coding;ENSG00000143252.16	3.46806	+
chr1	161328447	161328456	three_prime_UTR;SDHC;protein_coding;ENSG00000143252.16	69.3092	+
chr1	161328476	161328485	three_prime_UTR;SDHC;protein_coding;ENSG00000143252.16	39.0725	+
chr1	161362587	161362596	three_prime_UTR;SDHC;protein_coding;ENSG00000143252.16	15.4768	+
chr1	161771242	161771251	intron;ATF6;protein_coding;ENSG00000118217.7	3.80323	+
chr1	162523002	162523011	three_prime_UTR;UHMK1;protein_coding;ENSG00000152332.16	153.381	+
chr1	162523013	162523022	three_prime_UTR;UHMK1;protein_coding;ENSG00000152332.16	8.22075	+
chr1	162523065	162523074	three_prime_UTR;UHMK1;protein_coding;ENSG00000152332.16	18.9701	+
chr1	162523209	162523218	three_prime_UTR;UHMK1;protein_coding;ENSG00000152332.16	94.1083	+
chr1	162523223	162523232	three_prime_UTR;UHMK1;protein_coding;ENSG00000152332.16	192.818	+
chr1	162523242	162523251	three_prime_UTR;UHMK1;protein_coding;ENSG00000152332.16	143.995	+
chr1	162523252	162523261	three_prime_UTR;UHMK1;protein_coding;ENSG00000152332.16	17.6775	+
chr1	162523264	162523273	three_prime_UTR;UHMK1;protein_coding;ENSG00000152332.16	110.69	+
chr1	162523294	162523303	three_prime_UTR;UHMK1;protein_coding;ENSG00000152332.16	17.5579	+
chr1	162523341	162523350	three_prime_UTR;UHMK1;protein_coding;ENSG00000152332.16	3.99665	+
chr1	162523546	162523555	three_prime_UTR;UHMK1;protein_coding;ENSG00000152332.16	35.5945	+
chr1	162524094	162524103	three_prime_UTR;UHMK1;protein_coding;ENSG00000152332.16	124.761	+
chr1	162524129	162524138	three_prime_UTR;UHMK1;protein_coding;ENSG00000152332.16	26.0656	+
chr1	162524156	162524165	three_prime_UTR;UHMK1;protein_coding;ENSG00000152332.16	42.081	+
chr1	162524204	162524213	three_prime_UTR;UHMK1;protein_coding;ENSG00000152332.16	10.4072	+
chr1	162524222	162524231	three_prime_UTR;UHMK1;protein_coding;ENSG00000152332.16	1.76028	+
chr1	162524987	162524996	three_prime_UTR;UHMK1;protein_coding;ENSG00000152332.16	1.13273	+
chr1	162524998	162525007	three_prime_UTR;UHMK1;protein_coding;ENSG00000152332.16	14.382	+
chr1	162525015	162525024	three_prime_UTR;UHMK1;protein_coding;ENSG00000152332.16	19.1491	+
chr1	162525030	162525039	three_prime_UTR;UHMK1;protein_coding;ENSG00000152332.16	56.1511	+
chr1	162525065	162525074	three_prime_UTR;UHMK1;protein_coding;ENSG00000152332.16	17.5687	+
chr1	162525902	162525911	three_prime_UTR;UHMK1;protein_coding;ENSG00000152332.16	4.53607	+
chr1	162529297	162529306	three_prime_UTR;UHMK1;protein_coding;ENSG00000152332.16	26.4131	+
chr1	162529344	162529353	three_prime_UTR;UHMK1;protein_coding;ENSG00000152332.16	4.10212	+
chr1	162529364	162529373	three_prime_UTR;UHMK1;protein_coding;ENSG00000152332.16	47.05	+
chr1	162529374	162529383	three_prime_UTR;UHMK1;protein_coding;ENSG00000152332.16	6.46664	+
chr1	162529501	162529510	three_prime_UTR;UHMK1;protein_coding;ENSG00000152332.16	25.4344	+
chr1	166853932	166853941	three_prime_UTR;POGK;protein_coding;ENSG00000143157.12	19.5159	+
chr1	166853953	166853962	three_prime_UTR;POGK;protein_coding;ENSG00000143157.12	7.98898	+
chr1	166853990	166853999	three_prime_UTR;POGK;protein_coding;ENSG00000143157.12	3.41591	+
chr1	166856550	166856559	three_prime_UTR;TADA1;protein_coding;ENSG00000152382.6	9.52698	-
chr1	166856566	166856575	three_prime_UTR;TADA1;protein_coding;ENSG00000152382.6	3.60493	-
chr1	166856577	166856586	three_prime_UTR;TADA1;protein_coding;ENSG00000152382.6	1.33157	-
chr1	166856593	166856602	three_prime_UTR;TADA1;protein_coding;ENSG00000152382.6	14.354	-
chr1	166856608	166856617	three_prime_UTR;TADA1;protein_coding;ENSG00000152382.6	108.066	-
chr1	166856630	166856639	three_prime_UTR;TADA1;protein_coding;ENSG00000152382.6	22.6015	-
chr1	166857449	166857458	three_prime_UTR;TADA1;protein_coding;ENSG00000152382.6	117.617	-
chr1	166857460	166857469	three_prime_UTR;TADA1;protein_coding;ENSG00000152382.6	179.072	-
chr1	166857470	166857479	three_prime_UTR;TADA1;protein_coding;ENSG00000152382.6	7.32722	-
chr1	166857482	166857491	three_prime_UTR;TADA1;protein_coding;ENSG00000152382.6	317.427	-
chr1	166857501	166857510	three_prime_UTR;TADA1;protein_coding;ENSG00000152382.6	549.614	-
chr1	166857511	166857520	three_prime_UTR;TADA1;protein_coding;ENSG00000152382.6	82.7516	-
chr1	167416258	167416267	three_prime_UTR;POU2F1;protein_coding;ENSG00000143190.23	157.671	+
chr1	167416284	167416293	three_prime_UTR;POU2F1;protein_coding;ENSG00000143190.23	13.1898	+
chr1	167426859	167426868	three_prime_UTR;POU2F1;protein_coding;ENSG00000143190.23	45.3275	+
chr1	167426880	167426889	three_prime_UTR;POU2F1;protein_coding;ENSG00000143190.23	36.7252	+
chr1	167662416	167662425	intron;RCSD1;protein_coding;ENSG00000198771.11	1.70605	+
chr1	167662470	167662479	intron;RCSD1;protein_coding;ENSG00000198771.11	4.0786	+
chr1	167705659	167705668	three_prime_UTR;RCSD1;protein_coding;ENSG00000198771.11	11.8822	+
chr1	167706149	167706158	three_prime_UTR;RCSD1;protein_coding;ENSG00000198771.11	69.2636	+
chr1	167706165	167706174	three_prime_UTR;RCSD1;protein_coding;ENSG00000198771.11	3.49019	+
chr1	167707673	167707682	three_prime_UTR;RCSD1;protein_coding;ENSG00000198771.11	77.2657	+
chr1	168006785	168006794	intron;DCAF6;protein_coding;ENSG00000143164.16	9.13523	+
chr1	168006799	168006808	intron;DCAF6;protein_coding;ENSG00000143164.16	6.33706	+
chr1	168006817	168006826	intron;DCAF6;protein_coding;ENSG00000143164.16	6.02789	+
chr1	168007123	168007132	intron;DCAF6;protein_coding;ENSG00000143164.16	3.26191	+
chr1	168007141	168007150	intron;DCAF6;protein_coding;ENSG00000143164.16	6.71872	+
chr1	168007153	168007162	intron;DCAF6;protein_coding;ENSG00000143164.16	4.64288	+
chr1	168007292	168007301	intron;DCAF6;protein_coding;ENSG00000143164.16	2.40386	+
chr1	168007302	168007311	intron;DCAF6;protein_coding;ENSG00000143164.16	2.2213	+
chr1	168007336	168007345	intron;DCAF6;protein_coding;ENSG00000143164.16	3.54292	+
chr1	168007377	168007386	intron;DCAF6;protein_coding;ENSG00000143164.16	1.09566	+
chr1	168007439	168007448	intron;DCAF6;protein_coding;ENSG00000143164.16	17.7842	+
chr1	168007463	168007472	intron;DCAF6;protein_coding;ENSG00000143164.16	11.4291	+
chr1	168007484	168007493	intron;DCAF6;protein_coding;ENSG00000143164.16	8.90473	+
chr1	168007496	168007505	intron;DCAF6;protein_coding;ENSG00000143164.16	4.45222	+
chr1	168007578	168007587	intron;DCAF6;protein_coding;ENSG00000143164.16	11.8334	+
chr1	168007633	168007642	intron;DCAF6;protein_coding;ENSG00000143164.16	1.40641	+
chr1	168007739	168007748	intron;DCAF6;protein_coding;ENSG00000143164.16	5.66548	+
chr1	168007803	168007812	intron;DCAF6;protein_coding;ENSG00000143164.16	34.2701	+
chr1	168008290	168008299	intron;DCAF6;protein_coding;ENSG00000143164.16	2.36174	+
chr1	168008331	168008340	intron;DCAF6;protein_coding;ENSG00000143164.16	1.2968	+
chr1	168008369	168008378	intron;DCAF6;protein_coding;ENSG00000143164.16	14.0534	+
chr1	168008399	168008408	intron;DCAF6;protein_coding;ENSG00000143164.16	46.7069	+
chr1	168008414	168008423	intron;DCAF6;protein_coding;ENSG00000143164.16	2.55857	+
chr1	168008450	168008459	intron;DCAF6;protein_coding;ENSG00000143164.16	5.88495	+
chr1	168008469	168008478	intron;DCAF6;protein_coding;ENSG00000143164.16	49.5626	+
chr1	168008485	168008494	intron;DCAF6;protein_coding;ENSG00000143164.16	4.37254	+
[truncated: 31,492 more rows]

## Sheet: 02_mouse_peaks_bed
chr1	6274997	6275006	three_prime_UTR;Rb1cc1;protein_coding;ENSMUSG00000025907.14	9.34445	+
chr1	7170406	7170415	three_prime_UTR;Pcmtd1;protein_coding;ENSMUSG00000051285.17	5.09406	+
chr1	7170431	7170440	three_prime_UTR;Pcmtd1;protein_coding;ENSMUSG00000051285.17	26.0541	+
chr1	7170481	7170490	three_prime_UTR;Pcmtd1;protein_coding;ENSMUSG00000051285.17	30.5416	+
chr1	9899604	9899613	three_prime_UTR;Sgk3;protein_coding;ENSMUSG00000025915.14	4.99828	+
chr1	13337373	13337382	intron;Ncoa2;protein_coding;ENSMUSG00000005886.14	3.97292	-
chr1	16102711	16102720	CDS;Rpl7;protein_coding;ENSMUSG00000043716.13	35.1257	-
chr1	16570667	16570676	three_prime_UTR;Ube2w;protein_coding;ENSMUSG00000025939.19	17.6321	-
chr1	16570701	16570710	three_prime_UTR;Ube2w;protein_coding;ENSMUSG00000025939.19	13.3963	-
chr1	30803756	30803765	three_prime_UTR;Phf3;protein_coding;ENSMUSG00000048874.15	20.4446	-
chr1	30803776	30803785	three_prime_UTR;Phf3;protein_coding;ENSMUSG00000048874.15	34.0711	-
chr1	33801601	33801610	three_prime_UTR;Zfp451;protein_coding;ENSMUSG00000042197.13	76.587	-
chr1	33801628	33801637	three_prime_UTR;Zfp451;protein_coding;ENSMUSG00000042197.13	297.269	-
chr1	34472831	34472840	CDS;Ptpn18;protein_coding;ENSMUSG00000026126.15	4.84818	+
chr1	34472885	34472894	CDS;Ptpn18;protein_coding;ENSMUSG00000026126.15	12.6723	+
chr1	34472911	34472920	CDS;Ptpn18;protein_coding;ENSMUSG00000026126.15	15.3674	+
chr1	34472926	34472935	CDS;Ptpn18;protein_coding;ENSMUSG00000026126.15	12.8465	+
chr1	34472937	34472946	CDS;Ptpn18;protein_coding;ENSMUSG00000026126.15	13.5488	+
chr1	34473359	34473368	CDS;Ptpn18;protein_coding;ENSMUSG00000026126.15	20.5169	+
chr1	34473589	34473598	CDS;Ptpn18;protein_coding;ENSMUSG00000026126.15	3.09046	+
chr1	34473631	34473640	CDS;Ptpn18;protein_coding;ENSMUSG00000026126.15	51.2489	+
chr1	34473650	34473659	three_prime_UTR;Ptpn18;protein_coding;ENSMUSG00000026126.15	225.884	+
chr1	34473677	34473686	three_prime_UTR;Ptpn18;protein_coding;ENSMUSG00000026126.15	463.481	+
chr1	34473707	34473716	three_prime_UTR;Ptpn18;protein_coding;ENSMUSG00000026126.15	480.322	+
chr1	34473725	34473734	three_prime_UTR;Ptpn18;protein_coding;ENSMUSG00000026126.15	760.045	+
chr1	34816602	34816611	three_prime_UTR;Fam168b;protein_coding;ENSMUSG00000037503.12	45.8169	-
chr1	36144077	36144086	three_prime_UTR;Uggt1;protein_coding;ENSMUSG00000037470.14	15.5548	-
chr1	36144095	36144104	three_prime_UTR;Uggt1;protein_coding;ENSMUSG00000037470.14	56.8038	-
chr1	36144112	36144121	three_prime_UTR;Uggt1;protein_coding;ENSMUSG00000037470.14	20.9053	-
chr1	36144146	36144155	three_prime_UTR;Uggt1;protein_coding;ENSMUSG00000037470.14	27.9729	-
chr1	36156278	36156287	three_prime_UTR;Uggt1;protein_coding;ENSMUSG00000037470.14	15.6869	-
chr1	36163231	36163240	three_prime_UTR;Uggt1;protein_coding;ENSMUSG00000037470.14	15.9286	-
chr1	36266348	36266357	three_prime_UTR;Neurl3;protein_coding;ENSMUSG00000047180.8	3.41527	-
chr1	36525186	36525195	three_prime_UTR;Cnnm3;protein_coding;ENSMUSG00000001138.13	47.6739	+
chr1	36525253	36525262	three_prime_UTR;Cnnm3;protein_coding;ENSMUSG00000001138.13	6.54373	+
chr1	36525265	36525274	three_prime_UTR;Cnnm3;protein_coding;ENSMUSG00000001138.13	87.9051	+
chr1	36525318	36525327	three_prime_UTR;Cnnm3;protein_coding;ENSMUSG00000001138.13	188.528	+
chr1	36525329	36525338	three_prime_UTR;Cnnm3;protein_coding;ENSMUSG00000001138.13	122.351	+
chr1	36525346	36525355	three_prime_UTR;Cnnm3;protein_coding;ENSMUSG00000001138.13	108.578	+
chr1	36525602	36525611	three_prime_UTR;Cnnm3;protein_coding;ENSMUSG00000001138.13	12.3021	+
chr1	36525636	36525645	three_prime_UTR;Cnnm3;protein_coding;ENSMUSG00000001138.13	2.48097	+
chr1	36525745	36525754	three_prime_UTR;Cnnm3;protein_coding;ENSMUSG00000001138.13	18.883	+
chr1	36525763	36525772	three_prime_UTR;Cnnm3;protein_coding;ENSMUSG00000001138.13	36.5536	+
chr1	36525787	36525796	three_prime_UTR;Cnnm3;protein_coding;ENSMUSG00000001138.13	13.0614	+
chr1	36525877	36525886	three_prime_UTR;Cnnm3;protein_coding;ENSMUSG00000001138.13	15.0576	+
chr1	36525909	36525918	three_prime_UTR;Cnnm3;protein_coding;ENSMUSG00000001138.13	22.7208	+
chr1	36525919	36525928	three_prime_UTR;Cnnm3;protein_coding;ENSMUSG00000001138.13	23.0146	+
chr1	36526146	36526155	three_prime_UTR;Cnnm3;protein_coding;ENSMUSG00000001138.13	28.1547	+
chr1	36526162	36526171	three_prime_UTR;Cnnm3;protein_coding;ENSMUSG00000001138.13	13.2713	+
chr1	36526198	36526207	three_prime_UTR;Cnnm3;protein_coding;ENSMUSG00000001138.13	22.0305	+
chr1	36526212	36526221	three_prime_UTR;Cnnm3;protein_coding;ENSMUSG00000001138.13	6.42153	+
chr1	36526241	36526250	three_prime_UTR;Cnnm3;protein_coding;ENSMUSG00000001138.13	22.5847	+
chr1	36526259	36526268	three_prime_UTR;Cnnm3;protein_coding;ENSMUSG00000001138.13	10.047	+
chr1	36526658	36526667	three_prime_UTR;Cnnm3;protein_coding;ENSMUSG00000001138.13	7.56532	+
chr1	36526988	36526997	three_prime_UTR;Cnnm3;protein_coding;ENSMUSG00000001138.13	31.3078	+
chr1	36527018	36527027	three_prime_UTR;Cnnm3;protein_coding;ENSMUSG00000001138.13	9.04601	+
chr1	36781169	36781178	CDS;Zap70;protein_coding;ENSMUSG00000026117.10	1.41496	+
chr1	36781233	36781242	CDS;Zap70;protein_coding;ENSMUSG00000026117.10	8.74363	+
chr1	36782494	36782503	CDS;Zap70;protein_coding;ENSMUSG00000026117.10	5.98308	+
chr1	36782508	36782517	CDS;Zap70;protein_coding;ENSMUSG00000026117.10	13.9545	+
chr1	36782622	36782631	three_prime_UTR;Zap70;protein_coding;ENSMUSG00000026117.10	539.713	+
chr1	36782633	36782642	three_prime_UTR;Zap70;protein_coding;ENSMUSG00000026117.10	383.4	+
chr1	36782669	36782678	three_prime_UTR;Zap70;protein_coding;ENSMUSG00000026117.10	75.6026	+
chr1	36782745	36782754	three_prime_UTR;Zap70;protein_coding;ENSMUSG00000026117.10	45.585	+
chr1	36815918	36815927	CDS;Tmem131;protein_coding;ENSMUSG00000026116.11	85.1119	-
chr1	36819147	36819156	three_prime_UTR;Tmem131;protein_coding;ENSMUSG00000026116.11	9.19487	-
chr1	36819203	36819212	three_prime_UTR;Tmem131;protein_coding;ENSMUSG00000026116.11	23.535	-
chr1	36823080	36823089	three_prime_UTR;Tmem131;protein_coding;ENSMUSG00000026116.11	30.6929	-
chr1	36823103	36823112	three_prime_UTR;Tmem131;protein_coding;ENSMUSG00000026116.11	17.5063	-
chr1	37417911	37417920	three_prime_UTR;Coa5;protein_coding;ENSMUSG00000026112.7	1.46759	-
chr1	37443891	37443900	three_prime_UTR;Mgat4a;protein_coding;ENSMUSG00000026110.15	23.0005	-
chr1	37443910	37443919	three_prime_UTR;Mgat4a;protein_coding;ENSMUSG00000026110.15	1.11924	-
chr1	37443923	37443932	three_prime_UTR;Mgat4a;protein_coding;ENSMUSG00000026110.15	9.03042	-
chr1	37443941	37443950	three_prime_UTR;Mgat4a;protein_coding;ENSMUSG00000026110.15	40.426	-
chr1	37444397	37444406	three_prime_UTR;Mgat4a;protein_coding;ENSMUSG00000026110.15	18.0769	-
chr1	37444424	37444433	three_prime_UTR;Mgat4a;protein_coding;ENSMUSG00000026110.15	27.7686	-
chr1	37444443	37444452	three_prime_UTR;Mgat4a;protein_coding;ENSMUSG00000026110.15	14.1586	-
chr1	38045770	38045779	CDS;Eif5b;protein_coding;ENSMUSG00000026083.12	39.9879	+
chr1	38051910	38051919	three_prime_UTR;Eif5b;protein_coding;ENSMUSG00000026083.12	24.5886	+
chr1	38996319	38996328	three_prime_UTR;Pdcl3;protein_coding;ENSMUSG00000026078.10	41.8554	+
chr1	38996458	38996467	three_prime_UTR;Pdcl3;protein_coding;ENSMUSG00000026078.10	12.426	+
chr1	38996482	38996491	three_prime_UTR;Pdcl3;protein_coding;ENSMUSG00000026078.10	2.6815	+
chr1	40480560	40480569	intron;Il18r1;protein_coding;ENSMUSG00000026070.15	0.779159	+
chr1	40481893	40481902	intron;Il18r1;protein_coding;ENSMUSG00000026070.15	6.12889	+
chr1	40482123	40482132	intron;Il18r1;protein_coding;ENSMUSG00000026070.15	18.3349	+
chr1	40482204	40482213	intron;Il18r1;protein_coding;ENSMUSG00000026070.15	18.2067	+
chr1	40482524	40482533	intron;Il18r1;protein_coding;ENSMUSG00000026070.15	5.79067	+
chr1	40482982	40482991	intron;Il18r1;protein_coding;ENSMUSG00000026070.15	15.8696	+
chr1	40482992	40483001	intron;Il18r1;protein_coding;ENSMUSG00000026070.15	2.38336	+
chr1	40483241	40483250	intron;Il18r1;protein_coding;ENSMUSG00000026070.15	22.5093	+
chr1	40483461	40483470	intron;Il18r1;protein_coding;ENSMUSG00000026070.15	18.005	+
chr1	40483477	40483486	intron;Il18r1;protein_coding;ENSMUSG00000026070.15	14.9238	+
chr1	43114251	43114260	three_prime_UTR;AI597479;protein_coding;ENSMUSG00000010290.7	34.5002	+
chr1	43114750	43114759	three_prime_UTR;AI597479;protein_coding;ENSMUSG00000010290.7	19.3422	+
chr1	43114771	43114780	three_prime_UTR;AI597479;protein_coding;ENSMUSG00000010290.7	70.4208	+
chr1	43114795	43114804	three_prime_UTR;AI597479;protein_coding;ENSMUSG00000010290.7	40.6339	+
chr1	43115680	43115689	three_prime_UTR;AI597479;protein_coding;ENSMUSG00000010290.7	7.94055	+
chr1	43115837	43115846	three_prime_UTR;AI597479;protein_coding;ENSMUSG00000010290.7	21.1711	+
chr1	43115853	43115862	three_prime_UTR;AI597479;protein_coding;ENSMUSG00000010290.7	4.7871	+
chr1	43115869	43115878	three_prime_UTR;AI597479;protein_coding;ENSMUSG00000010290.7	4.93703	+
chr1	43749594	43749603	three_prime_UTR;Uxs1;protein_coding;ENSMUSG00000057363.12	31.2778	-
chr1	43978426	43978435	three_prime_UTR;Tpp2;protein_coding;ENSMUSG00000041763.14	28.6025	+
chr1	46807901	46807910	three_prime_UTR;Slc39a10;protein_coding;ENSMUSG00000025986.6	7.51041	-
chr1	46809238	46809247	three_prime_UTR;Slc39a10;protein_coding;ENSMUSG00000025986.6	29.5428	-
chr1	51469748	51469757	three_prime_UTR;Nabp1;protein_coding;ENSMUSG00000026107.11	6.19751	-
chr1	51469788	51469797	three_prime_UTR;Nabp1;protein_coding;ENSMUSG00000026107.11	18.9559	-
chr1	51469826	51469835	three_prime_UTR;Nabp1;protein_coding;ENSMUSG00000026107.11	14.4921	-
chr1	51469983	51469992	three_prime_UTR;Nabp1;protein_coding;ENSMUSG00000026107.11	20.6479	-
chr1	51470556	51470565	three_prime_UTR;Nabp1;protein_coding;ENSMUSG00000026107.11	21.3494	-
chr1	51470885	51470894	three_prime_UTR;Nabp1;protein_coding;ENSMUSG00000026107.11	4.75499	-
chr1	51470897	51470906	three_prime_UTR;Nabp1;protein_coding;ENSMUSG00000026107.11	41.9623	-
chr1	51470929	51470938	three_prime_UTR;Nabp1;protein_coding;ENSMUSG00000026107.11	27.2	-
chr1	51470944	51470953	three_prime_UTR;Nabp1;protein_coding;ENSMUSG00000026107.11	70.4771	-
chr1	51470958	51470967	three_prime_UTR;Nabp1;protein_coding;ENSMUSG00000026107.11	44.7585	-
chr1	51470972	51470981	three_prime_UTR;Nabp1;protein_coding;ENSMUSG00000026107.11	12.5556	-
chr1	51471144	51471153	three_prime_UTR;Nabp1;protein_coding;ENSMUSG00000026107.11	6.4123	-
chr1	51471270	51471279	CDS;Nabp1;protein_coding;ENSMUSG00000026107.11	19.3756	-
chr1	52008688	52008697	five_prime_UTR;Stat4;protein_coding;ENSMUSG00000062939.11	10.8187	+
chr1	52008717	52008726	five_prime_UTR;Stat4;protein_coding;ENSMUSG00000062939.11	9.0663	+
chr1	52011859	52011868	CDS;Stat4;protein_coding;ENSMUSG00000062939.11	38.7843	+
chr1	52011871	52011880	CDS;Stat4;protein_coding;ENSMUSG00000062939.11	102.856	+
chr1	52013799	52013808	CDS;Stat4;protein_coding;ENSMUSG00000062939.11	20.9147	+
chr1	52013821	52013830	CDS;Stat4;protein_coding;ENSMUSG00000062939.11	33.8853	+
chr1	52156066	52156075	three_prime_UTR;Stat1;protein_coding;ENSMUSG00000026104.14	35.1256	+
chr1	52159321	52159330	three_prime_UTR;Stat1;protein_coding;ENSMUSG00000026104.14	1.87491	+
chr1	52159603	52159612	three_prime_UTR;Stat1;protein_coding;ENSMUSG00000026104.14	9.35469	+
chr1	52160105	52160114	three_prime_UTR;Stat1;protein_coding;ENSMUSG00000026104.14	36.2012	+
chr1	52160487	52160496	three_prime_UTR;Stat1;protein_coding;ENSMUSG00000026104.14	1.62693	+
chr1	52160633	52160642	three_prime_UTR;Stat1;protein_coding;ENSMUSG00000026104.14	15.8628	+
chr1	52160663	52160672	three_prime_UTR;Stat1;protein_coding;ENSMUSG00000026104.14	3.01253	+
chr1	52160754	52160763	three_prime_UTR;Stat1;protein_coding;ENSMUSG00000026104.14	14.577	+
chr1	52160809	52160818	three_prime_UTR;Stat1;protein_coding;ENSMUSG00000026104.14	64.0907	+
chr1	52160843	52160852	three_prime_UTR;Stat1;protein_coding;ENSMUSG00000026104.14	28.9073	+
chr1	52160854	52160863	three_prime_UTR;Stat1;protein_coding;ENSMUSG00000026104.14	22.0258	+
chr1	52160875	52160884	three_prime_UTR;Stat1;protein_coding;ENSMUSG00000026104.14	300.446	+
chr1	52185325	52185334	three_prime_UTR;Gls;protein_coding;ENSMUSG00000026103.14	17.4308	-
chr1	52185356	52185365	three_prime_UTR;Gls;protein_coding;ENSMUSG00000026103.14	6.83522	-
chr1	52185426	52185435	three_prime_UTR;Gls;protein_coding;ENSMUSG00000026103.14	30.655	-
chr1	52185480	52185489	three_prime_UTR;Gls;protein_coding;ENSMUSG00000026103.14	37.5092	-
chr1	52185541	52185550	three_prime_UTR;Gls;protein_coding;ENSMUSG00000026103.14	11.3877	-
chr1	52185585	52185594	three_prime_UTR;Gls;protein_coding;ENSMUSG00000026103.14	167.567	-
chr1	52185622	52185631	three_prime_UTR;Gls;protein_coding;ENSMUSG00000026103.14	2.32816	-
chr1	52185697	52185706	three_prime_UTR;Gls;protein_coding;ENSMUSG00000026103.14	2.96724	-
chr1	52185720	52185729	three_prime_UTR;Gls;protein_coding;ENSMUSG00000026103.14	19.8033	-
chr1	52185739	52185748	three_prime_UTR;Gls;protein_coding;ENSMUSG00000026103.14	8.59036	-
chr1	52185808	52185817	three_prime_UTR;Gls;protein_coding;ENSMUSG00000026103.14	1.94325	-
chr1	52185942	52185951	three_prime_UTR;Gls;protein_coding;ENSMUSG00000026103.14	4.04032	-
chr1	52185964	52185973	three_prime_UTR;Gls;protein_coding;ENSMUSG00000026103.14	1.64654	-
chr1	52186047	52186056	three_prime_UTR;Gls;protein_coding;ENSMUSG00000026103.14	2.8127	-
chr1	52186150	52186159	three_prime_UTR;Gls;protein_coding;ENSMUSG00000026103.14	23.2916	-
chr1	52186360	52186369	three_prime_UTR;Gls;protein_coding;ENSMUSG00000026103.14	2.31732	-
chr1	52186375	52186384	three_prime_UTR;Gls;protein_coding;ENSMUSG00000026103.14	31.7061	-
chr1	52186394	52186403	three_prime_UTR;Gls;protein_coding;ENSMUSG00000026103.14	4.35266	-
chr1	52186429	52186438	three_prime_UTR;Gls;protein_coding;ENSMUSG00000026103.14	22.5215	-
chr1	52186472	52186481	three_prime_UTR;Gls;protein_coding;ENSMUSG00000026103.14	18.6765	-
chr1	52186493	52186502	three_prime_UTR;Gls;protein_coding;ENSMUSG00000026103.14	18.2562	-
chr1	52187308	52187317	three_prime_UTR;Gls;protein_coding;ENSMUSG00000026103.14	17.2734	-
chr1	52187455	52187464	three_prime_UTR;Gls;protein_coding;ENSMUSG00000026103.14	17.6695	-
chr1	52187465	52187474	three_prime_UTR;Gls;protein_coding;ENSMUSG00000026103.14	47.1722	-
chr1	52187483	52187492	three_prime_UTR;Gls;protein_coding;ENSMUSG00000026103.14	6.50158	-
chr1	52789489	52789498	three_prime_UTR;Inpp1;protein_coding;ENSMUSG00000026102.9	5.89742	-
chr1	52789522	52789531	three_prime_UTR;Inpp1;protein_coding;ENSMUSG00000026102.9	9.1883	-
chr1	52789553	52789562	three_prime_UTR;Inpp1;protein_coding;ENSMUSG00000026102.9	2.04401	-
chr1	52789603	52789612	three_prime_UTR;Inpp1;protein_coding;ENSMUSG00000026102.9	16.4009	-
chr1	52789622	52789631	three_prime_UTR;Inpp1;protein_coding;ENSMUSG00000026102.9	6.70278	-
chr1	53755673	53755682	three_prime_UTR;Stk17b;protein_coding;ENSMUSG00000026094.14	12.2313	-
chr1	53756164	53756173	three_prime_UTR;Stk17b;protein_coding;ENSMUSG00000026094.14	1.35361	-
chr1	53756186	53756195	three_prime_UTR;Stk17b;protein_coding;ENSMUSG00000026094.14	224.978	-
chr1	53756684	53756693	three_prime_UTR;Stk17b;protein_coding;ENSMUSG00000026094.14	3.02007	-
chr1	53756710	53756719	three_prime_UTR;Stk17b;protein_coding;ENSMUSG00000026094.14	16.0859	-
chr1	53756840	53756849	three_prime_UTR;Stk17b;protein_coding;ENSMUSG00000026094.14	3.87501	-
chr1	53756872	53756881	three_prime_UTR;Stk17b;protein_coding;ENSMUSG00000026094.14	13.3199	-
chr1	53756886	53756895	three_prime_UTR;Stk17b;protein_coding;ENSMUSG00000026094.14	2.60209	-
chr1	53757010	53757019	three_prime_UTR;Stk17b;protein_coding;ENSMUSG00000026094.14	9.15816	-
chr1	53757088	53757097	three_prime_UTR;Stk17b;protein_coding;ENSMUSG00000026094.14	26.7695	-
chr1	53757104	53757113	three_prime_UTR;Stk17b;protein_coding;ENSMUSG00000026094.14	6.26616	-
chr1	53757192	53757201	three_prime_UTR;Stk17b;protein_coding;ENSMUSG00000026094.14	2.31165	-
chr1	53757252	53757261	three_prime_UTR;Stk17b;protein_coding;ENSMUSG00000026094.14	24.1305	-
chr1	53757265	53757274	three_prime_UTR;Stk17b;protein_coding;ENSMUSG00000026094.14	8.56527	-
chr1	53757352	53757361	three_prime_UTR;Stk17b;protein_coding;ENSMUSG00000026094.14	1.05259	-
chr1	53757405	53757414	three_prime_UTR;Stk17b;protein_coding;ENSMUSG00000026094.14	71.8222	-
chr1	53757420	53757429	three_prime_UTR;Stk17b;protein_coding;ENSMUSG00000026094.14	33.0608	-
chr1	53757666	53757675	CDS;Stk17b;protein_coding;ENSMUSG00000026094.14	5.34607	-
chr1	53757693	53757702	CDS;Stk17b;protein_coding;ENSMUSG00000026094.14	12.914	-
chr1	53761027	53761036	CDS;Stk17b;protein_coding;ENSMUSG00000026094.14	6.42692	-
chr1	53761038	53761047	CDS;Stk17b;protein_coding;ENSMUSG00000026094.14	4.43097	-
chr1	53761151	53761160	CDS;Stk17b;protein_coding;ENSMUSG00000026094.14	12.8097	-
chr1	53762589	53762598	CDS;Stk17b;protein_coding;ENSMUSG00000026094.14	3.45443	-
chr1	53765230	53765239	intron;Stk17b;protein_coding;ENSMUSG00000026094.14	9.9243	-
chr1	53765291	53765300	intron;Stk17b;protein_coding;ENSMUSG00000026094.14	6.40417	-
chr1	53765383	53765392	intron;Stk17b;protein_coding;ENSMUSG00000026094.14	9.26468	-
chr1	53765525	53765534	intron;Stk17b;protein_coding;ENSMUSG00000026094.14	6.96162	-
chr1	53765564	53765573	intron;Stk17b;protein_coding;ENSMUSG00000026094.14	5.49893	-
chr1	53765576	53765585	intron;Stk17b;protein_coding;ENSMUSG00000026094.14	5.14803	-
chr1	53765748	53765757	intron;Stk17b;protein_coding;ENSMUSG00000026094.14	10.4085	-
chr1	53765939	53765948	CDS;Stk17b;protein_coding;ENSMUSG00000026094.14	1.0354	-
chr1	53765957	53765966	CDS;Stk17b;protein_coding;ENSMUSG00000026094.14	10.7914	-
chr1	53766040	53766049	five_prime_UTR;Stk17b;protein_coding;ENSMUSG00000026094.14	16.553	-
chr1	53766394	53766403	intron;Stk17b;protein_coding;ENSMUSG00000026094.14	11.9436	-
chr1	53766423	53766432	intron;Stk17b;protein_coding;ENSMUSG00000026094.14	26.8585	-
chr1	54645457	54645466	three_prime_UTR;Ankrd44;protein_coding;ENSMUSG00000052331.14	9.5313	-
chr1	54645474	54645483	three_prime_UTR;Ankrd44;protein_coding;ENSMUSG00000052331.14	4.7327	-
chr1	54645577	54645586	three_prime_UTR;Ankrd44;protein_coding;ENSMUSG00000052331.14	27.3898	-
chr1	54646575	54646584	three_prime_UTR;Ankrd44;protein_coding;ENSMUSG00000052331.14	4.32726	-
chr1	54647072	54647081	three_prime_UTR;Ankrd44;protein_coding;ENSMUSG00000052331.14	3.76062	-
chr1	54648369	54648378	exon;Ankrd44;protein_coding;ENSMUSG00000052331.14	16.0953	-
chr1	54648399	54648408	exon;Ankrd44;protein_coding;ENSMUSG00000052331.14	8.66659	-
chr1	54648438	54648447	exon;Ankrd44;protein_coding;ENSMUSG00000052331.14	20.394	-
chr1	54649123	54649132	three_prime_UTR;Ankrd44;protein_coding;ENSMUSG00000052331.14	12.7926	-
chr1	54657668	54657677	CDS;Ankrd44;protein_coding;ENSMUSG00000052331.14	1.119	-
chr1	54657693	54657702	CDS;Ankrd44;protein_coding;ENSMUSG00000052331.14	151.668	-
chr1	54658929	54658938	CDS;Ankrd44;protein_coding;ENSMUSG00000052331.14	1.96078	-
chr1	54663978	54663987	CDS;Ankrd44;protein_coding;ENSMUSG00000052331.14	19.3354	-
chr1	54815176	54815185	intron;Ankrd44;protein_coding;ENSMUSG00000052331.14	6.5466	-
chr1	54819651	54819660	intron;Ankrd44;protein_coding;ENSMUSG00000052331.14	27.2533	-
chr1	54822802	54822811	intron;Ankrd44;protein_coding;ENSMUSG00000052331.14	5.4334	-
chr1	54822830	54822839	intron;Ankrd44;protein_coding;ENSMUSG00000052331.14	26.4444	-
chr1	54987070	54987079	three_prime_UTR;Sf3b1;protein_coding;ENSMUSG00000025982.13	10.7988	-
chr1	54987081	54987090	three_prime_UTR;Sf3b1;protein_coding;ENSMUSG00000025982.13	13.0096	-
chr1	54987096	54987105	three_prime_UTR;Sf3b1;protein_coding;ENSMUSG00000025982.13	27.5	-
chr1	54987138	54987147	three_prime_UTR;Sf3b1;protein_coding;ENSMUSG00000025982.13	51.8879	-
chr1	54987176	54987185	three_prime_UTR;Sf3b1;protein_coding;ENSMUSG00000025982.13	7.42115	-
chr1	55153007	55153016	three_prime_UTR;Mob4;protein_coding;ENSMUSG00000025979.13	1.07562	+
chr1	58401410	58401419	three_prime_UTR;Bzw1;protein_coding;ENSMUSG00000051223.14	20.1888	+
chr1	58401450	58401459	three_prime_UTR;Bzw1;protein_coding;ENSMUSG00000051223.14	24.2186	+
chr1	58402885	58402894	intron;Bzw1;protein_coding;ENSMUSG00000051223.14	143.558	+
chr1	58402916	58402925	three_prime_UTR;Bzw1;protein_coding;ENSMUSG00000051223.14	5.87277	+
chr1	58406090	58406099	three_prime_UTR;Bzw1;protein_coding;ENSMUSG00000051223.14	75.3412	+
chr1	58412152	58412161	three_prime_UTR;Clk1;protein_coding;ENSMUSG00000026034.17	415.742	-
chr1	58412185	58412194	three_prime_UTR;Clk1;protein_coding;ENSMUSG00000026034.17	196.716	-
chr1	58412218	58412227	three_prime_UTR;Clk1;protein_coding;ENSMUSG00000026034.17	1.43215	-
chr1	58412331	58412340	three_prime_UTR;Clk1;protein_coding;ENSMUSG00000026034.17	1.6831	-
chr1	58412648	58412657	three_prime_UTR;Clk1;protein_coding;ENSMUSG00000026034.17	0.788194	-
chr1	58412666	58412675	three_prime_UTR;Clk1;protein_coding;ENSMUSG00000026034.17	130.31	-
chr1	58412687	58412696	three_prime_UTR;Clk1;protein_coding;ENSMUSG00000026034.17	9.43992	-
chr1	58412703	58412712	three_prime_UTR;Clk1;protein_coding;ENSMUSG00000026034.17	21.9636	-
chr1	58412722	58412731	three_prime_UTR;Clk1;protein_coding;ENSMUSG00000026034.17	17.8158	-
chr1	58412952	58412961	three_prime_UTR;Clk1;protein_coding;ENSMUSG00000026034.17	38.0691	-
chr1	58412970	58412979	three_prime_UTR;Clk1;protein_coding;ENSMUSG00000026034.17	17.9154	-
chr1	58413017	58413026	three_prime_UTR;Clk1;protein_coding;ENSMUSG00000026034.17	17.7276	-
chr1	58413418	58413427	three_prime_UTR;Clk1;protein_coding;ENSMUSG00000026034.17	22.0029	-
chr1	58413449	58413458	three_prime_UTR;Clk1;protein_coding;ENSMUSG00000026034.17	3.07364	-
chr1	58413470	58413479	three_prime_UTR;Clk1;protein_coding;ENSMUSG00000026034.17	19.7025	-
chr1	58414373	58414382	three_prime_UTR;Clk1;protein_coding;ENSMUSG00000026034.17	69.191	-
chr1	58414433	58414442	three_prime_UTR;Clk1;protein_coding;ENSMUSG00000026034.17	2.87662	-
chr1	58414611	58414620	three_prime_UTR;Clk1;protein_coding;ENSMUSG00000026034.17	17.9556	-
chr1	58414625	58414634	three_prime_UTR;Clk1;protein_coding;ENSMUSG00000026034.17	25.3276	-
chr1	58414649	58414658	three_prime_UTR;Clk1;protein_coding;ENSMUSG00000026034.17	16.0569	-
chr1	58417014	58417023	three_prime_UTR;Clk1;protein_coding;ENSMUSG00000026034.17	6.38105	-
chr1	58417060	58417069	three_prime_UTR;Clk1;protein_coding;ENSMUSG00000026034.17	12.4637	-
chr1	58417072	58417081	three_prime_UTR;Clk1;protein_coding;ENSMUSG00000026034.17	14.8226	-
chr1	58417102	58417111	three_prime_UTR;Clk1;protein_coding;ENSMUSG00000026034.17	3.55544	-
chr1	58417117	58417126	three_prime_UTR;Clk1;protein_coding;ENSMUSG00000026034.17	30.5769	-
chr1	58417129	58417138	three_prime_UTR;Clk1;protein_coding;ENSMUSG00000026034.17	25.4382	-
chr1	58417176	58417185	three_prime_UTR;Clk1;protein_coding;ENSMUSG00000026034.17	19.7995	-
chr1	58417281	58417290	three_prime_UTR;Clk1;protein_coding;ENSMUSG00000026034.17	17.9551	-
chr1	58417299	58417308	three_prime_UTR;Clk1;protein_coding;ENSMUSG00000026034.17	18.7486	-
chr1	58417373	58417382	three_prime_UTR;Clk1;protein_coding;ENSMUSG00000026034.17	10.0536	-
chr1	58419628	58419637	intron;Clk1;protein_coding;ENSMUSG00000026034.17	13.7099	-
chr1	58419669	58419678	three_prime_UTR;Clk1;protein_coding;ENSMUSG00000026034.17	24.0102	-
chr1	58419681	58419690	three_prime_UTR;Clk1;protein_coding;ENSMUSG00000026034.17	9.87493	-
chr1	58424019	58424028	five_prime_UTR;Clk1;protein_coding;ENSMUSG00000026034.17	46.1061	-
chr1	58528402	58528411	three_prime_UTR;Fam126b;protein_coding;ENSMUSG00000038174.14	28.5775	-
chr1	58754199	58754208	three_prime_UTR;Cflar;protein_coding;ENSMUSG00000026031.15	6.91097	+
chr1	58757805	58757814	three_prime_UTR;Cflar;protein_coding;ENSMUSG00000026031.15	9.89343	+
chr1	58757824	58757833	three_prime_UTR;Cflar;protein_coding;ENSMUSG00000026031.15	2.13639	+
chr1	58758592	58758601	three_prime_UTR;Cflar;protein_coding;ENSMUSG00000026031.15	21.4377	+
chr1	58758620	58758629	three_prime_UTR;Cflar;protein_coding;ENSMUSG00000026031.15	18.0819	+
chr1	58758632	58758641	three_prime_UTR;Cflar;protein_coding;ENSMUSG00000026031.15	46.0104	+
chr1	58758649	58758658	three_prime_UTR;Cflar;protein_coding;ENSMUSG00000026031.15	21.1129	+
chr1	58758750	58758759	three_prime_UTR;Cflar;protein_coding;ENSMUSG00000026031.15	69.3913	+
chr1	58758801	58758810	three_prime_UTR;Cflar;protein_coding;ENSMUSG00000026031.15	3.78725	+
chr1	58758840	58758849	three_prime_UTR;Cflar;protein_coding;ENSMUSG00000026031.15	60.9825	+
chr1	58995014	58995023	three_prime_UTR;Stradb;protein_coding;ENSMUSG00000026027.13	25.1126	+
chr1	58995046	58995055	three_prime_UTR;Stradb;protein_coding;ENSMUSG00000026027.13	3.30905	+
chr1	59704672	59704681	CDS;Nop58;protein_coding;ENSMUSG00000026020.9	30.5009	+
chr1	59704682	59704691	CDS;Nop58;protein_coding;ENSMUSG00000026020.9	5.993	+
chr1	60479796	60479805	three_prime_UTR;Abi2;protein_coding;ENSMUSG00000026782.15	25.9336	+
chr1	60479928	60479937	three_prime_UTR;Abi2;protein_coding;ENSMUSG00000026782.15	1.16566	+
chr1	60770098	60770107	three_prime_UTR;Cd28;protein_coding;ENSMUSG00000026012.2	9.92164	+
chr1	60770148	60770157	three_prime_UTR;Cd28;protein_coding;ENSMUSG00000026012.2	4.76133	+
chr1	60770178	60770187	three_prime_UTR;Cd28;protein_coding;ENSMUSG00000026012.2	3.48004	+
chr1	60770203	60770212	three_prime_UTR;Cd28;protein_coding;ENSMUSG00000026012.2	37.5729	+
chr1	60770229	60770238	three_prime_UTR;Cd28;protein_coding;ENSMUSG00000026012.2	53.9543	+
chr1	60770255	60770264	three_prime_UTR;Cd28;protein_coding;ENSMUSG00000026012.2	7.38015	+
chr1	60770269	60770278	three_prime_UTR;Cd28;protein_coding;ENSMUSG00000026012.2	2.40083	+
chr1	60770298	60770307	three_prime_UTR;Cd28;protein_coding;ENSMUSG00000026012.2	3.20934	+
chr1	60770314	60770323	three_prime_UTR;Cd28;protein_coding;ENSMUSG00000026012.2	20.0945	+
chr1	60770365	60770374	three_prime_UTR;Cd28;protein_coding;ENSMUSG00000026012.2	14.2302	+
chr1	60770386	60770395	three_prime_UTR;Cd28;protein_coding;ENSMUSG00000026012.2	18.7054	+
chr1	60770520	60770529	three_prime_UTR;Cd28;protein_coding;ENSMUSG00000026012.2	3.40585	+
chr1	60770686	60770695	three_prime_UTR;Cd28;protein_coding;ENSMUSG00000026012.2	9.13179	+
chr1	60771196	60771205	three_prime_UTR;Cd28;protein_coding;ENSMUSG00000026012.2	21.4747	+
chr1	60771214	60771223	three_prime_UTR;Cd28;protein_coding;ENSMUSG00000026012.2	0.824375	+
chr1	60772853	60772862	three_prime_UTR;Cd28;protein_coding;ENSMUSG00000026012.2	6.03059	+
chr1	60773295	60773304	three_prime_UTR;Cd28;protein_coding;ENSMUSG00000026012.2	24.3702	+
chr1	60915690	60915699	three_prime_UTR;Ctla4;protein_coding;ENSMUSG00000026011.13	14.3769	+
chr1	60915749	60915758	three_prime_UTR;Ctla4;protein_coding;ENSMUSG00000026011.13	134.912	+
chr1	60994032	60994041	CDS;Icos;protein_coding;ENSMUSG00000026009.14	40.0062	+
chr1	60994606	60994615	intron;Icos;protein_coding;ENSMUSG00000026009.14	24.6912	+
chr1	60994633	60994642	CDS;Icos;protein_coding;ENSMUSG00000026009.14	24.6253	+
chr1	60997785	60997794	three_prime_UTR;Icos;protein_coding;ENSMUSG00000026009.14	43.1503	+
chr1	60997813	60997822	three_prime_UTR;Icos;protein_coding;ENSMUSG00000026009.14	9.96914	+
chr1	60998029	60998038	three_prime_UTR;Icos;protein_coding;ENSMUSG00000026009.14	9.71951	+
chr1	60998054	60998063	three_prime_UTR;Icos;protein_coding;ENSMUSG00000026009.14	8.65238	+
chr1	60998695	60998704	three_prime_UTR;Icos;protein_coding;ENSMUSG00000026009.14	115.182	+
chr1	60998864	60998873	three_prime_UTR;Icos;protein_coding;ENSMUSG00000026009.14	3.8807	+
chr1	60998893	60998902	three_prime_UTR;Icos;protein_coding;ENSMUSG00000026009.14	0.932435	+
chr1	60999236	60999245	three_prime_UTR;Icos;protein_coding;ENSMUSG00000026009.14	46.657	+
chr1	60999264	60999273	three_prime_UTR;Icos;protein_coding;ENSMUSG00000026009.14	108.653	+
chr1	60999277	60999286	three_prime_UTR;Icos;protein_coding;ENSMUSG00000026009.14	233.053	+
chr1	60999376	60999385	three_prime_UTR;Icos;protein_coding;ENSMUSG00000026009.14	19.5786	+
chr1	60999415	60999424	three_prime_UTR;Icos;protein_coding;ENSMUSG00000026009.14	2.35328	+
chr1	60999487	60999496	three_prime_UTR;Icos;protein_coding;ENSMUSG00000026009.14	161.436	+
chr1	60999498	60999507	three_prime_UTR;Icos;protein_coding;ENSMUSG00000026009.14	178.938	+
chr1	60999526	60999535	three_prime_UTR;Icos;protein_coding;ENSMUSG00000026009.14	2.10376	+
chr1	60999543	60999552	three_prime_UTR;Icos;protein_coding;ENSMUSG00000026009.14	122.276	+
chr1	60999617	60999626	three_prime_UTR;Icos;protein_coding;ENSMUSG00000026009.14	60.468	+
chr1	60999701	60999710	three_prime_UTR;Icos;protein_coding;ENSMUSG00000026009.14	144.297	+
chr1	60999738	60999747	three_prime_UTR;Icos;protein_coding;ENSMUSG00000026009.14	11.5488	+
chr1	60999784	60999793	three_prime_UTR;Icos;protein_coding;ENSMUSG00000026009.14	243.266	+
chr1	60999804	60999813	three_prime_UTR;Icos;protein_coding;ENSMUSG00000026009.14	121.771	+
chr1	60999817	60999826	three_prime_UTR;Icos;protein_coding;ENSMUSG00000026009.14	27.0521	+
chr1	60999832	60999841	three_prime_UTR;Icos;protein_coding;ENSMUSG00000026009.14	138.487	+
chr1	60999847	60999856	three_prime_UTR;Icos;protein_coding;ENSMUSG00000026009.14	72.7305	+
chr1	60999862	60999871	three_prime_UTR;Icos;protein_coding;ENSMUSG00000026009.14	151.725	+
chr1	60999886	60999895	three_prime_UTR;Icos;protein_coding;ENSMUSG00000026009.14	55.7948	+
chr1	60999973	60999982	three_prime_UTR;Icos;protein_coding;ENSMUSG00000026009.14	66.5785	+
chr1	61000031	61000040	three_prime_UTR;Icos;protein_coding;ENSMUSG00000026009.14	158.997	+
chr1	61000062	61000071	three_prime_UTR;Icos;protein_coding;ENSMUSG00000026009.14	24.7999	+
chr1	61000087	61000096	three_prime_UTR;Icos;protein_coding;ENSMUSG00000026009.14	69.6475	+
chr1	61000102	61000111	three_prime_UTR;Icos;protein_coding;ENSMUSG00000026009.14	14.1517	+
chr1	61000157	61000166	three_prime_UTR;Icos;protein_coding;ENSMUSG00000026009.14	80.9722	+
chr1	61000191	61000200	three_prime_UTR;Icos;protein_coding;ENSMUSG00000026009.14	45.9697	+
chr1	61000221	61000230	three_prime_UTR;Icos;protein_coding;ENSMUSG00000026009.14	32.8963	+
chr1	63049915	63049924	three_prime_UTR;Ino80d;protein_coding;ENSMUSG00000040865.15	86.4594	-
chr1	63054211	63054220	three_prime_UTR;Ino80d;protein_coding;ENSMUSG00000040865.15	7.72646	-
chr1	63054481	63054490	three_prime_UTR;Ino80d;protein_coding;ENSMUSG00000040865.15	55.1605	-
chr1	63054519	63054528	three_prime_UTR;Ino80d;protein_coding;ENSMUSG00000040865.15	5.88721	-
chr1	63177131	63177140	five_prime_UTR;Eef1b2;protein_coding;ENSMUSG00000025967.16	188.171	+
chr1	63178493	63178502	three_prime_UTR;Eef1b2;protein_coding;ENSMUSG00000025967.16	23.1635	+
chr1	63178510	63178519	three_prime_UTR;Eef1b2;protein_coding;ENSMUSG00000025967.16	16.8234	+
chr1	63178546	63178555	three_prime_UTR;Eef1b2;protein_coding;ENSMUSG00000025967.16	2.92125	+
chr1	63178997	63179006	intron;Eef1b2;protein_coding;ENSMUSG00000025967.16	58.0657	+
chr1	63731505	63731514	CDS;Fastkd2;protein_coding;ENSMUSG00000025962.15	13.1862	+
chr1	63731522	63731531	CDS;Fastkd2;protein_coding;ENSMUSG00000025962.15	6.18859	+
chr1	63745862	63745871	CDS;Fastkd2;protein_coding;ENSMUSG00000025962.15	14.9716	+
chr1	63745923	63745932	CDS;Fastkd2;protein_coding;ENSMUSG00000025962.15	2.04592	+
chr1	64600364	64600373	three_prime_UTR;Creb1;protein_coding;ENSMUSG00000025958.14	2.31118	+
chr1	64600382	64600391	three_prime_UTR;Creb1;protein_coding;ENSMUSG00000025958.14	16.4777	+
chr1	64600399	64600408	three_prime_UTR;Creb1;protein_coding;ENSMUSG00000025958.14	14.5201	+
chr1	64601585	64601594	three_prime_UTR;Creb1;protein_coding;ENSMUSG00000025958.14	4.52109	+
chr1	64601595	64601604	three_prime_UTR;Creb1;protein_coding;ENSMUSG00000025958.14	1.46062	+
chr1	64601682	64601691	three_prime_UTR;Creb1;protein_coding;ENSMUSG00000025958.14	5.27349	+
chr1	64601803	64601812	three_prime_UTR;Creb1;protein_coding;ENSMUSG00000025958.14	49.7345	+
chr1	64601816	64601825	three_prime_UTR;Creb1;protein_coding;ENSMUSG00000025958.14	45.9964	+
chr1	64601831	64601840	three_prime_UTR;Creb1;protein_coding;ENSMUSG00000025958.14	4.13513	+
chr1	64602236	64602245	three_prime_UTR;Creb1;protein_coding;ENSMUSG00000025958.14	8.76413	+
chr1	64602274	64602283	three_prime_UTR;Creb1;protein_coding;ENSMUSG00000025958.14	10.4037	+
chr1	64602875	64602884	three_prime_UTR;Creb1;protein_coding;ENSMUSG00000025958.14	20.078	+
chr1	65273795	65273804	three_prime_UTR;Pikfyve;protein_coding;ENSMUSG00000025949.16	1.00759	+
chr1	65273818	65273827	three_prime_UTR;Pikfyve;protein_coding;ENSMUSG00000025949.16	30.7513	+
chr1	65274425	65274434	three_prime_UTR;Pikfyve;protein_coding;ENSMUSG00000025949.16	17.0171	+
chr1	65274444	65274453	three_prime_UTR;Pikfyve;protein_coding;ENSMUSG00000025949.16	19.7177	+
chr1	66714700	66714709	three_prime_UTR;Rpe;protein_coding;ENSMUSG00000026005.15	27.1679	+
chr1	66715105	66715114	intron;Rpe;protein_coding;ENSMUSG00000026005.15	24.5855	+
chr1	66715143	66715152	three_prime_UTR;Rpe;protein_coding;ENSMUSG00000026005.15	20.6526	+
chr1	66718373	66718382	three_prime_UTR;Rpe;protein_coding;ENSMUSG00000026005.15	1.63481	+
chr1	66718417	66718426	three_prime_UTR;Rpe;protein_coding;ENSMUSG00000026005.15	16.0669	+
chr1	66718439	66718448	three_prime_UTR;Rpe;protein_coding;ENSMUSG00000026005.15	18.2478	+
chr1	71027631	71027640	three_prime_UTR;Bard1;protein_coding;ENSMUSG00000026196.7	48.7946	-
chr1	71028362	71028371	three_prime_UTR;Bard1;protein_coding;ENSMUSG00000026196.7	5.458	-
chr1	71029519	71029528	three_prime_UTR;Bard1;protein_coding;ENSMUSG00000026196.7	38.3051	-
chr1	71029880	71029889	three_prime_UTR;Bard1;protein_coding;ENSMUSG00000026196.7	1.54889	-
chr1	71030012	71030021	three_prime_UTR;Bard1;protein_coding;ENSMUSG00000026196.7	2.27489	-
chr1	71030448	71030457	three_prime_UTR;Bard1;protein_coding;ENSMUSG00000026196.7	27.42	-
chr1	72339054	72339063	CDS;Xrcc5;protein_coding;ENSMUSG00000026187.9	19.5504	+
chr1	72339067	72339076	CDS;Xrcc5;protein_coding;ENSMUSG00000026187.9	20.5549	+
chr1	74254961	74254970	CDS;Arpc2;protein_coding;ENSMUSG00000006304.14	10.5784	+
chr1	74254972	74254981	CDS;Arpc2;protein_coding;ENSMUSG00000006304.14	6.32116	+
chr1	74254990	74254999	CDS;Arpc2;protein_coding;ENSMUSG00000006304.14	40.333	+
chr1	74256003	74256012	CDS;Arpc2;protein_coding;ENSMUSG00000006304.14	10.0782	+
chr1	74435581	74435590	three_prime_UTR;Usp37;protein_coding;ENSMUSG00000033364.13	2.33125	-
chr1	74435594	74435603	three_prime_UTR;Usp37;protein_coding;ENSMUSG00000033364.13	6.82197	-
chr1	74435611	74435620	three_prime_UTR;Usp37;protein_coding;ENSMUSG00000033364.13	41.5228	-
chr1	74435649	74435658	three_prime_UTR;Usp37;protein_coding;ENSMUSG00000033364.13	167.676	-
chr1	74435666	74435675	three_prime_UTR;Usp37;protein_coding;ENSMUSG00000033364.13	790.969	-
chr1	74435723	74435732	three_prime_UTR;Usp37;protein_coding;ENSMUSG00000033364.13	13.004	-
chr1	74435809	74435818	three_prime_UTR;Usp37;protein_coding;ENSMUSG00000033364.13	0.901077	-
chr1	74436141	74436150	three_prime_UTR;Usp37;protein_coding;ENSMUSG00000033364.13	1.48998	-
chr1	74436168	74436177	three_prime_UTR;Usp37;protein_coding;ENSMUSG00000033364.13	10.3273	-
chr1	74436234	74436243	three_prime_UTR;Usp37;protein_coding;ENSMUSG00000033364.13	5.0993	-
chr1	74436279	74436288	three_prime_UTR;Usp37;protein_coding;ENSMUSG00000033364.13	23.1316	-
chr1	74436439	74436448	three_prime_UTR;Usp37;protein_coding;ENSMUSG00000033364.13	6.46338	-
chr1	74436878	74436887	three_prime_UTR;Usp37;protein_coding;ENSMUSG00000033364.13	18.2612	-
chr1	74437353	74437362	three_prime_UTR;Usp37;protein_coding;ENSMUSG00000033364.13	11.1267	-
chr1	74438093	74438102	three_prime_UTR;Usp37;protein_coding;ENSMUSG00000033364.13	35.5518	-
chr1	74438557	74438566	three_prime_UTR;Usp37;protein_coding;ENSMUSG00000033364.13	6.25771	-
chr1	74438572	74438581	three_prime_UTR;Usp37;protein_coding;ENSMUSG00000033364.13	11.4181	-
chr1	74438733	74438742	three_prime_UTR;Usp37;protein_coding;ENSMUSG00000033364.13	4.82348	-
chr1	74438751	74438760	three_prime_UTR;Usp37;protein_coding;ENSMUSG00000033364.13	18.019	-
chr1	74438763	74438772	three_prime_UTR;Usp37;protein_coding;ENSMUSG00000033364.13	11.8518	-
chr1	74438865	74438874	three_prime_UTR;Usp37;protein_coding;ENSMUSG00000033364.13	47.8919	-
chr1	74438893	74438902	three_prime_UTR;Usp37;protein_coding;ENSMUSG00000033364.13	67.0887	-
chr1	74439156	74439165	three_prime_UTR;Usp37;protein_coding;ENSMUSG00000033364.13	6.52983	-
chr1	74530538	74530547	three_prime_UTR;Cnot9;protein_coding;ENSMUSG00000026174.9	15.7355	+
chr1	74530625	74530634	three_prime_UTR;Cnot9;protein_coding;ENSMUSG00000026174.9	17.7159	+
chr1	74687776	74687785	CDS;Ttll4;protein_coding;ENSMUSG00000033257.14	9.7386	+
chr1	74687787	74687796	CDS;Ttll4;protein_coding;ENSMUSG00000033257.14	16.824	+
chr1	75529427	75529436	CDS;Stk11ip;protein_coding;ENSMUSG00000026213.15	72.6057	+
chr1	79623786	79623795	CDS;Ap1s3;protein_coding;ENSMUSG00000054702.14	23.7384	-
chr1	80568018	80568027	CDS;Dock10;protein_coding;ENSMUSG00000038608.15	239.784	-
chr1	80568032	80568041	CDS;Dock10;protein_coding;ENSMUSG00000038608.15	86.3733	-
chr1	80568444	80568453	CDS;Dock10;protein_coding;ENSMUSG00000038608.15	29.0146	-
chr1	80568455	80568464	CDS;Dock10;protein_coding;ENSMUSG00000038608.15	46.5184	-
chr1	80705035	80705044	intron;Dock10;protein_coding;ENSMUSG00000038608.15	4.18593	-
chr1	80705785	80705794	intron;Dock10;protein_coding;ENSMUSG00000038608.15	16.5338	-
chr1	80706045	80706054	intron;Dock10;protein_coding;ENSMUSG00000038608.15	16.6815	-
chr1	80738458	80738467	intron;Dock10;protein_coding;ENSMUSG00000038608.15	35.3233	-
chr1	80738958	80738967	intron;Dock10;protein_coding;ENSMUSG00000038608.15	1.91189	-
chr1	80740317	80740326	intron;Dock10;protein_coding;ENSMUSG00000038608.15	16.4693	-
chr1	80740348	80740357	intron;Dock10;protein_coding;ENSMUSG00000038608.15	8.528	-
chr1	80740368	80740377	intron;Dock10;protein_coding;ENSMUSG00000038608.15	11.5634	-
chr1	80740400	80740409	intron;Dock10;protein_coding;ENSMUSG00000038608.15	10.3498	-
chr1	80740410	80740419	intron;Dock10;protein_coding;ENSMUSG00000038608.15	2.81711	-
chr1	80740498	80740507	intron;Dock10;protein_coding;ENSMUSG00000038608.15	0.855951	-
chr1	80743980	80743989	intron;Dock10;protein_coding;ENSMUSG00000038608.15	60.5123	-
chr1	82895437	82895446	three_prime_UTR;Agfg1;protein_coding;ENSMUSG00000026159.13	6.21217	+
chr1	82895452	82895461	three_prime_UTR;Agfg1;protein_coding;ENSMUSG00000026159.13	8.46829	+
chr1	82895508	82895517	three_prime_UTR;Agfg1;protein_coding;ENSMUSG00000026159.13	14.5766	+
chr1	84738811	84738820	CDS;Trip12;protein_coding;ENSMUSG00000026219.14	51.3989	-
chr1	85581524	85581533	intron;Sp110;protein_coding;ENSMUSG00000070034.13	113.873	-
chr1	85582857	85582866	intron;Sp110;protein_coding;ENSMUSG00000070034.13	35.5698	-
chr1	86352521	86352530	CDS;Ncl;protein_coding;ENSMUSG00000026234.12	30.4854	-
chr1	86352538	86352547	CDS;Ncl;protein_coding;ENSMUSG00000026234.12	13.8838	-
chr1	87224354	87224363	CDS;Eif4e2;protein_coding;ENSMUSG00000026254.17	33.8651	+
chr1	87224365	87224374	CDS;Eif4e2;protein_coding;ENSMUSG00000026254.17	103.876	+
chr1	87224398	87224407	CDS;Eif4e2;protein_coding;ENSMUSG00000026254.17	17.576	+
chr1	87225897	87225906	CDS;Eif4e2;protein_coding;ENSMUSG00000026254.17	34.3223	+
chr1	87238983	87238992	three_prime_UTR;Eif4e2;protein_coding;ENSMUSG00000026254.17	16.4845	+
chr1	87239014	87239023	three_prime_UTR;Eif4e2;protein_coding;ENSMUSG00000026254.17	19.2502	+
chr1	87239024	87239033	three_prime_UTR;Eif4e2;protein_coding;ENSMUSG00000026254.17	4.66355	+
chr1	87449509	87449518	three_prime_UTR;Gigyf2;protein_coding;ENSMUSG00000048000.15	9.62287	+
chr1	87449944	87449953	three_prime_UTR;Gigyf2;protein_coding;ENSMUSG00000048000.15	10.0875	+
chr1	87449958	87449967	three_prime_UTR;Gigyf2;protein_coding;ENSMUSG00000048000.15	139.651	+
chr1	87449969	87449978	three_prime_UTR;Gigyf2;protein_coding;ENSMUSG00000048000.15	23.3687	+
chr1	87449988	87449997	three_prime_UTR;Gigyf2;protein_coding;ENSMUSG00000048000.15	72.8696	+
chr1	87450027	87450036	three_prime_UTR;Gigyf2;protein_coding;ENSMUSG00000048000.15	6.0097	+
chr1	87450518	87450527	three_prime_UTR;Gigyf2;protein_coding;ENSMUSG00000048000.15	99.5375	+
chr1	87450548	87450557	three_prime_UTR;Gigyf2;protein_coding;ENSMUSG00000048000.15	3.08849	+
chr1	87450685	87450694	three_prime_UTR;Gigyf2;protein_coding;ENSMUSG00000048000.15	12.5181	+
chr1	87719635	87719644	three_prime_UTR;Inpp5d;protein_coding;ENSMUSG00000026288.14	27.3471	+
chr1	87916381	87916390	CDS;Dgkd;protein_coding;ENSMUSG00000070738.10	20.4038	+
chr1	87921587	87921596	CDS;Dgkd;protein_coding;ENSMUSG00000070738.10	2.11399	+
chr1	87924164	87924173	CDS;Dgkd;protein_coding;ENSMUSG00000070738.10	9.80988	+
chr1	87924491	87924500	CDS;Dgkd;protein_coding;ENSMUSG00000070738.10	36.4367	+
chr1	87924532	87924541	CDS;Dgkd;protein_coding;ENSMUSG00000070738.10	78.4368	+
chr1	87924848	87924857	intron;Dgkd;protein_coding;ENSMUSG00000070738.10	4.87964	+
chr1	87925697	87925706	CDS;Dgkd;protein_coding;ENSMUSG00000070738.10	135.444	+
chr1	87925707	87925716	CDS;Dgkd;protein_coding;ENSMUSG00000070738.10	74.495	+
chr1	87925719	87925728	CDS;Dgkd;protein_coding;ENSMUSG00000070738.10	10.8297	+
chr1	87925733	87925742	CDS;Dgkd;protein_coding;ENSMUSG00000070738.10	2.01947	+
chr1	87925743	87925752	CDS;Dgkd;protein_coding;ENSMUSG00000070738.10	36.0451	+
chr1	87946562	87946571	three_prime_UTR;Usp40;protein_coding;ENSMUSG00000005501.14	33.9672	-
chr1	87946577	87946586	three_prime_UTR;Usp40;protein_coding;ENSMUSG00000005501.14	24.96	-
chr1	88263260	88263269	three_prime_UTR;Hjurp;protein_coding;ENSMUSG00000044783.16	4.92418	-
chr1	88263288	88263297	three_prime_UTR;Hjurp;protein_coding;ENSMUSG00000044783.16	24.8058	-
chr1	88263590	88263599	three_prime_UTR;Hjurp;protein_coding;ENSMUSG00000044783.16	32.7638	-
chr1	88263682	88263691	three_prime_UTR;Hjurp;protein_coding;ENSMUSG00000044783.16	19.9999	-
chr1	88263701	88263710	three_prime_UTR;Hjurp;protein_coding;ENSMUSG00000044783.16	29.7151	-
chr1	88264026	88264035	three_prime_UTR;Hjurp;protein_coding;ENSMUSG00000044783.16	20.6253	-
chr1	88264648	88264657	three_prime_UTR;Hjurp;protein_coding;ENSMUSG00000044783.16	43.7456	-
chr1	88264764	88264773	three_prime_UTR;Hjurp;protein_coding;ENSMUSG00000044783.16	9.5235	-
chr1	88264804	88264813	three_prime_UTR;Hjurp;protein_coding;ENSMUSG00000044783.16	6.96323	-
chr1	88264945	88264954	three_prime_UTR;Hjurp;protein_coding;ENSMUSG00000044783.16	13.2011	-
chr1	88265069	88265078	three_prime_UTR;Hjurp;protein_coding;ENSMUSG00000044783.16	8.67211	-
chr1	88265098	88265107	three_prime_UTR;Hjurp;protein_coding;ENSMUSG00000044783.16	120.296	-
chr1	88265110	88265119	three_prime_UTR;Hjurp;protein_coding;ENSMUSG00000044783.16	29.4894	-
chr1	88698272	88698281	three_prime_UTR;Arl4c;protein_coding;ENSMUSG00000049866.12	100.908	-
chr1	88698303	88698312	three_prime_UTR;Arl4c;protein_coding;ENSMUSG00000049866.12	9.87372	-
chr1	88698316	88698325	three_prime_UTR;Arl4c;protein_coding;ENSMUSG00000049866.12	38.8899	-
chr1	88698362	88698371	three_prime_UTR;Arl4c;protein_coding;ENSMUSG00000049866.12	1.08691	-
chr1	88698387	88698396	three_prime_UTR;Arl4c;protein_coding;ENSMUSG00000049866.12	8.0767	-
chr1	88698777	88698786	three_prime_UTR;Arl4c;protein_coding;ENSMUSG00000049866.12	10.5345	-
chr1	88698848	88698857	three_prime_UTR;Arl4c;protein_coding;ENSMUSG00000049866.12	12.3404	-
chr1	88698868	88698877	three_prime_UTR;Arl4c;protein_coding;ENSMUSG00000049866.12	5.09104	-
chr1	88698956	88698965	three_prime_UTR;Arl4c;protein_coding;ENSMUSG00000049866.12	39.2465	-
chr1	88698968	88698977	three_prime_UTR;Arl4c;protein_coding;ENSMUSG00000049866.12	8.48866	-
chr1	88699132	88699141	three_prime_UTR;Arl4c;protein_coding;ENSMUSG00000049866.12	7.47333	-
chr1	88699154	88699163	three_prime_UTR;Arl4c;protein_coding;ENSMUSG00000049866.12	15.0598	-
chr1	88699195	88699204	three_prime_UTR;Arl4c;protein_coding;ENSMUSG00000049866.12	25.713	-
chr1	88699268	88699277	three_prime_UTR;Arl4c;protein_coding;ENSMUSG00000049866.12	193.419	-
chr1	88699285	88699294	three_prime_UTR;Arl4c;protein_coding;ENSMUSG00000049866.12	17.5832	-
chr1	88699402	88699411	three_prime_UTR;Arl4c;protein_coding;ENSMUSG00000049866.12	34.3554	-
chr1	88699419	88699428	three_prime_UTR;Arl4c;protein_coding;ENSMUSG00000049866.12	4.80666	-
chr1	88699793	88699802	three_prime_UTR;Arl4c;protein_coding;ENSMUSG00000049866.12	17.3043	-
chr1	88699820	88699829	three_prime_UTR;Arl4c;protein_coding;ENSMUSG00000049866.12	3.94944	-
chr1	88699830	88699839	three_prime_UTR;Arl4c;protein_coding;ENSMUSG00000049866.12	4.36495	-
chr1	88699841	88699850	three_prime_UTR;Arl4c;protein_coding;ENSMUSG00000049866.12	19.8057	-
chr1	88700093	88700102	three_prime_UTR;Arl4c;protein_coding;ENSMUSG00000049866.12	32.4606	-
chr1	88700131	88700140	three_prime_UTR;Arl4c;protein_coding;ENSMUSG00000049866.12	31.6656	-
chr1	88700264	88700273	three_prime_UTR;Arl4c;protein_coding;ENSMUSG00000049866.12	3.05249	-
chr1	88700303	88700312	three_prime_UTR;Arl4c;protein_coding;ENSMUSG00000049866.12	12.565	-
chr1	88700467	88700476	three_prime_UTR;Arl4c;protein_coding;ENSMUSG00000049866.12	54.8233	-
chr1	88700500	88700509	three_prime_UTR;Arl4c;protein_coding;ENSMUSG00000049866.12	6.58832	-
chr1	88700524	88700533	three_prime_UTR;Arl4c;protein_coding;ENSMUSG00000049866.12	5.35938	-
chr1	88700541	88700550	three_prime_UTR;Arl4c;protein_coding;ENSMUSG00000049866.12	0.669656	-
chr1	88700799	88700808	three_prime_UTR;Arl4c;protein_coding;ENSMUSG00000049866.12	26.6369	-
chr1	88701024	88701033	three_prime_UTR;Arl4c;protein_coding;ENSMUSG00000049866.12	44.535	-
chr1	91116403	91116412	three_prime_UTR;Lrrfip1;protein_coding;ENSMUSG00000026305.15	32.153	+
chr1	91116424	91116433	three_prime_UTR;Lrrfip1;protein_coding;ENSMUSG00000026305.15	131.982	+
chr1	91116456	91116465	three_prime_UTR;Lrrfip1;protein_coding;ENSMUSG00000026305.15	38.6677	+
chr1	91116517	91116526	three_prime_UTR;Lrrfip1;protein_coding;ENSMUSG00000026305.15	24.567	+
chr1	91117080	91117089	three_prime_UTR;Lrrfip1;protein_coding;ENSMUSG00000026305.15	4.09421	+
chr1	93420196	93420205	CDS;Hdlbp;protein_coding;ENSMUSG00000034088.15	16.1452	-
chr1	95588329	95588338	three_prime_UTR;St8sia4;protein_coding;ENSMUSG00000040710.10	6.16102	-
chr1	95612494	95612503	intron;St8sia4;protein_coding;ENSMUSG00000040710.10	17.3056	-
chr1	97706232	97706241	three_prime_UTR;Ppip5k2;protein_coding;ENSMUSG00000040648.14	77.2342	-
chr1	97706242	97706251	three_prime_UTR;Ppip5k2;protein_coding;ENSMUSG00000040648.14	2.14404	-
chr1	97734103	97734112	CDS;Ppip5k2;protein_coding;ENSMUSG00000040648.14	71.663	-
chr1	97735008	97735017	CDS;Ppip5k2;protein_coding;ENSMUSG00000040648.14	13.2864	-
chr1	97735025	97735034	CDS;Ppip5k2;protein_coding;ENSMUSG00000040648.14	34.7982	-
chr1	105753783	105753792	three_prime_UTR;Relch;protein_coding;ENSMUSG00000026319.13	52.4777	+
chr1	105753797	105753806	three_prime_UTR;Relch;protein_coding;ENSMUSG00000026319.13	10.2375	+
chr1	105753847	105753856	three_prime_UTR;Relch;protein_coding;ENSMUSG00000026319.13	63.0248	+
chr1	105753941	105753950	three_prime_UTR;Relch;protein_coding;ENSMUSG00000026319.13	8.54343	+
chr1	105753971	105753980	three_prime_UTR;Relch;protein_coding;ENSMUSG00000026319.13	5.40322	+
chr1	106011726	106011735	CDS;Zcchc2;protein_coding;ENSMUSG00000038866.15	21.5414	+
chr1	106011739	106011748	CDS;Zcchc2;protein_coding;ENSMUSG00000038866.15	36.0876	+
chr1	106033883	106033892	three_prime_UTR;Zcchc2;protein_coding;ENSMUSG00000038866.15	37.1519	+
chr1	106033897	106033906	three_prime_UTR;Zcchc2;protein_coding;ENSMUSG00000038866.15	26.3046	+
chr1	106033918	106033927	three_prime_UTR;Zcchc2;protein_coding;ENSMUSG00000038866.15	8.5012	+
chr1	106393783	106393792	three_prime_UTR;Phlpp1;protein_coding;ENSMUSG00000044340.7	9.12602	+
chr1	106393810	106393819	three_prime_UTR;Phlpp1;protein_coding;ENSMUSG00000044340.7	13.3271	+
chr1	106393828	106393837	three_prime_UTR;Phlpp1;protein_coding;ENSMUSG00000044340.7	33.6589	+
chr1	106538243	106538252	three_prime_UTR;Bcl2;protein_coding;ENSMUSG00000057329.7	0.968461	-
chr1	106538558	106538567	three_prime_UTR;Bcl2;protein_coding;ENSMUSG00000057329.7	29.0815	-
chr1	106539879	106539888	three_prime_UTR;Bcl2;protein_coding;ENSMUSG00000057329.7	29.3801	-
chr1	106540350	106540359	three_prime_UTR;Bcl2;protein_coding;ENSMUSG00000057329.7	2.85508	-
chr1	106540840	106540849	three_prime_UTR;Bcl2;protein_coding;ENSMUSG00000057329.7	17.8058	-
chr1	106540858	106540867	three_prime_UTR;Bcl2;protein_coding;ENSMUSG00000057329.7	15.4207	-
chr1	106542439	106542448	three_prime_UTR;Bcl2;protein_coding;ENSMUSG00000057329.7	2.07061	-
chr1	106542867	106542876	three_prime_UTR;Bcl2;protein_coding;ENSMUSG00000057329.7	18.4786	-
chr1	106542894	106542903	three_prime_UTR;Bcl2;protein_coding;ENSMUSG00000057329.7	21.8195	-
chr1	106683293	106683302	intron;Bcl2;protein_coding;ENSMUSG00000057329.7	90.7914	-
chr1	106683309	106683318	intron;Bcl2;protein_coding;ENSMUSG00000057329.7	53.9113	-
chr1	106683321	106683330	intron;Bcl2;protein_coding;ENSMUSG00000057329.7	91.4052	-
chr1	106713296	106713305	five_prime_UTR;Bcl2;protein_coding;ENSMUSG00000057329.7	15.7207	-
chr1	106771204	106771213	three_prime_UTR;Vps4b;protein_coding;ENSMUSG00000009907.17	248.659	-
chr1	106771216	106771225	three_prime_UTR;Vps4b;protein_coding;ENSMUSG00000009907.17	180.676	-
chr1	106771348	106771357	three_prime_UTR;Vps4b;protein_coding;ENSMUSG00000009907.17	24.9157	-
chr1	106771467	106771476	three_prime_UTR;Vps4b;protein_coding;ENSMUSG00000009907.17	3.20679	-
chr1	106771488	106771497	three_prime_UTR;Vps4b;protein_coding;ENSMUSG00000009907.17	77.7284	-
chr1	106771537	106771546	three_prime_UTR;Vps4b;protein_coding;ENSMUSG00000009907.17	46.6221	-
chr1	106771612	106771621	three_prime_UTR;Vps4b;protein_coding;ENSMUSG00000009907.17	302.657	-
chr1	106771645	106771654	three_prime_UTR;Vps4b;protein_coding;ENSMUSG00000009907.17	13.4835	-
chr1	106771659	106771668	three_prime_UTR;Vps4b;protein_coding;ENSMUSG00000009907.17	5.1724	-
chr1	106771777	106771786	three_prime_UTR;Vps4b;protein_coding;ENSMUSG00000009907.17	37.078	-
chr1	106771998	106772007	three_prime_UTR;Vps4b;protein_coding;ENSMUSG00000009907.17	6.85347	-
chr1	106772345	106772354	three_prime_UTR;Vps4b;protein_coding;ENSMUSG00000009907.17	3.29002	-
chr1	119653331	119653340	three_prime_UTR;Ptpn4;protein_coding;ENSMUSG00000026384.13	54.4042	-
chr1	119653364	119653373	three_prime_UTR;Ptpn4;protein_coding;ENSMUSG00000026384.13	76.0817	-
chr1	119653377	119653386	three_prime_UTR;Ptpn4;protein_coding;ENSMUSG00000026384.13	4.83089	-
chr1	119653390	119653399	three_prime_UTR;Ptpn4;protein_coding;ENSMUSG00000026384.13	5.18246	-
chr1	119653428	119653437	three_prime_UTR;Ptpn4;protein_coding;ENSMUSG00000026384.13	0.83129	-
chr1	119678823	119678832	three_prime_UTR;Ptpn4;protein_coding;ENSMUSG00000026384.13	5.70616	-
chr1	119678833	119678842	three_prime_UTR;Ptpn4;protein_coding;ENSMUSG00000026384.13	13.2926	-
chr1	120113346	120113355	three_prime_UTR;Dbi;protein_coding;ENSMUSG00000026385.16	28.9136	-
chr1	120113366	120113375	three_prime_UTR;Dbi;protein_coding;ENSMUSG00000026385.16	2.78473	-
chr1	121305745	121305754	three_prime_UTR;Insig2;protein_coding;ENSMUSG00000003721.14	9.45694	-
chr1	121305779	121305788	three_prime_UTR;Insig2;protein_coding;ENSMUSG00000003721.14	107.59	-
chr1	121305798	121305807	three_prime_UTR;Insig2;protein_coding;ENSMUSG00000003721.14	33.8451	-
chr1	121305808	121305817	three_prime_UTR;Insig2;protein_coding;ENSMUSG00000003721.14	6.57599	-
chr1	121305868	121305877	three_prime_UTR;Insig2;protein_coding;ENSMUSG00000003721.14	5.45088	-
chr1	121305886	121305895	three_prime_UTR;Insig2;protein_coding;ENSMUSG00000003721.14	11.097	-
chr1	121437792	121437801	intron;Ccdc93;protein_coding;ENSMUSG00000026339.18	7.19688	+
chr1	121437802	121437811	CDS;Ccdc93;protein_coding;ENSMUSG00000026339.18	17.1598	+
chr1	121506340	121506349	three_prime_UTR;Ccdc93;protein_coding;ENSMUSG00000026339.18	6.52789	+
chr1	121506355	121506364	three_prime_UTR;Ccdc93;protein_coding;ENSMUSG00000026339.18	14.3056	+
chr1	121506367	121506376	three_prime_UTR;Ccdc93;protein_coding;ENSMUSG00000026339.18	3.35578	+
chr1	127320674	127320683	CDS;Mgat5;protein_coding;ENSMUSG00000036155.13	16.8781	+
chr1	127320747	127320756	CDS;Mgat5;protein_coding;ENSMUSG00000036155.13	61.302	+
chr1	127365143	127365152	CDS;Mgat5;protein_coding;ENSMUSG00000036155.13	56.4023	+
chr1	127365183	127365192	CDS;Mgat5;protein_coding;ENSMUSG00000036155.13	21.9685	+
chr1	127365213	127365222	CDS;Mgat5;protein_coding;ENSMUSG00000036155.13	22.5264	+
chr1	127366397	127366406	intron;Mgat5;protein_coding;ENSMUSG00000036155.13	20.4989	+
chr1	127366440	127366449	CDS;Mgat5;protein_coding;ENSMUSG00000036155.13	73.4487	+
chr1	127382924	127382933	CDS;Mgat5;protein_coding;ENSMUSG00000036155.13	40.5412	+
chr1	127803872	127803881	three_prime_UTR;Ccnt2;protein_coding;ENSMUSG00000026349.14	0.928976	+
chr1	127803956	127803965	three_prime_UTR;Ccnt2;protein_coding;ENSMUSG00000026349.14	21.7839	+
chr1	127803971	127803980	three_prime_UTR;Ccnt2;protein_coding;ENSMUSG00000026349.14	63.5925	+
chr1	127803987	127803996	three_prime_UTR;Ccnt2;protein_coding;ENSMUSG00000026349.14	4.98847	+
chr1	127804576	127804585	three_prime_UTR;Ccnt2;protein_coding;ENSMUSG00000026349.14	33.8295	+
chr1	127804608	127804617	three_prime_UTR;Ccnt2;protein_coding;ENSMUSG00000026349.14	33.658	+
chr1	127942579	127942588	CDS;Rab3gap1;protein_coding;ENSMUSG00000036104.12	12.2436	+
chr1	128237426	128237435	three_prime_UTR;R3hdm1;protein_coding;ENSMUSG00000056211.13	197.485	+
chr1	128237457	128237466	three_prime_UTR;R3hdm1;protein_coding;ENSMUSG00000056211.13	67.7236	+
chr1	128417225	128417234	five_prime_UTR;Dars;protein_coding;ENSMUSG00000026356.15	72.2364	-
chr1	128417239	128417248	five_prime_UTR;Dars;protein_coding;ENSMUSG00000026356.15	36.283	-
chr1	128417274	128417283	five_prime_UTR;Dars;protein_coding;ENSMUSG00000026356.15	20.3213	-
chr1	128417297	128417306	five_prime_UTR;Dars;protein_coding;ENSMUSG00000026356.15	27.7629	-
chr1	128417324	128417333	five_prime_UTR;Dars;protein_coding;ENSMUSG00000026356.15	93.121	-
chr1	128588256	128588265	three_prime_UTR;Cxcr4;protein_coding;ENSMUSG00000045382.6	26.1121	-
chr1	128588275	128588284	three_prime_UTR;Cxcr4;protein_coding;ENSMUSG00000045382.6	32.4572	-
chr1	128588626	128588635	three_prime_UTR;Cxcr4;protein_coding;ENSMUSG00000045382.6	23.4388	-
chr1	131177095	131177104	three_prime_UTR;Rassf5;protein_coding;ENSMUSG00000026430.16	51.2774	-
chr1	131177105	131177114	three_prime_UTR;Rassf5;protein_coding;ENSMUSG00000026430.16	8.33515	-
chr1	131177117	131177126	three_prime_UTR;Rassf5;protein_coding;ENSMUSG00000026430.16	2.82471	-
chr1	131177136	131177145	three_prime_UTR;Rassf5;protein_coding;ENSMUSG00000026430.16	14.0551	-
chr1	131846840	131846849	three_prime_UTR;Slc41a1;protein_coding;ENSMUSG00000013275.9	19.2448	+
chr1	131931232	131931241	three_prime_UTR;Nucks1;protein_coding;ENSMUSG00000026434.12	45.1631	+
chr1	131933120	131933129	three_prime_UTR;Nucks1;protein_coding;ENSMUSG00000026434.12	26.8376	+
chr1	131933292	131933301	three_prime_UTR;Nucks1;protein_coding;ENSMUSG00000026434.12	34.3411	+
chr1	131933325	131933334	three_prime_UTR;Nucks1;protein_coding;ENSMUSG00000026434.12	7.50331	+
chr1	131933495	131933504	three_prime_UTR;Nucks1;protein_coding;ENSMUSG00000026434.12	28.7273	+
chr1	131933507	131933516	three_prime_UTR;Nucks1;protein_coding;ENSMUSG00000026434.12	163.991	+
chr1	131933525	131933534	three_prime_UTR;Nucks1;protein_coding;ENSMUSG00000026434.12	86.6313	+
chr1	131933756	131933765	three_prime_UTR;Nucks1;protein_coding;ENSMUSG00000026434.12	11.5818	+
chr1	131933782	131933791	three_prime_UTR;Nucks1;protein_coding;ENSMUSG00000026434.12	37.6042	+
chr1	131934189	131934198	three_prime_UTR;Nucks1;protein_coding;ENSMUSG00000026434.12	139.85	+
chr1	131934259	131934268	three_prime_UTR;Nucks1;protein_coding;ENSMUSG00000026434.12	62.6764	+
chr1	131934396	131934405	three_prime_UTR;Nucks1;protein_coding;ENSMUSG00000026434.12	9.24308	+
chr1	131935408	131935417	three_prime_UTR;Nucks1;protein_coding;ENSMUSG00000026434.12	112.591	+
chr1	131935577	131935586	three_prime_UTR;Nucks1;protein_coding;ENSMUSG00000026434.12	43.4313	+
chr1	131935660	131935669	three_prime_UTR;Nucks1;protein_coding;ENSMUSG00000026434.12	69.5422	+
chr1	131935731	131935740	three_prime_UTR;Nucks1;protein_coding;ENSMUSG00000026434.12	1.62129	+
chr1	131935757	131935766	three_prime_UTR;Nucks1;protein_coding;ENSMUSG00000026434.12	61.6944	+
chr1	131935813	131935822	three_prime_UTR;Nucks1;protein_coding;ENSMUSG00000026434.12	85.682	+
chr1	131935883	131935892	three_prime_UTR;Nucks1;protein_coding;ENSMUSG00000026434.12	19.6787	+
chr1	131935934	131935943	three_prime_UTR;Nucks1;protein_coding;ENSMUSG00000026434.12	195.026	+
chr1	131935952	131935961	three_prime_UTR;Nucks1;protein_coding;ENSMUSG00000026434.12	306.179	+
chr1	131935984	131935993	three_prime_UTR;Nucks1;protein_coding;ENSMUSG00000026434.12	99.8532	+
chr1	131936018	131936027	three_prime_UTR;Nucks1;protein_coding;ENSMUSG00000026434.12	41.331	+
chr1	131936174	131936183	three_prime_UTR;Nucks1;protein_coding;ENSMUSG00000026434.12	37.7604	+
chr1	132029120	132029129	intron;Elk4;protein_coding;ENSMUSG00000026436.15	16.1041	+
chr1	132029524	132029533	intron;Elk4;protein_coding;ENSMUSG00000026436.15	8.53217	+
chr1	132029552	132029561	intron;Elk4;protein_coding;ENSMUSG00000026436.15	30.4735	+
chr1	132504166	132504175	three_prime_UTR;Rbbp5;protein_coding;ENSMUSG00000026439.14	3.58297	+
chr1	132504189	132504198	three_prime_UTR;Rbbp5;protein_coding;ENSMUSG00000026439.14	19.3324	+
chr1	132504199	132504208	three_prime_UTR;Rbbp5;protein_coding;ENSMUSG00000026439.14	45.3197	+
chr1	132504237	132504246	three_prime_UTR;Rbbp5;protein_coding;ENSMUSG00000026439.14	16.5027	+
chr1	132504253	132504262	three_prime_UTR;Rbbp5;protein_coding;ENSMUSG00000026439.14	15.444	+
chr1	132504290	132504299	three_prime_UTR;Rbbp5;protein_coding;ENSMUSG00000026439.14	9.10963	+
chr1	132504325	132504334	three_prime_UTR;Rbbp5;protein_coding;ENSMUSG00000026439.14	6.00515	+
chr1	132504365	132504374	three_prime_UTR;Rbbp5;protein_coding;ENSMUSG00000026439.14	25.1133	+
chr1	132504377	132504386	three_prime_UTR;Rbbp5;protein_coding;ENSMUSG00000026439.14	18.3107	+
chr1	132504494	132504503	three_prime_UTR;Rbbp5;protein_coding;ENSMUSG00000026439.14	13.6613	+
chr1	132504516	132504525	three_prime_UTR;Rbbp5;protein_coding;ENSMUSG00000026439.14	7.66973	+
chr1	132504596	132504605	three_prime_UTR;Rbbp5;protein_coding;ENSMUSG00000026439.14	2.22529	+
chr1	132504632	132504641	three_prime_UTR;Rbbp5;protein_coding;ENSMUSG00000026439.14	6.19479	+
chr1	132504741	132504750	three_prime_UTR;Rbbp5;protein_coding;ENSMUSG00000026439.14	474.047	+
chr1	132504804	132504813	three_prime_UTR;Rbbp5;protein_coding;ENSMUSG00000026439.14	57.6441	+
chr1	132504909	132504918	three_prime_UTR;Rbbp5;protein_coding;ENSMUSG00000026439.14	69.2717	+
chr1	132504924	132504933	three_prime_UTR;Rbbp5;protein_coding;ENSMUSG00000026439.14	32.9723	+
chr1	132504975	132504984	three_prime_UTR;Rbbp5;protein_coding;ENSMUSG00000026439.14	14.6053	+
chr1	132505032	132505041	three_prime_UTR;Rbbp5;protein_coding;ENSMUSG00000026439.14	59.3511	+
chr1	132505069	132505078	three_prime_UTR;Rbbp5;protein_coding;ENSMUSG00000026439.14	7.44732	+
chr1	132505087	132505096	three_prime_UTR;Rbbp5;protein_coding;ENSMUSG00000026439.14	17.4269	+
chr1	132505142	132505151	three_prime_UTR;Rbbp5;protein_coding;ENSMUSG00000026439.14	44.6229	+
chr1	132505185	132505194	three_prime_UTR;Rbbp5;protein_coding;ENSMUSG00000026439.14	1.23691	+
chr1	132505318	132505327	three_prime_UTR;Rbbp5;protein_coding;ENSMUSG00000026439.14	30.0872	+
chr1	132505376	132505385	three_prime_UTR;Rbbp5;protein_coding;ENSMUSG00000026439.14	55.2616	+
chr1	132505530	132505539	three_prime_UTR;Rbbp5;protein_coding;ENSMUSG00000026439.14	1.37404	+
chr1	132505552	132505561	three_prime_UTR;Rbbp5;protein_coding;ENSMUSG00000026439.14	34.0011	+
chr1	132505564	132505573	three_prime_UTR;Rbbp5;protein_coding;ENSMUSG00000026439.14	37.415	+
chr1	132505577	132505586	three_prime_UTR;Rbbp5;protein_coding;ENSMUSG00000026439.14	58.3746	+
chr1	132987195	132987204	three_prime_UTR;Mdm4;protein_coding;ENSMUSG00000054387.13	24.7084	-
chr1	133133065	133133074	CDS;Ppp1r15b;protein_coding;ENSMUSG00000046062.5	67.1644	+
chr1	133138987	133138996	three_prime_UTR;Ppp1r15b;protein_coding;ENSMUSG00000046062.5	1.94774	+
chr1	133139653	133139662	three_prime_UTR;Ppp1r15b;protein_coding;ENSMUSG00000046062.5	9.44017	+
chr1	133139666	133139675	three_prime_UTR;Ppp1r15b;protein_coding;ENSMUSG00000046062.5	50.8428	+
chr1	133139687	133139696	three_prime_UTR;Ppp1r15b;protein_coding;ENSMUSG00000046062.5	4.29678	+
chr1	134075445	134075454	three_prime_UTR;Btg2;protein_coding;ENSMUSG00000020423.6	3.8671	-
chr1	134075456	134075465	three_prime_UTR;Btg2;protein_coding;ENSMUSG00000020423.6	19.8109	-
chr1	134075527	134075536	three_prime_UTR;Btg2;protein_coding;ENSMUSG00000020423.6	5.4391	-
chr1	134075556	134075565	three_prime_UTR;Btg2;protein_coding;ENSMUSG00000020423.6	43.8475	-
chr1	134075597	134075606	three_prime_UTR;Btg2;protein_coding;ENSMUSG00000020423.6	67.5279	-
chr1	134075622	134075631	three_prime_UTR;Btg2;protein_coding;ENSMUSG00000020423.6	6.56514	-
chr1	134075677	134075686	three_prime_UTR;Btg2;protein_coding;ENSMUSG00000020423.6	42.1949	-
chr1	134075703	134075712	three_prime_UTR;Btg2;protein_coding;ENSMUSG00000020423.6	39.5493	-
chr1	134075780	134075789	three_prime_UTR;Btg2;protein_coding;ENSMUSG00000020423.6	19.6681	-
chr1	134075802	134075811	three_prime_UTR;Btg2;protein_coding;ENSMUSG00000020423.6	24.9466	-
chr1	134075816	134075825	three_prime_UTR;Btg2;protein_coding;ENSMUSG00000020423.6	7.92193	-
chr1	134075875	134075884	three_prime_UTR;Btg2;protein_coding;ENSMUSG00000020423.6	33.4156	-
chr1	134075973	134075982	three_prime_UTR;Btg2;protein_coding;ENSMUSG00000020423.6	22.1448	-
chr1	134075984	134075993	three_prime_UTR;Btg2;protein_coding;ENSMUSG00000020423.6	13.852	-
chr1	134076101	134076110	three_prime_UTR;Btg2;protein_coding;ENSMUSG00000020423.6	4.06388	-
chr1	134076123	134076132	three_prime_UTR;Btg2;protein_coding;ENSMUSG00000020423.6	2.52053	-
chr1	134076352	134076361	three_prime_UTR;Btg2;protein_coding;ENSMUSG00000020423.6	2.19527	-
chr1	134076383	134076392	three_prime_UTR;Btg2;protein_coding;ENSMUSG00000020423.6	7.9146	-
chr1	134076393	134076402	three_prime_UTR;Btg2;protein_coding;ENSMUSG00000020423.6	72.1035	-
chr1	134076496	134076505	three_prime_UTR;Btg2;protein_coding;ENSMUSG00000020423.6	19.2222	-
chr1	134076675	134076684	three_prime_UTR;Btg2;protein_coding;ENSMUSG00000020423.6	18.3372	-
chr1	134076696	134076705	three_prime_UTR;Btg2;protein_coding;ENSMUSG00000020423.6	22.3769	-
chr1	134076747	134076756	three_prime_UTR;Btg2;protein_coding;ENSMUSG00000020423.6	5.05156	-
chr1	134076856	134076865	three_prime_UTR;Btg2;protein_coding;ENSMUSG00000020423.6	172.83	-
chr1	134076965	134076974	three_prime_UTR;Btg2;protein_coding;ENSMUSG00000020423.6	27.4968	-
chr1	134431881	134431890	three_prime_UTR;Adipor1;protein_coding;ENSMUSG00000026457.14	14.7978	+
chr1	134490491	134490500	three_prime_UTR;Klhl12;protein_coding;ENSMUSG00000026455.14	30.6622	+
chr1	134974017	134974026	three_prime_UTR;Ube2t;protein_coding;ENSMUSG00000026429.9	62.3326	+
chr1	134974073	134974082	three_prime_UTR;Ube2t;protein_coding;ENSMUSG00000026429.9	7.47779	+
chr1	134974083	134974092	three_prime_UTR;Ube2t;protein_coding;ENSMUSG00000026429.9	2.68439	+
chr1	135145032	135145041	three_prime_UTR;Ptpn7;protein_coding;ENSMUSG00000031506.11	32.7042	+
chr1	135145106	135145115	three_prime_UTR;Ptpn7;protein_coding;ENSMUSG00000031506.11	1.06917	+
chr1	135145192	135145201	three_prime_UTR;Ptpn7;protein_coding;ENSMUSG00000031506.11	98.1729	+
chr1	135385045	135385054	three_prime_UTR;Ipo9;protein_coding;ENSMUSG00000041879.13	29.9383	-
chr1	135385069	135385078	three_prime_UTR;Ipo9;protein_coding;ENSMUSG00000041879.13	13.7884	-
chr1	136171626	136171635	CDS;Kif21b;protein_coding;ENSMUSG00000041642.18	9.44178	+
chr1	136175147	136175156	three_prime_UTR;Kif21b;protein_coding;ENSMUSG00000041642.18	11.0183	+
chr1	136175176	136175185	three_prime_UTR;Kif21b;protein_coding;ENSMUSG00000041642.18	7.42116	+
chr1	138063467	138063476	three_prime_UTR;Ptprc;protein_coding;ENSMUSG00000026395.16	5.22841	-
chr1	138063484	138063493	three_prime_UTR;Ptprc;protein_coding;ENSMUSG00000026395.16	58.3867	-
chr1	138063612	138063621	three_prime_UTR;Ptprc;protein_coding;ENSMUSG00000026395.16	11.2558	-
chr1	138063744	138063753	three_prime_UTR;Ptprc;protein_coding;ENSMUSG00000026395.16	59.6524	-
chr1	138063805	138063814	three_prime_UTR;Ptprc;protein_coding;ENSMUSG00000026395.16	77.1775	-
chr1	138063967	138063976	three_prime_UTR;Ptprc;protein_coding;ENSMUSG00000026395.16	12.0969	-
chr1	138063983	138063992	three_prime_UTR;Ptprc;protein_coding;ENSMUSG00000026395.16	258.426	-
chr1	138064005	138064014	three_prime_UTR;Ptprc;protein_coding;ENSMUSG00000026395.16	77.1773	-
chr1	138064088	138064097	three_prime_UTR;Ptprc;protein_coding;ENSMUSG00000026395.16	226.939	-
chr1	138064108	138064117	three_prime_UTR;Ptprc;protein_coding;ENSMUSG00000026395.16	132.677	-
chr1	138064118	138064127	three_prime_UTR;Ptprc;protein_coding;ENSMUSG00000026395.16	469.938	-
chr1	138064133	138064142	three_prime_UTR;Ptprc;protein_coding;ENSMUSG00000026395.16	14.9187	-
chr1	138064206	138064215	three_prime_UTR;Ptprc;protein_coding;ENSMUSG00000026395.16	286.297	-
chr1	138064217	138064226	three_prime_UTR;Ptprc;protein_coding;ENSMUSG00000026395.16	474.246	-
chr1	138064233	138064242	three_prime_UTR;Ptprc;protein_coding;ENSMUSG00000026395.16	393.666	-
chr1	138064249	138064258	three_prime_UTR;Ptprc;protein_coding;ENSMUSG00000026395.16	66.8083	-
chr1	138064344	138064353	three_prime_UTR;Ptprc;protein_coding;ENSMUSG00000026395.16	29.282	-
chr1	138064392	138064401	three_prime_UTR;Ptprc;protein_coding;ENSMUSG00000026395.16	4.77649	-
chr1	138064491	138064500	three_prime_UTR;Ptprc;protein_coding;ENSMUSG00000026395.16	15.965	-
chr1	138064505	138064514	stop_codon;Ptprc;protein_coding;ENSMUSG00000026395.16	13.4531	-
chr1	138064619	138064628	CDS;Ptprc;protein_coding;ENSMUSG00000026395.16	0.971463	-
chr1	138064643	138064652	CDS;Ptprc;protein_coding;ENSMUSG00000026395.16	5.25979	-
chr1	138064674	138064683	CDS;Ptprc;protein_coding;ENSMUSG00000026395.16	35.4874	-
chr1	138066097	138066106	CDS;Ptprc;protein_coding;ENSMUSG00000026395.16	7.29666	-
chr1	138066123	138066132	CDS;Ptprc;protein_coding;ENSMUSG00000026395.16	18.0544	-
chr1	138071142	138071151	CDS;Ptprc;protein_coding;ENSMUSG00000026395.16	7.0001	-
chr1	138072353	138072362	CDS;Ptprc;protein_coding;ENSMUSG00000026395.16	35.1822	-
chr1	138072379	138072388	CDS;Ptprc;protein_coding;ENSMUSG00000026395.16	6.63551	-
chr1	138078581	138078590	CDS;Ptprc;protein_coding;ENSMUSG00000026395.16	7.6331	-
chr1	138080151	138080160	CDS;Ptprc;protein_coding;ENSMUSG00000026395.16	5.05789	-
chr1	138080166	138080175	CDS;Ptprc;protein_coding;ENSMUSG00000026395.16	14.8636	-
chr1	138083590	138083599	CDS;Ptprc;protein_coding;ENSMUSG00000026395.16	19.3107	-
chr1	138088568	138088577	CDS;Ptprc;protein_coding;ENSMUSG00000026395.16	20.9838	-
chr1	138094276	138094285	CDS;Ptprc;protein_coding;ENSMUSG00000026395.16	2.41113	-
chr1	138095599	138095608	intron;Ptprc;protein_coding;ENSMUSG00000026395.16	9.27592	-
chr1	138096625	138096634	intron;Ptprc;protein_coding;ENSMUSG00000026395.16	3.86246	-
chr1	138097759	138097768	intron;Ptprc;protein_coding;ENSMUSG00000026395.16	0.144092	-
chr1	138098404	138098413	intron;Ptprc;protein_coding;ENSMUSG00000026395.16	1.37507	-
chr1	138098478	138098487	intron;Ptprc;protein_coding;ENSMUSG00000026395.16	2.34454	-
chr1	138098549	138098558	intron;Ptprc;protein_coding;ENSMUSG00000026395.16	24.0245	-
chr1	138099588	138099597	CDS;Ptprc;protein_coding;ENSMUSG00000026395.16	28.892	-
chr1	138101134	138101143	CDS;Ptprc;protein_coding;ENSMUSG00000026395.16	15.4862	-
chr1	138107812	138107821	CDS;Ptprc;protein_coding;ENSMUSG00000026395.16	3.21473	-
chr1	138107855	138107864	CDS;Ptprc;protein_coding;ENSMUSG00000026395.16	19.3922	-
chr1	138111174	138111183	CDS;Ptprc;protein_coding;ENSMUSG00000026395.16	2.4933	-
chr1	138111272	138111281	CDS;Ptprc;protein_coding;ENSMUSG00000026395.16	7.846	-
chr1	138112244	138112253	CDS;Ptprc;protein_coding;ENSMUSG00000026395.16	18.1973	-
chr1	138112268	138112277	CDS;Ptprc;protein_coding;ENSMUSG00000026395.16	14.7647	-
chr1	138112281	138112290	CDS;Ptprc;protein_coding;ENSMUSG00000026395.16	18.8442	-
chr1	138113343	138113352	exon;Ptprc;protein_coding;ENSMUSG00000026395.16	10.3617	-
chr1	138113574	138113583	CDS;Ptprc;protein_coding;ENSMUSG00000026395.16	44.7065	-
chr1	138113719	138113728	CDS;Ptprc;protein_coding;ENSMUSG00000026395.16	38.7633	-
chr1	138113745	138113754	CDS;Ptprc;protein_coding;ENSMUSG00000026395.16	18.7843	-
chr1	138115026	138115035	exon;Ptprc;protein_coding;ENSMUSG00000026395.16	11.1661	-
chr1	138115097	138115106	exon;Ptprc;protein_coding;ENSMUSG00000026395.16	0.980777	-
chr1	138115129	138115138	exon;Ptprc;protein_coding;ENSMUSG00000026395.16	1.45034	-
chr1	138115190	138115199	exon;Ptprc;protein_coding;ENSMUSG00000026395.16	19.9103	-
chr1	138115332	138115341	exon;Ptprc;protein_coding;ENSMUSG00000026395.16	13.5419	-
chr1	138115419	138115428	exon;Ptprc;protein_coding;ENSMUSG00000026395.16	4.66503	-
chr1	138115473	138115482	exon;Ptprc;protein_coding;ENSMUSG00000026395.16	11.3171	-
chr1	138115530	138115539	intron;Ptprc;protein_coding;ENSMUSG00000026395.16	42.8895	-
chr1	138115635	138115644	CDS;Ptprc;protein_coding;ENSMUSG00000026395.16	3.51076	-
chr1	138115851	138115860	exon;Ptprc;protein_coding;ENSMUSG00000026395.16	6.63716	-
chr1	138115949	138115958	exon;Ptprc;protein_coding;ENSMUSG00000026395.16	15.857	-
chr1	138115966	138115975	exon;Ptprc;protein_coding;ENSMUSG00000026395.16	3.06811	-
chr1	138116015	138116024	exon;Ptprc;protein_coding;ENSMUSG00000026395.16	3.60488	-
chr1	138116030	138116039	exon;Ptprc;protein_coding;ENSMUSG00000026395.16	3.68146	-
chr1	138116245	138116254	exon;Ptprc;protein_coding;ENSMUSG00000026395.16	4.57445	-
chr1	138116264	138116273	exon;Ptprc;protein_coding;ENSMUSG00000026395.16	3.50296	-
chr1	138116287	138116296	exon;Ptprc;protein_coding;ENSMUSG00000026395.16	17.6582	-
chr1	138116402	138116411	exon;Ptprc;protein_coding;ENSMUSG00000026395.16	23.1839	-
chr1	138116600	138116609	intron;Ptprc;protein_coding;ENSMUSG00000026395.16	11.8138	-
chr1	138116683	138116692	intron;Ptprc;protein_coding;ENSMUSG00000026395.16	8.49015	-
chr1	138116728	138116737	intron;Ptprc;protein_coding;ENSMUSG00000026395.16	1.57269	-
chr1	138116854	138116863	intron;Ptprc;protein_coding;ENSMUSG00000026395.16	19.6085	-
chr1	138116873	138116882	intron;Ptprc;protein_coding;ENSMUSG00000026395.16	4.03292	-
chr1	138116891	138116900	intron;Ptprc;protein_coding;ENSMUSG00000026395.16	3.6427	-
chr1	138116909	138116918	intron;Ptprc;protein_coding;ENSMUSG00000026395.16	1.03679	-
chr1	138116949	138116958	intron;Ptprc;protein_coding;ENSMUSG00000026395.16	10.6869	-
chr1	138117257	138117266	intron;Ptprc;protein_coding;ENSMUSG00000026395.16	36.4301	-
chr1	138117280	138117289	intron;Ptprc;protein_coding;ENSMUSG00000026395.16	4.56194	-
chr1	138117816	138117825	CDS;Ptprc;protein_coding;ENSMUSG00000026395.16	28.2166	-
chr1	138117895	138117904	exon;Ptprc;protein_coding;ENSMUSG00000026395.16	35.9846	-
chr1	138117911	138117920	exon;Ptprc;protein_coding;ENSMUSG00000026395.16	1.34924	-
chr1	138118320	138118329	exon;Ptprc;protein_coding;ENSMUSG00000026395.16	14.8189	-
chr1	138118465	138118474	exon;Ptprc;protein_coding;ENSMUSG00000026395.16	58.1133	-
chr1	138118487	138118496	exon;Ptprc;protein_coding;ENSMUSG00000026395.16	8.31414	-
chr1	138118745	138118754	exon;Ptprc;protein_coding;ENSMUSG00000026395.16	9.50003	-
chr1	138118787	138118796	exon;Ptprc;protein_coding;ENSMUSG00000026395.16	47.8006	-
chr1	138118806	138118815	exon;Ptprc;protein_coding;ENSMUSG00000026395.16	21.7131	-
chr1	138119082	138119091	exon;Ptprc;protein_coding;ENSMUSG00000026395.16	5.46699	-
chr1	138119156	138119165	exon;Ptprc;protein_coding;ENSMUSG00000026395.16	13.4736	-
chr1	138119173	138119182	exon;Ptprc;protein_coding;ENSMUSG00000026395.16	29.3981	-
chr1	138119563	138119572	exon;Ptprc;protein_coding;ENSMUSG00000026395.16	32.7043	-
chr1	138119646	138119655	exon;Ptprc;protein_coding;ENSMUSG00000026395.16	3.47819	-
chr1	138120157	138120166	CDS;Ptprc;protein_coding;ENSMUSG00000026395.16	5.24653	-
chr1	138120173	138120182	exon;Ptprc;protein_coding;ENSMUSG00000026395.16	7.67423	-
chr1	138120351	138120360	exon;Ptprc;protein_coding;ENSMUSG00000026395.16	46.0651	-
chr1	138120423	138120432	exon;Ptprc;protein_coding;ENSMUSG00000026395.16	9.84861	-
chr1	138120438	138120447	exon;Ptprc;protein_coding;ENSMUSG00000026395.16	73.6081	-
chr1	138120987	138120996	intron;Ptprc;protein_coding;ENSMUSG00000026395.16	45.5385	-
chr1	138121531	138121540	intron;Ptprc;protein_coding;ENSMUSG00000026395.16	14.5858	-
chr1	138121628	138121637	intron;Ptprc;protein_coding;ENSMUSG00000026395.16	10.1578	-
chr1	138121997	138122006	intron;Ptprc;protein_coding;ENSMUSG00000026395.16	42.7167	-
chr1	138123702	138123711	intron;Ptprc;protein_coding;ENSMUSG00000026395.16	117.96	-
chr1	138124171	138124180	exon;Ptprc;protein_coding;ENSMUSG00000026395.16	48.9871	-
chr1	138124335	138124344	exon;Ptprc;protein_coding;ENSMUSG00000026395.16	11.2224	-
chr1	138124434	138124443	exon;Ptprc;protein_coding;ENSMUSG00000026395.16	341.582	-
chr1	138124482	138124491	exon;Ptprc;protein_coding;ENSMUSG00000026395.16	83.9527	-
chr1	138124653	138124662	exon;Ptprc;protein_coding;ENSMUSG00000026395.16	50.3059	-
chr1	138124668	138124677	exon;Ptprc;protein_coding;ENSMUSG00000026395.16	27.6033	-
chr1	138124691	138124700	exon;Ptprc;protein_coding;ENSMUSG00000026395.16	131.964	-
chr1	138124865	138124874	exon;Ptprc;protein_coding;ENSMUSG00000026395.16	205.098	-
chr1	138125368	138125377	exon;Ptprc;protein_coding;ENSMUSG00000026395.16	25.9336	-
chr1	138125724	138125733	exon;Ptprc;protein_coding;ENSMUSG00000026395.16	45.1083	-
chr1	138125880	138125889	exon;Ptprc;protein_coding;ENSMUSG00000026395.16	6.15863	-
chr1	138126227	138126236	exon;Ptprc;protein_coding;ENSMUSG00000026395.16	6.97286	-
chr1	138175107	138175116	five_prime_UTR;Ptprc;protein_coding;ENSMUSG00000026395.16	75.4376	-
chr1	138486748	138486757	three_prime_UTR;Nek7;protein_coding;ENSMUSG00000026393.10	5.84916	-
chr1	138486919	138486928	three_prime_UTR;Nek7;protein_coding;ENSMUSG00000026393.10	25.7482	-
chr1	139171271	139171280	three_prime_UTR;Dennd1b;protein_coding;ENSMUSG00000056268.15	14.9841	+
chr1	139171317	139171326	three_prime_UTR;Dennd1b;protein_coding;ENSMUSG00000056268.15	14.5453	+
chr1	139171335	139171344	three_prime_UTR;Dennd1b;protein_coding;ENSMUSG00000056268.15	18.0433	+
chr1	139174640	139174649	three_prime_UTR;Dennd1b;protein_coding;ENSMUSG00000056268.15	55.3121	+
chr1	139174670	139174679	three_prime_UTR;Dennd1b;protein_coding;ENSMUSG00000056268.15	10.8768	+
chr1	139437434	139437443	intron;Zbtb41;protein_coding;ENSMUSG00000033964.12	33.7993	+
chr1	139437451	139437460	three_prime_UTR;Zbtb41;protein_coding;ENSMUSG00000033964.12	2.14363	+
chr1	139437461	139437470	three_prime_UTR;Zbtb41;protein_coding;ENSMUSG00000033964.12	11.57	+
chr1	139437503	139437512	three_prime_UTR;Zbtb41;protein_coding;ENSMUSG00000033964.12	5.13826	+
chr1	139468629	139468638	CDS;Aspm;protein_coding;ENSMUSG00000033952.14	9.52371	+
chr1	139490078	139490087	CDS;Aspm;protein_coding;ENSMUSG00000033952.14	48.4088	+
chr1	139490301	139490310	CDS;Aspm;protein_coding;ENSMUSG00000033952.14	34.6991	+
chr1	139493960	139493969	three_prime_UTR;Aspm;protein_coding;ENSMUSG00000033952.14	36.4109	+
chr1	143605341	143605350	three_prime_UTR;Cdc73;protein_coding;ENSMUSG00000026361.9	4.26084	-
chr1	143605370	143605379	three_prime_UTR;Cdc73;protein_coding;ENSMUSG00000026361.9	2.38332	-
chr1	143605396	143605405	three_prime_UTR;Cdc73;protein_coding;ENSMUSG00000026361.9	3.60971	-
chr1	143605457	143605466	three_prime_UTR;Cdc73;protein_coding;ENSMUSG00000026361.9	24.0545	-
chr1	143605495	143605504	three_prime_UTR;Cdc73;protein_coding;ENSMUSG00000026361.9	5.14339	-
chr1	143605560	143605569	three_prime_UTR;Cdc73;protein_coding;ENSMUSG00000026361.9	4.18936	-
chr1	143605601	143605610	three_prime_UTR;Cdc73;protein_coding;ENSMUSG00000026361.9	5.66211	-
chr1	143605612	143605621	three_prime_UTR;Cdc73;protein_coding;ENSMUSG00000026361.9	39.953	-
chr1	143607709	143607718	three_prime_UTR;Cdc73;protein_coding;ENSMUSG00000026361.9	12.6405	-
chr1	143607734	143607743	three_prime_UTR;Cdc73;protein_coding;ENSMUSG00000026361.9	11.1673	-
chr1	143607747	143607756	three_prime_UTR;Cdc73;protein_coding;ENSMUSG00000026361.9	24.396	-
chr1	143608297	143608306	three_prime_UTR;Cdc73;protein_coding;ENSMUSG00000026361.9	6.6638	-
chr1	150449823	150449832	three_prime_UTR;Tpr;protein_coding;ENSMUSG00000006005.18	13.0774	+
chr1	150449837	150449846	three_prime_UTR;Tpr;protein_coding;ENSMUSG00000006005.18	36.9772	+
chr1	150449848	150449857	three_prime_UTR;Tpr;protein_coding;ENSMUSG00000006005.18	91.3449	+
chr1	151349454	151349463	five_prime_UTR;Ivns1abp;protein_coding;ENSMUSG00000023150.14	6.16479	+
chr1	151363364	151363373	three_prime_UTR;Ivns1abp;protein_coding;ENSMUSG00000023150.14	49.718	+
chr1	151363446	151363455	three_prime_UTR;Ivns1abp;protein_coding;ENSMUSG00000023150.14	0.927435	+
chr1	151363493	151363502	three_prime_UTR;Ivns1abp;protein_coding;ENSMUSG00000023150.14	7.13146	+
chr1	151470659	151470668	three_prime_UTR;Rnf2;protein_coding;ENSMUSG00000026484.13	18.1083	-
chr1	151470674	151470683	three_prime_UTR;Rnf2;protein_coding;ENSMUSG00000026484.13	5.61334	-
chr1	151470728	151470737	three_prime_UTR;Rnf2;protein_coding;ENSMUSG00000026484.13	20.8153	-
chr1	151821573	151821582	three_prime_UTR;Edem3;protein_coding;ENSMUSG00000043019.12	3.49998	+
chr1	151821652	151821661	three_prime_UTR;Edem3;protein_coding;ENSMUSG00000043019.12	2.06395	+
chr1	151821691	151821700	three_prime_UTR;Edem3;protein_coding;ENSMUSG00000043019.12	24.2616	+
chr1	151821721	151821730	three_prime_UTR;Edem3;protein_coding;ENSMUSG00000043019.12	4.57445	+
chr1	151821795	151821804	three_prime_UTR;Edem3;protein_coding;ENSMUSG00000043019.12	23.3019	+
chr1	151821840	151821849	three_prime_UTR;Edem3;protein_coding;ENSMUSG00000043019.12	0.831297	+
chr1	151821879	151821888	three_prime_UTR;Edem3;protein_coding;ENSMUSG00000043019.12	9.76322	+
chr1	151821928	151821937	three_prime_UTR;Edem3;protein_coding;ENSMUSG00000043019.12	9.45257	+
chr1	151821944	151821953	three_prime_UTR;Edem3;protein_coding;ENSMUSG00000043019.12	10.1979	+
chr1	152771415	152771424	CDS;Arpc5;protein_coding;ENSMUSG00000008475.13	13.4227	+
chr1	152771494	152771503	CDS;Arpc5;protein_coding;ENSMUSG00000008475.13	17.9023	+
chr1	152774271	152774280	CDS;Arpc5;protein_coding;ENSMUSG00000008475.13	0.993969	+
chr1	152774282	152774291	CDS;Arpc5;protein_coding;ENSMUSG00000008475.13	1.65471	+
chr1	152774294	152774303	CDS;Arpc5;protein_coding;ENSMUSG00000008475.13	11.4889	+
chr1	152774307	152774316	CDS;Arpc5;protein_coding;ENSMUSG00000008475.13	24.6403	+
chr1	152774342	152774351	three_prime_UTR;Arpc5;protein_coding;ENSMUSG00000008475.13	19.6871	+
chr1	152774362	152774371	three_prime_UTR;Arpc5;protein_coding;ENSMUSG00000008475.13	29.334	+
chr1	152774383	152774392	three_prime_UTR;Arpc5;protein_coding;ENSMUSG00000008475.13	72.9004	+
chr1	152774397	152774406	three_prime_UTR;Arpc5;protein_coding;ENSMUSG00000008475.13	13.7451	+
chr1	152774408	152774417	three_prime_UTR;Arpc5;protein_coding;ENSMUSG00000008475.13	15.0622	+
chr1	152774578	152774587	three_prime_UTR;Arpc5;protein_coding;ENSMUSG00000008475.13	2.55599	+
chr1	152774606	152774615	three_prime_UTR;Arpc5;protein_coding;ENSMUSG00000008475.13	71.4924	+
chr1	152774794	152774803	three_prime_UTR;Arpc5;protein_coding;ENSMUSG00000008475.13	14.3333	+
chr1	152774804	152774813	three_prime_UTR;Arpc5;protein_coding;ENSMUSG00000008475.13	10.5083	+
chr1	152774830	152774839	three_prime_UTR;Arpc5;protein_coding;ENSMUSG00000008475.13	9.5916	+
chr1	152774894	152774903	three_prime_UTR;Arpc5;protein_coding;ENSMUSG00000008475.13	2.45621	+
chr1	152775137	152775146	three_prime_UTR;Arpc5;protein_coding;ENSMUSG00000008475.13	3.49655	+
chr1	153455877	153455886	three_prime_UTR;Dhx9;protein_coding;ENSMUSG00000042699.11	7.92953	-
chr1	153455895	153455904	three_prime_UTR;Dhx9;protein_coding;ENSMUSG00000042699.11	11.309	-
chr1	153455909	153455918	three_prime_UTR;Dhx9;protein_coding;ENSMUSG00000042699.11	4.96913	-
chr1	155097596	155097605	three_prime_UTR;Ier5;protein_coding;ENSMUSG00000056708.5	273.347	-
chr1	155097608	155097617	three_prime_UTR;Ier5;protein_coding;ENSMUSG00000056708.5	27.4094	-
chr1	155097637	155097646	three_prime_UTR;Ier5;protein_coding;ENSMUSG00000056708.5	83.0537	-
chr1	155097657	155097666	three_prime_UTR;Ier5;protein_coding;ENSMUSG00000056708.5	84.8345	-
chr1	155097668	155097677	three_prime_UTR;Ier5;protein_coding;ENSMUSG00000056708.5	71.0329	-
chr1	155097682	155097691	three_prime_UTR;Ier5;protein_coding;ENSMUSG00000056708.5	141.379	-
chr1	155097704	155097713	three_prime_UTR;Ier5;protein_coding;ENSMUSG00000056708.5	13.8438	-
chr1	155097741	155097750	three_prime_UTR;Ier5;protein_coding;ENSMUSG00000056708.5	31.3767	-
chr1	155097869	155097878	three_prime_UTR;Ier5;protein_coding;ENSMUSG00000056708.5	14.7678	-
chr1	155097981	155097990	three_prime_UTR;Ier5;protein_coding;ENSMUSG00000056708.5	106.711	-
chr1	155098058	155098067	three_prime_UTR;Ier5;protein_coding;ENSMUSG00000056708.5	38.109	-
chr1	155098078	155098087	three_prime_UTR;Ier5;protein_coding;ENSMUSG00000056708.5	12.7612	-
chr1	155098123	155098132	three_prime_UTR;Ier5;protein_coding;ENSMUSG00000056708.5	10.0933	-
chr1	155098245	155098254	three_prime_UTR;Ier5;protein_coding;ENSMUSG00000056708.5	217.25	-
chr1	155098259	155098268	three_prime_UTR;Ier5;protein_coding;ENSMUSG00000056708.5	28.015	-
chr1	155280880	155280889	three_prime_UTR;Xpr1;protein_coding;ENSMUSG00000026469.14	21.3849	-
chr1	155922337	155922346	CDS;Cep350;protein_coding;ENSMUSG00000033671.18	35.3394	-
chr1	155953254	155953263	CDS;Cep350;protein_coding;ENSMUSG00000033671.18	3.67628	-
chr1	155953268	155953277	CDS;Cep350;protein_coding;ENSMUSG00000033671.18	19.5826	-
chr1	156022330	156022339	CDS;Tor1aip1;protein_coding;ENSMUSG00000026466.16	9.83492	-
chr1	156068676	156068685	three_prime_UTR;Tor1aip2;protein_coding;ENSMUSG00000050565.16	2.2067	+
chr1	156068696	156068705	three_prime_UTR;Tor1aip2;protein_coding;ENSMUSG00000050565.16	5.49395	+
chr1	156068744	156068753	three_prime_UTR;Tor1aip2;protein_coding;ENSMUSG00000050565.16	21.1772	+
chr1	156068762	156068771	three_prime_UTR;Tor1aip2;protein_coding;ENSMUSG00000050565.16	11.1842	+
chr1	156429941	156429950	three_prime_UTR;Soat1;protein_coding;ENSMUSG00000026600.12	17.1369	-
chr1	156641607	156641616	CDS;Abl2;protein_coding;ENSMUSG00000026596.13	18.8346	+
chr1	160076954	160076963	three_prime_UTR;4930523C07Rik;protein_coding;ENSMUSG00000090394.8	17.4506	+
chr1	160076976	160076985	three_prime_UTR;4930523C07Rik;protein_coding;ENSMUSG00000090394.8	10.1371	+
chr1	160077001	160077010	three_prime_UTR;4930523C07Rik;protein_coding;ENSMUSG00000090394.8	5.42614	+
chr1	160196960	160196969	CDS;Mrps14;protein_coding;ENSMUSG00000058267.13	7.43151	+
chr1	160196976	160196985	CDS;Mrps14;protein_coding;ENSMUSG00000058267.13	18.2117	+
chr1	160197002	160197011	CDS;Mrps14;protein_coding;ENSMUSG00000058267.13	7.74822	+
chr1	160199639	160199648	three_prime_UTR;Mrps14;protein_coding;ENSMUSG00000058267.13	17.3104	+
chr1	160199654	160199663	three_prime_UTR;Mrps14;protein_coding;ENSMUSG00000058267.13	20.8253	+
chr1	160199748	160199757	three_prime_UTR;Mrps14;protein_coding;ENSMUSG00000058267.13	8.03845	+
chr1	160199771	160199780	three_prime_UTR;Mrps14;protein_coding;ENSMUSG00000058267.13	92.518	+
chr1	160199886	160199895	three_prime_UTR;Mrps14;protein_coding;ENSMUSG00000058267.13	8.95289	+
chr1	160199907	160199916	three_prime_UTR;Mrps14;protein_coding;ENSMUSG00000058267.13	6.13616	+
chr1	160199920	160199929	three_prime_UTR;Mrps14;protein_coding;ENSMUSG00000058267.13	2.38659	+
chr1	160906593	160906602	five_prime_UTR;Rc3h1;protein_coding;ENSMUSG00000040423.11	6.49746	+
chr1	160906624	160906633	five_prime_UTR;Rc3h1;protein_coding;ENSMUSG00000040423.11	6.73286	+
chr1	160906645	160906654	five_prime_UTR;Rc3h1;protein_coding;ENSMUSG00000040423.11	35.7387	+
chr1	160906669	160906678	five_prime_UTR;Rc3h1;protein_coding;ENSMUSG00000040423.11	221.648	+
chr1	160906686	160906695	five_prime_UTR;Rc3h1;protein_coding;ENSMUSG00000040423.11	49.1686	+
chr1	160929988	160929997	five_prime_UTR;Rc3h1;protein_coding;ENSMUSG00000040423.11	1.79209	+
chr1	160929998	160930007	five_prime_UTR;Rc3h1;protein_coding;ENSMUSG00000040423.11	117.051	+
chr1	160930016	160930025	five_prime_UTR;Rc3h1;protein_coding;ENSMUSG00000040423.11	4.93975	+
chr1	160930030	160930039	five_prime_UTR;Rc3h1;protein_coding;ENSMUSG00000040423.11	362.937	+
chr1	160930075	160930084	five_prime_UTR;Rc3h1;protein_coding;ENSMUSG00000040423.11	56.4178	+
chr1	160930139	160930148	CDS;Rc3h1;protein_coding;ENSMUSG00000040423.11	16.8295	+
chr1	160930261	160930270	CDS;Rc3h1;protein_coding;ENSMUSG00000040423.11	9.28187	+
chr1	160930278	160930287	CDS;Rc3h1;protein_coding;ENSMUSG00000040423.11	14.403	+
chr1	160930303	160930312	CDS;Rc3h1;protein_coding;ENSMUSG00000040423.11	14.8671	+
chr1	160938109	160938118	intron;Rc3h1;protein_coding;ENSMUSG00000040423.11	29.6652	+
chr1	160938161	160938170	CDS;Rc3h1;protein_coding;ENSMUSG00000040423.11	19.7846	+
chr1	160938178	160938187	CDS;Rc3h1;protein_coding;ENSMUSG00000040423.11	8.38917	+
chr1	160938189	160938198	CDS;Rc3h1;protein_coding;ENSMUSG00000040423.11	5.07633	+
chr1	160940217	160940226	CDS;Rc3h1;protein_coding;ENSMUSG00000040423.11	12.8318	+
chr1	160940818	160940827	CDS;Rc3h1;protein_coding;ENSMUSG00000040423.11	9.66481	+
chr1	160940853	160940862	CDS;Rc3h1;protein_coding;ENSMUSG00000040423.11	2.71839	+
chr1	160940891	160940900	CDS;Rc3h1;protein_coding;ENSMUSG00000040423.11	1.6746	+
chr1	160940940	160940949	CDS;Rc3h1;protein_coding;ENSMUSG00000040423.11	47.4105	+
chr1	160940969	160940978	CDS;Rc3h1;protein_coding;ENSMUSG00000040423.11	2.31167	+
chr1	160942570	160942579	three_prime_UTR;Rc3h1;protein_coding;ENSMUSG00000040423.11	56.7394	+
chr1	160942580	160942589	three_prime_UTR;Rc3h1;protein_coding;ENSMUSG00000040423.11	40.7844	+
chr1	160942717	160942726	three_prime_UTR;Rc3h1;protein_coding;ENSMUSG00000040423.11	59.8215	+
chr1	160946545	160946554	three_prime_UTR;Rc3h1;protein_coding;ENSMUSG00000040423.11	10.685	+
chr1	160946561	160946570	three_prime_UTR;Rc3h1;protein_coding;ENSMUSG00000040423.11	6.69913	+
chr1	160946574	160946583	three_prime_UTR;Rc3h1;protein_coding;ENSMUSG00000040423.11	38.9839	+
chr1	160946605	160946614	three_prime_UTR;Rc3h1;protein_coding;ENSMUSG00000040423.11	9.93564	+
chr1	160946646	160946655	three_prime_UTR;Rc3h1;protein_coding;ENSMUSG00000040423.11	31.7842	+
chr1	160948312	160948321	three_prime_UTR;Rc3h1;protein_coding;ENSMUSG00000040423.11	10.6091	+
chr1	160948334	160948343	three_prime_UTR;Rc3h1;protein_coding;ENSMUSG00000040423.11	19.0974	+
chr1	160950235	160950244	three_prime_UTR;Rc3h1;protein_coding;ENSMUSG00000040423.11	20.3811	+
chr1	160950245	160950254	three_prime_UTR;Rc3h1;protein_coding;ENSMUSG00000040423.11	8.82811	+
chr1	160950884	160950893	three_prime_UTR;Rc3h1;protein_coding;ENSMUSG00000040423.11	3.86249	+
chr1	160950900	160950909	three_prime_UTR;Rc3h1;protein_coding;ENSMUSG00000040423.11	57.7981	+
chr1	160950915	160950924	three_prime_UTR;Rc3h1;protein_coding;ENSMUSG00000040423.11	1.11442	+
chr1	160950934	160950943	three_prime_UTR;Rc3h1;protein_coding;ENSMUSG00000040423.11	3.74258	+
chr1	160951016	160951025	three_prime_UTR;Rc3h1;protein_coding;ENSMUSG00000040423.11	34.45	+
chr1	160951634	160951643	three_prime_UTR;Rc3h1;protein_coding;ENSMUSG00000040423.11	22.0508	+
chr1	160951745	160951754	three_prime_UTR;Rc3h1;protein_coding;ENSMUSG00000040423.11	6.28206	+
chr1	160951800	160951809	three_prime_UTR;Rc3h1;protein_coding;ENSMUSG00000040423.11	38.5347	+
chr1	160954817	160954826	three_prime_UTR;Rc3h1;protein_coding;ENSMUSG00000040423.11	12.4893	+
chr1	160954925	160954934	three_prime_UTR;Rc3h1;protein_coding;ENSMUSG00000040423.11	8.27186	+
chr1	160954935	160954944	three_prime_UTR;Rc3h1;protein_coding;ENSMUSG00000040423.11	4.40763	+
chr1	160954952	160954961	three_prime_UTR;Rc3h1;protein_coding;ENSMUSG00000040423.11	7.78205	+
chr1	160955097	160955106	three_prime_UTR;Rc3h1;protein_coding;ENSMUSG00000040423.11	37.5261	+
chr1	160955114	160955123	three_prime_UTR;Rc3h1;protein_coding;ENSMUSG00000040423.11	15.5808	+
chr1	160955846	160955855	three_prime_UTR;Rc3h1;protein_coding;ENSMUSG00000040423.11	3.51612	+
chr1	160955931	160955940	three_prime_UTR;Rc3h1;protein_coding;ENSMUSG00000040423.11	28.1286	+
chr1	160955953	160955962	three_prime_UTR;Rc3h1;protein_coding;ENSMUSG00000040423.11	4.03868	+
chr1	160959445	160959454	three_prime_UTR;Rc3h1;protein_coding;ENSMUSG00000040423.11	76.4486	+
chr1	160959467	160959476	three_prime_UTR;Rc3h1;protein_coding;ENSMUSG00000040423.11	4.48448	+
chr1	160959487	160959496	three_prime_UTR;Rc3h1;protein_coding;ENSMUSG00000040423.11	9.60499	+
chr1	160959510	160959519	three_prime_UTR;Rc3h1;protein_coding;ENSMUSG00000040423.11	2.62914	+
chr1	160962468	160962477	three_prime_UTR;Rc3h1;protein_coding;ENSMUSG00000040423.11	14.9586	+
chr1	160963476	160963485	intron;Rc3h1;protein_coding;ENSMUSG00000040423.11	12.1592	+
chr1	160963486	160963495	three_prime_UTR;Rc3h1;protein_coding;ENSMUSG00000040423.11	17.3074	+
chr1	160965057	160965066	three_prime_UTR;Rc3h1;protein_coding;ENSMUSG00000040423.11	8.29209	+
chr1	160965087	160965096	three_prime_UTR;Rc3h1;protein_coding;ENSMUSG00000040423.11	6.82451	+
chr1	160965696	160965705	three_prime_UTR;Rc3h1;protein_coding;ENSMUSG00000040423.11	3.27073	+
chr1	160967715	160967724	three_prime_UTR;Rc3h1;protein_coding;ENSMUSG00000040423.11	24.8246	+
chr1	160967726	160967735	three_prime_UTR;Rc3h1;protein_coding;ENSMUSG00000040423.11	16.3165	+
chr1	160967745	160967754	three_prime_UTR;Rc3h1;protein_coding;ENSMUSG00000040423.11	8.88595	+
chr1	160967781	160967790	three_prime_UTR;Rc3h1;protein_coding;ENSMUSG00000040423.11	5.92886	+
chr1	160967794	160967803	three_prime_UTR;Rc3h1;protein_coding;ENSMUSG00000040423.11	3.53611	+
chr1	160967980	160967989	three_prime_UTR;Rc3h1;protein_coding;ENSMUSG00000040423.11	15.3588	+
chr1	160967996	160968005	three_prime_UTR;Rc3h1;protein_coding;ENSMUSG00000040423.11	259.459	+
chr1	160968014	160968023	three_prime_UTR;Rc3h1;protein_coding;ENSMUSG00000040423.11	36.8777	+
chr1	160968057	160968066	three_prime_UTR;Rc3h1;protein_coding;ENSMUSG00000040423.11	80.9365	+
chr1	160968132	160968141	three_prime_UTR;Rc3h1;protein_coding;ENSMUSG00000040423.11	15.2305	+
chr1	160968168	160968177	three_prime_UTR;Rc3h1;protein_coding;ENSMUSG00000040423.11	84.9286	+
chr1	160968260	160968269	three_prime_UTR;Rc3h1;protein_coding;ENSMUSG00000040423.11	14.9623	+
chr1	160968319	160968328	three_prime_UTR;Rc3h1;protein_coding;ENSMUSG00000040423.11	5.87771	+
chr1	160968334	160968343	three_prime_UTR;Rc3h1;protein_coding;ENSMUSG00000040423.11	71.5761	+
chr1	160968476	160968485	three_prime_UTR;Rc3h1;protein_coding;ENSMUSG00000040423.11	53.7097	+
chr1	160968553	160968562	three_prime_UTR;Rc3h1;protein_coding;ENSMUSG00000040423.11	14.22	+
chr1	160968958	160968967	three_prime_UTR;Rc3h1;protein_coding;ENSMUSG00000040423.11	1.02738	+
chr1	160968974	160968983	three_prime_UTR;Rc3h1;protein_coding;ENSMUSG00000040423.11	9.71694	+
chr1	160969040	160969049	three_prime_UTR;Rc3h1;protein_coding;ENSMUSG00000040423.11	11.3488	+
chr1	160969056	160969065	three_prime_UTR;Rc3h1;protein_coding;ENSMUSG00000040423.11	9.60486	+
chr1	160969191	160969200	three_prime_UTR;Rc3h1;protein_coding;ENSMUSG00000040423.11	15.4608	+
chr1	160969223	160969232	three_prime_UTR;Rc3h1;protein_coding;ENSMUSG00000040423.11	78.7714	+
chr1	160969288	160969297	three_prime_UTR;Rc3h1;protein_coding;ENSMUSG00000040423.11	31.9455	+
chr1	160969312	160969321	three_prime_UTR;Rc3h1;protein_coding;ENSMUSG00000040423.11	40.276	+
chr1	160969474	160969483	three_prime_UTR;Rc3h1;protein_coding;ENSMUSG00000040423.11	14.7822	+
chr1	160969566	160969575	three_prime_UTR;Rc3h1;protein_coding;ENSMUSG00000040423.11	8.35534	+
chr1	160969580	160969589	three_prime_UTR;Rc3h1;protein_coding;ENSMUSG00000040423.11	94.1403	+
chr1	160969649	160969658	three_prime_UTR;Rc3h1;protein_coding;ENSMUSG00000040423.11	52.0289	+
chr1	160969674	160969683	three_prime_UTR;Rc3h1;protein_coding;ENSMUSG00000040423.11	2.96866	+
chr1	160969798	160969807	three_prime_UTR;Rc3h1;protein_coding;ENSMUSG00000040423.11	20.4288	+
chr1	160969920	160969929	three_prime_UTR;Rc3h1;protein_coding;ENSMUSG00000040423.11	20.1754	+
chr1	160970053	160970062	three_prime_UTR;Rc3h1;protein_coding;ENSMUSG00000040423.11	23.0094	+
chr1	160970107	160970116	three_prime_UTR;Rc3h1;protein_coding;ENSMUSG00000040423.11	1.02766	+
chr1	160970122	160970131	three_prime_UTR;Rc3h1;protein_coding;ENSMUSG00000040423.11	4.41258	+
chr1	160970172	160970181	three_prime_UTR;Rc3h1;protein_coding;ENSMUSG00000040423.11	12.299	+
chr1	160970234	160970243	three_prime_UTR;Rc3h1;protein_coding;ENSMUSG00000040423.11	6.29881	+
chr1	160970301	160970310	three_prime_UTR;Rc3h1;protein_coding;ENSMUSG00000040423.11	18.1826	+
chr1	160970318	160970327	three_prime_UTR;Rc3h1;protein_coding;ENSMUSG00000040423.11	9.46579	+
chr1	160970430	160970439	three_prime_UTR;Rc3h1;protein_coding;ENSMUSG00000040423.11	16.033	+
chr1	160970550	160970559	three_prime_UTR;Rc3h1;protein_coding;ENSMUSG00000040423.11	34.4935	+
chr1	160970613	160970622	three_prime_UTR;Rc3h1;protein_coding;ENSMUSG00000040423.11	17.1878	+
chr1	160970714	160970723	three_prime_UTR;Rc3h1;protein_coding;ENSMUSG00000040423.11	31.9923	+
chr1	160970796	160970805	three_prime_UTR;Rc3h1;protein_coding;ENSMUSG00000040423.11	20.4888	+
chr1	160971104	160971113	three_prime_UTR;Rc3h1;protein_coding;ENSMUSG00000040423.11	10.6847	+
chr1	160971147	160971156	three_prime_UTR;Rc3h1;protein_coding;ENSMUSG00000040423.11	19.6735	+
chr1	160971184	160971193	three_prime_UTR;Rc3h1;protein_coding;ENSMUSG00000040423.11	19.223	+
chr1	160971214	160971223	three_prime_UTR;Rc3h1;protein_coding;ENSMUSG00000040423.11	3.21474	+
chr1	160971274	160971283	three_prime_UTR;Rc3h1;protein_coding;ENSMUSG00000040423.11	14.6446	+
chr1	160971287	160971296	three_prime_UTR;Rc3h1;protein_coding;ENSMUSG00000040423.11	13.3354	+
chr1	160971298	160971307	three_prime_UTR;Rc3h1;protein_coding;ENSMUSG00000040423.11	5.93118	+
chr1	160971336	160971345	three_prime_UTR;Rc3h1;protein_coding;ENSMUSG00000040423.11	51.7762	+
chr1	160971395	160971404	three_prime_UTR;Rc3h1;protein_coding;ENSMUSG00000040423.11	105.511	+
chr1	160971442	160971451	three_prime_UTR;Rc3h1;protein_coding;ENSMUSG00000040423.11	20.5664	+
chr1	160971509	160971518	three_prime_UTR;Rc3h1;protein_coding;ENSMUSG00000040423.11	16.7269	+
chr1	160971598	160971607	three_prime_UTR;Rc3h1;protein_coding;ENSMUSG00000040423.11	103.668	+
chr1	160971619	160971628	three_prime_UTR;Rc3h1;protein_coding;ENSMUSG00000040423.11	194.405	+
chr1	160971639	160971648	three_prime_UTR;Rc3h1;protein_coding;ENSMUSG00000040423.11	83.9527	+
chr1	160971661	160971670	three_prime_UTR;Rc3h1;protein_coding;ENSMUSG00000040423.11	98.0309	+
chr1	160971676	160971685	three_prime_UTR;Rc3h1;protein_coding;ENSMUSG00000040423.11	431.272	+
chr1	160971690	160971699	three_prime_UTR;Rc3h1;protein_coding;ENSMUSG00000040423.11	19.1182	+
chr1	160971868	160971877	three_prime_UTR;Rc3h1;protein_coding;ENSMUSG00000040423.11	1.77494	+
chr1	160971940	160971949	three_prime_UTR;Rc3h1;protein_coding;ENSMUSG00000040423.11	65.0603	+
chr1	160971952	160971961	three_prime_UTR;Rc3h1;protein_coding;ENSMUSG00000040423.11	18.0318	+
chr1	160971966	160971975	three_prime_UTR;Rc3h1;protein_coding;ENSMUSG00000040423.11	17.4589	+
chr1	160972055	160972064	three_prime_UTR;Rc3h1;protein_coding;ENSMUSG00000040423.11	5.08817	+
chr1	160972085	160972094	three_prime_UTR;Rc3h1;protein_coding;ENSMUSG00000040423.11	28.5398	+
chr1	160972160	160972169	three_prime_UTR;Rc3h1;protein_coding;ENSMUSG00000040423.11	5.41418	+
chr1	160972266	160972275	three_prime_UTR;Rc3h1;protein_coding;ENSMUSG00000040423.11	4.87293	+
chr1	160972344	160972353	three_prime_UTR;Rc3h1;protein_coding;ENSMUSG00000040423.11	4.3803	+
chr1	160972390	160972399	three_prime_UTR;Rc3h1;protein_coding;ENSMUSG00000040423.11	13.6573	+
chr1	160972417	160972426	three_prime_UTR;Rc3h1;protein_coding;ENSMUSG00000040423.11	1.87273	+
chr1	160972481	160972490	three_prime_UTR;Rc3h1;protein_coding;ENSMUSG00000040423.11	2.69135	+
chr1	160972604	160972613	three_prime_UTR;Rc3h1;protein_coding;ENSMUSG00000040423.11	74.9591	+
chr1	160972695	160972704	three_prime_UTR;Rc3h1;protein_coding;ENSMUSG00000040423.11	12.4553	+
chr1	160972766	160972775	three_prime_UTR;Rc3h1;protein_coding;ENSMUSG00000040423.11	1.5776	+
chr1	160972817	160972826	three_prime_UTR;Rc3h1;protein_coding;ENSMUSG00000040423.11	5.87696	+
chr1	160972827	160972836	three_prime_UTR;Rc3h1;protein_coding;ENSMUSG00000040423.11	17.4116	+
chr1	160972842	160972851	three_prime_UTR;Rc3h1;protein_coding;ENSMUSG00000040423.11	16.6533	+
chr1	160972926	160972935	three_prime_UTR;Rc3h1;protein_coding;ENSMUSG00000040423.11	7.94883	+
chr1	160973118	160973127	three_prime_UTR;Rc3h1;protein_coding;ENSMUSG00000040423.11	19.5177	+
chr1	160973151	160973160	three_prime_UTR;Rc3h1;protein_coding;ENSMUSG00000040423.11	4.7569	+
chr1	160973273	160973282	three_prime_UTR;Rc3h1;protein_coding;ENSMUSG00000040423.11	112.591	+
chr1	160973328	160973337	three_prime_UTR;Rc3h1;protein_coding;ENSMUSG00000040423.11	31.5045	+
chr1	160973466	160973475	three_prime_UTR;Rc3h1;protein_coding;ENSMUSG00000040423.11	87.4004	+
chr1	160973591	160973600	three_prime_UTR;Rc3h1;protein_coding;ENSMUSG00000040423.11	11.7849	+
chr1	160973608	160973617	three_prime_UTR;Rc3h1;protein_coding;ENSMUSG00000040423.11	3.99244	+
chr1	160973650	160973659	three_prime_UTR;Rc3h1;protein_coding;ENSMUSG00000040423.11	70.6193	+
chr1	160973663	160973672	three_prime_UTR;Rc3h1;protein_coding;ENSMUSG00000040423.11	28.3192	+
chr1	160973689	160973698	three_prime_UTR;Rc3h1;protein_coding;ENSMUSG00000040423.11	29.2596	+
chr1	160973699	160973708	three_prime_UTR;Rc3h1;protein_coding;ENSMUSG00000040423.11	15.997	+
chr1	160973783	160973792	three_prime_UTR;Rc3h1;protein_coding;ENSMUSG00000040423.11	42.9517	+
chr1	160973818	160973827	three_prime_UTR;Rc3h1;protein_coding;ENSMUSG00000040423.11	9.10721	+
chr1	160973963	160973972	three_prime_UTR;Rc3h1;protein_coding;ENSMUSG00000040423.11	4.98351	+
chr1	160973977	160973986	three_prime_UTR;Rc3h1;protein_coding;ENSMUSG00000040423.11	36.5999	+
chr1	160974013	160974022	three_prime_UTR;Rc3h1;protein_coding;ENSMUSG00000040423.11	36.2159	+
chr1	160974028	160974037	three_prime_UTR;Rc3h1;protein_coding;ENSMUSG00000040423.11	132.681	+
chr1	160974053	160974062	three_prime_UTR;Rc3h1;protein_coding;ENSMUSG00000040423.11	99.7901	+
chr1	160974089	160974098	three_prime_UTR;Rc3h1;protein_coding;ENSMUSG00000040423.11	15.8317	+
chr1	160974179	160974188	three_prime_UTR;Rc3h1;protein_coding;ENSMUSG00000040423.11	3.97223	+
chr1	160974196	160974205	three_prime_UTR;Rc3h1;protein_coding;ENSMUSG00000040423.11	2.70057	+
chr1	160974217	160974226	three_prime_UTR;Rc3h1;protein_coding;ENSMUSG00000040423.11	35.262	+
chr1	160974270	160974279	three_prime_UTR;Rc3h1;protein_coding;ENSMUSG00000040423.11	22.9353	+
chr1	160974280	160974289	three_prime_UTR;Rc3h1;protein_coding;ENSMUSG00000040423.11	5.8588	+
chr1	160974620	160974629	three_prime_UTR;Rc3h1;protein_coding;ENSMUSG00000040423.11	8.16574	+
chr1	160974644	160974653	three_prime_UTR;Rc3h1;protein_coding;ENSMUSG00000040423.11	19.5269	+
chr1	160974662	160974671	three_prime_UTR;Rc3h1;protein_coding;ENSMUSG00000040423.11	25.4051	+
chr1	160974726	160974735	three_prime_UTR;Rc3h1;protein_coding;ENSMUSG00000040423.11	2.22763	+
chr1	160974736	160974745	three_prime_UTR;Rc3h1;protein_coding;ENSMUSG00000040423.11	57.6919	+
chr1	160974757	160974766	three_prime_UTR;Rc3h1;protein_coding;ENSMUSG00000040423.11	14.5004	+
chr1	160974782	160974791	three_prime_UTR;Rc3h1;protein_coding;ENSMUSG00000040423.11	17.3534	+
chr1	160974859	160974868	three_prime_UTR;Rc3h1;protein_coding;ENSMUSG00000040423.11	2.47354	+
chr1	160974887	160974896	three_prime_UTR;Rc3h1;protein_coding;ENSMUSG00000040423.11	1.9038	+
chr1	161088436	161088445	three_prime_UTR;Klhl20;protein_coding;ENSMUSG00000026705.16	75.783	-
chr1	161088446	161088455	three_prime_UTR;Klhl20;protein_coding;ENSMUSG00000026705.16	27.7642	-
chr1	161088493	161088502	three_prime_UTR;Klhl20;protein_coding;ENSMUSG00000026705.16	19.254	-
chr1	162672148	162672157	three_prime_UTR;Prrc2c;protein_coding;ENSMUSG00000040225.15	245.907	-
chr1	162672786	162672795	three_prime_UTR;Prrc2c;protein_coding;ENSMUSG00000040225.15	49.4677	-
chr1	162672824	162672833	three_prime_UTR;Prrc2c;protein_coding;ENSMUSG00000040225.15	0.92301	-
chr1	162672840	162672849	three_prime_UTR;Prrc2c;protein_coding;ENSMUSG00000040225.15	15.5719	-
chr1	162672850	162672859	three_prime_UTR;Prrc2c;protein_coding;ENSMUSG00000040225.15	41.4785	-
chr1	162673355	162673364	three_prime_UTR;Prrc2c;protein_coding;ENSMUSG00000040225.15	18.9823	-
chr1	162673365	162673374	three_prime_UTR;Prrc2c;protein_coding;ENSMUSG00000040225.15	49.5689	-
chr1	162680022	162680031	CDS;Prrc2c;protein_coding;ENSMUSG00000040225.15	43.9834	-
chr1	162680040	162680049	CDS;Prrc2c;protein_coding;ENSMUSG00000040225.15	80.4505	-
chr1	162684073	162684082	CDS;Prrc2c;protein_coding;ENSMUSG00000040225.15	9.1216	-
chr1	162691150	162691159	CDS;Prrc2c;protein_coding;ENSMUSG00000040225.15	18.2994	-
chr1	162691171	162691180	CDS;Prrc2c;protein_coding;ENSMUSG00000040225.15	8.50121	-
chr1	162692835	162692844	CDS;Prrc2c;protein_coding;ENSMUSG00000040225.15	54.3055	-
chr1	164065335	164065344	CDS;Sell;protein_coding;ENSMUSG00000026581.14	6.16366	+
chr1	164065619	164065628	CDS;Sell;protein_coding;ENSMUSG00000026581.14	4.7894	+
chr1	164065658	164065667	CDS;Sell;protein_coding;ENSMUSG00000026581.14	18.3241	+
chr1	164065908	164065917	intron;Sell;protein_coding;ENSMUSG00000026581.14	4.27836	+
chr1	164066229	164066238	CDS;Sell;protein_coding;ENSMUSG00000026581.14	22.0035	+
chr1	164066276	164066285	CDS;Sell;protein_coding;ENSMUSG00000026581.14	34.9717	+
chr1	164066306	164066315	CDS;Sell;protein_coding;ENSMUSG00000026581.14	10.495	+
chr1	164072211	164072220	CDS;Sell;protein_coding;ENSMUSG00000026581.14	63.8773	+
chr1	164079751	164079760	three_prime_UTR;Sell;protein_coding;ENSMUSG00000026581.14	6.28556	+
chr1	164079772	164079781	three_prime_UTR;Sell;protein_coding;ENSMUSG00000026581.14	9.42896	+
chr1	164079793	164079802	three_prime_UTR;Sell;protein_coding;ENSMUSG00000026581.14	25.2184	+
chr1	164079815	164079824	three_prime_UTR;Sell;protein_coding;ENSMUSG00000026581.14	60.8363	+
chr1	164079860	164079869	three_prime_UTR;Sell;protein_coding;ENSMUSG00000026581.14	1.08773	+
chr1	164079904	164079913	three_prime_UTR;Sell;protein_coding;ENSMUSG00000026581.14	69.842	+
chr1	164079923	164079932	three_prime_UTR;Sell;protein_coding;ENSMUSG00000026581.14	53.0728	+
chr1	164079993	164080002	three_prime_UTR;Sell;protein_coding;ENSMUSG00000026581.14	6.28214	+
chr1	164080007	164080016	three_prime_UTR;Sell;protein_coding;ENSMUSG00000026581.14	2.6244	+
chr1	164080132	164080141	three_prime_UTR;Sell;protein_coding;ENSMUSG00000026581.14	18.8871	+
chr1	164080157	164080166	three_prime_UTR;Sell;protein_coding;ENSMUSG00000026581.14	15.2653	+
chr1	164080183	164080192	three_prime_UTR;Sell;protein_coding;ENSMUSG00000026581.14	11.0203	+
chr1	164080218	164080227	three_prime_UTR;Sell;protein_coding;ENSMUSG00000026581.14	14.5607	+
chr1	164080231	164080240	three_prime_UTR;Sell;protein_coding;ENSMUSG00000026581.14	27.3682	+
chr1	164080251	164080260	three_prime_UTR;Sell;protein_coding;ENSMUSG00000026581.14	29.4628	+
chr1	164080356	164080365	three_prime_UTR;Sell;protein_coding;ENSMUSG00000026581.14	23.64	+
chr1	164080391	164080400	three_prime_UTR;Sell;protein_coding;ENSMUSG00000026581.14	18.8549	+
chr1	164080402	164080411	three_prime_UTR;Sell;protein_coding;ENSMUSG00000026581.14	7.53408	+
chr1	164080467	164080476	three_prime_UTR;Sell;protein_coding;ENSMUSG00000026581.14	4.73661	+
chr1	164080497	164080506	three_prime_UTR;Sell;protein_coding;ENSMUSG00000026581.14	66.2159	+
chr1	164080562	164080571	three_prime_UTR;Sell;protein_coding;ENSMUSG00000026581.14	17.3081	+
chr1	164080590	164080599	three_prime_UTR;Sell;protein_coding;ENSMUSG00000026581.14	9.08421	+
chr1	164080707	164080716	three_prime_UTR;Sell;protein_coding;ENSMUSG00000026581.14	19.8515	+
chr1	164080734	164080743	three_prime_UTR;Sell;protein_coding;ENSMUSG00000026581.14	29.9143	+
chr1	164080748	164080757	three_prime_UTR;Sell;protein_coding;ENSMUSG00000026581.14	2.09275	+
chr1	164080842	164080851	three_prime_UTR;Sell;protein_coding;ENSMUSG00000026581.14	25.0193	+
chr1	164080954	164080963	three_prime_UTR;Sell;protein_coding;ENSMUSG00000026581.14	6.30863	+
chr1	164080988	164080997	three_prime_UTR;Sell;protein_coding;ENSMUSG00000026581.14	1.5745	+
chr1	164081080	164081089	three_prime_UTR;Sell;protein_coding;ENSMUSG00000026581.14	5.13573	+
chr1	164081160	164081169	three_prime_UTR;Sell;protein_coding;ENSMUSG00000026581.14	52.0931	+
chr1	164081196	164081205	three_prime_UTR;Sell;protein_coding;ENSMUSG00000026581.14	46.3153	+
chr1	164081215	164081224	three_prime_UTR;Sell;protein_coding;ENSMUSG00000026581.14	3.01885	+
chr1	164081406	164081415	three_prime_UTR;Sell;protein_coding;ENSMUSG00000026581.14	5.42932	+
chr1	164081427	164081436	three_prime_UTR;Sell;protein_coding;ENSMUSG00000026581.14	32.5502	+
chr1	164081465	164081474	three_prime_UTR;Sell;protein_coding;ENSMUSG00000026581.14	0.217491	+
chr1	164081475	164081484	three_prime_UTR;Sell;protein_coding;ENSMUSG00000026581.14	16.0425	+
chr1	164081501	164081510	three_prime_UTR;Sell;protein_coding;ENSMUSG00000026581.14	4.29499	+
chr1	164082146	164082155	three_prime_UTR;Sell;protein_coding;ENSMUSG00000026581.14	9.79477	+
chr1	164082304	164082313	three_prime_UTR;Sell;protein_coding;ENSMUSG00000026581.14	21.0484	+
chr1	164082340	164082349	three_prime_UTR;Sell;protein_coding;ENSMUSG00000026581.14	11.7725	+
chr1	164082380	164082389	three_prime_UTR;Sell;protein_coding;ENSMUSG00000026581.14	10.1181	+
chr1	164082418	164082427	three_prime_UTR;Sell;protein_coding;ENSMUSG00000026581.14	1.90361	+
chr1	164082473	164082482	three_prime_UTR;Sell;protein_coding;ENSMUSG00000026581.14	15.6186	+
chr1	164082676	164082685	three_prime_UTR;Sell;protein_coding;ENSMUSG00000026581.14	7.96254	+
chr1	164082690	164082699	three_prime_UTR;Sell;protein_coding;ENSMUSG00000026581.14	24.4669	+
chr1	164082720	164082729	three_prime_UTR;Sell;protein_coding;ENSMUSG00000026581.14	7.08016	+
chr1	164082759	164082768	three_prime_UTR;Sell;protein_coding;ENSMUSG00000026581.14	11.0069	+
chr1	164082816	164082825	three_prime_UTR;Sell;protein_coding;ENSMUSG00000026581.14	31.5516	+
chr1	164082832	164082841	three_prime_UTR;Sell;protein_coding;ENSMUSG00000026581.14	2.96613	+
chr1	164082843	164082852	three_prime_UTR;Sell;protein_coding;ENSMUSG00000026581.14	55.1664	+
chr1	164308181	164308190	five_prime_UTR;Nme7;protein_coding;ENSMUSG00000026575.15	23.7973	+
chr1	164308213	164308222	five_prime_UTR;Nme7;protein_coding;ENSMUSG00000026575.15	18.9199	+
chr1	165178638	165178647	three_prime_UTR;Sft2d2;protein_coding;ENSMUSG00000040848.11	18.2671	-
chr1	165178648	165178657	three_prime_UTR;Sft2d2;protein_coding;ENSMUSG00000040848.11	19.9974	-
chr1	165179033	165179042	three_prime_UTR;Sft2d2;protein_coding;ENSMUSG00000040848.11	48.7225	-
chr1	165179044	165179053	three_prime_UTR;Sft2d2;protein_coding;ENSMUSG00000040848.11	3.57356	-
chr1	165179054	165179063	three_prime_UTR;Sft2d2;protein_coding;ENSMUSG00000040848.11	57.2052	-
chr1	165179099	165179108	three_prime_UTR;Sft2d2;protein_coding;ENSMUSG00000040848.11	9.99843	-
chr1	165179120	165179129	three_prime_UTR;Sft2d2;protein_coding;ENSMUSG00000040848.11	165.077	-
chr1	165215655	165215664	three_prime_UTR;Tiprl;protein_coding;ENSMUSG00000040843.10	6.81276	-
chr1	165670002	165670011	intron;Rcsd1;protein_coding;ENSMUSG00000040723.14	7.1734	-
chr1	165670036	165670045	intron;Rcsd1;protein_coding;ENSMUSG00000040723.14	10.1686	-
chr1	165670119	165670128	intron;Rcsd1;protein_coding;ENSMUSG00000040723.14	1.524	-
chr1	165670327	165670336	intron;Rcsd1;protein_coding;ENSMUSG00000040723.14	2.83612	-
chr1	165671099	165671108	intron;Rcsd1;protein_coding;ENSMUSG00000040723.14	10.4814	-
chr1	165671306	165671315	intron;Rcsd1;protein_coding;ENSMUSG00000040723.14	15.1822	-
chr1	165671406	165671415	intron;Rcsd1;protein_coding;ENSMUSG00000040723.14	6.58013	-
chr1	165671440	165671449	intron;Rcsd1;protein_coding;ENSMUSG00000040723.14	55.3373	-
chr1	165671800	165671809	intron;Rcsd1;protein_coding;ENSMUSG00000040723.14	2.79404	-
chr1	165861014	165861023	CDS;Cd247;protein_coding;ENSMUSG00000005763.15	8.22012	+
chr1	165861026	165861035	CDS;Cd247;protein_coding;ENSMUSG00000005763.15	32.9947	+
chr1	165861040	165861049	CDS;Cd247;protein_coding;ENSMUSG00000005763.15	24.3261	+
chr1	165861065	165861074	CDS;Cd247;protein_coding;ENSMUSG00000005763.15	1.12276	+
chr1	165861688	165861697	three_prime_UTR;Cd247;protein_coding;ENSMUSG00000005763.15	2.40418	+
chr1	165865229	165865238	three_prime_UTR;Pou2f1;protein_coding;ENSMUSG00000026565.18	5.04725	-
chr1	165865253	165865262	three_prime_UTR;Pou2f1;protein_coding;ENSMUSG00000026565.18	41.0227	-
chr1	165865571	165865580	three_prime_UTR;Pou2f1;protein_coding;ENSMUSG00000026565.18	0.652922	-
chr1	165865585	165865594	three_prime_UTR;Pou2f1;protein_coding;ENSMUSG00000026565.18	33.8179	-
chr1	165865623	165865632	three_prime_UTR;Pou2f1;protein_coding;ENSMUSG00000026565.18	3.28519	-
chr1	165865641	165865650	three_prime_UTR;Pou2f1;protein_coding;ENSMUSG00000026565.18	51.6772	-
chr1	165866191	165866200	three_prime_UTR;Pou2f1;protein_coding;ENSMUSG00000026565.18	9.35402	-
chr1	165866452	165866461	three_prime_UTR;Pou2f1;protein_coding;ENSMUSG00000026565.18	17.0941	-
chr1	165866485	165866494	three_prime_UTR;Pou2f1;protein_coding;ENSMUSG00000026565.18	68.0526	-
chr1	165873341	165873350	three_prime_UTR;Pou2f1;protein_coding;ENSMUSG00000026565.18	14.2681	-
chr1	165875219	165875228	three_prime_UTR;Pou2f1;protein_coding;ENSMUSG00000026565.18	7.33257	-
chr1	165875260	165875269	three_prime_UTR;Pou2f1;protein_coding;ENSMUSG00000026565.18	43.445	-
chr1	166391931	166391940	CDS;Tada1;protein_coding;ENSMUSG00000026563.13	10.0784	+
chr1	166391959	166391968	CDS;Tada1;protein_coding;ENSMUSG00000026563.13	2.72164	+
chr1	166392560	166392569	intron;Tada1;protein_coding;ENSMUSG00000026563.13	13.9909	+
chr1	166392575	166392584	CDS;Tada1;protein_coding;ENSMUSG00000026563.13	18.721	+
chr1	166392609	166392618	CDS;Tada1;protein_coding;ENSMUSG00000026563.13	21.4511	+
chr1	166392765	166392774	three_prime_UTR;Tada1;protein_coding;ENSMUSG00000026563.13	110.581	+
chr1	166392794	166392803	three_prime_UTR;Tada1;protein_coding;ENSMUSG00000026563.13	159.111	+
chr1	166392812	166392821	three_prime_UTR;Tada1;protein_coding;ENSMUSG00000026563.13	293.786	+
chr1	166392919	166392928	three_prime_UTR;Tada1;protein_coding;ENSMUSG00000026563.13	33.1898	+
chr1	166392941	166392950	three_prime_UTR;Tada1;protein_coding;ENSMUSG00000026563.13	1.84817	+
chr1	166393029	166393038	three_prime_UTR;Tada1;protein_coding;ENSMUSG00000026563.13	19.6005	+
chr1	166393039	166393048	three_prime_UTR;Tada1;protein_coding;ENSMUSG00000026563.13	11.8655	+
chr1	166393079	166393088	three_prime_UTR;Tada1;protein_coding;ENSMUSG00000026563.13	4.37926	+
chr1	166393157	166393166	three_prime_UTR;Tada1;protein_coding;ENSMUSG00000026563.13	6.68703	+
chr1	166393233	166393242	three_prime_UTR;Tada1;protein_coding;ENSMUSG00000026563.13	1.89689	+
chr1	166393277	166393286	three_prime_UTR;Tada1;protein_coding;ENSMUSG00000026563.13	4.24055	+
chr1	166393312	166393321	three_prime_UTR;Tada1;protein_coding;ENSMUSG00000026563.13	2.09385	+
chr1	166393328	166393337	three_prime_UTR;Tada1;protein_coding;ENSMUSG00000026563.13	8.24303	+
chr1	166393357	166393366	three_prime_UTR;Tada1;protein_coding;ENSMUSG00000026563.13	20.1088	+
chr1	166393370	166393379	three_prime_UTR;Tada1;protein_coding;ENSMUSG00000026563.13	5.16999	+
chr1	166393486	166393495	three_prime_UTR;Tada1;protein_coding;ENSMUSG00000026563.13	16.744	+
chr1	166393504	166393513	three_prime_UTR;Tada1;protein_coding;ENSMUSG00000026563.13	5.05302	+
chr1	166393516	166393525	three_prime_UTR;Tada1;protein_coding;ENSMUSG00000026563.13	17.5985	+
chr1	166393548	166393557	three_prime_UTR;Tada1;protein_coding;ENSMUSG00000026563.13	12.2401	+
chr1	167330330	167330339	three_prime_UTR;Tmco1;protein_coding;ENSMUSG00000052428.10	1.42564	+
chr1	169498353	169498362	three_prime_UTR;Nuf2;protein_coding;ENSMUSG00000026683.14	490.674	-
chr1	169498375	169498384	three_prime_UTR;Nuf2;protein_coding;ENSMUSG00000026683.14	791.609	-
chr1	169498621	169498630	three_prime_UTR;Nuf2;protein_coding;ENSMUSG00000026683.14	51.5051	-
chr1	169498652	169498661	three_prime_UTR;Nuf2;protein_coding;ENSMUSG00000026683.14	120.025	-
chr1	169498663	169498672	three_prime_UTR;Nuf2;protein_coding;ENSMUSG00000026683.14	21.9391	-
chr1	169498689	169498698	three_prime_UTR;Nuf2;protein_coding;ENSMUSG00000026683.14	11.2746	-
chr1	169498763	169498772	three_prime_UTR;Nuf2;protein_coding;ENSMUSG00000026683.14	208.879	-
chr1	169498776	169498785	three_prime_UTR;Nuf2;protein_coding;ENSMUSG00000026683.14	37.1642	-
chr1	169498834	169498843	CDS;Nuf2;protein_coding;ENSMUSG00000026683.14	7.39579	-
chr1	169498876	169498885	CDS;Nuf2;protein_coding;ENSMUSG00000026683.14	60.3171	-
chr1	169498907	169498916	CDS;Nuf2;protein_coding;ENSMUSG00000026683.14	39.6947	-
chr1	169504505	169504514	CDS;Nuf2;protein_coding;ENSMUSG00000026683.14	7.05593	-
chr1	169504526	169504535	CDS;Nuf2;protein_coding;ENSMUSG00000026683.14	0.649237	-
chr1	169504539	169504548	CDS;Nuf2;protein_coding;ENSMUSG00000026683.14	20.4322	-
chr1	169504549	169504558	CDS;Nuf2;protein_coding;ENSMUSG00000026683.14	6.62292	-
chr1	169504561	169504570	CDS;Nuf2;protein_coding;ENSMUSG00000026683.14	5.24886	-
chr1	169504581	169504590	CDS;Nuf2;protein_coding;ENSMUSG00000026683.14	34.867	-
chr1	169504596	169504605	CDS;Nuf2;protein_coding;ENSMUSG00000026683.14	1.94203	-
chr1	169505900	169505909	intron;Nuf2;protein_coding;ENSMUSG00000026683.14	1.89025	-
chr1	169505913	169505922	intron;Nuf2;protein_coding;ENSMUSG00000026683.14	3.47261	-
chr1	169505997	169506006	CDS;Nuf2;protein_coding;ENSMUSG00000026683.14	54.8227	-
chr1	169506026	169506035	CDS;Nuf2;protein_coding;ENSMUSG00000026683.14	32.7306	-
chr1	169506064	169506073	CDS;Nuf2;protein_coding;ENSMUSG00000026683.14	0.749283	-
chr1	169506119	169506128	CDS;Nuf2;protein_coding;ENSMUSG00000026683.14	36.8278	-
chr1	169506213	169506222	intron;Nuf2;protein_coding;ENSMUSG00000026683.14	3.24635	-
chr1	169506469	169506478	intron;Nuf2;protein_coding;ENSMUSG00000026683.14	13.2751	-
chr1	169506685	169506694	intron;Nuf2;protein_coding;ENSMUSG00000026683.14	17.5705	-
chr1	169507258	169507267	CDS;Nuf2;protein_coding;ENSMUSG00000026683.14	6.07243	-
chr1	169507321	169507330	CDS;Nuf2;protein_coding;ENSMUSG00000026683.14	33.9768	-
chr1	169507354	169507363	CDS;Nuf2;protein_coding;ENSMUSG00000026683.14	2.25779	-
chr1	169510528	169510537	CDS;Nuf2;protein_coding;ENSMUSG00000026683.14	3.30497	-
chr1	169516592	169516601	CDS;Nuf2;protein_coding;ENSMUSG00000026683.14	21.8967	-
chr1	169516610	169516619	CDS;Nuf2;protein_coding;ENSMUSG00000026683.14	22.6935	-
chr1	169516620	169516629	CDS;Nuf2;protein_coding;ENSMUSG00000026683.14	3.89962	-
chr1	169516652	169516661	CDS;Nuf2;protein_coding;ENSMUSG00000026683.14	3.16313	-
chr1	169522376	169522385	CDS;Nuf2;protein_coding;ENSMUSG00000026683.14	29.1268	-
chr1	169522407	169522416	CDS;Nuf2;protein_coding;ENSMUSG00000026683.14	22.1933	-
chr1	169522874	169522883	CDS;Nuf2;protein_coding;ENSMUSG00000026683.14	13.5942	-
chr1	169523906	169523915	CDS;Nuf2;protein_coding;ENSMUSG00000026683.14	2.63181	-
chr1	169523941	169523950	CDS;Nuf2;protein_coding;ENSMUSG00000026683.14	11.0686	-
chr1	169523954	169523963	CDS;Nuf2;protein_coding;ENSMUSG00000026683.14	24.7845	-
chr1	169525323	169525332	CDS;Nuf2;protein_coding;ENSMUSG00000026683.14	17.9048	-
chr1	169525337	169525346	CDS;Nuf2;protein_coding;ENSMUSG00000026683.14	10.5762	-
chr1	169525399	169525408	CDS;Nuf2;protein_coding;ENSMUSG00000026683.14	17.8565	-
chr1	169528761	169528770	five_prime_UTR;Nuf2;protein_coding;ENSMUSG00000026683.14	23.1888	-
chr1	169531386	169531395	five_prime_UTR;Nuf2;protein_coding;ENSMUSG00000026683.14	5.55106	-
chr1	170196880	170196889	three_prime_UTR;Uhmk1;protein_coding;ENSMUSG00000026667.14	9.27092	-
chr1	170198340	170198349	three_prime_UTR;Uhmk1;protein_coding;ENSMUSG00000026667.14	147.944	-
chr1	171402195	171402204	CDS;Arhgap30;protein_coding;ENSMUSG00000048865.16	20.2984	+
chr1	171408770	171408779	CDS;Arhgap30;protein_coding;ENSMUSG00000048865.16	118.844	+
chr1	171409431	171409440	three_prime_UTR;Arhgap30;protein_coding;ENSMUSG00000048865.16	48.9349	+
chr1	171409460	171409469	three_prime_UTR;Arhgap30;protein_coding;ENSMUSG00000048865.16	8.88174	+
chr1	171409475	171409484	three_prime_UTR;Arhgap30;protein_coding;ENSMUSG00000048865.16	25.2667	+
chr1	171409507	171409516	three_prime_UTR;Arhgap30;protein_coding;ENSMUSG00000048865.16	39.3897	+
chr1	171409619	171409628	three_prime_UTR;Arhgap30;protein_coding;ENSMUSG00000048865.16	3.59754	+
chr1	171410024	171410033	three_prime_UTR;Arhgap30;protein_coding;ENSMUSG00000048865.16	26.0116	+
chr1	171410134	171410143	three_prime_UTR;Arhgap30;protein_coding;ENSMUSG00000048865.16	49.8383	+
chr1	171682045	171682054	five_prime_UTR;Cd48;protein_coding;ENSMUSG00000015355.13	32.3493	+
chr1	171682062	171682071	five_prime_UTR;Cd48;protein_coding;ENSMUSG00000015355.13	19.276	+
chr1	171682097	171682106	CDS;Cd48;protein_coding;ENSMUSG00000015355.13	10.0358	+
chr1	171704344	171704353	intron;Cd48;protein_coding;ENSMUSG00000015355.13	43.4058	+
chr1	172066162	172066171	three_prime_UTR;Ncstn;protein_coding;ENSMUSG00000003458.12	37.313	-
chr1	172066210	172066219	three_prime_UTR;Ncstn;protein_coding;ENSMUSG00000003458.12	24.0949	-
chr1	172104215	172104224	three_prime_UTR;Copa;protein_coding;ENSMUSG00000026553.17	13.0216	+
chr1	172122092	172122101	three_prime_UTR;Copa;protein_coding;ENSMUSG00000026553.17	6.82914	+
chr1	172122121	172122130	three_prime_UTR;Copa;protein_coding;ENSMUSG00000026553.17	22.9417	+
chr1	172122138	172122147	three_prime_UTR;Copa;protein_coding;ENSMUSG00000026553.17	3.47026	+
chr1	173646794	173646803	three_prime_UTR;Ifi209;protein_coding;ENSMUSG00000043263.13	16.0512	+
chr1	173857301	173857310	three_prime_UTR;Mndal;protein_coding;ENSMUSG00000090272.9	3.23145	-
chr1	173857329	173857338	three_prime_UTR;Mndal;protein_coding;ENSMUSG00000090272.9	27.2562	-
chr1	173857340	173857349	three_prime_UTR;Mndal;protein_coding;ENSMUSG00000090272.9	13.9557	-
chr1	175908591	175908600	three_prime_UTR;Exo1;protein_coding;ENSMUSG00000039748.11	4.58628	+
chr1	175908626	175908635	three_prime_UTR;Exo1;protein_coding;ENSMUSG00000039748.11	3.80448	+
chr1	175908686	175908695	three_prime_UTR;Exo1;protein_coding;ENSMUSG00000039748.11	10.9132	+
chr1	178251044	178251053	three_prime_UTR;Desi2;protein_coding;ENSMUSG00000026502.13	33.819	+
chr1	179746085	179746094	three_prime_UTR;Ahctf1;protein_coding;ENSMUSG00000026491.13	4.84081	-
chr1	179746178	179746187	three_prime_UTR;Ahctf1;protein_coding;ENSMUSG00000026491.13	9.73067	-
chr1	179746217	179746226	three_prime_UTR;Ahctf1;protein_coding;ENSMUSG00000026491.13	14.9339	-
chr1	179755476	179755485	CDS;Ahctf1;protein_coding;ENSMUSG00000026491.13	4.03882	-
chr1	180752643	180752652	three_prime_UTR;Acbd3;protein_coding;ENSMUSG00000026499.5	4.62859	+
chr1	180753667	180753676	three_prime_UTR;Acbd3;protein_coding;ENSMUSG00000026499.5	5.93232	+
chr1	180753678	180753687	three_prime_UTR;Acbd3;protein_coding;ENSMUSG00000026499.5	4.67394	+
chr1	180753759	180753768	three_prime_UTR;Acbd3;protein_coding;ENSMUSG00000026499.5	37.6031	+
chr1	180753787	180753796	three_prime_UTR;Acbd3;protein_coding;ENSMUSG00000026499.5	30.4016	+
chr1	180753802	180753811	three_prime_UTR;Acbd3;protein_coding;ENSMUSG00000026499.5	4.0639	+
chr1	181177312	181177321	three_prime_UTR;Wdr26;protein_coding;ENSMUSG00000038733.14	8.0284	-
chr1	181177337	181177346	three_prime_UTR;Wdr26;protein_coding;ENSMUSG00000038733.14	8.64447	-
chr1	181177469	181177478	three_prime_UTR;Wdr26;protein_coding;ENSMUSG00000038733.14	4.11431	-
chr1	181177488	181177497	three_prime_UTR;Wdr26;protein_coding;ENSMUSG00000038733.14	11.3622	-
chr1	181177753	181177762	three_prime_UTR;Wdr26;protein_coding;ENSMUSG00000038733.14	23.7676	-
chr1	181177768	181177777	three_prime_UTR;Wdr26;protein_coding;ENSMUSG00000038733.14	21.1626	-
chr1	181181387	181181396	three_prime_UTR;Wdr26;protein_coding;ENSMUSG00000038733.14	16.419	-
chr1	181181403	181181412	three_prime_UTR;Wdr26;protein_coding;ENSMUSG00000038733.14	42.232	-
chr1	181181413	181181422	three_prime_UTR;Wdr26;protein_coding;ENSMUSG00000038733.14	11.3257	-
chr1	181184339	181184348	three_prime_UTR;Wdr26;protein_coding;ENSMUSG00000038733.14	13.5708	-
chr1	181815381	181815390	three_prime_UTR;Lbr;protein_coding;ENSMUSG00000004880.11	91.2064	-
chr1	181815393	181815402	three_prime_UTR;Lbr;protein_coding;ENSMUSG00000004880.11	33.5806	-
chr1	181815431	181815440	three_prime_UTR;Lbr;protein_coding;ENSMUSG00000004880.11	174.188	-
chr1	181815443	181815452	three_prime_UTR;Lbr;protein_coding;ENSMUSG00000004880.11	15.4331	-
chr1	181815526	181815535	three_prime_UTR;Lbr;protein_coding;ENSMUSG00000004880.11	16.4182	-
chr1	181815598	181815607	three_prime_UTR;Lbr;protein_coding;ENSMUSG00000004880.11	32.8598	-
chr1	181815756	181815765	three_prime_UTR;Lbr;protein_coding;ENSMUSG00000004880.11	205.566	-
chr1	181815776	181815785	three_prime_UTR;Lbr;protein_coding;ENSMUSG00000004880.11	5.79176	-
chr1	181815833	181815842	three_prime_UTR;Lbr;protein_coding;ENSMUSG00000004880.11	36.1404	-
chr1	181815865	181815874	three_prime_UTR;Lbr;protein_coding;ENSMUSG00000004880.11	22.9685	-
chr1	181815883	181815892	three_prime_UTR;Lbr;protein_coding;ENSMUSG00000004880.11	96.0971	-
chr1	181815909	181815918	three_prime_UTR;Lbr;protein_coding;ENSMUSG00000004880.11	22.3384	-
chr1	181815975	181815984	three_prime_UTR;Lbr;protein_coding;ENSMUSG00000004880.11	2.78491	-
chr1	181815986	181815995	three_prime_UTR;Lbr;protein_coding;ENSMUSG00000004880.11	22.7891	-
chr1	181815998	181816007	three_prime_UTR;Lbr;protein_coding;ENSMUSG00000004880.11	115.926	-
chr1	181816008	181816017	three_prime_UTR;Lbr;protein_coding;ENSMUSG00000004880.11	2.3216	-
chr1	181816053	181816062	three_prime_UTR;Lbr;protein_coding;ENSMUSG00000004880.11	20.5673	-
chr1	181816139	181816148	three_prime_UTR;Lbr;protein_coding;ENSMUSG00000004880.11	122.037	-
chr1	181816180	181816189	three_prime_UTR;Lbr;protein_coding;ENSMUSG00000004880.11	57.7813	-
chr1	181816209	181816218	three_prime_UTR;Lbr;protein_coding;ENSMUSG00000004880.11	22.3993	-
chr1	181816264	181816273	three_prime_UTR;Lbr;protein_coding;ENSMUSG00000004880.11	62.7664	-
chr1	181816447	181816456	three_prime_UTR;Lbr;protein_coding;ENSMUSG00000004880.11	155.049	-
chr1	181816458	181816467	three_prime_UTR;Lbr;protein_coding;ENSMUSG00000004880.11	198.307	-
chr1	181816468	181816477	three_prime_UTR;Lbr;protein_coding;ENSMUSG00000004880.11	55.3863	-
chr1	181816480	181816489	three_prime_UTR;Lbr;protein_coding;ENSMUSG00000004880.11	14.0888	-
chr1	181816610	181816619	three_prime_UTR;Lbr;protein_coding;ENSMUSG00000004880.11	27.0959	-
chr1	181816701	181816710	three_prime_UTR;Lbr;protein_coding;ENSMUSG00000004880.11	6.34706	-
chr1	181816838	181816847	three_prime_UTR;Lbr;protein_coding;ENSMUSG00000004880.11	10.9926	-
chr1	181816861	181816870	CDS;Lbr;protein_coding;ENSMUSG00000004880.11	40.3147	-
chr1	181816961	181816970	CDS;Lbr;protein_coding;ENSMUSG00000004880.11	14.324	-
chr1	181817305	181817314	CDS;Lbr;protein_coding;ENSMUSG00000004880.11	16.3029	-
chr1	181817322	181817331	CDS;Lbr;protein_coding;ENSMUSG00000004880.11	37.1143	-
chr1	181817351	181817360	CDS;Lbr;protein_coding;ENSMUSG00000004880.11	2.41524	-
chr1	181817523	181817532	CDS;Lbr;protein_coding;ENSMUSG00000004880.11	3.10296	-
chr1	181817555	181817564	CDS;Lbr;protein_coding;ENSMUSG00000004880.11	34.0997	-
chr1	181817566	181817575	CDS;Lbr;protein_coding;ENSMUSG00000004880.11	21.2647	-
chr1	181818855	181818864	CDS;Lbr;protein_coding;ENSMUSG00000004880.11	5.14761	-
chr1	181818870	181818879	CDS;Lbr;protein_coding;ENSMUSG00000004880.11	8.29568	-
chr1	181819951	181819960	CDS;Lbr;protein_coding;ENSMUSG00000004880.11	43.736	-
chr1	181819974	181819983	CDS;Lbr;protein_coding;ENSMUSG00000004880.11	25.4572	-
chr1	181820675	181820684	CDS;Lbr;protein_coding;ENSMUSG00000004880.11	6.47987	-
chr1	181820699	181820708	CDS;Lbr;protein_coding;ENSMUSG00000004880.11	41.3592	-
chr1	181832574	181832583	intron;Lbr;protein_coding;ENSMUSG00000004880.11	6.85282	-
chr1	181833411	181833420	intron;Lbr;protein_coding;ENSMUSG00000004880.11	2.85932	-
chr1	181835329	181835338	intron;Lbr;protein_coding;ENSMUSG00000004880.11	6.07289	-
chr1	181835344	181835353	intron;Lbr;protein_coding;ENSMUSG00000004880.11	3.40623	-
chr1	181835359	181835368	intron;Lbr;protein_coding;ENSMUSG00000004880.11	19.0736	-
chr1	181836044	181836053	intron;Lbr;protein_coding;ENSMUSG00000004880.11	9.69548	-
chr1	181836056	181836065	intron;Lbr;protein_coding;ENSMUSG00000004880.11	5.64687	-
chr1	181836474	181836483	intron;Lbr;protein_coding;ENSMUSG00000004880.11	5.08821	-
chr1	181836490	181836499	intron;Lbr;protein_coding;ENSMUSG00000004880.11	16.8374	-
chr1	181836562	181836571	intron;Lbr;protein_coding;ENSMUSG00000004880.11	15.4609	-
chr1	181836575	181836584	intron;Lbr;protein_coding;ENSMUSG00000004880.11	19.9577	-
chr1	181836607	181836616	intron;Lbr;protein_coding;ENSMUSG00000004880.11	12.5514	-
chr1	181836967	181836976	intron;Lbr;protein_coding;ENSMUSG00000004880.11	1.65955	-
chr1	181837040	181837049	intron;Lbr;protein_coding;ENSMUSG00000004880.11	14.7884	-
chr1	181837390	181837399	intron;Lbr;protein_coding;ENSMUSG00000004880.11	1.25987	-
chr1	181837534	181837543	intron;Lbr;protein_coding;ENSMUSG00000004880.11	11.8117	-
chr1	181837559	181837568	intron;Lbr;protein_coding;ENSMUSG00000004880.11	13.7271	-
chr1	181837620	181837629	intron;Lbr;protein_coding;ENSMUSG00000004880.11	2.31986	-
chr1	181837972	181837981	intron;Lbr;protein_coding;ENSMUSG00000004880.11	37.4575	-
chr1	181838023	181838032	intron;Lbr;protein_coding;ENSMUSG00000004880.11	13.1985	-
chr1	181838037	181838046	intron;Lbr;protein_coding;ENSMUSG00000004880.11	91.497	-
chr1	181838070	181838079	intron;Lbr;protein_coding;ENSMUSG00000004880.11	3.42402	-
chr1	181838109	181838118	intron;Lbr;protein_coding;ENSMUSG00000004880.11	14.831	-
chr1	181838146	181838155	intron;Lbr;protein_coding;ENSMUSG00000004880.11	42.1364	-
chr1	181838163	181838172	intron;Lbr;protein_coding;ENSMUSG00000004880.11	12.2938	-
chr1	181838174	181838183	intron;Lbr;protein_coding;ENSMUSG00000004880.11	4.45575	-
chr1	181838351	181838360	intron;Lbr;protein_coding;ENSMUSG00000004880.11	8.15387	-
chr1	181838362	181838371	intron;Lbr;protein_coding;ENSMUSG00000004880.11	41.4187	-
chr1	181838443	181838452	CDS;Lbr;protein_coding;ENSMUSG00000004880.11	2.11483	-
chr1	181838474	181838483	CDS;Lbr;protein_coding;ENSMUSG00000004880.11	54.9632	-
chr1	181838502	181838511	CDS;Lbr;protein_coding;ENSMUSG00000004880.11	5.40284	-
chr1	181838536	181838545	CDS;Lbr;protein_coding;ENSMUSG00000004880.11	7.99367	-
chr1	181839654	181839663	intron;Lbr;protein_coding;ENSMUSG00000004880.11	3.019	-
chr1	181839713	181839722	five_prime_UTR;Lbr;protein_coding;ENSMUSG00000004880.11	14.5541	-
chr1	181842304	181842313	five_prime_UTR;Lbr;protein_coding;ENSMUSG00000004880.11	5.18413	-
chr1	181842318	181842327	five_prime_UTR;Lbr;protein_coding;ENSMUSG00000004880.11	3.91598	-
chr1	182276317	182276326	three_prime_UTR;Degs1;protein_coding;ENSMUSG00000038633.5	3.15849	-
chr1	182467549	182467558	three_prime_UTR;Capn2;protein_coding;ENSMUSG00000026509.15	7.36248	-
chr1	183327039	183327048	three_prime_UTR;Mia3;protein_coding;ENSMUSG00000056050.13	16.7034	-
chr1	183327061	183327070	three_prime_UTR;Mia3;protein_coding;ENSMUSG00000056050.13	25.1626	-
chr1	183327082	183327091	three_prime_UTR;Mia3;protein_coding;ENSMUSG00000056050.13	9.52085	-
chr1	183327229	183327238	three_prime_UTR;Mia3;protein_coding;ENSMUSG00000056050.13	64.0422	-
chr1	183338622	183338631	CDS;Mia3;protein_coding;ENSMUSG00000056050.13	16.222	-
chr1	183338654	183338663	CDS;Mia3;protein_coding;ENSMUSG00000056050.13	13.0966	-
chr1	183339382	183339391	CDS;Mia3;protein_coding;ENSMUSG00000056050.13	23.3029	-
chr1	183345194	183345203	CDS;Mia3;protein_coding;ENSMUSG00000056050.13	10.7356	-
chr1	184819309	184819318	CDS;Mtarc2;protein_coding;ENSMUSG00000073481.9	44.4806	-
chr1	184819340	184819349	CDS;Mtarc2;protein_coding;ENSMUSG00000073481.9	73.588	-
chr1	184822365	184822374	CDS;Mtarc2;protein_coding;ENSMUSG00000073481.9	13.6833	-
chr1	185286755	185286764	three_prime_UTR;Iars2;protein_coding;ENSMUSG00000026618.11	4.32481	-
chr1	185286765	185286774	three_prime_UTR;Iars2;protein_coding;ENSMUSG00000026618.11	19.317	-
chr1	185286777	185286786	three_prime_UTR;Iars2;protein_coding;ENSMUSG00000026618.11	5.03261	-
chr1	191372556	191372565	CDS;Ppp2r5a;protein_coding;ENSMUSG00000026626.11	27.7916	-
chr1	191381524	191381533	intron;Ppp2r5a;protein_coding;ENSMUSG00000026626.11	33.2486	-
chr1	191381546	191381555	intron;Ppp2r5a;protein_coding;ENSMUSG00000026626.11	43.9237	-
chr1	193222195	193222204	CDS;Hsd11b1;protein_coding;ENSMUSG00000016194.14	210.192	-
chr1	193222220	193222229	CDS;Hsd11b1;protein_coding;ENSMUSG00000016194.14	109.194	-
chr1	193223662	193223671	CDS;Hsd11b1;protein_coding;ENSMUSG00000016194.14	6.75428	-
chr10	4454860	4454869	three_prime_UTR;Armt1;protein_coding;ENSMUSG00000061759.15	39.542	+
chr10	4454890	4454899	three_prime_UTR;Armt1;protein_coding;ENSMUSG00000061759.15	137.024	+
chr10	4454905	4454914	three_prime_UTR;Armt1;protein_coding;ENSMUSG00000061759.15	327.368	+
chr10	4454933	4454942	three_prime_UTR;Armt1;protein_coding;ENSMUSG00000061759.15	81.3084	+
chr10	4454943	4454952	three_prime_UTR;Armt1;protein_coding;ENSMUSG00000061759.15	21.2078	+
chr10	4454958	4454967	three_prime_UTR;Armt1;protein_coding;ENSMUSG00000061759.15	406.321	+
chr10	4454969	4454978	three_prime_UTR;Armt1;protein_coding;ENSMUSG00000061759.15	152.732	+
chr10	6889595	6889604	three_prime_UTR;Ipcef1;protein_coding;ENSMUSG00000064065.15	2.78726	-
chr10	6889878	6889887	three_prime_UTR;Ipcef1;protein_coding;ENSMUSG00000064065.15	24.7131	-
chr10	6889968	6889977	three_prime_UTR;Ipcef1;protein_coding;ENSMUSG00000064065.15	2.20372	-
chr10	6889995	6890004	three_prime_UTR;Ipcef1;protein_coding;ENSMUSG00000064065.15	10.7875	-
chr10	6890114	6890123	three_prime_UTR;Ipcef1;protein_coding;ENSMUSG00000064065.15	39.6563	-
chr10	7440561	7440570	three_prime_UTR;Ulbp1;protein_coding;ENSMUSG00000079685.10	30.9136	-
chr10	7472309	7472318	intron;Ulbp1;protein_coding;ENSMUSG00000079685.10	5.54061	-
chr10	7472336	7472345	intron;Ulbp1;protein_coding;ENSMUSG00000079685.10	4.58628	-
chr10	7472358	7472367	intron;Ulbp1;protein_coding;ENSMUSG00000079685.10	3.17999	-
chr10	7473236	7473245	intron;Ulbp1;protein_coding;ENSMUSG00000079685.10	10.8424	-
chr10	7473263	7473272	CDS;Ulbp1;protein_coding;ENSMUSG00000079685.10	19.968	-
chr10	7869709	7869718	three_prime_UTR;Zc3h12d;protein_coding;ENSMUSG00000039981.6	8.58496	+
chr10	7869743	7869752	three_prime_UTR;Zc3h12d;protein_coding;ENSMUSG00000039981.6	6.47825	+
chr10	7869769	7869778	three_prime_UTR;Zc3h12d;protein_coding;ENSMUSG00000039981.6	22.0526	+
chr10	7869784	7869793	three_prime_UTR;Zc3h12d;protein_coding;ENSMUSG00000039981.6	55.9134	+
chr10	7869980	7869989	three_prime_UTR;Zc3h12d;protein_coding;ENSMUSG00000039981.6	4.47352	+
chr10	7870060	7870069	three_prime_UTR;Zc3h12d;protein_coding;ENSMUSG00000039981.6	4.27387	+
chr10	7870094	7870103	three_prime_UTR;Zc3h12d;protein_coding;ENSMUSG00000039981.6	10.4506	+
chr10	7870105	7870114	three_prime_UTR;Zc3h12d;protein_coding;ENSMUSG00000039981.6	74.411	+
chr10	7870116	7870125	three_prime_UTR;Zc3h12d;protein_coding;ENSMUSG00000039981.6	92.0839	+
chr10	7870128	7870137	three_prime_UTR;Zc3h12d;protein_coding;ENSMUSG00000039981.6	20.147	+
chr10	7870234	7870243	three_prime_UTR;Zc3h12d;protein_coding;ENSMUSG00000039981.6	259.893	+
chr10	7870258	7870267	three_prime_UTR;Zc3h12d;protein_coding;ENSMUSG00000039981.6	352.235	+
chr10	7870271	7870280	three_prime_UTR;Zc3h12d;protein_coding;ENSMUSG00000039981.6	34.402	+
chr10	7870284	7870293	three_prime_UTR;Zc3h12d;protein_coding;ENSMUSG00000039981.6	99.9064	+
chr10	11214316	11214325	three_prime_UTR;Shprh;protein_coding;ENSMUSG00000090112.8	2.85182	+
chr10	11214341	11214350	three_prime_UTR;Shprh;protein_coding;ENSMUSG00000090112.8	18.3341	+
chr10	11214399	11214408	three_prime_UTR;Shprh;protein_coding;ENSMUSG00000090112.8	7.34823	+
chr10	11214410	11214419	three_prime_UTR;Shprh;protein_coding;ENSMUSG00000090112.8	5.41676	+
chr10	11214442	11214451	three_prime_UTR;Shprh;protein_coding;ENSMUSG00000090112.8	8.52777	+
chr10	11214456	11214465	three_prime_UTR;Shprh;protein_coding;ENSMUSG00000090112.8	3.82114	+
chr10	12383153	12383162	three_prime_UTR;Utrn;protein_coding;ENSMUSG00000019820.11	11.3195	-
chr10	12383346	12383355	three_prime_UTR;Utrn;protein_coding;ENSMUSG00000019820.11	0.774283	-
chr10	12383576	12383585	three_prime_UTR;Utrn;protein_coding;ENSMUSG00000019820.11	9.35171	-
chr10	12383609	12383618	three_prime_UTR;Utrn;protein_coding;ENSMUSG00000019820.11	16.1144	-
chr10	12383659	12383668	three_prime_UTR;Utrn;protein_coding;ENSMUSG00000019820.11	3.68262	-
chr10	12455304	12455313	intron;Utrn;protein_coding;ENSMUSG00000019820.11	20.617	-
chr10	12600452	12600461	intron;Utrn;protein_coding;ENSMUSG00000019820.11	41.2112	-
chr10	12600475	12600484	intron;Utrn;protein_coding;ENSMUSG00000019820.11	6.61815	-
chr10	12643575	12643584	CDS;Utrn;protein_coding;ENSMUSG00000019820.11	34.2179	-
chr10	14149983	14149992	three_prime_UTR;Hivep2;protein_coding;ENSMUSG00000015501.10	25.5976	+
chr10	14150001	14150010	three_prime_UTR;Hivep2;protein_coding;ENSMUSG00000015501.10	19.0099	+
chr10	14150014	14150023	three_prime_UTR;Hivep2;protein_coding;ENSMUSG00000015501.10	13.151	+
chr10	14150224	14150233	three_prime_UTR;Hivep2;protein_coding;ENSMUSG00000015501.10	18.0385	+
chr10	14150608	14150617	three_prime_UTR;Hivep2;protein_coding;ENSMUSG00000015501.10	12.6525	+
chr10	14150626	14150635	three_prime_UTR;Hivep2;protein_coding;ENSMUSG00000015501.10	64.3979	+
chr10	14150644	14150653	three_prime_UTR;Hivep2;protein_coding;ENSMUSG00000015501.10	28.6707	+
chr10	14150768	14150777	three_prime_UTR;Hivep2;protein_coding;ENSMUSG00000015501.10	23.3907	+
chr10	14151154	14151163	three_prime_UTR;Hivep2;protein_coding;ENSMUSG00000015501.10	7.83994	+
chr10	14151173	14151182	three_prime_UTR;Hivep2;protein_coding;ENSMUSG00000015501.10	7.63487	+
chr10	17901421	17901430	three_prime_UTR;Heca;protein_coding;ENSMUSG00000039879.9	28.3573	-
chr10	18011547	18011556	three_prime_UTR;Abracl;protein_coding;ENSMUSG00000078453.3	12.9745	-
chr10	19001786	19001795	three_prime_UTR;Tnfaip3;protein_coding;ENSMUSG00000019850.11	2.39362	-
chr10	19001800	19001809	three_prime_UTR;Tnfaip3;protein_coding;ENSMUSG00000019850.11	26.2299	-
chr10	19001818	19001827	three_prime_UTR;Tnfaip3;protein_coding;ENSMUSG00000019850.11	18.5092	-
chr10	19001867	19001876	three_prime_UTR;Tnfaip3;protein_coding;ENSMUSG00000019850.11	79.8891	-
chr10	19001880	19001889	three_prime_UTR;Tnfaip3;protein_coding;ENSMUSG00000019850.11	116.163	-
chr10	19001896	19001905	three_prime_UTR;Tnfaip3;protein_coding;ENSMUSG00000019850.11	23.4996	-
chr10	19001911	19001920	three_prime_UTR;Tnfaip3;protein_coding;ENSMUSG00000019850.11	10.5988	-
chr10	19606286	19606295	three_prime_UTR;Ifngr1;protein_coding;ENSMUSG00000020009.13	1.25156	+
chr10	19609776	19609785	three_prime_UTR;Ifngr1;protein_coding;ENSMUSG00000020009.13	7.72387	+
chr10	19610085	19610094	three_prime_UTR;Ifngr1;protein_coding;ENSMUSG00000020009.13	31.3134	+
chr10	19610106	19610115	three_prime_UTR;Ifngr1;protein_coding;ENSMUSG00000020009.13	1.00911	+
chr10	19610173	19610182	three_prime_UTR;Ifngr1;protein_coding;ENSMUSG00000020009.13	151.514	+
chr10	20141890	20141899	three_prime_UTR;Map3k5;protein_coding;ENSMUSG00000071369.11	1.95614	+
chr10	20141912	20141921	three_prime_UTR;Map3k5;protein_coding;ENSMUSG00000071369.11	5.88245	+
chr10	20141987	20141996	three_prime_UTR;Map3k5;protein_coding;ENSMUSG00000071369.11	7.03107	+
chr10	20142022	20142031	three_prime_UTR;Map3k5;protein_coding;ENSMUSG00000071369.11	6.90318	+
chr10	20142071	20142080	three_prime_UTR;Map3k5;protein_coding;ENSMUSG00000071369.11	72.0245	+
chr10	20142171	20142180	three_prime_UTR;Map3k5;protein_coding;ENSMUSG00000071369.11	49.5278	+
chr10	20142183	20142192	three_prime_UTR;Map3k5;protein_coding;ENSMUSG00000071369.11	52.6281	+
chr10	20142204	20142213	three_prime_UTR;Map3k5;protein_coding;ENSMUSG00000071369.11	93.5394	+
chr10	20142214	20142223	three_prime_UTR;Map3k5;protein_coding;ENSMUSG00000071369.11	274.315	+
chr10	20280981	20280990	three_prime_UTR;Map7;protein_coding;ENSMUSG00000019996.17	1.56932	+
chr10	20281019	20281028	three_prime_UTR;Map7;protein_coding;ENSMUSG00000019996.17	25.6195	+
chr10	20281042	20281051	three_prime_UTR;Map7;protein_coding;ENSMUSG00000019996.17	7.31039	+
chr10	20281074	20281083	three_prime_UTR;Map7;protein_coding;ENSMUSG00000019996.17	25.9785	+
chr10	21125582	21125591	three_prime_UTR;Myb;protein_coding;ENSMUSG00000019982.15	53.1329	-
chr10	21139395	21139404	CDS;Myb;protein_coding;ENSMUSG00000019982.15	26.7217	-
chr10	21140627	21140636	CDS;Myb;protein_coding;ENSMUSG00000019982.15	20.4453	-
chr10	21999302	21999311	three_prime_UTR;Sgk1;protein_coding;ENSMUSG00000019970.15	2.29558	+
chr10	21999384	21999393	three_prime_UTR;Sgk1;protein_coding;ENSMUSG00000019970.15	56.3466	+
chr10	21999431	21999440	three_prime_UTR;Sgk1;protein_coding;ENSMUSG00000019970.15	482.972	+
chr10	21999497	21999506	three_prime_UTR;Sgk1;protein_coding;ENSMUSG00000019970.15	41.4446	+
chr10	21999519	21999528	three_prime_UTR;Sgk1;protein_coding;ENSMUSG00000019970.15	21.7699	+
chr10	21999564	21999573	three_prime_UTR;Sgk1;protein_coding;ENSMUSG00000019970.15	27.8872	+
chr10	21999603	21999612	three_prime_UTR;Sgk1;protein_coding;ENSMUSG00000019970.15	114.199	+
chr10	21999653	21999662	three_prime_UTR;Sgk1;protein_coding;ENSMUSG00000019970.15	125.069	+
chr10	21999682	21999691	three_prime_UTR;Sgk1;protein_coding;ENSMUSG00000019970.15	171.621	+
chr10	21999775	21999784	three_prime_UTR;Sgk1;protein_coding;ENSMUSG00000019970.15	9.35904	+
chr10	21999787	21999796	three_prime_UTR;Sgk1;protein_coding;ENSMUSG00000019970.15	26.3129	+
chr10	21999839	21999848	three_prime_UTR;Sgk1;protein_coding;ENSMUSG00000019970.15	23.9186	+
chr10	22704869	22704878	three_prime_UTR;Tbpl1;protein_coding;ENSMUSG00000071359.13	67.9811	-
chr10	22704884	22704893	three_prime_UTR;Tbpl1;protein_coding;ENSMUSG00000071359.13	40.8505	-
chr10	22704894	22704903	three_prime_UTR;Tbpl1;protein_coding;ENSMUSG00000071359.13	2.74933	-
chr10	22704914	22704923	three_prime_UTR;Tbpl1;protein_coding;ENSMUSG00000071359.13	5.34528	-
chr10	24912864	24912873	three_prime_UTR;Med23;protein_coding;ENSMUSG00000019984.16	44.4562	+
chr10	24912921	24912930	three_prime_UTR;Med23;protein_coding;ENSMUSG00000019984.16	235.49	+
chr10	24912933	24912942	three_prime_UTR;Med23;protein_coding;ENSMUSG00000019984.16	4.7782	+
chr10	24912983	24912992	three_prime_UTR;Med23;protein_coding;ENSMUSG00000019984.16	193.85	+
chr10	24913101	24913110	three_prime_UTR;Med23;protein_coding;ENSMUSG00000019984.16	11.2646	+
chr10	24913152	24913161	three_prime_UTR;Med23;protein_coding;ENSMUSG00000019984.16	13.0879	+
chr10	24913201	24913210	three_prime_UTR;Med23;protein_coding;ENSMUSG00000019984.16	2.93475	+
chr10	24913214	24913223	three_prime_UTR;Med23;protein_coding;ENSMUSG00000019984.16	4.40168	+
chr10	34153334	34153343	CDS;Dse;protein_coding;ENSMUSG00000039497.8	29.6927	-
chr10	34153370	34153379	CDS;Dse;protein_coding;ENSMUSG00000039497.8	16.1431	-
chr10	34303666	34303675	three_prime_UTR;Nt5dc1;protein_coding;ENSMUSG00000039480.14	26.6572	-
chr10	37001745	37001754	three_prime_UTR;Hdac2;protein_coding;ENSMUSG00000019777.16	2.20115	+
chr10	37001786	37001795	three_prime_UTR;Hdac2;protein_coding;ENSMUSG00000019777.16	3.70869	+
chr10	39564123	39564132	three_prime_UTR;Fyn;protein_coding;ENSMUSG00000019843.14	16.8973	+
chr10	39564136	39564145	three_prime_UTR;Fyn;protein_coding;ENSMUSG00000019843.14	0.461526	+
chr10	39564178	39564187	three_prime_UTR;Fyn;protein_coding;ENSMUSG00000019843.14	22.1205	+
chr10	39564212	39564221	three_prime_UTR;Fyn;protein_coding;ENSMUSG00000019843.14	4.77377	+
chr10	40287990	40287999	three_prime_UTR;Amd1;protein_coding;ENSMUSG00000075232.6	126.774	-
chr10	40451721	40451730	intron;Cdk19;protein_coding;ENSMUSG00000038481.13	59.0017	+
chr10	40451809	40451818	intron;Cdk19;protein_coding;ENSMUSG00000038481.13	3.73186	+
chr10	40453405	40453414	intron;Cdk19;protein_coding;ENSMUSG00000038481.13	31.5154	+
chr10	40831698	40831707	three_prime_UTR;Cdc40;protein_coding;ENSMUSG00000038446.8	7.34522	-
chr10	41528998	41529007	three_prime_UTR;Cd164;protein_coding;ENSMUSG00000019818.15	2.85889	+
chr10	41529096	41529105	three_prime_UTR;Cd164;protein_coding;ENSMUSG00000019818.15	0.928976	+
chr10	41529124	41529133	three_prime_UTR;Cd164;protein_coding;ENSMUSG00000019818.15	27.1157	+
chr10	41530045	41530054	three_prime_UTR;Cd164;protein_coding;ENSMUSG00000019818.15	1.56296	+
chr10	41530272	41530281	three_prime_UTR;Cd164;protein_coding;ENSMUSG00000019818.15	5.51933	+
chr10	41530290	41530299	three_prime_UTR;Cd164;protein_coding;ENSMUSG00000019818.15	39.2642	+
chr10	41530319	41530328	three_prime_UTR;Cd164;protein_coding;ENSMUSG00000019818.15	61.9114	+
chr10	41530357	41530366	three_prime_UTR;Cd164;protein_coding;ENSMUSG00000019818.15	3.23638	+
chr10	41530781	41530790	three_prime_UTR;Cd164;protein_coding;ENSMUSG00000019818.15	11.1851	+
chr10	41530823	41530832	three_prime_UTR;Cd164;protein_coding;ENSMUSG00000019818.15	31.4416	+
chr10	41530839	41530848	three_prime_UTR;Cd164;protein_coding;ENSMUSG00000019818.15	6.27776	+
chr10	41530858	41530867	three_prime_UTR;Cd164;protein_coding;ENSMUSG00000019818.15	30.9708	+
chr10	41530887	41530896	three_prime_UTR;Cd164;protein_coding;ENSMUSG00000019818.15	5.60479	+
chr10	41811226	41811235	CDS;Sesn1;protein_coding;ENSMUSG00000038332.13	8.47346	+
chr10	41894927	41894936	CDS;Sesn1;protein_coding;ENSMUSG00000038332.13	20.6345	+
chr10	41894938	41894947	CDS;Sesn1;protein_coding;ENSMUSG00000038332.13	46.4214	+
chr10	41894949	41894958	CDS;Sesn1;protein_coding;ENSMUSG00000038332.13	9.38276	+
chr10	41896075	41896084	CDS;Sesn1;protein_coding;ENSMUSG00000038332.13	21.8974	+
chr10	41903758	41903767	CDS;Sesn1;protein_coding;ENSMUSG00000038332.13	41.0902	+
chr10	41905356	41905365	CDS;Sesn1;protein_coding;ENSMUSG00000038332.13	24.2184	+
chr10	41906425	41906434	CDS;Sesn1;protein_coding;ENSMUSG00000038332.13	28.4958	+
chr10	41906438	41906447	CDS;Sesn1;protein_coding;ENSMUSG00000038332.13	397.168	+
chr10	41907478	41907487	three_prime_UTR;Sesn1;protein_coding;ENSMUSG00000038332.13	10.2516	+
chr10	41907493	41907502	three_prime_UTR;Sesn1;protein_coding;ENSMUSG00000038332.13	26.5569	+
chr10	41907519	41907528	three_prime_UTR;Sesn1;protein_coding;ENSMUSG00000038332.13	15.9784	+
chr10	41907547	41907556	three_prime_UTR;Sesn1;protein_coding;ENSMUSG00000038332.13	22.2299	+
chr10	41907559	41907568	three_prime_UTR;Sesn1;protein_coding;ENSMUSG00000038332.13	2.26079	+
chr10	41907590	41907599	three_prime_UTR;Sesn1;protein_coding;ENSMUSG00000038332.13	8.43593	+
chr10	41907692	41907701	three_prime_UTR;Sesn1;protein_coding;ENSMUSG00000038332.13	56.3982	+
chr10	41907731	41907740	three_prime_UTR;Sesn1;protein_coding;ENSMUSG00000038332.13	15.6696	+
chr10	41907778	41907787	three_prime_UTR;Sesn1;protein_coding;ENSMUSG00000038332.13	14.9116	+
chr10	41907794	41907803	three_prime_UTR;Sesn1;protein_coding;ENSMUSG00000038332.13	0.96576	+
chr10	41907825	41907834	three_prime_UTR;Sesn1;protein_coding;ENSMUSG00000038332.13	2.00352	+
chr10	41907928	41907937	three_prime_UTR;Sesn1;protein_coding;ENSMUSG00000038332.13	16.3249	+
chr10	41907979	41907988	three_prime_UTR;Sesn1;protein_coding;ENSMUSG00000038332.13	3.28403	+
chr10	41908029	41908038	three_prime_UTR;Sesn1;protein_coding;ENSMUSG00000038332.13	5.25799	+
chr10	41908058	41908067	three_prime_UTR;Sesn1;protein_coding;ENSMUSG00000038332.13	5.02005	+
chr10	41908150	41908159	three_prime_UTR;Sesn1;protein_coding;ENSMUSG00000038332.13	14.82	+
chr10	41908211	41908220	three_prime_UTR;Sesn1;protein_coding;ENSMUSG00000038332.13	21.222	+
chr10	52338344	52338353	three_prime_UTR;Gopc;protein_coding;ENSMUSG00000019861.15	6.44263	-
chr10	52338670	52338679	three_prime_UTR;Gopc;protein_coding;ENSMUSG00000019861.15	18.3533	-
chr10	52338685	52338694	three_prime_UTR;Gopc;protein_coding;ENSMUSG00000019861.15	31.0423	-
chr10	52338703	52338712	three_prime_UTR;Gopc;protein_coding;ENSMUSG00000019861.15	1.67968	-
chr10	52338715	52338724	three_prime_UTR;Gopc;protein_coding;ENSMUSG00000019861.15	17.0636	-
chr10	52436877	52436886	three_prime_UTR;Nus1;protein_coding;ENSMUSG00000023068.16	0.866501	+
chr10	52436973	52436982	three_prime_UTR;Nus1;protein_coding;ENSMUSG00000023068.16	8.7712	+
chr10	52437333	52437342	three_prime_UTR;Nus1;protein_coding;ENSMUSG00000023068.16	15.4731	+
chr10	52437372	52437381	three_prime_UTR;Nus1;protein_coding;ENSMUSG00000023068.16	1.59682	+
chr10	53602360	53602369	five_prime_UTR;Asf1a;protein_coding;ENSMUSG00000019857.7	18.7302	+
chr10	53602385	53602394	five_prime_UTR;Asf1a;protein_coding;ENSMUSG00000019857.7	15.1285	+
chr10	53602411	53602420	five_prime_UTR;Asf1a;protein_coding;ENSMUSG00000019857.7	54.7865	+
chr10	53904920	53904929	three_prime_UTR;Man1a;protein_coding;ENSMUSG00000003746.16	2.85527	-
chr10	53904985	53904994	three_prime_UTR;Man1a;protein_coding;ENSMUSG00000003746.16	5.25744	-
chr10	53905016	53905025	three_prime_UTR;Man1a;protein_coding;ENSMUSG00000003746.16	10.7167	-
chr10	53905076	53905085	three_prime_UTR;Man1a;protein_coding;ENSMUSG00000003746.16	3.71825	-
chr10	53905112	53905121	three_prime_UTR;Man1a;protein_coding;ENSMUSG00000003746.16	6.24684	-
chr10	53905307	53905316	three_prime_UTR;Man1a;protein_coding;ENSMUSG00000003746.16	5.309	-
chr10	53905326	53905335	three_prime_UTR;Man1a;protein_coding;ENSMUSG00000003746.16	19.0832	-
chr10	53905358	53905367	three_prime_UTR;Man1a;protein_coding;ENSMUSG00000003746.16	10.1648	-
chr10	53905375	53905384	three_prime_UTR;Man1a;protein_coding;ENSMUSG00000003746.16	19.2078	-
chr10	53905421	53905430	three_prime_UTR;Man1a;protein_coding;ENSMUSG00000003746.16	13.6489	-
chr10	53905467	53905476	three_prime_UTR;Man1a;protein_coding;ENSMUSG00000003746.16	18.1708	-
chr10	53905584	53905593	three_prime_UTR;Man1a;protein_coding;ENSMUSG00000003746.16	13.8442	-
chr10	53905595	53905604	three_prime_UTR;Man1a;protein_coding;ENSMUSG00000003746.16	17.7217	-
chr10	53905634	53905643	three_prime_UTR;Man1a;protein_coding;ENSMUSG00000003746.16	61.097	-
chr10	53905684	53905693	three_prime_UTR;Man1a;protein_coding;ENSMUSG00000003746.16	1.9324	-
chr10	53905725	53905734	three_prime_UTR;Man1a;protein_coding;ENSMUSG00000003746.16	48.2614	-
chr10	53905814	53905823	three_prime_UTR;Man1a;protein_coding;ENSMUSG00000003746.16	28.8774	-
chr10	53905914	53905923	three_prime_UTR;Man1a;protein_coding;ENSMUSG00000003746.16	22.358	-
chr10	53905933	53905942	three_prime_UTR;Man1a;protein_coding;ENSMUSG00000003746.16	33.0138	-
chr10	53905976	53905985	three_prime_UTR;Man1a;protein_coding;ENSMUSG00000003746.16	17.6288	-
chr10	53906144	53906153	three_prime_UTR;Man1a;protein_coding;ENSMUSG00000003746.16	114.131	-
chr10	53906181	53906190	three_prime_UTR;Man1a;protein_coding;ENSMUSG00000003746.16	21.2922	-
chr10	53906250	53906259	three_prime_UTR;Man1a;protein_coding;ENSMUSG00000003746.16	46.5187	-
chr10	53906267	53906276	three_prime_UTR;Man1a;protein_coding;ENSMUSG00000003746.16	18.9394	-
chr10	53906297	53906306	three_prime_UTR;Man1a;protein_coding;ENSMUSG00000003746.16	23.9726	-
chr10	53906349	53906358	three_prime_UTR;Man1a;protein_coding;ENSMUSG00000003746.16	48.2493	-
chr10	53906387	53906396	three_prime_UTR;Man1a;protein_coding;ENSMUSG00000003746.16	7.41909	-
chr10	53906482	53906491	three_prime_UTR;Man1a;protein_coding;ENSMUSG00000003746.16	5.66827	-
chr10	53906499	53906508	three_prime_UTR;Man1a;protein_coding;ENSMUSG00000003746.16	7.43144	-
chr10	53906574	53906583	three_prime_UTR;Man1a;protein_coding;ENSMUSG00000003746.16	9.55779	-
chr10	53906622	53906631	three_prime_UTR;Man1a;protein_coding;ENSMUSG00000003746.16	22.6551	-
chr10	53906692	53906701	three_prime_UTR;Man1a;protein_coding;ENSMUSG00000003746.16	31.9038	-
chr10	53906758	53906767	three_prime_UTR;Man1a;protein_coding;ENSMUSG00000003746.16	37.0811	-
chr10	53906768	53906777	three_prime_UTR;Man1a;protein_coding;ENSMUSG00000003746.16	67.5999	-
chr10	53906850	53906859	three_prime_UTR;Man1a;protein_coding;ENSMUSG00000003746.16	12.4984	-
chr10	53906918	53906927	three_prime_UTR;Man1a;protein_coding;ENSMUSG00000003746.16	55.1972	-
chr10	53906933	53906942	three_prime_UTR;Man1a;protein_coding;ENSMUSG00000003746.16	59.9996	-
chr10	53906985	53906994	three_prime_UTR;Man1a;protein_coding;ENSMUSG00000003746.16	146.684	-
chr10	53907070	53907079	three_prime_UTR;Man1a;protein_coding;ENSMUSG00000003746.16	58.1648	-
chr10	53907085	53907094	three_prime_UTR;Man1a;protein_coding;ENSMUSG00000003746.16	1156.77	-
chr10	53907097	53907106	three_prime_UTR;Man1a;protein_coding;ENSMUSG00000003746.16	597.832	-
chr10	53907108	53907117	three_prime_UTR;Man1a;protein_coding;ENSMUSG00000003746.16	427.366	-
chr10	53907127	53907136	three_prime_UTR;Man1a;protein_coding;ENSMUSG00000003746.16	1033.44	-
chr10	53907224	53907233	three_prime_UTR;Man1a;protein_coding;ENSMUSG00000003746.16	23.344	-
chr10	53907248	53907257	three_prime_UTR;Man1a;protein_coding;ENSMUSG00000003746.16	217.478	-
chr10	53907285	53907294	three_prime_UTR;Man1a;protein_coding;ENSMUSG00000003746.16	169.133	-
chr10	53907344	53907353	three_prime_UTR;Man1a;protein_coding;ENSMUSG00000003746.16	66.251	-
chr10	53907375	53907384	three_prime_UTR;Man1a;protein_coding;ENSMUSG00000003746.16	17.4496	-
chr10	53907386	53907395	three_prime_UTR;Man1a;protein_coding;ENSMUSG00000003746.16	4.28624	-
chr10	53907418	53907427	three_prime_UTR;Man1a;protein_coding;ENSMUSG00000003746.16	1.61323	-
chr10	53907482	53907491	three_prime_UTR;Man1a;protein_coding;ENSMUSG00000003746.16	13.8419	-
chr10	53907502	53907511	three_prime_UTR;Man1a;protein_coding;ENSMUSG00000003746.16	4.18367	-
chr10	53907542	53907551	three_prime_UTR;Man1a;protein_coding;ENSMUSG00000003746.16	42.8005	-
chr10	53907554	53907563	three_prime_UTR;Man1a;protein_coding;ENSMUSG00000003746.16	37.1884	-
chr10	53907981	53907990	three_prime_UTR;Man1a;protein_coding;ENSMUSG00000003746.16	23.9148	-
chr10	53908011	53908020	three_prime_UTR;Man1a;protein_coding;ENSMUSG00000003746.16	3.12117	-
chr10	53908045	53908054	three_prime_UTR;Man1a;protein_coding;ENSMUSG00000003746.16	28.9185	-
chr10	53919196	53919205	three_prime_UTR;Man1a;protein_coding;ENSMUSG00000003746.16	1.97746	-
chr10	53919209	53919218	three_prime_UTR;Man1a;protein_coding;ENSMUSG00000003746.16	5.34837	-
chr10	53919301	53919310	three_prime_UTR;Man1a;protein_coding;ENSMUSG00000003746.16	6.75132	-
chr10	53920140	53920149	three_prime_UTR;Man1a;protein_coding;ENSMUSG00000003746.16	29.8805	-
chr10	53933504	53933513	three_prime_UTR;Man1a;protein_coding;ENSMUSG00000003746.16	9.32041	-
chr10	53933568	53933577	CDS;Man1a;protein_coding;ENSMUSG00000003746.16	25.7237	-
chr10	53977028	53977037	CDS;Man1a;protein_coding;ENSMUSG00000003746.16	23.0633	-
chr10	53977045	53977054	CDS;Man1a;protein_coding;ENSMUSG00000003746.16	4.55249	-
chr10	54011186	54011195	intron;Man1a;protein_coding;ENSMUSG00000003746.16	14.1555	-
chr10	54011424	54011433	intron;Man1a;protein_coding;ENSMUSG00000003746.16	12.8171	-
chr10	54014438	54014447	CDS;Man1a;protein_coding;ENSMUSG00000003746.16	6.40519	-
chr10	54014451	54014460	CDS;Man1a;protein_coding;ENSMUSG00000003746.16	3.43465	-
chr10	54014473	54014482	CDS;Man1a;protein_coding;ENSMUSG00000003746.16	36.0601	-
chr10	54014489	54014498	CDS;Man1a;protein_coding;ENSMUSG00000003746.16	12.4587	-
chr10	54025756	54025765	CDS;Man1a;protein_coding;ENSMUSG00000003746.16	1.6207	-
chr10	54030723	54030732	CDS;Man1a;protein_coding;ENSMUSG00000003746.16	11.7254	-
chr10	54030756	54030765	CDS;Man1a;protein_coding;ENSMUSG00000003746.16	10.5108	-
chr10	54030767	54030776	CDS;Man1a;protein_coding;ENSMUSG00000003746.16	33.4617	-
chr10	54046150	54046159	intron;Man1a;protein_coding;ENSMUSG00000003746.16	4.12809	-
chr10	57517138	57517147	three_prime_UTR;Serinc1;protein_coding;ENSMUSG00000019877.10	58.1162	-
chr10	57807508	57807517	CDS;Smpdl3a;protein_coding;ENSMUSG00000019872.13	12.0768	+
chr10	58455280	58455289	CDS;Ranbp2;protein_coding;ENSMUSG00000003226.7	27.0236	+
chr10	58494152	58494161	three_prime_UTR;Ranbp2;protein_coding;ENSMUSG00000003226.7	1.53629	+
chr10	58494185	58494194	three_prime_UTR;Ranbp2;protein_coding;ENSMUSG00000003226.7	38.6946	+
chr10	59371595	59371604	three_prime_UTR;P4ha1;protein_coding;ENSMUSG00000019916.14	21.3001	+
chr10	59949715	59949724	three_prime_UTR;Ddit4;protein_coding;ENSMUSG00000020108.4	21.6204	-
chr10	59949749	59949758	three_prime_UTR;Ddit4;protein_coding;ENSMUSG00000020108.4	827.539	-
chr10	59949759	59949768	three_prime_UTR;Ddit4;protein_coding;ENSMUSG00000020108.4	232.155	-
chr10	59949774	59949783	three_prime_UTR;Ddit4;protein_coding;ENSMUSG00000020108.4	5.06131	-
chr10	59949804	59949813	three_prime_UTR;Ddit4;protein_coding;ENSMUSG00000020108.4	79.2592	-
chr10	59949909	59949918	three_prime_UTR;Ddit4;protein_coding;ENSMUSG00000020108.4	2.18885	-
chr10	59950088	59950097	three_prime_UTR;Ddit4;protein_coding;ENSMUSG00000020108.4	16.8205	-
chr10	59950222	59950231	three_prime_UTR;Ddit4;protein_coding;ENSMUSG00000020108.4	45.2394	-
chr10	59950337	59950346	three_prime_UTR;Ddit4;protein_coding;ENSMUSG00000020108.4	108.932	-
chr10	59950500	59950509	three_prime_UTR;Ddit4;protein_coding;ENSMUSG00000020108.4	112.213	-
chr10	59951487	59951496	CDS;Ddit4;protein_coding;ENSMUSG00000020108.4	4.4752	-
chr10	59951798	59951807	five_prime_UTR;Ddit4;protein_coding;ENSMUSG00000020108.4	4.17214	-
chr10	59951831	59951840	five_prime_UTR;Ddit4;protein_coding;ENSMUSG00000020108.4	174.22	-
chr10	60302266	60302275	three_prime_UTR;Psap;protein_coding;ENSMUSG00000004207.14	44.2379	+
chr10	60302279	60302288	three_prime_UTR;Psap;protein_coding;ENSMUSG00000004207.14	26.3252	+
chr10	60302330	60302339	three_prime_UTR;Psap;protein_coding;ENSMUSG00000004207.14	22.9302	+
chr10	61428686	61428695	three_prime_UTR;Eif4ebp2;protein_coding;ENSMUSG00000020091.15	7.60374	-
chr10	61428725	61428734	three_prime_UTR;Eif4ebp2;protein_coding;ENSMUSG00000020091.15	105.734	-
chr10	61428756	61428765	three_prime_UTR;Eif4ebp2;protein_coding;ENSMUSG00000020091.15	16.8524	-
chr10	61428775	61428784	three_prime_UTR;Eif4ebp2;protein_coding;ENSMUSG00000020091.15	6.6747	-
chr10	61431797	61431806	three_prime_UTR;Eif4ebp2;protein_coding;ENSMUSG00000020091.15	11.6643	-
chr10	61431888	61431897	three_prime_UTR;Eif4ebp2;protein_coding;ENSMUSG00000020091.15	17.1724	-
chr10	61431992	61432001	three_prime_UTR;Eif4ebp2;protein_coding;ENSMUSG00000020091.15	62.0845	-
chr10	61432640	61432649	three_prime_UTR;Eif4ebp2;protein_coding;ENSMUSG00000020091.15	5.19441	-
chr10	61432674	61432683	three_prime_UTR;Eif4ebp2;protein_coding;ENSMUSG00000020091.15	13.0233	-
chr10	61433121	61433130	three_prime_UTR;Eif4ebp2;protein_coding;ENSMUSG00000020091.15	80.9692	-
chr10	61674095	61674104	three_prime_UTR;Ppa1;protein_coding;ENSMUSG00000020089.8	12.8738	+
chr10	62494555	62494564	three_prime_UTR;Srgn;protein_coding;ENSMUSG00000020077.14	30.2085	-
chr10	62494595	62494604	three_prime_UTR;Srgn;protein_coding;ENSMUSG00000020077.14	6.85376	-
chr10	62744260	62744269	three_prime_UTR;Ccar1;protein_coding;ENSMUSG00000020074.7	15.7387	-
chr10	62744568	62744577	three_prime_UTR;Ccar1;protein_coding;ENSMUSG00000020074.7	40.8106	-
chr10	62945851	62945860	three_prime_UTR;Slc25a16;protein_coding;ENSMUSG00000071253.8	41.1102	+
chr10	62945862	62945871	three_prime_UTR;Slc25a16;protein_coding;ENSMUSG00000071253.8	10.4304	+
chr10	67547235	67547244	three_prime_UTR;Ado;protein_coding;ENSMUSG00000057134.6	4.32723	-
chr10	67547268	67547277	three_prime_UTR;Ado;protein_coding;ENSMUSG00000057134.6	38.6389	-
chr10	76351681	76351690	three_prime_UTR;Pcnt;protein_coding;ENSMUSG00000001151.10	1.80695	-
chr10	76351696	76351705	three_prime_UTR;Pcnt;protein_coding;ENSMUSG00000001151.10	15.5409	-
chr10	76553339	76553348	three_prime_UTR;Lss;protein_coding;ENSMUSG00000033105.12	34.0771	+
chr10	77547268	77547277	three_prime_UTR;Itgb2;protein_coding;ENSMUSG00000000290.13	24.5126	+
chr10	77547279	77547288	three_prime_UTR;Itgb2;protein_coding;ENSMUSG00000000290.13	2.75313	+
chr10	77645444	77645453	three_prime_UTR;Ube2g2;protein_coding;ENSMUSG00000009293.17	16.2003	+
chr10	77645454	77645463	three_prime_UTR;Ube2g2;protein_coding;ENSMUSG00000009293.17	22.3927	+
chr10	77645471	77645480	three_prime_UTR;Ube2g2;protein_coding;ENSMUSG00000009293.17	26.285	+
chr10	78187487	78187496	three_prime_UTR;Trappc10;protein_coding;ENSMUSG00000000374.8	10.0089	-
chr10	78187504	78187513	three_prime_UTR;Trappc10;protein_coding;ENSMUSG00000000374.8	20.4359	-
chr10	78187522	78187531	three_prime_UTR;Trappc10;protein_coding;ENSMUSG00000000374.8	23.6219	-
chr10	78187539	78187548	three_prime_UTR;Trappc10;protein_coding;ENSMUSG00000000374.8	19.9988	-
chr10	78187641	78187650	three_prime_UTR;Trappc10;protein_coding;ENSMUSG00000000374.8	141.608	-
chr10	78199075	78199084	CDS;Trappc10;protein_coding;ENSMUSG00000000374.8	10.1949	-
chr10	79910325	79910334	three_prime_UTR;R3hdm4;protein_coding;ENSMUSG00000035781.14	20.0249	-
chr10	79994950	79994959	three_prime_UTR;Cnn2;protein_coding;ENSMUSG00000004665.10	24.9797	+
chr10	79994962	79994971	three_prime_UTR;Cnn2;protein_coding;ENSMUSG00000004665.10	2.52327	+
chr10	79994975	79994984	three_prime_UTR;Cnn2;protein_coding;ENSMUSG00000004665.10	30.1949	+
chr10	79994988	79994997	three_prime_UTR;Cnn2;protein_coding;ENSMUSG00000004665.10	1.3511	+
chr10	80036027	80036036	three_prime_UTR;Polr2e;protein_coding;ENSMUSG00000004667.18	42.0639	-
chr10	80036039	80036048	three_prime_UTR;Polr2e;protein_coding;ENSMUSG00000004667.18	4.13445	-
chr10	80036070	80036079	three_prime_UTR;Polr2e;protein_coding;ENSMUSG00000004667.18	30.2042	-
chr10	80157622	80157631	three_prime_UTR;Midn;protein_coding;ENSMUSG00000035621.13	30.414	+
chr10	80157701	80157710	three_prime_UTR;Midn;protein_coding;ENSMUSG00000035621.13	26.5549	+
chr10	80157730	80157739	three_prime_UTR;Midn;protein_coding;ENSMUSG00000035621.13	6.15785	+
chr10	81149702	81149711	three_prime_UTR;Zbtb7a;protein_coding;ENSMUSG00000035011.15	42.116	+
chr10	82749006	82749015	three_prime_UTR;Nfyb;protein_coding;ENSMUSG00000020248.18	16.822	-
chr10	82749889	82749898	three_prime_UTR;Nfyb;protein_coding;ENSMUSG00000020248.18	3.6839	-
chr10	82749931	82749940	three_prime_UTR;Nfyb;protein_coding;ENSMUSG00000020248.18	9.11737	-
chr10	82749960	82749969	three_prime_UTR;Nfyb;protein_coding;ENSMUSG00000020248.18	13.6159	-
chr10	82750098	82750107	three_prime_UTR;Nfyb;protein_coding;ENSMUSG00000020248.18	21.3832	-
chr10	82750109	82750118	three_prime_UTR;Nfyb;protein_coding;ENSMUSG00000020248.18	30.4579	-
chr10	82750127	82750136	three_prime_UTR;Nfyb;protein_coding;ENSMUSG00000020248.18	30.4669	-
chr10	82750147	82750156	three_prime_UTR;Nfyb;protein_coding;ENSMUSG00000020248.18	10.9677	-
chr10	82750166	82750175	three_prime_UTR;Nfyb;protein_coding;ENSMUSG00000020248.18	16.9935	-
chr10	83366358	83366367	three_prime_UTR;D10Wsu102e;protein_coding;ENSMUSG00000020255.8	14.6488	+
chr10	83366392	83366401	three_prime_UTR;D10Wsu102e;protein_coding;ENSMUSG00000020255.8	62.7171	+
chr10	83366402	83366411	three_prime_UTR;D10Wsu102e;protein_coding;ENSMUSG00000020255.8	4.29881	+
chr10	83366419	83366428	three_prime_UTR;D10Wsu102e;protein_coding;ENSMUSG00000020255.8	2.94991	+
chr10	83366472	83366481	three_prime_UTR;D10Wsu102e;protein_coding;ENSMUSG00000020255.8	1.08073	+
chr10	83546872	83546881	CDS;Washc4;protein_coding;ENSMUSG00000034560.6	67.2142	+
chr10	85888636	85888645	three_prime_UTR;Pwp1;protein_coding;ENSMUSG00000001785.13	88.0672	+
chr10	85888692	85888701	three_prime_UTR;Pwp1;protein_coding;ENSMUSG00000001785.13	183.425	+
chr10	85888771	85888780	three_prime_UTR;Pwp1;protein_coding;ENSMUSG00000001785.13	2.72007	+
chr10	85888796	85888805	three_prime_UTR;Pwp1;protein_coding;ENSMUSG00000001785.13	7.02373	+
chr10	85892031	85892040	three_prime_UTR;Prdm4;protein_coding;ENSMUSG00000035529.10	41.5653	-
chr10	85892048	85892057	three_prime_UTR;Prdm4;protein_coding;ENSMUSG00000035529.10	4.2358	-
chr10	86690935	86690944	three_prime_UTR;Hsp90b1;protein_coding;ENSMUSG00000020048.13	20.6203	-
chr10	86690971	86690980	three_prime_UTR;Hsp90b1;protein_coding;ENSMUSG00000020048.13	95.3403	-
chr10	86690981	86690990	three_prime_UTR;Hsp90b1;protein_coding;ENSMUSG00000020048.13	93.2099	-
chr10	86691021	86691030	three_prime_UTR;Hsp90b1;protein_coding;ENSMUSG00000020048.13	11.998	-
chr10	86691082	86691091	three_prime_UTR;Hsp90b1;protein_coding;ENSMUSG00000020048.13	1.48194	-
chr10	86691092	86691101	three_prime_UTR;Hsp90b1;protein_coding;ENSMUSG00000020048.13	14.1891	-
chr10	86691118	86691127	CDS;Hsp90b1;protein_coding;ENSMUSG00000020048.13	7.49452	-
chr10	86694038	86694047	CDS;Hsp90b1;protein_coding;ENSMUSG00000020048.13	11.7679	-
chr10	86694075	86694084	CDS;Hsp90b1;protein_coding;ENSMUSG00000020048.13	32.063	-
chr10	86695531	86695540	CDS;Hsp90b1;protein_coding;ENSMUSG00000020048.13	13.0563	-
chr10	86695666	86695675	CDS;Hsp90b1;protein_coding;ENSMUSG00000020048.13	39.9635	-
chr10	86695725	86695734	CDS;Hsp90b1;protein_coding;ENSMUSG00000020048.13	44.9995	-
chr10	89652993	89653002	CDS;Scyl2;protein_coding;ENSMUSG00000069539.11	5.26503	-
chr10	91116869	91116878	three_prime_UTR;Slc25a3;protein_coding;ENSMUSG00000061904.12	8.61277	-
chr10	91116915	91116924	three_prime_UTR;Slc25a3;protein_coding;ENSMUSG00000061904.12	13.078	-
chr10	91116948	91116957	three_prime_UTR;Slc25a3;protein_coding;ENSMUSG00000061904.12	18.9093	-
chr10	91116970	91116979	three_prime_UTR;Slc25a3;protein_coding;ENSMUSG00000061904.12	13.1437	-
chr10	91117007	91117016	three_prime_UTR;Slc25a3;protein_coding;ENSMUSG00000061904.12	34.4192	-
chr10	91117083	91117092	three_prime_UTR;Slc25a3;protein_coding;ENSMUSG00000061904.12	31.9372	-
chr10	91117252	91117261	three_prime_UTR;Slc25a3;protein_coding;ENSMUSG00000061904.12	110.039	-
chr10	91117262	91117271	three_prime_UTR;Slc25a3;protein_coding;ENSMUSG00000061904.12	2.41888	-
chr10	91117281	91117290	three_prime_UTR;Slc25a3;protein_coding;ENSMUSG00000061904.12	8.46629	-
chr10	91117298	91117307	three_prime_UTR;Slc25a3;protein_coding;ENSMUSG00000061904.12	0.834157	-
chr10	91118045	91118054	three_prime_UTR;Slc25a3;protein_coding;ENSMUSG00000061904.12	30.2495	-
chr10	91118058	91118067	three_prime_UTR;Slc25a3;protein_coding;ENSMUSG00000061904.12	69.6104	-
chr10	91118132	91118141	three_prime_UTR;Slc25a3;protein_coding;ENSMUSG00000061904.12	54.3618	-
chr10	91118143	91118152	three_prime_UTR;Slc25a3;protein_coding;ENSMUSG00000061904.12	45.8064	-
chr10	91118156	91118165	three_prime_UTR;Slc25a3;protein_coding;ENSMUSG00000061904.12	20.8289	-
chr10	91118171	91118180	three_prime_UTR;Slc25a3;protein_coding;ENSMUSG00000061904.12	6.73504	-
chr10	91118196	91118205	three_prime_UTR;Slc25a3;protein_coding;ENSMUSG00000061904.12	15.8172	-
chr10	91118425	91118434	intron;Slc25a3;protein_coding;ENSMUSG00000061904.12	19.0489	-
chr10	91118534	91118543	intron;Slc25a3;protein_coding;ENSMUSG00000061904.12	29.3404	-
chr10	91118701	91118710	three_prime_UTR;Slc25a3;protein_coding;ENSMUSG00000061904.12	61.435	-
chr10	91118792	91118801	three_prime_UTR;Slc25a3;protein_coding;ENSMUSG00000061904.12	705.75	-
chr10	91118804	91118813	three_prime_UTR;Slc25a3;protein_coding;ENSMUSG00000061904.12	2198.51	-
chr10	91123097	91123106	exon;Slc25a3;protein_coding;ENSMUSG00000061904.12	11.187	-
chr10	91123222	91123231	exon;Slc25a3;protein_coding;ENSMUSG00000061904.12	14.5455	-
chr10	91123574	91123583	CDS;Slc25a3;protein_coding;ENSMUSG00000061904.12	32.0552	-
chr10	91123584	91123593	CDS;Slc25a3;protein_coding;ENSMUSG00000061904.12	34.0195	-
chr10	91123600	91123609	CDS;Slc25a3;protein_coding;ENSMUSG00000061904.12	12.762	-
chr10	91123704	91123713	five_prime_UTR;Slc25a3;protein_coding;ENSMUSG00000061904.12	27.0734	-
chr10	91123944	91123953	five_prime_UTR;Slc25a3;protein_coding;ENSMUSG00000061904.12	1.78009	-
chr10	91123964	91123973	five_prime_UTR;Slc25a3;protein_coding;ENSMUSG00000061904.12	151.898	-
chr10	91147622	91147631	three_prime_UTR;Tmpo;protein_coding;ENSMUSG00000019961.17	23.8737	-
chr10	91147647	91147656	three_prime_UTR;Tmpo;protein_coding;ENSMUSG00000019961.17	15.8195	-
chr10	91147663	91147672	three_prime_UTR;Tmpo;protein_coding;ENSMUSG00000019961.17	170.949	-
chr10	91147683	91147692	three_prime_UTR;Tmpo;protein_coding;ENSMUSG00000019961.17	129.976	-
chr10	91147805	91147814	three_prime_UTR;Tmpo;protein_coding;ENSMUSG00000019961.17	1.95134	-
chr10	91147913	91147922	three_prime_UTR;Tmpo;protein_coding;ENSMUSG00000019961.17	8.27005	-
chr10	91147949	91147958	three_prime_UTR;Tmpo;protein_coding;ENSMUSG00000019961.17	15.2923	-
chr10	91147977	91147986	three_prime_UTR;Tmpo;protein_coding;ENSMUSG00000019961.17	50.5877	-
chr10	91148086	91148095	three_prime_UTR;Tmpo;protein_coding;ENSMUSG00000019961.17	23.8348	-
chr10	91148096	91148105	three_prime_UTR;Tmpo;protein_coding;ENSMUSG00000019961.17	9.27851	-
chr10	91148134	91148143	three_prime_UTR;Tmpo;protein_coding;ENSMUSG00000019961.17	1.08588	-
chr10	91148152	91148161	three_prime_UTR;Tmpo;protein_coding;ENSMUSG00000019961.17	39.7209	-
chr10	91148188	91148197	three_prime_UTR;Tmpo;protein_coding;ENSMUSG00000019961.17	44.5342	-
chr10	91148251	91148260	three_prime_UTR;Tmpo;protein_coding;ENSMUSG00000019961.17	17.6871	-
chr10	91148468	91148477	three_prime_UTR;Tmpo;protein_coding;ENSMUSG00000019961.17	3.23742	-
chr10	91148541	91148550	three_prime_UTR;Tmpo;protein_coding;ENSMUSG00000019961.17	74.8234	-
chr10	91148758	91148767	three_prime_UTR;Tmpo;protein_coding;ENSMUSG00000019961.17	19.0178	-
chr10	91148792	91148801	three_prime_UTR;Tmpo;protein_coding;ENSMUSG00000019961.17	19.5537	-
chr10	91148850	91148859	three_prime_UTR;Tmpo;protein_coding;ENSMUSG00000019961.17	6.90895	-
chr10	91149102	91149111	three_prime_UTR;Tmpo;protein_coding;ENSMUSG00000019961.17	30.8457	-
chr10	91149229	91149238	three_prime_UTR;Tmpo;protein_coding;ENSMUSG00000019961.17	86.5069	-
chr10	91149246	91149255	three_prime_UTR;Tmpo;protein_coding;ENSMUSG00000019961.17	27.7169	-
chr10	91149267	91149276	three_prime_UTR;Tmpo;protein_coding;ENSMUSG00000019961.17	148.914	-
chr10	91149347	91149356	three_prime_UTR;Tmpo;protein_coding;ENSMUSG00000019961.17	2.89256	-
chr10	91149374	91149383	three_prime_UTR;Tmpo;protein_coding;ENSMUSG00000019961.17	8.44149	-
chr10	91149411	91149420	three_prime_UTR;Tmpo;protein_coding;ENSMUSG00000019961.17	35.5911	-
chr10	91149452	91149461	three_prime_UTR;Tmpo;protein_coding;ENSMUSG00000019961.17	12.4352	-
chr10	91149463	91149472	three_prime_UTR;Tmpo;protein_coding;ENSMUSG00000019961.17	1.03676	-
chr10	91149551	91149560	CDS;Tmpo;protein_coding;ENSMUSG00000019961.17	91.4593	-
chr10	91149576	91149585	CDS;Tmpo;protein_coding;ENSMUSG00000019961.17	67.3314	-
chr10	91155697	91155706	intron;Tmpo;protein_coding;ENSMUSG00000019961.17	8.61596	-
chr10	91160471	91160480	three_prime_UTR;Tmpo;protein_coding;ENSMUSG00000019961.17	39.0412	-
chr10	91160669	91160678	three_prime_UTR;Tmpo;protein_coding;ENSMUSG00000019961.17	27.8422	-
chr10	91160705	91160714	three_prime_UTR;Tmpo;protein_coding;ENSMUSG00000019961.17	4.68197	-
chr10	91160809	91160818	three_prime_UTR;Tmpo;protein_coding;ENSMUSG00000019961.17	4.09322	-
chr10	91160985	91160994	three_prime_UTR;Tmpo;protein_coding;ENSMUSG00000019961.17	10.7657	-
chr10	91161443	91161452	three_prime_UTR;Tmpo;protein_coding;ENSMUSG00000019961.17	10.885	-
chr10	91165997	91166006	CDS;Tmpo;protein_coding;ENSMUSG00000019961.17	3.40301	-
chr10	92684789	92684798	three_prime_UTR;Nedd1;protein_coding;ENSMUSG00000019988.7	2.66705	-
chr10	92684839	92684848	three_prime_UTR;Nedd1;protein_coding;ENSMUSG00000019988.7	21.7302	-
chr10	92684853	92684862	three_prime_UTR;Nedd1;protein_coding;ENSMUSG00000019988.7	45.9599	-
chr10	92684869	92684878	three_prime_UTR;Nedd1;protein_coding;ENSMUSG00000019988.7	49.3526	-
chr10	92684955	92684964	three_prime_UTR;Nedd1;protein_coding;ENSMUSG00000019988.7	197.999	-
chr10	92684965	92684974	three_prime_UTR;Nedd1;protein_coding;ENSMUSG00000019988.7	142.653	-
chr10	92684982	92684991	three_prime_UTR;Nedd1;protein_coding;ENSMUSG00000019988.7	148.016	-
chr10	92684996	92685005	three_prime_UTR;Nedd1;protein_coding;ENSMUSG00000019988.7	183.5	-
chr10	92685018	92685027	three_prime_UTR;Nedd1;protein_coding;ENSMUSG00000019988.7	115.217	-
chr10	92685068	92685077	three_prime_UTR;Nedd1;protein_coding;ENSMUSG00000019988.7	26.1527	-
chr10	92685122	92685131	three_prime_UTR;Nedd1;protein_coding;ENSMUSG00000019988.7	3.41112	-
chr10	92685206	92685215	three_prime_UTR;Nedd1;protein_coding;ENSMUSG00000019988.7	28.5241	-
chr10	92685220	92685229	three_prime_UTR;Nedd1;protein_coding;ENSMUSG00000019988.7	2.34329	-
chr10	92685281	92685290	three_prime_UTR;Nedd1;protein_coding;ENSMUSG00000019988.7	4.18594	-
chr10	92685359	92685368	three_prime_UTR;Nedd1;protein_coding;ENSMUSG00000019988.7	16.7707	-
chr10	92685608	92685617	three_prime_UTR;Nedd1;protein_coding;ENSMUSG00000019988.7	5.34432	-
chr10	92686094	92686103	three_prime_UTR;Nedd1;protein_coding;ENSMUSG00000019988.7	4.28084	-
chr10	93240106	93240115	three_prime_UTR;Cdk17;protein_coding;ENSMUSG00000020015.10	9.35917	+
chr10	93241041	93241050	three_prime_UTR;Cdk17;protein_coding;ENSMUSG00000020015.10	13.4468	+
chr10	93241055	93241064	three_prime_UTR;Cdk17;protein_coding;ENSMUSG00000020015.10	28.2684	+
chr10	93241069	93241078	three_prime_UTR;Cdk17;protein_coding;ENSMUSG00000020015.10	6.39281	+
chr10	93241181	93241190	three_prime_UTR;Cdk17;protein_coding;ENSMUSG00000020015.10	7.02535	+
chr10	93241213	93241222	three_prime_UTR;Cdk17;protein_coding;ENSMUSG00000020015.10	15.4519	+
chr10	95411555	95411564	three_prime_UTR;Socs2;protein_coding;ENSMUSG00000020027.18	46.5716	-
chr10	95411591	95411600	three_prime_UTR;Socs2;protein_coding;ENSMUSG00000020027.18	44.1786	-
chr10	95411603	95411612	three_prime_UTR;Socs2;protein_coding;ENSMUSG00000020027.18	138.715	-
chr10	95411648	95411657	three_prime_UTR;Socs2;protein_coding;ENSMUSG00000020027.18	68.3397	-
chr10	95411674	95411683	three_prime_UTR;Socs2;protein_coding;ENSMUSG00000020027.18	114.235	-
chr10	95411711	95411720	three_prime_UTR;Socs2;protein_coding;ENSMUSG00000020027.18	329.396	-
chr10	95411768	95411777	three_prime_UTR;Socs2;protein_coding;ENSMUSG00000020027.18	197.805	-
chr10	95411787	95411796	three_prime_UTR;Socs2;protein_coding;ENSMUSG00000020027.18	1.51554	-
chr10	95411886	95411895	three_prime_UTR;Socs2;protein_coding;ENSMUSG00000020027.18	37.2994	-
chr10	95412061	95412070	three_prime_UTR;Socs2;protein_coding;ENSMUSG00000020027.18	15.6937	-
chr10	95412440	95412449	three_prime_UTR;Socs2;protein_coding;ENSMUSG00000020027.18	6.61009	-
chr10	95412462	95412471	three_prime_UTR;Socs2;protein_coding;ENSMUSG00000020027.18	427.018	-
chr10	96617122	96617131	five_prime_UTR;Btg1;protein_coding;ENSMUSG00000036478.8	43.4304	+
chr10	96617155	96617164	five_prime_UTR;Btg1;protein_coding;ENSMUSG00000036478.8	3.21153	+
chr10	96617332	96617341	CDS;Btg1;protein_coding;ENSMUSG00000036478.8	79.0315	+
chr10	96617350	96617359	CDS;Btg1;protein_coding;ENSMUSG00000036478.8	4.09146	+
chr10	96617385	96617394	CDS;Btg1;protein_coding;ENSMUSG00000036478.8	16.8101	+
chr10	96618838	96618847	three_prime_UTR;Btg1;protein_coding;ENSMUSG00000036478.8	139.01	+
chr10	96618852	96618861	three_prime_UTR;Btg1;protein_coding;ENSMUSG00000036478.8	58.9469	+
chr10	96618980	96618989	three_prime_UTR;Btg1;protein_coding;ENSMUSG00000036478.8	28.4491	+
chr10	96619214	96619223	three_prime_UTR;Btg1;protein_coding;ENSMUSG00000036478.8	211.756	+
chr10	96619224	96619233	three_prime_UTR;Btg1;protein_coding;ENSMUSG00000036478.8	30.7071	+
chr10	98968805	98968814	five_prime_UTR;Atp2b1;protein_coding;ENSMUSG00000019943.10	29.9435	+
chr10	98968825	98968834	five_prime_UTR;Atp2b1;protein_coding;ENSMUSG00000019943.10	34.6678	+
chr10	98968900	98968909	five_prime_UTR;Atp2b1;protein_coding;ENSMUSG00000019943.10	7.33939	+
chr10	99023257	99023266	three_prime_UTR;Atp2b1;protein_coding;ENSMUSG00000019943.10	39.8798	+
chr10	99266380	99266389	three_prime_UTR;Dusp6;protein_coding;ENSMUSG00000019960.8	3.09358	+
chr10	99266404	99266413	three_prime_UTR;Dusp6;protein_coding;ENSMUSG00000019960.8	1.63569	+
chr10	99266580	99266589	three_prime_UTR;Dusp6;protein_coding;ENSMUSG00000019960.8	18.7245	+
chr10	99266596	99266605	three_prime_UTR;Dusp6;protein_coding;ENSMUSG00000019960.8	98.6574	+
chr10	99266650	99266659	three_prime_UTR;Dusp6;protein_coding;ENSMUSG00000019960.8	22.7826	+
chr10	99266692	99266701	three_prime_UTR;Dusp6;protein_coding;ENSMUSG00000019960.8	44.5474	+
chr10	99266722	99266731	three_prime_UTR;Dusp6;protein_coding;ENSMUSG00000019960.8	14.6175	+
chr10	99266803	99266812	three_prime_UTR;Dusp6;protein_coding;ENSMUSG00000019960.8	8.37057	+
chr10	99266844	99266853	three_prime_UTR;Dusp6;protein_coding;ENSMUSG00000019960.8	4.75843	+
chr10	99267203	99267212	three_prime_UTR;Dusp6;protein_coding;ENSMUSG00000019960.8	4.30278	+
chr10	99267325	99267334	three_prime_UTR;Dusp6;protein_coding;ENSMUSG00000019960.8	32.8352	+
chr10	99267337	99267346	three_prime_UTR;Dusp6;protein_coding;ENSMUSG00000019960.8	42.1992	+
chr10	99267349	99267358	three_prime_UTR;Dusp6;protein_coding;ENSMUSG00000019960.8	45.7847	+
chr10	108278142	108278151	three_prime_UTR;Ppp1r12a;protein_coding;ENSMUSG00000019907.10	34.8183	+
chr10	108278188	108278197	three_prime_UTR;Ppp1r12a;protein_coding;ENSMUSG00000019907.10	28.9488	+
chr10	108279593	108279602	three_prime_UTR;Ppp1r12a;protein_coding;ENSMUSG00000019907.10	14.5533	+
chr10	108279615	108279624	three_prime_UTR;Ppp1r12a;protein_coding;ENSMUSG00000019907.10	1.1412	+
chr10	111294794	111294803	three_prime_UTR;Osbpl8;protein_coding;ENSMUSG00000020189.15	5.87451	+
chr10	111294829	111294838	three_prime_UTR;Osbpl8;protein_coding;ENSMUSG00000020189.15	4.96023	+
chr10	111294854	111294863	three_prime_UTR;Osbpl8;protein_coding;ENSMUSG00000020189.15	6.38041	+
chr10	111295059	111295068	three_prime_UTR;Osbpl8;protein_coding;ENSMUSG00000020189.15	6.78168	+
chr10	111984637	111984646	CDS;Krr1;protein_coding;ENSMUSG00000063334.16	1.57555	+
chr10	111984652	111984661	CDS;Krr1;protein_coding;ENSMUSG00000063334.16	39.6613	+
chr10	111984674	111984683	stop_codon;Krr1;protein_coding;ENSMUSG00000063334.16	36.5972	+
chr10	111984688	111984697	three_prime_UTR;Krr1;protein_coding;ENSMUSG00000063334.16	36.3549	+
chr10	111984699	111984708	three_prime_UTR;Krr1;protein_coding;ENSMUSG00000063334.16	74.8224	+
chr10	112926404	112926413	three_prime_UTR;Atxn7l3b;protein_coding;ENSMUSG00000074748.3	24.6812	-
chr10	115198536	115198545	three_prime_UTR;Tbc1d15;protein_coding;ENSMUSG00000020130.9	34.5562	-
chr10	115208933	115208942	CDS;Tbc1d15;protein_coding;ENSMUSG00000020130.9	56.4298	-
chr10	115288613	115288622	three_prime_UTR;Rab21;protein_coding;ENSMUSG00000020132.10	38.4612	-
chr10	115288623	115288632	three_prime_UTR;Rab21;protein_coding;ENSMUSG00000020132.10	60.7945	-
chr10	115289919	115289928	three_prime_UTR;Rab21;protein_coding;ENSMUSG00000020132.10	42.5173	-
chr10	115289932	115289941	three_prime_UTR;Rab21;protein_coding;ENSMUSG00000020132.10	49.1249	-
chr10	115290257	115290266	three_prime_UTR;Rab21;protein_coding;ENSMUSG00000020132.10	3.06189	-
chr10	115290381	115290390	three_prime_UTR;Rab21;protein_coding;ENSMUSG00000020132.10	6.79587	-
chr10	115290391	115290400	three_prime_UTR;Rab21;protein_coding;ENSMUSG00000020132.10	5.5289	-
chr10	115290408	115290417	three_prime_UTR;Rab21;protein_coding;ENSMUSG00000020132.10	5.27158	-
chr10	115290444	115290453	three_prime_UTR;Rab21;protein_coding;ENSMUSG00000020132.10	5.8745	-
chr10	116485246	116485255	three_prime_UTR;Cnot2;protein_coding;ENSMUSG00000020166.15	30.6309	-
chr10	116485260	116485269	three_prime_UTR;Cnot2;protein_coding;ENSMUSG00000020166.15	10.4135	-
chr10	116485284	116485293	three_prime_UTR;Cnot2;protein_coding;ENSMUSG00000020166.15	8.5224	-
chr10	116485355	116485364	three_prime_UTR;Cnot2;protein_coding;ENSMUSG00000020166.15	9.14451	-
chr10	116485589	116485598	three_prime_UTR;Cnot2;protein_coding;ENSMUSG00000020166.15	22.9027	-
chr10	116485677	116485686	three_prime_UTR;Cnot2;protein_coding;ENSMUSG00000020166.15	1.59079	-
chr10	116485701	116485710	three_prime_UTR;Cnot2;protein_coding;ENSMUSG00000020166.15	13.6303	-
chr10	117051070	117051079	three_prime_UTR;Cct2;protein_coding;ENSMUSG00000034024.8	6.01504	-
chr10	117051088	117051097	three_prime_UTR;Cct2;protein_coding;ENSMUSG00000034024.8	8.78602	-
chr10	117346653	117346662	three_prime_UTR;Cpsf6;protein_coding;ENSMUSG00000055531.12	9.4282	-
chr10	117346675	117346684	three_prime_UTR;Cpsf6;protein_coding;ENSMUSG00000055531.12	8.59675	-
chr10	117346711	117346720	three_prime_UTR;Cpsf6;protein_coding;ENSMUSG00000055531.12	54.7952	-
chr10	117346722	117346731	three_prime_UTR;Cpsf6;protein_coding;ENSMUSG00000055531.12	1.20308	-
chr10	117689100	117689109	three_prime_UTR;Mdm2;protein_coding;ENSMUSG00000020184.15	10.2308	-
chr10	117734760	117734769	three_prime_UTR;Slc35e3;protein_coding;ENSMUSG00000060181.6	3.67289	-
chr10	117734790	117734799	three_prime_UTR;Slc35e3;protein_coding;ENSMUSG00000060181.6	5.77476	-
chr10	117734801	117734810	three_prime_UTR;Slc35e3;protein_coding;ENSMUSG00000060181.6	26.5855	-
chr10	117734824	117734833	three_prime_UTR;Slc35e3;protein_coding;ENSMUSG00000060181.6	48.0459	-
chr10	117763786	117763795	three_prime_UTR;Nup107;protein_coding;ENSMUSG00000052798.13	6.61675	-
chr10	117763813	117763822	three_prime_UTR;Nup107;protein_coding;ENSMUSG00000052798.13	81.8949	-
chr10	117787867	117787876	CDS;Nup107;protein_coding;ENSMUSG00000052798.13	13.9658	-
chr10	117787881	117787890	CDS;Nup107;protein_coding;ENSMUSG00000052798.13	70.6623	-
chr10	117814598	117814607	three_prime_UTR;Rap1b;protein_coding;ENSMUSG00000052681.8	41.7573	-
chr10	117814616	117814625	three_prime_UTR;Rap1b;protein_coding;ENSMUSG00000052681.8	37.7574	-
chr10	117814736	117814745	three_prime_UTR;Rap1b;protein_coding;ENSMUSG00000052681.8	65.8202	-
chr10	117814913	117814922	three_prime_UTR;Rap1b;protein_coding;ENSMUSG00000052681.8	4.8769	-
chr10	117814938	117814947	three_prime_UTR;Rap1b;protein_coding;ENSMUSG00000052681.8	316.564	-
chr10	117814999	117815008	three_prime_UTR;Rap1b;protein_coding;ENSMUSG00000052681.8	44.6696	-
chr10	117815011	117815020	three_prime_UTR;Rap1b;protein_coding;ENSMUSG00000052681.8	30.8924	-
chr10	117815031	117815040	three_prime_UTR;Rap1b;protein_coding;ENSMUSG00000052681.8	96.7296	-
chr10	117815173	117815182	three_prime_UTR;Rap1b;protein_coding;ENSMUSG00000052681.8	2.9849	-
chr10	117815259	117815268	three_prime_UTR;Rap1b;protein_coding;ENSMUSG00000052681.8	14.6864	-
chr10	117815286	117815295	three_prime_UTR;Rap1b;protein_coding;ENSMUSG00000052681.8	32.2623	-
chr10	117815597	117815606	three_prime_UTR;Rap1b;protein_coding;ENSMUSG00000052681.8	7.7256	-
chr10	117815613	117815622	three_prime_UTR;Rap1b;protein_coding;ENSMUSG00000052681.8	6.43997	-
chr10	117822807	117822816	CDS;Rap1b;protein_coding;ENSMUSG00000052681.8	11.3765	-
chr10	117822817	117822826	CDS;Rap1b;protein_coding;ENSMUSG00000052681.8	1.24871	-
chr10	117822851	117822860	CDS;Rap1b;protein_coding;ENSMUSG00000052681.8	5.40484	-
chr10	118855716	118855725	three_prime_UTR;Dyrk2;protein_coding;ENSMUSG00000028630.9	1.20041	-
chr10	118858658	118858667	three_prime_UTR;Dyrk2;protein_coding;ENSMUSG00000028630.9	11.0166	-
chr10	118859296	118859305	three_prime_UTR;Dyrk2;protein_coding;ENSMUSG00000028630.9	38.0181	-
chr10	118859419	118859428	three_prime_UTR;Dyrk2;protein_coding;ENSMUSG00000028630.9	1.82436	-
chr10	118859438	118859447	three_prime_UTR;Dyrk2;protein_coding;ENSMUSG00000028630.9	24.7383	-
chr10	119202698	119202707	three_prime_UTR;Cand1;protein_coding;ENSMUSG00000020114.12	11.8002	-
chr10	120931161	120931170	CDS;Lemd3;protein_coding;ENSMUSG00000048661.14	87.3558	-
chr10	120931176	120931185	CDS;Lemd3;protein_coding;ENSMUSG00000048661.14	56.0974	-
chr10	121410423	121410432	three_prime_UTR;Rassf3;protein_coding;ENSMUSG00000025795.8	4.40402	-
chr10	121410859	121410868	three_prime_UTR;Rassf3;protein_coding;ENSMUSG00000025795.8	17.9462	-
chr10	121411390	121411399	three_prime_UTR;Rassf3;protein_coding;ENSMUSG00000025795.8	7.69885	-
chr10	121411432	121411441	three_prime_UTR;Rassf3;protein_coding;ENSMUSG00000025795.8	56.8357	-
chr10	121416088	121416097	CDS;Rassf3;protein_coding;ENSMUSG00000025795.8	126.284	-
chr10	121416098	121416107	CDS;Rassf3;protein_coding;ENSMUSG00000025795.8	326.664	-
chr10	121416115	121416124	CDS;Rassf3;protein_coding;ENSMUSG00000025795.8	4.53268	-
[truncated: 17,759 more rows]

## Sheet: 03_human_anybiotype_genes
	ensembl_id	label
0	ENSG00000122545	bound_ortholog
1	ENSG00000108946	bound_ortholog
2	ENSG00000189043	bound_ortholog
3	ENSG00000073614	bound_ortholog
4	ENSG00000174574	bound_ortholog
5	ENSG00000181555	bound_ortholog
6	ENSG00000154518	bound_ortholog
7	ENSG00000151332	bound_ortholog
8	ENSG00000025293	bound_ortholog
9	ENSG00000127314	bound_ortholog
10	ENSG00000100479	bound_ortholog
11	ENSG00000113810	bound_ortholog
12	ENSG00000065809	bound_ortholog
13	ENSG00000134324	bound_ortholog
14	ENSG00000162924	bound_ortholog
15	ENSG00000106144	bound_ortholog
16	ENSG00000055483	bound_ortholog
17	ENSG00000213066	bound_ortholog
18	ENSG00000114737	bound_ortholog
19	ENSG00000100650	bound_ortholog
20	ENSG00000115760	bound_ortholog
21	ENSG00000161016	bound_ortholog
22	ENSG00000086758	bound_ortholog
23	ENSG00000100216	bound_ortholog
24	ENSG00000167005	bound_ortholog
25	ENSG00000128590	bound_ortholog
26	ENSG00000140443	bound_ortholog
27	ENSG00000163681	bound_ortholog
28	ENSG00000084112	bound_ortholog
29	ENSG00000111885	bound_ortholog
30	ENSG00000162775	bound_ortholog
31	ENSG00000171634	bound_ortholog
32	ENSG00000135074	bound_ortholog
33	ENSG00000166233	bound_ortholog
34	ENSG00000198408	bound_ortholog
35	ENSG00000165244	bound_ortholog
36	ENSG00000186432	bound_ortholog
37	ENSG00000173559	bound_ortholog
38	ENSG00000265972	bound_ortholog
39	ENSG00000273542	bound_ortholog
40	ENSG00000109756	bound_ortholog
41	ENSG00000120158	bound_ortholog
42	ENSG00000120705	bound_ortholog
43	ENSG00000131389	bound_ortholog
44	ENSG00000148835	bound_ortholog
45	ENSG00000105193	bound_ortholog
46	ENSG00000278463	bound_ortholog
47	ENSG00000101596	bound_ortholog
48	ENSG00000071537	bound_ortholog
49	ENSG00000124786	bound_ortholog
50	ENSG00000171940	bound_ortholog
51	ENSG00000104408	bound_ortholog
52	ENSG00000065613	bound_ortholog
53	ENSG00000163874	bound_ortholog
54	ENSG00000152332	bound_ortholog
55	ENSG00000134108	bound_ortholog
56	ENSG00000120802	bound_ortholog
57	ENSG00000127022	bound_ortholog
58	ENSG00000151694	bound_ortholog
59	ENSG00000118816	bound_ortholog
60	ENSG00000165494	bound_ortholog
61	ENSG00000125386	bound_ortholog
62	ENSG00000118503	bound_ortholog
63	ENSG00000065413	bound_ortholog
64	ENSG00000111615	bound_ortholog
65	ENSG00000167470	bound_ortholog
66	ENSG00000060237	bound_ortholog
67	ENSG00000147138	bound_ortholog
68	ENSG00000128923	bound_ortholog
69	ENSG00000082074	bound_ortholog
70	ENSG00000140455	bound_ortholog
71	ENSG00000143376	bound_ortholog
72	ENSG00000112406	bound_ortholog
73	ENSG00000072274	bound_ortholog
74	ENSG00000064309	bound_ortholog
75	ENSG00000124486	bound_ortholog
76	ENSG00000107581	bound_ortholog
77	ENSG00000170260	bound_ortholog
78	ENSG00000109332	bound_ortholog
79	ENSG00000065675	bound_ortholog
80	ENSG00000133574	bound_ortholog
81	ENSG00000137414	bound_ortholog
82	ENSG00000163584	bound_ortholog
83	ENSG00000031823	bound_ortholog
84	ENSG00000143384	bound_ortholog
85	ENSG00000149308	bound_ortholog
86	ENSG00000168685	bound_ortholog
87	ENSG00000101773	bound_ortholog
88	ENSG00000134996	bound_ortholog
89	ENSG00000170027	bound_ortholog
90	ENSG00000159592	bound_ortholog
91	ENSG00000275052	bound_ortholog
92	ENSG00000069702	bound_ortholog
93	ENSG00000163605	bound_ortholog
94	ENSG00000133639	bound_ortholog
95	ENSG00000182866	bound_ortholog
96	ENSG00000166266	bound_ortholog
97	ENSG00000287080	bound_ortholog
98	ENSG00000116824	bound_ortholog
99	ENSG00000148700	bound_ortholog
100	ENSG00000143870	bound_ortholog
101	ENSG00000197969	bound_ortholog
102	ENSG00000108055	bound_ortholog
103	ENSG00000198612	bound_ortholog
104	ENSG00000105438	bound_ortholog
105	ENSG00000009780	bound_ortholog
106	ENSG00000134186	bound_ortholog
107	ENSG00000168214	bound_ortholog
108	ENSG00000101224	bound_ortholog
109	ENSG00000198286	bound_ortholog
110	ENSG00000099901	bound_ortholog
111	ENSG00000163466	bound_ortholog
112	ENSG00000142599	bound_ortholog
113	ENSG00000171928	bound_ortholog
114	ENSG00000111371	bound_ortholog
115	ENSG00000005302	bound_ortholog
116	ENSG00000118515	bound_ortholog
117	ENSG00000197747	bound_ortholog
118	ENSG00000142534	bound_ortholog
119	ENSG00000146386	bound_ortholog
120	ENSG00000107854	bound_ortholog
121	ENSG00000080839	bound_ortholog
122	ENSG00000103018	bound_ortholog
123	ENSG00000109762	bound_ortholog
124	ENSG00000141582	bound_ortholog
125	ENSG00000114346	bound_ortholog
126	ENSG00000132670	bound_ortholog
127	ENSG00000197299	bound_ortholog
128	ENSG00000075568	bound_ortholog
129	ENSG00000168283	bound_ortholog
130	ENSG00000171858	bound_ortholog
131	ENSG00000101849	bound_ortholog
132	ENSG00000179859	bound_ortholog
133	ENSG00000176390	bound_ortholog
134	ENSG00000161547	bound_ortholog
135	ENSG00000167522	bound_ortholog
136	ENSG00000119335	bound_ortholog
137	ENSG00000159692	bound_ortholog
138	ENSG00000148843	bound_ortholog
139	ENSG00000027075	bound_ortholog
140	ENSG00000162642	bound_ortholog
141	ENSG00000145907	bound_ortholog
142	ENSG00000171793	bound_ortholog
143	ENSG00000159388	bound_ortholog
144	ENSG00000158615	bound_ortholog
145	ENSG00000221914	bound_ortholog
146	ENSG00000148516	bound_ortholog
147	ENSG00000143398	bound_ortholog
148	ENSG00000196968	bound_ortholog
149	ENSG00000066084	bound_ortholog
150	ENSG00000159131	bound_ortholog
151	ENSG00000149480	bound_ortholog
152	ENSG00000149212	bound_ortholog
153	ENSG00000152382	bound_ortholog
154	ENSG00000138768	bound_ortholog
155	ENSG00000153944	bound_ortholog
156	ENSG00000100345	bound_ortholog
157	ENSG00000184489	bound_ortholog
158	ENSG00000182700	bound_ortholog
159	ENSG00000172943	bound_ortholog
160	ENSG00000152127	bound_ortholog
161	ENSG00000103657	bound_ortholog
162	ENSG00000198799	bound_ortholog
163	ENSG00000197451	bound_ortholog
164	ENSG00000172869	bound_ortholog
165	ENSG00000228474	bound_ortholog
166	ENSG00000123329	bound_ortholog
167	ENSG00000164654	bound_ortholog
168	ENSG00000054267	bound_ortholog
169	ENSG00000095015	bound_ortholog
170	ENSG00000170571	bound_ortholog
171	ENSG00000175305	bound_ortholog
172	ENSG00000009335	bound_ortholog
173	ENSG00000174437	bound_ortholog
174	ENSG00000172071	bound_ortholog
175	ENSG00000108349	bound_ortholog
176	ENSG00000162704	bound_ortholog
177	ENSG00000139436	bound_ortholog
178	ENSG00000086062	bound_ortholog
179	ENSG00000057252	bound_ortholog
180	ENSG00000126261	bound_ortholog
181	ENSG00000064419	bound_ortholog
182	ENSG00000147251	bound_ortholog
183	ENSG00000164603	bound_ortholog
184	ENSG00000132424	bound_ortholog
185	ENSG00000275126	bound_ortholog
186	ENSG00000175215	bound_ortholog
187	ENSG00000134516	bound_ortholog
188	ENSG00000135018	bound_ortholog
189	ENSG00000115935	bound_ortholog
190	ENSG00000133065	bound_ortholog
191	ENSG00000113240	bound_ortholog
192	ENSG00000128585	bound_ortholog
193	ENSG00000083845	bound_ortholog
194	ENSG00000138378	bound_ortholog
195	ENSG00000278705	bound_ortholog
196	ENSG00000115875	bound_ortholog
197	ENSG00000266094	bound_ortholog
198	ENSG00000095139	bound_ortholog
199	ENSG00000178691	bound_ortholog
200	ENSG00000121481	bound_ortholog
201	ENSG00000152518	bound_ortholog
202	ENSG00000180776	bound_ortholog
203	ENSG00000196591	bound_ortholog
204	ENSG00000179115	bound_ortholog
205	ENSG00000186001	bound_ortholog
206	ENSG00000137478	bound_ortholog
207	ENSG00000120688	bound_ortholog
208	ENSG00000125447	bound_ortholog
209	ENSG00000151414	bound_ortholog
210	ENSG00000141298	bound_ortholog
211	ENSG00000137265	bound_ortholog
212	ENSG00000115421	bound_ortholog
213	ENSG00000116679	bound_ortholog
214	ENSG00000110048	bound_ortholog
215	ENSG00000107937	bound_ortholog
216	ENSG00000145901	bound_ortholog
217	ENSG00000182095	bound_ortholog
218	ENSG00000166747	bound_ortholog
219	ENSG00000136051	bound_ortholog
220	ENSG00000165792	bound_ortholog
221	ENSG00000111276	bound_ortholog
222	ENSG00000159140	bound_ortholog
223	ENSG00000065526	bound_ortholog
224	ENSG00000110108	bound_ortholog
225	ENSG00000080298	bound_ortholog
226	ENSG00000146802	bound_ortholog
227	ENSG00000126882	bound_ortholog
228	ENSG00000118363	bound_ortholog
229	ENSG00000160679	bound_ortholog
230	ENSG00000111912	bound_ortholog
231	ENSG00000163558	bound_ortholog
232	ENSG00000106829	bound_ortholog
233	ENSG00000132341	bound_ortholog
234	ENSG00000101216	bound_ortholog
235	ENSG00000021776	bound_ortholog
236	ENSG00000139350	bound_ortholog
237	ENSG00000122705	bound_ortholog
238	ENSG00000134882	bound_ortholog
239	ENSG00000076513	bound_ortholog
240	ENSG00000127995	bound_ortholog
241	ENSG00000112697	bound_ortholog
242	ENSG00000088038	bound_ortholog
243	ENSG00000070501	bound_ortholog
244	ENSG00000085719	bound_ortholog
245	ENSG00000110955	bound_ortholog
246	ENSG00000232810	bound_ortholog
247	ENSG00000049618	bound_ortholog
248	ENSG00000066427	bound_ortholog
249	ENSG00000078369	bound_ortholog
250	ENSG00000183337	bound_ortholog
251	ENSG00000111790	bound_ortholog
252	ENSG00000117222	bound_ortholog
253	ENSG00000137331	bound_ortholog
254	ENSG00000140575	bound_ortholog
255	ENSG00000133193	bound_ortholog
256	ENSG00000158985	bound_ortholog
257	ENSG00000068878	bound_ortholog
258	ENSG00000138942	bound_ortholog
259	ENSG00000123353	bound_ortholog
260	ENSG00000180817	bound_ortholog
261	ENSG00000173889	bound_ortholog
262	ENSG00000169714	bound_ortholog
263	ENSG00000085415	bound_ortholog
264	ENSG00000114744	bound_ortholog
265	ENSG00000116539	bound_ortholog
266	ENSG00000063046	bound_ortholog
267	ENSG00000078589	bound_ortholog
268	ENSG00000117318	bound_ortholog
269	ENSG00000154305	bound_ortholog
270	ENSG00000196588	bound_ortholog
271	ENSG00000163950	bound_ortholog
272	ENSG00000177565	bound_ortholog
273	ENSG00000130699	bound_ortholog
274	ENSG00000136451	bound_ortholog
275	ENSG00000131788	bound_ortholog
276	ENSG00000101558	bound_ortholog
277	ENSG00000071575	bound_ortholog
278	ENSG00000099219	bound_ortholog
279	ENSG00000129675	bound_ortholog
280	ENSG00000083312	bound_ortholog
281	ENSG00000184863	bound_ortholog
282	ENSG00000134900	bound_ortholog
283	ENSG00000136824	bound_ortholog
284	ENSG00000081019	bound_ortholog
285	ENSG00000170004	bound_ortholog
286	ENSG00000178127	bound_ortholog
287	ENSG00000162783	bound_ortholog
288	ENSG00000153815	bound_ortholog
289	ENSG00000105887	bound_ortholog
290	ENSG00000113716	bound_ortholog
291	ENSG00000162434	bound_ortholog
292	ENSG00000136754	bound_ortholog
293	ENSG00000137845	bound_ortholog
294	ENSG00000117091	bound_ortholog
295	ENSG00000055609	bound_ortholog
296	ENSG00000204899	bound_ortholog
297	ENSG00000023734	bound_ortholog
298	ENSG00000123066	bound_ortholog
299	ENSG00000178199	bound_ortholog
300	ENSG00000116478	bound_ortholog
301	ENSG00000112081	bound_ortholog
302	ENSG00000204264	bound_ortholog
303	ENSG00000129636	bound_ortholog
304	ENSG00000100813	bound_ortholog
305	ENSG00000135535	bound_ortholog
306	ENSG00000147548	bound_ortholog
307	ENSG00000140262	bound_ortholog
308	ENSG00000139718	bound_ortholog
309	ENSG00000113282	bound_ortholog
310	ENSG00000164754	bound_ortholog
311	ENSG00000089902	bound_ortholog
312	ENSG00000108848	bound_ortholog
313	ENSG00000178188	bound_ortholog
314	ENSG00000174013	bound_ortholog
315	ENSG00000065911	bound_ortholog
316	ENSG00000090447	bound_ortholog
317	ENSG00000133657	bound_ortholog
318	ENSG00000171791	bound_ortholog
319	ENSG00000149503	bound_ortholog
320	ENSG00000121579	bound_ortholog
321	ENSG00000078304	bound_ortholog
322	ENSG00000119402	bound_ortholog
323	ENSG00000005889	bound_ortholog
324	ENSG00000101096	bound_ortholog
325	ENSG00000065060	bound_ortholog
326	ENSG00000091140	bound_ortholog
327	ENSG00000166783	bound_ortholog
328	ENSG00000110696	bound_ortholog
329	ENSG00000106263	bound_ortholog
330	ENSG00000149187	bound_ortholog
331	ENSG00000257103	bound_ortholog
332	ENSG00000188529	bound_ortholog
333	ENSG00000157916	bound_ortholog
334	ENSG00000205339	bound_ortholog
335	ENSG00000094916	bound_ortholog
336	ENSG00000119414	bound_ortholog
337	ENSG00000101290	bound_ortholog
338	ENSG00000141867	bound_ortholog
339	ENSG00000126216	bound_ortholog
340	ENSG00000087086	bound_ortholog
341	ENSG00000132388	bound_ortholog
342	ENSG00000058272	bound_ortholog
343	ENSG00000135837	bound_ortholog
344	ENSG00000139679	bound_ortholog
345	ENSG00000129353	bound_ortholog
346	ENSG00000169508	bound_ortholog
347	ENSG00000125835	bound_ortholog
348	ENSG00000198771	bound_ortholog
349	ENSG00000096063	bound_ortholog
350	ENSG00000145734	bound_ortholog
351	ENSG00000169926	bound_ortholog
352	ENSG00000109452	bound_ortholog
353	ENSG00000125637	bound_ortholog
354	ENSG00000137776	bound_ortholog
355	ENSG00000137193	bound_ortholog
356	ENSG00000135775	bound_ortholog
357	ENSG00000169564	bound_ortholog
358	ENSG00000115419	bound_ortholog
359	ENSG00000159658	bound_ortholog
360	ENSG00000198918	bound_ortholog
361	ENSG00000168488	bound_ortholog
362	ENSG00000100485	bound_ortholog
363	ENSG00000145725	bound_ortholog
364	ENSG00000060491	bound_ortholog
365	ENSG00000008294	bound_ortholog
366	ENSG00000105926	bound_ortholog
367	ENSG00000155545	bound_ortholog
368	ENSG00000103342	bound_ortholog
369	ENSG00000205531	bound_ortholog
370	ENSG00000124788	bound_ortholog
371	ENSG00000242247	bound_ortholog
372	ENSG00000164151	bound_ortholog
373	ENSG00000146112	bound_ortholog
374	ENSG00000273983	bound_ortholog
375	ENSG00000129083	bound_ortholog
376	ENSG00000141293	bound_ortholog
377	ENSG00000143971	bound_ortholog
378	ENSG00000164307	bound_ortholog
379	ENSG00000119285	bound_ortholog
380	ENSG00000276966	bound_ortholog
381	ENSG00000111897	bound_ortholog
382	ENSG00000075856	bound_ortholog
383	ENSG00000164970	bound_ortholog
384	ENSG00000152495	bound_ortholog
385	ENSG00000132334	bound_ortholog
386	ENSG00000107863	bound_ortholog
387	ENSG00000146007	bound_ortholog
388	ENSG00000162511	bound_ortholog
389	ENSG00000152234	bound_ortholog
390	ENSG00000131759	bound_ortholog
391	ENSG00000062650	bound_ortholog
392	ENSG00000205268	bound_ortholog
393	ENSG00000148343	bound_ortholog
394	ENSG00000168421	bound_ortholog
395	ENSG00000137642	bound_ortholog
396	ENSG00000121892	bound_ortholog
397	ENSG00000159917	bound_ortholog
398	ENSG00000120616	bound_ortholog
399	ENSG00000159256	bound_ortholog
400	ENSG00000131370	bound_ortholog
401	ENSG00000185728	bound_ortholog
402	ENSG00000175105	bound_ortholog
403	ENSG00000213047	bound_ortholog
404	ENSG00000189308	bound_ortholog
405	ENSG00000172046	bound_ortholog
406	ENSG00000156136	bound_ortholog
407	ENSG00000110031	bound_ortholog
408	ENSG00000116754	bound_ortholog
409	ENSG00000168209	bound_ortholog
410	ENSG00000198431	bound_ortholog
411	ENSG00000275379	bound_ortholog
412	ENSG00000106299	bound_ortholog
413	ENSG00000146918	bound_ortholog
414	ENSG00000135250	bound_ortholog
415	ENSG00000070961	bound_ortholog
416	ENSG00000129657	bound_ortholog
417	ENSG00000105866	bound_ortholog
418	ENSG00000081237	bound_ortholog
419	ENSG00000100030	bound_ortholog
420	ENSG00000130741	bound_ortholog
421	ENSG00000165392	bound_ortholog
422	ENSG00000065357	bound_ortholog
423	ENSG00000117713	bound_ortholog
424	ENSG00000253729	bound_ortholog
425	ENSG00000150637	bound_ortholog
426	ENSG00000198604	bound_ortholog
427	ENSG00000168883	bound_ortholog
428	ENSG00000125633	bound_ortholog
429	ENSG00000173744	bound_ortholog
430	ENSG00000028528	bound_ortholog
431	ENSG00000122257	bound_ortholog
432	ENSG00000111665	bound_ortholog
433	ENSG00000173757	bound_ortholog
434	ENSG00000213064	bound_ortholog
435	ENSG00000151657	bound_ortholog
436	ENSG00000120837	bound_ortholog
437	ENSG00000165006	bound_ortholog
438	ENSG00000128989	bound_ortholog
439	ENSG00000008952	bound_ortholog
440	ENSG00000121281	bound_ortholog
441	ENSG00000087152	bound_ortholog
442	ENSG00000143368	bound_ortholog
443	ENSG00000133935	bound_ortholog
444	ENSG00000163527	bound_ortholog
445	ENSG00000197061	bound_ortholog
446	ENSG00000072364	bound_ortholog
447	ENSG00000143815	bound_ortholog
448	ENSG00000100811	bound_ortholog
449	ENSG00000029725	bound_ortholog
450	ENSG00000109971	bound_ortholog
451	ENSG00000147604	bound_ortholog
452	ENSG00000180008	bound_ortholog
453	ENSG00000167978	bound_ortholog
454	ENSG00000168092	bound_ortholog
455	ENSG00000105810	bound_ortholog
456	ENSG00000100644	bound_ortholog
457	ENSG00000153066	bound_ortholog
458	ENSG00000135045	bound_ortholog
459	ENSG00000164609	bound_ortholog
460	ENSG00000162402	bound_ortholog
461	ENSG00000115677	bound_ortholog
462	ENSG00000075624	bound_ortholog
463	ENSG00000104331	bound_ortholog
464	ENSG00000182117	bound_ortholog
465	ENSG00000101966	bound_ortholog
466	ENSG00000087095	bound_ortholog
467	ENSG00000087274	bound_ortholog
468	ENSG00000043143	bound_ortholog
469	ENSG00000114209	bound_ortholog
470	ENSG00000135870	bound_ortholog
471	ENSG00000083168	bound_ortholog
472	ENSG00000088179	bound_ortholog
473	ENSG00000188404	bound_ortholog
474	ENSG00000064666	bound_ortholog
475	ENSG00000179218	bound_ortholog
476	ENSG00000109572	bound_ortholog
477	ENSG00000135905	bound_ortholog
478	ENSG00000161542	bound_ortholog
479	ENSG00000051108	bound_ortholog
480	ENSG00000198876	bound_ortholog
481	ENSG00000005339	bound_ortholog
482	ENSG00000135048	bound_ortholog
483	ENSG00000173064	bound_ortholog
484	ENSG00000114978	bound_ortholog
485	ENSG00000048828	bound_ortholog
486	ENSG00000119906	bound_ortholog
487	ENSG00000171475	bound_ortholog
488	ENSG00000108587	bound_ortholog
489	ENSG00000102081	bound_ortholog
490	ENSG00000166483	bound_ortholog
491	ENSG00000132294	bound_ortholog
492	ENSG00000092439	bound_ortholog
493	ENSG00000157600	bound_ortholog
494	ENSG00000157212	bound_ortholog
495	ENSG00000163607	bound_ortholog
496	ENSG00000132002	bound_ortholog
497	ENSG00000109861	bound_ortholog
498	ENSG00000134419	bound_ortholog
499	ENSG00000184007	bound_ortholog
500	ENSG00000101347	bound_ortholog
501	ENSG00000154217	bound_ortholog
502	ENSG00000109475	bound_ortholog
503	ENSG00000090470	bound_ortholog
504	ENSG00000086475	bound_ortholog
505	ENSG00000108654	bound_ortholog
506	ENSG00000112308	bound_ortholog
507	ENSG00000034677	bound_ortholog
508	ENSG00000122566	bound_ortholog
509	ENSG00000115808	bound_ortholog
510	ENSG00000174442	bound_ortholog
511	ENSG00000131323	bound_ortholog
512	ENSG00000103653	bound_ortholog
513	ENSG00000111530	bound_ortholog
514	ENSG00000104765	bound_ortholog
515	ENSG00000122591	bound_ortholog
516	ENSG00000134851	bound_ortholog
517	ENSG00000115947	bound_ortholog
518	ENSG00000164587	bound_ortholog
519	ENSG00000140564	bound_ortholog
520	ENSG00000181904	bound_ortholog
521	ENSG00000139514	bound_ortholog
522	ENSG00000143418	bound_ortholog
523	ENSG00000124275	bound_ortholog
524	ENSG00000172575	bound_ortholog
525	ENSG00000198856	bound_ortholog
526	ENSG00000113387	bound_ortholog
527	ENSG00000173706	bound_ortholog
528	ENSG00000124575	bound_ortholog
529	ENSG00000156030	bound_ortholog
530	ENSG00000176915	bound_ortholog
531	ENSG00000104880	bound_ortholog
532	ENSG00000188042	bound_ortholog
533	ENSG00000137871	bound_ortholog
534	ENSG00000075415	bound_ortholog
535	ENSG00000159873	bound_ortholog
536	ENSG00000065883	bound_ortholog
537	ENSG00000150907	bound_ortholog
538	ENSG00000006125	bound_ortholog
539	ENSG00000119541	bound_ortholog
540	ENSG00000112237	bound_ortholog
541	ENSG00000171862	bound_ortholog
542	ENSG00000198087	bound_ortholog
543	ENSG00000111237	bound_ortholog
544	ENSG00000143324	bound_ortholog
545	ENSG00000132475	bound_ortholog
546	ENSG00000204392	bound_ortholog
547	ENSG00000153207	bound_ortholog
548	ENSG00000134294	bound_ortholog
549	ENSG00000104635	bound_ortholog
550	ENSG00000116406	bound_ortholog
551	ENSG00000089157	bound_ortholog
552	ENSG00000120738	bound_ortholog
553	ENSG00000059758	bound_ortholog
554	ENSG00000128340	bound_ortholog
555	ENSG00000113441	bound_ortholog
556	ENSG00000002834	bound_ortholog
557	ENSG00000134107	bound_ortholog
558	ENSG00000006459	bound_ortholog
559	ENSG00000153914	bound_ortholog
560	ENSG00000144560	bound_ortholog
561	ENSG00000069275	bound_ortholog
562	ENSG00000104517	bound_ortholog
563	ENSG00000176444	bound_ortholog
564	ENSG00000102879	bound_ortholog
565	ENSG00000176102	bound_ortholog
566	ENSG00000166801	bound_ortholog
567	ENSG00000131446	bound_ortholog
568	ENSG00000069974	bound_ortholog
569	ENSG00000166226	bound_ortholog
570	ENSG00000119314	bound_ortholog
571	ENSG00000171522	bound_ortholog
572	ENSG00000198862	bound_ortholog
573	ENSG00000174444	bound_ortholog
574	ENSG00000140395	bound_ortholog
575	ENSG00000137075	bound_ortholog
576	ENSG00000145390	bound_ortholog
577	ENSG00000197081	bound_ortholog
578	ENSG00000088930	bound_ortholog
579	ENSG00000167258	bound_ortholog
580	ENSG00000121542	bound_ortholog
581	ENSG00000093000	bound_ortholog
582	ENSG00000135974	bound_ortholog
583	ENSG00000125676	bound_ortholog
584	ENSG00000118007	bound_ortholog
585	ENSG00000197223	bound_ortholog
586	ENSG00000138448	bound_ortholog
587	ENSG00000140521	bound_ortholog
588	ENSG00000204628	bound_ortholog
589	ENSG00000083799	bound_ortholog
590	ENSG00000152558	bound_ortholog
591	ENSG00000122482	bound_ortholog
592	ENSG00000105323	bound_ortholog
593	ENSG00000113558	bound_ortholog
594	ENSG00000092964	bound_ortholog
595	ENSG00000156928	bound_ortholog
596	ENSG00000108424	bound_ortholog
597	ENSG00000163960	bound_ortholog
598	ENSG00000130816	bound_ortholog
599	ENSG00000134057	bound_ortholog
600	ENSG00000076928	bound_ortholog
601	ENSG00000158470	bound_ortholog
602	ENSG00000123636	bound_ortholog
603	ENSG00000171453	bound_ortholog
604	ENSG00000167904	bound_ortholog
605	ENSG00000215021	bound_ortholog
606	ENSG00000141367	bound_ortholog
607	ENSG00000143515	bound_ortholog
608	ENSG00000077458	bound_ortholog
609	ENSG00000116560	bound_ortholog
610	ENSG00000109062	bound_ortholog
611	ENSG00000090372	bound_ortholog
612	ENSG00000131473	bound_ortholog
613	ENSG00000108468	bound_ortholog
614	ENSG00000070756	bound_ortholog
615	ENSG00000120063	bound_ortholog
616	ENSG00000180879	bound_ortholog
617	ENSG00000152484	bound_ortholog
618	ENSG00000146223	bound_ortholog
619	ENSG00000134109	bound_ortholog
620	ENSG00000115977	bound_ortholog
621	ENSG00000152270	bound_ortholog
622	ENSG00000056586	bound_ortholog
623	ENSG00000135426	bound_ortholog
624	ENSG00000119720	bound_ortholog
625	ENSG00000118855	bound_ortholog
626	ENSG00000183496	bound_ortholog
627	ENSG00000162378	bound_ortholog
628	ENSG00000105939	bound_ortholog
629	ENSG00000186517	bound_ortholog
630	ENSG00000286522	bound_ortholog
631	ENSG00000164938	bound_ortholog
632	ENSG00000150527	bound_ortholog
633	ENSG00000077152	bound_ortholog
634	ENSG00000136731	bound_ortholog
635	ENSG00000114120	bound_ortholog
636	ENSG00000090060	bound_ortholog
637	ENSG00000082898	bound_ortholog
638	ENSG00000155324	bound_ortholog
639	ENSG00000101191	bound_ortholog
640	ENSG00000132182	bound_ortholog
641	ENSG00000153094	bound_ortholog
642	ENSG00000197442	bound_ortholog
643	ENSG00000151553	bound_ortholog
644	ENSG00000231925	bound_ortholog
645	ENSG00000162736	bound_ortholog
646	ENSG00000179476	bound_ortholog
647	ENSG00000100242	bound_ortholog
648	ENSG00000115163	bound_ortholog
649	ENSG00000172795	bound_ortholog
650	ENSG00000111684	bound_ortholog
651	ENSG00000197323	bound_ortholog
652	ENSG00000078747	bound_ortholog
653	ENSG00000123505	bound_ortholog
654	ENSG00000127152	bound_ortholog
655	ENSG00000043093	bound_ortholog
656	ENSG00000123124	bound_ortholog
657	ENSG00000168763	bound_ortholog
658	ENSG00000072518	bound_ortholog
659	ENSG00000153310	bound_ortholog
660	ENSG00000145425	bound_ortholog
661	ENSG00000108960	bound_ortholog
662	ENSG00000010810	bound_ortholog
663	ENSG00000198176	bound_ortholog
664	ENSG00000155313	bound_ortholog
665	ENSG00000159216	bound_ortholog
666	ENSG00000077721	bound_ortholog
667	ENSG00000128708	bound_ortholog
668	ENSG00000096060	bound_ortholog
669	ENSG00000101577	bound_ortholog
670	ENSG00000168906	bound_ortholog
671	ENSG00000067082	bound_ortholog
672	ENSG00000145780	bound_ortholog
673	ENSG00000113732	bound_ortholog
674	ENSG00000161405	bound_ortholog
675	ENSG00000080546	bound_ortholog
676	ENSG00000187764	bound_ortholog
677	ENSG00000114861	bound_ortholog
678	ENSG00000112282	bound_ortholog
679	ENSG00000221978	bound_ortholog
680	ENSG00000008988	bound_ortholog
681	ENSG00000030066	bound_ortholog
682	ENSG00000125952	bound_ortholog
683	ENSG00000131051	bound_ortholog
684	ENSG00000183726	bound_ortholog
685	ENSG00000178209	bound_ortholog
686	ENSG00000135245	bound_ortholog
687	ENSG00000130449	bound_ortholog
688	ENSG00000143549	bound_ortholog
689	ENSG00000275023	bound_ortholog
690	ENSG00000101109	bound_ortholog
691	ENSG00000184640	bound_ortholog
692	ENSG00000115652	bound_ortholog
693	ENSG00000198146	bound_ortholog
694	ENSG00000126003	bound_ortholog
695	ENSG00000101445	bound_ortholog
696	ENSG00000106003	bound_ortholog
697	ENSG00000147065	bound_ortholog
698	ENSG00000112078	bound_ortholog
699	ENSG00000213281	bound_ortholog
700	ENSG00000043514	bound_ortholog
701	ENSG00000138641	bound_ortholog
702	ENSG00000116852	bound_ortholog
703	ENSG00000109118	bound_ortholog
704	ENSG00000151692	bound_ortholog
705	ENSG00000125107	bound_ortholog
706	ENSG00000151689	bound_ortholog
707	ENSG00000175573	bound_ortholog
708	ENSG00000100503	bound_ortholog
709	ENSG00000143614	bound_ortholog
710	ENSG00000139641	bound_ortholog
711	ENSG00000136156	bound_ortholog
712	ENSG00000146414	bound_ortholog
713	ENSG00000108510	bound_ortholog
714	ENSG00000204576	bound_ortholog
715	ENSG00000165527	bound_ortholog
716	ENSG00000106723	bound_ortholog
717	ENSG00000106346	bound_ortholog
718	ENSG00000152818	bound_ortholog
719	ENSG00000204120	bound_ortholog
720	ENSG00000167106	bound_ortholog
721	ENSG00000133818	bound_ortholog
722	ENSG00000122862	bound_ortholog
723	ENSG00000110931	bound_ortholog
724	ENSG00000115307	bound_ortholog
725	ENSG00000131507	bound_ortholog
726	ENSG00000186352	bound_ortholog
727	ENSG00000148730	bound_ortholog
728	ENSG00000205765	bound_ortholog
729	ENSG00000187605	bound_ortholog
730	ENSG00000138795	bound_ortholog
731	ENSG00000116731	bound_ortholog
732	ENSG00000109674	bound_ortholog
733	ENSG00000138434	bound_ortholog
734	ENSG00000119138	bound_ortholog
735	ENSG00000143337	bound_ortholog
736	ENSG00000102753	bound_ortholog
737	ENSG00000107968	bound_ortholog
738	ENSG00000198837	bound_ortholog
739	ENSG00000125450	bound_ortholog
740	ENSG00000146963	bound_ortholog
741	ENSG00000134152	bound_ortholog
742	ENSG00000117868	bound_ortholog
743	ENSG00000143401	bound_ortholog
744	ENSG00000145495	bound_ortholog
745	ENSG00000169607	bound_ortholog
746	ENSG00000171681	bound_ortholog
747	ENSG00000168246	bound_ortholog
748	ENSG00000153922	bound_ortholog
749	ENSG00000153147	bound_ortholog
750	ENSG00000138767	bound_ortholog
751	ENSG00000215301	bound_ortholog
752	ENSG00000160014	bound_ortholog
753	ENSG00000109790	bound_ortholog
754	ENSG00000121644	bound_ortholog
755	ENSG00000107036	bound_ortholog
756	ENSG00000102054	bound_ortholog
757	ENSG00000084733	bound_ortholog
758	ENSG00000154727	bound_ortholog
759	ENSG00000174579	bound_ortholog
760	ENSG00000128609	bound_ortholog
761	ENSG00000011304	bound_ortholog
762	ENSG00000108599	bound_ortholog
763	ENSG00000115165	bound_ortholog
764	ENSG00000109805	bound_ortholog
765	ENSG00000179119	bound_ortholog
766	ENSG00000154945	bound_ortholog
767	ENSG00000120727	bound_ortholog
768	ENSG00000043462	bound_ortholog
769	ENSG00000103335	bound_ortholog
770	ENSG00000072415	bound_ortholog
771	ENSG00000084463	bound_ortholog
772	ENSG00000198730	bound_ortholog
773	ENSG00000182220	bound_ortholog
774	ENSG00000081913	bound_ortholog
775	ENSG00000107643	bound_ortholog
776	ENSG00000115020	bound_ortholog
777	ENSG00000100601	bound_ortholog
778	ENSG00000121879	bound_ortholog
779	ENSG00000082641	bound_ortholog
780	ENSG00000134905	bound_ortholog
781	ENSG00000123908	bound_ortholog
782	ENSG00000188994	bound_ortholog
783	ENSG00000156162	bound_ortholog
784	ENSG00000130402	bound_ortholog
785	ENSG00000157540	bound_ortholog
786	ENSG00000135269	bound_ortholog
787	ENSG00000110066	bound_ortholog
788	ENSG00000145675	bound_ortholog
789	ENSG00000274618	bound_ortholog
790	ENSG00000141664	bound_ortholog
791	ENSG00000077044	bound_ortholog
792	ENSG00000166949	bound_ortholog
793	ENSG00000170871	bound_ortholog
794	ENSG00000091317	bound_ortholog
795	ENSG00000005483	bound_ortholog
796	ENSG00000125629	bound_ortholog
797	ENSG00000095564	bound_ortholog
798	ENSG00000138081	bound_ortholog
799	ENSG00000110075	bound_ortholog
800	ENSG00000082258	bound_ortholog
801	ENSG00000109381	bound_ortholog
802	ENSG00000145386	bound_ortholog
803	ENSG00000181744	bound_ortholog
804	ENSG00000124789	bound_ortholog
805	ENSG00000139921	bound_ortholog
806	ENSG00000137818	bound_ortholog
807	ENSG00000153827	bound_ortholog
808	ENSG00000145569	bound_ortholog
809	ENSG00000165355	bound_ortholog
810	ENSG00000121774	bound_ortholog
811	ENSG00000139926	bound_ortholog
812	ENSG00000168438	bound_ortholog
813	ENSG00000101972	bound_ortholog
814	ENSG00000120333	bound_ortholog
815	ENSG00000184432	bound_ortholog
816	ENSG00000011114	bound_ortholog
817	ENSG00000114850	bound_ortholog
818	ENSG00000007168	bound_ortholog
819	ENSG00000186827	bound_ortholog
820	ENSG00000170776	bound_ortholog
821	ENSG00000115738	bound_ortholog
822	ENSG00000083642	bound_ortholog
823	ENSG00000012983	bound_ortholog
824	ENSG00000114796	bound_ortholog
825	ENSG00000072736	bound_ortholog
826	ENSG00000198668	bound_ortholog
827	ENSG00000184014	bound_ortholog
828	ENSG00000187257	bound_ortholog
829	ENSG00000121966	bound_ortholog
830	ENSG00000067560	bound_ortholog
831	ENSG00000101665	bound_ortholog
832	ENSG00000154822	bound_ortholog
833	ENSG00000153179	bound_ortholog
834	ENSG00000183291	bound_ortholog
835	ENSG00000184384	bound_ortholog
836	ENSG00000168646	bound_ortholog
837	ENSG00000198900	bound_ortholog
838	ENSG00000113384	bound_ortholog
839	ENSG00000164691	bound_ortholog
840	ENSG00000018510	bound_ortholog
841	ENSG00000198898	bound_ortholog
842	ENSG00000169032	bound_ortholog
843	ENSG00000196449	bound_ortholog
844	ENSG00000111348	bound_ortholog
845	ENSG00000152291	bound_ortholog
846	ENSG00000115524	bound_ortholog
847	ENSG00000110917	bound_ortholog
848	ENSG00000277075	bound_ortholog
849	ENSG00000118058	bound_ortholog
850	ENSG00000198821	bound_ortholog
851	ENSG00000131263	bound_ortholog
852	ENSG00000102096	bound_ortholog
853	ENSG00000177054	bound_ortholog
854	ENSG00000165516	bound_ortholog
855	ENSG00000168159	bound_ortholog
856	ENSG00000198055	bound_ortholog
857	ENSG00000204569	bound_ortholog
858	ENSG00000108094	bound_ortholog
859	ENSG00000134371	bound_ortholog
860	ENSG00000158406	bound_ortholog
861	ENSG00000197045	bound_ortholog
862	ENSG00000135090	bound_ortholog
863	ENSG00000138594	bound_ortholog
864	ENSG00000100425	bound_ortholog
865	ENSG00000211456	bound_ortholog
866	ENSG00000133794	bound_ortholog
867	ENSG00000134884	bound_ortholog
868	ENSG00000160551	bound_ortholog
869	ENSG00000170515	bound_ortholog
870	ENSG00000033800	bound_ortholog
871	ENSG00000122122	bound_ortholog
872	ENSG00000144746	bound_ortholog
873	ENSG00000108669	bound_ortholog
874	ENSG00000083896	bound_ortholog
875	ENSG00000115085	bound_ortholog
876	ENSG00000125347	bound_ortholog
877	ENSG00000080371	bound_ortholog
878	ENSG00000164054	bound_ortholog
879	ENSG00000071189	bound_ortholog
880	ENSG00000139687	bound_ortholog
881	ENSG00000153201	bound_ortholog
882	ENSG00000033030	bound_ortholog
883	ENSG00000143190	bound_ortholog
884	ENSG00000069424	bound_ortholog
885	ENSG00000012660	bound_ortholog
886	ENSG00000172375	bound_ortholog
887	ENSG00000163599	bound_ortholog
888	ENSG00000149428	bound_ortholog
889	ENSG00000196367	bound_ortholog
890	ENSG00000172845	bound_ortholog
891	ENSG00000162623	bound_ortholog
892	ENSG00000109320	bound_ortholog
893	ENSG00000038274	bound_ortholog
894	ENSG00000133561	bound_ortholog
895	ENSG00000185033	bound_ortholog
896	ENSG00000144713	bound_ortholog
897	ENSG00000100281	bound_ortholog
898	ENSG00000076321	bound_ortholog
899	ENSG00000106459	bound_ortholog
900	ENSG00000140497	bound_ortholog
901	ENSG00000146476	bound_ortholog
902	ENSG00000198911	bound_ortholog
903	ENSG00000120071	bound_ortholog
904	ENSG00000036549	bound_ortholog
905	ENSG00000111880	bound_ortholog
906	ENSG00000107929	bound_ortholog
907	ENSG00000127334	bound_ortholog
908	ENSG00000007968	bound_ortholog
909	ENSG00000136280	bound_ortholog
910	ENSG00000275302	bound_ortholog
911	ENSG00000203814	bound_ortholog
912	ENSG00000106799	bound_ortholog
913	ENSG00000118181	bound_ortholog
914	ENSG00000168036	bound_ortholog
915	ENSG00000109787	bound_ortholog
916	ENSG00000160255	bound_ortholog
917	ENSG00000162607	bound_ortholog
918	ENSG00000095370	bound_ortholog
919	ENSG00000122692	bound_ortholog
920	ENSG00000163719	bound_ortholog
921	ENSG00000173660	bound_ortholog
922	ENSG00000151702	bound_ortholog
923	ENSG00000064995	bound_ortholog
924	ENSG00000165119	bound_ortholog
925	ENSG00000198964	bound_ortholog
926	ENSG00000134444	bound_ortholog
927	ENSG00000162927	bound_ortholog
928	ENSG00000119669	bound_ortholog
929	ENSG00000167088	bound_ortholog
930	ENSG00000143119	bound_ortholog
931	ENSG00000137497	bound_ortholog
932	ENSG00000102908	bound_ortholog
933	ENSG00000067596	bound_ortholog
934	ENSG00000144802	bound_ortholog
935	ENSG00000115464	bound_ortholog
936	ENSG00000136167	bound_ortholog
937	ENSG00000177733	bound_ortholog
938	ENSG00000135655	bound_ortholog
939	ENSG00000185338	bound_ortholog
940	ENSG00000154001	bound_ortholog
941	ENSG00000138326	bound_ortholog
942	ENSG00000110395	bound_ortholog
943	ENSG00000111605	bound_ortholog
944	ENSG00000100664	bound_ortholog
945	ENSG00000127603	bound_ortholog
946	ENSG00000145740	bound_ortholog
947	ENSG00000106682	bound_ortholog
948	ENSG00000055044	bound_ortholog
949	ENSG00000130024	bound_ortholog
950	ENSG00000084093	bound_ortholog
951	ENSG00000062725	bound_ortholog
952	ENSG00000132603	bound_ortholog
953	ENSG00000114423	bound_ortholog
954	ENSG00000158417	bound_ortholog
955	ENSG00000170852	bound_ortholog
956	ENSG00000144136	bound_ortholog
957	ENSG00000153560	bound_ortholog
958	ENSG00000164463	bound_ortholog
959	ENSG00000003056	bound_ortholog
960	ENSG00000132549	bound_ortholog
961	ENSG00000138757	bound_ortholog
962	ENSG00000010818	bound_ortholog
963	ENSG00000099194	bound_ortholog
964	ENSG00000157106	bound_ortholog
965	ENSG00000077684	bound_ortholog
966	ENSG00000149273	bound_ortholog
967	ENSG00000185811	bound_ortholog
968	ENSG00000171848	bound_ortholog
969	ENSG00000106392	bound_ortholog
970	ENSG00000096384	bound_ortholog
971	ENSG00000197622	bound_ortholog
972	ENSG00000136709	bound_ortholog
973	ENSG00000189266	bound_ortholog
974	ENSG00000147162	bound_ortholog
975	ENSG00000170248	bound_ortholog
976	ENSG00000130826	bound_ortholog
977	ENSG00000139746	bound_ortholog
978	ENSG00000125735	bound_ortholog
979	ENSG00000139318	bound_ortholog
980	ENSG00000010610	bound_ortholog
981	ENSG00000167114	bound_ortholog
982	ENSG00000196504	bound_ortholog
983	ENSG00000234745	bound_ortholog
984	ENSG00000179632	bound_ortholog
985	ENSG00000064313	bound_ortholog
986	ENSG00000085224	bound_ortholog
987	ENSG00000174106	bound_ortholog
988	ENSG00000174243	bound_ortholog
989	ENSG00000139154	bound_ortholog
990	ENSG00000135486	bound_ortholog
991	ENSG00000099381	bound_ortholog
992	ENSG00000125686	bound_ortholog
993	ENSG00000134318	bound_ortholog
994	ENSG00000123144	bound_ortholog
995	ENSG00000187555	bound_ortholog
996	ENSG00000120948	bound_ortholog
997	ENSG00000128016	bound_ortholog
998	ENSG00000170266	bound_ortholog
999	ENSG00000121210	bound_ortholog
1000	ENSG00000137770	bound_ortholog
1001	ENSG00000173852	bound_ortholog
1002	ENSG00000074966	bound_ortholog
1003	ENSG00000126883	bound_ortholog
1004	ENSG00000167548	bound_ortholog
1005	ENSG00000099204	bound_ortholog
1006	ENSG00000156471	bound_ortholog
1007	ENSG00000138160	bound_ortholog
1008	ENSG00000134333	bound_ortholog
1009	ENSG00000111224	bound_ortholog
1010	ENSG00000161960	bound_ortholog
1011	ENSG00000147649	bound_ortholog
1012	ENSG00000109171	bound_ortholog
1013	ENSG00000168672	bound_ortholog
1014	ENSG00000163513	bound_ortholog
1015	ENSG00000189079	bound_ortholog
1016	ENSG00000102317	bound_ortholog
1017	ENSG00000144580	bound_ortholog
1018	ENSG00000067955	bound_ortholog
1019	ENSG00000109180	bound_ortholog
1020	ENSG00000117036	bound_ortholog
1021	ENSG00000107099	bound_ortholog
1022	ENSG00000058063	bound_ortholog
1023	ENSG00000174231	bound_ortholog
1024	ENSG00000152601	bound_ortholog
1025	ENSG00000153317	bound_ortholog
1026	ENSG00000127528	bound_ortholog
1027	ENSG00000143624	bound_ortholog
1028	ENSG00000197798	bound_ortholog
1029	ENSG00000172809	bound_ortholog
1030	ENSG00000155903	bound_ortholog
1031	ENSG00000140299	bound_ortholog
1032	ENSG00000138231	bound_ortholog
1033	ENSG00000169567	bound_ortholog
1034	ENSG00000073849	bound_ortholog
1035	ENSG00000204592	bound_ortholog
1036	ENSG00000184588	bound_ortholog
1037	ENSG00000167895	bound_ortholog
1038	ENSG00000109586	bound_ortholog
1039	ENSG00000134954	bound_ortholog
1040	ENSG00000145687	bound_ortholog
1041	ENSG00000035928	bound_ortholog
1042	ENSG00000198382	bound_ortholog
1043	ENSG00000177463	bound_ortholog
1044	ENSG00000181274	bound_ortholog
1045	ENSG00000134910	bound_ortholog
1046	ENSG00000274211	bound_ortholog
1047	ENSG00000108819	bound_ortholog
1048	ENSG00000056097	bound_ortholog
1049	ENSG00000152409	bound_ortholog
1050	ENSG00000113368	bound_ortholog
1051	ENSG00000153006	bound_ortholog
1052	ENSG00000149930	bound_ortholog
1053	ENSG00000164924	bound_ortholog
1054	ENSG00000196230	bound_ortholog
1055	ENSG00000109670	bound_ortholog
1056	ENSG00000138468	bound_ortholog
1057	ENSG00000164823	bound_ortholog
1058	ENSG00000189403	bound_ortholog
1059	ENSG00000179144	bound_ortholog
1060	ENSG00000113532	bound_ortholog
1061	ENSG00000196199	bound_ortholog
1062	ENSG00000131626	bound_ortholog
1063	ENSG00000155096	bound_ortholog
1064	ENSG00000253719	bound_ortholog
1065	ENSG00000163686	bound_ortholog
1066	ENSG00000135439	bound_ortholog
1067	ENSG00000182149	bound_ortholog
1068	ENSG00000075711	bound_ortholog
1069	ENSG00000132824	bound_ortholog
1070	ENSG00000138069	bound_ortholog
1071	ENSG00000100796	bound_ortholog
1072	ENSG00000112079	bound_ortholog
1073	ENSG00000198554	bound_ortholog
1074	ENSG00000075785	bound_ortholog
1075	ENSG00000105011	bound_ortholog
1076	ENSG00000163946	bound_ortholog
1077	ENSG00000114942	bound_ortholog
1078	ENSG00000244754	bound_ortholog
1079	ENSG00000178562	bound_ortholog
1080	ENSG00000100815	bound_ortholog
1081	ENSG00000135913	bound_ortholog
1082	ENSG00000166710	bound_ortholog
1083	ENSG00000172164	bound_ortholog
1084	ENSG00000147133	bound_ortholog
1085	ENSG00000131467	bound_ortholog
1086	ENSG00000092841	bound_ortholog
1087	ENSG00000110367	bound_ortholog
1088	ENSG00000061936	bound_ortholog
1089	ENSG00000089006	bound_ortholog
1090	ENSG00000184557	bound_ortholog
1091	ENSG00000076641	bound_ortholog
1092	ENSG00000131747	bound_ortholog
1093	ENSG00000163320	bound_ortholog
1094	ENSG00000112584	bound_ortholog
1095	ENSG00000112531	bound_ortholog
1096	ENSG00000005844	bound_ortholog
1097	ENSG00000118513	bound_ortholog
1098	ENSG00000126804	bound_ortholog
1099	ENSG00000186174	bound_ortholog
1100	ENSG00000198858	bound_ortholog
1101	ENSG00000078061	bound_ortholog
1102	ENSG00000066136	bound_ortholog
1103	ENSG00000005812	bound_ortholog
1104	ENSG00000115966	bound_ortholog
1105	ENSG00000108733	bound_ortholog
1106	ENSG00000111913	bound_ortholog
1107	ENSG00000205542	bound_ortholog
1108	ENSG00000146676	bound_ortholog
1109	ENSG00000181827	bound_ortholog
1110	ENSG00000156508	bound_ortholog
1111	ENSG00000107485	bound_ortholog
1112	ENSG00000205581	bound_ortholog
1113	ENSG00000155744	bound_ortholog
1114	ENSG00000145287	bound_ortholog
1115	ENSG00000172340	bound_ortholog
1116	ENSG00000175115	bound_ortholog
1117	ENSG00000184277	bound_ortholog
1118	ENSG00000114857	bound_ortholog
1119	ENSG00000108953	bound_ortholog
1120	ENSG00000117523	bound_ortholog
1121	ENSG00000137504	bound_ortholog
1122	ENSG00000158987	bound_ortholog
1123	ENSG00000102580	bound_ortholog
1124	ENSG00000140367	bound_ortholog
1125	ENSG00000135698	bound_ortholog
1126	ENSG00000143753	bound_ortholog
1127	ENSG00000137073	bound_ortholog
1128	ENSG00000021574	bound_ortholog
1129	ENSG00000167986	bound_ortholog
1130	ENSG00000154473	bound_ortholog
1131	ENSG00000022840	bound_ortholog
1132	ENSG00000198265	bound_ortholog
1133	ENSG00000067900	bound_ortholog
1134	ENSG00000163840	bound_ortholog
1135	ENSG00000149532	bound_ortholog
1136	ENSG00000176986	bound_ortholog
1137	ENSG00000198517	bound_ortholog
1138	ENSG00000185591	bound_ortholog
1139	ENSG00000139163	bound_ortholog
1140	ENSG00000134744	bound_ortholog
1141	ENSG00000142669	bound_ortholog
1142	ENSG00000166598	bound_ortholog
1143	ENSG00000013441	bound_ortholog
1144	ENSG00000156482	bound_ortholog
1145	ENSG00000136141	bound_ortholog
1146	ENSG00000152242	bound_ortholog
1147	ENSG00000141646	bound_ortholog
1148	ENSG00000175063	bound_ortholog
1149	ENSG00000138802	bound_ortholog
1150	ENSG00000111596	bound_ortholog
1151	ENSG00000027697	bound_ortholog
[truncated: 1,817 more rows]

## Sheet: 04_mouse_anybiotype_genes
	ensembl_id	label
[truncated: 2,136 more rows]

[truncated: 5 more sheets: 05_human_3UTR_genes, 06_mouse_3UTR_genes, 07_human_3UTR_peaks, 08_mouse_3UTR_peaks, 09_orthologies]
