# Supplementary material for: ROQUIN-1 binding to the transcriptome of T cells reveals conserved targets in the control of lymphopoiesis
Source: Research Square preprint supplement (doi:10.21203/rs.3.rs-6931797/v1), 2025-07-15
Supplement: Supplementary file 2 [file 8a44f0669730fbf7219f23ed.xlsx]

## Sheet: 00_README
	Supplementary Table – Motifs characterization : README This sheet contains description of the two sheets 01_HUMAN and 02_MOUSE related to the characterization of motifs identified de novo in subsets of Roquin peaks (see Material & Methods for details). The two sheets correspond to tables reporting for each motif ID (in the format “M<four-digit-number>”, column “motif_id”) one or more motif identi…

## Sheet: 01_HUMAN
motif_id	db_motif_id	cor	Ncor	consensus	symbol
M0000	ornament.A2BP1.1.7	0.964	0.689	wGCAT..	RBFOX1
M0000	ornament.RBFOX2.1.275	0.934	0.667	wGCAT..	RBFOX2
M0000	ornament.RBFOX3.1.276	0.922	0.659	wGCAT..	RBFOX3
M0000	ornament.NOVA1.1.209	0.753	0.538	..TTCAT	NOVA1
M0000	ornament.SNRPA.5.370	0.733	0.524	..TGCAC	SNRPA
M0001	ornament.ELAVL1.4.67	0.818	0.584	TTkrT..	ELAVL1
M0001	ornament.RBM23.2.300	0.74	0.529	..TTrAc	RBM23
M0001	ornament.HNRNPAB.1.120	0.716	0.511	waGAT..	HNRNPAB
M0001	ornament.ELAVL1.3.66	0.708	0.505	.TTgKT.	ELAVL1
M0001	ornament.ELAVL1.2.65	0.7	0.5	.TtGTT.	ELAVL1
M0002	ornament.RBM41.1.309	0.915	0.654	yTACw..	RBM41
M0002	ornament.BOLL.3.17	0.825	0.589	TTAkT..	BOLL
M0002	ornament.RBM41.3.311	0.821	0.586	wTACw..	RBM41
M0002	ornament.TIA1.2.419	0.788	0.563	..TTAtt	TIA1
M0002	ornament.RBM15B.2.296	0.768	0.549	.TTAwT.	RBM15B
M0003	ornament.SAMD4A.1.345	0.813	0.58	.CkGGm.	SAMD4A
M0003	ornament.PCBP2.3.238	0.742	0.53	CCGGT..	PCBP2
M0003	ornament.SRSF4.2.384	0.733	0.524	..CTGCT	SRSF4
M0004	ornament.A1CF.6.6	0.946	0.676	.TAATT.	A1CF
M0004	ornament.HNRNPDL.1.130	0.937	0.67	TAATT..	HNRNPDL
M0004	ornament.DAZAP1.3.52	0.922	0.659	TAAgt..	DAZAP1
M0004	ornament.ELAVL4.3.71	0.902	0.644	.TaAkT.	ELAVL4
M0004	ornament.RBM15B.2.296	0.9	0.643	..TAwTT	RBM15B
M0005	ornament.SRSF8.1.391	0.714	0.555	gcAGCag	SRSF8
M0005	ornament.RC3H1.3.338	0.758	0.455	wCYGTK.	RC3H1
M0005	ornament.RBM24.1.301	0.736	0.442	gcTTTT.	RBM24
M0005	ornament.SRSF5.4.389	0.701	0.42	.GCAGCm	SRSF5
M0006	ornament.SRSF5.4.389	0.861	0.738	wGCAGC.	SRSF5
M0006	ornament.SRSF10.1.398	0.861	0.738	wGCAGC.	SRSF10
M0006	ornament.SRSF2.1.379	0.842	0.722	aGCAGC.	SRSF2
M0006	ornament.SRSF11.1.400	0.814	0.698	.AGCAGm	SRSF11
M0006	ornament.EWSR1.4.89	0.795	0.681	GGCAGG.	EWSR1
M0007	ornament.ELAVL1.4.67	0.938	0.67	..krTTT	ELAVL1
M0007	ornament.RBM24.1.301	0.783	0.559	gcTTT..	RBM24
M0007	ornament.ELAVL1.2.65	0.773	0.552	..tGTTT	ELAVL1
M0007	ornament.SRSF4.3.385	0.733	0.524	GGTGT..	SRSF4
M0007	ornament.SFPQ.7.359	0.715	0.511	..rGTkk	SFPQ
M0008	ornament.DAZ3.6.49	0.952	0.68	.TTcTa.	DAZ3
M0008	ornament.PUF60.2.259	0.802	0.573	.TTCTc.	PUF60
M0008	ornament.CPEB1.1.39	0.723	0.516	..TTTTA	CPEB1
M0008	ornament.QKI.2.270	0.712	0.509	TACTA..	QKI
M0010	ornament.LIN28A.2.183	0.76	0.543	.GGAGG.	LIN28A
M0010	ornament.BRUNOL6.1.22	0.76	0.543	..TGkkG	CELF6
M0010	ornament.SRSF1.5.377	0.743	0.531	GGRGG..	SRSF1
M0010	ornament.SRSF1.4.376	0.721	0.515	GGAGG..	SRSF1
M0010	ornament.SRSF1.3.375	0.721	0.515	GGAGG..	SRSF1
M0011	ornament.G3BP2.1.108	0.73	0.522	AGGAT..	G3BP2
M0011	ornament.SAMD4A.1.345	0.731	0.522	..kGGmc	SAMD4A
M0011	ornament.HNRNPAB.1.120	0.714	0.51	waGAT..	HNRNPAB
M0012	ornament.FUBP1.2.96	0.965	0.689	..TGTAT	FUBP1
M0012	ornament.PUM1.1.267	0.957	0.683	TGTAh..	PUM1
M0012	ornament.KHSRP.1.178	0.952	0.68	.TGTaT.	KHSRP
M0012	ornament.FUBP1.4.98	0.827	0.591	..TGTwt	FUBP1
M0012	ornament.TARDBP.1.409	0.796	0.568	aGTRT..	TARDBP
M0013	ornament.Rbm38.1.308	0.936	0.728	kKGTGTg	RBM38
M0013	ornament.BRUNOL5.1.21	0.915	0.712	TGTGTGt	CELF5
M0013	ornament.BRUNOL4.1.20	0.908	0.706	tGTGTkk	CELF4
M0013	ornament.RBM24.2.302	0.897	0.698	gtGTGTg	RBM24
M0013	ornament.ENSDARG00000058818.1.73	0.892	0.694	gWGTGTG	rbm38
M0014	ornament.ELAVL1.3.66	0.858	0.858	TTTgKTT	ELAVL1
M0014	ornament.ELAVL1.2.65	0.838	0.838	TTtGTTT	ELAVL1
M0014	ornament.ELAVL1.5.68	0.81	0.81	TTTTTTT	ELAVL1
M0014	ornament.HNRNPC.1.121	0.808	0.808	tTTTTTT	HNRNPC
M0014	ornament.PUF60.1.258	0.806	0.806	TTTyTTT	PUF60
M0015	ornament.HNRNPC.1.121	0.975	0.487	tTTTTTT	HNRNPC
M0015	ornament.TRNAU1AP.1.427	0.975	0.487	twTTTTt	TRNAU1AP
M0015	ornament.ELAVL1.5.68	0.957	0.478	TTTTTTT	ELAVL1
M0015	ornament.HNRNPCL1.1.124	0.95	0.475	TTTTTwt	HNRNPCL1
M0015	ornament.TIA1.1.418	0.948	0.474	TTTwTTT	TIA1
M0016	ornament.HNRNPC.1.121	0.975	0.402	tTTTTTT	HNRNPC
M0016	ornament.HNRNPCL1.1.124	0.974	0.401	TTTTTwt	HNRNPCL1
M0017	ornament.HNRNPC.1.121	0.987	0.432	tTTTTTT	HNRNPC
M0017	ornament.ELAVL1.5.68	0.976	0.427	TTTTTTT	ELAVL1
M0017	ornament.PUF60.1.258	0.963	0.421	TTTyTTT	PUF60
M0017	ornament.TIA1.1.418	0.959	0.42	TTTwTTT	TIA1
M0017	ornament.HNRNPCL1.1.124	0.961	0.42	TTTTTwt	HNRNPCL1
M0018	ornament.DAZ3.1.44	0.908	0.795	aCAGTTk	DAZ3
M0018	ornament.CNOT4.4.36	0.769	0.673	AACAGtw	CNOT4
M0018	ornament.HNRNPA0.2.112	0.713	0.475	tArTTA.	HNRNPA0
M0018	ornament.ENOX1.1.72	0.876	0.438	..gACAG	ENOX1

## Sheet: 02_MOUSE
motif_id	db_motif_id	cor	Ncor	consensus	symbol
M0000	ornament.EWSR1.3.88	0.911	0.781	kGGGGT.	Ewsr1
M0000	ornament.HNRNPA2B1.2.118	0.848	0.727	rGGGGt.	Hnrnpa2b1
M0000	ornament.HNRNPF.3.134	0.845	0.725	aGGGGw.	Hnrnpf
M0000	ornament.ESRP2.1.83	0.804	0.69	TGGGGA.	Esrp2
M0000	ornament.HNRNPH2.2.136	0.763	0.654	.GGGGGw	Hnrnph2
M0001	ornament.PUF60.2.259	0.959	0.685	..TCTct	Puf60
M0001	ornament.PTBP3.1.256	0.763	0.545	..TTTCT	Ptbp3
M0001	ornament.RBM6.1.289	0.715	0.51	..TCCCt	Rbm6
M0002	ornament.A1CF.6.6	1	0.714	.TAATT.	A1cf
M0002	ornament.HNRNPDL.1.130	0.983	0.702	TAATT..	Hnrnpdl
M0002	ornament.HNRNPD.1.127	0.981	0.701	.TAATT.	Hnrnpd
M0002	ornament.A1CF.1.1	0.963	0.688	.tAATt.	A1cf
M0002	ornament.RBM15B.2.296	0.958	0.685	..TAwTT	Rbm15b
M0003	ornament.ILF2.3.167	0.753	0.659	ATGGkGg	Ilf2
M0003	ornament.FUS.1.101	0.954	0.636	GGTGGC.	Fus
M0003	ornament.ESRP1.2.81	0.739	0.492	GGkGGT.	Esrp1
M0004	ornament.RC3H1.2.337	0.78	0.78	ccTATgg	Rc3h1
M0004	ornament.CELF1.1.24	0.723	0.723	TgTtTGT	Celf1
M0004	ornament.RBMS2.3.326	0.733	0.549	mTATTT.	Rbms2
M0004	ornament.BOLL.2.16	0.915	0.509	TgTGT..	Boll
M0004	ornament.FUBP1.2.96	0.869	0.483	wATGT..	Fubp1
M0005	ornament.HNRNPC.1.121	0.989	0.433	tTTTTTT	Hnrnpc
M0005	ornament.ELAVL1.5.68	0.978	0.428	TTTTTTT	Elavl1
M0005	ornament.HNRNPCL1.1.124	0.971	0.425	TTTTTwt	Hnrnpc
M0005	ornament.PUF60.1.258	0.956	0.418	TTTyTTT	Puf60
M0005	ornament.TIA1.1.418	0.946	0.414	TTTwTTT	Tia1
M0006	ornament.SAMD4A.1.345	0.741	0.635	GCkGGm.	Samd4
M0009	ornament.BRUNOL5.1.21	0.966	0.828	.GTGTGt	Celf5
M0009	ornament.RBM24.2.302	0.964	0.826	gtGTGT.	Rbm24
M0009	ornament.ENSDARG00000058818.1.73	0.958	0.821	gWGTGT.	Rbm38
M0009	ornament.Rbm38.1.308	0.948	0.813	kKGTGT.	Rbm38
M0009	ornament.BRUNOL4.1.20	0.944	0.809	.GTGTkk	Celf4
