# Supplementary material for: ROQUIN-1 binding to the transcriptome of T cells reveals conserved targets in the control of lymphopoiesis
Source: Research Square preprint supplement (doi:10.21203/rs.3.rs-6931797/v1), 2025-07-15
Supplement: Supplementary file 3 [file 8dc8d1471195e2b1ea72df2e.xlsx]

## Sheet: Sheet1
	Bone Marrow - Phenotyping
	Marker	Fluorescent Tag	Clone	Dilution	Cat#	Company	RRID
	CD11b	BV480	M1/70	400	414-0112-82	invitrogen	AB_2925614
	Ter-119	BUV496	Ter-119	100	741079	BD Pharmingen	AB_2870685
	CD161 (NK1.1)	BUV563	PK136	400	741233	BD Pharmingen	AB_2870785
	IgM	BUV615	Il/41	100	751479	BD Pharmingen	AB_2875475
	TCR b	BUV395	H57-597	400	569248	BD Pharmingen
	CD4	BUV661	GK1.5	200	376-0041-80	invitrogen	AB_2942137
	CD8	BV750	53-6.7	400	747134	BD Pharmingen	AB_2871881
	Sca-1	BV650	D7	800	108143	Biolegend	AB_2629684
	CD135 (FLT3)	PE	A2F10	200	135305	Biolegend	AB_1877217
	CD19	BV711	6D5	400	115555	Biolegend	AB_2565970
	CD117 (c-kit)	BV421	QA17A09	50	155109	Biolegend	AB_2800691
	CD25	PE-Cy7	3C7	50	101916	Biolegend	AB_2616761
	IgD	PE-Dazzle 594	11-26c2a	800	405741	Biolegend	AB_2571985
	CD3	APC-Fire 810	17A2	200	100268	Biolegend	AB_2876392
	CD44	BV570	IM7	800	103037	Biolegend	AB_10900641
	CD43	PE-Cy5	1B11	400	121216	Biolegend	AB_528811
	CD11c	FITC	N418	400	11-0114-81	eBioscience	AB_464939
	Gr-1	PerCP-Cy5.5	RB6-8C5	200	108428	Biolegend	AB_893558
	CD127	BUV737	A7R34	50	367-1271-80	invitrogen	AB_2895994
	CD24	PerCP-eFluor 710	M1/69	800	46-0242-80	invitrogen	AB_1834426
	MHC Class II (I-Ab)	eFluor 450	M5/114.15.2	800	48-5321-80	invitrogen	AB_1272241
	CD45R (B220)	BV605	RA3-6B2	100	103243	Biolegend	AB_11203907
	TCR gd	Super Bright 780	eBioGL3	100	78-5711-82	invitrogen	AB_2744919
	PAX5	BV510	1H9	100	563191	BD Pharmingen	AB_2738058
	ID2	APC	ILCID2	800	17-9475-80	invitrogen	AB_2735050
	Thymocytes - Phenotyping
	Marker	Fluorescent Tag	Clone	Dilution	Cat#	Company	RRID
	CD28	BB700	37.51	100	566512	BD Pharmingen	AB_2869776
	TCRgd	APC	eBioGL3	200	17-5711-82	eBioscience	AB_842756
	CD24	BV605	M1/69	800	101827	Biolegend	AB_2563464
	CD69	PE-Cy7	H12F3	400	25-0691-82	invitrogen	AB_469637
	CD11c	BUV737	N418	200	367-0114-82	invitrogen	AB_2895935
	CD62L (L-Selectin)	eFluor 450	Mel-14	800	48-0621-80	invitrogen	AB_1963591
	Gr-1	Super Bright 645	RB6-8C5	200	64-5931-82	invitrogen	AB_2662805
	CD25	Alexa Fluor 488	PC61	100	102017	Biolegend	AB_893558
	TCR b	BUV395	H57-597	400	569248	BD Pharmingen
	Ter-119	BUV496	Ter-119	100	741079	BD Pharmingen	AB_2870685
	NK1.1	BUV563	PK136	400	741233	BD Pharmingen	AB_2870785
	CD4	BUV661	GK1.5	200	376-0041-80	invitrogen	AB_2942137
	CD117 (c-kit)	BV421	QA17A09	100	155109	Biolegend	AB_2800691
	CD11b	BV480	M1/70	400	414-0112-82	invitrogen	AB_2925614
	CD44	BV570	IM7	400	103037	Biolegend	AB_10900641
	CD19	BV711	6D5	800	115555	Biolegend	AB_2565970
	CD8	BV750	53-6.7	400	747134	BD Pharmingen	AB_2871881
	CD3	APC-Fire 810	17A2	400	100268	Biolegend	AB_2876392
	Helios	RY586	22F6	400	568527	BD Pharmingen
	Thymocytes preTCRα staining
	Marker	Fluorescent Tag	Clone	Dilution	Cat#	Company	RRID
	NK1.1	BUV563	PK136	400	741233	BD Pharmingen	AB_2870785
	CD4	BUV661	GK1.5	200	376-0041-80	invitrogen	AB_2942137
	CD11c	BUV737	N418	200	367-0114-82	invitrogen	AB_2895935
	CD11b	BV480	M1/70	400	414-0112-82	invitrogen	AB_2925614
	CD44	BV570	IM7	400	103037	Biolegend	AB_10900641
	CD24	BV605	M1/69	800	101827	Biolegend	AB_2563464
	Gr-1	Super Bright 645	RB6-8C5	400	64-5931-82	invitrogen	AB_2662805
	CD19	BV711	6D5	800	115555	Biolegend	AB_2565970
	CD8	BV750	53-6.7	400	747134	BD Pharmingen	AB_2871881
	TCRgd	SB780	eBioGL3	200	78-5711-82	invitrogen	AB_2744919
	CD25	Alexa Fluor 488	PC61	100	102017	Biolegend	AB_493334
	CD28	BB700	37.51	100	566512	BD Pharmingen	AB_2869776
	preTCRalpha	N/A	2F5	100	552407	BD Pharmingen	AB_394381
	Biotion antiIgG1	N/A	A85-1	100	553441	BD Pharmingen	AB_394861
	Streptavidin	PE	N/A	1000	12-4317-87	eBioscience	N/A
	TCR b (i.c.)	R718	H57-597	200	567299	BD Pharmingen
	CD3	APC-Fire 810	17A2	400	100268	Biolegend	AB_2876392
	Viability	eF780		10000
	Brilliant Stainig Buffer			10
	Sorting
	BM
	Marker	Fluorophore	Clone	Dilution	Cat#	Company	RRID
	viability	eF780		10000
	CD117	APC	ACK2	50	135108	Biolegend	AB_2028407
	CD127	PE	A7R34	25	12-1271-82	invitrogen	AB_465844
	Sca1	BV650	D7	100	108143	Biolegend	AB_2629684
	CD135	BV421	A2F10	25	135315	Biolegend	AB_2562338
	B220	FITC	RA3-6B2	200	11-0452-82	eBioscience	AB_465054
	CD19	BV711	6D5	200	115555	Biolegend	AB_2565970
	CD43	PE-Cy5	1B11	400	121216	Biolegend	AB_528811
	IgM	PE-Cy7	RMM-1	200	406513	Biolegend	AB_10642031
	TCRgd	PE-Cy7	GL7	200	118123	Biolegend	AB_11203530
	NK1.1	PE-Cy7	PK136	200	108713	Biolegend	AB_389363
	CD11c	PE-Cy7	N418	400	117317	Biolegend	AB_493568
	CD11b	PE-Cy7	M1/70	400	101215	Biolegend	AB_312798
	CD19	PE-Cy7	6D5	400	115519	Biolegend	AB_313654
	Gr1	PE-Cy7	RB6-8C5	400	108415	Biolegend	AB_313380
	Thymus
	Marker	Fluorophore	Clone	Dilution	Cat#	Company	RRID
	viability	eF780		10000
	CD4	APC	GK1.5	400	17-0041-81	eBioscience	AB_469319
	CD8	eF450	53-6.7	400	48-0081-82	eBioscience	AB_1272198
	CD44	FITC	IM7	200	11-0441-82	invitrogen	AB_465045
	CD25	PE	PC61	200	553866	BD	AB_395101
	TCRgd	PE-Cy7	GL7	200	118123	Biolegend	AB_11203530
	NK1.1	PE-Cy7	PK136	200	108713	Biolegend	AB_389363
	CD11c	PE-Cy7	N418	400	117317	Biolegend	AB_493568
	CD11b	PE-Cy7	M1/70	400	101215	Biolegend	AB_312798
	CD19	PE-Cy7	6D5	400	115519	Biolegend	AB_313654
	Gr1	PE-Cy7	RB6-8C5	400	108415	Biolegend	AB_313380
	Reporter-Assays in B and T cells
	Marker	Fluorophore	Clone	Dilution	Cat#	Company	RRID
	viability	eF780		2000
	CD19	V450	6D5	400	115526	Biolegend	AB_493341
	Nfkbid	APC	4C1	400		in House production
	Icos	APC	C398.4A	400	313509	Biolegend	AB_416333
