# Supplementary material for: ROQUIN-1 binding to the transcriptome of T cells reveals conserved targets in the control of lymphopoiesis
Source: Research Square preprint supplement (doi:10.21203/rs.3.rs-6931797/v1), 2025-07-15
Supplement: Supplementary file 4 [file 9779cf441f122d30683a2c9a.xlsx]

## Sheet: species Fig. 3e
	Species used for LocARNA study in Figure 3e
	====	Glire subset:
	Mouse	Mus musculus	GRCm38/mm10
	Guinea pig	Cavia porcellus	Broad/cavPor3
	Kangaroo rat	Dipodomys ordii	Broad/dipOrd1
	Naked mole-rat	Heterocephalus glaber	Broad HetGla_female_1.0/hetGla2
	Pika	Ochotona princeps	Broad/ochPri2
	Rabbit	Oryctolagus cuniculus	Broad/oryCun2
	Rat	Rattus norvegicus	RGSC 5.0/rn5
	Squirrel	Spermophilus tridecemlineatus	Broad/speTri2
	====	Euarchontoglire subset, includes the glire subset above plus:
	Tree shrew	Tupaia belangeri	Broad/tupBel1
	Marmoset	Callithrix jacchus	WUGSC 3.2/calJac3
	Gorilla	Gorilla gorilla	gorGor3
	Human	Homo sapiens	GRCh37/hg19
	Mouse lemue	Microcebus murinus	Broad/micMur1
	Gibbon	Nomascus leucogenys	GGSC Nleu1.1/nomLeu2
	Bushbaby	Otolemur garnettii	Broad/otoGar3
	Chimp	Pan troglodytes	Pan_troglodytes-2.1.4/panTro4
	Baboon	Papio hamadryas	Baylor 1.0/papHam1
	Orangutan	Pongo pygmaeus abelii	WUGSC 2.0.2/ponAbe2
	Chinese rhesus	Macaca mulatta	BGI CR_1.0/rheMac3
	Squirrel monkey	Saimiri boliviensis	saiBol1
	Tarsier	Tarsius syrichta	Broad/tarSyr1
	====	Placental subset, includes the glire and euarchontoglire subsets above plus:
	Panda	Ailuropoda melanoleuca	BGI-Shenzhen 1.0/ailMel1
	Cow	Bos taurus	Baylor Btau_4.6.1/bosTau7
	Dog	Canis lupus familiaris	Broad/canFam3)
	Sloth	Choloepus hoffmanni	Broad//choHof1
	Armadillo	Dasypus novemcinctus	Armadillo/dasNov3
	Tenrec	Echinops telfairi	Broad/echTel1
	Horse	Equus caballus	Broad/equCab2
	Hedgehog	Erinaceus europaeus	Broad/eriEur1
	Cat	Felis catus	ICGSC Felis_catus 6.2/felCat5
	Elephant	Loxodonta africana	Broad/loxAfr3
	Microbat	Myotis lucifugus	Broad/myoLuc2
	Sheep	Ovis aries	ISGC/oviAri1
	Rock hyrax	Procavia capensis	Broad/proCap1
	Megabat	Pteropus vampyrus	Broad/pteVam1
	Shrew	Sorex araneus	Broad/sorAra1
	Pig	Sus scrofa	SGSC Sscrofa10.2/susScr3
	Manatee	Trichechus manatus latirostris	Broad v1.0/triMan1
	Dolphin	Tursiops truncatos	Baylor Ttru_1.4/turTru2
	Alpaca	Vicugna pacos	Broad/vicPac1
	====	the rest of the vertebrates with above complete the full 60-way species:
	Lizard	Anolis carolinensis	Broad/anoCar2
	Painted turtle	Chrysemys picta bellii	v3.0.1/chrPic1
	Zebrafish	Danio rerio	Zv9/danRer7
	Fugu	Takifugu rubripes	FUGU5/fr3
	Atlantic cod	Gadus morhua	Genofisk GadMor_May2010/gadMor1
	Chicken	Gallus gallus	ICGSC Gallus_gallus-4.0/galGal4
	Stickleback	Gasterosteus aculeatus	Broad/gasAcu1
	Coelacanth	Latimeria chalumnae	latCha1
	Wallaby	Macropus eugenii	TWGS Meug_1.1/macEug2
	Turkey	Meleagris gallopavo	TGC Turkey_2.01/melGal1
	Budgerigar	Melopsittacus undulatus	WUSTL v6.3/melUnd1
	Opossum	Monodelphis domestica	Broad/monDom5
	Nile tilapia	Oreochromis niloticus	Nile tilapia/oreNil2
	Platypus	Ornithorhynchus anatinus	WUGSC 5.0.1/ornAna1
	Medaka	Oryzias latipes	NIG/UT MEDAKA1/oryLat2
	Lamprey	Petromyzon marinus	WUGSC 3.0/petMar1
	Tasmanian devil	Sarcophilus harrisii	WTSI Devil_ref v7.0/sarHar1
	Zebra finch	Taeniopygia guttata	WUGSC 3.2.4/taeGut1
	Tetraodon	Tetraodon nigroviridis	Genoscope 8.0/tetNig2
	X. tropcicalis	Xenopus tropicalis	JGI 4.2/xenTro3

## Sheet: species Fig. 3f
	Species used for LocARNA analysis of Zc3h12a 3´-UTR
	(Figure 3f)
	Rat	Rattus norvegicus	RGSC 5.0/rn5
	Mouse	Mus musculus	GRCm38/mm10
	Chinese hamster	Cricetulus griseus	CriGri_1.0
	Naked mole-rat	Heterocephalus glaber	Broad HetGla_female_1.0/hetGla2
	Rabbit	Oryctolagus cuniculus	Broad/oryCun2
	Bonobo	Pan Paniscus	Mhudiblu_PPA_v0
	Chimp	Pan troglodytes	Pan_troglodytes-2.1.4/panTro4
	Human	Homo sapiens	GRCh37/hg19
	Gibbon	Nomascus leucogenys	GGSC Nleu1.1/nomLeu2
	rhesus macaque	Macaca mulatta	Mmul_10
	Olive baboon	Papio anubis	Panubis1.0
	Marmoset	Callithrix jacchus	WUGSC 3.2/calJac3
	Philippine tarsier	Carlito syrichta	Tarsius_syrichta-2.0.1
	Bushbaby	Otolemur garnettii	Broad/otoGar3
	Chinese tree shrew	Tupaia chinensis	TupChi_1.0
	Shrew	Sorex araneus	Broad/sorAra1
	European hedgehog	Erinaceus europaeus	EriEur2.0
	Domestic goat	Capra hircus	ARS1.2
	Sheep	Ovis aries	ISGC/oviAri1
	Cow	Bos taurus	Baylor Btau_4.6.1/bosTau7
	Alpaca	Vicugna pacos	Broad/vicPac1
	Cat	Felis catus	ICGSC Felis_catus 6.2/felCat5
	ferret	Mustela putorius furo	JCVI
	Microbat	Myotis lucifugus	Broad/myoLuc2
	Elephant	Loxodonta africana	Broad/loxAfr3

## Sheet: species Ext. Fig 5
Species used for LocARNA of Id family 3´-UTR analysis
(Extended data Figure 5)
Assembly Accession	Assembly Name	Organism Name
GCF_003709585.1	Aci_jub_2	Acinonyx jubatus
GCF_002007445.2	ASM200744v3	Ailuropoda melanoleuca
GCF_000455745.1	ASM45574v1	Alligator sinensis
GCF_010909765.2	sAmbRad1.1.pri	Amblyraja radiata
GCF_016432865.1	AdamAnt_v2	Antechinus flavipes
GCF_011762505.1	mArvNil1.pat.X	Arvicanthis niloticus
GCF_000493695.1	BalAcu1.0	Balaenoptera acutorostrata scammoni
GCF_000754665.1	Bison_UMD1.0	Bison bison bison
GCF_003369695.1	UOA_Brahman_1	Bos indicus x Bos taurus
GCF_000298355.1	BosGru_v2.0	Bos mutus
GCF_002263795.2	ARS-UCD1.3	Bos taurus
GCF_019923935.1	NDDB_SH_1	Bubalus bubalis
GCF_009663435.1	Callithrix_jacchus_cj1700_1.1	Callithrix jacchus
GCF_000803125.2	CamDro3	Camelus dromedarius
GCF_009834535.1	BCGSAC_Cfer_1.0	Camelus ferus
GCF_003254725.2	ASM325472v2	Canis lupus dingo
GCF_014441545.1	ROS_Cfam_1.0	Canis lupus familiaris
GCF_001704415.2	ARS1.2	Capra hircus
GCF_001984765.1	C.can genome v1.0	Castor canadensis
GCF_000151735.1	Cavpor3.0	Cavia porcellus
GCF_001604975.1	Cebus_imitator-1.0	Cebus imitator
GCF_000283155.1	CerSimSim1.0	Ceratotherium simum simum
GCF_000276665.1	ChiLan1.0	Chinchilla lanigera
GCF_015252025.1	Vero_WHO_p1.0	Chlorocebus sabaeus
GCF_000296735.1	ChrAsi1.0	Chrysochloris asiatica
GCF_000260355.1	ConCri1.0	Condylura cristata
GCF_000223135.1	CriGri_1.0	Cricetulus griseus
GCF_000208655.3	Dasnov3.2	Dasypus novemcinctus
GCF_000313985.2	ASM31398v2	Echinops telfairi
GCF_000299155.1	EleEdw1.0	Elephantulus edwardii
GCF_024166365.1	mEleMax1 primary haplotype	Elephas maximus indicus
GCF_000308155.1	EptFus1.0	Eptesicus fuscus
GCF_016077325.2	ASM1607732v2	Equus asinus
GCF_002863925.1	EquCab3.0	Equus caballus
GCF_000696695.1	Burgud	Equus przewalskii
GCF_021613505.1	UCLA_HA_Equagga_1.0	Equus quagga
GCF_000296755.1	EriEur2.0	Erinaceus europaeus
GCF_018350175.1	F.catus_Fca126_mat1.0	Felis catus
GCF_012274545.1	DMR_v1.0_HiC	Fukomys damarensis
GCF_000696425.1	G_variegatus-3.0.2	Galeopterus variegatus
GCF_016699485.2	bGalGal1.mat.broiler.GRCg7b	Gallus gallus
GCF_001447785.1	Gekko_japonicus_V1.1	Gekko japonicus
GCF_008122165.1	Kamilah_GGO_v0	Gorilla gorilla gorilla
GCF_016433145.1	AgileGrace	Gracilinanus agilis
GCF_001891065.2	H_comes_QL1_v1.1	Hippocampus comes
GCF_000001405.40	GRCh38.p14	Homo sapiens
GCF_016881025.1	HiC_Itri_2	Ictidomys tridecemlineatus
GCF_020740685.1	mJacJac1.mat.Y.cur	Jaculus jaculus
GCF_018350155.1	O.geoffroyi_Oge1_pat1.0	Leopardus geoffroyi
GCF_000349705.1	LepWed1.0	Leptonychotes weddellii
GCF_000442215.1	Lipotes_vexillifer_v1	Lipotes vexillifer
GCF_000001905.1	Loxafr3.0	Loxodonta africana
GCF_012559485.2	MFA1912RKSv2	Macaca fascicularis
GCF_003339765.1	Mmul_10	Macaca mulatta
GCF_000956065.1	Mnem_1.0	Macaca nemestrina
GCF_000951045.1	Mleu.le_1.0	Mandrillus leucophaeus
GCF_021218885.1	Marmota_monax_Labrador192_V1.0	Marmota monax
GCF_922984935.1	mMelMel3.1 paternal haplotype	Meles meles
GCF_017639785.1	BCM_Maur_2.0	Mesocricetus auratus
GCF_014885135.2	M_Fortis_MF-2015_v1.1	Microtus fortis
GCF_000317375.1	MicOch1.0	Microtus ochrogaster
GCF_000002295.2	MonDom5	Monodelphis domestica
GCF_900094665.1	CAROLI_EIJ_v1.1	Mus caroli
GCF_000001635.27	GRCm39	Mus musculus
GCF_900095145.1	PAHARI_EIJ_v1.1	Mus pahari
GCF_009829155.1	mMusErm1.Pri	Mustela erminea
GCF_011764305.1	ASM1176430v1.1	Mustela putorius furo
GCF_000412655.1	ASM41265v1	Myotis brandtii
GCF_000327345.1	ASM32734v1	Myotis davidii
GCF_000147115.1	Myoluc2.0	Myotis lucifugus
GCF_000622305.1	S.galili_v1.0	Nannospalax galili
GCF_006542625.1	Asia_NLE_v1	Nomascus leucogenys
GCF_014633375.1	OchPri4.0	Ochotona princeps
GCF_000260255.1	OctDeg1.0	Octodon degus
GCF_000321225.1	Oros_1.0	Odobenus rosmarus divergens
GCF_903995425.1	mOncTor1.1	Onychomys torridus
GCF_937001465.1	mOrcOrc1.1	Orcinus orca
GCF_004115215.2	mOrnAna1.pri.v4	Ornithorhynchus anatinus
GCF_000298275.1	OryAfe1.0	Orycteropus afer afer
GCF_009806435.1	UM_NZW_1.0	Oryctolagus cuniculus
GCF_000181295.1	OtoGar3	Otolemur garnettii
GCF_016772045.1	ARS-UI_Ramb_v2.0	Ovis aries
GCF_013052645.1	Mhudiblu_PPA_v0	Pan paniscus
GCF_002880755.1	Clint_PTRv2	Pan troglodytes
GCF_018350215.1	P.leo_Ple1_pat1.1	Panthera leo
GCF_001857705.1	PanPar1.0	Panthera pardus
GCF_018350195.1	P.tigris_Pti1_mat1.1	Panthera tigris
GCF_008728515.1	Panubis1.0	Papio anubis
GCF_023159225.1	ASM2315922v1	Perognathus longimembris pacificus
GCF_943737965.1	PHOROB	Phodopus roborovskii
GCF_002837175.2	ASM283717v2	Physeter catodon
GCF_002880775.1	Susie_PABv2	Pongo abelii
GCF_016509475.1	Fcat_Pben_1.1_paternal_pri	Prionailurus bengalensis
GCF_000325575.1	ASM32557v1	Pteropus alecto
GCF_003327715.1	PumCon1.0	Puma concolor
GCF_000186305.1	Python_molurus_bivittatus-5.0.2	Python bivittatus
GCF_015227675.2	mRatBN7.2	Rattus norvegicus
GCF_011064425.1	Rrattus_CSIRO_v1	Rattus rattus
GCF_007565055.1	ASM756505v1	Rhinopithecus roxellana
GCF_902148845.1	fSalaFa1.1	Salarias fasciatus
GCF_902635505.1	mSarHar1.11	Sarcophilus harrisii
GCF_000181275.1	SorAra2.0	Sorex araneus
GCF_006229205.1	meerkat_22Aug2017_6uvM2_HiC	Suricata suricatta
GCF_000003025.6	Sscrofa11.1	Sus scrofa
GCF_000243295.1	TriManLat1.0	Trichechus manatus latirostris
GCF_000334495.1	TupChi_1.0	Tupaia chinensis
GCF_011762595.1	mTurTru1.mat.Y	Tursiops truncatus
GCF_003426925.1	ASM342692v1	Urocitellus parryii
GCF_017311325.1	ASM1731132v1	Ursus maritimus
GCF_000164845.4	VicPac3.2	Vicugna pacos
GCF_018345385.1	ASM1834538v1	Vulpes lagopus
GCF_017654675.1	Xenopus_laevis_v10.1	Xenopus laevis
