# Supplementary material for: ROQUIN-1 binding to the transcriptome of T cells reveals conserved targets in the control of lymphopoiesis
Source: Research Square preprint supplement (doi:10.21203/rs.3.rs-6931797/v1), 2025-07-15
Supplement: Supplementary file 5 [file e144fb8573209851b1d635b9.xlsx]

## Sheet: Mouse
CD4+	CD8	TH17	TH0	TReg	B	MEF
1110004F10Rik	0610009B22Rik	0610030E20Rik	0610030E20Rik	0610030E20Rik	0610030E20Rik	0610030E20Rik
1700064H15Rik	0610030E20Rik	1110004F10Rik	1110004F10Rik	1110004F10Rik	1110004F10Rik	1110004F10Rik
2410004B18Rik	1110004F10Rik	1110038F14Rik	1110051M20Rik	1600014C10Rik	1110051M20Rik	1110038F14Rik
2610002M06Rik	1110032F04Rik	1110051M20Rik	1110059G10Rik	1700064H15Rik	1110059E24Rik	1110051M20Rik
2610507B11Rik	1110038F14Rik	1110059G10Rik	1700064H15Rik	1810013L24Rik	1110059G10Rik	1700064H15Rik
4930453N24Rik	1110059E24Rik	1500011B03Rik	1700066B19Rik	2410002F23Rik	1700017B05Rik	1810013L24Rik
4930523C07Rik	1110059G10Rik	1600014C10Rik	1810030O07Rik	2410004B18Rik	1700064H15Rik	1810037I17Rik
8030462N17Rik	1190007I07Rik	1700010I14Rik	1810037I17Rik	2610002M06Rik	1810013L24Rik	2310022B05Rik
9530068E07Rik	1500009L16Rik	1700025G04Rik	2410002F23Rik	2610021A01Rik	2310022A10Rik	2410004B18Rik
AI467606	1500011B03Rik	1700064H15Rik	2410004B18Rik	2610507B11Rik	2310061I04Rik	2610001J05Rik
AI597479	1600014C10Rik	1700066B19Rik	2510039O18Rik	3300002I08Rik	2410004B18Rik	2610507B11Rik
AI837181	1700012P22Rik	1700109H08Rik	2610002M06Rik	4930523C07Rik	2510039O18Rik	2700081O15Rik
AW549877	1700017B05Rik	1700123O20Rik	3300002I08Rik	4931428F04Rik	2610001J05Rik	3110082I17Rik
Aak1	1700025G04Rik	1810013L24Rik	4921524J17Rik	4932438A13Rik	2610002M06Rik	3300002I08Rik
Aars2	1700030K09Rik	1810030O07Rik	4930453N24Rik	8030462N17Rik	2610021A01Rik	4931428F04Rik
Abcb7	1700064H15Rik	1810037I17Rik	4931428F04Rik	9530068E07Rik	2610507B11Rik	9530068E07Rik
Abcb9	1700066B19Rik	2010315B03Rik	4932438A13Rik	9930111J21Rik2	3110082I17Rik	AI597479
Abce1	1700109H08Rik	2310061I04Rik	6030458C11Rik	A630001G21Rik	4833420G17Rik	AW549877
Abhd6	1700123O20Rik	2410002F23Rik	6430571L13Rik	AI467606	4833439L19Rik	AW554918
Abi1	1810013L24Rik	2410004B18Rik	8030462N17Rik	AI597479	4930523C07Rik	Aaas
Abi2	1810030O07Rik	2510039O18Rik	9530068E07Rik	AI837181	4932438A13Rik	Aacs
Abl2	1810037I17Rik	2610001J05Rik	9930111J21Rik2	AW549877	5730455P16Rik	Aars2
Ablim1	2210016F16Rik	2610002M06Rik	A630001G21Rik	AW554918	5730480H06Rik	Abcb7
Abracl	2210408I21Rik	2610021A01Rik	AB124611	Aak1	8030462N17Rik	Abcc1
Abtb2	2310011J03Rik	2610507B11Rik	AI467606	Aamp	9430038I01Rik	Abcc5
Acbd3	2310022A10Rik	2700049A03Rik	AI597479	Aars2	9530068E07Rik	Abcd3
Acin1	2310033P09Rik	2700097O09Rik	AI837181	Aasdhppt	A630001G21Rik	Abce1
Acly	2310061I04Rik	3110009E18Rik	AU041133	Abcb7	AB124611	Abcg2
Acsl5	2410002F23Rik	3110082I17Rik	AW549877	Abcb9	AC147806.2	Abhd17c
Actb	2410004B18Rik	3300002I08Rik	Aaas	Abcc1	AI413582	Abhd6
Actn4	2510009E07Rik	4833420G17Rik	Aak1	Abce1	AI467606	Abi1
Actr2	2510039O18Rik	4833439L19Rik	Aamp	Abcf2	AI597479	Abi2
Adam10	2610001J05Rik	4921524J17Rik	Aars2	Abcg2	AW549877	Abl2
Adam17	2610002M06Rik	4930402H24Rik	Abcb7	Abhd13	Aak1	Abracl
Adam19	2610021A01Rik	4930430F08Rik	Abcb9	Abhd17b	Aamp	Acaca
Adamts6	2610301B20Rik	4930453N24Rik	Abcc1	Abhd6	Aars	Acap2
Adcy6	2610507B11Rik	4930503L19Rik	Abce1	Abi1	Aars2	Acat2
Adcy7	2700049A03Rik	4930523C07Rik	Abcg2	Abi2	Aatf	Acbd3
Add1	2700081O15Rik	4930579G24Rik	Abhd17b	Abi3	Abcb10	Acin1
Add3	2700097O09Rik	4931428F04Rik	Abhd17c	Abl2	Abcb7	Acly
Adgre5	3110082I17Rik	4932438A13Rik	Abhd2	Ablim1	Abcc1	Acsl4
Adgrl1	3300002I08Rik	4933430I17Rik	Abhd6	Abtb2	Abce1	Acsl5
Adipor1	4833420G17Rik	5730480H06Rik	Abi1	Acadvl	Abcg1	Acta2
Adnp2	4833439L19Rik	5830411N06Rik	Abi2	Acbd3	Abhd13	Actb
Ado	4921524J17Rik	6030458C11Rik	Abi3	Acin1	Abhd17b	Actg1
Aebp2	4930453N24Rik	6430571L13Rik	Abl1	Acly	Abhd17c	Actn1
Aff4	4930503L19Rik	8030462N17Rik	Abl2	Aco1	Abhd2	Actn4
Agap2	4930523C07Rik	9530068E07Rik	Ablim1	Acot9	Abi1	Actr1a
Agfg1	4930579G24Rik	9930021J03Rik	Abr	Acsl4	Abi3	Actr2
Agfg2	4931406P16Rik	9930111J21Rik2	Abracl	Acsl5	Abl1	Actr3
Aggf1	4931428F04Rik	A030005L19Rik	Abraxas1	Acsm2	Abl2	Acvr1
Ago1	4932438A13Rik	A630001G21Rik	Abtb2	Actb	Ablim1	Adam10
Ago2	5730480H06Rik	AA467197	Acadvl	Actg1	Abr	Adam17
Ago3	6030458C11Rik	AB124611	Acap1	Actr10	Abracl	Adam23
Agpat2	6430571L13Rik	AI413582	Acap2	Actr1a	Abtb2	Adam9
Agps	8030462N17Rik	AI467606	Acbd3	Actr2	Acaca	Adamts1
Agtpbp1	9130019O22Rik	AI597479	Acin1	Actr3	Acadl	Adamts20
Ahctf1	9430038I01Rik	AI837181	Acly	Adam10	Acap2	Adamts5
Akap10	9530068E07Rik	AI987944	Aco1	Adam17	Acat2	Adamts6
Akap13	9930012K11Rik	AU040320	Aco2	Adam19	Acbd3	Adamts8
Akap8	9930021J03Rik	AU041133	Acot9	Adamts6	Acbd5	Adamtsl3
Akirin1	9930111J21Rik2	AW549877	Acp5	Adamts8	Acin1	Adcy1
Alg5	A130010J15Rik	AW554918	Acsl4	Adck5	Acly	Adcy6
Alkbh1	A630001G21Rik	Aaas	Acsl5	Adcy6	Aco2	Adcy7
Amd1	A630089N07Rik	Aacs	Actb	Adcy7	Acox3	Add1
Anapc1	AA467197	Aadacl2fm2	Actg1	Add1	Acsf2	Adgra2
Anapc4	AB124611	Aak1	Actn4	Add3	Acsl3	Adgrg2
Ankfy1	AI467606	Aamp	Actr1a	Adgre5	Acsl4	Adgrl1
Ankhd1	AI597479	Aars2	Actr2	Adgrl1	Acsl5	Adgrl2
Ankle2	AI837181	Aasdhppt	Actr3	Adipor1	Acss1	Adipor1
Ankrd11	AI987944	Aatf	Actr6	Adipor2	Actb	Adnp2
Ankrd13a	AU040320	Abca2	Acvr1b	Adnp2	Actg1	Ado
Ankrd13c	AU041133	Abcb7	Adam10	Ado	Actn4	Adrb1
Ankrd37	AW549877	Abcb9	Adam17	Adss	Actr10	Aebp2
Ankrd40	AW554918	Abcc1	Adam19	Aebp2	Actr1a	Afap1
Ankrd44	Aaas	Abcc5	Adamts6	Aff1	Actr2	Afdn
Ankrd50	Aacs	Abcd3	Adamts8	Aff3	Actr3	Aff1
Anp32e	Aak1	Abce1	Adck5	Aff4	Actr6	Aff4
Anxa2	Aamp	Abcf1	Adcy6	Afg1l	Acvr1b	Afm
Aopep	Aar2	Abcf2	Adcy7	Aftph	Adam10	Agap1
Ap1b1	Aars	Abcg1	Add1	Agap2	Adam17	Agfg2
Ap1g1	Aars2	Abcg2	Add3	Agfg1	Adam19	Aggf1
Ap1s3	Aasdhppt	Abcg3	Adgre5	Aggf1	Adam9	Ago1
Ap2b1	Aatf	Abhd10	Adgrl1	Ago1	Adamts1	Ago2
Apobec3	Abca2	Abhd13	Adipor1	Ago2	Adamts6	Agpat2
Appbp2	Abca3	Abhd17b	Adipor2	Ago3	Adamts8	Agps
Aqr	Abca7	Abhd17c	Adk	Agpat2	Adap1	Agrn
Araf	Abcb10	Abhd18	Adnp2	Agps	Adat2	Ahctf1
Arcn1	Abcb1b	Abhd2	Ado	Agtpbp1	Adcy7	Ahcyl1
Arf6	Abcb6	Abhd4	Adprm	Ahctf1	Add1	Ahdc1
Arfgap2	Abcb7	Abhd5	Adss	Ahcyl2	Add3	Ahnak
Arfgap3	Abcb9	Abhd6	Aebp2	Ahnak	Adgre5	Ahr
Arfip1	Abcc1	Abhd8	Aff1	Ahr	Adi1	Aifm2
Arfrp1	Abcc5	Abi1	Aff3	Ak4	Adipor1	Ak5
Arglu1	Abcd3	Abi2	Aff4	Akap10	Adipor2	Ak6
Arhgap11a	Abce1	Abi3	Afg3l2	Akap11	Adnp2	Akap10
Arhgap15	Abcf1	Abl1	Aftph	Akap13	Ado	Akap11
Arhgap21	Abcf2	Abl2	Agap2	Akap8	Adprm	Akap12
Arhgap30	Abcg2	Ablim1	Agfg1	Akap9	Aebp2	Akap13
Arhgap9	Abhd10	Abr	Agfg2	Akirin1	Aff1	Akap8
Arhgdib	Abhd13	Abracl	Aggf1	Akr1b10	Aff3	Akt3
Arhgef1	Abhd15	Abraxas1	Ago1	Akt3	Aff4	Aldh1a1
Arhgef18	Abhd16a	Abtb1	Ago2	Aldoa	Aftph	Aldh1a2
Arhgef3	Abhd17b	Abtb2	Agpat2	Alg5	Agap2	Aldh7a1
Arhgef6	Abhd17c	Acaa2	Agps	Alg6	Agfg1	Alg10b
Arid1a	Abhd18	Acaca	Agtpbp1	Alkbh1	Aggf1	Alg6
Arid1b	Abhd2	Acad8	Ahctf1	Alkbh5	Ago1	Alkbh5
Arid2	Abhd4	Acadl	Ahcyl1	Als2cl	Ago2	Alms1
Arid4a	Abhd6	Acads	Ahcyl2	Alyref	Agpat4	Alyref
Arid4b	Abi1	Acadvl	Ahnak	Ambra1	Ahctf1	Amd1
Arih1	Abi2	Acap1	Ak2	Amd1	Ahcyl1	Ammecr1
Arl2bp	Abi3	Acap2	Ak4	Amn1	Ahcyl2	Amn1
Arl4c	Abl1	Acat2	Akap10	Anapc1	Ahdc1	Amotl2
Arl5b	Abl2	Acbd3	Akap11	Anapc2	Ahnak	Anapc1
Arl6ip1	Ablim1	Acbd5	Akap13	Ank3	Ahr	Anapc2
Arl6ip5	Abr	Acer3	Akap8	Ankfy1	Ahsa1	Anapc4
Arl8b	Abracl	Acin1	Akap9	Ankhd1	Aida	Ank2
Armc1	Abraxas1	Acly	Akirin1	Ankrd11	Aim2	Ankfy1
Armcx4	Abraxas2	Aco1	Akirin2	Ankrd13c	Ak2	Ankrd1
Armt1	Abtb1	Aco2	Akna	Ankrd27	Akap10	Ankrd10
Arntl	Abtb2	Acot9	Akr1a1	Ankrd37	Akap11	Ankrd11
Arpc1a	Acaa2	Acox3	Akt1	Ankrd40	Akap13	Ankrd13c
Arpc2	Acaca	Acp2	Akt3	Ankrd44	Akap8	Ankrd17
Arpc4	Acad9	Acp5	Aldoa	Ankrd50	Akap9	Ankrd27
Arpc5	Acadl	Acsf2	Alg10b	Anp32a	Akirin1	Ankrd37
Arpc5l	Acadm	Acsl3	Alg5	Anp32e	Akirin2	Ankrd40
Arpp19	Acads	Acsl4	Alg6	Antxr2	Akna	Ankrd50
Arrdc3	Acadsb	Acsl5	Alkbh1	Anxa2	Akr1a1	Ankrd52
Arsb	Acadvl	Acsm2	Alkbh5	Anxa5	Akt1	Anln
Asap1	Acap1	Acss1	Alms1	Aopep	Akt2	Ano6
Asb6	Acap2	Actb	Als2cl	Ap1ar	Akt3	Anp32a
Asf1a	Acat1	Actg1	Alyref	Ap1b1	Alcam	Anp32b
Asf1b	Acat2	Actl6a	Ambra1	Ap1g1	Aldh2	Anp32e
Ash1l	Acbd3	Actn1	Amd1	Ap1s3	Aldh7a1	Antxr1
Aspm	Acbd5	Actn4	Amfr	Ap2b1	Aldoa	Anxa1
Asxl2	Acer3	Actr10	Ammecr1	Ap3d1	Alg10b	Anxa2
Atad1	Acin1	Actr1a	Amn1	Ap4s1	Alg11	Anxa3
Atad2	Acly	Actr2	Anapc1	Apaf1	Alkbh1	Anxa5
Atad5	Aco1	Actr3	Anapc2	Apbb1ip	Alkbh5	Aopep
Atf2	Aco2	Actr6	Anapc4	Apc	Alms1	Ap1ar
Atf7ip	Acot9	Actr8	Angel2	Apobec3	Alpl	Ap1g1
Atl3	Acox3	Acvr1b	Angptl4	Appbp2	Alyref	Ap2a2
Atp10a	Acsf2	Acvr2a	Ank3	Appl1	Ambra1	Ap2b1
Atp11b	Acsl3	Acvrl1	Ankfy1	Aqp3	Amd1	Apaf1
Atp11c	Acsl4	Acyp1	Ankhd1	Aqr	Amfr	Apbb2
Atp13a3	Acsl5	Adal	Ankle2	Arap1	Amigo2	Apc
Atp1a1	Acsm2	Adam10	Ankrd11	Arap2	Amn1	Apex2
Atp1b3	Acss2	Adam17	Ankrd12	Arcn1	Anapc1	Aplp2
Atp2a2	Actb	Adam19	Ankrd13a	Arf1	Anapc5	Apobec3
Atp2b1	Actg1	Adam9	Ankrd13c	Arf3	Angel2	App
Atp2c1	Actg2	Adamts6	Ankrd16	Arf4	Ankfy1	Appbp2
Atp5a1	Actl6a	Adamts8	Ankrd27	Arf5	Ankhd1	Appl1
Atp5b	Actn4	Adamtsl3	Ankrd37	Arf6	Ankib1	Aqr
Atp5c1	Actr10	Adamtsl4	Ankrd40	Arfgap2	Ankrd11	Araf
Atp5g1	Actr1a	Adar	Ankrd44	Arfgef1	Ankrd12	Arcn1
Atp5g3	Actr2	Adarb1	Ankrd50	Arfip1	Ankrd13a	Arf1
Atp6ap2	Actr3	Adarb2	Ankrd52	Arfrp1	Ankrd13c	Arf3
Atp6v0a2	Actr3b	Adck1	Anp32a	Arglu1	Ankrd17	Arf4
Atp6v0b	Actr5	Adck5	Anp32b	Arhgap1	Ankrd28	Arf5
Atp6v0e	Actr6	Adcy2	Anp32e	Arhgap11a	Ankrd33b	Arf6
Atp6v1b2	Acvr1	Adcy6	Anxa2	Arhgap12	Ankrd37	Arfgap3
Atp6v1f	Acvr1b	Adcy7	Anxa6	Arhgap15	Ankrd40	Arfgef1
Atp8b2	Acvrl1	Add1	Anxa7	Arhgap21	Ankrd44	Arfip1
Atp9b	Adam10	Add3	Aopep	Arhgap25	Ankrd46	Arfrp1
Atrx	Adam17	Adgrb2	Ap1ar	Arhgap26	Ankrd50	Arglu1
Atxn1	Adam19	Adgre5	Ap1b1	Arhgap27	Ankrd52	Arhgap10
Atxn2l	Adam9	Adgrl1	Ap1g1	Arhgap30	Anks1	Arhgap21
Atxn3	Adamts6	Adi1	Ap1s3	Arhgap4	Anp32a	Arhgap23
Atxn7l3	Adamts8	Adipor1	Ap2a2	Arhgap5	Anp32b	Arhgap29
Atxn7l3b	Adamtsl3	Adipor2	Ap2b1	Arhgap9	Anp32e	Arhgap35
Aup1	Adap1	Adk	Ap2s1	Arhgdia	Anxa7	Arhgap42
Axin2	Adar	Adnp2	Ap3s1	Arhgdib	Ap1ar	Arhgap5
Azi2	Adarb1	Ado	Apaf1	Arhgef1	Ap1g1	Arhgdia
Azin1	Adarb2	Adora2b	Apc	Arhgef18	Ap1m1	Arhgef10l
B230219D22Rik	Adat1	Adpgk	Api5	Arhgef3	Ap1s1	Arhgef12
B2m	Adck1	Adprh	Aplp2	Arhgef38	Ap1s3	Arid1a
B3galt4	Adck5	Adprm	Apobec3	Arhgef6	Ap2b1	Arid1b
B4galnt4	Adcy2	Adsl	Appbp2	Arid1a	Ap2s1	Arid2
B4galt1	Adcy6	Adss	Appl1	Arid1b	Ap3b1	Arid4b
B4galt5	Adcy7	Aebp2	Aptx	Arid2	Ap4s1	Arid5b
BC005537	Add1	Aff1	Aqr	Arid4a	Apaf1	Arih1
Babam2	Add3	Aff3	Ar	Arid4b	Apbb1ip	Arih2
Bach1	Adgrb2	Aff4	Araf	Arid5a	Apc	Arl13b
Bach2	Adgre5	Afg1l	Arap1	Arid5b	Aph1a	Arl15
Bag1	Adgrg5	Afg3l2	Arap2	Arih1	Api5	Arl5b
Bard1	Adgrl1	Afm	Arcn1	Arih2	Aplp2	Arl6ip5
Baz1a	Adi1	Aftph	Arel1	Arl13b	Apmap	Arl6ip6
Baz2b	Adipor1	Agap2	Arf1	Arl15	Apobec1	Arl8a
Bcas2	Adipor2	Agap3	Arf3	Arl2bp	Apobec3	Arl8b
Bcl11b	Adk	Agbl3	Arf4	Arl4c	App	Armc1
Bcl2	Adnp2	Agfg1	Arf5	Arl5b	Appbp2	Armc8
Bcl2l11	Ado	Agfg2	Arf6	Arl6ip1	Appl1	Armcx4
Bcl9l	Adora2b	Aggf1	Arfgap2	Arl6ip5	Aptx	Armh3
Bcor	Adpgk	Agk	Arfgef1	Arl8a	Aqp7	Armt1
Bcorl1	Adprh	Ago1	Arfgef2	Arl8b	Aqr	Arnt
Bdp1	Adrb1	Ago2	Arfip1	Armc1	Arap2	Arpc1a
Bhlhe40	Adsl	Ago3	Arfrp1	Armc8	Arcn1	Arpc4
Bicd2	Adss	Agpat1	Arglu1	Armt1	Arel1	Arpc5
Birc5	Aebp2	Agpat2	Arhgap1	Arntl	Arf1	Arpp19
Birc6	Aen	Agpat3	Arhgap10	Arpc1a	Arf3	Arrdc3
Blm	Afap1l1	Agpat5	Arhgap11a	Arpc2	Arf4	Arsj
Bloc1s6	Aff1	Agps	Arhgap15	Arpc4	Arf5	Asah1
Bmi1	Aff3	Agrp	Arhgap21	Arpc5	Arf6	Asap1
Bmpr1a	Aff4	Agtpbp1	Arhgap25	Arpc5l	Arfgap2	Asf1a
Bms1	Afg1l	Agtrap	Arhgap30	Arrdc3	Arfgap3	Ash1l
Bmt2	Afg3l2	Ahctf1	Arhgap4	Arsb	Arfgef1	Asns
Bnip2	Aftph	Ahcyl1	Arhgap45	Art2b	Arfgef2	Aspm
Bnip3l	Agap2	Ahcyl2	Arhgap5	Asap1	Arfip1	Asxl1
Bptf	Agap3	Ahdc1	Arhgap9	Asb3	Arfrp1	Asxl2
Brat1	Agbl3	Ahnak	Arhgdia	Asb6	Arglu1	Atad1
Brd1	Agfg1	Ahr	Arhgdib	Asf1a	Arhgap1	Atad2
Brd4	Agfg2	Ahsa1	Arhgef1	Ash1l	Arhgap11a	Atad2b
Brd8	Aggf1	Aifm1	Arhgef3	Aspm	Arhgap15	Atad5
Btaf1	Agk	Aim2	Arhgef38	Asxl2	Arhgap19	Atf2
Btbd7	Ago1	Aip	Arhgef6	Atad1	Arhgap21	Atf4
Btg1	Ago2	Ak3	Arid1a	Atad2b	Arhgap25	Atf6
Btg2	Ago3	Ak4	Arid1b	Atf2	Arhgap30	Atf7ip
Btla	Agpat1	Ak6	Arid2	Atf7ip	Arhgap45	Atg4c
Bub3	Agpat2	Akap1	Arid4a	Atg16l1	Arhgdia	Atl2
Bzw1	Agpat3	Akap10	Arid4b	Atl3	Arhgdib	Atl3
C1d	Agpat5	Akap11	Arid5a	Atp10a	Arhgef1	Atp11b
C1galt1	Agps	Akap12	Arid5b	Atp11b	Arhgef11	Atp13a3
C2cd2l	Agrp	Akap13	Arih1	Atp11c	Arhgef12	Atp1a1
Cab39l	Agtpbp1	Akap8	Arih2	Atp13a3	Arhgef3	Atp1b1
Cacna1a	Agtrap	Akap8l	Arl13b	Atp1a1	Arhgef6	Atp2a2
Calcrl	Ahctf1	Akap9	Arl14ep	Atp1b1	Arid1a	Atp2b1
Calhm2	Ahcyl1	Akirin1	Arl15	Atp1b3	Arid1b	Atp2c1
Calm1	Ahcyl2	Akirin2	Arl2bp	Atp2a2	Arid2	Atp5a1
Calm3	Ahdc1	Akna	Arl4c	Atp2a3	Arid3a	Atp5b
Calr	Ahnak	Akr1a1	Arl5a	Atp2b1	Arid3b	Atp5c1
Camk1d	Ahr	Akr1b10	Arl5b	Atp2c1	Arid4a	Atp5g1
Camk4	Ahrr	Akr1c13	Arl6ip1	Atp5a1	Arid4b	Atp5g3
Camkk2	Ahsa1	Akr1e1	Arl6ip5	Atp5b	Arid5a	Atp6ap1
Cand1	Ahsa2	Akt1	Arl6ip6	Atp5c1	Arid5b	Atp6ap2
Canx	Aida	Akt2	Arl8a	Atp5e	Arih1	Atp6v0b
Capn1	Aifm1	Akt3	Arl8b	Atp5g1	Arih2	Atp6v0c
Capn2	Aim2	Alcam	Armc1	Atp5mpl	Arl1	Atp6v0d1
Capns1	Ak2	Aldh2	Armc8	Atp5pb	Arl15	Atp6v0e
Caprin1	Ak3	Aldoa	Armcx4	Atp6ap2	Arl2bp	Atp6v1b2
Capza2	Ak4	Aldoc	Armt1	Atp6v0a2	Arl4c	Atp6v1e1
Capzb	Ak6	Alg10b	Arntl	Atp6v0b	Arl5a	Atp6v1g1
Card11	Akap1	Alg11	Arpc1a	Atp6v0d1	Arl5b	Atp7a
Cars2	Akap10	Alg13	Arpc1b	Atp6v0e	Arl6ip1	Atp8b2
Casc3	Akap11	Alg14	Arpc2	Atp6v1b2	Arl6ip5	Atrnl1
Casd1	Akap13	Alg5	Arpc3	Atp6v1f	Arl6ip6	Atrx
Casp2	Akap8	Alg6	Arpc4	Atp7a	Arl8a	Atxn1
Casp8ap2	Akap8l	Alkbh1	Arpc5	Atp8a1	Arl8b	Atxn10
Cbfb	Akap9	Alkbh5	Arpc5l	Atp8a2	Armc1	Atxn2
Cbl	Akirin1	Alkbh8	Arpp19	Atp8b2	Armc8	Atxn2l
Cblb	Akirin2	Alms1	Arrdc3	Atp9b	Armt1	Atxn7l3
Cbx1	Akna	Alpk2	Arrdc4	Atrx	Arnt	Atxn7l3b
Cbx3	Akr1a1	Als2	Arsb	Atxn1	Arpc1a	Aup1
Cbx4	Akr1b10	Als2cl	Art2b	Atxn10	Arpc1b	Avl9
Cbx5	Akr1c13	Alyref	Asap1	Atxn2l	Arpc2	Axin1
Ccar1	Akr1e1	Ambra1	Asb3	Atxn3	Arpc3	Axl
Ccdc117	Akt1	Amd1	Asb6	Atxn7	Arpc4	Azin1
Ccdc127	Akt2	Amd2	Asf1a	Atxn7l1	Arpc5	B230219D22Rik
Ccdc25	Akt3	Amer1	Asf1b	Atxn7l3	Arpc5l	B2m
Ccdc34	Alad	Amfr	Ash1l	Atxn7l3b	Arpp19	B3gat3
Ccdc93	Alcam	Ammecr1	Aspm	Aup1	Arrdc3	B4galt1
Ccl4	Aldh18a1	Amn1	Asxl1	Aven	Asah1	B4galt4
Ccm2	Aldh7a1	Anapc1	Asxl2	Avl9	Asap1	B4galt5
Ccna2	Aldh9a1	Anapc11	Atad1	Axin1	Asb3	BC005537
Ccnb1	Aldoa	Anapc13	Atad2	Axin2	Asb7	BC107364
Ccnb2	Aldoc	Anapc16	Atad2b	Azi2	Asf1a	Bach1
Ccnc	Alg10b	Anapc2	Atad5	Azin1	Asf1b	Bag1
Ccnd2	Alg11	Anapc4	Atf1	B230219D22Rik	Ash1l	Basp1
Ccnd3	Alg13	Angel2	Atf2	B2m	Asns	Baz1b
Ccndbp1	Alg14	Angptl4	Atf7ip	B3galnt2	Aspm	Baz2b
Ccne2	Alg5	Ank	Atg16l1	B3galt4	Astn1	Bbx
Ccnf	Alg6	Ank3	Atg3	B4galt1	Asxl1	Bcar3
Ccng2	Alkbh1	Ankfy1	Atl3	B4galt5	Asxl2	Bcas2
Ccni	Alkbh5	Ankhd1	Atp10a	BC005537	Atad1	Bcat1
Ccnk	Alkbh8	Ankib1	Atp11b	Babam2	Atad2	Bcl2l11
Ccnl2	Alms1	Ankle1	Atp11c	Bach2	Atad2b	Bcl9l
Ccnq	Als2	Ankle2	Atp13a3	Bag1	Atad5	Bcorl1
Ccnt1	Als2cl	Ankmy2	Atp1a1	Bag6	Atf1	Bdp1
Ccnt2	Alyref	Ankra2	Atp1b3	Batf	Atf2	Bgn
Ccr2	Ambra1	Ankrd10	Atp2a2	Baz1b	Atf4	Bhlhe40
Ccr5	Amd1	Ankrd11	Atp2a3	Baz2b	Atf5	Bicc1
Ccr7	Amd2	Ankrd12	Atp2b1	Bbc3	Atf6	Bicd2
Cct2	Amdhd2	Ankrd13a	Atp2c1	Bbof1	Atf6b	Bicra
Cct5	Amfr	Ankrd13c	Atp5a1	Bcas2	Atf7ip	Birc6
Cd164	Ammecr1	Ankrd16	Atp5b	Bcl11b	Atg12	Bivm
Cd2	Ammecr1l	Ankrd17	Atp5c1	Bcl2	Atg16l1	Blm
Cd226	Amn1	Ankrd26	Atp5e	Bcl2l11	Atg3	Bloc1s6
Cd247	Ampd2	Ankrd27	Atp5g1	Bcl9	Atl2	Blvra
Cd27	Anapc1	Ankrd28	Atp5g3	Bcl9l	Atl3	Bmi1
Cd28	Anapc10	Ankrd37	Atp5j	Bclaf1	Atm	Bmp4
Cd2ap	Anapc11	Ankrd40	Atp5l	Bcor	Atmin	Bmper
Cd3d	Anapc13	Ankrd44	Atp5md	Bcorl1	Atp11b	Bmpr1a
Cd3e	Anapc16	Ankrd46	Atp5mpl	Bdp1	Atp13a3	Bmpr2
Cd3g	Anapc2	Ankrd50	Atp5o	Bfar	Atp1a1	Bms1
Cd4	Anapc4	Ankrd52	Atp5pb	Bhlhe40	Atp1b3	Bmt2
Cd47	Anapc5	Anks1	Atp6ap1	Bicd2	Atp2a2	Bnc1
Cd48	Angel1	Anln	Atp6ap2	Bicra	Atp2a3	Bnc2
Cd53	Angel2	Ano6	Atp6v0a2	Birc6	Atp2b1	Bnip2
Cd84	Angptl4	Anp32a	Atp6v0b	Blm	Atp2c1	Bnip3l
Cdan1	Ank3	Anp32b	Atp6v0d1	Bloc1s6	Atp5a1	Bora
Cdc25a	Ankfy1	Anp32e	Atp6v0e	Blvra	Atp5b	Bptf
Cdc25b	Ankhd1	Antxr2	Atp6v1b2	Bmi1	Atp5c1	Brd1
Cdc27	Ankib1	Anxa2	Atp6v1f	Bmpr1a	Atp5e	Brd2
Cdc37l1	Ankle1	Anxa5	Atp6v1g1	Bmpr2	Atp5g1	Brd3
Cdc40	Ankle2	Anxa6	Atp6v1h	Bms1	Atp5g2	Brd4
Cdc42	Ankmy2	Anxa7	Atp7a	Bmt2	Atp5g3	Brd8
Cdc42se1	Ankra2	Aopep	Atp8a1	Bnip2	Atp5h	Brip1
Cdc42se2	Ankrd10	Aox2	Atp8b2	Bnip3	Atp5j	Brix1
Cdc7	Ankrd11	Ap1ar	Atp9b	Bnip3l	Atp5md	Brms1l
Cdc73	Ankrd12	Ap1b1	Atr	Bptf	Atp5mpl	Brpf1
Cdca3	Ankrd13a	Ap1g1	Atrx	Braf	Atp5pb	Brwd1
Cdca4	Ankrd13b	Ap1m1	Atxn1	Brat1	Atp6ap1	Bsg
Cdipt	Ankrd13c	Ap1s1	Atxn10	Brd1	Atp6ap2	Btaf1
Cdk12	Ankrd16	Ap1s3	Atxn2l	Brd2	Atp6v0a2	Btbd7
Cdk13	Ankrd17	Ap2a2	Atxn3	Brd4	Atp6v0b	Btg1
Cdk17	Ankrd26	Ap2b1	Atxn7	Brd8	Atp6v0c	Btg3
Cdk19	Ankrd27	Ap3b1	Atxn7l1	Brip1	Atp6v0d1	Bud31
Cdk6	Ankrd28	Ap3d1	Atxn7l3	Brpf1	Atp6v0e	Bves
Cdkn1a	Ankrd37	Ap3m1	Atxn7l3b	Brwd1	Atp6v1a	Bzw1
Cdkn1b	Ankrd40	Ap3s1	Auh	Brwd3	Atp6v1b2	C1d
Cdkn2d	Ankrd44	Ap3s2	Aup1	Bsdc1	Atp6v1c1	C1galt1c1
Cdon	Ankrd46	Ap4e1	Aurkb	Btaf1	Atp6v1d	C1qbp
Cds2	Ankrd50	Ap4s1	Aven	Btbd7	Atp6v1e1	C1s1
Cebpg	Ankrd52	Ap5m1	Avl9	Btf3	Atp6v1f	C2cd2l
Celf1	Ankrd54	Apaf1	Axin1	Btg1	Atp6v1g1	C2cd5
Celf2	Anks1	Apbb1ip	Axin2	Btg2	Atp6v1h	Cab39
Cemip2	Anks1b	Apc	Azi2	Btla	Atp8a1	Cab39l
Cenpa	Anks3	Apex2	Azin1	Bub3	Atp8b2	Cables1
Cenpe	Anln	Api5	B230219D22Rik	Bud31	Atp9b	Cacna1a
Cenpx	Ano6	Aplf	B2m	Bzw1	Atpaf2	Cacul1
Cep192	Anp32a	Aplp2	B3galt4	C1d	Atrx	Cadm1
Cep350	Anp32b	Apobec3	B4galnt1	C1galt1	Atxn1	Cald1
Cep97	Anp32e	Apopt1	B4galt1	C2cd2l	Atxn1l	Calhm2
Cers2	Antxr2	App	B4galt5	C2cd5	Atxn2l	Calm1
Cflar	Anxa2	Appbp2	BC005537	C330007P06Rik	Atxn7l1	Calm2
Cggbp1	Anxa5	Appl1	Babam2	Cab39	Atxn7l3	Calm3
Cgrrf1	Anxa6	Appl2	Bach1	Cab39l	Atxn7l3b	Calr
Chaf1a	Anxa7	Aptx	Bach2	Cacna1a	Aup1	Calu
Chd1	Aoc2	Aqp3	Bag1	Cacna1e	Aurkb	Camk1d
Chd1l	Aopep	Aqp9	Bag5	Cadm1	Avl9	Camk2d
Chd3	Ap1ar	Aqr	Bard1	Calcrl	Axin1	Camkk2
Chd4	Ap1b1	Ar	Batf	Calhm2	Azi2	Camkmt
Chd7	Ap1g1	Araf	Bax	Calm1	Azin1	Camsap1
Chek1	Ap1s1	Arap1	Baz1a	Calm2	B230219D22Rik	Camsap2
Chmp2b	Ap1s2	Arap2	Baz1b	Calm3	B2m	Canx
Chsy1	Ap1s3	Arcn1	Baz2a	Calr	B3gnt5	Capn2
Chtop	Ap2a2	Arel1	Baz2b	Camk1d	B4galt1	Caprin1
Cic	Ap2b1	Arf1	Bbc3	Camk2d	B4galt5	Capza1
Cinp	Ap2s1	Arf3	Bbx	Camk4	B4galt7	Capza2
Cish	Ap3b1	Arf4	Bcap31	Camkk2	BC005537	Capzb
Ckap2l	Ap3d1	Arf5	Bcas2	Canx	BC035044	Card19
Ckap5	Ap3m1	Arf6	Bccip	Cap1	BC055324	Carnmt1
Clcn3	Ap3s1	Arfgap2	Bcl10	Capn1	Babam1	Cars
Clec2d	Ap3s2	Arfgap3	Bcl11b	Capn2	Bach1	Casc4
Clec2i	Ap4e1	Arfgef1	Bcl2	Caprin1	Bach2	Casd1
Clint1	Ap4s1	Arfgef2	Bcl2l1	Capza1	Bag1	Casp2
Clk1	Ap5m1	Arfip1	Bcl2l11	Capza2	Bag4	Casp8
Clk2	Apaf1	Arfrp1	Bcl3	Capzb	Bag6	Casp8ap2
Clk4	Apbb1ip	Arglu1	Bcl9	Card11	Bahd1	Cav1
Clspn	Apc	Arhgap1	Bcl9l	Carnmt1	Bak1	Cavin1
Clta	Apex1	Arhgap10	Bclaf1	Cars2	Bank1	Cbfa2t2
Cltc	Apex2	Arhgap11a	Bcor	Casc3	Bap1	Cbfb
Cluh	Aph1a	Arhgap12	Bcorl1	Casd1	Bard1	Cblb
Cmah	Api5	Arhgap15	Bdp1	Casp6	Basp1	Cbx1
Cmip	Aplf	Arhgap18	Bfar	Casp7	Batf	Cbx3
Cmtm6	Aplp2	Arhgap19	Bhlhe40	Casp8	Bax	Cbx5
Cmtm7	Apobec3	Arhgap21	Bicd2	Casp8ap2	Baz1a	Ccar1
Cnbp	Apoh	Arhgap25	Bicdl1	Cast	Baz1b	Ccdc115
Cnn2	Apopt1	Arhgap26	Bicra	Cbfb	Baz2a	Ccdc117
Cnnm3	Appbp2	Arhgap27	Bicral	Cbl	Baz2b	Ccdc122
Cnot1	Appl1	Arhgap29	Bin2	Cblb	Bbc3	Ccdc124
Cnot2	Appl2	Arhgap30	Birc2	Cbx1	Bbx	Ccdc127
Cnot3	Aprt	Arhgap35	Birc3	Cbx3	Bcap31	Ccdc186
Cnot6	Aptx	Arhgap4	Birc6	Cbx4	Bcar3	Ccdc34
Cnot6l	Aqp3	Arhgap45	Bivm	Ccar1	Bcas2	Ccdc50
Cnot7	Aqp9	Arhgap5	Blm	Ccdc117	Bcat1	Ccdc6
Cnot9	Aqr	Arhgap9	Blmh	Ccdc124	Bccip	Ccdc80
Coa5	Araf	Arhgdia	Bloc1s6	Ccdc127	Bcl10	Ccl7
Cog2	Arap1	Arhgdib	Blvra	Ccdc171	Bcl11a	Ccn1
Cog3	Arap2	Arhgef1	Bmi1	Ccdc50	Bcl2	Ccn2
Col4a3bp	Arcn1	Arhgef11	Bmp2k	Ccdc71l	Bcl2a1d	Ccn4
Commd2	Arel1	Arhgef12	Bmpr1a	Ccdc93	Bcl2l1	Ccna2
Commd4	Arf1	Arhgef18	Bmpr2	Ccl4	Bcl2l11	Ccnb1
Copa	Arf3	Arhgef2	Bms1	Ccm2	Bcl3	Ccnb1ip1
Copb1	Arf4	Arhgef3	Bmt2	Ccna2	Bcl6	Ccnd2
Copb2	Arf5	Arhgef38	Bnip2	Ccnb1	Bcl7a	Ccne2
Cops8	Arf6	Arhgef6	Bnip3	Ccnb1ip1	Bcl9	Ccnf
Coq3	Arfgap1	Arhgef7	Bnip3l	Ccnb2	Bcl9l	Ccng2
Coro1a	Arfgap2	Arid1a	Bod1l	Ccnc	Bclaf1	Ccni
Coro1c	Arfgap3	Arid1b	Bora	Ccnd2	Bcor	Ccnk
Cox11	Arfgef1	Arid2	Bptf	Ccnd3	Bdp1	Ccnl2
Cox5a	Arfgef2	Arid3a	Braf	Ccndbp1	Becn1	Ccnq
Cox7b	Arfgef3	Arid4a	Brap	Ccne2	Bfar	Ccnt1
Cpne3	Arfip1	Arid4b	Brat1	Ccnf	Bhlha15	Ccnt2
Cpsf2	Arfrp1	Arid5a	Brd1	Ccng2	Bhlhe40	Ccny
Cpsf6	Arglu1	Arid5b	Brd2	Ccni	Bhlhe41	Ccser1
Cpsf7	Arhgap1	Arih1	Brd3	Ccnk	Bicd2	Cct6a
Creb1	Arhgap10	Arih2	Brd4	Ccnl2	Bicdl1	Cct8
Crebbp	Arhgap11a	Arl13b	Brd7	Ccnq	Bicra	Cd164
Crebrf	Arhgap12	Arl14ep	Brd8	Ccnt1	Bicral	Cd24a
Crebzf	Arhgap15	Arl15	Brip1	Ccnt2	Bin1	Cd2ap
Crim1	Arhgap18	Arl2bp	Brix1	Ccny	Bin2	Cd44
Crip1	Arhgap19	Arl4c	Brpf1	Ccr2	Birc2	Cd47
Crlf3	Arhgap21	Arl5a	Brwd1	Ccr4	Birc3	Cd81
Cs	Arhgap25	Arl5b	Brwd3	Ccr7	Birc5	Cd9
Cse1l	Arhgap26	Arl6ip1	Bsg	Ccser2	Birc6	Cdc27
Csk	Arhgap27	Arl6ip5	Bsph1	Cct2	Blcap	Cdc37l1
Csnk1a1	Arhgap30	Arl6ip6	Btaf1	Cct5	Blm	Cdc40
Csnk1d	Arhgap33	Arl8a	Btbd1	Cct6a	Blmh	Cdc42
Csnk1g1	Arhgap35	Arl8b	Btbd2	Cd164	Blnk	Cdc42bpa
Csnk2a1	Arhgap4	Armc1	Btbd7	Cd2	Bloc1s6	Cdc42bpb
Cstf3	Arhgap45	Armc10	Btf3	Cd226	Bmf	Cdc7
Ctbp1	Arhgap5	Armc7	Btg1	Cd247	Bmi1	Cdc73
Ctcf	Arhgap9	Armc8	Btg2	Cd274	Bmp2k	Cdca3
Ctdsp2	Arhgdia	Armcx1	Btla	Cd28	Bmpr1a	Cdca4
Ctdspl2	Arhgdib	Armcx4	Bub1b	Cd2ap	Bms1	Cdh11
Ctla4	Arhgef1	Armh3	Bub3	Cd3d	Bmt2	Cdh2
Ctnnb1	Arhgef11	Armt1	Bud31	Cd3e	Bnip2	Cdh3
Ctps	Arhgef12	Arnt	Bzw1	Cd3g	Bnip3	Cdk1
Ctps2	Arhgef18	Arntl	C1d	Cd4	Bnip3l	Cdk11b
Ctr9	Arhgef2	Arpc1a	C1galt1	Cd40lg	Bod1l	Cdk12
Ctsc	Arhgef3	Arpc1b	C1galt1c1	Cd44	Borcs7	Cdk14
Cul2	Arhgef38	Arpc2	C2cd2l	Cd47	Bptf	Cdk16
Cul5	Arhgef6	Arpc3	C2cd3	Cd48	Braf	Cdk17
Cux1	Arhgef7	Arpc4	C330007P06Rik	Cd52	Brca1	Cdk19
Cxcr4	Arid1a	Arpc5	Caap1	Cd53	Brd1	Cdk2
Cyb561a3	Arid1b	Arpc5l	Cab39	Cd55	Brd2	Cdk6
Cyb5a	Arid2	Arpp19	Cab39l	Cd84	Brd4	Cdk8
Cyb5b	Arid3a	Arrb1	Cables2	Cdan1	Brd8	Cdkn1b
Cybc1	Arid3b	Arrb2	Cacna1a	Cdc25b	Bri3	Cdkn2a
Cyc1	Arid4a	Arrdc1	Cacybp	Cdc27	Brix1	Cdkn2c
Cyfip2	Arid4b	Arrdc3	Cadm1	Cdc40	Brk1	Cdon
Cyld	Arid5a	Arrdc4	Calcrl	Cdc42	Brox	Cds2
Cyth1	Arid5b	Arsb	Calhm2	Cdc42se1	Brpf1	Cdv3
Cytip	Arih1	Art2b	Calm1	Cdc42se2	Brwd3	Cebpb
D030056L22Rik	Arih2	Asah1	Calm2	Cdc7	Bsdc1	Cebpg
D10Wsu102e	Arl1	Asap1	Calm3	Cdc73	Bsg	Celf1
D16Ertd472e	Arl13b	Asap2	Calr	Cdca3	Btaf1	Celf2
D5Ertd579e	Arl14ep	Asb1	Calu	Cdca4	Btbd7	Cemip
Daam1	Arl15	Asb13	Camk1d	Cdip1	Btbd9	Cemip2
Dars	Arl2bp	Asb3	Camk2d	Cdipt	Btf3	Cenpa
Dbi	Arl4a	Asb6	Camk4	Cdk11b	Btg1	Cenpc1
Dbr1	Arl4c	Asb7	Camkk2	Cdk12	Btg2	Cenpe
Dcaf12	Arl4d	Ascc1	Camta2	Cdk13	Btg3	Cenpn
Dck	Arl5a	Ascc3	Cant1	Cdk17	Btk	Cenpt
Dclre1b	Arl5b	Asf1a	Canx	Cdk19	Btla	Cenpw
Dcp1a	Arl6ip1	Asf1b	Cap1	Cdk6	Bub1b	Cep120
Dcp2	Arl6ip5	Ash1l	Capn1	Cdk8	Bub3	Cep135
Dcun1d1	Arl6ip6	Aspm	Capn2	Cdkn1b	Bud31	Cep295
Dcun1d3	Arl8a	Asrgl1	Capns1	Cdon	Bzw1	Cep85
Dcun1d5	Arl8b	Ass1	Caprin1	Cds2	Bzw2	Cers2
Ddb1	Arl9	Asxl1	Capza1	Cdyl2	C130026I21Rik	Cfl1
Ddit4	Armc1	Asxl2	Capza2	Cebpg	C1d	Cfl2
Ddr1	Armc10	Atad1	Capzb	Celf1	C1galt1	Cflar
Ddx23	Armc7	Atad2	Card11	Celf2	C1qbp	Cggbp1
Ddx27	Armc8	Atad2b	Cars2	Cemip2	C2cd2l	Cgrrf1
Ddx39b	Armcx1	Atad5	Casc3	Cenpa	C2cd3	Chac1
Ddx3x	Armcx4	Atf1	Casd1	Cenpc1	C2cd5	Chaf1a
Ddx41	Armh3	Atf2	Casp2	Cenpj	C330007P06Rik	Chchd3
Ddx5	Armt1	Atf4	Casp3	Cenpt	C9orf72	Chd1
Ddx52	Arnt	Atf6	Casp6	Cep120	Cab39	Chd1l
Ddx6	Arntl	Atf7ip	Casp8	Cep128	Cab39l	Chd2
Degs1	Arpc1a	Atg10	Casp8ap2	Cep192	Cacna1a	Chd3
Dek	Arpc1b	Atg12	Cast	Cep295	Cacna1e	Chd4
Dennd1b	Arpc2	Atg13	Cbfb	Cep350	Cacul1	Chd9
Dennd4a	Arpc3	Atg14	Cbl	Cep83	Cacybp	Cherp
Dennd4b	Arpc4	Atg16l1	Cblb	Cep97	Cad	Chfr
Dennd5a	Arpc5	Atg16l2	Cbx1	Cept1	Cadm1	Chl1
Depdc1b	Arpc5l	Atg2a	Cbx3	Cers2	Calcoco1	Chmp4b
Desi2	Arpp19	Atg2b	Cbx4	Ces1g	Calcrl	Chmp5
Dgat1	Arrb1	Atg3	Cbx5	Cfl1	Calhm2	Chp1
Dgka	Arrb2	Atg4c	Ccar1	Cfl2	Calm1	Chst14
Dgkd	Arrdc1	Atg5	Ccdc115	Cflar	Calm2	Chsy1
Dhcr7	Arrdc3	Atg9a	Ccdc117	Cggbp1	Calm3	Chtop
Dhx15	Arrdc4	Atic	Ccdc12	Cgrrf1	Calr	Cilk1
Dhx8	Arsb	Atl2	Ccdc122	Chchd3	Calu	Cip2a
Dhx9	Arsk	Atl3	Ccdc124	Chd1	Camk1d	Cisd2
Dido1	Art2b	Atmin	Ccdc127	Chd2	Camk2d	Cited2
Dip2b	Asah1	Atp10a	Ccdc25	Chd3	Camkk2	Ckap2l
Dipk2a	Asap1	Atp11a	Ccdc34	Chd4	Camta2	Ckap4
Dkc1	Asap2	Atp11b	Ccdc50	Chd7	Cand1	Ckap5
Dld	Asb1	Atp11c	Ccdc6	Chd8	Cant1	Cks2
Dlg1	Asb13	Atp13a3	Ccdc71l	Chd9	Canx	Clcn3
Dmxl1	Asb3	Atp1a1	Ccdc82	Cherp	Cap1	Clcn5
Dnaja2	Asb6	Atp1b1	Ccdc88c	Chfr	Capn1	Clic4
Dnajb1	Asb7	Atp1b3	Ccdc93	Chl1	Capns1	Clk1
Dnajb9	Ascc3	Atp2a2	Ccl4	Chmp4b	Caprin1	Clk2
Dnajc10	Asf1a	Atp2a3	Ccm2	Chordc1	Capza1	Clk4
Dnajc3	Asf1b	Atp2b1	Ccna2	Chtop	Capza2	Clspn
Dnajc30	Ash1l	Atp2b4	Ccnb1	Cic	Capzb	Clstn1
Dnajc9	Asna1	Atp2c1	Ccnb1ip1	Cipc	Card11	Cltc
Dnmt1	Asns	Atp5a1	Ccnb2	Cish	Carmil1	Cmss1
Dock10	Asph	Atp5b	Ccnc	Ckap2l	Carnmt1	Cmtm4
Dock11	Aspm	Atp5c1	Ccnd2	Ckap5	Cars2	Cnbp
Dock2	Aste1	Atp5d	Ccnd3	Cks2	Casc3	Cnep1r1
Dock8	Asxl1	Atp5e	Ccndbp1	Clasp2	Casd1	Cnih1
Dph3	Asxl2	Atp5g1	Ccne2	Clcn3	Casp2	Cnn3
Dpy19l1	Atad1	Atp5g3	Ccnf	Clec2d	Casp3	Cnnm3
Dpy19l4	Atad2	Atp5h	Ccng1	Clec2i	Casp4	Cnot1
Dpysl2	Atad2b	Atp5j	Ccng2	Clint1	Casp6	Cnot10
Drap1	Atad3a	Atp5md	Ccni	Clip1	Casp8	Cnot2
Drc1	Atad5	Atp5mpl	Ccnj	Clk1	Casp8ap2	Cnot3
Dse	Atf1	Atp5pb	Ccnk	Clk2	Casp9	Cnot4
Dtx3l	Atf2	Atp6ap1	Ccnl1	Clk4	Cast	Cnot6
Dusp2	Atf4	Atp6ap2	Ccnl2	Cln3	Cbfa2t2	Cnot6l
Dusp5	Atf6	Atp6v0a2	Ccnq	Clpx	Cbfa2t3	Cnot7
Dusp6	Atf6b	Atp6v0b	Ccnt1	Clta	Cbfb	Cnot8
Dvl2	Atf7ip	Atp6v0d1	Ccnt2	Cltc	Cbl	Cnot9
Dyrk1a	Atg12	Atp6v0e	Ccny	Cluh	Cblb	Cntln
Dyrk2	Atg13	Atp6v1a	Ccr2	Cmah	Cbx1	Cobll1
E2f2	Atg16l1	Atp6v1b2	Ccr4	Cmip	Cbx3	Cog2
Ecpas	Atg16l2	Atp6v1c1	Ccr5	Cmss1	Cbx4	Cog3
Ect2	Atg2a	Atp6v1d	Ccr7	Cmtm6	Cbx5	Col12a1
Edc3	Atg2b	Atp6v1e1	Ccser2	Cnnm2	Ccar1	Col1a1
Edem1	Atg3	Atp6v1f	Cct2	Cnnm3	Ccar2	Col1a2
Edem3	Atg5	Atp6v1g1	Cct5	Cnot1	Ccdc115	Col3a1
Eef1a1	Atg9a	Atp6v1h	Cct6a	Cnot10	Ccdc117	Col4a1
Eef1b2	Atic	Atp7a	Cd164	Cnot11	Ccdc12	Col4a5
Eefsec	Atl2	Atp8a1	Cd2	Cnot2	Ccdc124	Col4a6
Efcab14	Atl3	Atp8a2	Cd226	Cnot3	Ccdc127	Col5a1
Efna4	Atm	Atp8b2	Cd247	Cnot4	Ccdc186	Col5a2
Efr3a	Atmin	Atp8b4	Cd24a	Cnot6	Ccdc25	Col6a2
Egr1	Atp10a	Atp9b	Cd27	Cnot6l	Ccdc32	Col8a1
Ehmt1	Atp11b	Atpaf2	Cd274	Cnot7	Ccdc50	Commd4
Eif2a	Atp11c	Atpif1	Cd28	Cnot8	Ccdc6	Cop1
Eif2ak3	Atp13a1	Atr	Cd2ap	Cnp	Ccdc71l	Copa
Eif2s3y	Atp13a2	Atrn	Cd37	Cntn5	Ccdc82	Copb2
Eif3a	Atp13a3	Atrnl1	Cd3d	Coa5	Ccdc88c	Cops2
Eif3b	Atp1a1	Atrx	Cd3e	Cog2	Ccdc93	Cops4
Eif3e	Atp1b3	Atxn1	Cd3g	Cog3	Ccl2	Cops5
Eif4a1	Atp2a2	Atxn10	Cd4	Cog5	Ccl22	Cops8
Eif4a2	Atp2a3	Atxn1l	Cd40lg	Col4a3bp	Ccl4	Coq3
Eif4b	Atp2b1	Atxn2	Cd44	Commd4	Ccn1	Coro1c
Eif4e2	Atp2b4	Atxn2l	Cd47	Copa	Ccna2	Cox11
Eif4ebp2	Atp2c1	Atxn3	Cd48	Copb1	Ccnb1	Cox7b
Eif4h	Atp5a1	Atxn7	Cd5	Copb2	Ccnb1ip1	Cpd
Eif5	Atp5b	Atxn7l1	Cd52	Cope	Ccnb2	Cpe
Eif5a2	Atp5c1	Atxn7l3	Cd53	Cops2	Ccnd2	Cpne3
Eif5b	Atp5d	Atxn7l3b	Cd80	Cops4	Ccne2	Cpox
Elavl1	Atp5e	Auh	Cd81	Cops8	Ccnf	Cpsf2
Elf1	Atp5g1	Aup1	Cd82	Coq10b	Ccng2	Cpsf6
Elf2	Atp5g2	Aurka	Cd84	Coq3	Ccni	Cpsf7
Elf4	Atp5g3	Aurkb	Cdan1	Coro1a	Ccnk	Cramp1l
Elk4	Atp5h	Aven	Cdc123	Coro1c	Ccnl1	Crb2
Elmsan1	Atp5j	Avl9	Cdc14a	Coro7	Ccnl2	Creb1
Elovl5	Atp5k	Axin1	Cdc20	Cotl1	Ccnt1	Creb3l1
Emb	Atp5md	Axin2	Cdc25a	Cox11	Ccnt2	Creb3l2
Emd	Atp5mpl	Azi2	Cdc25b	Cox5a	Ccny	Crebbp
Emg1	Atp5pb	Azin1	Cdc27	Cox7a2l	Ccr4	Crebl2
Emp3	Atp6ap1	B230219D22Rik	Cdc37l1	Cox7b	Ccr5	Crebzf
Emsy	Atp6ap2	B230307C23Rik	Cdc40	Cox7c	Ccr6	Crim1
Enc1	Atp6v0a2	B2m	Cdc42	Cpne3	Ccr7	Cs
Entpd5	Atp6v0b	B3galnt2	Cdc42bpa	Cpox	Ccser2	Csde1
Entpd7	Atp6v0d1	B3galt4	Cdc42se1	Cpsf2	Cct2	Cse1l
Epc1	Atp6v0e	B3galt6	Cdc42se2	Cpsf6	Cct4	Csf1
Eps15	Atp6v1a	B3gat3	Cdc6	Cpsf7	Cct5	Csnk1a1
Epsti1	Atp6v1b2	B3glct	Cdc7	Cramp1l	Cct6a	Csnk1d
Erap1	Atp6v1c1	B3gnt2	Cdc73	Crbn	Cct8	Csnk1e
Erg28	Atp6v1d	B430306N03Rik	Cdca3	Creb1	Cd164	Csnk1g3
Eri1	Atp6v1e1	B4galnt4	Cdca4	Crebbp	Cd180	Csnk2a1
Ermp1	Atp6v1f	B4galt1	Cdipt	Crebl2	Cd19	Csrnp2
Errfi1	Atp6v1g1	B4galt4	Cdk1	Crebrf	Cd2	Csrp1
Esco1	Atp6v1h	B4galt5	Cdk11b	Crebzf	Cd22	Cstf3
Esco2	Atp7a	BC003965	Cdk12	Crim1	Cd24a	Ctcf
Esf1	Atp8a1	BC005537	Cdk13	Crlf3	Cd274	Ctdnep1
Espl1	Atp8b2	BC029722	Cdk17	Crot	Cd2bp2	Ctdsp1
Esyt1	Atp8b4	BC031181	Cdk19	Crtc3	Cd300lf	Ctdsp2
Esyt2	Atp9b	BC048562	Cdk2	Cry1	Cd36	Ctdspl2
Etaa1	Atpaf2	BC052040	Cdk2ap2	Csde1	Cd37	Ctnnb1
Etf1	Atpif1	BC055324	Cdk4	Cse1l	Cd38	Ctnnbl1
Etnk1	Atr	Babam1	Cdk5	Csk	Cd3e	Ctnnd1
Ets1	Atrn	Babam2	Cdk6	Csmd1	Cd44	Ctps
Etv3	Atrnl1	Bach1	Cdk8	Csnk1a1	Cd47	Ctsl
Evl	Atrx	Bach2	Cdkal1	Csnk1d	Cd48	Cttn
Exo1	Atxn1	Bad	Cdkn1a	Csnk1g3	Cd52	Cttnbp2nl
Exoc4	Atxn10	Bag1	Cdkn1b	Csnk2a1	Cd53	Cuedc1
Exosc9	Atxn1l	Bag4	Cdkn2aipnl	Csrp1	Cd69	Cuedc2
F2r	Atxn2	Bag5	Cdkn2c	Cstf3	Cd74	Cul1
Fam102a	Atxn2l	Bag6	Cdkn2d	Ctcf	Cd79a	Cul2
Fam104a	Atxn3	Bahd1	Cdon	Ctdp1	Cd79b	Cul4a
Fam107b	Atxn7	Bap1	Cds2	Ctdsp2	Cd81	Cul5
Fam111a	Atxn7l1	Bard1	Cdv3	Ctdspl2	Cd82	Cul7
Fam118b	Atxn7l3	Batf	Cdyl2	Ctla4	Cd83	Cux1
Fam120a	Atxn7l3b	Bax	Cebpb	Ctnnb1	Cd84	Cwc27
Fam120b	Auh	Baz1a	Cebpg	Ctps	Cd86	Cxadr
Fam126a	Aunip	Baz1b	Cebpz	Ctps2	Cd8a	Cxcl1
Fam126b	Aup1	Baz2a	Celf1	Ctr9	Cd93	Cxcl10
Fam133b	Aurka	Baz2b	Celf2	Ctsb	Cdc123	Cxcl12
Fam160b1	Aurkb	Bbc3	Cemip2	Ctsc	Cdc14a	Cxcl5
Fam168b	Avl9	Bbip1	Cenpa	Cul2	Cdc25a	Cyb561a3
Fam169b	Axin1	Bbof1	Cenpc1	Cul5	Cdc25b	Cyb5b
Fam193a	Axin2	Bbs9	Cenpe	Cux1	Cdc27	Cyb5r3
Fam210a	Azi2	Bbx	Cenpf	Cwf19l2	Cdc34	Cyc1
Fam219a	Azin1	Bcap31	Cenpi	Cyb561a3	Cdc40	Cyp26b1
Fam222b	B230219D22Rik	Bcas2	Cenpj	Cyb5a	Cdc42	Cyp4f16
Fam49a	B230307C23Rik	Bcas3	Cenpq	Cyb5b	Cdc42se1	Cyp51
Fam49b	B2m	Bcat2	Cenpt	Cybc1	Cdc42se2	Cystm1
Fam76a	B3galnt2	Bccip	Cep128	Cyc1	Cdc45	Cyth3
Fam76b	B3galt4	Bckdk	Cep170	Cyld	Cdc7	D030056L22Rik
Fam78a	B3galt6	Bcl10	Cep192	Cyp4f16	Cdc73	D10Wsu102e
Fam8a1	B3gat3	Bcl11b	Cep295	Cyth1	Cdca3	D230025D16Rik
Fam91a1	B3glct	Bcl2	Cep350	Cyth2	Cdca4	D5Ertd579e
Farsa	B3gnt2	Bcl2l1	Cep55	Cyth3	Cdca7	D630045J12Rik
Fastkd2	B3gnt3	Bcl2l11	Cep83	Cytip	Cdh17	Daam1
Fastkd3	B4galnt1	Bcl2l13	Cep97	D030056L22Rik	Cdipt	Dab2
Fbxl3	B4galnt4	Bcl3	Cept1	D10Wsu102e	Cdk1	Dab2ip
Fbxl5	B4galt1	Bcl6	Cers2	D16Ertd472e	Cdk12	Dag1
Fbxo11	B4galt4	Bcl9	Cers5	D2hgdh	Cdk13	Daglb
Fbxo3	B4galt5	Bcl9l	Cers6	D5Ertd579e	Cdk17	Dapk1
Fbxo33	B4galt7	Bclaf1	Ces1g	Daam1	Cdk19	Dazap1
Fbxo45	BC003965	Bcor	Cfl1	Dapp1	Cdk2	Dbi
Fbxw11	BC005537	Bcorl1	Cfl2	Dars	Cdk2ap1	Dbn1
Fbxw2	BC029722	Bdp1	Cflar	Dazap1	Cdk4	Dcaf1
Fbxw7	BC031181	Becn1	Cggbp1	Dbr1	Cdk5r1	Dcaf12
Fchsd2	BC055324	Bfar	Cgrrf1	Dcaf1	Cdk6	Dcaf8
Fem1c	Babam1	Bhlhe40	Chac2	Dcaf12	Cdk7	Dcbld2
Fgf13	Babam2	Bicd2	Chaf1a	Dcaf13	Cdk8	Dck
Fgfr1op	Bach1	Bicdl1	Champ1	Dcaf17	Cdkal1	Dclre1a
Fgfr1op2	Bach2	Bicra	Chchd3	Dchs2	Cdkn1a	Dcp2
Fhl3	Bad	Bicral	Chd1	Dck	Cdkn1b	Dcun1d1
Fis1	Bag1	Bin1	Chd2	Dcp2	Cdkn2a	Dcun1d3
Fkbp1a	Bag2	Bin2	Chd3	Dcun1d1	Cdkn2aipnl	Dcun1d4
Fkbp5	Bag4	Birc2	Chd4	Dcun1d3	Cdkn2c	Dcun1d5
Flcn	Bag5	Birc3	Chd7	Dcun1d5	Cdkn2d	Ddb1
Fli1	Bag6	Birc5	Chd8	Ddb1	Cdon	Ddit4
Flna	Bahd1	Birc6	Chd9	Ddb2	Cds2	Ddit4l
Fmc1	Bak1	Bivm	Chek2	Ddit4	Cdv3	Ddost
Fmr1	Banf1	Blm	Cherp	Ddr1	Cdyl2	Ddr1
Fnip1	Bap1	Blmh	Chfr	Ddx17	Ceacam1	Ddr2
Fos	Bard1	Bloc1s4	Chic2	Ddx23	Cebpb	Ddx17
Foxj2	Batf	Bloc1s6	Chl1	Ddx27	Cebpg	Ddx21
Foxo1	Batf3	Blvra	Chm	Ddx39b	Cebpz	Ddx23
Foxp1	Bax	Bmi1	Chmp3	Ddx3x	Cecr2	Ddx27
Frat1	Baz1a	Bmp2k	Chmp4b	Ddx3y	Celf1	Ddx39b
Frat2	Baz1b	Bmp5	Chmp5	Ddx41	Celf2	Ddx3x
Frmd6	Baz2a	Bmpr1a	Chordc1	Ddx46	Cemip2	Ddx46
Frmd8	Baz2b	Bmpr2	Chp1	Ddx5	Cenpa	Ddx5
Fry	Bbc3	Bms1	Chsy1	Ddx52	Cenpc1	Ddx52
Fryl	Bbip1	Bmt2	Chtop	Ddx58	Cenpf	Ddx55
Ftl1	Bbof1	Bnip2	Chuk	Ddx6	Cenpi	Ddx6
Fubp1	Bbs5	Bnip3	Ciao2a	Deaf1	Cenpn	Deaf1
Fundc1	Bbx	Bnip3l	Cic	Decr1	Cenpq	Degs1
Furin	Bcap29	Bod1l	Cinp	Degs1	Cenpt	Dek
Fut11	Bcap31	Bora	Cip2a	Dek	Cenpx	Denn2b
Fxn	Bcas2	Borcs7	Cipc	Dennd1b	Cep120	Dennd1a
Fxr1	Bcas3	Bphl	Cisd2	Dennd4b	Cep135	Dennd3
Fyb	Bcat1	Bptf	Cish	Dennd5a	Cep170b	Dennd5a
Fyn	Bcat2	Braf	Cited2	Derl2	Cep192	Derl2
G2e3	Bccip	Brap	Ckap2l	Dgat1	Cep295	Desi2
G3bp1	Bckdk	Brat1	Ckap5	Dgka	Cep350	Dgcr8
G3bp2	Bcl10	Brca1	Cks2	Dgkd	Cep55	Dgkd
Gabarap	Bcl11b	Brca2	Clasp2	Dhcr7	Cep57	Dhcr7
Gabarapl1	Bcl2	Brcc3	Clcn3	Dhx15	Cep68	Dhrs3
Gabpa	Bcl2l1	Brd1	Clec2d	Dhx30	Cep76	Dhx15
Gabpb2	Bcl2l11	Brd2	Clec2i	Dhx35	Cep83	Dhx35
Gak	Bcl2l13	Brd3	Clic1	Dhx36	Cep85l	Dhx36
Galnt10	Bcl3	Brd4	Clic4	Dhx38	Cept1	Diaph3
Galnt11	Bcl7a	Brd7	Clint1	Dhx8	Cerk	Dip2b
Galnt7	Bcl9	Brd8	Clk1	Dhx9	Cers2	Dip2c
Gapvd1	Bcl9l	Brf1	Clk2	Diaph3	Cers5	Dipk1b
Gars	Bclaf1	Bri3	Clk4	Dip2b	Cers6	Dipk2a
Gart	Bclaf3	Bri3bp	Cln3	Dip2c	Cetn2	Dis3
Gata3	Bcor	Brinp3	Cln6	Dipk2a	Cfdp1	Dkc1
Gatad2b	Bcorl1	Brip1	Clpx	Dkc1	Cfi	Dlc1
Gbp2	Bcr	Brix1	Clspn	Dlg1	Cfl1	Dld
Gbp3	Bdh1	Brk1	Clta	Dlg4	Cfl2	Dlg1
Gclm	Bdp1	Brms1l	Cltc	Dmxl1	Cflar	Dlg4
Gem	Becn1	Brox	Cluh	Dnah8	Cggbp1	Dlgap4
Gemin5	Bend3	Brpf1	Cmah	Dnaja1	Cgrrf1	Dlx2
Gga3	Bend4	Brwd1	Cmip	Dnaja2	Chac1	Dmxl1
Ghitm	Best3	Brwd3	Cmpk1	Dnajb1	Chaf1a	Dnajb1
Gid4	Bex3	Bsdc1	Cmss1	Dnajb9	Champ1	Dnajb14
Gid8	Bfar	Bsg	Cmtm6	Dnajc10	Chchd3	Dnajc10
Gigyf2	Bhlhe40	Bsph1	Cmtm7	Dnajc13	Chd1	Dnajc3
Gimap3	Bicd1	Btaf1	Cnbp	Dnajc16	Chd1l	Dnajc5
Gimap4	Bicd2	Btbd1	Cnep1r1	Dnajc24	Chd2	Dnajc7
Gimap6	Bicdl1	Btbd10	Cnih1	Dnajc3	Chd4	Dnajc9
Gimap9	Bicra	Btbd2	Cnn2	Dnajc30	Chd7	Dnmt1
Git2	Bicral	Btbd7	Cnnm3	Dnajc5	Chd8	Dnmt3a
Glb1	Bid	Btbd8	Cnot1	Dnajc7	Chfr	Dock5
Glipr2	Bin2	Btbd9	Cnot11	Dnajc9	Chic2	Dock7
Gls	Birc2	Btf3	Cnot2	Dnttip1	Chl1	Dph3
Glyr1	Birc3	Btg1	Cnot3	Dock10	Chmp2b	Dph6
Gm4070	Birc5	Btg2	Cnot4	Dock11	Chmp3	Dpy19l1
Gm42715	Birc6	Btla	Cnot6	Dock2	Chmp4b	Dpy19l4
Gm527	Bivm	Bub1	Cnot6l	Dock8	Chmp5	Dpysl2
Gmeb2	Blcap	Bub1b	Cnot7	Dph3	Chordc1	Drap1
Gmfb	Blm	Bub3	Cnot8	Dph6	Chp1	Drosha
Gna13	Blmh	Bud13	Cnot9	Dpp4	Chpf2	Dse
Gnai3	Bloc1s4	Bud23	Cnp	Dpy19l1	Chst11	Dst
Gnb1	Bloc1s6	Bud31	Cntn5	Dpy19l4	Chst3	Dstn
Gne	Blvra	Bzw1	Coa5	Dpysl2	Chsy1	Dstyk
Gnpat	Bmerb1	Bzw2	Cog2	Dr1	Chtop	Dtx3
Golph3	Bmi1	C1d	Cog3	Drap1	Chuk	Dusp1
Gopc	Bmp2k	C1galt1	Cog5	Drc1	Ciao2a	Dusp11
Gosr1	Bmp5	C1galt1c1	Col4a3bp	Dse	Cic	Dusp5
Gpatch8	Bmpr1a	C1qbp	Commd2	Dtwd2	Ciita	Dusp6
Gpbp1l1	Bmpr2	C2cd2l	Commd3	Dtx3l	Cip2a	Dusp7
Gpd1l	Bms1	C2cd3	Commd4	Dusp10	Cipc	Dut
Gpkow	Bmt2	C2cd5	Commd6	Dusp11	Cirbp	Dvl2
Gpr146	Bnip2	C330007P06Rik	Cop1	Dusp2	Cisd1	Dvl3
Gpr174	Bnip3	Caap1	Copa	Dusp5	Cisd2	Dync1i2
Gpr183	Bnip3l	Cab39	Copb1	Dusp6	Cish	Dynll1
Gramd3	Bod1l	Cab39l	Copb2	Dusp7	Cit	Dynll2
Grap2	Bola2	Cabin1	Copg2	Dvl2	Cited2	Dynlrb1
Grk6	Bola3	Cables1	Cops2	Dvl3	Ckap4	Dyrk1a
Grm8	Bora	Cables2	Cops5	Dym	Ckap5	Dysf
Gsk3a	Borcs7	Cacna1a	Cops8	Dyrk1a	Cks1b	Dzip1l
Gsk3b	Bphl	Cacna1e	Copz1	Dyrk2	Cks2	Dzip3
Gspt1	Bpnt1	Cacnb2	Coq10b	E130309D02Rik	Clasp1	E2f7
Gtf2h1	Bptf	Cacul1	Coq3	E2f2	Clasp2	Ece1
Gtf2h4	Braf	Cacybp	Corin	Eapp	Clcn3	Ecpas
Gtf2i	Brap	Cadm1	Coro1a	Ecpas	Clcn4	Ect2
Gtpbp1	Brat1	Cadm2	Coro1c	Ect2	Cldnd1	Edem1
Gtpbp4	Brca1	Calcoco1	Coro7	Edem1	Clec2d	Edem3
Gtpbp8	Brca2	Calcrl	Cotl1	Edem3	Clec2i	Edn1
Gtse1	Brcc3	Calhm2	Cox11	Eea1	Clic1	Eea1
Gvin1	Brd1	Calm1	Cox5a	Eed	Clic4	Eef1a1
Gzmb	Brd2	Calm2	Cox6a1	Eef1a1	Clint1	Eef1b2
H1f3	Brd3	Calm3	Cox6b1	Eef1b2	Clip1	Eef2
H1f5	Brd4	Calr	Cox7a2	Eef2	Clk1	Efcab14
H2-D1	Brd7	Calu	Cox7a2l	Eefsec	Clk2	Efemp1
H2-K1	Brd8	Camk1d	Cox7b	Efcab14	Clk3	Efl1
H2-Q7	Brd9	Camk2d	Cox7c	Efcab6	Clk4	Efna3
H2ac4	Brf1	Camk2g	Cox8a	Efr3a	Cln3	Efna4
H2ac8	Brf2	Camk4	Cpd	Egr1	Clns1a	Efna5
H2ax	Bri3bp	Camkk2	Cpeb4	Ehmt1	Clptm1	Efnb2
H2bc18	Brip1	Camkmt	Cplane1	Eif1b	Clptm1l	Efr3a
H2bc3	Brix1	Camsap1	Cpne3	Eif2a	Clpx	Egfr
H3c1	Brk1	Camsap2	Cpsf2	Eif2ak1	Clspn	Egr1
H3c11	Brms1l	Camta1	Cpsf6	Eif2ak3	Clta	Ehmt1
H3c2	Brox	Camta2	Cpsf7	Eif2s3y	Cltc	Eif1
H3c3	Brpf1	Cand1	Cr1l	Eif3a	Cluh	Eif2a
H3c8	Brpf3	Cant1	Cramp1l	Eif3b	Cmah	Eif2ak3
H3f3b	Brwd1	Canx	Crbn	Eif3c	Cmpk1	Eif2ak4
H4c1	Brwd3	Cap1	Creb1	Eif3e	Cmss1	Eif2s2
H4c11	Bsdc1	Capg	Crebbp	Eif3f	Cmtm6	Eif3a
H4c14	Bsg	Capn1	Crebrf	Eif3h	Cmtm7	Eif3e
H4c2	Bsph1	Capn11	Crebzf	Eif3j1	Cnbp	Eif3h
H4c3	Bst2	Capn2	Crim1	Eif3m	Cnep1r1	Eif3j1
H4c6	Btaf1	Capn7	Crip1	Eif4a1	Cnn2	Eif4a1
H4c8	Btbd1	Capns1	Crk	Eif4a2	Cnn3	Eif4a2
H4f16	Btbd10	Caprin1	Crkl	Eif4b	Cnnm3	Eif4b
Hars2	Btbd2	Capza1	Crlf3	Eif4e2	Cnot1	Eif4e2
Hat1	Btbd7	Capza2	Crtc3	Eif4ebp2	Cnot10	Eif4ebp1
Hdac1	Btbd9	Capzb	Cry1	Eif4enif1	Cnot11	Eif4ebp2
Hdac2	Btf3	Car5b	Crybg1	Eif4g1	Cnot2	Eif4enif1
Hdlbp	Btg1	Card11	Cs	Eif4g2	Cnot3	Eif4g1
Heatr1	Btg2	Card19	Csde1	Eif4g3	Cnot4	Eif4g2
Heatr5a	Btla	Card6	Cse1l	Eif4h	Cnot6	Eif4g3
Heca	Bub1	Carf	Csk	Eif5	Cnot6l	Eif4h
Hectd1	Bub1b	Carmil2	Csnk1a1	Eif5a	Cnot7	Eif5a
Hectd4	Bub3	Carnmt1	Csnk1d	Eif5a2	Cnot8	Eif5a2
Heg1	Bud13	Cars2	Csnk1g1	Elavl1	Cnot9	Eif5b
Hells	Bud23	Casc3	Csnk1g3	Elf1	Cnp	Elavl1
Helz	Bud31	Casd1	Csnk2a1	Elf2	Cnst	Elf1
Hemgn	Bysl	Casp2	Csrp1	Elf4	Cntn5	Elf2
Herc1	Bzw1	Casp3	Cstf3	Elk4	Cntrob	Elk4
Herc2	Bzw2	Casp6	Ctbp1	Elmo1	Coa5	Elmsan1
Herc3	C1d	Casp7	Ctcf	Elmsan1	Cog2	Eloa
Herpud1	C1galt1	Casp8	Ctdnep1	Elovl5	Cog3	Elovl5
Hexb	C1galt1c1	Casp8ap2	Ctdp1	Elovl6	Cog5	Elovl6
Hif1a	C1qbp	Cast	Ctdsp1	Emb	Cog7	Elp3
Hilpda	C2cd2l	Cat	Ctdsp2	Emd	Commd3	Emc7
Hinfp	C2cd3	Cbfa2t2	Ctdspl2	Emg1	Commd4	Emd
Hint1	C2cd5	Cbfb	Ctla4	Eml3	Copa	Eme1
Hipk1	C330007P06Rik	Cbl	Ctnnb1	Emsy	Copb1	Eml3
Hipk2	C330018D20Rik	Cblb	Ctps	Enc1	Copb2	Emp1
Hipk3	Caap1	Cbll1	Ctps2	Eno1	Cops4	Emsy
Hist1h4m	Cab39	Cbwd1	Ctr9	Entpd5	Cops8	Emx2
Hivep2	Cab39l	Cbx1	Ctsb	Ep300	Cops9	Enc1
Hjurp	Cabin1	Cbx3	Ctsc	Ep400	Copz1	Enpp4
Hmgb1	Cables1	Cbx4	Ctse	Epc1	Coq10b	Entpd7
Hmgcr	Cables2	Cbx5	Cuedc2	Epc2	Coq2	Ep300
Hmgn1	Cacna1a	Cbx7	Cul1	Epn1	Coq8a	Ep400
Hmgxb3	Cacna1e	Cc2d1b	Cul2	Eps15	Coro1a	Epb41l2
Hmgxb4	Cacul1	Ccar1	Cul3	Eps15l1	Coro1c	Epb41l3
Hnrnpa0	Cacybp	Ccar2	Cul4a	Epsti1	Coro2a	Epb41l4a
Hnrnpa1	Cad	Ccdc115	Cul5	Erap1	Cotl1	Epc1
Hnrnpa2b1	Cadm1	Ccdc117	Cux1	Erbin	Cox11	Epc2
Hnrnpab	Cadm2	Ccdc12	Cwc15	Erg28	Cox17	Epha1
Hnrnpd	Calcrl	Ccdc124	Cwf19l1	Eri1	Cox5a	Epha4
Hnrnpdl	Calhm2	Ccdc126	Cx3cr1	Ermp1	Cox6a1	Ephb2
Hnrnpf	Calm1	Ccdc127	Cxcr4	Esco1	Cox6b1	Ephb3
Hnrnpk	Calm2	Ccdc171	Cyb561a3	Esf1	Cox6c	Ephb4
Hnrnpul1	Calm3	Ccdc174	Cyb5a	Esrra	Cox7a2	Epn1
Hook3	Calr	Ccdc178	Cyb5b	Esyt1	Cox7a2l	Eprs
Hopx	Calu	Ccdc186	Cyb5r3	Esyt2	Cox7b	Eps15
Hprt	Camk1d	Ccdc22	Cybc1	Etaa1	Cox7c	Eps15l1
Hrh2	Camk2d	Ccdc25	Cyc1	Etf1	Cox8a	Eps8
Hs2st1	Camk2g	Ccdc32	Cyfip2	Etnk1	Cpeb1	Erbin
Hsbp1	Camk4	Ccdc34	Cyld	Ets1	Cpeb2	Erc1
Hsd11b1	Camkk2	Ccdc47	Cyp11a1	Etv3	Cpeb3	Erg28
Hsp90aa1	Camkmt	Ccdc50	Cyp4f16	Etv6	Cpeb4	Ergic1
Hsp90ab1	Caml	Ccdc58	Cysltr1	Evl	Cpne3	Ergic2
Hsp90b1	Camsap1	Ccdc59	Cyth1	Ewsr1	Cpox	Eri1
Hspa14	Camsap2	Ccdc6	Cyth3	Exoc1	Cpsf1	Eri3
Hspa4	Camta1	Ccdc71l	Cytip	Exoc4	Cpsf2	Erlin2
Hspa5	Cand1	Ccdc77	D030056L22Rik	Exoc6	Cpsf4	Ermp1
Hspa8	Cand2	Ccdc82	D10Wsu102e	Exoc6b	Cpsf6	Esco2
Huwe1	Cant1	Ccdc88a	D16Ertd472e	Ext1	Cpsf7	Esf1
Hyal2	Canx	Ccdc88c	D5Ertd579e	Ezh2	Cr1l	Espl1
Hyou1	Cap1	Ccdc92	D630039A03Rik	Faah	Cramp1l	Esyt1
Hypk	Capn1	Ccdc93	D630045J12Rik	Fam102a	Crbn	Esyt2
Iars2	Capn2	Ccl25	Daam1	Fam104a	Crcp	Etaa1
Ice1	Capn7	Ccl4	Dach2	Fam107b	Creb1	Etf1
Icos	Capns1	Ccm2	Dad1	Fam111a	Creb3l2	Etnk1
Id1	Caprin1	Ccn3	Dap	Fam114a2	Crebbp	Eva1c
Id2	Capza1	Ccna2	Dapp1	Fam118b	Crebrf	Evi5
Id3	Capza2	Ccnb1	Dars	Fam120a	Crebzf	Ewsr1
Idh3a	Capzb	Ccnb1ip1	Dazap1	Fam120b	Creg1	Exo1
Ier3	Car12	Ccnb2	Dazap2	Fam120c	Creld2	Exoc4
Ier5	Card11	Ccnc	Dbf4	Fam126a	Crim1	Exoc5
Ifi209	Card19	Ccnd2	Dbi	Fam126b	Crkl	Exoc6b
Ifitm1	Carm1	Ccnd3	Dbnl	Fam129a	Crlf3	Ext1
Ifnar1	Carmil2	Ccndbp1	Dbr1	Fam133b	Crtc2	Eya4
Ifngr1	Carnmt1	Ccne2	Dcaf1	Fam160a2	Crtc3	Ezh2
Igf1r	Cars	Ccnf	Dcaf10	Fam160b1	Cry2	Ezr
Igf2r	Cars2	Ccng1	Dcaf12	Fam168a	Crybg3	F2r
Igfbp4	Casc3	Ccng2	Dcaf15	Fam168b	Cs	F3
Igip	Casc4	Ccnh	Dcaf17	Fam169b	Csde1	Fabp5
Iigp1	Casd1	Ccni	Dcaf7	Fam172a	Cse1l	Fads2
Ikzf1	Casp2	Ccnj	Dchs2	Fam193a	Csk	Fam104a
Ikzf3	Casp3	Ccnk	Dck	Fam210a	Csnk1a1	Fam107b
Il17ra	Casp6	Ccnl1	Dcp1a	Fam214a	Csnk1d	Fam120a
Il18r1	Casp7	Ccnl2	Dcp2	Fam219a	Csnk1e	Fam126a
Il2	Casp8	Ccnq	Dctn6	Fam45a	Csnk1g2	Fam126b
Il21r	Casp8ap2	Ccnt1	Dcun1d1	Fam49a	Csnk1g3	Fam129b
Il2rb	Cast	Ccnt2	Dcun1d3	Fam49b	Csnk2a1	Fam133b
Il4ra	Cat	Ccny	Dcun1d5	Fam53a	Csnk2a2	Fam13b
Il6ra	Cbfa2t2	Ccp110	Ddb1	Fam57b	Csnk2b	Fam13c
Il7r	Cbfb	Ccr2	Ddb2	Fam76a	Csrp1	Fam160a2
Ilf2	Cbl	Ccr4	Ddi2	Fam76b	Cstb	Fam160b1
Immt	Cblb	Ccr5	Ddit4	Fam78a	Cstf2	Fam168a
Impa1	Cbll1	Ccr7	Ddost	Fam8a1	Cstf2t	Fam168b
Impa2	Cbwd1	Ccsap	Ddr1	Fam91a1	Cstf3	Fam172a
Impad1	Cbx1	Ccser2	Ddx10	Farsa	Ctbp1	Fam193a
Incenp	Cbx3	Cct2	Ddx17	Fas	Ctcf	Fam219a
Inf2	Cbx4	Cct4	Ddx19a	Fastkd2	Ctdnep1	Fam222b
Ing4	Cbx5	Cct5	Ddx21	Fastkd3	Ctdp1	Fam3c
Ino80d	Cbx7	Cct6a	Ddx23	Fau	Ctdsp1	Fam43a
Inpp1	Cbx8	Cct8	Ddx27	Fbrs	Ctdsp2	Fam53a
Inpp4b	Cc2d1b	Ccz1	Ddx39b	Fbxl3	Ctdspl2	Fam57b
Inpp5d	Ccar1	Cd101	Ddx3x	Fbxl5	Ctla4	Fam76a
Insig2	Ccar2	Cd164	Ddx3y	Fbxo11	Ctnnb1	Fam76b
Insr	Ccdc102a	Cd2	Ddx41	Fbxo25	Ctps	Fam8a1
Ints11	Ccdc115	Cd200	Ddx46	Fbxo33	Ctps2	Fam91a1
Ints2	Ccdc117	Cd200r1	Ddx5	Fbxo38	Ctsb	Far1
Ints3	Ccdc12	Cd226	Ddx52	Fbxo45	Ctsc	Farp1
Invs	Ccdc122	Cd247	Ddx55	Fbxw11	Ctse	Farp2
Ipcef1	Ccdc124	Cd27	Ddx58	Fbxw7	Ctsh	Farsa
Ipo11	Ccdc127	Cd274	Ddx6	Fchsd2	Ctso	Fastk
Ipo7	Ccdc137	Cd28	Deaf1	Fem1c	Ctss	Fat1
Ipo9	Ccdc171	Cd2ap	Decr2	Fermt3	Ctsz	Fat4
Iqgap1	Ccdc178	Cd37	Degs1	Fgf13	Cuedc2	Fau
Iqgap2	Ccdc186	Cd3d	Dek	Fgfr1op	Cul1	Fbln2
Irak4	Ccdc25	Cd3e	Dennd1b	Fgfr1op2	Cul2	Fbln5
Ireb2	Ccdc32	Cd3g	Dennd1c	Fhl3	Cul3	Fbn1
Irf1	Ccdc34	Cd4	Dennd2d	Fip1l1	Cul4a	Fbxl14
Irf2bpl	Ccdc47	Cd40lg	Dennd4b	Fis1	Cul5	Fbxl3
Irf4	Ccdc50	Cd44	Dennd5a	Fkbp15	Cux1	Fbxl5
Irgm1	Ccdc58	Cd47	Depdc1b	Fkbp1a	Cwc15	Fbxo11
Irgm2	Ccdc59	Cd48	Derl1	Flcn	Cwc25	Fbxo3
Ist1	Ccdc6	Cd5	Derl2	Fli1	Cwc27	Fbxo33
Itch	Ccdc71	Cd52	Desi2	Flna	Cwf19l1	Fbxo45
Itfg1	Ccdc71l	Cd53	Dgat1	Flvcr1	Cxcl1	Fbxw11
Itga4	Ccdc77	Cd55	Dgcr8	Fmc1	Cxcl10	Fbxw7
Itga6	Ccdc82	Cd6	Dgka	Fmnl1	Cxcr4	Fcho2
Itgal	Ccdc88a	Cd69	Dgkd	Fmnl3	Cxcr5	Fchsd2
Itgav	Ccdc88b	Cd80	Dglucy	Fmr1	Cxxc1	Fem1c
Itgb2	Ccdc88c	Cd81	Dhcr24	Fnbp1	Cxxc5	Fer
Itgb3	Ccdc92	Cd82	Dhdds	Fnbp4	Cyb561a3	Fgfr1op
Itk	Ccdc93	Cd84	Dhx15	Fnip1	Cyb5a	Fgfr2
Itm2b	Ccdc97	Cd9	Dhx29	Fnta	Cyb5b	Fhdc1
Itprid2	Ccl4	Cd96	Dhx30	Focad	Cyb5r4	Fhl1
Ivns1abp	Ccm2	Cd99l2	Dhx35	Fopnl	Cyba	Fhl3
Jade1	Ccn3	Cdan1	Dhx36	Fos	Cybb	Fip1l1
Jade2	Ccna2	Cdc123	Dhx40	Foxj2	Cyc1	Fkbp14
Jagn1	Ccnb1	Cdc14a	Dhx8	Foxn3	Cyfip1	Fkbp1a
Jak1	Ccnb1ip1	Cdc14b	Dhx9	Foxo1	Cyfip2	Fkbp3
Jak2	Ccnb2	Cdc20	Diaph1	Foxo3	Cyld	Fkbp7
Jmjd4	Ccnc	Cdc23	Diaph2	Foxp1	Cyp51	Flna
Jmy	Ccnd2	Cdc25a	Diaph3	Fpgt	Cystm1	Flnb
Jpt2	Ccnd3	Cdc25b	Dido1	Frat1	Cyth1	Flrt3
Jun	Ccndbp1	Cdc27	Dip2b	Frat2	Cyth3	Flvcr1
Kansl1	Ccne1	Cdc37l1	Dip2c	Frmd6	Cytip	Fmc1
Kat5	Ccne2	Cdc40	Dipk1b	Frmd8	D10Wsu102e	Fmn1
Kat6a	Ccnf	Cdc42	Dipk2a	Frrs1	D130040H23Rik	Fmnl3
Kat7	Ccng1	Cdc42bpa	Dis3	Fry	D1Ertd622e	Fmr1
Katnbl1	Ccng2	Cdc42ep3	Dis3l2	Fryl	D230025D16Rik	Fn1
Kbtbd11	Ccnh	Cdc42se1	Dkc1	Ftl1	D5Ertd579e	Fn3krp
Kbtbd2	Ccni	Cdc42se2	Dld	Fubp1	Daam1	Fnbp4
Kcnab2	Ccnj	Cdc45	Dlg1	Fundc1	Dad1	Fndc3a
Kcnn4	Ccnk	Cdc5l	Dlg4	Furin	Dapk1	Fndc3b
Kctd20	Ccnl1	Cdc6	Dlgap5	Fus	Dapp1	Fnip1
Kctd6	Ccnl2	Cdc7	Dmxl1	Fut11	Dars	Fnta
Kdelr1	Ccnq	Cdc73	Dnah8	Fxn	Daxx	Fopnl
Kdm1b	Ccnt1	Cdca2	Dnaja1	Fxr1	Dazap1	Fos
Kdm5a	Ccnt2	Cdca3	Dnaja2	Fxyd5	Dazap2	Fosl2
Kdm7a	Ccny	Cdca4	Dnajb1	Fyb	Dbf4	Foxj2
Khdrbs1	Ccp110	Cdca5	Dnajb12	Fyn	Dbi	Foxn3
Kidins220	Ccr2	Cdca7	Dnajb13	Fyttd1	Dbnl	Foxp1
Kif11	Ccr4	Cdca7l	Dnajb6	G2e3	Dbr1	Fras1
Kif15	Ccr5	Cdh12	Dnajb9	G3bp1	Dcaf1	Frg1
Kif1b	Ccr7	Cdip1	Dnajc10	G3bp2	Dcaf12	Frk
Kif21b	Ccrl2	Cdipt	Dnajc13	Gabarap	Dcaf13	Frmd4a
Kif22	Ccsap	Cdk1	Dnajc15	Gabarapl2	Dcaf6	Frmd6
Kin	Ccser2	Cdk11b	Dnajc16	Gabpa	Dcaf7	Frrs1
Klf13	Cct2	Cdk12	Dnajc2	Gabpb2	Dcaf8	Frs2
Klf2	Cct3	Cdk13	Dnajc3	Gak	Dcbld1	Fryl
Klf3	Cct4	Cdk16	Dnajc30	Galk2	Dck	Fscn1
Klf6	Cct5	Cdk17	Dnajc5	Galnt10	Dclk2	Fst
Klf9	Cct6a	Cdk19	Dnajc7	Galnt11	Dcp2	Fstl1
Klhdc2	Cct7	Cdk2	Dnajc8	Galnt6	Dcps	Fth1
Klhl12	Cct8	Cdk20	Dnajc9	Galnt7	Dctn3	Ftl1
Klhl20	Ccz1	Cdk2ap2	Dnase2a	Gapdh	Dctn4	Fto
Klhl24	Cd160	Cdk4	Dnmt1	Gapvd1	Dctn6	Fubp1
Klhl28	Cd164	Cdk5	Dnmt3a	Gars	Dcun1d1	Fubp3
Klhl5	Cd2	Cdk5rap2	Dnttip1	Gart	Dcun1d5	Fundc1
Klhl6	Cd200	Cdk6	Dock10	Gata3	Ddah1	Furin
Klhl9	Cd226	Cdk7	Dock11	Gatad2a	Ddb1	Fus
Kmt2a	Cd244a	Cdk8	Dock2	Gatad2b	Ddb2	Fut11
Kmt2c	Cd247	Cdkal1	Dock5	Gbf1	Ddi2	Fxn
Kmt2d	Cd27	Cdkl5	Dock8	Gbp2	Ddit3	Fxr1
Kmt2e	Cd274	Cdkn1a	Dok2	Gbp3	Ddit4	Fyttd1
Kmt5b	Cd28	Cdkn1b	Dop1a	Gbp7	Ddost	Fzd2
Kpna3	Cd2ap	Cdkn2aip	Dph3	Gbp8	Ddx1	Fzd4
Kpna4	Cd2bp2	Cdkn2aipnl	Dpp4	Gclc	Ddx10	Fzd5
Kpnb1	Cd37	Cdkn2c	Dpp8	Gclm	Ddx17	Fzd7
Krit1	Cd3d	Cdkn2d	Dpy19l1	Gdap2	Ddx19b	Fzd8
Krr1	Cd3e	Cdon	Dpy19l3	Gdi2	Ddx21	G2e3
L3mbtl2	Cd3g	Cds2	Dpy19l4	Gem	Ddx27	G3bp1
Lamp1	Cd44	Cdv3	Dpysl2	Gemin5	Ddx39	G3bp2
Lamtor3	Cd47	Cdyl	Dr1	Gga3	Ddx39b	Gab1
Laptm4a	Cd48	Cdyl2	Dram2	Ggnbp2	Ddx3x	Gab2
Laptm5	Cd52	Cebpb	Drap1	Ghitm	Ddx3y	Gabarap
Larp4b	Cd53	Cebpg	Dse	Gid4	Ddx41	Gabarapl1
Lasp1	Cd55	Cebpz	Dtx3l	Gid8	Ddx42	Gabbr1
Lbr	Cd69	Celf1	Dusp10	Gigyf1	Ddx46	Gabpa
Lck	Cd80	Celf2	Dusp11	Gigyf2	Ddx5	Gabpb1
Lcp1	Cd81	Cemip2	Dusp2	Gimap3	Ddx50	Gabpb2
Lcp2	Cd82	Cenpa	Dusp5	Gimap4	Ddx52	Gak
Ldha	Cd84	Cenpc1	Dusp6	Gimap6	Ddx55	Galnt10
Lef1	Cd8a	Cenpe	Dusp7	Git2	Ddx58	Galnt11
Lemd3	Cd8b1	Cenpf	Dvl2	Glb1	Ddx6	Galnt18
Leprotl1	Cd9	Cenpi	Dvl3	Glg1	Deaf1	Ganab
Lfng	Cd96	Cenpj	Dync1i2	Glipr2	Degs1	Gapdh
Lgals1	Cd99l2	Cenpl	Dynll1	Gls	Dek	Gapvd1
Lig4	Cdan1	Cenpm	Dynll2	Glt8d1	Dennd1b	Gars
Lin54	Cdc123	Cenpn	Dynlrb1	Gltp	Dennd1c	Gart
Lipa	Cdc14a	Cenpp	Dyrk1a	Glul	Dennd4a	Gas1
Lman2	Cdc14b	Cenpq	Dyrk2	Gm10521	Dennd4b	Gas2l1
Lmnb1	Cdc20	Cenpt	Dysf	Gm10778	Dennd5a	Gas6
Lnpep	Cdc23	Cenpw	E130311K13Rik	Gm11213	Dennd5b	Gask1b
Lpar6	Cdc25a	Cenpx	E2f1	Gm12185	Depdc1b	Gata3
Lpcat3	Cdc25b	Cep120	E2f2	Gm13212	Depdc5	Gata6
Lpin1	Cdc26	Cep128	E2f3	Gm20696	Derl1	Gatad1
Lpin2	Cdc27	Cep135	E2f4	Gm28053	Derl2	Gatad2a
Lpxn	Cdc34	Cep152	E2f8	Gm2a	Derl3	Gatad2b
Lratd2	Cdc37	Cep164	Ecpas	Gm4070	Desi2	Gbf1
Lrba	Cdc37l1	Cep170	Ect2	Gm44511	Dgkd	Gca
Lrch1	Cdc40	Cep192	Edc3	Gm527	Dhcr24	Gclc
Lrch3	Cdc42	Cep250	Edem1	Gmeb2	Dhcr7	Gclm
Lrig2	Cdc42bpa	Cep295	Edem3	Gmfb	Dhdds	Gcnt1
Lrmp	Cdc42bpg	Cep350	Eea1	Gmfg	Dhx15	Gcnt2
Lrp12	Cdc42se1	Cep55	Eed	Gmip	Dhx30	Gdap2
Lrp6	Cdc42se2	Cep57	Eef1a1	Gmps	Dhx35	Gdi2
Lrrc8c	Cdc45	Cep63	Eef1b2	Gna15	Dhx36	Gemin5
Lrrfip1	Cdc5l	Cep68	Eef1d	Gnai3	Dhx38	Get4
Lsm14a	Cdc6	Cep76	Eef1g	Gnaq	Dhx8	Gfra3
Lsm14b	Cdc7	Cep83	Eef2	Gnas	Dhx9	Ggnbp2
Lsm2	Cdc73	Cep85l	Eefsec	Gnb1	Diaph1	Ghr
Lsm3	Cdca2	Cep89	Efcab14	Gne	Diaph2	Gid4
Lsp1	Cdca3	Cep97	Efcab6	Gng2	Diaph3	Gid8
Lss	Cdca4	Cept1	Efhd2	Gnl3	Dip2b	Gigyf1
Ltn1	Cdca5	Cers2	Efna5	Gnpat	Dipk2a	Gigyf2
Luc7l2	Cdca7	Cers4	Efr3a	Golga1	Dkc1	Gja1
Luc7l3	Cdca7l	Cers5	Eftud2	Golga4	Dld	Gjc1
Ly6a	Cdca8	Cers6	Egln1	Golgb1	Dlg1	Gkap1
Ly6c2	Cdip1	Ces1g	Egln3	Golph3	Dlst	Glg1
Ly6e	Cdipt	Cetn2	Egr1	Gopc	Dmap1	Gli2
Ly75	Cdk1	Cetn3	Egr3	Gosr1	Dmxl1	Gli3
Lysmd3	Cdk11b	Cfap20	Ehmt1	Gpatch8	Dnaja1	Glis3
Lysmd4	Cdk12	Cfap36	Ei24	Gpbp1l1	Dnaja2	Glra3
Lyst	Cdk13	Cfap54	Eif1	Gpd1l	Dnaja3	Gls
M6pr	Cdk17	Cfap97	Eif1a	Gpd2	Dnajb1	Glt8d1
Macf1	Cdk19	Cfdp1	Eif1ad	Gphn	Dnajb11	Gltp
Macroh2a1	Cdk2	Cfl1	Eif1b	Gpkow	Dnajb12	Glyr1
Maf1	Cdk20	Cfl2	Eif2a	Gpr107	Dnajb4	Gm10778
Mafk	Cdk2ap1	Cflar	Eif2ak1	Gpr132	Dnajb6	Gm21992
Magt1	Cdk2ap2	Cggbp1	Eif2ak3	Gpr174	Dnajb9	Gm42715
Malsu1	Cdk4	Cgrrf1	Eif2ak4	Gpr183	Dnajc10	Gm44511
Maml2	Cdk5	Chac2	Eif2b5	Gramd1b	Dnajc2	Gm527
Man1a	Cdk5rap1	Chaf1a	Eif2s3x	Gramd3	Dnajc24	Gmeb2
Man1a2	Cdk5rap2	Champ1	Eif2s3y	Grap2	Dnajc3	Gmfb
Man2b1	Cdk6	Chchd1	Eif3a	Gripap1	Dnajc30	Gmnn
Manea	Cdk7	Chchd3	Eif3b	Grk2	Dnajc5	Gmps
Map2k1	Cdk8	Chchd7	Eif3c	Grk6	Dnajc7	Gna12
Map3k1	Cdk9	Chd1	Eif3e	Grm8	Dnajc8	Gnai3
Map3k2	Cdkal1	Chd1l	Eif3f	Grpel1	Dnajc9	Gnaq
Map3k5	Cdkl5	Chd2	Eif3h	Gsk3a	Dnase1l3	Gnas
Map3k8	Cdkn1a	Chd3	Eif3j1	Gsk3b	Dnase2a	Gnb1
Map4k5	Cdkn1b	Chd4	Eif3k	Gspt1	Dnmt3a	Gng12
Map7	Cdkn2aip	Chd6	Eif3l	Gtf2h1	Dock10	Gnl3
Mapk1	Cdkn2aipnl	Chd7	Eif3m	Gtf2h2	Dock11	Gnpat
Mapk1ip1l	Cdkn2c	Chd8	Eif4a1	Gtf2h4	Dock2	Golga3
Mapk8	Cdkn2d	Chd9	Eif4a2	Gtf2i	Dock8	Golga4
Mapk9	Cdon	Chek1	Eif4a3	Gtpbp1	Dok3	Golgb1
Mapre1	Cds2	Chek2	Eif4b	Gtpbp4	Dop1a	Golim4
Marchf6	Cdv3	Cherp	Eif4e	Gtpbp8	Dph3	Golph3
Marf1	Cdyl	Chfr	Eif4e2	Gvin1	Dpp3	Gopc
Mark2	Cdyl2	Chic2	Eif4ebp2	Gzf1	Dpp4	Gorasp2
Mast4	Cebpb	Chid1	Eif4enif1	Gzmb	Dpp8	Gpatch8
Mat2a	Cebpg	Chl1	Eif4g1	H1f0	Dpy19l1	Gpbp1l1
Mat2b	Cebpz	Chm	Eif4g2	H1f2	Dpy19l4	Gpc3
Matr3	Celf1	Chmp2b	Eif4g3	H1f3	Dpysl2	Gpc4
Mau2	Celf2	Chmp3	Eif4h	H1f5	Dr1	Gpc6
Mavs	Cemip2	Chmp4b	Eif5	H2-D1	Drg1	Gphn
Max	Cenpa	Chmp5	Eif5a	H2-K1	Dtl	Gpkow
Mbip	Cenpc1	Chmp7	Eif5a2	H2-M3	Dtnb	Gpm6a
Mbnl1	Cenpe	Chordc1	Eif5b	H2-Q4	Dtx3	Gpr107
Mcl1	Cenpf	Chp1	Elavl1	H2-Q7	Dtx3l	Gpr39
Mcm4	Cenpi	Chpf2	Elf1	H2ac8	Dusp1	Gps1
Mcm5	Cenpj	Chst14	Elf2	H2az2	Dusp10	Gpsm1
Mdc1	Cenpl	Chsy1	Elf4	H2bc3	Dusp11	Gpx4
Mdfic	Cenpm	Chtop	Elk1	H2bc6	Dusp16	Gpx8
Mdh1	Cenpn	Chuk	Elk3	H2bc8	Dusp2	Gramd3
Mdm2	Cenpq	Ciao1	Elk4	H3c1	Dusp4	Gramd4
Mdm4	Cenpt	Cic	Elmo1	H3c3	Dusp5	Grb10
Med1	Cenpw	Cilk1	Elmo2	H3c7	Dusp6	Grik5
Med12	Cenpx	Cinp	Elmsan1	H3f3a	Dusp7	Gripap1
Med13	Cep120	Cip2a	Eloa	H3f3b	Dut	Grk2
Med13l	Cep128	Cipc	Elovl5	H4c3	Dvl2	Grk6
Med14	Cep135	Cisd1	Elp2	H4c4	Dvl3	Gsk3a
Med17	Cep162	Cisd2	Elp6	H4c8	Dync1i2	Gsk3b
Med23	Cep170	Cish	Emb	Hace1	Dync2h1	Gspt1
Mef2d	Cep170b	Cit	Emd	Hadhb	Dynll2	Gsr
Melk	Cep192	Cited2	Eme1	Hars2	Dynlt3	Gtf2a1
Mepce	Cep250	Ckap2	Emg1	Hcls1	Dyrk1a	Gtf2h1
Mettl17	Cep295	Ckap2l	Eml3	Hdac1	Dyrk2	Gtf2h4
Mettl23	Cep350	Ckap5	Eml4	Hdac2	Dzip3	Gtf2i
Mettl5	Cep41	Ckb	Emp3	Hdac5	E2f1	Gtpbp4
Mex3b	Cep55	Cks1b	Emsy	Hdac7	E2f2	Gtpbp8
Mfsd1	Cep57	Cks2	Enc1	Hdlbp	E2f3	Gulp1
Mfsd14a	Cep57l1	Clasp1	Eno1	Heatr1	E2f4	H1f0
Mgat1	Cep63	Clasp2	Eno1b	Heatr5a	E2f8	H1f1
Mgat4a	Cep68	Clcc1	Enox2	Heatr5b	Eaf1	H1f2
Mgat5	Cep72	Clcn3	Ensa	Heca	Eapp	H1f3
Mgst2	Cep76	Clcn4	Entpd5	Hectd1	Ebf1	H1f4
Mia2	Cep83	Clcn5	Entpd7	Hectd4	Ebi3	H1f5
Mia3	Cep85	Clcn7	Eny2	Heg1	Ecpas	H2-Q4
Midn	Cep85l	Cldnd1	Eogt	Helb	Ect2	H2ac8
Mier1	Cep89	Clec16a	Ep300	Hells	Edem1	H2az1
Mier3	Cep97	Clec2d	Ep400	Helz	Edem2	H2az2
Miga2	Cept1	Clec2i	Epb41	Helz2	Edem3	H2bc12
Mindy2	Cercam	Clic1	Epb41l2	Hemgn	Eea1	H2bc13
Mindy3	Cers2	Clic4	Epc1	Herc1	Eed	H2bc18
Minpp1	Cers4	Clic6	Epc2	Herc2	Eef1a1	H2bc3
Mios	Cers5	Clint1	Epg5	Herc3	Eef1b2	H2bc4
Mis18a	Cers6	Clip1	Epm2aip1	Herc6	Eef1d	H2bc6
Mki67	Ces1g	Clip2	Epn1	Herpud1	Eef1e1	H2bc8
Mkln1	Cetn2	Clk1	Eprs	Hexb	Eef1g	H3c1
Mlec	Cetn3	Clk2	Eps15	Hikeshi	Eef2	H3c10
Mllt10	Cfap54	Clk3	Eps15l1	Hilpda	Eefsec	H3c14
Mllt6	Cfap97	Clk4	Epsti1	Hinfp	Efcab14	H3c3
Mlycd	Cfdp1	Clmp	Erap1	Hipk1	Efcab6	H3c4
Mmd	Cfl1	Cln3	Erbin	Hipk3	Efhd2	H3c7
Mndal	Cfl2	Cln6	Erg28	Hist1h4n	Efr3a	H3c8
Mnt	Cflar	Clns1a	Ergic2	Hivep1	Egr1	H3f3b
Mob1a	Cggbp1	Clock	Eri1	Hivep2	Egr2	H4c11
Mob4	Cgrrf1	Clp1	Ermp1	Hjurp	Egr3	H4c14
Morc3	Chac1	Clpp	Ero1l	Hk1	Ehbp1l1	H4c3
Mosmo	Chac2	Clptm1l	Errfi1	Hltf	Ehd1	H4c4
Mphosph6	Chaf1a	Clpx	Esco1	Hmbox1	Ehmt1	H4c8
Mphosph8	Champ1	Clspn	Esco2	Hmgb1	Ei24	Hacd2
Mpp5	Chchd1	Clstn1	Esf1	Hmgcr	Eif1	Hace1
Mpp6	Chchd3	Clta	Espl1	Hmgxb3	Eif1a	Hadhb
Mppe1	Chchd4	Cltc	Esyt1	Hnrnpa0	Eif1ad	Hat1
Mrpl1	Chd1	Cluh	Esyt2	Hnrnpa1	Eif1b	Hcfc1
Mrpl34	Chd1l	Clybl	Etaa1	Hnrnpa2b1	Eif2a	Hdac1
Mrpl45	Chd2	Cmah	Etf1	Hnrnpa3	Eif2ak1	Hdac5
Mrpl51	Chd3	Cmas	Etnk1	Hnrnpab	Eif2ak3	Hdac7
Mrps14	Chd4	Cmc1	Ets1	Hnrnpc	Eif2ak4	Hdgf
Mrps23	Chd6	Cmc2	Etv3	Hnrnpd	Eif2b5	Hdlbp
Mrtfa	Chd7	Cmip	Etv5	Hnrnpdl	Eif2s2	Heatr1
Ms4a4b	Chd8	Cmpk1	Etv6	Hnrnpf	Eif2s3y	Hectd1
Ms4a6b	Chd9	Cmss1	Evl	Hnrnph1	Eif3a	Hectd4
Msantd2	Chek1	Cmtm4	Ewsr1	Hnrnpk	Eif3b	Heg1
Msantd4	Chek2	Cmtm6	Exoc1	Hnrnpl	Eif3c	Hells
Msh6	Cherp	Cmtm7	Exoc2	Hnrnpll	Eif3d	Helz
Msi2	Chfr	Cmtr2	Exoc4	Hnrnpm	Eif3e	Herc1
Msl2	Chic2	Cnbp	Exoc5	Hnrnpr	Eif3f	Herc2
Msl3	Chl1	Cnep1r1	Exoc6	Hnrnpu	Eif3h	Herpud1
Msmo1	Chm	Cnga1	Exoc6b	Hook3	Eif3j1	Hes1
Msn	Chmp2b	Cnih1	Exosc1	Hp1bp3	Eif3k	Hexb
Mta2	Chmp3	Cnih4	Eya3	Hprt	Eif3l	Higd1a
Mtarc2	Chmp4b	Cnksr3	Ezh2	Hs2st1	Eif3m	Hipk1
Mtdh	Chmp5	Cnn2	Ezr	Hs3st3b1	Eif4a1	Hipk3
Mtf2	Chmp6	Cnn3	F2r	Hs6st3	Eif4a2	Hist1h4n
Mtfmt	Chmp7	Cnnm2	Faah	Hsbp1	Eif4a3	Hjurp
Mthfd2	Chordc1	Cnnm3	Fabp5	Hsd11b1	Eif4b	Hltf
Mtmr12	Chp1	Cnnm4	Faf2	Hsp90aa1	Eif4e	Hmces
Mtmr14	Chpf2	Cnot1	Fam102a	Hsp90ab1	Eif4e2	Hmga2
Mtpn	Chrac1	Cnot10	Fam104a	Hsp90b1	Eif4ebp1	Hmgb1
Mtrr	Chst11	Cnot11	Fam107b	Hspa14	Eif4ebp2	Hmgb2
Mxi1	Chst12	Cnot2	Fam111a	Hspa4	Eif4enif1	Hmgb3
Myb	Chst14	Cnot3	Fam114a2	Hspa5	Eif4g1	Hmgcr
Mycn	Chst2	Cnot4	Fam117b	Hspa8	Eif4g2	Hmgcs1
Myh9	Chsy1	Cnot6	Fam118b	Hspa9	Eif4g3	Hmgn1
Myl6	Chtop	Cnot6l	Fam120a	Hspbp1	Eif4h	Hmgn2
Myo10	Chuk	Cnot7	Fam120b	Hspe1	Eif5	Hmgxb3
Myo9b	Ciao2a	Cnot8	Fam120c	Huwe1	Eif5a	Hmgxb4
Mzt1	Ciao2b	Cnot9	Fam126a	Hyal2	Eif5b	Hmox1
N4bp2	Cic	Cnp	Fam126b	Hyou1	Elavl1	Hnrnpa0
N4bp2l2	Cilk1	Cnst	Fam129a	Hypk	Elf1	Hnrnpa1
Naa30	Cinp	Cntln	Fam133b	Iars	Elf2	Hnrnpa2b1
Naa40	Cip2a	Cntn5	Fam160a2	Iars2	Elf4	Hnrnpa3
Naa50	Cipc	Cntnap5a	Fam160b1	Icam2	Elk3	Hnrnpab
Nabp1	Cisd1	Cntrl	Fam168a	Ice1	Elk4	Hnrnpc
Nadk	Cisd2	Coa3	Fam168b	Icos	Ell	Hnrnpd
Nampt	Cish	Coa5	Fam169b	Id1	Ell2	Hnrnpdl
Nap1l4	Cit	Cog2	Fam172a	Id2	Elmo1	Hnrnpf
Nbeal2	Cited2	Cog3	Fam174a	Id3	Elmsan1	Hnrnph1
Nbn	Ckap2	Cog5	Fam193a	Ide	Eloc	Hnrnpk
Ncapd2	Ckap2l	Cog6	Fam199x	Ier3	Elovl5	Hnrnpl
Ncapd3	Ckap5	Cog8	Fam20b	Ier5	Elp2	Hnrnpll
Ncapg	Cks1b	Col11a1	Fam210a	Ifi203	Elp3	Hnrnpm
Ncapg2	Cks2	Col4a3bp	Fam219a	Ifi206	Emc3	Hnrnpr
Ncbp3	Clasp1	Commd10	Fam222b	Ifi209	Emc6	Hnrnpu
Nck1	Clasp2	Commd2	Fam234b	Ifit2	Emc7	Hnrnpul1
Ncl	Clcc1	Commd3	Fam43a	Ifnar1	Emd	Hook3
Ncoa2	Clcn3	Commd4	Fam49a	Ifngr1	Emg1	Hoxa10
Ncoa3	Clcn4	Commd6	Fam49b	Ift80	Eml3	Hoxa9
Ncoa7	Clcn5	Commd7	Fam53a	Igf1r	Eml4	Hoxb3
Ncstn	Clcn6	Commd8	Fam53c	Igf2r	Emp1	Hoxd13
Ndfip1	Clcn7	Cop1	Fam76a	Igfbp4	Emp3	Hp1bp3
Ndst2	Cldn12	Copa	Fam76b	Igip	Emsy	Hprt
Ndufa4	Cldnd1	Copb1	Fam78a	Iigp1	Eno1	Hs2st1
Ndufa5	Clec16a	Copb2	Fam8a1	Ikzf1	Ensa	Hs6st2
Ndufa6	Clec2d	Cope	Fam91a1	Ikzf2	Entpd3	Hs6st3
Ndufb1-ps	Clec2g	Copg1	Far1	Ikzf3	Entpd5	Hsbp1
Ndufv1	Clec2i	Copg2	Farsa	Il10ra	Entpd7	Hsf2
Ndufv2	Clic1	Cops2	Fas	Il16	Eogt	Hsp90aa1
Nedd1	Clic4	Cops4	Fastk	Il17ra	Ep300	Hsp90ab1
Nedd9	Clint1	Cops5	Fastkd2	Il18r1	Ep400	Hsp90b1
Neil3	Clip1	Cops7b	Fastkd3	Il18rap	Epb41	Hspa13
Nek7	Clip2	Cops8	Fau	Il1r1	Epb41l2	Hspa14
Nek9	Clk1	Copz1	Fbln2	Il27ra	Epc1	Hspa4
Neurl1b	Clk2	Coq10b	Fbrs	Il2ra	Epc2	Hspa5
Neurl3	Clk3	Coq3	Fbxl14	Il2rb	Epn1	Hspa8
Nfat5	Clk4	Coro1a	Fbxl17	Il31ra	Eprs	Hspa9
Nfatc2	Cln3	Coro1c	Fbxl3	Il4ra	Eps15	Hspd1
Nfatc2ip	Cln5	Coro2a	Fbxl5	Il6ra	Eps15l1	Hspe1
Nfatc3	Cln6	Coro7	Fbxo11	Il7r	Eral1	Hspg2
Nfe2l1	Clns1a	Cotl1	Fbxo21	Ilf2	Erap1	Htra1
Nfkb1	Clock	Cox11	Fbxo3	Immp2l	Erbin	Huwe1
Nfkbid	Clp1	Cox5a	Fbxo32	Immt	Ercc3	Hyal2
Nfkbiz	Clpp	Cox6a1	Fbxo33	Impa1	Ercc6	Hyou1
Nfx1	Clptm1	Cox6b1	Fbxo38	Impad1	Erg28	Hypk
Nfxl1	Clptm1l	Cox6c	Fbxo4	Impdh1	Ergic1	Iars
Nfyb	Clpx	Cox7a2	Fbxo45	Impdh2	Ergic2	Iars2
Nfyc	Clspn	Cox7a2l	Fbxo5	Inf2	Ermp1	Ice1
Nin	Clstn1	Cox7b	Fbxo8	Ing1	Ero1l	Id1
Nip7	Clta	Cox7c	Fbxo9	Ing4	Ero1lb	Id2
Nipbl	Cltc	Cox8a	Fbxw11	Ino80	Erp29	Id3
Nktr	Cluh	Cpd	Fbxw2	Ino80d	Erp44	Id4
Nlk	Clybl	Cpeb1	Fbxw7	Inpp4b	Esco2	Ide
Nme7	Cmas	Cpeb4	Fchsd2	Inpp5b	Esf1	Idh3a
Noc4l	Cmc1	Cplane1	Fdx1	Inpp5d	Esyt1	Ids
Nop10	Cmc2	Cpm	Fem1c	Inpp5k	Esyt2	Ier3
Nop58	Cmip	Cpne3	Fermt3	Insig2	Etaa1	Ier5
Nop9	Cmpk1	Cpox	Fgf13	Insr	Etf1	Ier5l
Notch1	Cmss1	Cpsf2	Fgfr1op	Ints12	Etnk1	Ifi204
Notch2	Cmtm4	Cpsf6	Fgfr1op2	Ints2	Ets1	Ifngr2
Npat	Cmtm6	Cpsf7	Fgfr2	Ints3	Ets2	Ifrd1
Npc1	Cmtm7	Cpt1a	Fhl3	Ints6	Etv3	Igf1r
Npc2	Cmtr2	Cracr2a	Filip1l	Ints7	Etv5	Igf2bp2
Nr2c2	Cnbp	Cradd	Fip1l1	Ints8	Etv6	Igf2r
Nr3c1	Cndp2	Cramp1l	Fis1	Invs	Evl	Igfbp4
Nrarp	Cnep1r1	Crbn	Fkbp15	Ip6k1	Ewsr1	Ikbip
Nras	Cnih1	Crcp	Fkbp1a	Ip6k2	Exo1	Ikzf3
Nrde2	Cnih4	Creb1	Fkbp3	Ipcef1	Exoc1	Il1rap
Nrf1	Cnksr3	Creb3l2	Fkbp5	Ipo11	Exoc4	Il31ra
Nrip1	Cnn2	Crebbp	Flcn	Ipo7	Exoc5	Il6st
Nsd2	Cnn3	Crebl2	Fli1	Ipo9	Exoc6	Ilf2
Nsd3	Cnnm2	Crebrf	Flna	Iqgap1	Exosc3	Immt
Nsg2	Cnnm3	Crebzf	Flot2	Iqgap2	Exosc7	Impact
Nsrp1	Cnnm4	Crem	Fmc1	Irak3	Exosc8	Impad1
Nt5c	Cnot1	Crim1	Fmnl1	Ireb2	Ext1	Impdh2
Nt5dc1	Cnot10	Crip1	Fmnl3	Irf1	Eya1	Incenp
Nucks1	Cnot11	Crk	Fmr1	Irf2	Eya3	Inf2
Nudt21	Cnot2	Crkl	Fn3krp	Irf2bp2	Ezh2	Ing1
Nuf2	Cnot3	Crlf3	Fnbp1	Irf2bpl	Ezr	Inhba
Nufip2	Cnot4	Crmp1	Fnbp4	Irf4	Fads2	Ino80
Numa1	Cnot6	Crnkl1	Fndc3a	Irgm1	Faim	Ino80d
Nup107	Cnot6l	Crot	Fnip1	Irgm2	Fam104a	Inpp5b
Nup153	Cnot7	Crtc1	Fnta	Ist1	Fam107b	Inppl1
Nup160	Cnot8	Crtc3	Focad	Itch	Fam111a	Insig1
Nup210	Cnot9	Cry1	Fopnl	Itga4	Fam114a2	Insig2
Nup214	Cnp	Crybg1	Fos	Itga6	Fam117b	Insr
Nup50	Cnst	Crybg3	Foxj2	Itgal	Fam118b	Ints1
Nup85	Cntn5	Cryl1	Foxj3	Itgav	Fam120a	Ints2
Nus1	Cntrl	Cs	Foxk1	Itgb1	Fam122b	Ints3
Nusap1	Cntrob	Csde1	Foxn2	Itgb2	Fam126a	Ints6
Nxpe3	Coa3	Cse1l	Foxn3	Itgb3	Fam129a	Ints7
Ociad1	Coa5	Csgalnact2	Foxo1	Itk	Fam133b	Ints8
Oga	Coa6	Csk	Foxo3	Itm2b	Fam160b1	Ip6k2
Ogfr	Cobll1	Csmd3	Foxp1	Itpk1	Fam167a	Ipo11
Ogt	Cog2	Csnk1a1	Fpgt	Itpkb	Fam168b	Ipo7
Opa1	Cog3	Csnk1d	Frat1	Itpr1	Fam169b	Ipo9
Opa3	Cog4	Csnk1e	Frat2	Itpr2	Fam174a	Iqgap1
Orc1	Cog5	Csnk1g1	Frg1	Itprid2	Fam193a	Ireb2
Orc4	Cog6	Csnk1g2	Frmd6	Itsn2	Fam214a	Irf2
Orc5	Cog7	Csnk1g3	Frmd8	Ivns1abp	Fam219a	Irf2bp2
Ormdl2	Cog8	Csnk2a1	Frrs1	Izumo1r	Fam234b	Irf2bpl
Osbp	Col4a3bp	Csnk2a2	Fry	Jade2	Fam241a	Irs1
Osbpl2	Col6a6	Cspp1	Fryl	Jagn1	Fam32a	Irs2
Osbpl8	Colgalt1	Csrp1	Fth1	Jak1	Fam3c	Irx2
Osgin2	Commd10	Cstb	Ftl1	Jak2	Fam43a	Itch
Ost4	Commd2	Cstf1	Fto	Jarid2	Fam49b	Itfg1
Ostc	Commd3	Cstf2t	Fubp1	Jmjd1c	Fam53c	Itgav
Ostf1	Commd4	Cstf3	Fubp3	Jmjd4	Fam76a	Itgb1
Otud4	Commd6	Ctbp1	Fundc1	Jmy	Fam76b	Itgb5
Otulin	Commd7	Ctcf	Fundc2	Jpt2	Fam8a1	Itm2b
Otulinl	Commd8	Ctdnep1	Furin	Junb	Fam91a1	Itpkb
Oxa1l	Comt	Ctdp1	Fus	Jund	Fam98b	Itpr1
Oxct1	Cop1	Ctdsp1	Fut11	Kansl1	Fancd2	Itprid2
P2ry10	Copa	Ctdsp2	Fxn	Kansl1l	Fancm	Itpripl2
P4ha1	Copb1	Ctdspl2	Fxr1	Kantr	Far1	Ivns1abp
P4hb	Copb2	Ctla4	Fxr2	Kat2b	Farp2	Jade1
Pa2g4	Cope	Ctnna1	Fxyd5	Kat5	Farsa	Jag1
Pabpc1	Copg1	Ctnnb1	Fyb	Kat6a	Fas	Jarid2
Pacs1	Copg2	Ctnnbl1	Fyn	Kat6b	Fasn	Jdp2
Pafah1b1	Coprs	Ctns	Fyttd1	Kat7	Fastk	Jmjd1c
Pafah1b2	Cops2	Ctps	Fzd5	Kat8	Fastkd2	Jmy
Pag1	Cops3	Ctps2	Fzr1	Katna1	Fastkd3	Jpt2
Paics	Cops4	Ctr9	G2e3	Katnbl1	Fau	Jund
Paip2	Cops5	Ctsb	G3bp1	Kbtbd11	Fbl	Kalrn
Pak2	Cops7a	Ctsc	G3bp2	Kbtbd2	Fblim1	Kank1
Pan3	Cops8	Ctse	G6pdx	Kcnh7	Fbrs	Kansl1
Pank1	Cops9	Ctss	Gabarap	Kctd2	Fbrsl1	Kansl1l
Pank3	Copz1	Cuedc1	Gabarapl2	Kctd20	Fbxl14	Kansl2
Papola	Coq10b	Cuedc2	Gabbr1	Kctd6	Fbxl17	Kat2b
Papolg	Coq2	Cul1	Gabpa	Kdm1a	Fbxl3	Kat5
Parp11	Coq3	Cul2	Gabpb1	Kdm1b	Fbxo11	Kat6a
Parp14	Coq4	Cul3	Gabpb2	Kdm2a	Fbxo21	Kat6b
Patl1	Coq5	Cul4a	Gak	Kdm3b	Fbxo3	Katna1
Paxip1	Coq6	Cul4b	Galk2	Kdm5a	Fbxo32	Katnbl1
Pbrm1	Coq7	Cul5	Galnt1	Kdm6a	Fbxo33	Kcmf1
Pcbp1	Coro1a	Cul7	Galnt10	Kdm7a	Fbxo34	Kcnab1
Pcf11	Coro1c	Cux1	Galnt11	Khsrp	Fbxo4	Kcnh7
Pclaf	Coro2a	Cwc15	Galnt2l	Kidins220	Fbxo45	Kctd17
Pcmtd1	Coro7	Cwc22	Galnt6	Kif11	Fbxo5	Kctd20
Pcnt	Cotl1	Cwc25	Galnt7	Kif1b	Fbxw11	Kctd6
Pcyox1l	Cox11	Cwc27	Gan	Kif21b	Fbxw2	Kdelr1
Pdcd10	Cox15	Cwf19l2	Gapdh	Kif3b	Fbxw7	Kdelr2
Pdcd11	Cox18	Cx3cr1	Gapvd1	Kif5b	Fcer2a	Kdm1a
Pdcd6ip	Cox5a	Cxcr1	Gar1	Kifc3	Fcgr2b	Kdm1b
Pdcd7	Cox5b	Cxcr4	Gars	Kin	Fcho2	Kdm2a
Pdcl3	Cox6a1	Cxxc1	Gart	Kitl	Fchsd2	Kdm3a
Pde3b	Cox6b1	Cyb561a3	Gata3	Klf13	Fcrl1	Kdm3b
Pde4b	Cox6c	Cyb5a	Gatad1	Klf2	Fcrl5	Kdm4c
Pde7a	Cox7a2	Cyb5b	Gatad2a	Klf3	Fcrla	Kdm5a
Pdhx	Cox7a2l	Cyb5r3	Gatad2b	Klf6	Fem1a	Kdm5c
Pdia6	Cox7b	Cyb5r4	Gatd1	Klhdc1	Fem1b	Kdm6a
Pdik1l	Cox7c	Cyba	Gbf1	Klhdc2	Fem1c	Khdrbs1
Pdlim1	Cox8a	Cybc1	Gbp2	Klhl12	Fen1	Khsrp
Pdlim5	Cpd	Cyc1	Gbp3	Klhl18	Fermt3	Kif11
Pdpk1	Cpeb2	Cyfip1	Gbp4	Klhl20	Ffar1	Kif1b
Pds5a	Cpeb4	Cyfip2	Gbp8	Klhl24	Ffar2	Kif3b
Pds5b	Cplane1	Cyld	Gcc2	Klhl28	Fgl2	Kif4
Pdzd8	Cpne3	Cyp2c29	Gclc	Klhl42	Fhl3	Kif5b
Peak1	Cpne4	Cyp2c66	Gclm	Klhl5	Fip1l1	Kifc3
Pecam1	Cpox	Cyp2c67	Gdap2	Klhl6	Fis1	Kirrel
Peli1	Cpsf1	Cyp2s1	Gdi1	Klhl9	Fkbp15	Kitl
Pes1	Cpsf2	Cyp4f13	Gdi2	Klrg1	Fkbp1a	Klc1
Pex1	Cpsf4	Cyp4f16	Gem	Kmt2a	Fkbp3	Klf3
Pex12	Cpsf6	Cyp4f18	Gemin5	Kmt2b	Fkbp7	Klf5
Pfkp	Cpsf7	Cyp51	Gfod1	Kmt2c	Fkbp8	Klf6
Pglyrp2	Cpt1a	Cysltr1	Gga3	Kmt2d	Flcn	Klf9
Pgpep1l	Cptp	Cystm1	Ggact	Kmt2e	Fli1	Klhdc2
Phb2	Cr1l	Cyth1	Ggnbp2	Kmt5b	Flna	Klhl20
Phc3	Cradd	Cyth2	Ggps1	Kpna3	Flt3	Klhl22
Phf10	Cramp1l	Cyth3	Ggta1	Kpna4	Flvcr1	Klhl24
Phf12	Crbn	Cyth4	Ghitm	Kpnb1	Fmc1	Klhl5
Phf13	Crcp	Cytip	Gid4	Krit1	Fmnl1	Klhl9
Phf20	Creb1	D030056L22Rik	Gid8	Krr1	Fmnl3	Kmt2a
Phf3	Crebbp	D10Wsu102e	Gigyf1	L1cam	Fmr1	Kmt2c
Phf6	Crebl2	D16Ertd472e	Gigyf2	L3mbtl2	Fnbp1	Kmt2d
Phf8	Crebrf	D230025D16Rik	Gimap3	L3mbtl3	Fnbp4	Kmt2e
Phlpp1	Crebzf	D2hgdh	Gimap4	Lamp1	Fndc3a	Kmt5b
Pias1	Crem	D5Ertd579e	Gimap6	Lamp2	Fndc3b	Kmt5c
Pias2	Crim1	D630039A03Rik	Gimap8	Lamtor3	Fnip1	Knl1
Pias3	Crip1	Daam1	Gimap9	Laptm4a	Focad	Kpna1
Picalm	Cript	Dab1	Git1	Laptm5	Fos	Kpna3
Piezo1	Crk	Dach2	Git2	Larp4b	Fosb	Kpna4
Pik3ca	Crkl	Dad1	Glb1	Lars	Fosl2	Kpnb1
Pik3cd	Crlf3	Dag1	Gle1	Lars2	Foxj2	Kras
Pik3r1	Crls1	Daglb	Glg1	Lasp1	Foxj3	Krit1
Pik3r4	Crnkl1	Dalrd3	Glipr1	Lats1	Foxk1	Krr1
Pikfyve	Crot	Dap	Glipr2	Lbh	Foxn2	Ktn1
Pim1	Crtc1	Dap3	Glo1	Lbr	Foxn3	L3mbtl2
Pim2	Crtc2	Dapl1	Glrx	Lck	Foxo1	L3mbtl3
Pip4k2c	Crtc3	Dapp1	Gls	Lcp1	Foxo3	Lamb1
Pip4p2	Cry1	Dars	Glt8d1	Lcp2	Foxp1	Lamc1
Pip5k1a	Crybg1	Dazap1	Gltp	Ldha	Frat2	Lamp1
Pisd	Crybg3	Dazap2	Glul	Ldlrad4	Frg1	Lamp2
Pitpnc1	Cryl1	Dbf4	Glyr1	Lef1	Frrs1	Lamtor1
Pkp3	Cs	Dbi	Gm10521	Lemd3	Frs2	Lamtor3
Plaa	Csde1	Dbnl	Gm10778	Leng8	Fry	Lap3
Plac8	Cse1l	Dbr1	Gm12185	Leprotl1	Fryl	Laptm4a
Plagl2	Csgalnact1	Dbt	Gm13212	Lfng	Fscn1	Large1
Plcl2	Csk	Dcaf1	Gm20696	Lgals1	Fth1	Larp4
Plec	Csnk1a1	Dcaf10	Gm21992	Lig4	Ftl1	Larp4b
Plekha5	Csnk1d	Dcaf11	Gm28053	Limd1	Ftl1-ps1	Lars
Plekhm2	Csnk1g1	Dcaf12	Gm2a	Limd2	Fubp1	Lars2
Plk1	Csnk1g2	Dcaf13	Gm42715	Lims1	Fubp3	Lasp1
Plrg1	Csnk1g3	Dcaf15	Gm44511	Lin7c	Fundc1	Lbh
Pmaip1	Csnk2a1	Dcaf17	Gm4951	Lipa	Fundc2	Lbr
Pmpca	Csnk2a2	Dcaf5	Gm527	Lmnb1	Furin	Lcor
Pmpcb	Csnk2b	Dcaf6	Gm7072	Lmo7	Fus	Lcorl
Pnisr	Cspp1	Dcaf7	Gmeb2	Lnpep	Fut11	Ldha
Pnrc2	Csrp1	Dcaf8	Gmfb	Lonp2	Fxr1	Ldlr
Poglut1	Cst3	Dchs2	Gmfg	Lpar6	Fxr2	Ldlrad3
Polb	Cst7	Dck	Gmip	Lpin1	Fyb	Ldlrad4
Pold3	Cstf1	Dclre1a	Gmnn	Lpin2	Fyco1	Lemd3
Poldip3	Cstf2	Dclre1b	Gmps	Lpp	Fyn	Leng8
Pole	Cstf2t	Dcp1a	Gna13	Lpxn	Fyttd1	Leprotl1
Pole2	Cstf3	Dcp2	Gna15	Lratd2	Fzr1	Lfng
Polg	Ctbp1	Dctn3	Gnai2	Lrba	G2e3	Lgals1
Polr1c	Ctcf	Dctn4	Gnai3	Lrch1	G3bp1	Lgr4
Polr2e	Ctdnep1	Dctn5	Gnaq	Lrch3	G3bp2	Lhfp
Polr2m	Ctdp1	Dctn6	Gnas	Lrig1	Gabarap	Lhx9
Polr3f	Ctdsp1	Dcun1d1	Gnb1	Lrig2	Gabarapl2	Lig4
Pot1a	Ctdsp2	Dcun1d2	Gng2	Lrmp	Gabbr1	Limd1
Pou2f1	Ctdspl2	Dcun1d3	Gnl3	Lrp12	Gabpa	Lims1
Ppa1	Ctif	Dcun1d4	Gnl3l	Lrp6	Gabpb1	Lin54
Ppan	Ctla4	Dcun1d5	Gnpat	Lrrc58	Gabpb2	Lin7c
Ppfia1	Ctnna1	Dda1	Gnpda1	Lrrc61	Gadd45b	Lin9
Ppib	Ctnnb1	Ddb1	Golga1	Lrrc8c	Gak	Lipa
Ppil1	Ctnnbl1	Ddb2	Golga3	Lrrfip1	Galk2	Lix1l
Ppip5k2	Ctns	Ddi2	Golga4	Lsamp	Galnt1	Lman1
Ppm1g	Ctps	Ddit4	Golga7	Lsm12	Galnt11	Lman2
Ppm1h	Ctps2	Ddost	Golph3	Lsm14a	Galnt2l	Lmbr1
Ppp1cb	Ctr9	Ddr1	Gopc	Lsm14b	Ganab	Lmbrd2
Ppp1r10	Ctsb	Ddx1	Gorasp2	Lsm2	Gapdh	Lmna
Ppp1r12a	Ctsc	Ddx10	Gosr1	Lsm3	Gapvd1	Lmnb1
Ppp1r15b	Ctsd	Ddx17	Gpat4	Lsp1	Gars	Lmo4
Ppp1r16b	Ctss	Ddx19a	Gpatch2	Lta	Gatad2a	Lmo7
Ppp1r18	Ctsw	Ddx19b	Gpatch8	Lta4h	Gatad2b	Lnpep
Ppp1r9b	Cuedc1	Ddx21	Gpbp1	Ltb	Gbf1	Lnpk
Ppp2r2a	Cuedc2	Ddx23	Gpbp1l1	Ltn1	Gbp2	Lox
Ppp2r5a	Cul1	Ddx27	Gpcpd1	Luc7l2	Gbp3	Lpar1
Ppp2r5c	Cul2	Ddx39b	Gpd1l	Luc7l3	Gbp8	Lpin1
Ppp2r5e	Cul3	Ddx3x	Gpd2	Ly6c1	Gcc2	Lpin2
Ppp4r2	Cul4a	Ddx3y	Gphn	Ly6c2	Gch1	Lpp
Ppp4r3a	Cul4b	Ddx41	Gpi1	Ly6e	Gclc	Lratd2
Ppp4r3b	Cul5	Ddx42	Gpkow	Ly75	Gclm	Lrch1
Ppp5c	Cul7	Ddx46	Gpr132	Lysmd3	Gdap2	Lrch3
Ppp6c	Cuta	Ddx47	Gpr171	Lyst	Gdi1	Lrig2
Ppp6r3	Cux1	Ddx5	Gpr174	M6pr	Gdi2	Lrp1
Pptc7	Cwc15	Ddx50	Gpr183	Macf1	Gem	Lrp12
Prc1	Cwc22	Ddx52	Gprin3	Macroh2a1	Gemin5	Lrp1b
Prdm2	Cwc25	Ddx55	Gpx4	Madd	Gemin7	Lrp5
Prdm4	Cwc27	Ddx58	Gramd1b	Maf1	Gfpt1	Lrp6
Prelid1	Cwf19l1	Ddx6	Gramd3	Mafk	Gfra3	Lrrc58
Prex1	Cwf19l2	Deaf1	Gramd4	Magt1	Gga2	Lrrc59
Prkab1	Cx3cr1	Decr2	Grap	Mak16	Gga3	Lrrc75b
Prkag1	Cxcr3	Def6	Grap2	Malsu1	Ggnbp2	Lrrfip1
Prkar1a	Cxcr4	Degs1	Grb2	Malt1	Ggta1	Lrrfip2
Prkar2a	Cxcr6	Dek	Grik5	Maml2	Ghitm	Lsamp
Prkch	Cxxc1	Dennd11	Gripap1	Man1a	Gid4	Lsm12
Prkci	Cyb561a3	Dennd1a	Grk2	Man1a2	Gid8	Lsm14a
Prkcq	Cyb561d1	Dennd1b	Grk6	Man2a1	Gigyf1	Lsm14b
Prkd2	Cyb5a	Dennd1c	Grm8	Man2b1	Gigyf2	Lsm2
Prkdc	Cyb5b	Dennd2c	Grpel1	Manba	Gimap3	Lsm3
Prpf38a	Cyb5r1	Dennd2d	Gsk3a	Manea	Gimap4	Lss
Prpf38b	Cyb5r3	Dennd3	Gsk3b	Map2k1	Gimap6	Lta4h
Prpf39	Cyb5r4	Dennd4a	Gspt1	Map3k1	Gimap9	Ltbp1
Prpf40a	Cyba	Dennd4b	Gtf2a1	Map3k2	Gins1	Ltbp3
Prpf4b	Cybc1	Dennd4c	Gtf2a2	Map3k4	Git1	Ltn1
Prpf8	Cyc1	Dennd5a	Gtf2b	Map3k5	Git2	Ltv1
Prpsap1	Cyfip1	Dennd6a	Gtf2h2	Map3k8	Gk	Luc7l2
Prr11	Cyfip2	Denr	Gtf2h4	Map4k3	Gla	Luc7l3
Prr3	Cyhr1	Depdc1a	Gtf2i	Map4k4	Glb1	Luzp1
Prrc2c	Cyld	Depdc1b	Gtf3c3	Map4k5	Glg1	Ly75
Prrg4	Cyp20a1	Depdc5	Gtpbp1	Map7	Glipr1	Lysmd3
Psap	Cyp4f13	Derl1	Gtpbp2	Map7d1	Glipr2	Lysmd4
Psd4	Cyp4f16	Derl2	Gtpbp4	Mapk1	Gls	Lzts2
Psen1	Cyp4f18	Desi2	Gtpbp8	Mapk12	Glt8d1	M6pr
Psma1	Cyp51	Det1	Gtse1	Mapk1ip1l	Gltp	Macf1
Psmb8	Cysltr1	Dgat1	Gvin1	Mapk8	Glud1	Mad2l1
Psmd8	Cystm1	Dgcr8	Gzf1	Mapk9	Glul	Maf
Psme3	Cyth1	Dgka	Gzmb	Mapre1	Glyr1	Mafk
Psme4	Cyth2	Dgkb	H1f0	Marchf6	Gm10184	Maged1
Ptbp1	Cyth3	Dgkd	H1f1	Marchf7	Gm10282	Magi1
Ptbp3	Cyth4	Dgkh	H1f2	Marf1	Gm10801	Magi3
Ptcd2	Cytip	Dgkz	H1f3	Mark2	Gm13212	Magt1
Ptdss1	D030056L22Rik	Dglucy	H1f4	Mast2	Gm20489	Malsu1
Pten	D10Wsu102e	Dhcr24	H1f5	Mast4	Gm28053	Maml1
Ptger4	D130040H23Rik	Dhcr7	H2-D1	Mat2a	Gm2a	Maml2
Ptgr2	D16Ertd472e	Dhdds	H2-K1	Mat2b	Gm3550	Man1a
Ptp4a2	D1Ertd622e	Dhx15	H2-M3	Matr3	Gm4070	Man1a2
Ptp4a3	D230025D16Rik	Dhx29	H2-Q4	Mau2	Gm44511	Man1c1
Ptpn18	D2hgdh	Dhx30	H2-Q6	Max	Gm45844	Man2a1
Ptpn22	D3Ertd751e	Dhx35	H2-Q7	Mbd2	Gm527	Manea
Ptpn4	D5Ertd579e	Dhx36	H2ac10	Mbd5	Gm5431	Manf
Ptpn7	D630039A03Rik	Dhx38	H2ac11	Mbip	Gm6169	Map3k1
Ptpra	D630045J12Rik	Dhx40	H2ac15	Mblac2	Gm6377	Map3k2
Ptprc	Daam1	Dhx8	H2ac20	Mbnl1	Gm7609	Map3k20
Ptpre	Dab1	Dhx9	H2ac4	Mboat1	Gm8369	Map3k3
Purb	Dach2	Diaph1	H2ac7	Mboat7	Gmeb2	Map3k4
Pus10	Dad1	Diaph2	H2ac8	Mbp	Gmfb	Map3k5
Pwp1	Dag1	Diaph3	H2aj	Mbtps1	Gmip	Map3k8
Qars	Daglb	Dicer1	H2ax	Mcl1	Gmnn	Map4
Qk	Dalrd3	Dido1	H2az1	Mcm3ap	Gmps	Map4k3
R3hdm1	Dap	Dimt1	H2az2	Mcts1	Gna13	Map4k4
R3hdm4	Dap3	Dip2b	H2bc11	Mdfic	Gnai2	Map4k5
Rab10	Dapk2	Dip2c	H2bc12	Mdh1	Gnai3	Map7d1
Rab14	Dapp1	Dipk1a	H2bc13	Mdm2	Gnaq	Mapk1
Rab19	Dars	Dipk1b	H2bc14	Mdm4	Gnas	Mapk12
Rab1a	Daxx	Dipk2a	H2bc15	Mecp2	Gnb1	Mapk1ip1l
Rab21	Dazap1	Dis3	H2bc18	Med1	Gng12	Mapk8
Rab27a	Dazap2	Dis3l2	H2bc3	Med12	Gng2	Mapre1
Rab35	Dbf4	Dkc1	H2bc4	Med13	Gng5	Marchf1
Rab37	Dbi	Dld	H2bc6	Med13l	Gnl3	Marchf6
Rab3gap1	Dbnl	Dlg1	H2bc8	Med14	Gnl3l	Marchf7
Rab5c	Dbr1	Dlg2	H2bc9	Med15	Gnpat	Marcks
Rab7	Dbt	Dlg4	H3c1	Med17	Gnptab	Marcksl1
Rabep1	Dcaf1	Dlgap4	H3c10	Med23	Golga4	Mark2
Rabgap1	Dcaf10	Dlgap5	H3c11	Med30	Golga7	Mast2
Rabl6	Dcaf11	Dmap1	H3c13	Med4	Golgb1	Mast4
Rac2	Dcaf12	Dmtf1	H3c2	Mef2a	Golph3	Mat2a
Rack1	Dcaf13	Dmxl1	H3c3	Mef2d	Golph3l	Mat2b
Rad21	Dcaf15	Dna2	H3c6	Mepce	Gopc	Maz
Rad54l	Dcaf17	Dnah8	H3c7	Metap1	Gorasp2	Mbd2
Ralgapb	Dcaf5	Dnaja1	H3c8	Mettl15	Gosr1	Mbd5
Ramac	Dcaf7	Dnaja2	H3f3a	Mettl17	Got1	Mbd6
Ran	Dcaf8	Dnajb1	H3f3b	Mettl23	Got2	Mbip
Ranbp1	Dcbld2	Dnajb12	H4c1	Mettl8	Gpalpp1	Mbnl1
Ranbp2	Dchs2	Dnajb13	H4c11	Mex3b	Gpat4	Mbnl2
Ranbp3	Dck	Dnajb14	H4c12	Mfhas1	Gpatch2l	Mboat1
Ranbp9	Dclre1a	Dnajb6	H4c14	Mfn1	Gpatch8	Mbtps1
Rap1b	Dclre1b	Dnajb9	H4c2	Mfsd1	Gpbp1	Mcc
Rapgef2	Dcp1a	Dnajc1	H4c3	Mfsd14a	Gpbp1l1	Mcl1
Rapgef6	Dcp2	Dnajc10	H4c4	Mfsd8	Gpcpd1	Mcm2
Rara	Dcps	Dnajc13	H4c6	Mga	Gpd1l	Mcm3
Rasa2	Dctn3	Dnajc14	H4c8	Mgat1	Gpd2	Mcm4
Rasa3	Dctn4	Dnajc15	Hacd3	Mgat4a	Gphn	Mcm6
Rasgrp1	Dctn5	Dnajc16	Hace1	Mgat5	Gpkow	Mcmbp
Rassf3	Dctn6	Dnajc18	Hadh	Mgrn1	Gpm6a	Mcts1
Rassf5	Dctpp1	Dnajc2	Hadhb	Mgst2	Gpr107	Mcu
Rb1	Dcun1d1	Dnajc21	Hars2	Mia2	Gpr132	Mdc1
Rb1cc1	Dcun1d2	Dnajc24	Hat1	Mia3	Gpr171	Mdfic
Rbbp4	Dcun1d3	Dnajc3	Haus6	Mical3	Gpr174	Mdh1
Rbbp5	Dcun1d4	Dnajc30	Hcfc1	Midn	Gpr18	Mdm4
Rbbp6	Dcun1d5	Dnajc5	Hcfc2	Mier1	Gpr183	Med1
Rbbp7	Dda1	Dnajc7	Hcls1	Mier3	Gpr65	Med13
Rbbp8	Ddb1	Dnajc8	Hdac1	Miga2	Gpx1	Med13l
Rbl1	Ddb2	Dnajc9	Hdac2	Mindy2	Gramd3	Med14
Rbm15	Ddhd1	Dnase2a	Hdac4	Mindy3	Gramd4	Med15
Rbm22	Ddhd2	Dnm1l	Hdac7	Minpp1	Grap	Med17
Rbm26	Ddi2	Dnm2	Hdac8	Mios	Grap2	Med23
Rbm3	Ddias	Dnmt1	Hdgf	Mipol1	Grb2	Med31
Rbm33	Ddit4	Dnmt3a	Hdlbp	Mki67	Gripap1	Mef2a
Rbm34	Ddost	Dntt	Heatr1	Mkln1	Grk2	Mef2d
Rbm39	Ddr1	Dnttip1	Heatr5a	Mknk1	Grk6	Megf8
Rbm7	Ddx1	Dnttip2	Heca	Mknk2	Grn	Megf9
Rbms1	Ddx10	Dock10	Hectd1	Mkrn1	Grsf1	Meis1
Rbms2	Ddx17	Dock11	Hectd4	Mlec	Gsk3a	Meis2
Rbpj	Ddx19a	Dock2	Heg1	Mlh3	Gsk3b	Mest
Rc3h1	Ddx19b	Dock5	Helb	Mllt10	Gspt1	Met
Rc3h2	Ddx20	Dock8	Hells	Mllt3	Gtdc1	Mettl16
Rcbtb1	Ddx21	Dock9	Helz	Mllt6	Gtf2a1	Mex3a
Rcc1	Ddx23	Dok2	Hemgn	Mlxip	Gtf2a2	Mex3b
Rchy1	Ddx27	Donson	Herc1	Mlycd	Gtf2b	Mex3d
Rcl1	Ddx39	Dop1a	Herc2	Mmd	Gtf2e1	Mfn1
Rcn1	Ddx39b	Dop1b	Herc3	Mnat1	Gtf2h1	Mfsd1
Rcor1	Ddx3x	Dpagt1	Herc6	Mnt	Gtf2h2	Mfsd14a
Rcsd1	Ddx3y	Dpf3	Herpud1	Mob1a	Gtf2h5	Mfsd14b
Rdx	Ddx41	Dph3	Herpud2	Mob1b	Gtf3c3	Mfsd8
Rel	Ddx42	Dph5	Hexb	Mob4	Gtpbp1	Mga
Relch	Ddx46	Dph6	Hexim1	Mon2	Gtpbp10	Mgat1
Rer1	Ddx47	Dpp4	Hif1a	Morc3	Gtpbp2	Mgat3
Rere	Ddx5	Dpp8	Higd1a	Mosmo	Gtpbp4	Mgat5
Resf1	Ddx50	Dpy19l1	Hikeshi	Mospd3	Gtpbp8	Mia2
Rest	Ddx51	Dpy19l3	Hilpda	Mphosph6	Gtse1	Mia3
Retreg1	Ddx52	Dpy19l4	Hinfp	Mphosph8	Gusb	Mical2
Rfc1	Ddx55	Dpy30	Hint1	Mplkip	Gvin1	Mical3
Rfx3	Ddx56	Dpysl2	Hipk1	Mpp5	Gzmb	Mid1
Rfx7	Ddx58	Dr1	Hipk2	Mpp7	H13	Midn
Rgp1	Ddx6	Dram2	Hipk3	Mppe1	H1f0	Mier1
Rgs12	Deaf1	Drap1	Hira	Mpped2	H1f1	Mier3
Rhoa	Decr1	Drc1	Hist1h2an	Mrfap1	H1f2	Miga2
Rhog	Decr2	Drg1	Hist1h4m	Mroh1	H1f3	Minpp1
Rhoh	Dedd	Drosha	Hist1h4n	Mrpl1	H1f4	Mis18a
Ric1	Dedd2	Dsc3	Hivep1	Mrpl10	H1f5	Mki67
Rif1	Degs1	Dse	Hivep2	Mrpl14	H2-Aa	Mkln1
Rin3	Dek	Dsn1	Hjurp	Mrpl45	H2-Ab1	Mlec
Rinl	Dennd11	Dst	Hk1	Mrpl51	H2-D1	Mlf2
Riox1	Dennd1a	Dstyk	Hk2	Mrps14	H2-DMa	Mllt10
Ripor2	Dennd1b	Dtl	Hltf	Mrps28	H2-DMb1	Mllt3
Rlim	Dennd1c	Dtnb	Hmbox1	Mrps33	H2-DMb2	Mlxip
Rmi2	Dennd2d	Dtwd2	Hmgb1	Mrps36	H2-Eb1	Mlycd
Rnf10	Dennd3	Dtx3	Hmgb2	Mrtfa	H2-K1	Mmadhc
Rnf115	Dennd4a	Dtx3l	Hmgcl	Ms4a4b	H2-M3	Mmd
Rnf144a	Dennd4b	Dtymk	Hmgcr	Ms4a6b	H2-Ob	Mmp11
Rnf168	Dennd4c	Dusp1	Hmgcs1	Ms4a6c	H2-Q4	Mmp14
Rnf169	Dennd5a	Dusp10	Hmgn1	Msantd2	H2-Q6	Mmp2
Rnf185	Dennd6a	Dusp11	Hmgn2	Msantd4	H2-Q7	Mn1
Rnf187	Denr	Dusp12	Hmgxb3	Msi2	H2-T22	Mob1a
Rnf19a	Depdc1a	Dusp2	Hmgxb4	Msl2	H2-T23	Mob1b
Rnf2	Depdc1b	Dusp22	Hmmr	Msl3	H2ac20	Mob4
Rnf227	Depdc5	Dusp5	Hnrnpa0	Msmo1	H2ac7	Mogs
Rnf38	Dera	Dusp6	Hnrnpa1	Msn	H2ac8	Mon2
Rnf7	Derl1	Dusp7	Hnrnpa2b1	Mta2	H2ax	Morc2a
Rnft1	Derl2	Dut	Hnrnpa3	Mtarc2	H2az1	Morc3
Rngtt	Desi1	Dvl2	Hnrnpab	Mtbp	H2az2	Morf4l2
Rock1	Desi2	Dvl3	Hnrnpc	Mtdh	H2bc11	Mosmo
Rock2	Det1	Dym	Hnrnpd	Mterf1b	H2bc12	Mospd2
Rpe	Dgat1	Dync1h1	Hnrnpdl	Mtf1	H2bc15	Mphosph6
Rpf1	Dgcr8	Dync1i2	Hnrnpf	Mtf2	H2bc18	Mphosph8
Rpl22l1	Dgka	Dync1li1	Hnrnph1	Mtfmt	H2bc3	Mpp5
Rpl30	Dgkd	Dync1li2	Hnrnph3	Mthfd1l	H2bc4	Mpp6
Rpl32	Dgke	Dynll1	Hnrnpk	Mthfd2	H2bc6	Mpped2
Rpl34	Dgkh	Dynll2	Hnrnpl	Mtmr1	H2bc8	Mprip
Rpl38	Dgkz	Dynlrb1	Hnrnpll	Mtmr12	H2bc9	Mras
Rpl39	Dglucy	Dyrk1a	Hnrnpm	Mtmr14	H3c1	Mrc2
Rpl4	Dguok	Dyrk2	Hnrnpr	Mtmr3	H3c11	Mrfap1
Rpl7	Dhcr24	Dyrk3	Hnrnpu	Mtmr6	H3c3	Mroh1
Rpl7l1	Dhcr7	Dysf	Hnrnpul1	Mtmr9	H3c6	Mrpl1
Rpl8	Dhdds	Dzip3	Hook3	Mtpn	H3c7	Mrpl22
Rplp0	Dhrs13	E130114P18Rik	Hp1bp3	Mtrex	H3f3a	Mrpl34
Rplp1	Dhx15	E130308A19Rik	Hpcal1	Mtrr	H3f3b	Mrpl50
Rpn1	Dhx16	E130309D02Rik	Hprt	Mtss1	H4c1	Mrps14
Rps11	Dhx29	E2f2	Hps3	Mxi1	H4c11	Mrps28
Rps14	Dhx30	E2f3	Hrh2	Myb	H4c12	Mrps36
Rps15a	Dhx33	E2f4	Hs2st1	Myc	H4c14	Mrtfa
Rps16	Dhx35	E2f7	Hs3st3b1	Myh9	H4c2	Mrtfb
Rps20	Dhx36	E2f8	Hs6st3	Myl6	H4c3	Msi2
Rps21	Dhx38	Eaf1	Hsbp1	Mylip	H4c4	Msl2
Rps24	Dhx40	Eapp	Hsd11b1	Myo18a	H4c6	Msl3
Rps25	Dhx8	Ebag9	Hsd17b4	Myo5a	H4c8	Msmo1
Rps27l	Dhx9	Ebi3	Hsd17b7	Myo9b	H4c9	Msn
Rps27rt	Diaph1	Ece1	Hsdl2	Mysm1	H4f16	Msrb3
Rps3	Diaph2	Ech1	Hsf2	Mzt1	Haao	Mta2
Rps3a1	Diaph3	Echdc1	Hsp90aa1	N4bp2	Hacd2	Mtbp
Rps5	Dicer1	Echs1	Hsp90ab1	N4bp2l1	Hadh	Mtdh
Rps6ka1	Dido1	Ecm1	Hsp90b1	N4bp2l2	Hadhb	Mtf2
Rps6ka3	Dimt1	Ecpas	Hspa14	Naa15	Hars2	Mtfr1
Rps9	Dip2a	Ect2	Hspa4	Naa30	Hat1	Mthfd1l
Rpusd4	Dip2b	Edc3	Hspa5	Naa35	Haus2	Mthfd2
Rras2	Dip2c	Edc4	Hspa8	Naa50	Haus6	Mtmr1
Rrm2	Dipk1a	Edem1	Hspa9	Nabp1	Haus7	Mtmr12
Rrp1b	Dipk1b	Edem3	Hspbp1	Naca	Hbp1	Mtmr14
Rsbn1	Dipk2a	Eea1	Hspd1	Nadk	Hccs	Mtrex
Rsbn1l	Dis3	Eed	Hspe1	Nampt	Hcfc1	Mtrr
Rtn3	Dis3l2	Eef1a1	Htatsf1	Nap1l1	Hcls1	Mtss1
Rtp4	Disc1	Eef1b2	Htr1b	Nap1l4	Hdac1	Mxi1
Rundc3b	Disp1	Eef1d	Hus1	Napepld	Hdac3	Mxra8
Runx1	Dkc1	Eef1g	Huwe1	Nars2	Hdac5	Myc
Rxra	Dkk1	Eef2	Hvcn1	Nasp	Hdac7	Mycn
S100a10	Dlat	Eefsec	Hyal2	Nbeal2	Hdgf	Myef2
S1pr1	Dlc1	Efcab14	Hyou1	Nbn	Hdlbp	Myh10
Sacm1l	Dld	Efcab6	Hypk	Nbr1	Heatr1	Myh9
Sacs	Dleu7	Efhd2	Iars	Ncapd2	Heca	Myl6
Samhd1	Dlg1	Efl1	Iars2	Ncapd3	Hectd1	Myo10
Sar1b	Dlg2	Efna4	Icam1	Ncbp3	Hectd4	Myo1e
Saraf	Dlg4	Efr3a	Icam2	Nck1	Heg1	Myo5a
Sart3	Dlgap4	Eftud2	Ice1	Nckap1l	Helb	Myo9a
Sash3	Dlgap5	Egln1	Icos	Ncl	Hells	Myo9b
Satb1	Dlst	Egln3	Id1	Ncoa1	Helz2	Myof
Scaf11	Dmac2	Egr1	Id2	Ncoa2	Hemgn	Myrf
Scaf8	Dmap1	Egr3	Id3	Ncoa3	Herc1	Mzt1
Scamp2	Dmtf1	Ehhadh	Ide	Ncoa6	Herc2	N4bp2
Scarb2	Dmxl1	Ehmt1	Idh3a	Ncoa7	Herc3	N4bp2l2
Scd2	Dna2	Ehmt2	Ier3	Ncor1	Herc4	Naa15
Sco1	Dnah8	Ei24	Ier5	Ncstn	Herc6	Naa35
Scrib	Dnaja1	Eid1	Ifi203	Ndel1	Herpud1	Naa50
Scyl2	Dnaja2	Eif1	Ifi206	Ndfip1	Herpud2	Naca
Sdcbp	Dnaja3	Eif1a	Ifi209	Ndfip2	Hes5	Nacc1
Sdf4	Dnajb1	Eif1b	Ifi27l2a	Ndst2	Hexb	Nacc2
Sdha	Dnajb11	Eif2a	Ifit2	Ndufa4	Hexim1	Nadk
Sec14l1	Dnajb12	Eif2ak1	Ifnar1	Ndufa6	Higd1a	Nampt
Sec22a	Dnajb13	Eif2ak3	Ifngr1	Ndufs7	Hilpda	Nap1l1
Sec22c	Dnajb14	Eif2ak4	Ift80	Ndufv1	Hinfp	Nap1l4
Sec24b	Dnajb4	Eif2b4	Igf1r	Ndufv2	Hint1	Nasp
Sec24c	Dnajb6	Eif2b5	Igf2r	Nedd1	Hip1r	Nav1
Sec24d	Dnajb9	Eif2d	Igfbp4	Nedd9	Hipk1	Nav2
Sec62	Dnajc1	Eif2s1	Igip	Nek1	Hipk2	Nbea
Secisbp2l	Dnajc10	Eif2s2	Iigp1	Nek7	Hipk3	Nbeal1
Seh1l	Dnajc13	Eif2s3x	Ikbke	Nek9	Hist1h4n	Nbn
Sel1l	Dnajc14	Eif2s3y	Ikzf1	Nell1	Hivep1	Nbr1
Selenof	Dnajc15	Eif3a	Ikzf3	Nemf	Hivep2	Ncam1
Sell	Dnajc16	Eif3b	Il10	Nepro	Hivep3	Ncapd2
Selplg	Dnajc2	Eif3c	Il10ra	Neurl1b	Hjurp	Ncapd3
Sem1	Dnajc21	Eif3d	Il16	Neurl3	Hk1	Ncapg2
Sema4b	Dnajc24	Eif3e	Il17ra	Nfat5	Hk2	Ncaph
Sema4d	Dnajc3	Eif3f	Il18rap	Nfatc2	Hmbox1	Nck1
Senp3	Dnajc30	Eif3h	Il19	Nfatc2ip	Hmga1	Nckap1
Senp7	Dnajc5	Eif3j1	Il1r1	Nfatc3	Hmgb1	Ncl
Sephs1	Dnajc7	Eif3k	Il2	Nfe2l1	Hmgb2	Ncoa2
Septin11	Dnajc8	Eif3l	Il20rb	Nfe2l2	Hmgb3	Ncoa3
Septin7	Dnajc9	Eif3m	Il21r	Nfib	Hmgcr	Ncoa6
Septin9	Dnal1	Eif4a1	Il27ra	Nfkb1	Hmgcs1	Ncor1
Serbp1	Dnase2a	Eif4a2	Il2ra	Nfkbia	Hmgn1	Ncstn
Serinc1	Dnm1l	Eif4a3	Il2rb	Nfkbid	Hmgn2	Ndel1
Serinc3	Dnm2	Eif4b	Il31ra	Nfkbiz	Hmgn3	Ndfip1
Sertad3	Dnmbp	Eif4e	Il4	Nfx1	Hmgxb3	Ndst1
Sesn1	Dnmt1	Eif4e2	Il4ra	Nfxl1	Hmgxb4	Ndst2
Sesn3	Dnmt3a	Eif4ebp1	Il6ra	Nfyb	Hmmr	Ndufa4
Set	Dnttip1	Eif4ebp2	Il7r	Nfyc	Hnrnpa0	Ndufs7
Setd1a	Dnttip2	Eif4enif1	Ilf2	Nhlrc2	Hnrnpa1	Ndufv1
Setd1b	Dock10	Eif4g1	Ilf3	Nin	Hnrnpa2b1	Ndufv2
Setd2	Dock11	Eif4g3	Ilk	Nip7	Hnrnpa3	Nedd1
Setd4	Dock2	Eif4h	Ilrun	Nipbl	Hnrnpab	Nedd4
Setd7	Dock5	Eif5	Immt	Nkap	Hnrnpc	Nedd9
Setdb2	Dock8	Eif5a	Impa1	Nktr	Hnrnpd	Neil3
Setx	Dock9	Eif5a2	Impa2	Nlk	Hnrnpdl	Nek7
Sf3a3	Dok2	Eif5b	Impad1	Nlrc5	Hnrnpf	Neo1
Sf3b1	Dolk	Eipr1	Impdh1	Nme7	Hnrnph1	Net1
Sf3b4	Dolpp1	Elavl1	Impdh2	Nmi	Hnrnph2	Nf1
Sfpq	Donson	Elf1	Incenp	Noc3l	Hnrnpk	Nfat5
Sfswap	Dop1a	Elf2	Inf2	Noc4l	Hnrnpl	Nfatc2ip
Sft2d2	Dop1b	Elf4	Ing1	Nolc1	Hnrnpm	Nfatc3
Sgk1	Dot1l	Elk1	Ing4	Nono	Hnrnpr	Nfe2l1
Sgk3	Dpagt1	Elk3	Ino80	Nop10	Hnrnpu	Nfe2l3
Sgms1	Dpf3	Elk4	Ino80d	Nop53	Hnrnpul1	Nfib
Sgo1	Dph3	Elmo1	Inpp1	Nop56	Hook1	Nfic
Sh2b1	Dph5	Elmo2	Inpp4a	Nop58	Hook3	Nfix
Sh2d3c	Dph6	Elmsan1	Inpp4b	Nop9	Hp1bp3	Nfkb1
Sh3bgrl3	Dpp4	Eloa	Inpp5b	Notch1	Hpcal1	Nfkbia
Sh3bp2	Dpp8	Eloc	Inpp5d	Notch2	Hprt	Nfkbid
Sh3bp5	Dpp9	Elovl5	Inppl1	Npat	Hps3	Nfkbiz
Sh3kbp1	Dpy19l1	Elovl6	Insig1	Npc1	Hps5	Nfxl1
Shisa5	Dpy19l3	Elp2	Insig2	Npc2	Hpse	Nfya
Shprh	Dpy19l4	Elp3	Insr	Npepps	Hs2st1	Nfyb
Sidt1	Dpy30	Elp6	Ints11	Nploc4	Hs3st1	Nfyc
Sik3	Dpysl2	Emb	Ints12	Npm1	Hs6st3	Nid1
Sin3a	Dr1	Emc2	Ints2	Nr1d2	Hsbp1	Ninj1
Sirt3	Dram2	Emc6	Ints3	Nr2c2	Hsd11b1	Ninl
Skap1	Drap1	Emc7	Ints6	Nr3c1	Hsd17b11	Nip7
Skil	Drc1	Emd	Ints7	Nrarp	Hsd17b12	Nipbl
Skp1a	Drg1	Eme1	Ints8	Nrip1	Hsd17b7	Nisch
Sla	Drosha	Emg1	Invs	Nsd1	Hsf2	Nktr
Slain2	Dsc3	Eml2	Ip6k1	Nsd2	Hsp90aa1	Nme7
Slbp	Dse	Eml3	Ipcef1	Nsd3	Hsp90ab1	Nmt2
Slc20a1	Dstyk	Eml4	Ipo11	Nsf	Hsp90b1	Noc3l
Slc23a2	Dtl	Emp1	Ipo7	Nsg2	Hspa13	Noc4l
Slc25a14	Dtnb	Emp3	Ipo9	Nsmce2	Hspa14	Nomo1
Slc25a16	Dtwd2	Emsy	Iqgap1	Nsrp1	Hspa4	Nono
Slc25a3	Dtx3l	Enc1	Iqgap2	Nt5c	Hspa5	Nop10
Slc25a32	Dtymk	Eno1	Ireb2	Nt5c3	Hspa8	Nop56
Slc25a36	Dus4l	Eno1b	Irf1	Nt5c3b	Hspa9	Nop9
Slc25a37	Dusp1	Enox2	Irf2	Nt5dc1	Hspbp1	Notch2
Slc27a4	Dusp10	Enpp4	Irf2bp2	Ntan1	Hspd1	Npas3
Slc28a2b	Dusp11	Ensa	Irf2bpl	Ntng2	Hspe1	Npat
Slc30a4	Dusp12	Entpd5	Irf4	Ntrk3	Hsph1	Npc1
Slc30a5	Dusp2	Entpd7	Irf9	Nucks1	Htra2	Npepps
Slc30a7	Dusp22	Entr1	Irgm1	Nudt21	Huwe1	Nphp1
Slc33a1	Dusp4	Eny2	Irgm2	Nuf2	Hvcn1	Nploc4
Slc35b3	Dusp5	Eogt	Irs2	Nufip2	Hyou1	Npm1
Slc35e3	Dusp6	Ep300	Isca1	Numa1	Iars	Npnt
Slc38a1	Dusp7	Ep400	Isg20l2	Nup107	Ibtk	Nptn
Slc38a2	Dut	Epb41	Isoc2a	Nup153	Icam1	Nr2c2
Slc39a10	Dvl2	Epb41l2	Ist1	Nup210	Ice1	Nr2f2
Slc39a14	Dvl3	Epc1	Itch	Nup214	Id1	Nr3c1
Slc39a9	Dym	Epc2	Itfg1	Nup35	Id2	Nr6a1
Slc41a1	Dync1h1	Epg5	Itga4	Nup50	Id3	Nras
Slc43a2	Dync1i2	Epm2aip1	Itgal	Nup85	Ide	Nrip1
Slc44a2	Dync1li1	Epn1	Itgav	Nus1	Idh3a	Nsd1
Slc6a6	Dynll1	Eprs	Itgb1	Nusap1	Ids	Nsd2
Slc7a1	Dynll2	Eps15	Itgb2	Nxf1	Ier2	Nsd3
Slc9a3r1	Dynlrb1	Eps15l1	Itgb3	Nxpe3	Ier3	Nsmce2
Slc9a9	Dyrk1a	Eps8	Itih2	Oaz1	Ier5	Nt5c
Slf2	Dyrk2	Epsti1	Itk	Ociad1	Ifi203	Nt5c2
Slfn2	Dyrk3	Erap1	Itm2a	Odc1	Ifi209	Nt5c3b
Slfn8	Dysf	Erbb4	Itm2b	Oga	Ifngr1	Ntan1
Slk	Dzip3	Erbin	Itm2c	Ogfr	Ifrd1	Nuak1
Slmap	E130308A19Rik	Erc1	Itpk1	Ogt	Ift140	Nucks1
Sltm	E130309D02Rik	Ercc3	Itpkb	Oma1	Ift46	Nudcd1
Slu7	E2f1	Ercc6l2	Itpr1	Opa1	Igf2r	Nudt21
Smad3	E2f2	Erg28	Itpr2	Orc1	Ik	Nudt4
Smad4	E2f3	Ergic2	Itprid2	Orc4	Ikzf1	Nuf2
Smad7	E2f4	Eri1	Itpripl1	Orc5	Ikzf3	Nufip2
Smarca5	E2f6	Eri2	Itsn2	Os9	Il10	Numa1
Smc2	E2f7	Erich1	Ivns1abp	Osbp	Il10ra	Nup107
Smc3	E2f8	Erlin2	Iws1	Osbpl2	Il10rb	Nup153
Smc4	E430018J23Rik	Ermp1	Izumo1r	Osbpl8	Il16	Nup155
Smchd1	Eaf1	Ero1l	Jade2	Osgin2	Il17ra	Nup160
Smg1	Eapp	Erp44	Jagn1	Ost4	Il1r2	Nup214
Smpdl3a	Ebag9	Errfi1	Jak1	Otud4	Il21r	Nup35
Smu1	Ebi3	Esco1	Jak2	Otulinl	Il2ra	Nup50
Smurf1	Ebna1bp2	Esco2	Jarid2	Oxa1l	Il2rb	Nup54
Smurf2	Ebp	Esf1	Jcad	Oxr1	Il31ra	Nup85
Snap29	Ece1	Espl1	Jmjd1c	P2ry10	Il4ra	Nup93
Snapc1	Ech1	Esr2	Jmjd4	P4ha1	Il5ra	Nus1
Snip1	Echdc1	Esrra	Jmy	Pa2g4	Il6st	Nxf1
Snrnp48	Echs1	Esyt1	Jpt1	Pabpc1	Ilf2	Nxn
Snrnp70	Ecpas	Esyt2	Jpt2	Pabpc4	Ilk	Oaz1
Snrpb	Ect2	Etaa1	Jun	Pacs1	Ilrun	Ocrl
Snrpd1	Edc3	Etf1	Junb	Pafah1b1	Immp2l	Odc1
Sntb1	Edc4	Etfbkmt	Jund	Pafah1b2	Immt	Oga
Sntb2	Edem1	Etfdh	Kansl1	Pag1	Impa1	Ogfr
Snx1	Edem3	Etl4	Kansl1l	Paip2	Impact	Ogt
Snx13	Edf1	Etnk1	Kansl2	Pak2	Impad1	Ola1
Snx14	Edrf1	Ets1	Kantr	Pan3	Impdh2	Olfml2b
Snx25	Eea1	Ets2	Kat2b	Pank3	Incenp	Opa1
Snx27	Eed	Etv3	Kat5	Papola	Inf2	Opa3
Snx5	Eef1a1	Etv6	Kat6a	Papolg	Ing1	Orc1
Soat1	Eef1akmt1	Evi5	Kat6b	Parp11	Ing3	Orc4
Socs1	Eef1aknmt	Evl	Kat7	Parp14	Ing4	Orc5
Socs2	Eef1b2	Ewsr1	Kat8	Parp4	Ino80	Ormdl2
Socs3	Eef1d	Exo1	Katna1	Parp9	Ino80d	Osbp
Socs4	Eef1e1	Exoc1	Katnbl1	Patl1	Inpp4a	Osbpl2
Socs7	Eef1g	Exoc2	Kbtbd11	Paxip1	Inpp4b	Osgin2
Son	Eef2	Exoc3	Kbtbd2	Pbrm1	Inpp5a	Ost4
Sorl1	Eef2k	Exoc4	Kcnab2	Pbx3	Inpp5b	Ostc
Sos2	Eefsec	Exoc5	Kcnh7	Pcbp2	Inpp5d	Otub1
Sp1	Eepd1	Exoc6	Kcnn4	Pcca	Insig1	Otud4
Sp110	Efcab14	Exoc6b	Kctd17	Pced1b	Insig2	Otud7b
Sp2	Efcab6	Exoc8	Kctd2	Pcf11	Insr	Otx1
Sp3	Efcab7	Exosc1	Kctd20	Pcmtd1	Ints11	Oxct1
Sp4	Efhd2	Exosc3	Kctd6	Pcmtd2	Ints12	P3h1
Spag9	Efl1	Exosc5	Kdelr1	Pcyt1a	Ints2	P3h4
Spast	Efna4	Exosc7	Kdm1a	Pdcd10	Ints3	P4ha1
Spata2	Efr3a	Exosc8	Kdm1b	Pdcd11	Ints6	P4hb
Spcs2	Eftud2	Ext1	Kdm2a	Pdcd4	Ints7	Pa2g4
Spen	Egln1	Ext2	Kdm2b	Pdcd6	Ints8	Pabpc1
Spidr	Egln2	Extl2	Kdm3a	Pdcd6ip	Ip6k1	Pacs1
Spin1	Egln3	Eya3	Kdm3b	Pdcd7	Ipmk	Pacs2
Spn	Egr1	Ezh2	Kdm4a	Pdcl3	Ipo11	Pafah1b1
Spop	Egr3	Ezr	Kdm4c	Pde3b	Ipo5	Pafah1b2
Sptbn1	Ehd4	F2r	Kdm5a	Pde4b	Ipo7	Paip1
Sptlc2	Ehmt1	F2rl1	Kdm5b	Pde4d	Ipo8	Paip2
Sptssa	Ehmt2	F8a	Kdm5c	Pde7a	Ipo9	Pak1
Spty2d1	Ei24	Faah	Kdm6a	Pde8a	Iqcb1	Pak2
Srcap	Eid1	Fabp5	Kdm7a	Pdha1	Iqgap1	Pak3
Srebf2	Eif1	Faf1	Khdc4	Pdhx	Iqsec1	Pak7
Srek1	Eif1a	Faf2	Khdrbs1	Pdia6	Irak1	Palld
Srek1ip1	Eif1ad	Faim	Khnyn	Pdik1l	Irak2	Pam
Srgn	Eif1ax	Fam102a	Khsrp	Pdk1	Irak3	Pan3
Sri	Eif1b	Fam104a	Kidins220	Pdlim1	Ireb2	Pank2
Srp68	Eif2a	Fam107b	Kif11	Pdlim5	Irf1	Pank3
Srpk1	Eif2ak1	Fam111a	Kif15	Pdpk1	Irf2	Papola
Srpk2	Eif2ak2	Fam114a2	Kif18a	Pds5a	Irf2bp2	Papolg
Srrm2	Eif2ak3	Fam117a	Kif1b	Pds5b	Irf2bpl	Pard3
Srsf1	Eif2ak4	Fam117b	Kif20a	Pdzd8	Irf4	Parva
Srsf10	Eif2b3	Fam118b	Kif20b	Peak1	Irf5	Patl1
Srsf11	Eif2b4	Fam120a	Kif21b	Pecam1	Irgm1	Pawr
Srsf2	Eif2b5	Fam120b	Kif22	Pef1	Irgq	Paxbp1
Srsf3	Eif2d	Fam120c	Kif2a	Peli1	Irs2	Paxip1
Srsf5	Eif2s1	Fam122b	Kif2c	Pes1	Isca1	Pbrm1
Srsf6	Eif2s2	Fam126a	Kif5b	Pex1	Isca2	Pbx1
Srsf7	Eif2s3x	Fam126b	Kifc1	Pex26	Isg20l2	Pbx3
Ssbp2	Eif2s3y	Fam129a	Kifc3	Pfdn5	Isoc2a	Pcbp1
Ssbp3	Eif3a	Fam133b	Kifc5b	Pfkfb3	Ist1	Pcbp2
Ssh1	Eif3b	Fam13b	Kin	Pfkp	Itch	Pcca
Ssh2	Eif3c	Fam160a2	Kitl	Pfn1	Itfg1	Pcdh18
Ssna1	Eif3d	Fam160b1	Klf13	Pgam1	Itga4	Pcdh7
Ssr3	Eif3e	Fam162a	Klf2	Pglyrp2	Itgal	Pcf11
Ssr4	Eif3f	Fam168a	Klf3	Pgpep1l	Itgav	Pcgf2
St13	Eif3g	Fam168b	Klf6	Phb2	Itgb1	Pclaf
St6gal1	Eif3h	Fam169b	Klf7	Phc3	Itgb2	Pcm1
St8sia4	Eif3i	Fam172a	Klf9	Phf12	Itgb3	Pcmtd1
Stag1	Eif3j1	Fam174a	Klhdc2	Phf13	Itm2b	Pcna
Stag2	Eif3k	Fam189b	Klhl12	Phf14	Itm2c	Pcnt
Stambpl1	Eif3l	Fam192a	Klhl18	Phf2	Itpk1	Pcnx4
Stat1	Eif3m	Fam193a	Klhl20	Phf20	Itpkb	Pcyt1a
Stat4	Eif4a1	Fam199x	Klhl21	Phf20l1	Itpr1	Pdap1
Stat5b	Eif4a2	Fam20b	Klhl24	Phf21a	Itprid2	Pdcd10
Stil	Eif4a3	Fam210a	Klhl28	Phf3	Itsn2	Pdcd11
Stk11ip	Eif4b	Fam214a	Klhl42	Phf6	Ivns1abp	Pdcd7
Stk17b	Eif4e	Fam219a	Klhl5	Phf8	Iws1	Pdcl3
Stk24	Eif4e2	Fam221a	Klhl6	Phip	Jade1	Pde4b
Stk38	Eif4ebp1	Fam222b	Klhl9	Phlpp1	Jade2	Pde4d
Stk4	Eif4ebp2	Fam234b	Kmt2a	Phlpp2	Jak1	Pde7a
Stradb	Eif4enif1	Fam241a	Kmt2b	Phtf2	Jak2	Pdgfra
Strap	Eif4g1	Fam3c	Kmt2c	Pi4k2a	Jarid2	Pdgfrb
Strn	Eif4g2	Fam43a	Kmt2d	Pias1	Jchain	Pdhx
Strn4	Eif4g3	Fam45a	Kmt2e	Pias2	Jmjd1c	Pdia3
Stt3a	Eif4h	Fam49a	Kmt5a	Pias3	Josd1	Pdia4
Stt3b	Eif5	Fam49b	Kmt5b	Pibf1	Jpt1	Pdia5
Sub1	Eif5a	Fam53a	Kmt5c	Picalm	Jpt2	Pdia6
Suclg1	Eif5a2	Fam53c	Knl1	Piezo1	Jtb	Pdlim1
Suclg2	Eif5b	Fam57a	Knop1	Pigc	Jun	Pdlim5
Sufu	Eif6	Fam57b	Kpna1	Pigg	Junb	Pdlim7
Sun2	Eipr1	Fam71b	Kpna3	Pik3c2b	Jund	Pdpk1
Supt16	Elac1	Fam76a	Kpna4	Pik3ca	Kalrn	Pds5a
Suz12	Elavl1	Fam76b	Kpnb1	Pik3cb	Kansl1	Pds5b
Syne3	Elf1	Fam78a	Krcc1	Pik3cd	Kansl2	Pdzd8
Szt2	Elf2	Fam83d	Kremen1	Pik3cg	Kars	Pdzrn3
Tab1	Elf4	Fam8a1	Krit1	Pik3r1	Kat5	Peak1
Tacc3	Elk1	Fam91a1	Krr1	Pik3r4	Kat6a	Peg10
Tada1	Elk3	Fam98a	Ksr1	Pikfyve	Kat6b	Pes1
Taf1	Elk4	Fan1	L1cam	Pim1	Kat7	Pex1
Taf10	Ell	Fancc	L3mbtl2	Pim2	Kat8	Pex2
Taf11	Ell2	Fancd2	L3mbtl3	Pip4k2b	Katna1	Pfdn2
Taf2	Elmo1	Fancl	Lamc1	Pip4k2c	Kbtbd2	Pfn1
Taf4	Elmo2	Fancm	Lamp1	Pip4p2	Kbtbd7	Pgam1
Taf5	Elmod2	Far1	Lamp2	Pip5k1a	Kcmf1	Pgk1
Taf5l	Elmod3	Fars2	Lamtor1	Pip5k1b	Kcnab2	Pgrmc2
Tagap	Elmsan1	Farsa	Lamtor3	Pitpnc1	Kcnn4	Phactr4
Taok1	Eloa	Farsb	Laptm4a	Pkd1	Kctd10	Phb2
Taok2	Elob	Fas	Laptm5	Pkm	Kctd12	Phc3
Taok3	Eloc	Fasn	Larp1	Pkn1	Kctd20	Phf10
Tapbp	Elovl1	Fastk	Larp4b	Pkn2	Kctd6	Phf12
Tardbp	Elovl5	Fastkd2	Lars	Pknox1	Kctd9	Phf13
Tasor	Elovl6	Fastkd3	Lars2	Pkp3	Kdelr1	Phf14
Tasp1	Elp1	Fau	Lasp1	Plaa	Kdelr2	Phf2
Tbc1d15	Elp2	Fbln2	Lat	Plagl2	Kdm1a	Phf20
Tbc1d22b	Elp3	Fbrs	Lats1	Plcl1	Kdm1b	Phf20l1
Tbce	Elp6	Fbrsl1	Lbh	Plcl2	Kdm2b	Phf21a
Tbcel	Emb	Fbxl12	Lbr	Plec	Kdm3a	Phf3
Tbl1x	Emc10	Fbxl14	Lck	Plekha2	Kdm3b	Phf5a
Tbl1xr1	Emc3	Fbxl17	Lcor	Plekha5	Kdm4a	Phip
Tbp	Emc6	Fbxl20	Lcorl	Plekhm2	Kdm5a	Phldb2
Tbpl1	Emc7	Fbxl3	Lcp1	Plk1	Kdm5c	Phlpp1
Tceanc	Emd	Fbxl4	Lcp2	Plod2	Kdm5d	Phlpp2
Tcf12	Eme1	Fbxl5	Ldb1	Plp2	Kdm6a	Pi4k2a
Tcf20	Emg1	Fbxo11	Ldha	Plppr1	Kdm6b	Pias3
Tcf7	Emilin2	Fbxo21	Lef1	Pmpca	Kdm7a	Picalm
Tcp1	Eml2	Fbxo22	Lemd3	Pmpcb	Khdc4	Piezo1
Tctn3	Eml3	Fbxo25	Leng8	Pnisr	Khdrbs1	Pigg
Tdrd3	Eml4	Fbxo28	Leprotl1	Pnn	Khnyn	Pik3c2b
Tent4a	Eml5	Fbxo3	Lfng	Pnpla7	Khsrp	Pik3ca
Tent5a	Emp1	Fbxo32	Lgals1	Pnrc1	Kidins220	Pik3cb
Tent5c	Emp3	Fbxo33	Lif	Pnrc2	Kif11	Pik3r1
Tep1	Emsy	Fbxo34	Lig1	Poc5	Kif14	Pip4p1
Tes	Enah	Fbxo38	Lig4	Poglut1	Kif15	Pip5k1a
Tespa1	Enc1	Fbxo4	Limd1	Polb	Kif16b	Pithd1
Tet2	Endou	Fbxo45	Limd2	Pold3	Kif18b	Pja2
Tet3	Eno1	Fbxo48	Lin54	Pole	Kif20b	Pkd2
Tex261	Enox2	Fbxo5	Lin7c	Pole2	Kif21b	Pkdcc
Tfap4	Enpp4	Fbxo8	Lin9	Polg	Kif22	Pkhd1l1
Tfdp1	Ensa	Fbxo9	Lipa	Polk	Kif23	Pkig
Tfrc	Enthd1	Fbxw11	Lman2	Polr1c	Kif2a	Pkm
Tgfbr1	Entpd1	Fbxw2	Lmnb1	Polr2a	Kif4	Pkn2
Tgfbr2	Entpd5	Fbxw4	Lmo7	Polr2m	Kif5b	Pknox1
Tgfbr3	Entpd6	Fbxw7	Lnpep	Polr3f	Kifc1	Pkp4
Tgoln1	Entpd7	Fbxw8	Lpcat3	Pon2	Klc1	Plagl1
Thoc2	Entr1	Fcho2	Lpin1	Pop5	Klf13	Plagl2
Thy1	Eny2	Fchsd2	Lpin2	Pot1a	Klf2	Platr25
Tigd3	Eogt	Fdx1	Lpp	Pou2f1	Klf3	Plcb3
Timm29	Eomes	Fech	Lpxn	Pou2f2	Klf6	Plce1
Timm44	Ep300	Fem1b	Lratd2	Ppan	Klf7	Plec
Tiprl	Ep400	Fem1c	Lrba	Ppfia1	Klf9	Plekhh2
Tle4	Epb41	Fen1	Lrch1	Pphln1	Klhdc2	Plekhm2
Tm2d1	Epb41l2	Fermt3	Lrch3	Ppia	Klhl12	Plk1
Tm2d3	Epc1	Fez2	Lrig1	Ppig	Klhl21	Plk2
Tm9sf2	Epc2	Fgf13	Lrig2	Ppih	Klhl24	Plod2
Tm9sf3	Epg5	Fgf9	Lrmp	Ppil1	Klhl28	Plod3
Tmc8	Epm2aip1	Fgfr1op	Lrp12	Ppil4	Klhl5	Plp2
Tmco1	Epn1	Fgfr1op2	Lrp5	Ppip5k2	Klhl6	Plpp1
Tmed7	Eprs	Fgfr2	Lrp6	Ppm1b	Klhl9	Plpp2
Tmed9	Eps15	Fggy	Lrp8	Ppm1h	Kmt2a	Plpp3
Tmem104	Eps15l1	Fgl2	Lrrc1	Ppp1ca	Kmt2b	Pls3
Tmem109	Eps8	Fhit	Lrrc58	Ppp1cb	Kmt2c	Plscr1
Tmem123	Epsti1	Fhl3	Lrrc59	Ppp1cc	Kmt2d	Plxdc2
Tmem127	Erap1	Fhod1	Lrrc61	Ppp1r10	Kmt2e	Plxna1
Tmem129	Erbb4	Fignl1	Lrrc8c	Ppp1r12a	Kmt5a	Plxna4
Tmem131	Erbin	Filip1l	Lrrfip1	Ppp1r12b	Kmt5b	Plxnb2
Tmem131l	Erc1	Fip1l1	Lrrfip2	Ppp1r13b	Kpna1	Pmaip1
Tmem164	Ercc3	Fis1	Lsamp	Ppp1r15b	Kpna3	Pmp22
Tmem165	Ercc6l	Fkbp15	Lsm12	Ppp1r16b	Kpna4	Pmpca
Tmem168	Ercc6l2	Fkbp1a	Lsm14a	Ppp1r18	Kpna6	Pmpcb
Tmem170b	Erf	Fkbp3	Lsm14b	Ppp1r21	Kpnb1	Pms1
Tmem192	Erg28	Fkbp5	Lsm2	Ppp1r3e	Kras	Pnisr
Tmem222	Ergic1	Fkbp7	Lsm3	Ppp1r9b	Krit1	Pnn
Tmem248	Ergic2	Fkrp	Lsm4	Ppp2ca	Krr1	Pnrc1
Tmem30a	Eri1	Fktn	Lsm8	Ppp2r1a	Krtcap2	Pnrc2
Tmem33	Eri2	Flcn	Lsp1	Ppp2r2a	Ktn1	Poc5
Tmem50a	Eri3	Fli1	Lss	Ppp2r3c	L3mbtl3	Pofut2
Tmem59	Erich1	Flna	Lta	Ppp2r5a	Lamc1	Poglut1
Tmem64	Erlin2	Flot2	Lta4h	Ppp2r5c	Lamp1	Pola1
Tmem68	Ermp1	Flvcr1	Ltb	Ppp2r5e	Lamp2	Polb
Tmem94	Ero1l	Flywch1	Ltn1	Ppp3cb	Lamtor1	Pold3
Tmod3	Erp29	Flywch2	Luc7l2	Ppp3cc	Lamtor3	Poldip3
Tmpo	Erp44	Fmc1	Luc7l3	Ppp4r2	Lamtor5	Pole
Tmsb4x	Errfi1	Fmnl1	Ly6a	Ppp4r3a	Lap3	Pole2
Tmub2	Esco1	Fmnl3	Ly6c1	Ppp4r3b	Laptm4a	Polg
Tmx1	Esco2	Fmo5	Ly6c2	Ppp5c	Laptm5	Polr1c
Tmx3	Esf1	Fmr1	Ly6e	Ppp6c	Larp1	Polr2a
Tnf	Espl1	Fn3krp	Ly75	Ppp6r3	Larp4	Polr2e
Tnfaip1	Esr1	Fnbp1	Lypla2	Pptc7	Larp4b	Polr2f
Tnfaip3	Esrra	Fnbp4	Lysmd3	Ppwd1	Lars	Polr2m
Tnfrsf10b	Esyt1	Fndc3a	Lysmd4	Prdm10	Lars2	Polr3f
Tnfrsf18	Esyt2	Fndc7	Lyst	Prdm15	Lasp1	Pou2f1
Tnfrsf25	Etaa1	Fnip1	M6pr	Prdm2	Lat2	Ppa1
Tnfrsf26	Etf1	Fnip2	Macf1	Prelid1	Lats1	Ppan
Tnfrsf4	Etfa	Fnta	Macroh2a1	Prelid3b	Lax1	Ppfia1
Tnfsf14	Etfdh	Fntb	Mad2l1	Prepl	Lbh	Ppfibp1
Tnik	Etnk1	Focad	Madd	Prex1	Lbr	Pphln1
Tnip1	Ets1	Fopnl	Maea	Primpol	Lcor	Ppia
Tnks2	Ets2	Fos	Mafk	Prkab1	Lcp1	Ppig
Tnpo1	Etv3	Fosl2	Magoh	Prkacb	Ldha	Ppil1
Tnpo3	Etv5	Foxj2	Magt1	Prkag1	Ldlr	Ppil4
Tnrc18	Etv6	Foxj3	Mak16	Prkar1a	Lef1	Ppip5k2
Tomm22	Evi2	Foxk1	Malsu1	Prkar2a	Lemd1	Ppm1b
Tomm70a	Evl	Foxn2	Malt1	Prkca	Lemd3	Ppp1ca
Top1	Ewsr1	Foxn3	Maml2	Prkcb	Leng8	Ppp1cb
Top2a	Exo1	Foxo1	Man1a	Prkcd	Leo1	Ppp1cc
Top2b	Exoc1	Foxo3	Man1a2	Prkce	Leprot	Ppp1r10
Tor1aip1	Exoc2	Foxp1	Man1c1	Prkch	Leprotl1	Ppp1r12a
Tor1aip2	Exoc3	Foxp4	Man2a1	Prkci	Lfng	Ppp1r12b
Tpm3	Exoc4	Fpgt	Man2b1	Prkcq	Lgals8	Ppp1r15b
Tpm4	Exoc5	Frat1	Manea	Prkd2	Lgmn	Ppp1r18
Tpp2	Exoc6	Frat2	Manf	Prkdc	Lgr4	Ppp1r2
Tpr	Exoc6b	Frg1	Map2k1	Prpf38b	Lig1	Ppp1r21
Tprgl	Exoc8	Frmd4a	Map2k4	Prpf39	Lig4	Ppp1r9b
Tpx2	Exog	Frmd6	Map3k1	Prpf40a	Limd1	Ppp2ca
Traf1	Exosc1	Frmd8	Map3k2	Prpf4b	Limd2	Ppp2cb
Traf3	Exosc2	Frrs1	Map3k3	Prpf8	Limk2	Ppp2r2a
Trappc10	Exosc3	Frs2	Map3k4	Prpsap1	Lims1	Ppp2r3a
Trib2	Exosc5	Fry	Map3k5	Prpsap2	Lin54	Ppp2r3c
Trim12c	Exosc7	Fryl	Map3k7	Prr12	Lin7c	Ppp2r5e
Trim27	Exosc8	Fsd1l	Map3k8	Prr3	Litaf	Ppp4c
Trim30a	Ext1	Fth1	Map4	Prrc1	Llgl1	Ppp4r2
Trim30d	Ext2	Ftl1	Map4k2	Prrc2a	Lman1	Ppp4r3b
Trim33	Extl3	Fto	Map4k3	Prrc2c	Lman2	Ppp5c
Trim34a	Eya2	Fubp1	Map4k4	Prrg4	Lmbrd1	Ppp6c
Trim56	Eya3	Fubp3	Map4k5	Psd4	Lmna	Ppp6r3
Trim59	Ezh2	Fundc1	Map7	Psen1	Lmnb1	Pptc7
Trip11	Ezr	Furin	Map7d1	Psen2	Lmo2	Ppwd1
Trip12	F2r	Fus	Mapk1	Psg21	Lmo4	Prc1
Trir	F2rl1	Fut11	Mapk14	Psip1	Lmo7	Prdm5
Trit1	F2rl2	Fut8	Mapk1ip1	Psma1	Lmtk2	Prdx1
Trmo	F8a	Fxn	Mapk1ip1l	Psma3	Lnpep	Prdx4
Trp53	Faah	Fxr1	Mapk8	Psma4	Lnpk	Preb
Trp53inp1	Fabp5	Fxr2	Mapk9	Psmb1	Lonp2	Prelid1
Trpm7	Fads1	Fxyd5	Mapre1	Psmb8	Lonrf1	Prelid3b
Trrap	Fads2	Fyb	Mapre2	Psmc1	Lpcat1	Prim2
Tsc22d2	Faf1	Fyco1	Marchf6	Psmc2	Lpgat1	Prkaa1
Tsen34	Faf2	Fyn	Marchf7	Psmd11	Lpin1	Prkab1
Tspan14	Faim	Fyttd1	Marf1	Psmd8	Lpin2	Prkaca
Tsr2	Fam102a	Fzr1	Mark2	Psme3	Lpxn	Prkacb
Ttc39b	Fam102b	G0s2	Mast2	Psme4	Lratd2	Prkag1
Ttll12	Fam104a	G2e3	Mast3	Pspc1	Lrba	Prkar1a
Ttll4	Fam107b	G3bp1	Mast4	Ptbp1	Lrch1	Prkar2a
Ttyh1	Fam110a	G3bp2	Mat2a	Ptbp3	Lrch3	Prkca
Ttyh3	Fam111a	G6pdx	Mat2b	Ptcd2	Lrig2	Prkci
Tubb5	Fam114a2	Gab2	Matr3	Ptcd3	Lrmp	Prkd2
Tubgcp3	Fam117b	Gabarap	Mau2	Ptch1	Lrp10	Prkd3
Tubgcp4	Fam118b	Gabarapl1	Mavs	Ptdss1	Lrp1b	Prkg1
Tut4	Fam120a	Gabarapl2	Max	Pten	Lrp6	Prpf19
Tvp23b	Fam120b	Gabbr1	Maz	Ptger4	Lrp8	Prpf38a
Twsg1	Fam120c	Gabpa	Mbd2	Ptges3	Lrrc40	Prpf4
Txk	Fam122b	Gabpb1	Mbd5	Ptgr2	Lrrc42	Prpf40a
Txndc11	Fam126a	Gabpb2	Mbip	Ptk2b	Lrrc47	Prpf8
Txnip	Fam126b	Gadd45g	Mbnl1	Ptma	Lrrc58	Prpsap1
Txnl1	Fam129a	Gak	Mboat1	Ptp4a3	Lrrc59	Prpsap2
Txnrd1	Fam133b	Galk2	Mboat7	Ptpn1	Lrrc8c	Prr11
Tyro3	Fam136a	Galnt1	Mbp	Ptpn18	Lrrc8d	Prr12
Tyw3	Fam13b	Galnt10	Mbtps1	Ptpn22	Lrrfip1	Prr3
U2surp	Fam149b	Galnt11	Mcl1	Ptpn4	Lrrk2	Prrc1
Uba1	Fam160a2	Galnt12	Mcm2	Ptpn6	Lsamp	Prrc2a
Uba2	Fam160b1	Galnt14	Mcm3	Ptpn7	Lsm1	Prrc2b
Ubac2	Fam162a	Galnt2l	Mcm3ap	Ptprc	Lsm12	Prrc2c
Ubap1	Fam168a	Galnt6	Mcm4	Ptprcap	Lsm14a	Prrx1
Ubap2	Fam168b	Galnt7	Mcm5	Ptpre	Lsm14b	Prss23
Ube2a	Fam169b	Gan	Mcm6	Ptprg	Lsm2	Psap
Ube2c	Fam172a	Ganab	Mcmbp	Pum1	Lsm3	Psat1
Ube2d3	Fam174a	Ganc	Mcoln1	Pum2	Lsm4	Psen1
Ube2g1	Fam174b	Gapdh	Mcts1	Pura	Lsm5	Psip1
Ube2g2	Fam185a	Gapvd1	Mdc1	Purb	Lsm6	Psma1
Ube2j1	Fam193a	Gar1	Mdfic	Pus10	Lsm8	Psma3
Ube2j2	Fam199x	Gars	Mdh1	Pwp1	Lsp1	Psmb1
Ube2q2	Fam20a	Gart	Mdm2	Pwwp2a	Lta	Psmc6
Ube2r2	Fam20b	Gas2	Mdm4	Pym1	Lta4h	Psmd1
Ube2t	Fam210a	Gas2l3	Me2	Qars	Ltb	Psmd11
Ube2w	Fam214a	Gata3	Med1	Qk	Ltn1	Psmd14
Ube3c	Fam219a	Gatad1	Med12	R3hcc1l	Ltv1	Psmd3
Ubn2	Fam221a	Gatad2a	Med13	R3hdm1	Luc7l	Psmd7
Ubp1	Fam222b	Gatad2b	Med13l	R3hdm4	Luc7l2	Psme3
Ubqln1	Fam234b	Gatd1	Med14	Rab10	Ly6a	Psme4
Ubr1	Fam241a	Gbe1	Med15	Rab11b	Ly6d	Pspc1
Ubr5	Fam3c	Gbf1	Med17	Rab12	Ly6e	Ptbp1
Ubtd2	Fam43a	Gbp2	Med18	Rab14	Ly75	Ptbp2
Ubxn7	Fam45a	Gbp3	Med19	Rab1a	Ly86	Ptbp3
Ugcg	Fam49a	Gbp7	Med23	Rab1b	Ly9	Ptch1
Uggt1	Fam49b	Gbp8	Med4	Rab21	Lyn	Ptdss1
Uhmk1	Fam53a	Gcc2	Med6	Rab22a	Lypla2	Pten
Uhrf1bp1	Fam53c	Gclc	Mef2a	Rab27a	Lyrm4	Ptges3
Ulbp1	Fam57a	Gclm	Mef2d	Rab35	Lysmd3	Ptgs1
Ulk1	Fam57b	Gdap2	Melk	Rab3gap1	Lysmd4	Ptgs2
Unc119b	Fam71b	Gdi1	Men1	Rab3gap2	Lyst	Ptk2
Unc5cl	Fam76a	Gdi2	Metap2	Rab5b	Lzts2	Ptk2b
Uqcrh	Fam76b	Gem	Mettl17	Rab5c	M6pr	Ptk7
Uri1	Fam78a	Gemin5	Mettl23	Rab7	Macf1	Ptma
Usf3	Fam83d	Gfi1	Mettl26	Rab8b	Macroh2a1	Ptms
Uso1	Fam8a1	Gfm1	Mettl8	Rabep1	Mad2l1	Ptn
Usp1	Fam91a1	Gfod1	Mex3b	Rabgap1	Madd	Ptov1
Usp12	Fam98a	Gfpt1	Mfap1a	Rabgap1l	Maea	Ptp4a2
Usp15	Fam98b	Gfra3	Mfhas1	Rabggtb	Mafg	Ptp4a3
Usp16	Fan1	Gga3	Mfn1	Rabl6	Mafk	Ptpn11
Usp19	Fanca	Ggact	Mfsd1	Rac1	Magoh	Ptpn12
Usp24	Fancb	Ggnbp2	Mfsd14a	Rac2	Magt1	Ptpn13
Usp25	Fancd2	Ggps1	Mfsd14b	Rack1	Mak16	Ptpn14
Usp3	Fance	Ggt5	Mfsd4b4	Rad21	Malsu1	Ptpn4
Usp34	Fancf	Ggta1	Mfsd8	Rad23b	Malt1	Ptprf
[truncated: 5,052 more rows]

## Sheet: Mouse 3UTR
CD4+	CD8	TH17	TH0	TReg	B	MEF
1110004F10Rik	0610009B22Rik	0610030E20Rik	0610030E20Rik	0610030E20Rik	0610030E20Rik	0610030E20Rik
2410004B18Rik	0610030E20Rik	1110004F10Rik	1110004F10Rik	1110004F10Rik	1110004F10Rik	1110004F10Rik
2610002M06Rik	1110004F10Rik	1110059G10Rik	1110059G10Rik	2410004B18Rik	1110059E24Rik	1810037I17Rik
4930453N24Rik	1110032F04Rik	1500011B03Rik	1810030O07Rik	2610002M06Rik	1110059G10Rik	2310022B05Rik
4930523C07Rik	1110038F14Rik	1600014C10Rik	1810037I17Rik	4930523C07Rik	1700017B05Rik	2410004B18Rik
8030462N17Rik	1110059E24Rik	1700010I14Rik	2410004B18Rik	4931428F04Rik	1810013L24Rik	2610001J05Rik
9530068E07Rik	1110059G10Rik	1700025G04Rik	2510039O18Rik	8030462N17Rik	2310022A10Rik	2700081O15Rik
AI467606	1190007I07Rik	1700123O20Rik	2610002M06Rik	9530068E07Rik	2310061I04Rik	9530068E07Rik
AI597479	1500009L16Rik	1810013L24Rik	4921524J17Rik	9930111J21Rik2	2410004B18Rik	AI597479
AI837181	1500011B03Rik	1810030O07Rik	4930453N24Rik	AI467606	2510039O18Rik	AW549877
AW549877	1600014C10Rik	1810037I17Rik	4931428F04Rik	AI597479	2610001J05Rik	Abcb7
Aak1	1700017B05Rik	2310061I04Rik	4932438A13Rik	AI837181	2610002M06Rik	Abcc1
Abcb7	1700025G04Rik	2410004B18Rik	6430571L13Rik	AW549877	2610507B11Rik	Abcd3
Abcb9	1700123O20Rik	2510039O18Rik	8030462N17Rik	Aasdhppt	4833439L19Rik	Abce1
Abce1	1810013L24Rik	2610001J05Rik	9530068E07Rik	Abcb7	4930523C07Rik	Abhd17c
Abhd6	1810030O07Rik	2610002M06Rik	9930111J21Rik2	Abcb9	4932438A13Rik	Abhd6
Abi1	1810037I17Rik	4833420G17Rik	AB124611	Abce1	5730455P16Rik	Abi2
Abi2	2310011J03Rik	4833439L19Rik	AI467606	Abcf2	5730480H06Rik	Abracl
Ablim1	2310022A10Rik	4921524J17Rik	AI597479	Abhd17b	8030462N17Rik	Acap2
Abracl	2310033P09Rik	4930430F08Rik	AI837181	Abhd6	9430038I01Rik	Acat2
Abtb2	2310061I04Rik	4930453N24Rik	AW549877	Abi1	9530068E07Rik	Acbd3
Acbd3	2410004B18Rik	4930503L19Rik	Aak1	Abi2	A630001G21Rik	Acin1
Acin1	2510009E07Rik	4930523C07Rik	Aamp	Ablim1	AB124611	Acly
Acly	2510039O18Rik	4930579G24Rik	Abcb7	Abtb2	AI413582	Acsl4
Acsl5	2610001J05Rik	4931428F04Rik	Abcb9	Acbd3	AI467606	Acta2
Actn4	2610002M06Rik	4932438A13Rik	Abcc1	Acin1	AI597479	Actb
Actr2	2610021A01Rik	4933430I17Rik	Abce1	Acly	AW549877	Actg1
Adam10	2610301B20Rik	5730480H06Rik	Abhd17b	Acsl4	Aak1	Actn1
Adam17	2610507B11Rik	6030458C11Rik	Abhd17c	Actb	Aamp	Actn4
Adam19	2700049A03Rik	6430571L13Rik	Abhd2	Actg1	Aars	Actr1a
Adamts6	2700081O15Rik	8030462N17Rik	Abhd6	Actr1a	Abcb7	Actr2
Adcy6	4833439L19Rik	9530068E07Rik	Abi1	Actr2	Abce1	Actr3
Adcy7	4921524J17Rik	9930021J03Rik	Abi2	Actr3	Abcg1	Acvr1
Add1	4930453N24Rik	9930111J21Rik2	Abl1	Adam10	Abhd13	Adam10
Add3	4930523C07Rik	A030005L19Rik	Ablim1	Adam17	Abhd17b	Adam17
Adgre5	4930579G24Rik	A630001G21Rik	Abr	Adam19	Abhd17c	Adam23
Adgrl1	4931406P16Rik	AA467197	Abracl	Adamts6	Abhd2	Adam9
Adipor1	4931428F04Rik	AB124611	Abtb2	Adcy6	Abi1	Adamts1
Ado	4932438A13Rik	AI413582	Acap2	Adcy7	Abl1	Adamts20
Aebp2	5730480H06Rik	AI467606	Acbd3	Add3	Abl2	Adamts5
Aff4	6030458C11Rik	AI597479	Acin1	Adgre5	Ablim1	Adamts6
Agap2	6430571L13Rik	AI837181	Acly	Adgrl1	Abr	Adamtsl3
Agfg1	8030462N17Rik	AU040320	Aco2	Adipor1	Abracl	Adcy6
Aggf1	9130019O22Rik	AW549877	Acp5	Adipor2	Abtb2	Adcy7
Ago1	9430038I01Rik	Aacs	Acsl4	Ado	Acadl	Add1
Ago2	9530068E07Rik	Aak1	Acsl5	Aebp2	Acap2	Adgra2
Agpat2	9930012K11Rik	Aamp	Actb	Aff1	Acat2	Adgrl1
Agps	9930021J03Rik	Aasdhppt	Actg1	Aff3	Acbd3	Adgrl2
Agtpbp1	9930111J21Rik2	Abcb7	Actn4	Aff4	Acin1	Adipor1
Ahctf1	A130010J15Rik	Abcb9	Actr1a	Aftph	Acly	Ado
Akap10	A630001G21Rik	Abcc1	Actr2	Agap2	Aco2	Adrb1
Akap13	AA467197	Abcd3	Actr3	Agfg1	Acsf2	Aebp2
Akap8	AB124611	Abce1	Actr6	Aggf1	Acsl3	Afap1
Akirin1	AI467606	Abcf1	Acvr1b	Ago1	Acsl4	Afdn
Alkbh1	AI597479	Abcf2	Adam10	Ago2	Acsl5	Aff4
Amd1	AI837181	Abcg1	Adam17	Agpat2	Acss1	Aggf1
Anapc1	AU040320	Abcg3	Adam19	Agps	Actb	Ago1
Anapc4	AW549877	Abhd10	Adamts6	Agtpbp1	Actg1	Ago2
Ankfy1	Aacs	Abhd13	Adcy6	Ahctf1	Actn4	Agpat2
Ankrd11	Aak1	Abhd17b	Adcy7	Ahcyl2	Actr1a	Agps
Ankrd13a	Aamp	Abhd17c	Add1	Ahnak	Actr2	Agrn
Ankrd13c	Aar2	Abhd18	Add3	Ahr	Actr3	Ahctf1
Ankrd37	Aasdhppt	Abhd2	Adgre5	Ak4	Actr6	Ahcyl1
Ankrd40	Abca2	Abhd4	Adgrl1	Akap10	Acvr1b	Ahdc1
Ankrd44	Abcb10	Abhd6	Adipor1	Akap11	Adam10	Ahnak
Ankrd50	Abcb1b	Abhd8	Adipor2	Akap13	Adam17	Ahr
Anp32e	Abcb7	Abi1	Adk	Akap8	Adam19	Akap10
Anxa2	Abcb9	Abi2	Adnp2	Akirin1	Adam9	Akap11
Aopep	Abcc1	Abl1	Ado	Alg5	Adamts1	Akap12
Ap1b1	Abcc5	Abl2	Adprm	Alkbh1	Adamts6	Akap13
Ap1g1	Abcd3	Ablim1	Adss	Alkbh5	Adat2	Akap8
Appbp2	Abce1	Abr	Aebp2	Alyref	Adcy7	Aldh1a1
Araf	Abcf1	Abracl	Aff1	Anapc1	Add1	Alg10b
Arcn1	Abcf2	Abraxas1	Aff3	Ankfy1	Add3	Alkbh5
Arf6	Abhd10	Abtb1	Aff4	Ankrd11	Adgre5	Alyref
Arfgap2	Abhd13	Abtb2	Afg3l2	Ankrd13c	Adi1	Amd1
Arfgap3	Abhd16a	Acads	Aftph	Ankrd37	Adipor1	Ammecr1
Arfip1	Abhd17b	Acap2	Agap2	Ankrd40	Adipor2	Amotl2
Arfrp1	Abhd17c	Acat2	Agfg1	Ankrd44	Ado	Anapc1
Arglu1	Abhd18	Acbd3	Aggf1	Ankrd50	Adprm	Anapc4
Arhgap11a	Abhd2	Acin1	Ago1	Anp32a	Aebp2	Ankfy1
Arhgap30	Abhd4	Acly	Ago2	Anp32e	Aff1	Ankrd13c
Arhgap9	Abhd6	Aco2	Agpat2	Anxa2	Aff3	Ankrd37
Arhgdib	Abi1	Acot9	Agps	Anxa5	Aff4	Ankrd40
Arhgef18	Abi2	Acp2	Agtpbp1	Aopep	Aftph	Ankrd50
Arhgef3	Abl1	Acp5	Ahctf1	Ap1b1	Agap2	Ankrd52
Arhgef6	Abl2	Acsl3	Ahcyl1	Ap1g1	Agfg1	Anln
Arid1a	Ablim1	Acsl4	Ahcyl2	Ap1s3	Aggf1	Anp32b
Arid2	Abr	Acsl5	Ahnak	Ap2b1	Ago1	Anp32e
Arid4a	Abracl	Acss1	Ak2	Ap3d1	Ago2	Antxr1
Arid4b	Abraxas1	Actb	Ak4	Apbb1ip	Agpat4	Anxa1
Arih1	Abraxas2	Actg1	Akap10	Apc	Ahctf1	Anxa2
Arl2bp	Abtb1	Actl6a	Akap11	Apobec3	Ahcyl1	Anxa5
Arl4c	Abtb2	Actn1	Akap13	Appbp2	Ahcyl2	Aopep
Arl5b	Acad9	Actn4	Akap8	Appl1	Ahdc1	Ap1ar
Arl6ip1	Acadl	Actr10	Akirin1	Aqp3	Ahnak	Ap1g1
Arl6ip5	Acadm	Actr1a	Akirin2	Arap2	Ahr	Ap2a2
Arl8b	Acads	Actr2	Akna	Arcn1	Ahsa1	Apbb2
Armc1	Acadsb	Actr3	Akt1	Arf1	Aida	Apc
Armcx4	Acap2	Actr6	Aldoa	Arf3	Aim2	Aplp2
Armt1	Acat1	Actr8	Alg10b	Arf4	Ak2	Apobec3
Arntl	Acat2	Acvr1b	Alg5	Arf5	Akap10	App
Arpc4	Acbd3	Acvrl1	Alkbh1	Arf6	Akap11	Appbp2
Arpc5	Acer3	Adal	Alkbh5	Arfgap2	Akap13	Aqr
Arpc5l	Acin1	Adam10	Als2cl	Arfgef1	Akap8	Araf
Arpp19	Acly	Adam17	Alyref	Arfip1	Akap9	Arcn1
Arrdc3	Aco2	Adam19	Amd1	Arfrp1	Akirin1	Arf1
Arsb	Acsf2	Adam9	Amfr	Arglu1	Akirin2	Arf3
Asap1	Acsl3	Adamts6	Ammecr1	Arhgap1	Akna	Arf4
Asb6	Acsl4	Adar	Anapc1	Arhgap11a	Akt1	Arf5
Asf1b	Acsl5	Adarb1	Anapc4	Arhgap15	Akt2	Arf6
Ash1l	Actb	Adcy6	Angel2	Arhgap30	Alcam	Arfgap3
Aspm	Actg1	Adcy7	Angptl4	Arhgap9	Aldh2	Arfgef1
Asxl2	Actl6a	Add1	Ankfy1	Arhgdia	Alg10b	Arfip1
Atad1	Actn4	Add3	Ankrd11	Arhgdib	Alg11	Arfrp1
Atad2	Actr10	Adgre5	Ankrd12	Arhgef1	Alkbh1	Arglu1
Atad5	Actr1a	Adgrl1	Ankrd13a	Arhgef3	Alkbh5	Arhgap21
Atf2	Actr2	Adi1	Ankrd13c	Arhgef6	Alpl	Arhgap23
Atf7ip	Actr3	Adipor1	Ankrd37	Arid1a	Alyref	Arhgap29
Atl3	Actr5	Adipor2	Ankrd40	Arid1b	Amd1	Arhgap42
Atp11b	Actr6	Adk	Ankrd44	Arid2	Amfr	Arhgap5
Atp11c	Acvr1b	Adnp2	Ankrd50	Arid4a	Amigo2	Arhgdia
Atp13a3	Acvrl1	Ado	Ankrd52	Arid4b	Anapc1	Arhgef10l
Atp1a1	Adam10	Adora2b	Anp32a	Arid5a	Anapc5	Arid1a
Atp1b3	Adam17	Adpgk	Anp32b	Arid5b	Angel2	Arid2
Atp2a2	Adam19	Adprh	Anp32e	Arih1	Ankfy1	Arid4b
Atp2b1	Adam9	Adprm	Anxa2	Arl13b	Ankib1	Arid5b
Atp2c1	Adamts6	Adsl	Anxa6	Arl2bp	Ankrd11	Arih1
Atp5a1	Adap1	Adss	Anxa7	Arl4c	Ankrd12	Arl13b
Atp5g3	Adar	Aebp2	Aopep	Arl5b	Ankrd13a	Arl5b
Atp6ap2	Adarb1	Aff1	Ap1ar	Arl6ip1	Ankrd13c	Arl6ip5
Atp6v0a2	Adat1	Aff3	Ap1b1	Arl6ip5	Ankrd17	Arl6ip6
Atp6v0e	Adcy6	Aff4	Ap1g1	Arl8a	Ankrd28	Arl8a
Atp6v1b2	Adcy7	Afg3l2	Ap1s3	Arl8b	Ankrd37	Arl8b
Atp6v1f	Add1	Aftph	Ap2a2	Armc1	Ankrd40	Armc1
Atp8b2	Add3	Agap2	Ap2b1	Armt1	Ankrd44	Armcx4
Atrx	Adgre5	Agap3	Ap2s1	Arntl	Ankrd46	Armt1
Atxn1	Adgrg5	Agfg1	Apaf1	Arpc2	Ankrd50	Arnt
Atxn2l	Adgrl1	Aggf1	Apc	Arpc4	Ankrd52	Arpc1a
Atxn7l3	Adi1	Agk	Api5	Arpc5	Anks1	Arpc4
Atxn7l3b	Adipor1	Ago1	Aplp2	Arpc5l	Anp32a	Arpc5
Aup1	Adipor2	Ago2	Apobec3	Arrdc3	Anp32b	Arpp19
Axin2	Adk	Agpat1	Appbp2	Arsb	Anp32e	Arrdc3
Azi2	Adnp2	Agpat2	Appl1	Asap1	Anxa7	Arsj
Azin1	Ado	Agpat5	Aqr	Asb6	Ap1ar	Asah1
B230219D22Rik	Adora2b	Agps	Ar	Ash1l	Ap1g1	Asap1
B2m	Adprh	Agtpbp1	Araf	Asxl2	Ap1m1	Ash1l
B3galt4	Adrb1	Agtrap	Arap2	Atad1	Ap1s1	Aspm
B4galnt4	Adsl	Ahctf1	Arcn1	Atad2b	Ap1s3	Atad1
B4galt1	Adss	Ahcyl1	Arel1	Atf2	Ap2b1	Atad2
B4galt5	Aebp2	Ahcyl2	Arf1	Atf7ip	Ap2s1	Atad5
BC005537	Aen	Ahdc1	Arf3	Atl3	Ap3b1	Atf2
Bach1	Aff1	Ahnak	Arf4	Atp11b	Apbb1ip	Atf7ip
Bach2	Aff3	Ahr	Arf5	Atp11c	Apc	Atg4c
Bard1	Aff4	Aifm1	Arf6	Atp13a3	Api5	Atl2
Baz1a	Afg3l2	Aip	Arfgap2	Atp1a1	Aplp2	Atl3
Baz2b	Aftph	Ak3	Arfgef1	Atp1b1	Apmap	Atp11b
Bcas2	Agap2	Ak4	Arfgef2	Atp1b3	Apobec1	Atp13a3
Bcl11b	Agap3	Ak6	Arfip1	Atp2a2	Apobec3	Atp1a1
Bcl2	Agfg1	Akap1	Arfrp1	Atp2a3	App	Atp1b1
Bcl2l11	Aggf1	Akap10	Arglu1	Atp2b1	Appbp2	Atp2a2
Bcl9l	Agk	Akap11	Arhgap1	Atp2c1	Appl1	Atp2b1
Bcor	Ago1	Akap12	Arhgap11a	Atp5a1	Aqp7	Atp2c1
Bcorl1	Ago2	Akap13	Arhgap15	Atp5pb	Aqr	Atp5a1
Bdp1	Agpat1	Akap8	Arhgap30	Atp6v0a2	Arap2	Atp5c1
Bhlhe40	Agpat2	Akap9	Arhgap45	Atp6v0e	Arcn1	Atp5g3
Bicd2	Agpat3	Akirin1	Arhgap9	Atp6v1b2	Arel1	Atp6ap1
Birc5	Agpat5	Akirin2	Arhgdia	Atp6v1f	Arf1	Atp6ap2
Blm	Agps	Akna	Arhgdib	Atp8b2	Arf3	Atp6v0e
Bloc1s6	Agtpbp1	Akr1a1	Arhgef1	Atrx	Arf4	Atp6v1b2
Bmi1	Agtrap	Akr1c13	Arhgef3	Atxn1	Arf5	Atp6v1g1
Bmpr1a	Ahctf1	Akr1e1	Arhgef6	Atxn2l	Arf6	Atp8b2
Bmt2	Ahcyl1	Akt1	Arid1a	Atxn7l3	Arfgap2	Atrx
Bnip2	Ahcyl2	Akt3	Arid1b	Atxn7l3b	Arfgap3	Atxn1
Bnip3l	Ahdc1	Alcam	Arid2	Aup1	Arfgef1	Atxn2l
Bptf	Ahnak	Aldoa	Arid4a	Avl9	Arfgef2	Atxn7l3
Brat1	Ahr	Aldoc	Arid4b	Axin1	Arfip1	Atxn7l3b
Brd1	Ahsa2	Alg10b	Arid5a	Axin2	Arfrp1	Avl9
Brd8	Aida	Alg11	Arid5b	Azi2	Arglu1	Axin1
Btaf1	Aifm1	Alg5	Arih1	Azin1	Arhgap1	Axl
Btbd7	Aim2	Alkbh1	Arl13b	B230219D22Rik	Arhgap11a	Azin1
Btg1	Ak2	Alkbh5	Arl14ep	B2m	Arhgap19	B230219D22Rik
Btg2	Ak3	Als2cl	Arl2bp	B3galt4	Arhgap21	B2m
Btla	Ak4	Alyref	Arl4c	B4galt1	Arhgap30	B4galt1
Bub3	Ak6	Amd1	Arl5a	B4galt5	Arhgap45	B4galt4
Bzw1	Akap1	Amd2	Arl5b	BC005537	Arhgdia	B4galt5
C1d	Akap10	Amer1	Arl6ip1	Bach2	Arhgdib	BC005537
C1galt1	Akap11	Amfr	Arl6ip5	Baz1b	Arhgef1	Bach1
C2cd2l	Akap13	Ammecr1	Arl6ip6	Baz2b	Arhgef11	Basp1
Cacna1a	Akap8	Anapc1	Arl8a	Bbc3	Arhgef12	Baz1b
Calcrl	Akap9	Anapc11	Arl8b	Bcas2	Arhgef3	Baz2b
Calhm2	Akirin1	Anapc16	Armc1	Bcl11b	Arhgef6	Bbx
Calm1	Akirin2	Anapc4	Armc8	Bcl2	Arid1a	Bcar3
Calr	Akna	Angel2	Armcx4	Bcl2l11	Arid1b	Bcas2
Camk1d	Akr1c13	Angptl4	Armt1	Bcl9l	Arid2	Bcat1
Camkk2	Akr1e1	Ank	Arntl	Bcor	Arid3a	Bcl2l11
Cand1	Akt1	Ankfy1	Arpc1a	Bcorl1	Arid3b	Bcl9l
Canx	Akt2	Ankib1	Arpc1b	Bdp1	Arid4a	Bcorl1
Capn2	Akt3	Ankle2	Arpc2	Bhlhe40	Arid4b	Bdp1
Capns1	Alcam	Ankmy2	Arpc3	Bicd2	Arid5a	Bgn
Caprin1	Aldh18a1	Ankra2	Arpc4	Blm	Arid5b	Bhlhe40
Capza2	Aldh9a1	Ankrd10	Arpc5	Bloc1s6	Arih1	Bicc1
Capzb	Aldoa	Ankrd11	Arpc5l	Bmi1	Arl1	Bicd2
Cars2	Alg10b	Ankrd12	Arpp19	Bmpr1a	Arl2bp	Birc6
Casc3	Alg11	Ankrd13a	Arrdc3	Bmpr2	Arl4c	Bloc1s6
Casd1	Alg13	Ankrd13c	Arrdc4	Bmt2	Arl5a	Bmi1
Casp2	Alg5	Ankrd17	Arsb	Bnip2	Arl5b	Bmp4
Casp8ap2	Alg6	Ankrd26	Art2b	Bnip3l	Arl6ip1	Bmper
Cbfb	Alkbh1	Ankrd28	Asap1	Bptf	Arl6ip5	Bmpr1a
Cbl	Alkbh5	Ankrd37	Asb6	Braf	Arl6ip6	Bmpr2
Cblb	Alkbh8	Ankrd40	Asf1b	Brat1	Arl8a	Bmt2
Cbx1	Als2cl	Ankrd44	Ash1l	Brd1	Arl8b	Bnip2
Cbx3	Alyref	Ankrd46	Aspm	Brd2	Armc1	Bnip3l
Cbx4	Ambra1	Ankrd50	Asxl1	Brd8	Armc8	Bptf
Cbx5	Amd1	Ankrd52	Asxl2	Brpf1	Armt1	Brd1
Ccar1	Amd2	Anks1	Atad1	Brwd1	Arpc1a	Brd2
Ccdc117	Amfr	Anln	Atad2	Brwd3	Arpc2	Brd3
Ccdc127	Ammecr1	Anp32a	Atad2b	Bsdc1	Arpc3	Brd4
Ccdc25	Ammecr1l	Anp32b	Atad5	Btaf1	Arpc4	Brd8
Ccdc34	Ampd2	Anp32e	Atf1	Btbd7	Arpc5	Brix1
Ccdc93	Anapc1	Anxa2	Atf2	Btg1	Arpc5l	Brpf1
Ccl4	Anapc11	Anxa5	Atf7ip	Btg2	Arpp19	Brwd1
Ccna2	Anapc16	Anxa6	Atl3	Btla	Arrdc3	Bsg
Ccnb1	Anapc4	Anxa7	Atp11b	Bub3	Asah1	Btaf1
Ccnc	Anapc5	Aopep	Atp11c	Bzw1	Asap1	Btbd7
Ccnd2	Angel1	Ap1ar	Atp13a3	C1d	Asb7	Btg1
Ccnd3	Angel2	Ap1b1	Atp1a1	C1galt1	Asf1b	Btg3
Ccndbp1	Angptl4	Ap1g1	Atp1b3	C2cd2l	Ash1l	Bves
Ccne2	Ankfy1	Ap1m1	Atp2a2	Cab39	Asxl1	Bzw1
Ccnf	Ankib1	Ap1s1	Atp2a3	Cacna1a	Atad1	C1d
Ccng2	Ankle1	Ap1s3	Atp2b1	Calcrl	Atad2	C1galt1c1
Ccnk	Ankle2	Ap2a2	Atp2c1	Calhm2	Atad2b	C1qbp
Ccnl2	Ankmy2	Ap2b1	Atp5a1	Calm1	Atad5	C2cd2l
Ccnq	Ankra2	Ap3d1	Atp5b	Calm2	Atf1	Cab39
Ccnt1	Ankrd10	Ap3m1	Atp5c1	Calm3	Atf2	Cables1
Ccnt2	Ankrd11	Ap3s1	Atp5e	Calr	Atf5	Cacna1a
Ccr2	Ankrd12	Ap3s2	Atp5g3	Camk1d	Atf6	Cald1
Ccr7	Ankrd13a	Ap4e1	Atp5md	Camk2d	Atf6b	Calhm2
Cct2	Ankrd13b	Ap5m1	Atp5pb	Camkk2	Atf7ip	Calm1
Cd164	Ankrd13c	Apaf1	Atp6ap1	Canx	Atg12	Calm2
Cd2	Ankrd17	Apbb1ip	Atp6ap2	Cap1	Atl2	Calm3
Cd226	Ankrd26	Apc	Atp6v0a2	Capn1	Atl3	Calr
Cd247	Ankrd28	Api5	Atp6v0e	Capn2	Atm	Calu
Cd27	Ankrd37	Aplf	Atp6v1b2	Caprin1	Atmin	Camk2d
Cd28	Ankrd40	Aplp2	Atp6v1f	Capza2	Atp11b	Camkk2
Cd3d	Ankrd44	Apobec3	Atp6v1g1	Capzb	Atp13a3	Camsap2
Cd4	Ankrd46	App	Atp6v1h	Casc3	Atp1a1	Canx
Cd47	Ankrd50	Appbp2	Atp8b2	Casd1	Atp1b3	Capn2
Cd53	Ankrd52	Appl1	Atrx	Casp6	Atp2a2	Caprin1
Cd84	Ankrd54	Appl2	Atxn1	Casp7	Atp2a3	Capza2
Cdc25a	Anks1	Aqp3	Atxn2l	Casp8ap2	Atp2b1	Capzb
Cdc25b	Anln	Aqr	Atxn7l3	Cbfb	Atp2c1	Card19
Cdc27	Ano6	Ar	Atxn7l3b	Cbl	Atp5a1	Cars
Cdc37l1	Anp32a	Araf	Auh	Cblb	Atp5b	Casc4
Cdc40	Anp32b	Arap2	Aup1	Cbx1	Atp5c1	Casd1
Cdc42	Anp32e	Arcn1	Aurkb	Cbx3	Atp5e	Casp2
Cdc42se1	Antxr2	Arel1	Avl9	Cbx4	Atp5pb	Casp8ap2
Cdc42se2	Anxa2	Arf1	Axin1	Ccar1	Atp6ap1	Cav1
Cdc7	Anxa5	Arf3	Axin2	Ccdc117	Atp6ap2	Cavin1
Cdc73	Anxa6	Arf4	Azi2	Ccdc127	Atp6v0b	Cbfb
Cdca4	Anxa7	Arf5	Azin1	Ccdc50	Atp6v0d1	Cbx1
Cdipt	Aopep	Arf6	B230219D22Rik	Ccdc71l	Atp6v0e	Cbx3
Cdk13	Ap1ar	Arfgap2	B2m	Ccdc93	Atp6v1a	Cbx5
Cdk17	Ap1b1	Arfgap3	B3galt4	Ccl4	Atp6v1b2	Ccar1
Cdk6	Ap1g1	Arfgef1	B4galnt1	Ccna2	Atp6v1c1	Ccdc115
Cdkn1a	Ap1s1	Arfgef2	B4galt1	Ccnb1	Atp6v1d	Ccdc117
Cdkn1b	Ap1s2	Arfip1	B4galt5	Ccnc	Atp6v1e1	Ccdc122
Cdkn2d	Ap1s3	Arfrp1	BC005537	Ccnd2	Atp6v1f	Ccdc127
Cdon	Ap2a2	Arglu1	Bach1	Ccndbp1	Atp6v1g1	Ccdc186
Cds2	Ap2b1	Arhgap1	Bach2	Ccng2	Atp8b2	Ccdc34
Cebpg	Ap2s1	Arhgap11a	Bag5	Ccnk	Atpaf2	Ccdc50
Celf1	Ap3b1	Arhgap12	Bard1	Ccnl2	Atrx	Ccdc6
Celf2	Ap3d1	Arhgap15	Bax	Ccnq	Atxn1	Ccl7
Cenpa	Ap3m1	Arhgap18	Baz1a	Ccnt1	Atxn1l	Ccn1
Cenpe	Ap3s1	Arhgap19	Baz1b	Ccnt2	Atxn2l	Ccn2
Cenpx	Ap3s2	Arhgap21	Baz2a	Ccny	Atxn7l1	Ccn4
Cep192	Ap4e1	Arhgap26	Baz2b	Ccr2	Atxn7l3	Ccna2
Cers2	Ap5m1	Arhgap29	Bbc3	Ccr4	Atxn7l3b	Ccnb1
Cflar	Apaf1	Arhgap30	Bbx	Ccr7	Aup1	Ccnd2
Cggbp1	Apbb1ip	Arhgap35	Bcap31	Ccser2	Aurkb	Ccng2
Cgrrf1	Apc	Arhgap45	Bcas2	Cd164	Avl9	Ccnk
Chaf1a	Apex1	Arhgap5	Bcl10	Cd226	Axin1	Ccnl2
Chd1	Apex2	Arhgap9	Bcl11b	Cd247	Azi2	Ccnq
Chd1l	Api5	Arhgdia	Bcl2	Cd274	Azin1	Ccnt1
Chek1	Aplf	Arhgdib	Bcl2l1	Cd28	B230219D22Rik	Ccnt2
Chmp2b	Aplp2	Arhgef1	Bcl2l11	Cd3d	B2m	Cd164
Chsy1	Apobec3	Arhgef11	Bcl3	Cd3e	B3gnt5	Cd24a
Cic	Appbp2	Arhgef12	Bcl9l	Cd4	B4galt1	Cd44
Cinp	Appl1	Arhgef18	Bclaf1	Cd40lg	B4galt5	Cd47
Cish	Appl2	Arhgef2	Bcor	Cd47	BC005537	Cd81
Ckap2l	Aprt	Arhgef3	Bcorl1	Cd53	BC055324	Cd9
Clcn3	Aqp3	Arhgef6	Bdp1	Cd84	Babam1	Cdc27
Clec2d	Aqp9	Arid1a	Bhlhe40	Cdc25b	Bach1	Cdc37l1
Clec2i	Aqr	Arid1b	Bicd2	Cdc27	Bach2	Cdc40
Clint1	Araf	Arid2	Bicdl1	Cdc40	Bag4	Cdc42
Clk1	Arap2	Arid3a	Bicra	Cdc42	Bahd1	Cdc42bpa
Clk2	Arcn1	Arid4a	Bicral	Cdc42se1	Bak1	Cdc42bpb
Clk4	Arel1	Arid4b	Bin2	Cdc42se2	Bank1	Cdc7
Clspn	Arf1	Arid5a	Birc2	Cdc7	Bap1	Cdc73
Clta	Arf3	Arid5b	Birc3	Cdc73	Bard1	Cdca4
Cltc	Arf4	Arih1	Birc6	Cdca4	Basp1	Cdh11
Cluh	Arf5	Arih2	Blm	Cdip1	Baz1a	Cdh3
Cmtm6	Arf6	Arl13b	Bloc1s6	Cdipt	Baz1b	Cdk1
Cnbp	Arfgap1	Arl14ep	Bmi1	Cdk12	Baz2a	Cdk12
Cnn2	Arfgap2	Arl15	Bmp2k	Cdk13	Baz2b	Cdk16
Cnnm3	Arfgap3	Arl2bp	Bmpr1a	Cdk17	Bbc3	Cdk17
Cnot1	Arfgef1	Arl4c	Bmpr2	Cdk6	Bbx	Cdk2
Cnot2	Arfgef2	Arl5a	Bmt2	Cdkn1b	Bcap31	Cdk6
Cnot3	Arfgef3	Arl5b	Bnip2	Cdon	Bcar3	Cdkn1b
Cnot6	Arfip1	Arl6ip1	Bnip3	Cds2	Bcas2	Cdkn2a
Cnot6l	Arfrp1	Arl6ip5	Bnip3l	Cebpg	Bcat1	Cdon
Cnot7	Arglu1	Arl6ip6	Bod1l	Celf1	Bcl10	Cdv3
Cnot9	Arhgap1	Arl8a	Bora	Celf2	Bcl11a	Cebpb
Coa5	Arhgap11a	Arl8b	Bptf	Cenpa	Bcl2	Cebpg
Cog2	Arhgap12	Armc1	Braf	Cep350	Bcl2l1	Celf1
Cog3	Arhgap15	Armc10	Brap	Cep97	Bcl2l11	Celf2
Col4a3bp	Arhgap18	Armc7	Brat1	Cers2	Bcl3	Cemip
Commd2	Arhgap19	Armc8	Brd1	Cfl1	Bcl6	Cemip2
Commd4	Arhgap21	Armcx1	Brd2	Cfl2	Bcl7a	Cenpa
Copa	Arhgap26	Armcx4	Brd3	Cflar	Bcl9	Cenpc1
Coro1c	Arhgap30	Armt1	Brd4	Cggbp1	Bcl9l	Cenpe
Cox11	Arhgap35	Arnt	Brd7	Cgrrf1	Bclaf1	Cers2
Cpne3	Arhgap45	Arntl	Brd8	Chd1	Bcor	Cfl1
Cpsf2	Arhgap5	Arpc1a	Brix1	Cherp	Bdp1	Cfl2
Cpsf6	Arhgap9	Arpc1b	Brpf1	Chmp4b	Becn1	Cflar
Cpsf7	Arhgdia	Arpc2	Brwd1	Chordc1	Bhlha15	Cggbp1
Creb1	Arhgdib	Arpc3	Bsg	Chtop	Bhlhe40	Cgrrf1
Crebbp	Arhgef1	Arpc4	Btaf1	Cic	Bhlhe41	Chac1
Crebrf	Arhgef12	Arpc5	Btbd1	Cish	Bicd2	Chaf1a
Crebzf	Arhgef18	Arpc5l	Btbd7	Cks2	Bicdl1	Chd1
Crim1	Arhgef2	Arpp19	Btg1	Clcn3	Bicra	Chd1l
Crip1	Arhgef3	Arrb1	Btg2	Clec2d	Bicral	Cherp
Crlf3	Arhgef6	Arrb2	Btla	Clec2i	Bin1	Chmp5
Cs	Arid1a	Arrdc1	Bub3	Clint1	Bin2	Chp1
Cse1l	Arid1b	Arrdc3	Bzw1	Clip1	Birc2	Chst14
Csk	Arid2	Arrdc4	C1d	Clk1	Birc3	Chsy1
Csnk1d	Arid3a	Arsb	C1galt1	Clk2	Birc5	Cited2
Csnk1g1	Arid3b	Art2b	C1galt1c1	Clk4	Birc6	Ckap4
Csnk2a1	Arid4a	Asah1	C2cd2l	Clpx	Blcap	Ckap5
Cstf3	Arid4b	Asap1	C330007P06Rik	Clta	Blmh	Cks2
Ctbp1	Arid5a	Asap2	Caap1	Cltc	Blnk	Clcn3
Ctcf	Arid5b	Asb1	Cab39	Cluh	Bloc1s6	Clic4
Ctdsp2	Arih1	Asb13	Cables2	Cmtm6	Bmf	Clk1
Ctdspl2	Arih2	Asb6	Cacna1a	Cnnm3	Bmi1	Clk2
Ctla4	Arl1	Asb7	Cacybp	Cnot1	Bmp2k	Clk4
Ctnnb1	Arl13b	Asf1b	Calcrl	Cnot11	Bmpr1a	Clspn
Ctps	Arl14ep	Ash1l	Calhm2	Cnot2	Bmt2	Clstn1
Ctsc	Arl15	Aspm	Calm1	Cnot3	Bnip2	Cltc
Cul2	Arl2bp	Asxl1	Calm2	Cnot6	Bnip3l	Cmtm4
Cul5	Arl4c	Asxl2	Calm3	Cnot6l	Bod1l	Cnbp
Cxcr4	Arl4d	Atad1	Calr	Cnot7	Borcs7	Cnih1
Cyb561a3	Arl5a	Atad2	Camk1d	Cnp	Bptf	Cnn3
Cyb5a	Arl5b	Atad2b	Camk2d	Coa5	Braf	Cnnm3
Cyb5b	Arl6ip1	Atad5	Camkk2	Cog2	Brca1	Cnot2
Cybc1	Arl6ip5	Atf1	Camta2	Cog3	Brd1	Cnot3
Cyc1	Arl6ip6	Atf2	Cant1	Col4a3bp	Brd2	Cnot6
Cyfip2	Arl8a	Atf6	Canx	Commd4	Brd4	Cnot6l
Cyth1	Arl8b	Atf7ip	Cap1	Copa	Brd8	Cnot7
Cytip	Armc1	Atg12	Capn1	Cops2	Brix1	Cnot8
D030056L22Rik	Armc10	Atg13	Capn2	Coq10b	Brk1	Cnot9
D10Wsu102e	Armc7	Atg14	Capns1	Coro1c	Brox	Cobll1
D16Ertd472e	Armc8	Atg16l1	Caprin1	Coro7	Brpf1	Cog2
Dbi	Armcx1	Atg16l2	Capza1	Cotl1	Bsdc1	Cog3
Dbr1	Armcx4	Atg2a	Capza2	Cox11	Bsg	Col12a1
Dcaf12	Armt1	Atg2b	Capzb	Cpne3	Btaf1	Col1a1
Dck	Arntl	Atg3	Cars2	Cpox	Btbd7	Col1a2
Dclre1b	Arpc1a	Atg4c	Casc3	Cpsf2	Btbd9	Col3a1
Dcp1a	Arpc1b	Atg9a	Casd1	Cpsf6	Btf3	Col4a1
Dcp2	Arpc2	Atic	Casp2	Cpsf7	Btg1	Col4a5
Dcun1d1	Arpc3	Atl2	Casp3	Crbn	Btg2	Col5a1
Dcun1d3	Arpc4	Atl3	Casp6	Creb1	Btk	Col5a2
Dcun1d5	Arpc5	Atmin	Casp8ap2	Crebbp	Btla	Col6a2
Ddit4	Arpc5l	Atp10a	Cast	Crebrf	Bub1b	Col8a1
Ddr1	Arpp19	Atp11a	Cbfb	Crebzf	Bub3	Commd4
Ddx23	Arrb1	Atp11b	Cbl	Crim1	Bzw1	Copa
Ddx27	Arrb2	Atp11c	Cblb	Cse1l	Bzw2	Cops2
Ddx3x	Arrdc1	Atp13a3	Cbx1	Csnk1a1	C130026I21Rik	Cops5
Ddx5	Arrdc3	Atp1a1	Cbx3	Csnk1d	C1d	Coro1c
Ddx52	Arrdc4	Atp1b1	Cbx4	Csnk2a1	C1galt1	Cox11
Ddx6	Arsb	Atp1b3	Cbx5	Cstf3	C1qbp	Cpd
Degs1	Asah1	Atp2a2	Ccar1	Ctcf	C2cd2l	Cpe
Dek	Asap1	Atp2a3	Ccdc115	Ctdsp2	C2cd3	Cpne3
Dennd1b	Asap2	Atp2b1	Ccdc117	Ctdspl2	C2cd5	Cpox
Dennd4b	Asb1	Atp2b4	Ccdc12	Ctla4	C330007P06Rik	Cpsf2
Dennd5a	Asb13	Atp2c1	Ccdc127	Ctnnb1	C9orf72	Cpsf6
Depdc1b	Asb3	Atp5a1	Ccdc25	Ctps	Cab39	Cpsf7
Desi2	Asb6	Atp5b	Ccdc34	Ctsc	Cab39l	Crb2
Dgat1	Asb7	Atp5c1	Ccdc50	Cul2	Cacna1a	Creb1
Dhx15	Ascc3	Atp5e	Ccdc6	Cul5	Cacul1	Creb3l1
Dhx9	Asf1a	Atp5g3	Ccdc71l	Cyb561a3	Cacybp	Creb3l2
Dido1	Asf1b	Atp5md	Ccdc82	Cyb5a	Cad	Crebbp
Dipk2a	Ash1l	Atp5mpl	Ccdc93	Cyb5b	Calcoco1	Crebzf
Dkc1	Asna1	Atp5pb	Ccl4	Cybc1	Calcrl	Crim1
Dld	Aspm	Atp6ap1	Ccna2	Cyc1	Calhm2	Cs
Dlg1	Asxl1	Atp6ap2	Ccnb1	Cyld	Calm1	Csde1
Dnaja2	Asxl2	Atp6v0a2	Ccnb2	Cyth1	Calm2	Cse1l
Dnajb1	Atad1	Atp6v0b	Ccnc	Cyth2	Calm3	Csf1
Dnajb9	Atad2	Atp6v0d1	Ccnd2	Cyth3	Calr	Csnk1a1
Dnajc3	Atad2b	Atp6v0e	Ccnd3	Cytip	Calu	Csnk1d
Dnajc9	Atad3a	Atp6v1a	Ccndbp1	D030056L22Rik	Camk2d	Csnk1e
Dnmt1	Atad5	Atp6v1b2	Ccne2	D10Wsu102e	Camkk2	Csnk2a1
Dock11	Atf1	Atp6v1c1	Ccnf	D16Ertd472e	Camta2	Csrnp2
Dpy19l1	Atf2	Atp6v1d	Ccng1	Dbr1	Cant1	Cstf3
Dpy19l4	Atf6	Atp6v1e1	Ccng2	Dcaf12	Canx	Ctcf
Dpysl2	Atf6b	Atp6v1f	Ccni	Dck	Cap1	Ctdsp1
Drap1	Atf7ip	Atp6v1g1	Ccnj	Dcp2	Capn1	Ctdsp2
Dtx3l	Atg12	Atp6v1h	Ccnk	Dcun1d1	Capns1	Ctdspl2
Dusp2	Atg13	Atp8a2	Ccnl1	Dcun1d5	Caprin1	Ctnnb1
Dusp5	Atg16l1	Atp8b2	Ccnl2	Ddit4	Capza1	Ctnnd1
Dusp6	Atg16l2	Atp9b	Ccnq	Ddr1	Capza2	Ctps
Dvl2	Atg2a	Atpaf2	Ccnt1	Ddx17	Capzb	Ctsl
Dyrk1a	Atg2b	Atpif1	Ccnt2	Ddx23	Carmil1	Cttn
Dyrk2	Atg5	Atrn	Ccny	Ddx27	Cars2	Cul1
E2f2	Atg9a	Atrx	Ccr2	Ddx3x	Casc3	Cul2
Ect2	Atic	Atxn1	Ccr4	Ddx3y	Casd1	Cul4a
Edc3	Atl2	Atxn10	Ccr5	Ddx46	Casp2	Cul5
Edem1	Atl3	Atxn1l	Ccr7	Ddx5	Casp3	Cux1
Edem3	Atm	Atxn2	Ccser2	Ddx52	Casp4	Cwc27
Eef1b2	Atmin	Atxn2l	Cct2	Ddx6	Casp6	Cxadr
Eefsec	Atp10a	Atxn3	Cd164	Dek	Casp8ap2	Cxcl1
Efcab14	Atp11b	Atxn7l1	Cd2	Dennd1b	Casp9	Cxcl10
Efna4	Atp11c	Atxn7l3	Cd226	Dennd4b	Cast	Cxcl12
Efr3a	Atp13a3	Atxn7l3b	Cd247	Dennd5a	Cbfa2t3	Cxcl5
Egr1	Atp1a1	Auh	Cd24a	Derl2	Cbfb	Cyb561a3
Ehmt1	Atp1b3	Aup1	Cd27	Dgat1	Cbl	Cyb5b
Eif2a	Atp2a2	Aurka	Cd274	Dgka	Cblb	Cyb5r3
Eif2ak3	Atp2a3	Aurkb	Cd28	Dgkd	Cbx1	Cyc1
Eif2s3y	Atp2b1	Avl9	Cd37	Dhcr7	Cbx3	Cyp51
Eif3b	Atp2b4	Axin1	Cd3d	Dhx15	Cbx4	Cystm1
Eif4a1	Atp2c1	Axin2	Cd3e	Dhx9	Cbx5	Cyth3
Eif4b	Atp5a1	Azi2	Cd3g	Dipk2a	Ccar1	D030056L22Rik
Eif4e2	Atp5b	Azin1	Cd4	Dkc1	Ccar2	D10Wsu102e
Eif4ebp2	Atp5c1	B230219D22Rik	Cd40lg	Dlg1	Ccdc115	D230025D16Rik
Eif4h	Atp5e	B2m	Cd44	Dnah8	Ccdc117	D5Ertd579e
Eif5	Atp5g3	B3galt4	Cd47	Dnaja1	Ccdc12	Dab2
Eif5a2	Atp5k	B3galt6	Cd5	Dnaja2	Ccdc186	Dab2ip
Eif5b	Atp5md	B4galnt4	Cd52	Dnajb1	Ccdc25	Dag1
Elf1	Atp5mpl	B4galt1	Cd53	Dnajb9	Ccdc32	Daglb
Elf2	Atp5pb	B4galt4	Cd80	Dnajc10	Ccdc50	Dapk1
Elf4	Atp6ap1	B4galt5	Cd81	Dnajc16	Ccdc6	Dazap1
Elk4	Atp6ap2	BC003965	Cd82	Dnajc3	Ccdc71l	Dbi
Elmsan1	Atp6v0a2	BC005537	Cd84	Dnajc5	Ccdc82	Dcaf12
Elovl5	Atp6v0b	BC029722	Cdc14a	Dnajc9	Ccdc88c	Dcbld2
Emb	Atp6v0e	BC031181	Cdc20	Dock10	Ccl2	Dck
Emd	Atp6v1a	BC052040	Cdc25a	Dock2	Ccl22	Dcp2
Emsy	Atp6v1b2	BC055324	Cdc25b	Dock8	Ccl4	Dcun1d1
Enc1	Atp6v1c1	Babam1	Cdc27	Dpy19l4	Ccn1	Dcun1d3
Entpd5	Atp6v1e1	Bach1	Cdc37l1	Dpysl2	Ccna2	Dcun1d5
Entpd7	Atp6v1f	Bach2	Cdc40	Dr1	Ccnb1	Ddb1
Epc1	Atp6v1g1	Bad	Cdc42	Drap1	Ccnb2	Ddit4
Eps15	Atp6v1h	Bag4	Cdc42se1	Dusp10	Ccnd2	Ddit4l
Erap1	Atp8b2	Bag5	Cdc42se2	Dusp11	Ccne2	Ddost
Erg28	Atp8b4	Bahd1	Cdc6	Dusp2	Ccng2	Ddr1
Eri1	Atp9b	Bap1	Cdc7	Dusp5	Ccni	Ddr2
Ermp1	Atpaf2	Bard1	Cdc73	Dusp6	Ccnk	Ddx17
Errfi1	Atpif1	Bax	Cdca4	Dusp7	Ccnl1	Ddx21
Esco1	Atrn	Baz1a	Cdipt	Dvl2	Ccnl2	Ddx23
Esco2	Atrx	Baz1b	Cdk1	Dvl3	Ccnt1	Ddx27
Espl1	Atxn1	Baz2a	Cdk11b	Dyrk1a	Ccnt2	Ddx3x
Esyt1	Atxn1l	Baz2b	Cdk12	Dyrk2	Ccny	Ddx5
Esyt2	Atxn2l	Bbc3	Cdk13	E130309D02Rik	Ccr4	Ddx52
Etaa1	Atxn3	Bbip1	Cdk17	Ect2	Ccr5	Ddx6
Etf1	Atxn7l1	Bbs9	Cdk2	Edem3	Ccr6	Degs1
Etnk1	Atxn7l3	Bbx	Cdk2ap2	Eed	Ccr7	Dek
Ets1	Atxn7l3b	Bcap31	Cdk4	Eef1a1	Ccser2	Denn2b
Etv3	Aunip	Bcas2	Cdk5	Eef2	Cct4	Dennd5a
Exo1	Aup1	Bccip	Cdk6	Eefsec	Cct8	Derl2
Exoc4	Aurka	Bcl10	Cdkn1a	Efcab14	Cd164	Desi2
Exosc9	Aurkb	Bcl11b	Cdkn1b	Efr3a	Cd180	Dgkd
F2r	Avl9	Bcl2	Cdkn2aipnl	Egr1	Cd19	Dhx15
Fam102a	Axin1	Bcl2l1	Cdkn2c	Ehmt1	Cd22	Dip2b
Fam104a	Axin2	Bcl2l11	Cdkn2d	Eif1b	Cd24a	Dipk2a
Fam107b	Azi2	Bcl3	Cdon	Eif2a	Cd274	Dis3
Fam120a	Azin1	Bcl6	Cds2	Eif2ak3	Cd2bp2	Dkc1
Fam126a	B230219D22Rik	Bcl9l	Cdv3	Eif2s3y	Cd300lf	Dlc1
Fam126b	B2m	Bclaf1	Cebpb	Eif3b	Cd36	Dlg1
Fam133b	B3galnt2	Bcor	Cebpg	Eif4a1	Cd37	Dlg4
Fam160b1	B3galt4	Bcorl1	Celf1	Eif4a2	Cd38	Dlx2
Fam168b	B3galt6	Bdp1	Celf2	Eif4b	Cd3e	Dmxl1
Fam169b	B3gat3	Becn1	Cenpa	Eif4e2	Cd44	Dnajb1
Fam193a	B3gnt3	Bfar	Cenpe	Eif4ebp2	Cd47	Dnajb14
Fam210a	B4galnt1	Bhlhe40	Cenpi	Eif4enif1	Cd48	Dnajc3
Fam219a	B4galnt4	Bicd2	Cenpq	Eif4g1	Cd52	Dnajc5
Fam222b	B4galt1	Bicdl1	Cep170	Eif4g2	Cd69	Dnajc9
Fam49a	B4galt4	Bicra	Cep192	Eif4h	Cd74	Dnmt1
Fam49b	B4galt5	Bicral	Cep350	Eif5	Cd79a	Dnmt3a
Fam76a	BC003965	Bin1	Cep55	Eif5a	Cd79b	Dock5
Fam76b	BC005537	Bin2	Cep97	Eif5a2	Cd81	Dpy19l1
Fam78a	BC029722	Birc2	Cept1	Elavl1	Cd82	Dpy19l4
Fam8a1	BC031181	Birc3	Cers2	Elf1	Cd83	Dpysl2
Fam91a1	BC055324	Birc5	Cers5	Elf2	Cd84	Drap1
Farsa	Babam1	Birc6	Cfl1	Elf4	Cd8a	Dse
Fastkd3	Bach1	Blm	Cfl2	Elk4	Cd93	Dstn
Fbxl3	Bach2	Blmh	Cflar	Elmo1	Cdc123	Dstyk
Fbxl5	Bad	Bloc1s4	Cggbp1	Elmsan1	Cdc14a	Dtx3
Fbxo11	Bag2	Bloc1s6	Cgrrf1	Elovl5	Cdc25a	Dusp1
Fbxo3	Bag4	Bmi1	Chac2	Emb	Cdc25b	Dusp11
Fbxo33	Bag5	Bmp2k	Chaf1a	Emd	Cdc27	Dusp5
Fbxo45	Bahd1	Bmpr1a	Chd1	Emsy	Cdc40	Dusp6
Fbxw11	Bak1	Bmpr2	Chd2	Enc1	Cdc42	Dusp7
Fbxw2	Banf1	Bmt2	Chd3	Entpd5	Cdc42se1	Dut
Fbxw7	Bap1	Bnip2	Chd7	Ep300	Cdc42se2	Dvl2
Fchsd2	Bard1	Bnip3	Chek2	Epc1	Cdc45	Dvl3
Fem1c	Batf3	Bnip3l	Cherp	Eps15l1	Cdc7	Dync1i2
Fgf13	Bax	Bod1l	Chic2	Epsti1	Cdc73	Dynll1
Fgfr1op	Baz1a	Bora	Chmp3	Erap1	Cdca3	Dynll2
Fgfr1op2	Baz1b	Borcs7	Chmp4b	Erbin	Cdca4	Dynlrb1
Fis1	Baz2a	Bptf	Chmp5	Erg28	Cdca7	Dyrk1a
Fkbp1a	Baz2b	Braf	Chordc1	Ermp1	Cdh17	Dzip3
Fkbp5	Bbc3	Brap	Chp1	Esco1	Cdipt	E2f7
Flcn	Bbip1	Brat1	Chsy1	Esrra	Cdk1	Ece1
Fli1	Bbs5	Brca1	Chtop	Esyt1	Cdk12	Ect2
Flna	Bbx	Brcc3	Ciao2a	Esyt2	Cdk13	Edem1
Fmr1	Bcap29	Brd1	Cic	Etaa1	Cdk17	Edem3
Fnip1	Bcap31	Brd2	Cinp	Etf1	Cdk19	Edn1
Fos	Bcas2	Brd3	Cip2a	Etnk1	Cdk2	Eea1
Foxj2	Bcat1	Brd4	Cisd2	Ets1	Cdk2ap1	Eef1a1
Foxo1	Bccip	Brd7	Cish	Etv3	Cdk4	Eef2
Foxp1	Bcl10	Brd8	Cited2	Ewsr1	Cdk5r1	Efcab14
Frat1	Bcl11b	Bri3bp	Ckap2l	Ext1	Cdk6	Efemp1
Frat2	Bcl2	Brip1	Ckap5	Fam102a	Cdk7	Efna3
Frmd6	Bcl2l1	Brix1	Cks2	Fam104a	Cdkal1	Efna4
Frmd8	Bcl2l11	Brk1	Clasp2	Fam107b	Cdkn1a	Efna5
Fry	Bcl3	Brms1l	Clcn3	Fam120a	Cdkn1b	Efnb2
Fubp1	Bcl7a	Brox	Clec2d	Fam120c	Cdkn2a	Efr3a
Fundc1	Bcl9	Brpf1	Clec2i	Fam126a	Cdkn2aipnl	Egr1
Furin	Bcl9l	Brwd1	Clic1	Fam126b	Cdkn2d	Eif1
Fxn	Bclaf1	Brwd3	Clic4	Fam133b	Cdon	Eif2ak3
Fxr1	Bclaf3	Bsdc1	Clint1	Fam160b1	Cds2	Eif2ak4
Fyn	Bcor	Bsg	Clk1	Fam168b	Cdv3	Eif2s2
G2e3	Bcorl1	Btaf1	Clk2	Fam169b	Ceacam1	Eif3a
G3bp1	Bcr	Btbd1	Clk4	Fam193a	Cebpb	Eif4a1
G3bp2	Bdh1	Btbd7	Cln6	Fam210a	Cebpg	Eif4a2
Gabarap	Bdp1	Btg1	Clpx	Fam219a	Cecr2	Eif4b
Gabarapl1	Becn1	Btg2	Clspn	Fam49a	Celf1	Eif4ebp1
Gabpa	Bend3	Btla	Clta	Fam49b	Celf2	Eif4ebp2
Gabpb2	Bend4	Bub1b	Cltc	Fam76a	Cemip2	Eif4enif1
Gak	Bex3	Bub3	Cluh	Fam76b	Cenpa	Eif4g1
Galnt11	Bfar	Bzw1	Cmpk1	Fam8a1	Cenpc1	Eif4g2
Galnt7	Bhlhe40	C1d	Cmtm6	Fam91a1	Cenpf	Eif4h
Gart	Bicd1	C1galt1	Cnbp	Farsa	Cenpi	Eif5a
Gata3	Bicd2	C1galt1c1	Cnep1r1	Fastkd3	Cenpq	Eif5a2
Gatad2b	Bicdl1	C1qbp	Cnih1	Fbrs	Cenpx	Eif5b
Gbp2	Bicra	C2cd2l	Cnn2	Fbxl3	Cep120	Elavl1
Gem	Bicral	C2cd3	Cnnm3	Fbxl5	Cep170b	Elf1
Gga3	Bid	C2cd5	Cnot1	Fbxo11	Cep350	Elf2
Ghitm	Birc2	C330007P06Rik	Cnot11	Fbxo33	Cep55	Elmsan1
Gid4	Birc3	Caap1	Cnot2	Fbxo38	Cep57	Eloa
Gid8	Birc5	Cab39	Cnot3	Fbxo45	Cep68	Elovl5
Gigyf2	Birc6	Cab39l	Cnot6	Fbxw11	Cep76	Elp3
Gimap3	Bivm	Cabin1	Cnot6l	Fbxw7	Cep85l	Emd
Gimap4	Blcap	Cables1	Cnot7	Fchsd2	Cerk	Emp1
Gimap6	Blm	Cables2	Cnot9	Fem1c	Cers2	Emsy
Gimap9	Blmh	Cacna1a	Cnp	Fermt3	Cers5	Emx2
Glb1	Bloc1s4	Cacybp	Coa5	Fgf13	Cetn2	Enc1
Glipr2	Bloc1s6	Calcoco1	Cog2	Fgfr1op	Cfdp1	Enpp4
Gls	Bmi1	Calcrl	Cog3	Fgfr1op2	Cfl1	Entpd7
Glyr1	Bmp2k	Calhm2	Col4a3bp	Fis1	Cfl2	Ep300
Gm42715	Bmpr1a	Calm1	Commd2	Fkbp1a	Cflar	Ep400
Gm527	Bmpr2	Calm2	Commd3	Flcn	Cggbp1	Epb41l3
Gmeb2	Bms1	Calm3	Commd4	Fli1	Cgrrf1	Epc1
Gmfb	Bmt2	Calr	Commd6	Flna	Chac1	Epc2
Gna13	Bnip2	Calu	Copa	Fmr1	Chaf1a	Ephb3
Gnai3	Bnip3	Camk1d	Copg2	Fnbp1	Champ1	Ephb4
Gnb1	Bnip3l	Camk2d	Cops2	Fnip1	Chd1	Eps15
Golph3	Bod1l	Camk2g	Cops5	Fos	Chd1l	Eps15l1
Gopc	Bola3	Camk4	Copz1	Foxj2	Chd2	Erbin
Gosr1	Bora	Camkk2	Coq10b	Foxn3	Chd4	Erg28
Gpatch8	Borcs7	Camsap1	Coro1a	Foxo1	Chd7	Ergic1
Gpbp1l1	Bphl	Camsap2	Coro1c	Foxo3	Chic2	Eri1
Gpd1l	Bpnt1	Camta1	Cotl1	Foxp1	Chmp2b	Erlin2
Gpkow	Bptf	Camta2	Cox11	Fpgt	Chmp3	Ermp1
Gpr146	Braf	Cand1	Cox5a	Frat1	Chmp4b	Esco2
Gpr174	Brap	Cant1	Cox6a1	Frat2	Chmp5	Esf1
Gpr183	Brat1	Canx	Cox6b1	Frmd6	Chordc1	Esyt1
Gramd3	Brca1	Cap1	Cox7a2	Frmd8	Chp1	Etaa1
Grap2	Brcc3	Capn1	Cox7a2l	Fry	Chst11	Etf1
Grk6	Brd1	Capn2	Cox7c	Ftl1	Chst3	Eva1c
Gsk3a	Brd2	Capn7	Cox8a	Fubp1	Chsy1	Evi5
Gsk3b	Brd3	Capns1	Cpd	Fundc1	Chtop	Ewsr1
Gspt1	Brd4	Caprin1	Cpeb4	Furin	Chuk	Exo1
Gtf2h1	Brd7	Capza1	Cpne3	Fus	Ciao2a	Exoc5
Gtf2h4	Brd8	Capza2	Cpsf2	Fxn	Cic	Ext1
Gtf2i	Brf2	Capzb	Cpsf6	Fxr1	Cip2a	Ezr
Gtpbp1	Bri3bp	Car5b	Cpsf7	Fyn	Cirbp	F2r
Gtpbp4	Brip1	Card19	Cramp1l	Fyttd1	Cisd2	F3
Gtpbp8	Brix1	Card6	Crbn	G2e3	Cish	Fads2
Gtse1	Brk1	Carf	Creb1	G3bp1	Cit	Fam104a
Gzmb	Brms1l	Cars2	Crebbp	G3bp2	Cited2	Fam107b
H2-D1	Brox	Casc3	Crebrf	Gabarap	Ckap4	Fam120a
H2-K1	Brpf1	Casd1	Crebzf	Gabpa	Ckap5	Fam126a
H2ax	Brpf3	Casp2	Crim1	Gabpb2	Cks1b	Fam126b
H3c1	Brwd1	Casp3	Crip1	Gak	Cks2	Fam133b
H3c3	Brwd3	Casp6	Crk	Galnt7	Clasp1	Fam13c
H3c8	Bsdc1	Casp7	Crkl	Gart	Clasp2	Fam160b1
H3f3b	Bsg	Casp8	Crlf3	Gata3	Clcn3	Fam168b
H4c11	Bst2	Casp8ap2	Crtc3	Gatad2b	Clcn4	Fam193a
Hars2	Btaf1	Cast	Cry1	Gbp2	Cldnd1	Fam219a
Hat1	Btbd1	Cat	Crybg1	Gclc	Clec2d	Fam222b
Hdac1	Btbd7	Cbfa2t2	Cs	Gdap2	Clec2i	Fam3c
Hdac2	Btbd9	Cbfb	Csde1	Gdi2	Clic1	Fam43a
Heatr1	Btg1	Cbl	Cse1l	Gem	Clic4	Fam76a
Heca	Btg2	Cblb	Csk	Gga3	Clint1	Fam76b
Hectd1	Btla	Cbll1	Csnk1a1	Ghitm	Clip1	Fam8a1
Heg1	Bub1	Cbwd1	Csnk1d	Gid4	Clk1	Fam91a1
Hells	Bub1b	Cbx1	Csnk1g1	Gid8	Clk2	Far1
Helz	Bub3	Cbx3	Csnk2a1	Gigyf1	Clk3	Farp1
Hemgn	Bysl	Cbx4	Cstf3	Gigyf2	Clk4	Farsa
Herpud1	Bzw1	Cbx5	Ctbp1	Gimap3	Clns1a	Fat1
Hexb	Bzw2	Cbx7	Ctcf	Gimap4	Clptm1	Fat4
Hilpda	C1d	Ccar1	Ctdnep1	Gimap6	Clptm1l	Fbln2
Hinfp	C1galt1	Ccar2	Ctdsp1	Glb1	Clpx	Fbln5
Hint1	C1galt1c1	Ccdc115	Ctdsp2	Glg1	Clspn	Fbn1
Hipk1	C1qbp	Ccdc117	Ctdspl2	Glipr2	Clta	Fbxl14
Hipk2	C2cd2l	Ccdc12	Ctla4	Gls	Cltc	Fbxl3
Hipk3	C2cd3	Ccdc126	Ctnnb1	Gltp	Cluh	Fbxl5
Hivep2	C2cd5	Ccdc127	Ctps	Glul	Cmpk1	Fbxo11
Hjurp	C330007P06Rik	Ccdc186	Ctsb	Gm2a	Cmtm6	Fbxo3
Hmgb1	C330018D20Rik	Ccdc25	Ctsc	Gm527	Cmtm7	Fbxo33
Hmgcr	Caap1	Ccdc32	Cul2	Gmeb2	Cnbp	Fbxo45
Hmgn1	Cab39	Ccdc34	Cul3	Gmfb	Cnep1r1	Fbxw11
Hmgxb3	Cab39l	Ccdc50	Cul4a	Gnaq	Cnn2	Fbxw7
Hmgxb4	Cabin1	Ccdc59	Cul5	Gnas	Cnn3	Fcho2
Hnrnpa0	Cables1	Ccdc6	Cxcr4	Gnb1	Cnnm3	Fchsd2
Hnrnpa1	Cables2	Ccdc71l	Cyb561a3	Gnl3	Cnot1	Fem1c
Hnrnpa2b1	Cacna1a	Ccdc82	Cyb5a	Golph3	Cnot2	Fgfr1op
Hnrnpab	Cacul1	Ccdc92	Cyb5b	Gopc	Cnot3	Fgfr2
Hnrnpd	Cacybp	Ccdc93	Cyb5r3	Gosr1	Cnot6	Fhdc1
Hnrnpdl	Cad	Ccl4	Cybc1	Gpatch8	Cnot6l	Fhl1
Hnrnpk	Calcrl	Ccm2	Cyc1	Gpbp1l1	Cnot7	Fhl3
Hook3	Calhm2	Ccn3	Cyfip2	Gpd1l	Cnot8	Fkbp14
Hopx	Calm1	Ccna2	Cyld	Gpkow	Cnot9	Fkbp1a
Hprt	Calm2	Ccnb1	Cyp11a1	Gpr174	Cnp	Fkbp3
Hrh2	Calm3	Ccnb2	Cyth1	Gpr183	Cnst	Flna
Hsbp1	Calr	Ccnc	Cyth3	Gramd3	Cntrob	Flrt3
Hsp90aa1	Calu	Ccnd2	Cytip	Grap2	Coa5	Fmn1
Hsp90ab1	Camk1d	Ccnd3	D030056L22Rik	Grk2	Cog2	Fmr1
Hsp90b1	Camk2d	Ccndbp1	D10Wsu102e	Grk6	Cog3	Fn1
Hspa14	Camk2g	Ccne2	D16Ertd472e	Grpel1	Cog7	Fn3krp
Hspa4	Camk4	Ccnf	D630039A03Rik	Gsk3a	Commd4	Fnbp4
Hspa5	Camkk2	Ccng1	D630045J12Rik	Gsk3b	Copa	Fndc3b
Hyal2	Caml	Ccng2	Dap	Gspt1	Copb1	Fnip1
Hyou1	Camsap1	Ccni	Dars	Gtf2h1	Cops9	Fos
Hypk	Camsap2	Ccnj	Dazap1	Gtf2h4	Copz1	Fosl2
Iars2	Cand1	Ccnk	Dazap2	Gtf2i	Coq10b	Foxj2
Ice1	Cand2	Ccnl1	Dbf4	Gtpbp1	Coq2	Foxn3
Icos	Cant1	Ccnl2	Dbi	Gtpbp4	Coro1a	Foxp1
Id1	Canx	Ccnq	Dbnl	Gtpbp8	Coro1c	Frg1
Id2	Cap1	Ccnt1	Dbr1	Gzmb	Coro2a	Frmd4a
Id3	Capn1	Ccnt2	Dcaf1	H1f0	Cotl1	Frmd6
Idh3a	Capn2	Ccny	Dcaf10	H2-D1	Cox11	Frs2
Ier3	Capn7	Ccp110	Dcaf12	H2-K1	Cox5a	Fscn1
Ier5	Capns1	Ccr2	Dcaf15	H2-M3	Cox6a1	Fst
Ifi209	Caprin1	Ccr4	Dcaf7	H2-Q4	Cox7a2	Fstl1
Ifitm1	Capza1	Ccr5	Dck	H2-Q7	Cox7a2l	Fth1
Ifnar1	Capza2	Ccr7	Dcp1a	H3f3b	Cox7b	Ftl1
Ifngr1	Capzb	Ccsap	Dcp2	H4c4	Cox8a	Fubp1
Igf1r	Car12	Ccser2	Dctn6	Hdac1	Cpeb2	Fubp3
Igfbp4	Card19	Cct2	Dcun1d1	Hdac7	Cpeb3	Fundc1
Igip	Carm1	Cct4	Dcun1d3	Heatr1	Cpeb4	Furin
Iigp1	Cars	Cct8	Dcun1d5	Heca	Cpne3	Fxn
Ikzf1	Cars2	Cd164	Ddb1	Hectd1	Cpox	Fxr1
Il17ra	Casc3	Cd2	Ddi2	Heg1	Cpsf1	Fyttd1
Il2	Casc4	Cd200	Ddit4	Helb	Cpsf2	Fzd2
Il2rb	Casd1	Cd200r1	Ddost	Hells	Cpsf4	Fzd5
Il6ra	Casp2	Cd226	Ddr1	Helz	Cpsf6	Fzd7
Il7r	Casp3	Cd247	Ddx10	Hemgn	Cpsf7	Fzd8
Ilf2	Casp6	Cd27	Ddx17	Herc3	Cr1l	G2e3
Immt	Casp7	Cd274	Ddx19a	Herpud1	Cramp1l	G3bp1
Impa1	Casp8	Cd28	Ddx21	Hikeshi	Crbn	G3bp2
Impa2	Casp8ap2	Cd2ap	Ddx23	Hilpda	Creb1	Gabarap
Impad1	Cat	Cd37	Ddx27	Hinfp	Creb3l2	Gabarapl1
Incenp	Cbfa2t2	Cd3d	Ddx3x	Hipk1	Crebbp	Gabbr1
Inf2	Cbfb	Cd3e	Ddx3y	Hipk3	Crebrf	Gabpa
Ino80d	Cbl	Cd3g	Ddx46	Hivep2	Crebzf	Gabpb1
Inpp1	Cblb	Cd4	Ddx5	Hjurp	Creg1	Gabpb2
Inpp4b	Cbll1	Cd40lg	Ddx52	Hmbox1	Creld2	Gak
Inpp5d	Cbwd1	Cd44	Ddx6	Hmgb1	Crim1	Galnt11
Insig2	Cbx1	Cd47	Deaf1	Hmgcr	Crkl	Galnt18
Insr	Cbx3	Cd48	Degs1	Hmgxb3	Crlf3	Ganab
Ints11	Cbx4	Cd5	Dek	Hnrnpa0	Crtc2	Gart
Ints2	Cbx5	Cd52	Dennd1b	Hnrnpa1	Crtc3	Gas1
Ipcef1	Cbx7	Cd53	Dennd2d	Hnrnpa2b1	Cry2	Gas2l1
Ipo7	Cbx8	Cd55	Dennd4b	Hnrnpa3	Cs	Gas6
Ipo9	Cc2d1b	Cd6	Dennd5a	Hnrnpab	Csde1	Gask1b
Iqgap1	Ccar1	Cd69	Depdc1b	Hnrnpd	Cse1l	Gata3
Iqgap2	Ccar2	Cd80	Derl1	Hnrnpdl	Csk	Gata6
Irak4	Ccdc102a	Cd81	Derl2	Hnrnpf	Csnk1a1	Gatad1
Ireb2	Ccdc115	Cd82	Desi2	Hnrnph1	Csnk1d	Gatad2b
Irf1	Ccdc117	Cd84	Dgat1	Hnrnpk	Csnk1e	Gca
Irf2bpl	Ccdc12	Cd9	Dgka	Hnrnpl	Csnk1g2	Gclc
Irf4	Ccdc122	Cd96	Dgkd	Hnrnpm	Csnk2a1	Gclm
Irgm2	Ccdc127	Cdan1	Dglucy	Hnrnpr	Csnk2a2	Gcnt1
Ist1	Ccdc137	Cdc14a	Dhcr24	Hnrnpu	Csnk2b	Gdap2
Itch	Ccdc186	Cdc14b	Dhdds	Hook3	Cstb	Gdi2
Itfg1	Ccdc25	Cdc20	Dhx15	Hp1bp3	Cstf2	Gid4
Itga6	Ccdc32	Cdc23	Dhx30	Hprt	Cstf2t	Gid8
Itgav	Ccdc34	Cdc25a	Dhx9	Hsbp1	Cstf3	Gigyf1
Itgb2	Ccdc50	Cdc25b	Diaph1	Hsp90aa1	Ctbp1	Gigyf2
Itgb3	Ccdc59	Cdc27	Diaph3	Hsp90ab1	Ctcf	Gja1
Itk	Ccdc6	Cdc37l1	Dido1	Hsp90b1	Ctdnep1	Gjc1
Itm2b	Ccdc71	Cdc40	Dip2b	Hspa14	Ctdp1	Glg1
Itprid2	Ccdc71l	Cdc42	Dipk2a	Hspa5	Ctdsp1	Gli3
Ivns1abp	Ccdc82	Cdc42ep3	Dis3	Huwe1	Ctdsp2	Gls
Jade1	Ccdc88c	Cdc42se1	Dkc1	Hyal2	Ctdspl2	Gltp
Jade2	Ccdc92	Cdc42se2	Dld	Hyou1	Ctla4	Glyr1
Jagn1	Ccdc93	Cdc45	Dlg1	Hypk	Ctnnb1	Gm42715
Jak1	Ccdc97	Cdc5l	Dlg4	Iars	Ctps	Gm527
Jak2	Ccl4	Cdc6	Dmxl1	Iars2	Ctsb	Gmeb2
Jmjd4	Ccna2	Cdc7	Dnaja1	Ice1	Ctsc	Gmfb
Jpt2	Ccnb1	Cdc73	Dnaja2	Icos	Ctse	Gmnn
Jun	Ccnb2	Cdca2	Dnajb1	Id1	Ctsh	Gna12
Kansl1	Ccnc	Cdca3	Dnajb12	Id2	Ctso	Gnai3
Kat5	Ccnd2	Cdca4	Dnajb6	Id3	Ctss	Gnaq
Kat7	Ccnd3	Cdca7l	Dnajb9	Ier3	Cul1	Gnas
Katnbl1	Ccndbp1	Cdip1	Dnajc10	Ier5	Cul2	Gnb1
Kbtbd11	Ccne1	Cdipt	Dnajc15	Ifi203	Cul4a	Gng12
Kbtbd2	Ccne2	Cdk1	Dnajc16	Ifi209	Cul5	Gnl3
Kcnab2	Ccnf	Cdk11b	Dnajc3	Ifit2	Cwc15	Golga3
Kcnn4	Ccng1	Cdk12	Dnajc5	Ifnar1	Cwc25	Golim4
Kctd20	Ccng2	Cdk13	Dnajc7	Ifngr1	Cxcl1	Golph3
Kdelr1	Ccni	Cdk17	Dnajc8	Ift80	Cxcl10	Gopc
Kdm1b	Ccnj	Cdk19	Dnajc9	Igf1r	Cxcr4	Gorasp2
Kdm5a	Ccnk	Cdk2	Dnmt1	Igfbp4	Cxcr5	Gpatch8
Kdm7a	Ccnl1	Cdk2ap2	Dnmt3a	Igip	Cxxc1	Gpbp1l1
Khdrbs1	Ccnl2	Cdk4	Dock10	Iigp1	Cxxc5	Gpc3
Kif11	Ccnq	Cdk5	Dock2	Ikzf1	Cyb561a3	Gpc4
Kif15	Ccnt1	Cdk6	Dock5	Il16	Cyb5a	Gpc6
Kif21b	Ccnt2	Cdk7	Dock8	Il2ra	Cyb5b	Gpkow
Kin	Ccny	Cdkal1	Dok2	Il2rb	Cyb5r4	Gpm6a
Klf13	Ccp110	Cdkl5	Dop1a	Il6ra	Cyba	Gps1
Klf2	Ccr2	Cdkn1a	Dpp4	Il7r	Cybb	Gpx8
Klf3	Ccr4	Cdkn1b	Dpp8	Ilf2	Cyc1	Gramd3
Klf6	Ccr5	Cdkn2aip	Dpy19l1	Impa1	Cyfip1	Grb10
Klf9	Ccr7	Cdkn2aipnl	Dpy19l4	Impad1	Cyfip2	Grk2
Klhdc2	Ccsap	Cdkn2c	Dpysl2	Inf2	Cyld	Grk6
Klhl12	Ccser2	Cdkn2d	Dr1	Ing1	Cyp51	Gsk3a
Klhl20	Cct2	Cdon	Drap1	Ino80	Cyth1	Gsk3b
Klhl24	Cct3	Cds2	Dtx3l	Ino80d	Cyth3	Gspt1
Klhl28	Cct4	Cdv3	Dusp10	Inpp4b	Cytip	Gsr
Klhl9	Cct7	Cdyl	Dusp11	Inpp5d	D10Wsu102e	Gtf2h1
Kmt2a	Cct8	Cdyl2	Dusp2	Insig2	D1Ertd622e	Gtf2h4
Kmt2c	Ccz1	Cebpb	Dusp5	Insr	D230025D16Rik	Gtpbp4
Kmt2d	Cd164	Cebpg	Dusp6	Ints12	D5Ertd579e	Gtpbp8
Kmt5b	Cd2	Celf1	Dusp7	Ints2	Daam1	Gulp1
Kpna3	Cd200	Celf2	Dvl2	Ints6	Dad1	H1f0
Kpna4	Cd226	Cenpa	Dvl3	Ints7	Dars	H1f2
Kpnb1	Cd247	Cenpc1	Dync1i2	Ip6k1	Daxx	H2az1
Krit1	Cd274	Cenpe	Dynll1	Ipcef1	Dazap1	H3c1
Krr1	Cd28	Cenpf	Dynll2	Ipo7	Dazap2	H3c14
Lamp1	Cd2ap	Cenpi	Dynlrb1	Iqgap1	Dbf4	H3c4
Lamtor3	Cd2bp2	Cenpq	Dyrk1a	Iqgap2	Dbi	H3f3b
Laptm4a	Cd37	Cenpt	Dyrk2	Ireb2	Dbnl	H4c8
Larp4b	Cd3d	Cenpx	E2f1	Irf1	Dbr1	Hat1
Lasp1	Cd3e	Cep120	E2f2	Irf2	Dcaf12	Hcfc1
Lbr	Cd3g	Cep135	E2f3	Irf2bp2	Dcaf6	Hdac1
Lck	Cd44	Cep170	E2f4	Irf2bpl	Dcaf7	Hdac7
Lcp2	Cd47	Cep192	E2f8	Irf4	Dcaf8	Hdgf
Ldha	Cd48	Cep350	Ect2	Irgm2	Dcbld1	Hdlbp
Lef1	Cd53	Cep55	Edc3	Ist1	Dck	Heatr1
Leprotl1	Cd69	Cep57	Edem1	Itch	Dclk2	Hectd1
Lfng	Cd80	Cep68	Edem3	Itga4	Dcp2	Heg1
Lig4	Cd81	Cep85l	Eea1	Itgav	Dcps	Hells
Lin54	Cd82	Cep97	Eed	Itgb1	Dctn4	Helz
Lipa	Cd84	Cept1	Eef1a1	Itgb2	Dctn6	Herpud1
Lman2	Cd8a	Cers2	Eef1b2	Itgb3	Dcun1d1	Hes1
Lmnb1	Cd8b1	Cers5	Eef2	Itk	Dcun1d5	Hipk1
Lnpep	Cd9	Cetn2	Eefsec	Itm2b	Ddb1	Hipk3
Lpcat3	Cd96	Cetn3	Efcab14	Itpk1	Ddi2	Hjurp
Lpin1	Cdc123	Cfap20	Efhd2	Itpr1	Ddit4	Hmgb1
Lpin2	Cdc14a	Cfap97	Efna5	Itprid2	Ddost	Hmgb2
Lpxn	Cdc14b	Cfdp1	Efr3a	Ivns1abp	Ddx17	Hmgb3
Lratd2	Cdc23	Cfl1	Eftud2	Izumo1r	Ddx19b	Hmgcr
Lrch1	Cdc25a	Cfl2	Egln1	Jade2	Ddx21	Hmgcs1
Lrch3	Cdc25b	Cflar	Egln3	Jagn1	Ddx27	Hmgn1
Lrig2	Cdc26	Cggbp1	Egr1	Jak1	Ddx39	Hmgn2
Lrmp	Cdc27	Cgrrf1	Egr3	Jak2	Ddx39b	Hmgxb3
Lrp6	Cdc34	Chac2	Ehmt1	Jmjd1c	Ddx3x	Hmgxb4
Lrrfip1	Cdc37	Chaf1a	Ei24	Jmjd4	Ddx3y	Hnrnpa0
Lsm14a	Cdc37l1	Champ1	Eif1	Jpt2	Ddx42	Hnrnpa1
Lsm14b	Cdc40	Chchd1	Eif1a	Jund	Ddx46	Hnrnpa2b1
Lsm2	Cdc42	Chd1	Eif1ad	Kansl1	Ddx5	Hnrnpa3
Lsm3	Cdc42bpg	Chd1l	Eif1b	Kantr	Ddx50	Hnrnpab
Lss	Cdc42se1	Chd2	Eif2a	Kat5	Ddx52	Hnrnpd
Ltn1	Cdc42se2	Chd3	Eif2ak1	Kat6a	Ddx58	Hnrnpdl
Luc7l2	Cdc45	Chd4	Eif2ak3	Kat7	Ddx6	Hnrnpf
Luc7l3	Cdc5l	Chd7	Eif2ak4	Katnbl1	Degs1	Hnrnph1
Ly6a	Cdc6	Chd8	Eif2s3y	Kbtbd11	Dek	Hnrnpk
Ly6c2	Cdc7	Chd9	Eif3a	Kctd2	Dennd1b	Hnrnpl
Ly6e	Cdc73	Chek1	Eif3b	Kctd20	Dennd4a	Hnrnpm
Ly75	Cdca2	Chek2	Eif3h	Kdm1b	Dennd4b	Hnrnpr
Lysmd3	Cdca3	Cherp	Eif3j1	Kdm5a	Dennd5a	Hnrnpu
Lysmd4	Cdca4	Chfr	Eif4a1	Kdm7a	Dennd5b	Hnrnpul1
Lyst	Cdca5	Chic2	Eif4a2	Khsrp	Depdc1b	Hook3
M6pr	Cdca7	Chmp2b	Eif4a3	Kif5b	Derl1	Hoxa10
Macf1	Cdca7l	Chmp3	Eif4b	Klf13	Derl2	Hoxb3
Mafk	Cdca8	Chmp4b	Eif4e	Klf2	Derl3	Hoxd13
Magt1	Cdip1	Chmp5	Eif4ebp2	Klf3	Desi2	Hp1bp3
Malsu1	Cdipt	Chmp7	Eif4enif1	Klf6	Dgkd	Hs2st1
Maml2	Cdk1	Chordc1	Eif4g1	Klhdc2	Dhcr24	Hs6st2
Man1a	Cdk12	Chp1	Eif4g2	Klhl12	Dhcr7	Hsbp1
Man1a2	Cdk13	Chst14	Eif4g3	Klhl20	Dhdds	Hsf2
Man2b1	Cdk17	Chsy1	Eif4h	Klhl24	Dhx15	Hsp90aa1
Manea	Cdk2	Chtop	Eif5	Klhl28	Dhx30	Hsp90ab1
Map2k1	Cdk2ap1	Chuk	Eif5a	Klhl9	Dhx35	Hsp90b1
Map3k1	Cdk2ap2	Ciao1	Eif5a2	Kmt2a	Dhx36	Hspa13
Map3k2	Cdk4	Cic	Eif5b	Kmt2b	Dhx38	Hspa14
Map3k5	Cdk5	Cinp	Elavl1	Kmt2c	Diaph1	Hspa5
Map3k8	Cdk6	Cip2a	Elf1	Kmt2d	Diaph2	Hspa9
Map4k5	Cdk7	Cisd2	Elf2	Kmt2e	Diaph3	Hspd1
Map7	Cdk9	Cish	Elf4	Kmt5b	Dip2b	Hspe1
Mapk1	Cdkl5	Cit	Elk1	Kpna3	Dipk2a	Hspg2
Mapk1ip1l	Cdkn1a	Cited2	Elk3	Kpna4	Dkc1	Htra1
Mapk9	Cdkn1b	Ckap2	Elk4	Kpnb1	Dld	Huwe1
Mapre1	Cdkn2aip	Ckap2l	Elmo1	Krit1	Dlg1	Hyal2
Marf1	Cdkn2aipnl	Ckap5	Elmo2	Krr1	Dlst	Hyou1
Mark2	Cdkn2c	Ckb	Elmsan1	L3mbtl2	Dmxl1	Hypk
Mast4	Cdkn2d	Cks1b	Eloa	Lamp1	Dnaja1	Iars
Mat2a	Cdon	Cks2	Elovl5	Lamtor3	Dnaja2	Iars2
Mat2b	Cds2	Clasp2	Emb	Laptm4a	Dnaja3	Ice1
Matr3	Cdv3	Clcn3	Emd	Laptm5	Dnajb1	Id1
Mau2	Cdyl	Clcn4	Eml4	Larp4b	Dnajb11	Id2
Mavs	Cebpb	Clcn7	Emsy	Lars2	Dnajb12	Id3
Max	Cebpg	Cldnd1	Enc1	Lasp1	Dnajb4	Id4
Mbip	Celf1	Clec2d	Ensa	Lats1	Dnajb6	Ide
Mbnl1	Celf2	Clec2i	Entpd5	Lbh	Dnajb9	Idh3a
Mcl1	Cemip2	Clic1	Entpd7	Lbr	Dnajc10	Ids
Mcm4	Cenpa	Clic4	Ep300	Lcp1	Dnajc3	Ier3
Mcm5	Cenpc1	Clint1	Epb41l2	Ldha	Dnajc5	Ier5
Mdc1	Cenpe	Clip1	Epc1	Ldlrad4	Dnajc7	Ier5l
Mdfic	Cenpf	Clk1	Epc2	Lef1	Dnajc8	Ifngr2
Mdm2	Cenpi	Clk2	Epg5	Lemd3	Dnajc9	Ifrd1
Mdm4	Cenpl	Clk4	Epm2aip1	Leng8	Dnase1l3	Igf1r
Med1	Cenpn	Cln6	Eprs	Leprotl1	Dnmt3a	Igf2bp2
Med14	Cenpq	Clns1a	Eps15	Lfng	Dock10	Igfbp4
Med17	Cenpw	Clp1	Eps15l1	Lig4	Dock11	Ikbip
Med23	Cenpx	Clpp	Epsti1	Limd2	Dock2	Il1rap
Mef2d	Cep120	Clptm1l	Erap1	Lin7c	Dock8	Il6st
Mettl17	Cep170	Clpx	Erbin	Lipa	Dok3	Ilf2
Mettl5	Cep170b	Clspn	Erg28	Lmnb1	Dop1a	Immt
Mex3b	Cep192	Clstn1	Eri1	Lnpep	Dph3	Impact
Mfsd14a	Cep350	Clta	Ermp1	Lpin1	Dpp3	Impad1
Mgat1	Cep41	Cltc	Ero1l	Lpin2	Dpp8	Incenp
Mgat4a	Cep55	Cluh	Errfi1	Lpxn	Dpy19l4	Inf2
Mia2	Cep57	Cmas	Esco1	Lratd2	Dpysl2	Ing1
Mia3	Cep57l1	Cmc2	Esco2	Lrch1	Dr1	Inhba
Midn	Cep68	Cmpk1	Esf1	Lrch3	Drg1	Ino80d
Mier1	Cep72	Cmtm4	Esyt1	Lrig1	Dtl	Insig1
Mier3	Cep76	Cmtm6	Esyt2	Lrig2	Dtx3	Insig2
Mindy2	Cep85	Cmtr2	Etaa1	Lrmp	Dtx3l	Insr
Mindy3	Cep85l	Cnbp	Etf1	Lrp6	Dusp1	Ints2
Minpp1	Cep97	Cnep1r1	Etnk1	Lrrc58	Dusp10	Ints6
Mis18a	Cept1	Cnih1	Ets1	Lrrc61	Dusp11	Ipo7
Mki67	Cercam	Cnn2	Etv3	Lrrc8c	Dusp16	Ipo9
Mlec	Cers2	Cnn3	Etv5	Lrrfip1	Dusp2	Iqgap1
Mllt10	Cers5	Cnnm3	Etv6	Lsm12	Dusp4	Ireb2
Mllt6	Cers6	Cnnm4	Evl	Lsm14a	Dusp5	Irf2bp2
Mlycd	Cetn2	Cnot1	Ewsr1	Lsm14b	Dusp6	Irf2bpl
Mmd	Cetn3	Cnot10	Exoc2	Lsm2	Dusp7	Irs1
Mndal	Cfap97	Cnot11	Exoc4	Lta	Dut	Irs2
Mob1a	Cfdp1	Cnot2	Exoc5	Ltb	Dvl2	Irx2
Mob4	Cfl1	Cnot3	Exosc1	Ltn1	Dvl3	Itch
Morc3	Cfl2	Cnot6	Ezh2	Luc7l2	Dync1i2	Itfg1
Mosmo	Cflar	Cnot6l	Ezr	Luc7l3	Dynll2	Itgav
Mphosph6	Cggbp1	Cnot7	F2r	Ly6c1	Dynlt3	Itgb1
Mphosph8	Cgrrf1	Cnot8	Faf2	Ly6c2	Dyrk1a	Itgb5
Mpp5	Chac1	Cnot9	Fam102a	Ly6e	Dyrk2	Itm2b
Mpp6	Chac2	Cnp	Fam104a	Ly75	Dzip3	Itpr1
Mppe1	Chaf1a	Cnst	Fam107b	Lysmd3	E2f1	Itprid2
Mrpl34	Champ1	Cntrl	Fam117b	Lyst	E2f2	Itpripl2
Mrpl45	Chchd1	Coa3	Fam118b	M6pr	E2f3	Ivns1abp
Mrps14	Chchd4	Coa5	Fam120a	Macf1	E2f4	Jade1
Mrps23	Chd1	Cog2	Fam120c	Madd	E2f8	Jag1
Mrtfa	Chd1l	Cog3	Fam126a	Mafk	Eaf1	Jmjd1c
Ms4a4b	Chd2	Cog6	Fam126b	Magt1	Ebf1	Jpt2
Ms4a6b	Chd3	Cog8	Fam133b	Mak16	Ebi3	Jund
Msantd2	Chd4	Col4a3bp	Fam160b1	Malsu1	Ect2	Kalrn
Msantd4	Chd7	Commd2	Fam168b	Malt1	Edem1	Kansl1
Msi2	Chd8	Commd3	Fam169b	Man1a	Edem3	Kat5
Msl2	Chd9	Commd4	Fam174a	Man1a2	Eea1	Kat6a
Msl3	Chek1	Commd6	Fam193a	Man2b1	Eed	Katnbl1
Msmo1	Chek2	Commd7	Fam199x	Manea	Eef1a1	Kcmf1
Msn	Cherp	Commd8	Fam20b	Map2k1	Eef1b2	Kctd20
Mta2	Chic2	Copa	Fam210a	Map3k1	Eef1e1	Kdelr1
Mtdh	Chmp2b	Copb1	Fam219a	Map3k2	Eef2	Kdelr2
Mtf2	Chmp3	Copb2	Fam43a	Map3k4	Eefsec	Kdm1b
Mtfmt	Chmp4b	Copg1	Fam49a	Map3k5	Efcab14	Kdm2a
Mthfd2	Chmp5	Copg2	Fam49b	Map3k8	Efhd2	Kdm3a
Mtmr12	Chmp6	Cops2	Fam53c	Map4k4	Efr3a	Kdm4c
Mtmr14	Chmp7	Cops5	Fam76a	Map4k5	Egr1	Kdm5a
Mtpn	Chordc1	Copz1	Fam76b	Map7	Egr2	Kdm5c
Myb	Chp1	Coq10b	Fam78a	Mapk1	Egr3	Kdm6a
Mycn	Chrac1	Coro1a	Fam8a1	Mapk1ip1l	Ehbp1l1	Khdrbs1
Myh9	Chst11	Coro1c	Fam91a1	Mapk9	Ehd1	Khsrp
Myl6	Chst12	Coro2a	Far1	Marchf6	Ehmt1	Kif11
Mzt1	Chst14	Coro7	Farsa	Marchf7	Ei24	Kif1b
N4bp2	Chst2	Cotl1	Fastkd3	Marf1	Eif1	Kif5b
N4bp2l2	Chsy1	Cox11	Fbrs	Mark2	Eif1a	Kifc3
Naa30	Chtop	Cox5a	Fbxl14	Mast4	Eif1ad	Kirrel
Naa40	Chuk	Cox6a1	Fbxl3	Mat2a	Eif1b	Klc1
Naa50	Ciao2a	Cox6c	Fbxl5	Mat2b	Eif2a	Klf3
Nabp1	Ciao2b	Cox7a2	Fbxo11	Matr3	Eif2ak1	Klf5
Nadk	Cic	Cox7a2l	Fbxo21	Mau2	Eif2ak3	Klf6
Nampt	Cilk1	Cox7c	Fbxo3	Max	Eif2ak4	Klf9
Nap1l4	Cinp	Cox8a	Fbxo32	Mbd2	Eif2s2	Klhdc2
Ncapd2	Cip2a	Cpd	Fbxo33	Mbip	Eif3a	Klhl20
Ncapd3	Cipc	Cpeb4	Fbxo38	Mbnl1	Eif3c	Klhl24
Ncbp3	Cisd1	Cpne3	Fbxo45	Mbp	Eif3d	Klhl9
Nck1	Cisd2	Cpox	Fbxo5	Mcl1	Eif3f	Kmt2a
Ncoa3	Cish	Cpsf2	Fbxo9	Mdfic	Eif3h	Kmt2c
Ncoa7	Cit	Cpsf6	Fbxw11	Mdm2	Eif3j1	Kmt2d
Ncstn	Cited2	Cpsf7	Fbxw2	Mecp2	Eif3k	Kmt2e
Ndst2	Ckap2l	Cracr2a	Fbxw7	Med1	Eif4a1	Kmt5b
Ndufa4	Ckap5	Cradd	Fchsd2	Med13	Eif4a2	Knl1
Ndufa6	Cks1b	Cramp1l	Fdx1	Med13l	Eif4a3	Kpna1
Ndufv1	Cks2	Crbn	Fem1c	Med14	Eif4b	Kpna3
Nedd1	Clasp1	Creb1	Fermt3	Med17	Eif4e	Kpna4
Nedd9	Clasp2	Crebbp	Fgf13	Med23	Eif4ebp1	Kpnb1
Nek7	Clcn3	Crebl2	Fgfr1op	Med4	Eif4ebp2	Kras
Nek9	Clcn4	Crebrf	Fgfr1op2	Mef2d	Eif4enif1	Krit1
Neurl1b	Clcn5	Crebzf	Fhl3	Mettl17	Eif4g1	Krr1
Neurl3	Clcn6	Crem	Filip1l	Mex3b	Eif4g2	Ktn1
Nfat5	Clcn7	Crim1	Fis1	Mfhas1	Eif4g3	Lamc1
Nfatc2	Cldnd1	Crip1	Fkbp1a	Mfn1	Eif4h	Lamp1
Nfatc2ip	Clec2d	Crk	Fkbp3	Mfsd14a	Eif5	Lamp2
Nfkb1	Clec2g	Crkl	Fkbp5	Mga	Eif5a	Lamtor1
Nfkbid	Clec2i	Crlf3	Flcn	Mgat1	Eif5b	Lamtor3
Nfkbiz	Clic1	Crmp1	Fli1	Mgat4a	Elavl1	Lap3
Nfx1	Clic4	Crnkl1	Flna	Mia2	Elf1	Laptm4a
Nfyb	Clint1	Crot	Flot2	Mia3	Elf2	Larp4
Nin	Clip1	Crtc3	Fmnl1	Mical3	Elf4	Larp4b
Nip7	Clk1	Cry1	Fmr1	Midn	Elk3	Lars2
Nipbl	Clk2	Crybg1	Fn3krp	Mier1	Elk4	Lasp1
Nktr	Clk3	Crybg3	Fnbp1	Mier3	Ell	Lbh
Nlk	Clk4	Cs	Fnbp4	Mindy2	Ell2	Lbr
Noc4l	Cln5	Csde1	Fndc3a	Mindy3	Elmo1	Ldha
Nop10	Cln6	Cse1l	Fnip1	Minpp1	Elmsan1	Ldlr
Notch1	Clns1a	Csgalnact2	Fos	Mki67	Elovl5	Ldlrad3
Notch2	Clp1	Csk	Foxj2	Mknk2	Elp2	Lemd3
Npat	Clpp	Csnk1a1	Foxj3	Mkrn1	Elp3	Leng8
Npc2	Clptm1	Csnk1d	Foxk1	Mlec	Emc3	Leprotl1
Nr2c2	Clptm1l	Csnk1e	Foxn2	Mllt10	Emc6	Lfng
Nr3c1	Clpx	Csnk1g1	Foxn3	Mllt3	Emd	Lgals1
Nrarp	Clspn	Csnk1g2	Foxo1	Mllt6	Emg1	Lgr4
Nras	Clstn1	Csnk1g3	Foxo3	Mlycd	Eml4	Lig4
Nrde2	Clta	Csnk2a1	Foxp1	Mmd	Emp1	Lin54
Nrf1	Cltc	Csnk2a2	Fpgt	Mob1a	Emsy	Lin7c
Nrip1	Cluh	Cspp1	Frat1	Mob1b	Ensa	Lin9
Nsd3	Cmas	Cstb	Frat2	Mob4	Entpd7	Lipa
Nsg2	Cmc1	Cstf1	Frg1	Morc3	Ep300	Lix1l
Nsrp1	Cmc2	Cstf2t	Frmd6	Mosmo	Ep400	Lman1
Nt5dc1	Cmpk1	Cstf3	Frmd8	Mospd3	Epb41	Lman2
Nucks1	Cmtm4	Ctbp1	Fry	Mphosph6	Epb41l2	Lmbrd2
Nudt21	Cmtm6	Ctcf	Ftl1	Mphosph8	Epc1	Lmna
Nuf2	Cmtm7	Ctdnep1	Fubp1	Mplkip	Epc2	Lmnb1
Nufip2	Cmtr2	Ctdp1	Fubp3	Mpp5	Epn1	Lmo4
Nup107	Cnbp	Ctdsp1	Fundc1	Mrfap1	Eprs	Lnpep
Nup153	Cndp2	Ctdsp2	Fundc2	Mrpl10	Eps15	Lox
Nup160	Cnep1r1	Ctdspl2	Furin	Mrpl45	Eps15l1	Lpin1
Nup50	Cnih1	Ctla4	Fus	Mrps14	Eral1	Lpin2
Nus1	Cnksr3	Ctnna1	Fut11	Mrtfa	Erap1	Lpp
Nxpe3	Cnn2	Ctnnb1	Fxn	Ms4a4b	Erbin	Lratd2
Ociad1	Cnn3	Ctps	Fxr1	Ms4a6b	Ercc6	Lrch1
Oga	Cnnm3	Ctsb	Fxr2	Msantd4	Erg28	Lrch3
Ogt	Cnnm4	Ctsc	Fyb	Msi2	Ergic1	Lrp1
Opa1	Cnot1	Ctss	Fyn	Msl2	Ero1l	Lrp6
Opa3	Cnot10	Cul1	Fyttd1	Msl3	Ero1lb	Lrrc58
Orc1	Cnot11	Cul2	Fzd5	Msmo1	Erp29	Lrrc59
Osbp	Cnot2	Cul3	Fzr1	Msn	Esco2	Lrrc75b
Osbpl2	Cnot3	Cul4a	G2e3	Mta2	Esf1	Lrrfip1
Osbpl8	Cnot6	Cul5	G3bp1	Mtdh	Esyt1	Lsm12
Ost4	Cnot6l	Cwc15	G3bp2	Mtf2	Esyt2	Lsm14a
Ostc	Cnot7	Cwc25	G6pdx	Mtfmt	Etaa1	Lsm14b
Ostf1	Cnot8	Cwc27	Gabarap	Mthfd2	Etf1	Lsm2
Otud4	Cnot9	Cxcr4	Gabpa	Mtmr12	Etnk1	Lsm3
Otulin	Cnp	Cxxc1	Gabpb1	Mtmr14	Ets1	Lss
Otulinl	Cnst	Cyb561a3	Gabpb2	Mtmr3	Ets2	Ltbp1
Oxct1	Cntrl	Cyb5a	Gak	Mtpn	Etv3	Ltn1
P2ry10	Coa3	Cyb5b	Galnt1	Myb	Etv5	Ltv1
P4ha1	Coa5	Cyb5r3	Galnt11	Myc	Etv6	Luc7l2
P4hb	Cobll1	Cyb5r4	Galnt7	Myh9	Evl	Luc7l3
Pa2g4	Cog2	Cybc1	Gar1	Myl6	Ewsr1	Luzp1
Pafah1b1	Cog3	Cyc1	Gart	Mylip	Exo1	Ly75
Pafah1b2	Cog5	Cyfip2	Gata3	Mzt1	Exoc4	Lysmd3
Pag1	Cog6	Cyld	Gatad1	N4bp2	Exoc6	Lysmd4
Paics	Cog8	Cyp51	Gatad2a	N4bp2l1	Exosc3	Lzts2
Paip2	Col4a3bp	Cysltr1	Gatad2b	N4bp2l2	Exosc7	M6pr
Pak2	Colgalt1	Cystm1	Gatd1	Naa15	Ezh2	Macf1
Pan3	Commd10	Cyth1	Gbp2	Naa30	Ezr	Mad2l1
Pank1	Commd2	Cyth2	Gclc	Naa35	Fads2	Maf
Pank3	Commd3	Cyth3	Gclm	Naa50	Faim	Mafk
Papola	Commd4	Cyth4	Gdap2	Nabp1	Fam104a	Maged1
Papolg	Commd6	Cytip	Gdi1	Nadk	Fam107b	Magi1
Parp11	Commd8	D030056L22Rik	Gdi2	Nampt	Fam114a2	Magt1
Parp14	Copa	D10Wsu102e	Gem	Nap1l4	Fam117b	Malsu1
Patl1	Copb1	D16Ertd472e	Gfod1	Nars2	Fam118b	Maml1
Paxip1	Copb2	D230025D16Rik	Gga3	Nbr1	Fam120a	Maml2
Pbrm1	Copg2	D2hgdh	Ggact	Ncapd2	Fam126a	Man1a
Pcbp1	Coprs	D5Ertd579e	Ggnbp2	Ncapd3	Fam133b	Man1a2
Pcf11	Cops2	D630039A03Rik	Ggps1	Nck1	Fam160b1	Man1c1
Pclaf	Cops5	Daam1	Ghitm	Nckap1l	Fam168b	Man2a1
Pcmtd1	Cops7a	Dad1	Gid4	Ncoa3	Fam169b	Manea
Pcnt	Cops8	Dag1	Gid8	Ncoa7	Fam174a	Manf
Pdcd10	Cops9	Daglb	Gigyf1	Ncstn	Fam193a	Map3k1
Pdcd11	Copz1	Dalrd3	Gigyf2	Ndfip1	Fam214a	Map3k2
Pdcd6ip	Coq10b	Dap	Gimap3	Ndst2	Fam219a	Map3k3
Pdcd7	Coq2	Dap3	Gimap4	Ndufa4	Fam241a	Map3k4
Pdcl3	Coq4	Dars	Gimap6	Ndufa6	Fam32a	Map3k5
Pde3b	Coq6	Dazap1	Gimap8	Ndufv1	Fam3c	Map3k8
Pde4b	Coro1c	Dazap2	Gimap9	Nedd1	Fam43a	Map4
Pde7a	Coro2a	Dbf4	Git1	Nedd9	Fam49b	Map4k3
Pdhx	Coro7	Dbi	Git2	Nek9	Fam53c	Map4k4
Pdia6	Cotl1	Dbnl	Glb1	Nemf	Fam76a	Map4k5
Pdik1l	Cox11	Dbr1	Glg1	Nepro	Fam76b	Map7d1
Pdlim5	Cox15	Dbt	Glipr2	Neurl1b	Fam8a1	Mapk1
Pdpk1	Cox18	Dcaf1	Glo1	Neurl3	Fam91a1	Mapk1ip1l
Pds5a	Cox5a	Dcaf10	Glrx	Nfat5	Fam98b	Marchf6
Pds5b	Cox5b	Dcaf11	Gls	Nfatc2	Fancd2	Marcks
Pdzd8	Cox6a1	Dcaf12	Gltp	Nfatc2ip	Far1	Marcksl1
Peak1	Cox6b1	Dcaf15	Glul	Nfatc3	Farsa	Mark2
Peli1	Cox6c	Dcaf5	Glyr1	Nfe2l2	Fasn	Mast4
Pes1	Cox7a2	Dcaf6	Gm10521	Nfkb1	Fastkd3	Mat2a
Pex1	Cox7a2l	Dcaf7	Gm2a	Nfkbia	Fbrs	Mat2b
Pex12	Cox7b	Dcaf8	Gm42715	Nfkbid	Fbrsl1	Mbd2
Phc3	Cox7c	Dck	Gm527	Nfkbiz	Fbxl14	Mbd5
Phf10	Cox8a	Dclre1b	Gmeb2	Nfx1	Fbxl17	Mbip
Phf13	Cpeb2	Dcp1a	Gmfb	Nfyb	Fbxl3	Mbnl1
Phf20	Cpeb4	Dcp2	Gmip	Nhlrc2	Fbxo11	Mbnl2
Phf3	Cpne3	Dctn4	Gmnn	Nin	Fbxo21	Mbtps1
Phf6	Cpox	Dctn6	Gna13	Nip7	Fbxo3	Mcc
Phf8	Cpsf1	Dcun1d1	Gnai2	Nipbl	Fbxo32	Mcl1
Phlpp1	Cpsf2	Dcun1d2	Gnai3	Nktr	Fbxo33	Mcm2
Pias1	Cpsf4	Dcun1d3	Gnaq	Nlk	Fbxo34	Mcm3
Pias2	Cpsf6	Dcun1d4	Gnas	Nmi	Fbxo45	Mcm4
Pias3	Cpsf7	Dcun1d5	Gnb1	Noc4l	Fbxw11	Mcm6
Picalm	Cpt1a	Dda1	Gng2	Nono	Fbxw2	Mcmbp
Pik3ca	Cptp	Ddb1	Gnl3	Nop10	Fbxw7	Mcu
Pik3r1	Cradd	Ddi2	Gnl3l	Notch1	Fcer2a	Mdc1
Pik3r4	Cramp1l	Ddit4	Gnpda1	Notch2	Fcgr2b	Mdfic
Pikfyve	Crbn	Ddost	Golga3	Npat	Fcho2	Med1
Pim1	Creb1	Ddr1	Golga4	Npc2	Fchsd2	Med13
Pim2	Crebbp	Ddx10	Golga7	Npm1	Fcrla	Med13l
Pip4k2c	Crebrf	Ddx17	Golph3	Nr2c2	Fem1a	Med14
Pip5k1a	Crebzf	Ddx19a	Gopc	Nr3c1	Fem1b	Med17
Pisd	Crem	Ddx19b	Gorasp2	Nrarp	Fem1c	Med23
Pitpnc1	Crim1	Ddx21	Gosr1	Nrip1	Fen1	Med31
Plac8	Crk	Ddx23	Gpatch8	Nsd1	Fermt3	Mef2d
Plagl2	Crkl	Ddx27	Gpbp1	Nsd3	Ffar1	Meis1
Plcl2	Crlf3	Ddx3x	Gpbp1l1	Nsg2	Ffar2	Meis2
Plec	Crls1	Ddx3y	Gpcpd1	Nsrp1	Fgl2	Mest
Plekha5	Crnkl1	Ddx42	Gpd1l	Nt5c3	Fis1	Met
Plekhm2	Crot	Ddx46	Gpi1	Ntng2	Fkbp1a	Mex3a
Pmaip1	Crtc3	Ddx5	Gpkow	Nucks1	Fkbp3	Mex3b
Pmpca	Cry1	Ddx50	Gpr132	Nudt21	Fkbp8	Mex3d
Pnisr	Crybg1	Ddx52	Gpr171	Nuf2	Flcn	Mfn1
Pnrc2	Crybg3	Ddx6	Gpr174	Nufip2	Fli1	Mfsd14a
Polb	Cs	Deaf1	Gpr183	Nup107	Flna	Mfsd14b
Pold3	Csde1	Degs1	Gprin3	Nup153	Flt3	Mgat1
Poldip3	Cse1l	Dek	Gramd3	Nup35	Fmnl1	Mgat3
Polg	Csk	Dennd11	Grap	Nup50	Fmnl3	Mia2
Polr1c	Csnk1a1	Dennd1b	Grap2	Nus1	Fmr1	Mia3
Polr2e	Csnk1d	Dennd2d	Grb2	Nxf1	Fnbp1	Mical2
Polr2m	Csnk1g1	Dennd4a	Grk2	Nxpe3	Fnbp4	Mical3
Polr3f	Csnk1g2	Dennd4b	Grk6	Oaz1	Fndc3a	Midn
Pou2f1	Csnk1g3	Dennd5a	Grpel1	Ociad1	Fndc3b	Mier1
Ppa1	Csnk2a1	Dennd6a	Gsk3a	Oga	Fnip1	Mier3
Ppan	Csnk2a2	Depdc1b	Gsk3b	Ogt	Fos	Minpp1
Ppfia1	Csnk2b	Derl1	Gspt1	Opa1	Fosb	Mis18a
Ppil1	Cspp1	Derl2	Gtf2a1	Orc1	Fosl2	Mki67
Ppip5k2	Csrp1	Desi2	Gtf2b	Osbp	Foxj2	Mlec
Ppm1g	Cst3	Det1	Gtf2h4	Osbpl2	Foxj3	Mlf2
Ppm1h	Cst7	Dgat1	Gtf2i	Osbpl8	Foxk1	Mllt10
Ppp1cb	Cstf1	Dgka	Gtpbp1	Ost4	Foxn2	Mlycd
Ppp1r10	Cstf2	Dgkd	Gtpbp2	Otud4	Foxn3	Mmd
Ppp1r12a	Cstf2t	Dgkh	Gtpbp4	Otulinl	Foxo1	Mmp11
Ppp1r15b	Cstf3	Dgkz	Gtpbp8	Oxr1	Foxo3	Mmp2
Ppp1r16b	Ctbp1	Dglucy	Gtse1	P2ry10	Foxp1	Mn1
Ppp1r18	Ctcf	Dhcr24	Gzf1	P4ha1	Frat2	Mob1a
Ppp1r9b	Ctdnep1	Dhcr7	Gzmb	Pa2g4	Frg1	Mob1b
Ppp2r2a	Ctdp1	Dhdds	H1f0	Pafah1b1	Frs2	Mob4
Ppp2r5c	Ctdsp1	Dhx15	H2-D1	Pag1	Fry	Mogs
Ppp2r5e	Ctdsp2	Dhx30	H2-K1	Paip2	Fryl	Morc3
Ppp4r2	Ctdspl2	Dhx36	H2-M3	Pak2	Fscn1	Morf4l2
Ppp4r3a	Ctla4	Dhx40	H2-Q4	Pan3	Fth1	Mosmo
Ppp4r3b	Ctnna1	Dhx8	H2-Q7	Pank3	Ftl1	Mospd2
Ppp5c	Ctnnb1	Dhx9	H2aj	Papola	Ftl1-ps1	Mphosph6
Ppp6c	Ctps	Diaph1	H2ax	Papolg	Fubp1	Mphosph8
Ppp6r3	Ctsb	Diaph2	H2az1	Parp11	Fubp3	Mpp5
Pptc7	Ctsc	Diaph3	H2az2	Parp14	Fundc1	Mpp6
Prc1	Ctss	Dido1	H2bc6	Patl1	Fundc2	Mras
Prdm4	Cul1	Dimt1	H3c1	Paxip1	Furin	Mrc2
Prex1	Cul2	Dip2b	H3c13	Pbrm1	Fus	Mrfap1
Prkab1	Cul3	Dipk1a	H3c6	Pcbp2	Fxr1	Mrpl34
Prkag1	Cul4a	Dipk2a	H3f3a	Pced1b	Fxr2	Mrpl50
Prkar1a	Cul4b	Dis3	H3f3b	Pcf11	Fyn	Mrps14
Prkar2a	Cul5	Dkc1	H4c1	Pcmtd1	Fyttd1	Mrtfa
Prkci	Cuta	Dld	H4c2	Pcmtd2	Fzr1	Mrtfb
Prpf38a	Cwc15	Dlg1	H4c4	Pdcd10	G2e3	Msi2
Prpf38b	Cwc25	Dlg4	Hacd3	Pdcd11	G3bp1	Msl2
Prpf39	Cwc27	Dmxl1	Hadh	Pdcd4	G3bp2	Msl3
Prpf40a	Cxcr3	Dnah8	Hars2	Pdcd6	Gabarap	Msmo1
Prpf4b	Cxcr4	Dnaja1	Hat1	Pdcd6ip	Gabbr1	Msn
Prpf8	Cxcr6	Dnaja2	Hcfc1	Pdcd7	Gabpa	Msrb3
Prr11	Cxxc1	Dnajb1	Hcfc2	Pdcl3	Gabpb1	Mta2
Prr3	Cyb561a3	Dnajb12	Hdac1	Pde3b	Gabpb2	Mtdh
Prrc2c	Cyb561d1	Dnajb14	Hdac2	Pde4b	Gak	Mtf2
Psap	Cyb5a	Dnajb9	Hdac4	Pde4d	Galnt1	Mtfr1
Psd4	Cyb5b	Dnajc1	Hdac7	Pde7a	Galnt11	Mthfd1l
Psmb8	Cyb5r1	Dnajc10	Hdgf	Pdhx	Ganab	Mthfd2
Psme3	Cyb5r3	Dnajc13	Heatr1	Pdia6	Gars	Mtmr12
Ptbp1	Cyb5r4	Dnajc15	Heca	Pdik1l	Gatad2a	Mtmr14
Ptbp3	Cyba	Dnajc16	Hectd1	Pdk1	Gatad2b	Mtrex
Ptcd2	Cybc1	Dnajc21	Heg1	Pdlim5	Gbf1	Mtss1
Pten	Cyc1	Dnajc24	Helb	Pdpk1	Gbp2	Myc
Ptger4	Cyfip2	Dnajc3	Hells	Pds5a	Gcc2	Mycn
Ptgr2	Cyhr1	Dnajc5	Helz	Pdzd8	Gclc	Myh10
Ptp4a2	Cyld	Dnajc7	Hemgn	Peak1	Gclm	Myh9
Ptp4a3	Cyp20a1	Dnajc8	Herc3	Peli1	Gdap2	Myl6
Ptpn18	Cyp51	Dnajc9	Herpud1	Pex1	Gdi1	Myof
Ptpn22	Cystm1	Dnm1l	Herpud2	Pfkfb3	Gdi2	Myrf
Ptpn4	Cyth1	Dnm2	Hexb	Pfn1	Gem	Mzt1
Ptpn7	Cyth2	Dnmt1	Hexim1	Pgam1	Gemin7	N4bp2
Ptpra	Cyth3	Dnmt3a	Higd1a	Phc3	Gfpt1	N4bp2l2
Ptprc	Cyth4	Dntt	Hikeshi	Phf13	Gga2	Naa15
Ptpre	Cytip	Dnttip2	Hilpda	Phf2	Gga3	Naa35
Purb	D030056L22Rik	Dock10	Hinfp	Phf20	Ggta1	Naa50
Pus10	D10Wsu102e	Dock11	Hipk1	Phf3	Ghitm	Nacc1
Pwp1	D16Ertd472e	Dock2	Hipk2	Phf6	Gid4	Nadk
Qars	D1Ertd622e	Dock5	Hipk3	Phf8	Gid8	Nampt
Qk	D230025D16Rik	Dock8	Hira	Phip	Gigyf1	Nap1l1
R3hdm1	D2hgdh	Dok2	Hivep1	Phlpp1	Gigyf2	Nasp
R3hdm4	D3Ertd751e	Donson	Hivep2	Pi4k2a	Gimap3	Nav2
Rab10	D5Ertd579e	Dop1a	Hjurp	Pias1	Gimap4	Nbeal1
Rab14	D630039A03Rik	Dph3	Hk1	Pias2	Gimap6	Ncam1
Rab19	D630045J12Rik	Dph5	Hk2	Pias3	Git1	Ncapd2
Rab21	Daam1	Dpp4	Hmbox1	Picalm	Git2	Ncapd3
Rab35	Dad1	Dpp8	Hmgb1	Pik3c2b	Gk	Ncaph
Rab37	Dag1	Dpy19l1	Hmgb2	Pik3ca	Glb1	Nckap1
Rab5c	Daglb	Dpy19l3	Hmgcr	Pik3cb	Glg1	Ncoa3
Rab7	Dalrd3	Dpy19l4	Hmgcs1	Pik3cd	Glipr1	Ncoa6
Rabep1	Dap	Dpy30	Hmgn1	Pik3r1	Glipr2	Ncstn
Rabgap1	Dapk2	Dpysl2	Hmgn2	Pik3r4	Gls	Ndel1
Rac2	Dars	Dr1	Hmgxb3	Pikfyve	Glt8d1	Ndfip1
Rad21	Daxx	Dram2	Hmgxb4	Pim1	Gltp	Ndst2
Rad54l	Dazap1	Drap1	Hmmr	Pim2	Glud1	Ndufa4
Ramac	Dazap2	Drg1	Hnrnpa0	Pip4k2c	Glul	Ndufv1
Ran	Dbf4	Dsn1	Hnrnpa1	Pip4p2	Glyr1	Nedd1
Ranbp1	Dbi	Dst	Hnrnpa2b1	Pip5k1a	Gm10184	Nedd4
Ranbp2	Dbnl	Dstyk	Hnrnpa3	Plagl2	Gm10282	Nedd9
Ranbp3	Dbr1	Dtl	Hnrnpab	Plcl2	Gm2a	Nek7
Ranbp9	Dbt	Dtx3	Hnrnpd	Plec	Gm3550	Net1
Rap1b	Dcaf1	Dtx3l	Hnrnpdl	Plekha5	Gm527	Nf1
Rapgef2	Dcaf10	Dtymk	Hnrnpf	Plekhm2	Gm6169	Nfat5
Rapgef6	Dcaf11	Dusp1	Hnrnph1	Plk1	Gm6377	Nfatc2ip
Rara	Dcaf12	Dusp10	Hnrnph3	Plod2	Gm8369	Nfe2l1
Rasa2	Dcaf15	Dusp11	Hnrnpk	Plp2	Gmeb2	Nfe2l3
Rasa3	Dcaf5	Dusp12	Hnrnpl	Pmpca	Gmfb	Nfib
Rasgrp1	Dcaf7	Dusp2	Hnrnpm	Pnisr	Gmip	Nfic
Rassf3	Dcaf8	Dusp22	Hnrnpr	Pnn	Gmnn	Nfix
Rassf5	Dcbld2	Dusp5	Hnrnpu	Pnpla7	Gna13	Nfkbia
Rb1cc1	Dck	Dusp6	Hnrnpul1	Pnrc1	Gnai2	Nfkbid
Rbbp4	Dclre1b	Dusp7	Hook3	Pnrc2	Gnai3	Nfkbiz
Rbbp5	Dcp1a	Dut	Hp1bp3	Polb	Gnas	Nfxl1
Rbbp6	Dcp2	Dvl2	Hpcal1	Pold3	Gnb1	Nfya
Rbbp8	Dcps	Dvl3	Hprt	Polg	Gng12	Nfyb
Rbl1	Dctn4	Dync1i2	Hrh2	Polk	Gng2	Nid1
Rbm22	Dctn5	Dync1li1	Hsbp1	Polr1c	Gnl3	Ninj1
Rbm26	Dctn6	Dync1li2	Hsd17b7	Polr2a	Gnl3l	Ninl
Rbm33	Dcun1d1	Dynll1	Hsf2	Polr2m	Gnpat	Nip7
Rbm34	Dcun1d2	Dynll2	Hsp90aa1	Polr3f	Gnptab	Nipbl
Rbm39	Dcun1d3	Dynlrb1	Hsp90ab1	Pou2f1	Golga4	Nisch
Rbm7	Dcun1d4	Dyrk1a	Hsp90b1	Pou2f2	Golga7	Nktr
Rbms1	Dcun1d5	Dyrk2	Hspa14	Ppan	Golph3	Nmt2
Rbms2	Dda1	Dyrk3	Hspa4	Ppfia1	Golph3l	Noc4l
Rbpj	Ddb1	Dzip3	Hspa5	Ppia	Gopc	Nomo1
Rc3h1	Ddhd1	E130309D02Rik	Hspa9	Ppil1	Gorasp2	Nono
Rc3h2	Ddhd2	E2f2	Hspd1	Ppil4	Gosr1	Nop10
Rcbtb1	Ddi2	E2f3	Hspe1	Ppip5k2	Got1	Notch2
Rchy1	Ddit4	E2f4	Htatsf1	Ppm1b	Got2	Npat
Rcl1	Ddost	E2f7	Htr1b	Ppm1h	Gpalpp1	Npc1
Rcn1	Ddr1	E2f8	Hus1	Ppp1ca	Gpat4	Npepps
Rcor1	Ddx1	Eaf1	Huwe1	Ppp1cb	Gpatch2l	Npnt
Rdx	Ddx10	Eapp	Hvcn1	Ppp1r10	Gpatch8	Nptn
Rel	Ddx17	Ebag9	Hyal2	Ppp1r12a	Gpbp1	Nr2c2
Relch	Ddx19a	Ebi3	Hyou1	Ppp1r15b	Gpbp1l1	Nr2f2
Rer1	Ddx19b	Echdc1	Hypk	Ppp1r16b	Gpcpd1	Nr3c1
Rere	Ddx20	Echs1	Iars	Ppp1r18	Gpd1l	Nras
Resf1	Ddx21	Ecpas	Iars2	Ppp1r9b	Gpd2	Nrip1
Rest	Ddx23	Ect2	Ice1	Ppp2r1a	Gpkow	Nsd1
Retreg1	Ddx27	Edc3	Icos	Ppp2r2a	Gpm6a	Nucks1
Rfc1	Ddx39	Edem1	Id1	Ppp2r5e	Gpr174	Nudcd1
Rfx3	Ddx39b	Edem3	Id2	Ppp4r2	Gpr18	Nudt21
Rfx7	Ddx3x	Eea1	Id3	Ppp4r3a	Gpr65	Nudt4
Rgp1	Ddx3y	Eed	Idh3a	Ppp4r3b	Gpx1	Nuf2
Rhoa	Ddx41	Eef1a1	Ier3	Ppp5c	Gramd3	Nufip2
Rhog	Ddx42	Eef1b2	Ier5	Ppp6c	Gramd4	Nup107
Rhoh	Ddx46	Eef2	Ifi203	Ppp6r3	Grap	Nup153
Ric1	Ddx5	Eefsec	Ifi209	Pptc7	Grap2	Nup155
Rif1	Ddx51	Efcab14	Ifit2	Prdm15	Grb2	Nup160
Rinl	Ddx52	Efhd2	Ifnar1	Primpol	Grk2	Nup35
Riox1	Ddx56	Efna4	Ifngr1	Prkab1	Grk6	Nup50
Ripor2	Ddx6	Efr3a	Ift80	Prkacb	Grn	Nup54
Rlim	Dedd	Eftud2	Igf1r	Prkag1	Grsf1	Nus1
Rmi2	Dedd2	Egln1	Igfbp4	Prkar1a	Gsk3a	Nxf1
Rnf10	Degs1	Egln3	Igip	Prkar2a	Gsk3b	Oaz1
Rnf115	Dek	Egr1	Iigp1	Prkch	Gspt1	Odc1
Rnf144a	Dennd1b	Egr3	Ikzf1	Prkci	Gtf2a1	Oga
Rnf169	Dennd2d	Ehhadh	Il10	Prpf38b	Gtf2a2	Ogt
Rnf185	Dennd4a	Ehmt1	Il16	Prpf39	Gtf2b	Ola1
Rnf187	Dennd4b	Ei24	Il17ra	Prpf40a	Gtf2e1	Olfml2b
Rnf19a	Dennd5a	Eid1	Il19	Prpf4b	Gtf2h1	Opa1
Rnf2	Dennd6a	Eif1	Il2	Prpf8	Gtf2h5	Opa3
Rnf227	Depdc1a	Eif1a	Il21r	Prr12	Gtf3c3	Orc1
Rnf38	Depdc1b	Eif1b	Il2ra	Prr3	Gtpbp1	Osbp
Rnf7	Dera	Eif2a	Il2rb	Prrc2c	Gtpbp10	Osbpl2
Rngtt	Derl1	Eif2ak1	Il4ra	Psd4	Gtpbp2	Ost4
Rock1	Derl2	Eif2ak3	Il7r	Psip1	Gtpbp4	Ostc
Rock2	Desi1	Eif2ak4	Ilf2	Psmb8	Gtpbp8	Otub1
Rpe	Desi2	Eif2d	Ilf3	Psmd11	Gtse1	Otud4
Rpf1	Det1	Eif2s1	Ilk	Ptbp1	Gusb	Otud7b
Rpl22l1	Dgat1	Eif2s2	Ilrun	Ptbp3	Gzmb	Otx1
Rpl32	Dgka	Eif2s3y	Immt	Ptcd2	H13	Oxct1
Rpl7l1	Dgkd	Eif3a	Impa1	Ptch1	H1f0	P3h1
Rpn1	Dgke	Eif3b	Impa2	Pten	H1f2	P3h4
Rps27l	Dgkh	Eif3c	Impad1	Ptger4	H2-Aa	P4ha1
Rps3	Dgkz	Eif3d	Impdh1	Ptges3	H2-D1	P4hb
Rps6ka3	Dglucy	Eif3e	Incenp	Ptgr2	H2-DMa	Pa2g4
Rpusd4	Dhcr24	Eif3f	Ing1	Ptk2b	H2-DMb1	Pabpc1
Rras2	Dhcr7	Eif3h	Ino80	Ptma	H2-DMb2	Pafah1b1
Rrm2	Dhdds	Eif3j1	Ino80d	Ptp4a3	H2-Eb1	Pafah1b2
Rrp1b	Dhrs13	Eif3l	Inpp1	Ptpn1	H2-K1	Paip1
Rsbn1	Dhx15	Eif4a1	Inpp4a	Ptpn18	H2-M3	Paip2
Rtn3	Dhx30	Eif4a2	Inpp4b	Ptpn22	H2-Ob	Pak2
Rundc3b	Dhx33	Eif4a3	Inpp5b	Ptpn4	H2-Q4	Palld
Runx1	Dhx35	Eif4b	Inpp5d	Ptpn6	H2-Q6	Pam
Rxra	Dhx36	Eif4e	Insig1	Ptpn7	H2-Q7	Pank3
S100a10	Dhx40	Eif4e2	Insig2	Ptprc	H2-T22	Papola
S1pr1	Dhx8	Eif4ebp1	Insr	Ptpre	H2-T23	Papolg
Sacm1l	Dhx9	Eif4ebp2	Ints11	Pum1	H2ax	Parva
Sacs	Diaph1	Eif4enif1	Ints12	Pum2	H2az1	Patl1
Samhd1	Diaph2	Eif4g1	Ints2	Pura	H2az2	Pawr
Sar1b	Diaph3	Eif4g3	Ints6	Purb	H3c6	Paxbp1
Saraf	Dido1	Eif4h	Ints7	Pus10	H3f3a	Paxip1
Sart3	Dimt1	Eif5	Ip6k1	Pwp1	H3f3b	Pbrm1
Sash3	Dip2a	Eif5a	Ipcef1	Pym1	H4c4	Pbx1
Satb1	Dip2b	Eif5a2	Ipo11	Qars	H4c9	Pbx3
Scaf11	Dipk1b	Eif5b	Ipo7	R3hdm1	H4f16	Pcbp1
Scaf8	Dipk2a	Elavl1	Ipo9	Rab10	Hadh	Pcbp2
Scamp2	Dis3	Elf1	Iqgap1	Rab11b	Hadhb	Pcdh18
Scarb2	Dkc1	Elf2	Iqgap2	Rab12	Hat1	Pcdh7
Scd2	Dkk1	Elf4	Ireb2	Rab14	Haus2	Pcf11
Sco1	Dlat	Elk1	Irf1	Rab1b	Hbp1	Pclaf
Sdcbp	Dlc1	Elk3	Irf2	Rab21	Hcfc1	Pcmtd1
Sdf4	Dld	Elk4	Irf2bp2	Rab35	Hcls1	Pcna
Sec14l1	Dleu7	Elmo1	Irf2bpl	Rab5c	Hdac1	Pcnx4
Sec22a	Dlg1	Elmo2	Irf4	Rab7	Hdac3	Pcyt1a
Sec22c	Dlg4	Elmsan1	Irf9	Rab8b	Hdac7	Pdap1
Sec24b	Dlgap5	Eloa	Irgm2	Rabep1	Hdgf	Pdcd10
Sec24c	Dlst	Eloc	Irs2	Rabgap1	Heatr1	Pdcd11
Sec24d	Dmac2	Elovl5	Isca1	Rac1	Heca	Pdcd7
Sec62	Dmxl1	Elovl6	Isg20l2	Rac2	Hectd1	Pdcl3
Secisbp2l	Dnaja1	Elp2	Isoc2a	Rad21	Hectd4	Pde4b
Seh1l	Dnaja2	Elp3	Ist1	Rad23b	Heg1	Pde7a
Sel1l	Dnaja3	Emb	Itch	Rae1	Helb	Pdgfra
Selenof	Dnajb1	Emc2	Itfg1	Rai1	Hells	Pdhx
Sell	Dnajb11	Emc6	Itga4	Ralgapb	Helz2	Pdia4
Selplg	Dnajb12	Emc7	Itgal	Ramac	Hemgn	Pdia6
Sem1	Dnajb14	Emd	Itgav	Ran	Herc3	Pdlim5
Sema4b	Dnajb4	Emg1	Itgb1	Ranbp1	Herc4	Pdlim7
Sema4d	Dnajb9	Eml4	Itgb2	Ranbp3	Herpud1	Pdpk1
Senp3	Dnajc1	Emp1	Itgb3	Ranbp9	Herpud2	Pds5a
Senp7	Dnajc10	Emsy	Itk	Rap1b	Hes5	Pds5b
Sephs1	Dnajc13	Enc1	Itm2b	Rap2b	Hexb	Pdzd8
Septin11	Dnajc15	Enpp4	Itm2c	Rapgef2	Hexim1	Pdzrn3
Septin7	Dnajc16	Ensa	Itpk1	Rapgef6	Hilpda	Peak1
Septin9	Dnajc21	Entpd5	Itpkb	Rara	Hinfp	Peg10
Serbp1	Dnajc3	Entpd7	Itpr1	Rasa1	Hint1	Pfdn2
Serinc1	Dnajc5	Entr1	Itprid2	Rasa2	Hip1r	Pfn1
Serinc3	Dnajc7	Eny2	Itpripl1	Rasa3	Hipk1	Pgam1
Sertad3	Dnajc8	Ep300	Itsn2	Rasgrp1	Hipk2	Pgk1
Sesn1	Dnajc9	Ep400	Ivns1abp	Rassf3	Hipk3	Pgrmc2
Sesn3	Dnal1	Epb41	Iws1	Rbbp4	Hivep1	Phactr4
Set	Dnm1l	Epb41l2	Izumo1r	Rbbp5	Hivep2	Phf10
Setd2	Dnm2	Epc1	Jade2	Rbbp8	Hivep3	Phf12
Setd4	Dnmbp	Epc2	Jagn1	Rbl1	Hjurp	Phf13
Setd7	Dnmt1	Epg5	Jak1	Rbm22	Hk2	Phf2
Setx	Dnmt3a	Epm2aip1	Jak2	Rbm25	Hmbox1	Phf20
Sf3a3	Dnttip2	Eps15	Jarid2	Rbm26	Hmga1	Phf3
Sf3b1	Dock10	Eps15l1	Jcad	Rbm27	Hmgb1	Phf5a
Sf3b4	Dock11	Eps8	Jmjd1c	Rbm3	Hmgb2	Phip
Sfswap	Dock2	Epsti1	Jmjd4	Rbm33	Hmgb3	Phldb2
Sft2d2	Dock5	Erap1	Jpt1	Rbm39	Hmgcr	Phlpp1
Sgk1	Dock8	Erbin	Jpt2	Rbm5	Hmgcs1	Phlpp2
Sgk3	Dok2	Ercc6l2	Jun	Rbm7	Hmgn1	Pi4k2a
Sgms1	Dolpp1	Erg28	Junb	Rbms1	Hmgn2	Pias3
Sgo1	Donson	Ergic2	Jund	Rbms2	Hmgn3	Pik3c2b
Sh2b1	Dop1a	Eri1	Kansl1	Rbpj	Hmgxb3	Pik3ca
Sh3bgrl3	Dot1l	Eri2	Kantr	Rc3h1	Hmgxb4	Pik3cb
Sh3bp2	Dpagt1	Erich1	Kat5	Rc3h2	Hmmr	Pik3r1
Sh3bp5	Dph3	Erlin2	Kat6a	Rchy1	Hnrnpa0	Pip4p1
Sh3kbp1	Dpp4	Ermp1	Kat6b	Rcl1	Hnrnpa1	Pip5k1a
Shisa5	Dpp8	Ero1l	Kat7	Rcn1	Hnrnpa2b1	Pja2
Shprh	Dpy19l1	Erp44	Katnbl1	Rdx	Hnrnpa3	Pkd2
Sik3	Dpy19l3	Errfi1	Kbtbd11	Rel	Hnrnpab	Pkdcc
Sin3a	Dpy19l4	Esco1	Kcnab2	Relch	Hnrnpc	Pkig
Skil	Dpy30	Esco2	Kcnn4	Rer1	Hnrnpd	Pkn2
Skp1a	Dpysl2	Esf1	Kctd17	Rere	Hnrnpdl	Pkp4
Sla	Dr1	Espl1	Kctd2	Resf1	Hnrnph1	Plagl1
Slbp	Dram2	Esyt1	Kctd20	Rest	Hnrnph2	Plagl2
Slc20a1	Drap1	Esyt2	Kctd6	Retreg1	Hnrnpk	Plcb3
Slc23a2	Drg1	Etaa1	Kdelr1	Rfc1	Hnrnpl	Plec
Slc25a14	Dse	Etf1	Kdm1b	Rfx3	Hnrnpm	Plekhm2
Slc25a16	Dstyk	Etfbkmt	Kdm2a	Rfx7	Hnrnpr	Plk1
Slc25a3	Dtl	Etfdh	Kdm2b	Rgmb	Hnrnpu	Plk2
Slc25a32	Dtnb	Etnk1	Kdm3a	Rgp1	Hnrnpul1	Plod2
Slc25a36	Dtx3l	Ets1	Kdm4a	Rgs1	Hook1	Plod3
Slc25a37	Dtymk	Ets2	Kdm4c	Rhoa	Hook3	Plp2
Slc27a4	Dusp1	Etv3	Kdm5a	Rhoh	Hp1bp3	Plpp3
Slc30a4	Dusp10	Etv6	Kdm5b	Ric1	Hpcal1	Plscr1
Slc30a5	Dusp11	Evl	Kdm5c	Rictor	Hprt	Plxna1
Slc30a7	Dusp12	Ewsr1	Kdm7a	Rif1	Hps3	Plxnb2
Slc33a1	Dusp2	Exo1	Khdc4	Riox1	Hs2st1	Pmaip1
Slc35b3	Dusp22	Exoc2	Khdrbs1	Ripk1	Hs3st1	Pmp22
Slc35e3	Dusp4	Exoc4	Khnyn	Ripor2	Hsbp1	Pmpca
Slc38a1	Dusp5	Exoc5	Khsrp	Rlim	Hsd17b11	Pnisr
Slc38a2	Dusp6	Exoc6	Kif11	Rnf10	Hsd17b12	Pnn
Slc39a10	Dusp7	Exoc8	Kif15	Rnf115	Hsd17b7	Pnrc1
Slc39a14	Dut	Exosc1	Kif18a	Rnf138	Hsf2	Pnrc2
Slc39a9	Dvl2	Exosc3	Kif20a	Rnf144a	Hsp90aa1	Polb
Slc41a1	Dvl3	Exosc7	Kif20b	Rnf145	Hsp90ab1	Pold3
Slc43a2	Dync1h1	Exosc8	Kif21b	Rnf169	Hspa13	Poldip3
Slc44a2	Dync1i2	Ext1	Kif2a	Rnf187	Hspa14	Polg
Slc6a6	Dync1li1	Eya3	Kif2c	Rnf19a	Hspa5	Polr1c
Slc7a1	Dynll1	Ezh2	Kif5b	Rnf19b	Hspa9	Polr2a
Slc9a3r1	Dynll2	Ezr	Kifc1	Rnf2	Hspd1	Polr2e
Slk	Dynlrb1	F2r	Kifc5b	Rnf41	Hspe1	Polr2m
Sltm	Dyrk1a	F2rl1	Kin	Rnf44	Hsph1	Polr3f
Smad3	Dyrk2	F8a	Klf13	Rnf7	Htra2	Pou2f1
Smad4	Dyrk3	Faf2	Klf2	Rngtt	Huwe1	Ppa1
Smad7	Dzip3	Faim	Klf3	Rock1	Hvcn1	Ppan
Smarca5	E130309D02Rik	Fam102a	Klf6	Rock2	Hyou1	Ppfia1
Smc2	E2f1	Fam104a	Klf7	Rora	Iars	Ppfibp1
Smc4	E2f2	Fam107b	Klf9	Rpa1	Ibtk	Ppia
Smchd1	E2f3	Fam111a	Klhdc2	Rpe	Icam1	Ppil1
Smg1	E2f4	Fam114a2	Klhl12	Rpf1	Ice1	Ppil4
Smu1	E2f6	Fam117a	Klhl18	Rpl18a	Id1	Ppm1b
Smurf1	E2f7	Fam117b	Klhl20	Rpl22l1	Id2	Ppp1ca
Smurf2	E2f8	Fam120a	Klhl21	Rpl27a	Id3	Ppp1cb
Snap29	Eaf1	Fam120c	Klhl24	Rpl39	Idh3a	Ppp1r10
Snapc1	Ebag9	Fam122b	Klhl28	Rpl41	Ids	Ppp1r12a
Snip1	Ebi3	Fam126a	Klhl9	Rpl7l1	Ier2	Ppp1r15b
Snrpb	Ebna1bp2	Fam126b	Kmt2a	Rpl9	Ier3	Ppp1r18
Sntb1	Ece1	Fam129a	Kmt2b	Rps12	Ier5	Ppp1r2
Sntb2	Ech1	Fam133b	Kmt2c	Rps13	Ifi203	Ppp1r9b
Snx1	Echdc1	Fam160b1	Kmt2d	Rps18	Ifi209	Ppp2r2a
Snx13	Echs1	Fam162a	Kmt2e	Rps28	Ifngr1	Ppp2r5e
Snx14	Ect2	Fam168b	Kmt5a	Rps3	Ifrd1	Ppp4c
Snx27	Edc3	Fam169b	Kmt5b	Rps6ka3	Ift140	Ppp4r2
Snx5	Edem1	Fam172a	Knl1	Rpsa	Ik	Ppp4r3b
Soat1	Edem3	Fam174a	Knop1	Rpusd4	Ikzf1	Ppp5c
Socs1	Edf1	Fam189b	Kpna1	Rras2	Ikzf3	Ppp6c
Socs2	Edrf1	Fam193a	Kpna3	Rreb1	Il10	Pptc7
Socs3	Eea1	Fam199x	Kpna4	Rrp1b	Il10rb	Prc1
Socs4	Eed	Fam210a	Kpnb1	Rsbn1	Il16	Prdx1
Socs7	Eef1a1	Fam214a	Krcc1	Rsf1	Il17ra	Prkaa1
Son	Eef1aknmt	Fam219a	Krit1	Rsl24d1	Il21r	Prkab1
Sorl1	Eef1b2	Fam222b	Krr1	Rsrp1	Il2ra	Prkaca
Sos2	Eef1e1	Fam241a	Lamp1	Rtf1	Il2rb	Prkacb
Sp1	Eef2	Fam3c	Lamtor1	Rtn3	Il4ra	Prkag1
Sp2	Eefsec	Fam43a	Lamtor3	Rundc3b	Il6st	Prkar1a
Sp3	Efcab14	Fam49a	Laptm4a	Runx1	Ilf2	Prkar2a
Sp4	Efhd2	Fam49b	Laptm5	Runx2	Ilk	Prkci
Spag9	Efna4	Fam53a	Larp1	Runx3	Ilrun	Prpf19
Spast	Efr3a	Fam53c	Larp4b	Rwdd4a	Immt	Prpf38a
Spata2	Eftud2	Fam76a	Lars2	Rxra	Impa1	Prpf4
Spcs2	Egln1	Fam76b	Lasp1	S1pr1	Impact	Prpf40a
Spen	Egln3	Fam78a	Lat	S1pr4	Impad1	Prpf8
Spidr	Egr1	Fam83d	Lats1	Sacm1l	Incenp	Prpsap2
Spin1	Egr3	Fam8a1	Lbh	Sacs	Inf2	Prr11
Spn	Ehd4	Fam91a1	Lbr	Sae1	Ing1	Prr12
Spop	Ehmt1	Fam98a	Lck	Samhd1	Ing3	Prr3
Sptbn1	Ei24	Fancd2	Lcp1	Samsn1	Ino80	Prrc1
Sptssa	Eid1	Fancm	Lcp2	Sar1b	Ino80d	Prrc2b
Spty2d1	Eif1	Far1	Ldb1	Saraf	Inpp4a	Prrc2c
Srebf2	Eif1a	Farsa	Ldha	Sarnp	Inpp4b	Prrx1
Srek1	Eif1ad	Farsb	Lef1	Sart3	Inpp5b	Prss23
Srek1ip1	Eif1ax	Fas	Lemd3	Sash3	Inpp5d	Psap
Srgn	Eif1b	Fasn	Leng8	Sat1	Insig1	Psat1
Sri	Eif2a	Fastk	Leprotl1	Satb1	Insig2	Psip1
Srp68	Eif2ak1	Fastkd3	Lfng	Sbds	Insr	Psmd1
Srpk1	Eif2ak2	Fbrs	Lgals1	Sbno1	Ints11	Psmd11
Srrm2	Eif2ak3	Fbrsl1	Lif	Scaf11	Ints12	Psmd7
Srsf1	Eif2ak4	Fbxl12	Lig1	Scaf8	Ints2	Psme3
Srsf10	Eif2b3	Fbxl14	Lig4	Scamp2	Ints6	Psme4
Srsf11	Eif2b5	Fbxl17	Limd1	Scarb2	Ints7	Pspc1
Srsf2	Eif2d	Fbxl20	Limd2	Scd2	Ip6k1	Ptbp1
Srsf3	Eif2s1	Fbxl3	Lin54	Scml4	Ipmk	Ptbp2
Srsf5	Eif2s2	Fbxl4	Lin7c	Sco1	Ipo5	Ptbp3
Srsf6	Eif2s3x	Fbxl5	Lin9	Sdad1	Ipo7	Ptch1
Srsf7	Eif2s3y	Fbxo11	Lipa	Sdc4	Ipo8	Pten
Ssbp2	Eif3a	Fbxo21	Lman2	Sdcbp	Iqgap1	Ptges3
Ssbp3	Eif3b	Fbxo22	Lmnb1	Sdf4	Iqsec1	Ptgs1
Ssh1	Eif3c	Fbxo25	Lnpep	Sec11a	Irak1	Ptgs2
Ssh2	Eif3d	Fbxo28	Lpcat3	Sec22a	Irak2	Ptk2b
Ssna1	Eif3h	Fbxo3	Lpin1	Sec22c	Ireb2	Ptk7
Ssr3	Eif3j1	Fbxo32	Lpin2	Sec23ip	Irf1	Ptma
St13	Eif3l	Fbxo33	Lpxn	Sec24c	Irf2	Ptms
St6gal1	Eif4a1	Fbxo34	Lratd2	Sec24d	Irf2bp2	Ptn
St8sia4	Eif4a2	Fbxo38	Lrba	Sec62	Irf2bpl	Ptp4a2
Stag1	Eif4a3	Fbxo45	Lrch1	Sec63	Irf4	Ptpn11
Stag2	Eif4b	Fbxo48	Lrch3	Secisbp2l	Irf5	Ptpn12
Stat1	Eif4e	Fbxo5	Lrig1	Seh1l	Irgm1	Ptpn13
Stat5b	Eif4e2	Fbxo8	Lrig2	Sel1l	Irgq	Ptpn4
Stil	Eif4ebp1	Fbxo9	Lrmp	Selenof	Irs2	Ptprf
Stk17b	Eif4ebp2	Fbxw11	Lrp12	Selenok	Isca1	Ptprj
Stk24	Eif4enif1	Fbxw2	Lrp6	Selenot	Isca2	Ptprs
Stk38	Eif4g1	Fbxw7	Lrp8	Sell	Isg20l2	Ptrh2
Stk4	Eif4g2	Fcho2	Lrrc1	Selplg	Isoc2a	Ptx3
Stradb	Eif4g3	Fchsd2	Lrrc58	Sema4b	Ist1	Pum1
Strn	Eif4h	Fdx1	Lrrc59	Sema4d	Itch	Pum2
Strn4	Eif5	Fech	Lrrc61	Senp3	Itfg1	Purb
Sub1	Eif5a	Fem1b	Lrrc8c	Senp7	Itga4	Pus10
Suclg1	Eif5a2	Fem1c	Lrrfip1	Sephs1	Itgal	Pwp1
Suclg2	Eif5b	Fen1	Lsm12	Septin7	Itgav	Pxdn
Sufu	Eif6	Fermt3	Lsm14a	Septin9	Itgb1	Qars
Sun2	Eipr1	Fgf13	Lsm14b	Serbp1	Itgb2	Qk
Supt16	Elac1	Fgf9	Lsm2	Serinc1	Itgb3	Qrich1
Suz12	Elavl1	Fgfr1op	Lsm3	Serinc3	Itm2b	Qtrt2
Syne3	Elf1	Fgfr1op2	Lsm4	Sertad3	Itm2c	R3hdm1
Szt2	Elf2	Fgl2	Lsm8	Sesn1	Itpk1	R3hdm4
Tab1	Elf4	Fhl3	Lsp1	Sesn3	Itpkb	Rab11b
Tacc3	Elk1	Fhod1	Lss	Set	Itpr1	Rab14
Tada1	Elk3	Filip1l	Lta	Setd1b	Itprid2	Rab1a
Taf1	Elk4	Fip1l1	Ltb	Setd3	Itsn2	Rab1b
Taf10	Ell	Fis1	Ltn1	Setd5	Ivns1abp	Rab21
Taf11	Ell2	Fkbp1a	Luc7l2	Setd7	Iws1	Rab2a
Taf2	Elmo1	Fkbp3	Luc7l3	Setx	Jade1	Rab5b
Taf4	Elmo2	Fkbp5	Ly6a	Sf1	Jade2	Rab5c
Taf5l	Elmod2	Fkrp	Ly6c1	Sf3b1	Jak1	Rab6a
Tagap	Elmsan1	Flcn	Ly6c2	Sf3b3	Jak2	Rab7
Taok1	Eloa	Fli1	Ly6e	Sf3b4	Jarid2	Rabep1
Taok3	Elob	Flna	Ly75	Sft2d2	Jmjd1c	Rabgap1
Tapbp	Eloc	Flot2	Lypla2	Sfxn3	Josd1	Rabl2
Tardbp	Elovl1	Fmnl1	Lysmd3	Sgk1	Jpt1	Rac1
Tasor	Elovl5	Fmnl3	Lysmd4	Sgk3	Jpt2	Rad1
Tasp1	Elovl6	Fmo5	Lyst	Sgms1	Jtb	Rad21
Tbc1d15	Elp1	Fmr1	M6pr	Sh2b1	Jun	Rad23b
Tbc1d22b	Elp2	Fn3krp	Macf1	Sh2d1a	Junb	Rai1
Tbcel	Elp3	Fnbp1	Macroh2a1	Sh2d2a	Jund	Ralgapb
Tbl1x	Emb	Fnbp4	Mad2l1	Sh2d3c	Kansl1	Ran
Tbl1xr1	Emc10	Fndc3a	Madd	Sh3bgrl3	Kansl2	Ranbp1
Tbp	Emc3	Fnip1	Maea	Sh3bp2	Kars	Ranbp2
Tbpl1	Emc6	Fopnl	Mafk	Sh3kbp1	Kat5	Ranbp3
Tceanc	Emc7	Fos	Magoh	Sh3pxd2a	Kat6a	Ranbp9
Tcf12	Emd	Fosl2	Magt1	Shank1	Kat6b	Rap1b
Tcf7	Emg1	Foxj2	Mak16	Shisa5	Kat7	Rapgef2
Tctn3	Emilin2	Foxj3	Malsu1	Shprh	Kat8	Rapgef6
Tent4a	Eml2	Foxk1	Malt1	Sidt2	Kbtbd2	Rarg
Tent5a	Eml4	Foxn2	Maml2	Sik3	Kbtbd7	Rasa2
Tent5c	Eml5	Foxn3	Man1a	Sike1	Kcmf1	Rassf8
Tes	Emp1	Foxo1	Man1a2	Skil	Kcnab2	Rbbp4
Tespa1	Emsy	Foxo3	Man1c1	Skp1a	Kcnn4	Rbbp5
Tet2	Enah	Foxp1	Man2a1	Sla	Kctd10	Rbbp7
Tet3	Enc1	Fpgt	Man2b1	Slamf1	Kctd12	Rbfox2
Tex261	Endou	Frat1	Manea	Slbp	Kctd20	Rbl1
Tfap4	Eno1	Frat2	Manf	Slc23a2	Kctd6	Rbm22
Tfdp1	Enpp4	Frg1	Map2k1	Slc25a14	Kctd9	Rbm25
Tfrc	Ensa	Frmd4a	Map3k1	Slc25a16	Kdelr1	Rbm26
Tgfbr1	Entpd5	Frmd6	Map3k2	Slc25a3	Kdelr2	Rbm27
Tgfbr2	Entpd7	Frmd8	Map3k3	Slc25a30	Kdm1b	Rbm28
Tgfbr3	Entr1	Frs2	Map3k4	Slc25a36	Kdm2b	Rbm3
Tgoln1	Eny2	Fry	Map3k5	Slc25a42	Kdm3a	Rbm33
Thoc2	Eomes	Fryl	Map3k7	Slc30a4	Kdm4a	Rbm39
Thy1	Ep300	Fsd1l	Map3k8	Slc30a5	Kdm5a	Rbm45
Tigd3	Ep400	Fth1	Map4	Slc30a7	Kdm5c	Rbm5
Timm29	Epb41	Ftl1	Map4k4	Slc33a1	Kdm5d	Rbm7
Timm44	Epb41l2	Fubp1	Map4k5	Slc35b3	Kdm6a	Rbms1
Tiprl	Epc1	Fubp3	Map7	Slc35d1	Kdm6b	Rbms2
Tle4	Epc2	Fundc1	Map7d1	Slc35e2	Kdm7a	Rbpj
Tm2d1	Epg5	Furin	Mapk1	Slc35e3	Khdc4	Rc3h1
Tm2d3	Epm2aip1	Fus	Mapk14	Slc38a1	Khdrbs1	Rc3h2
Tm9sf2	Epn1	Fut11	Mapk1ip1l	Slc38a2	Khnyn	Rchy1
Tm9sf3	Eprs	Fxn	Mapk9	Slc39a10	Khsrp	Rcl1
Tmc8	Eps15	Fxr1	Mapre1	Slc39a14	Kif11	Rcn1
Tmco1	Eps15l1	Fxr2	Mapre2	Slc39a6	Kif14	Rcn2
Tmed7	Eps8	Fxyd5	Marchf6	Slc41a1	Kif15	Rcor1
Tmed9	Epsti1	Fyb	Marchf7	Slc44a2	Kif16b	Rdx
Tmem104	Erap1	Fyn	Marf1	Slc6a6	Kif18b	Reep3
Tmem109	Erbin	Fyttd1	Mark2	Slc7a1	Kif20b	Relch
Tmem123	Erc1	Fzr1	Mast3	Slc9a6	Kif21b	Rer1
Tmem127	Ercc6l2	G0s2	Mast4	Slfn5	Kif23	Rere
Tmem129	Erf	G2e3	Mat2a	Slk	Kif2a	Resf1
Tmem131	Erg28	G3bp1	Mat2b	Smad2	Kif5b	Rest
Tmem165	Ergic1	G3bp2	Matr3	Smad3	Kifc1	Rfc1
Tmem168	Ergic2	G6pdx	Mau2	Smad4	Klc1	Rfx3
Tmem170b	Eri1	Gabarap	Mavs	Smad7	Klf13	Rfx7
Tmem192	Eri2	Gabarapl1	Max	Smap2	Klf2	Rgs12
Tmem222	Erich1	Gabbr1	Maz	Smarca5	Klf3	Rhbdf1
Tmem248	Erlin2	Gabpa	Mbd2	Smarcd2	Klf6	Rheb
Tmem30a	Ermp1	Gabpb1	Mbd5	Smc2	Klf7	Rhoa
Tmem33	Ero1l	Gabpb2	Mbip	Smc4	Klf9	Rhot1
Tmem50a	Erp29	Gadd45g	Mbnl1	Smchd1	Klhdc2	Ric1
Tmem59	Erp44	Gak	Mboat1	Smg1	Klhl12	Rictor
Tmem64	Errfi1	Galk2	Mboat7	Smg8	Klhl21	Rif1
Tmem68	Esco1	Galnt1	Mbp	Smim15	Klhl24	Riok2
Tmod3	Esco2	Galnt11	Mbtps1	Smndc1	Klhl28	Ripk4
Tmpo	Esf1	Galnt12	Mcl1	Smurf2	Klhl5	Ripor2
Tmsb4x	Espl1	Galnt6	Mcm2	Snap29	Klhl6	Rlim
Tmub2	Esrra	Galnt7	Mcm3	Snapc1	Klhl9	Rnd3
Tmx1	Esyt1	Ganab	Mcm4	Snip1	Kmt2a	Rnf10
Tmx3	Esyt2	Gapvd1	Mcm5	Sntb1	Kmt2b	Rnf115
Tnf	Etaa1	Gar1	Mcm6	Sntb2	Kmt2c	Rnf169
Tnfaip1	Etf1	Gart	Mcmbp	Snx1	Kmt2d	Rnf187
Tnfaip3	Etfa	Gas2l3	Mdc1	Snx13	Kmt2e	Rnf19a
Tnfrsf10b	Etfdh	Gata3	Mdfic	Snx14	Kmt5a	Rnf2
Tnfrsf18	Etnk1	Gatad1	Mdh1	Snx5	Kmt5b	Rnf213
Tnfrsf25	Ets1	Gatad2a	Mdm2	Soat1	Kpna1	Rnf216
Tnfrsf26	Ets2	Gatad2b	Mdm4	Socs1	Kpna3	Rnf227
Tnfrsf4	Etv3	Gatd1	Med1	Socs2	Kpna4	Rnf24
Tnfsf14	Etv5	Gbe1	Med13	Socs3	Kpna6	Rnf4
Tnik	Etv6	Gbp2	Med13l	Socs4	Kpnb1	Rnf41
Tnip1	Evi2	Gcc2	Med14	Socs6	Kras	Rnf7
Tnks2	Evl	Gclc	Med17	Socs7	Krit1	Rock1
Tnpo1	Ewsr1	Gclm	Med18	Son	Krr1	Rock2
Tnpo3	Exo1	Gdap2	Med19	Sos2	L3mbtl3	Rpa3
Tomm22	Exoc2	Gdi2	Med23	Sp1	Lamp1	Rpf1
Tomm70a	Exoc4	Gem	Med4	Sp100	Lamp2	Rpl12
Top1	Exoc5	Gfi1	Med6	Sp110	Lamtor1	Rpl22l1
Top2b	Exoc6	Gfod1	Mef2a	Sp2	Lamtor3	Rpl32
Tor1aip2	Exoc8	Gfpt1	Mef2d	Sp3	Lamtor5	Rpl39
Tpm4	Exog	Gga3	Melk	Sp4	Lap3	Rpl41
Tpp2	Exosc1	Ggact	Men1	Spag9	Laptm4a	Rpl7l1
Tpr	Exosc2	Ggnbp2	Metap2	Spast	Laptm5	Rpl9
Tprgl	Exosc3	Ggps1	Mettl17	Spata13	Larp1	Rpn1
Tpx2	Exosc7	Ghitm	Mex3b	Spcs2	Larp4	Rpn2
Traf1	Exosc8	Gid4	Mfap1a	Spen	Larp4b	Rps18
Traf3	Ext1	Gid8	Mfhas1	Spidr	Lars2	Rps19
Trappc10	Ext2	Gigyf1	Mfn1	Spin1	Lasp1	Rps27l
Trib2	Extl3	Gigyf2	Mfsd1	Spn	Lat2	Rps3
Trim12c	Eya3	Gimap3	Mfsd14a	Sppl3	Lats1	Rps6ka3
Trim27	Ezh2	Gimap4	Mfsd14b	Sptbn1	Lax1	Rpsa
Trim30a	Ezr	Gimap6	Mfsd4b4	Sptlc2	Lbh	Rpusd4
Trim30d	F2r	Gimap8	Mga	Sptssa	Lbr	Rras2
Trim33	F2rl1	Gimap9	Mgat1	Spty2d1	Lcp1	Rreb1
Trim34a	F2rl2	Gins3	Mgat4a	Srebf1	Ldha	Rrm2
Trim56	F8a	Gipc1	Mia2	Srebf2	Ldlr	Rsl1d1
Trim59	Fads1	Git1	Mia3	Srek1	Lef1	Rsl24d1
Trip11	Fads2	Git2	Mical3	Srek1ip1	Lemd3	Rspo3
Trir	Faf2	Gkap1	Micu2	Srgn	Leng8	Rsrc2
Trit1	Faim	Glb1	Midn	Sri	Leo1	Rsrp1
Trmo	Fam102a	Glcci1	Mier1	Srp68	Leprot	Rtf1
Trp53	Fam102b	Glg1	Mier3	Srpk1	Leprotl1	Rtn3
Trp53inp1	Fam104a	Glipr1	Mif	Srrm1	Lfng	Rtn4
Trpm7	Fam107b	Glipr2	Mindy2	Srrm2	Lgals8	Runx1
Tsc22d2	Fam110a	Glo1	Mindy3	Srsf1	Lgmn	Runx2
Tsen34	Fam111a	Glrx	Minpp1	Srsf2	Lgr4	Rxra
Tspan14	Fam117b	Gls	Mis18a	Srsf5	Lig1	S100a10
Tsr2	Fam118b	Gltp	Mki67	Srsf6	Lig4	Sacm1l
Ttll12	Fam120a	Glud1	Mknk2	Ssbp2	Limd1	Sart3
Ttyh3	Fam120c	Glul	Mkrn2	Ssbp3	Limd2	Sav1
Tubb5	Fam122b	Glyr1	Mks1	Ssh1	Limk2	Sbno1
Tubgcp3	Fam126a	Gm10521	Mlec	Ssh2	Lims1	Scaf11
Tubgcp4	Fam126b	Gm2a	Mllt10	Ssna1	Lin54	Scaf8
Tut4	Fam129a	Gm42372	Mllt3	Ssr3	Lin7c	Scai
Tvp23b	Fam133b	Gm42715	Mllt6	St13	Litaf	Scamp1
Twsg1	Fam136a	Gm527	Mlxip	St6gal1	Llgl1	Scarb2
Txndc11	Fam160a2	Gm6169	Mlycd	St8sia1	Lman1	Scd1
Txnip	Fam160b1	Gmcl1	Mmd	Stag1	Lmbrd1	Scd2
Txnrd1	Fam168a	Gmeb2	Mms22l	Stag2	Lmnb1	Scmh1
Tyro3	Fam168b	Gmfb	Mnt	Stat1	Lmo2	Sco1
Tyw3	Fam169b	Gmip	Mob1a	Stat3	Lmo4	Scpep1
U2surp	Fam172a	Gmnn	Mob1b	Stat5b	Lmo7	Scyl1
Uba2	Fam174a	Gna13	Mob3a	Stil	Lmtk2	Sdad1
Ubac2	Fam174b	Gnai2	Mob4	Stk10	Lnpep	Sdc1
Ube2a	Fam185a	Gnai3	Mogs	Stk17b	Lonrf1	Sdc4
Ube2d3	Fam193a	Gnaq	Morc3	Stk24	Lpcat1	Sdcbp
Ube2g1	Fam199x	Gnas	Mosmo	Stk38	Lpin1	Sdf4
Ube2g2	Fam20b	Gnb1	Mpdu1	Stk4	Lpin2	Sec22b
Ube2j1	Fam210a	Gng2	Mphosph6	Strn	Lpxn	Sec24a
Ube2j2	Fam219a	Gnl3	Mphosph8	Strn3	Lratd2	Sec24b
Ube2q2	Fam222b	Gnl3l	Mplkip	Strn4	Lrba	Sec24c
Ube2r2	Fam234b	Gnpda1	Mpp5	Stx11	Lrch1	Sec24d
Ube2t	Fam241a	Gnpnat1	Mpp6	Stx5a	Lrch3	Sec31a
Ube2w	Fam3c	Gnptab	Mppe1	Sub1	Lrig2	Sec61a1
Ube3c	Fam43a	Golga2	Mrfap1	Suclg2	Lrmp	Sec62
Ubn2	Fam49a	Golga3	Mrpl10	Suco	Lrp6	Sec63
Ubp1	Fam49b	Golga4	Mrpl34	Sufu	Lrp8	Secisbp2l
Ubtd2	Fam53a	Golga5	Mrpl45	Sun2	Lrrc40	Seh1l
Ubxn7	Fam53c	Golga7	Mrps14	Suox	Lrrc42	Sel1l
Ugcg	Fam57a	Golim4	Mrps23	Supt16	Lrrc47	Selenof
Uggt1	Fam76a	Golph3	Mrtfa	Susd6	Lrrc58	Selenoi
Uhmk1	Fam76b	Golph3l	Ms4a4b	Suz12	Lrrc59	Selenok
Uhrf1bp1	Fam78a	Golt1b	Ms4a4c	Sv2c	Lrrc8c	Selenon
Ulbp1	Fam83d	Gopc	Ms4a6b	Syt11	Lrrc8d	Selenot
Unc119b	Fam8a1	Gorasp2	Msantd2	Szrd1	Lrrk2	Sem1
Unc5cl	Fam91a1	Gosr1	Msantd4	Szt2	Lsm1	Sema3a
Uqcrh	Fam98a	Got1	Msi2	Tada1	Lsm12	Sema3c
Uri1	Fam98b	Gpalpp1	Msl2	Taf10	Lsm14a	Sema3d
Usf3	Fanca	Gpat4	Msl3	Taf11	Lsm14b	Sema3e
Usp1	Fancd2	Gpatch1	Msmo1	Taf1a	Lsm2	Sema3f
Usp12	Fance	Gpatch11	Msn	Taf4	Lsm4	Sema4b
Usp15	Fancf	Gpatch2	Mta2	Tagap	Lsm6	Sema6d
Usp16	Fancg	Gpatch2l	Mta3	Tagap1	Lsm8	Senp3
Usp19	Fancm	Gpatch8	Mtarc2	Tagln2	Lsp1	Senp7
Usp24	Far1	Gpbp1	Mtch2	Taok1	Ltb	Sephs1
Usp25	Farp1	Gpbp1l1	Mtdh	Taok3	Ltv1	Septin11
Usp3	Farsa	Gpcpd1	Mtf1	Tapbp	Luc7l2	Septin7
Usp34	Farsb	Gpd1l	Mtf2	Tardbp	Ly6a	Serbp1
Usp36	Fasl	Gpi1	Mtfmt	Tasor	Ly6d	Serinc1
Usp37	Fasn	Gpkow	Mthfd1l	Tasp1	Ly6e	Serp1
Usp39	Fastk	Gpr107	Mthfd2	Tbc1d10b	Ly75	Serpinb6b
Usp40	Fastkd3	Gpr132	Mtmr12	Tbc1d12	Ly86	Serpine1
Usp42	Fbrs	Gpr146	Mtmr14	Tbc1d15	Ly9	Serpinh1
Usp53	Fbxl14	Gpr171	Mtmr2	Tbc1d22b	Lyn	Sertad3
Usp7	Fbxl17	Gpr174	Mtmr3	Tbc1d23	Lypla2	Sertad4
Uspl1	Fbxl18	Gpr18	Mtmr6	Tbc1d4	Lysmd3	Set
Utrn	Fbxl20	Gpr183	Mto1	Tbcel	Lysmd4	Setd1b
Uvrag	Fbxl3	Gpr65	Mtpn	Tbl1x	Lyst	Setd2
Uxs1	Fbxl4	Gpr83	Mtrex	Tbl1xr1	Lzts2	Setd5
Vamp2	Fbxl5	Gprin3	Mtss1	Tbp	M6pr	Setd7
Vapa	Fbxo10	Gpsm2	Mxd1	Tbpl1	Macf1	Setx
Vdac2	Fbxo11	Gpx1	Mxd4	Tceanc	Macroh2a1	Sf1
Vezf1	Fbxo21	Gramd1a	Mxi1	Tcf12	Mad2l1	Sf3a3
Vhl	Fbxo22	Gramd1b	Myb	Tcf20	Madd	Sf3b1
Vopp1	Fbxo25	Gramd3	Myc	Tcf7	Maea	Sf3b2
Vps13a	Fbxo28	Gramd4	Mycbp2	Tcp11l2	Mafg	Sf3b3
Vps26b	Fbxo3	Grap	Myh9	Tctn3	Mafk	Sf3b4
Vps29	Fbxo30	Grap2	Myl6	Tent4a	Magoh	Sfpq
Vps36	Fbxo31	Grb2	Mynn	Tent5a	Magt1	Sfrp1
Vps4b	Fbxo33	Grk2	Myo1g	Tent5c	Mak16	Sfrp2
Wapl	Fbxo34	Grk6	Myo6	Tes	Malsu1	Sfswap
Wasf2	Fbxo38	Grn	Mysm1	Tet2	Malt1	Sft2d2
Wasl	Fbxo42	Grpel1	Mzt1	Tet3	Maml1	Sfxn3
Wbp11	Fbxo45	Grpel2	N4bp2	Tex261	Maml2	Sgk1
Wbp2	Fbxo46	Gsk3a	N4bp2l1	Tfap2a	Man1a	Sgms2
Wbp4	Fbxo48	Gsk3b	N4bp2l2	Tfap4	Man1a2	Sh2b1
Wdhd1	Fbxo5	Gskip	Naa15	Tfdp1	Man2a1	Sh3pxd2a
Wdr26	Fbxo7	Gspt1	Naa30	Tfrc	Man2b1	Shank1
Wdr44	Fbxo9	Gsr	Naa35	Tgfbr1	Manea	Shprh
Wdr45b	Fbxw11	Gtf2a1	Naa40	Tgfbr2	Manf	Sik3
Wdr61	Fbxw2	Gtf2a2	Naa50	Tgfbr3	Map2k1	Sin3a
Wdr82	Fbxw7	Gtf2b	Nab1	Tgoln1	Map2k3	Sipa1l1
Wdyhv1	Fcho2	Gtf2e1	Nabp1	Themis	Map2k4	Ska2
Wee1	Fchsd2	Gtf2e2	Nacc1	Thoc2	Map3k1	Ski
Wipf1	Fdft1	Gtf2h1	Nadk	Thy1	Map3k2	Skil
Wipf2	Fdx1	Gtf2h4	Naf1	Timm29	Map3k5	Skp1a
Wnk1	Fem1a	Gtf2i	Nampt	Timm44	Map3k7	Skp2
Wrn	Fem1b	Gtf3c1	Nap1l1	Tk2	Map3k8	Slbp
Wsb1	Fem1c	Gtf3c3	Nap1l4	Tle3	Map4	Slc11a2
Wwp1	Fen1	Gtf3c6	Nars2	Tle4	Map4k2	Slc16a1
Xbp1	Fermt3	Gtpbp1	Nasp	Tlk1	Map4k4	Slc1a3
Xiap	Fez2	Gtpbp2	Nbeal1	Tm2d1	Map4k5	Slc25a14
Xpo1	Fgd6	Gtpbp4	Nbr1	Tm2d3	Map7	Slc25a16
Xpo7	Fgf13	Gtpbp8	Ncapd2	Tm9sf2	Map7d1	Slc25a3
Xpr1	Fgfbp3	Gtse1	Ncapd3	Tm9sf3	Mapk1	Slc25a30
Xrn2	Fgfr1op	Gucy1a1	Ncapg	Tmed7	Mapk14	Slc25a36
Ykt6	Fgfr1op2	Gucy1b1	Ncaph	Tmem104	Mapk1ip1l	Slc25a39
Yrdc	Fgl2	Gusb	Ncaph2	Tmem106b	Mapk3	Slc25a42
Ythdc1	Fh1	Gxylt1	Ncbp1	Tmem109	Mapk6	Slc25a46
Ythdf1	Fhl2	Gzf1	Ncbp3	Tmem123	Mapk8	Slc25a51
Ythdf3	Fhl3	Gzmb	Nck1	Tmem127	Mapk9	Slc27a4
Ywhae	Fhod1	H13	Nckap1l	Tmem129	Mapkapk2	Slc2a1
Ywhag	Ficd	H1f0	Ncl	Tmem131	Mapre1	Slc30a4
Ywhaz	Fignl1	H1f4	Ncoa2	Tmem165	Mapre2	Slc30a5
Yy1	Filip1l	H2-D1	Ncoa3	Tmem167b	Marchf5	Slc30a7
Zap70	Fip1l1	H2-K1	Ncoa4	Tmem168	Marchf6	Slc33a1
Zbtb1	Fis1	H2-M3	Ncoa6	Tmem170b	Marchf7	Slc35b3
Zbtb41	Fkbp15	H2-Ob	Ncoa7	Tmem184b	Marcks	Slc35d1
Zbtb43	Fkbp1a	H2-Q4	Ncor1	Tmem192	Marcksl1	Slc35e3
Zbtb45	Fkbp3	H2-Q7	Ncor2	Tmem222	Marf1	Slc35f5
Zbtb7a	Fkbp4	H2-T23	Ncstn	Tmem248	Mark2	Slc38a1
Zc3h12a	Fkbp5	H2ac11	Ndfip1	Tmem30a	Mast3	Slc38a2
Zc3h12d	Fkbp8	H2ac4	Ndfip2	Tmem33	Mast4	Slc39a1
Zc3hav1	Fkrp	H2aj	Ndrg1	Tmem50a	Mat2a	Slc39a10
Zcchc2	Fktn	H2ax	Ndst2	Tmem59	Mat2b	Slc39a14
Zcchc8	Flcn	H2az1	Ndufa4	Tmem64	Matr3	Slc3a2
Zdhhc18	Fli1	H2az2	Ndufa6	Tmf1	Mau2	Slc41a1
Zdhhc20	Flna	H2bc4	Ndufa7	Tmod3	Max	Slc44a1
Zdhhc21	Flot2	H2bc6	Ndufab1	Tmpo	Maz	Slc4a7
Zfp106	Flvcr1	H2bc9	Ndufc2	Tmsb10	Mbd1	Slc6a6
Zfp131	Fmnl1	H3c1	Ndufv1	Tmsb4x	Mbd2	Slc7a1
Zfp169	Fmr1	H3c14	Nedd1	Tmub2	Mbip	Slc7a2
Zfp212	Fn3krp	H3c6	Nedd9	Tmx1	Mbnl1	Slc7a5
Zfp217	Fnbp1	H3f3a	Nek7	Tmx3	Mbnl2	Slc9a3r1
Zfp235	Fnbp4	H3f3b	Nek9	Tnf	Mboat7	Slf2
Zfp26	Fndc3a	H4c1	Nelfb	Tnfaip1	Mbp	Slit2
Zfp280b	Fnip1	H4c2	Nemf	Tnfaip3	Mbtd1	Slk
Zfp280d	Fnip2	H4c4	Nemp1	Tnfrsf14	Mbtps2	Smad2
Zfp292	Fntb	Hacd3	Nepro	Tnfrsf18	Mcl1	Smad7
Zfp317	Fopnl	Hace1	Net1	Tnfrsf25	Mcm2	Smarca5
Zfp36	Fos	Hadh	Neurl1b	Tnfrsf4	Mcm3	Smarcad1
Zfp367	Fosl2	Hadhb	Neurl3	Tnfsf14	Mcm4	Smarcd2
Zfp36l2	Foxj2	Hars2	Nf1	Tnfsf8	Mcm5	Smc2
Zfp451	Foxj3	Hat1	Nfat5	Tnik	Mcm6	Smc3
Zfp608	Foxk1	Haus2	Nfatc1	Tnip1	Mcmbp	Smc4
Zfp654	Foxk2	Hbegf	Nfatc2	Tnks2	Mcph1	Smc6
Zfp655	Foxn2	Hbp1	Nfatc2ip	Tnpo1	Mctp2	Smchd1
Zfp667	Foxn3	Hbs1l	Nfatc3	Tnpo3	Mcu	Smg1
Zfp715	Foxo1	Hcfc1	Nfe2l2	Tnrc6b	Mdfic	Smndc1
Zfp758	Foxo3	Hcfc2	Nfil3	Tomm22	Mdh1	Smoc2
Zfp770	Foxp1	Hcls1	Nfkb1	Tomm70a	Mdm2	Smurf2
Zfp867	Foxp4	Hdac1	Nfkbia	Top1	Mdm4	Snai1
Zfp869	Foxred1	Hdac2	Nfkbid	Top2b	Mdn1	Snap29
Zfp871	Foxred2	Hdac3	Nfkbiz	Topbp1	Meaf6	Snhg11
Zfr	Fpgt	Hdac4	Nfx1	Tor1aip2	Mecp2	Snrpb
Zfx	Frat1	Hdac7	Nfya	Tox4	Med1	Snrpd3
Zkscan1	Frat2	Hdac8	Nfyb	Tpm3	Med12	Sntb2
Zkscan17	Frg1	Hdgf	Nhlrc2	Tpm4	Med13	Snu13
Zmat2	Frmd4a	Hdgfl2	Nin	Tpr	Med13l	Snx12
Zmiz2	Frmd6	Hdgfl3	Nip7	Tpra1	Med14	Snx13
Zmpste24	Frmd8	Hdlbp	Nipbl	Tprgl	Med23	Snx18
Zmym2	Frs2	Heatr1	Nisch	Traf1	Med24	Snx25
Zmynd8	Fryl	Heca	Nktr	Traf3	Med28	Snx27
Znrf2	Fth1	Hectd1	Nlk	Trak2	Med30	Snx4
Znrf3	Ftl1	Hectd4	Nmi	Tram1	Med4	Snx5
Zxdb	Ftsj3	Heg1	Noc4l	Tram2	Med6	Snx7
Zyg11b	Fubp1	Helb	Nono	Trappc10	Mef2a	Socs1
Zzz3	Fubp3	Hells	Nop10	Trib1	Mef2c	Socs4
	Fuca2	Helz	Notch1	Trib2	Mef2d	Socs6
	Fundc1	Helz2	Notch2	Trib3	Megf9	Socs7
	Fundc2	Hemgn	Npat	Trim12c	Men1	Soga1
	Furin	Herc1	Npc1	Trim25	Metap1	Son
	Fus	Herc2	Npc2	Trim30d	Metap2	Sorbs3
	Fut11	Herc3	Npepps	Trim33	Mff	Sort1
	Fut4	Herc4	Nploc4	Trim56	Mfhas1	Sos2
	Fut7	Herpud1	Npm1	Trim59	Mfsd1	Sowahc
	Fxn	Herpud2	Nptn	Trip11	Mfsd14a	Sox12
	Fxr1	Hes5	Nr2c2	Trir	Mfsd14b	Sox4
	Fxr2	Hexb	Nr3c1	Trit1	Mfsd2a	Sp1
	Fxyd5	Hexim1	Nr4a1	Trmo	Mfsd5	Sp3
	Fyco1	Hgsnat	Nrarp	Trp53	Mga	Spag9
	Fyn	Hibadh	Nras	Trp53inp1	Mgat1	Sparc
	Fyttd1	Higd1a	Nrde2	Trpm7	Mgat4a	Spast
	Fzd5	Higd2a	Nrf1	Tsc22d2	Mgat5	Spcs2
	Fzd7	Hikeshi	Nrip1	Tspan14	Mgrn1	Spcs3
	Fzr1	Hilpda	Nrn1	Tsr2	Mia2	Specc1
	G0s2	Hinfp	Nsd1	Ttc39b	Mia3	Spidr
	G2e3	Hint1	Nsd2	Tubb5	Mib1	Spin1
	G3bp1	Hipk1	Nsd3	Tubgcp4	Micos10	Sppl3
	G3bp2	Hipk2	Nsg2	Tubgcp5	Micu2	Spred1
	G6pdx	Hipk3	Nsl1	Tut4	Mid1ip1	Spred2
	Gabarap	Hivep1	Nsrp1	Tvp23b	Midn	Spry1
	Gabarapl1	Hivep2	Nt5c3	Txndc11	Mier1	Sptbn1
	Gabbr1	Hjurp	Nt5dc1	Txnip	Mier3	Sptssa
	Gabpa	Hk1	Nub1	Tyro3	Mif	Src
	Gabpb1	Hk2	Nucks1	Tyw3	Mif4gd	Srebf1
	Gabpb2	Hmbox1	Nudt21	U2surp	Mindy2	Srebf2
	Gadd45g	Hmg20a	Nudt3	Uba2	Minpp1	Srek1
	Gak	Hmgb1	Nudt4	Ubac2	Mis18a	Srek1ip1
	Galc	Hmgb2	Nuf2	Ubash3a	Mki67	Sri
	Galk1	Hmgb3	Nufip2	Ube2a	Mknk2	Srp68
	Galk2	Hmgcr	Numa1	Ube2b	Mlec	Srpk1
	Galnt1	Hmgcs1	Nup107	Ube2d3	Mlf2	Srrm1
	Galnt11	Hmgn1	Nup153	Ube2g1	Mllt10	Srrm2
	Galnt3	Hmgn2	Nup155	Ube2g2	Mllt6	Srsf1
	Galnt6	Hmgn5	Nup160	Ube2h	Mlxip	Srsf10
	Galnt7	Hmgxb3	Nup210	Ube2q2	Mmd	Srsf2
	Gan	Hmgxb4	Nup35	Ube2w	Mms22l	Srsf3
	Ganab	Hmmr	Nup50	Ube3a	Mnt	Srsf5
	Gapvd1	Hnrnpa0	Nus1	Ube4a	Mob1a	Srsf6
	Gar1	Hnrnpa1	Nxf1	Ubfd1	Mob1b	Srsf7
	Gars	Hnrnpa2b1	Nxn	Ubl5	Mob3a	Ssb
	Gart	Hnrnpa3	Nxpe3	Ubn1	Mob4	Ssbp2
	Gas2l3	Hnrnpab	Oas3	Ubn2	Mon2	Ssbp3
	Gata3	Hnrnpc	Oaz1	Ubp1	Morc3	Ssh1
	Gatad1	Hnrnpd	Ociad1	Ubtd2	Morf4l2	Ssna1
	Gatad2a	Hnrnpdl	Oga	Ubxn2b	Mospd3	Ssr1
	Gatad2b	Hnrnpf	Ogt	Ubxn7	Mpeg1	Ssr3
	Gatm	Hnrnph1	Ola1	Ucp2	Mphosph6	Ssrp1
	Gbf1	Hnrnph2	Opa1	Ugcg	Mphosph8	St13
	Gbp2	Hnrnph3	Opa3	Uggt1	Mpp1	Stard13
	Gbp5	Hnrnpk	Orc1	Uhrf1bp1	Mpp6	Stard7
	Gbp7	Hnrnpl	Osbp	Ulk3	Mpv17	Stat3
	Gca	Hnrnpll	Osbpl2	Unc119b	Mreg	Stat5b
	Gclc	Hnrnpm	Osbpl8	Upf1	Mrfap1	Stil
	Gclm	Hnrnpr	Osm	Uqcrh	Mrpl18	Stip1
	Gcnt1	Hnrnpu	Ost4	Uri1	Mrpl34	Stk17b
	Gcsh	Hnrnpul1	Ostc	Usf3	Mrpl35	Stk35
	Gdap2	Hook1	Ostf1	Usp1	Mrpl44	Strbp
	Gdi1	Hook3	Ostm1	Usp12	Mrpl45	Strn
	Gdi2	Hopx	Otud4	Usp16	Mrpl57	Strn4
	Gem	Hp1bp3	Otud5	Usp19	Mrps14	Stt3a
	Get1	Hpcal1	Otulin	Usp24	Mrps23	Stt3b
	Get4	Hprt	Otulinl	Usp25	Mrtfa	Stx7
	Gfi1	Hps3	Oxct1	Usp3	Mrtfb	Stxbp3
	Gfm2	Hps5	Oxr1	Usp32	Ms4a1	Stxbp6
	Gfod1	Hrh2	P2ry10	Usp34	Ms4a4b	Sub1
	Gfpt1	Hs2st1	P4ha1	Usp37	Ms4a4c	Suclg2
	Gga3	Hs3st3b1	P4hb	Usp39	Ms4a6b	Sufu
	Ggact	Hsbp1	Pa2g4	Usp40	Msi2	Sulf1
	Ggnbp2	Hsd11b1	Pabpc1	Usp42	Msl2	Sun1
	Ggps1	Hsd17b12	Pafah1b1	Usp46	Msl3	Sun2
	Ggta1	Hsd17b7	Pafah1b2	Usp53	Msmo1	Supt16
	Ghitm	Hsdl1	Pag1	Usp7	Msn	Suz12
	Gid4	Hsf2	Paics	Uspl1	Mt1	Swi5
	Gid8	Hsp90aa1	Paip1	Utrn	Mt2	Syne2
	Gigyf1	Hsp90ab1	Paip2	Uvrag	Mta1	Syngap1
	Gigyf2	Hsp90b1	Paip2b	Vamp1	Mta2	Sypl
	Gimap3	Hspa13	Pak2	Vamp2	Mtarc2	Szrd1
	Gimap4	Hspa14	Pan3	Vapa	Mtch1	Szt2
	Gimap6	Hspa4	Pank3	Vasp	Mtdh	Tab2
	Gimap8	Hspa4l	Papola	Vdac1	Mtf2	Tada1
	Gimap9	Hspa5	Papolg	Vegfa	Mthfd2	Taf1
	Gins3	Hspa9	Parp1	Vezf1	Mthfsl	Taf11
	Gipc1	Hspbap1	Parp11	Vhl	Mtm1	Taf15
	Git1	Hspd1	Parp14	Vmp1	Mtmr1	Taf1d
	Git2	Hspe1	Parp4	Vopp1	Mtmr12	Taf2
	Gk	Htatsf1	Parp9	Vps13a	Mtmr14	Taf4
	Gkap1	Hus1	Patl1	Vps13c	Mtmr2	Tagap1
	Glb1	Huwe1	Paxbp1	Vps26b	Mtmr3	Tagln2
	Gle1	Hvcn1	Paxip1	Vps29	Mtmr6	Taok1
	Glg1	Hyal2	Pbrm1	Vps4b	Mtpn	Taok3
	Glipr1	Hyou1	Pcbp1	Wac	Mtss1	Tardbp
	Glipr2	Hypk	Pcbp2	Wapl	Mtx2	Tars
	Glmn	Iars	Pced1b	Wasf2	Mxd1	Tasor
	Glod4	Iars2	Pcf11	Wasl	Mxd4	Tbc1d10b
	Glrx	Ibtk	Pcgf5	Wbp2	Mycbp2	Tbc1d12
	Glrx3	Ice1	Pcif1	Wbp4	Mydgf	Tbc1d15
	Glrx5	Icos	Pclaf	Wdhd1	Myef2	Tbc1d23
	Gls	Id1	Pcm1	Wdr26	Myh9	Tbcel
	Gltp	Id2	Pcmtd1	Wdr37	Myl6	Tbk1
	Glud1	Id3	Pcmtd2	Wdr44	Mylip	Tbl1x
	Glul	Ide	Pcna	Wdr45b	Myo1e	Tbl1xr1
	Glyr1	Idh3a	Pcnp	Wdr48	Myo1f	Tbpl1
	Gm12166	Idh3b	Pcnt	Wdr61	Myo1g	Tbx15
	Gm12185	Ids	Pdap1	Wdr82	Myo5a	Tbx3
	Gm17018	Idua	Pdcd10	Wdyhv1	Myo9b	Tceal8
	Gm2a	Ier2	Pdcd11	Wipf1	Mysm1	Tceal9
	Gm42715	Ier3	Pdcd4	Wipf2	Mzt1	Tcf12
	Gm4841	Ier5	Pdcd6	Wnk1	N4bp2	Tcf21
	Gm527	Ifi203	Pdcd6ip	Wrn	N4bp2l2	Tcf3
	Gm8369	Ifi208	Pdcd7	Wsb1	Naa15	Tcf7l1
	Gmcl1	Ifi209	Pdcl	Wwp1	Naa20	Tcf7l2
	Gmeb1	Ifi27l2a	Pdcl3	Xbp1	Naa30	Tcp11l1
	Gmeb2	Ifit1bl1	Pde3b	Xiap	Naa40	Tctn3
	Gmfb	Ifit2	Pde4b	Xpo1	Naa50	Tdg
	Gmip	Ifnar1	Pde4d	Xpo7	Nab1	Tead1
	Gmnn	Ifngr1	Pde7a	Xpr1	Nacc1	Tent2
	Gmppb	Ifngr2	Pdha1	Xrn2	Nadk	Tent4a
	Gna11	Ifrd1	Pdhx	Ypel3	Nampt	Tet3
	Gna12	Ift80	Pdia3	Yrdc	Nap1l1	Tex261
	Gna13	Igf1r	Pdia4	Ythdc1	Nap1l4	Tfam
	Gnai2	Igf2r	Pdia6	Ythdf1	Nars	Tfap4
	Gnai3	Igfbp4	Pdik1l	Ythdf3	Nasp	Tfdp1
	Gnaq	Igip	Pdk1	Ywhab	Nbr1	Tfrc
	Gnas	Igsf23	Pdlim5	Ywhae	Ncapd3	Tgfb2
	Gnb1	Ik	Pdpk1	Ywhag	Ncapg2	Tgfbr2
	Gng12	Ikbkb	Pds5a	Ywhaz	Ncaph	Tgfbr3
	Gng2	Ikbkg	Pds5b	Yy1	Ncbp1	Tgoln1
	Gnl3	Ikzf1	Pdzd8	Zap70	Ncbp3	Thap2
	Gnl3l	Ikzf3	Peak1	Zbtb1	Nceh1	Thbs1
	Gnpda1	Ikzf4	Peli1	Zbtb20	Ncf1	Thoc2
	Gnpnat1	Il10ra	Pex1	Zbtb24	Nck1	Tigd3
	Gnptab	Il10rb	Pex12	Zbtb34	Nck2	Tigd5
	Golga2	Il16	Pfdn2	Zbtb41	Nckap1l	Timm29
	Golga3	Il17ra	Pfdn4	Zbtb43	Ncl	Timm44
	Golga4	Il18r1	Pfkfb3	Zbtb44	Ncoa1	Timp2
	Golga7	Il2	Pfkp	Zbtb45	Ncoa2	Timp3
	Golgb1	Il21r	Pfn1	Zbtb7a	Ncoa3	Tjp1
	Golim4	Il27ra	Pgam1	Zbtb7b	Ncoa6	Tlk1
	Golm1	Il2ra	Pggt1b	Zc3h12a	Ncoa7	Tm2d1
	Golph3	Il2rb	Pgk1	Zc3h12d	Ncor1	Tm2d3
	Golph3l	Il4ra	Pgm2	Zc3h4	Ncstn	Tm4sf1
	Golt1b	Il6ra	Pgrmc2	Zc3h7a	Ndel1	Tm7sf3
	Gopc	Il6st	Pgs1	Zcchc2	Ndfip1	Tm9sf2
	Gorasp2	Il7r	Phactr2	Zcchc8	Ndst1	Tm9sf3
	Gosr1	Ilf2	Phc2	Zdhhc17	Ndst2	Tm9sf4
	Gosr2	Ilf3	Phc3	Zdhhc20	Ndufa2	Tmbim6
	Got1	Ilk	Phf10	Zdhhc21	Ndufa4	Tmed2
	Gpalpp1	Ilkap	Phf13	Zfc3h1	Ndufa6	Tmed7
	Gpat4	Ilrun	Phf2	Zfp106	Ndufa7	Tmed9
	Gpatch1	Immt	Phf20	Zfp131	Ndufaf8	Tmeff1
	Gpatch2l	Imp3	Phf3	Zfp169	Ndufb3	Tmem104
	Gpatch8	Impa1	Phf6	Zfp207	Ndufb6	Tmem106b
	Gpbp1	Impa2	Phf8	Zfp212	Ndufs1	Tmem109
	Gpbp1l1	Impact	Phip	Zfp217	Ndufs6	Tmem120a
	Gpcpd1	Impad1	Phlpp1	Zfp235	Ndufv1	Tmem123
	Gpd1l	Impdh1	Phrf1	Zfp26	Necap1	Tmem127
	Gpd2	Inafm2	Phtf1	Zfp275	Necap2	Tmem129
	Gpi1	Incenp	Pi4k2a	Zfp280b	Nedd1	Tmem131
	Gpkow	Inf2	Pias1	Zfp280d	Nedd8	Tmem14c
	Gpr107	Ing1	Pias2	Zfp292	Nedd9	Tmem165
	Gpr132	Ing2	Pias3	Zfp317	Nek2	Tmem168
	Gpr141	Ing3	Picalm	Zfp329	Nek7	Tmem170b
	Gpr146	Ing4	Piga	Zfp36	Nek9	Tmem222
	Gpr171	Ing5	Pigt	Zfp367	Nelfa	Tmem248
	Gpr174	Ino80	Pik3c2b	Zfp36l1	Nelfb	Tmem263
	Gpr183	Ino80d	Pik3c3	Zfp36l2	Nelfcd	Tmem33
	Gpr55	Inpp1	Pik3ca	Zfp395	Net1	Tmem59
	Gpr65	Inpp4a	Pik3cb	Zfp451	Nf1	Tmem68
	Gpr68	Inpp4b	Pik3cd	Zfp592	Nf2	Tmf1
	Gprin3	Inpp5a	Pik3ip1	Zfp608	Nfat5	Tmpo
	Gps1	Inpp5b	Pik3r1	Zfp654	Nfatc1	Tmsb4x
	Gpsm1	Inpp5d	Pik3r4	Zfp667	Nfatc2	Tmtc3
	Gpsm2	Inpp5e	Pikfyve	Zfp715	Nfatc2ip	Tmx1
	Gpt2	Inpp5k	Pim1	Zfp758	Nfatc3	Tmx3
	Gramd1b	Insig1	Pim2	Zfp830	Nfe2l1	Tnc
	Gramd3	Insig2	Pimreg	Zfp867	Nfil3	Tnfaip1
	Gramd4	Insr	Pin1	Zfp869	Nfkb1	Tnfaip3
	Grap	Ints11	Pip4k2b	Zfp871	Nfkb2	Tnfrsf10b
	Grap2	Ints12	Pip4k2c	Zfr	Nfkbia	Tnfrsf12a
	Grb2	Ints13	Pip4p1	Zfx	Nfkbid	Tnip1
	Grk2	Ints14	Pip4p2	Zkscan1	Nfkbiz	Tnks
	Grk6	Ints2	Pip5k1a	Zmat3	Nfx1	Tnks2
	Grn	Ints6	Pisd	Zmiz1	Nfxl1	Tnpo1
	Grpel1	Ints6l	Pitpnc1	Zmiz2	Nfya	Tnpo3
	Grpel2	Ints7	Pkig	Zmym2	Nfyb	Tnrc18
	Grsf1	Ip6k1	Pkm	Zmynd8	Nifk	Tns3
	Gsap	Ip6k2	Pkn2	Znrf2	Nin	Tob1
	Gsk3a	Ipcef1	Pknox1	Znrf3	Nip7	Tomm22
	Gsk3b	Ipo5	Plagl2	Zranb1	Nipa2	Tomm70a
	Gskip	Ipo7	Plcg1	Zxdb	Nipal3	Top1
	Gspt1	Ipo8	Plcl1	Zyg11b	Nipbl	Top2a
	Gsr	Ipo9	Plcl2	Zzz3	Nkrf	Topbp1
	Gstcd	Iqgap1	Plec		Nktr	Tor1aip1
	Gsto1	Iqgap2	Plekha2		Nlk	Tor1aip2
	Gtf2a1	Irak2	Plekha3		Nmt2	Tpm1
	Gtf2b	Irak4	Plekha5		Noc4l	Tpm3
	Gtf2e1	Ireb2	Plekhb2		Nol10	Tpm4
	Gtf2e2	Irf1	Plekhj1		Nol8	Tra2a
	Gtf2f2	Irf2	Plekhm2		Nom1	Tra2b
	Gtf2h1	Irf2bp2	Plk1		Nono	Trabd2b
	Gtf2h4	Irf2bpl	Plk4		Nop10	Traf3
	Gtf2i	Irf4	Plod2		Notch1	Traf3ip1
	Gtf3c3	Irf9	Plp2		Notch2	Trak2
	Gtf3c4	Irgm2	Plscr1		Npat	Tram1
	Gtf3c6	Irs2	Pmaip1		Npc2	Tram2
	Gtpbp1	Isca1	Pml		Npepps	Trappc10
	Gtpbp10	Isca2	Pmpca		Nploc4	Trappc13
	Gtpbp2	Isg20l2	Pnisr		Npm1	Trib1
	Gtpbp4	Ist1	Pnn		Npm3	Trib3
	Gtpbp8	Itch	Pnpla7		Nptn	Trim23
	Gtse1	Itfg1	Pnrc1		Nr1d2	Trim44
	Gusb	Itga2	Pnrc2		Nr2c2	Trim56
	Gypc	Itga4	Polb		Nr3c1	Trim59
	Gzf1	Itga6	Pold3		Nr4a1	Trim8
	H13	Itga7	Poldip3		Nr4a2	Trio
	H1f0	Itgal	Polg		Nr4a3	Trip11
	H1f2	Itgav	Polk		Nras	Trir
	H1f4	Itgb1	Polr1c		Nrbp1	Trp53
	H2-D1	Itgb2	Polr2a		Nrde2	Trpm7
	H2-K1	Itgb3	Polr2e		Nrf1	Tsc22d1
	H2-Q4	Itgb5	Polr2j		Nrip1	Tsc22d2
	H2-Q6	Itgb7	Polr2m		Nrp2	Tsen34
	H2-Q7	Itk	Polr3e		Nrros	Tsg101
	H2ac11	Itm2a	Polr3f		Nsd1	Tspan5
	H2ac4	Itm2b	Polr3gl		Nsd3	Tsr2
	H2ac6	Itm2c	Pom121		Nsf	Ttc19
	H2aj	Itpk1	Pot1a		Nsun2	Ttc37
	H2ax	Itpkb	Pou2f1		Nt5c2	Ttc39b
	H2az1	Itpr1	Pou2f2		Nt5dc3	Ttll12
	H2az2	Itpr3	Ppa1		Nucks1	Tubb5
	H2bc4	Itprid2	Ppan		Nudc	Tubgcp3
	H2bc6	Itpripl1	Ppfia1		Nudcd3	Tubgcp4
	H2bc9	Itpripl2	Ppia		Nudt21	Tubgcp5
	H3c1	Itsn2	Ppil1		Nudt3	Tut4
	H3c13	Ivns1abp	Ppil4		Nudt4	Tvp23b
	H3c6	Iws1	Ppip5k2		Nuf2	Twist1
	H3c8	Izumo1r	Ppm1a		Nufip2	Twsg1
	H3f3a	Jade1	Ppm1b		Numa1	Txndc11
	H3f3b	Jade2	Ppm1g		Nup107	Tyro3
	H4c1	Jagn1	Ppm1h		Nup153	Tyw3
	H4c4	Jak1	Ppm1k		Nup155	Uba2
	H4c6	Jak2	Ppp1ca		Nup205	Ubap2l
	Hacd2	Jarid2	Ppp1cb		Nup210	Ube2a
	Hacd3	Jmjd1c	Ppp1cc		Nup50	Ube2b
	Hadh	Jmjd4	Ppp1r10		Nup98	Ube2c
	Hadha	Jmy	Ppp1r12a		Nus1	Ube2d1
	Hadhb	Jpt1	Ppp1r15b		Nusap1	Ube2d3
	Hars	Jpt2	Ppp1r16b		Nxf1	Ube2g1
	Hars2	Jrkl	Ppp1r18		Oaz1	Ube2g2
	Hat1	Jun	Ppp1r8		Ociad1	Ube2j1
	Haus2	Junb	Ppp1r9b		Odc1	Ube2k
	Haus4	Jund	Ppp2ca		Oga	Ube2l3
	Haus6	Kansl1	Ppp2r1a		Ogt	Ube2q2
	Hbegf	Kansl2	Ppp2r2a		Ola1	Ube2r2
	Hbs1l	Kansl3	Ppp2r5a		Olfr679	Ube2w
	Hccs	Kantr	Ppp2r5c		Opa1	Ube3a
	Hcfc1	Kat2b	Ppp2r5e		Orc1	Ubfd1
	Hcfc2	Kat5	Ppp3cb		Ormdl2	Ubp1
	Hcls1	Kat6a	Ppp4r1		Os9	Ubqln1
	Hdac1	Kat6b	Ppp4r2		Osbp	Ubqln2
	Hdac2	Kat7	Ppp4r3a		Osbpl2	Ubr3
	Hdac3	Katnbl1	Ppp4r3b		Osbpl8	Ubr5
	Hdac4	Kbtbd11	Ppp5c		Osbpl9	Ubr7
	Hdac7	Kbtbd2	Ppp6c		Ost4	Ubtd2
	Hdgf	Kcmf1	Ppp6r1		Ostc	Ubxn7
	Hdgfl2	Kcna3	Ppp6r3		Ostf1	Ugcg
	Hdgfl3	Kcnab2	Ppt2		Ostm1	Ugdh
	Hdlbp	Kcnn4	Pptc7		Otub1	Uggt1
	Heatr1	Kctd10	Prc1		Otud1	Uhrf1bp1
	Heatr3	Kctd2	Prdm4		Otud4	Ulk3
	Heca	Kctd20	Prdx1		Otud5	Unc119b
	Hectd1	Kctd6	Prelid1		Otulin	Unc50
	Hectd2	Kctd9	Prex1		Oxct1	Unc5b
	Hectd3	Kdelr1	Primpol		Oxr1	Upf1
	Hectd4	Kdelr2	Prkaa1		P2ry10	Upk1b
	Heg1	Kdm1b	Prkab1		P4hb	Upk3b
	Helb	Kdm2a	Prkaca		Pa2g4	Usf3
[truncated: 3,677 more rows]

## Sheet: Human
CD4+	CD8
AAK1	AAK1
AASDHPPT	AAMDC
ABCB10	AAMP
ABCC1	AASDHPPT
ABCC5	ABCB1
ABCD3	ABCC1
ABCE1	ABCC5
ABHD17B	ABCD2
ABHD3	ABCD3
ABHD6	ABCE1
ABI1	ABCF1
ABL2	ABHD13
ABLIM1	ABHD17B
ABRACL	ABHD2
ABT1	ABHD3
ACAA2	ABHD4
ACAP2	ABHD8
ACIN1	ABI1
ACLY	ABL1
ACOX1	ABL2
ACP1	ABLIM1
ACSF3	ABRACL
ACSL5	ACAA2
ACSS1	ACAD8
ACTB	ACAP2
ACTG1	ACIN1
ACTN4	ACLY
ACTR10	ACOT13
ACTR2	ACOX1
ACTR3	ACP1
ACTR5	ACSF3
ACYP2	ACSL4
ADA2	ACSL5
ADAM10	ACTB
ADAM17	ACTG1
ADAM19	ACTL6A
ADAR	ACTN1
ADARB1	ACTN4
ADAT2	ACTR10
ADCY7	ACTR1A
ADD1	ACTR1B
ADD3	ACTR2
ADK	ACTR3
ADNP	ACTR3C
ADO	ACTR5
ADSS2	ACVR1
AEBP2	ACVR1B
AFDN	ACYP2
AFF1	ADA2
AFF4	ADAM10
AGAP2	ADAM17
AGBL5	ADAM8
AGFG1	ADAMTS1
AGO2	ADAR
AGPAT5	ADARB1
AGPS	ADD1
AHCTF1	ADD3
AHCYL1	ADGRE5
AHNAK	ADIPOR2
AIDA	ADK
AK2	ADNP
AK6	ADRB2
AKAP10	ADSS2
AKAP11	AEBP2
AKAP13	AFAP1L2
AKIRIN1	AFF1
AKNA	AFF4
AKR1B1	AFTPH
AKR1C1	AGAP2
ALG13	AGAP3
ALG6	AGBL5
ALKBH1	AGFG1
ALKBH5	AGO2
ALOX5AP	AGPAT1
ALYREF	AGPAT5
AMD1	AHCTF1
AMFR	AHCY
AMPD3	AHDC1
ANAPC16	AHNAK
ANAPC5	AK2
ANAPC7	AK3
ANGEL2	AK6
ANK3	AKAP1
ANKDD1A	AKAP10
ANKH	AKAP11
ANKLE2	AKAP13
ANKRD10	AKAP8
ANKRD11	AKIRIN1
ANKRD12	AKNA
ANKRD13A	AKR1B1
ANKRD17	AKT2
ANKRD37	AKTIP
ANKRD40	ALG10
ANKRD44	ALG10B
ANP32A	ALG13
ANP32B	ALG5
ANP32E	ALG6
ANTXR2	ALOX5AP
ANXA1	ALYREF
ANXA2R	AMD1
ANXA5	AMFR
ANXA7	AMPD3
AP1G1	ANAPC16
AP1M1	ANAPC5
AP1S2	ANAPC7
AP2B1	ANGEL2
AP2S1	ANK3
AP3M1	ANKDD1A
AP3M2	ANKH
AP5M1	ANKLE2
APAF1	ANKRD10
APBA2	ANKRD11
APBB1IP	ANKRD12
APH1A	ANKRD13A
API5	ANKRD17
APLP2	ANKRD40
APOL6	ANKRD44
APP	ANP32A
APPBP2	ANP32B
APPL1	ANP32E
AQP3	ANXA1
AQR	ANXA11
ARAF	AOAH
ARCN1	AP1G1
ARF1	AP1M1
ARF6	AP1S1
ARFGAP3	AP1S2
ARFGEF1	AP2A1
ARFGEF2	AP2B1
ARGLU1	AP2S1
ARHGAP1	AP3B1
ARHGAP15	AP3M1
ARHGAP21	AP3M2
ARHGAP25	APAF1
ARHGAP30	APBA2
ARHGAP35	APBB1IP
ARHGAP45	APEX1
ARHGAP5	APH1A
ARHGAP9	APH1B
ARHGDIB	API5
ARHGEF1	APOBEC3G
ARHGEF18	APOH
ARHGEF6	APOL2
ARHGEF7	APOL3
ARID1A	APOL6
ARID1B	APOOL
ARID2	APPBP2
ARID3A	APPL1
ARID4A	AQP3
ARID4B	AQR
ARID5B	ARAF
ARIH1	ARAP2
ARL4C	ARCN1
ARL6IP5	AREL1
ARL6IP6	ARF1
ARL8A	ARF6
ARL8B	ARFGAP3
ARMC6	ARFGEF1
ARMCX3	ARFGEF2
ARMCX5	ARFIP1
ARMH4	ARGLU1
ARMT1	ARHGAP1
ARNT	ARHGAP15
ARNTL	ARHGAP17
ARPC1B	ARHGAP18
ARPC2	ARHGAP21
ARPC3	ARHGAP25
ARPC5	ARHGAP30
ARPP19	ARHGAP35
ARRB2	ARHGAP45
ARRDC3	ARHGAP5
ASAP1	ARHGAP9
ASF1A	ARHGDIA
ASF1B	ARHGDIB
ASH1L	ARHGEF1
ASTE1	ARHGEF18
ASXL1	ARHGEF2
ASXL2	ARHGEF3
ATF2	ARHGEF6
ATF6	ARHGEF7
ATF6B	ARID1A
ATF7IP	ARID1B
ATF7IP2	ARID2
ATG16L1	ARID4A
ATG2B	ARID4B
ATG3	ARID5B
ATG4C	ARIH1
ATM	ARL15
ATP11B	ARL4C
ATP13A3	ARL6IP5
ATP1A1	ARL8B
ATP2A2	ARMC6
ATP2A3	ARMCX5
ATP2B1	ARMH3
ATP2B4	ARMH4
ATP2C1	ARNT
ATP5F1A	ARNTL
ATP5F1B	ARPC2
ATP5F1E	ARPC3
ATP5MC2	ARPC5
ATP5MC3	ARPP19
ATP6AP2	ARRB1
ATP6V0E1	ARRB2
ATP6V1A	ARRDC3
ATP6V1G1	ARV1
ATP8B2	ASAP1
ATRX	ASB3
ATXN1	ASB7
ATXN2	ASF1A
ATXN2L	ASF1B
ATXN3	ASH1L
ATXN7L3	ASTE1
ATXN7L3B	ASTN2
AUP1	ASXL1
AUTS2	ASXL2
AVL9	ATAD1
AXIN1	ATF1
AXIN2	ATF2
AZIN1	ATF4
B2M	ATF6B
B3GLCT	ATF7IP
B3GNT2	ATF7IP2
B4GALT1	ATG10
B4GALT5	ATG16L1
BAG5	ATG2A
BAG6	ATG2B
BAHD1	ATG4C
BAX	ATG5
BAZ1A	ATL2
BAZ1B	ATL3
BAZ2A	ATM
BAZ2B	ATMIN
BBC3	ATP11A
BBX	ATP11B
BCL10	ATP13A3
BCL11B	ATP1A1
BCL2	ATP2A2
BCL2L11	ATP2A3
BCL6	ATP2B1
BCL9L	ATP2B4
BCLAF1	ATP2C1
BCOR	ATP5F1A
BDP1	ATP5F1B
BET1	ATP5F1E
BFAR	ATP5MC2
BHLHE40	ATP5MC3
BICDL1	ATP5PB
BICRA	ATP6V0D1
BICRAL	ATP6V0E1
BIRC2	ATP6V0E2
BIRC3	ATP6V1A
BIRC5	ATP6V1B2
BIRC6	ATP6V1G1
BLCAP	ATP6V1H
BLM	ATP8A1
BMF	ATP8B2
BMI1	ATRN
BMP2K	ATRX
BMPR1A	ATXN1
BMT2	ATXN2
BNIP2	ATXN2L
BNIP3L	ATXN3
BOD1L1	ATXN7
BORA	ATXN7L3
BPNT1	ATXN7L3B
BPNT2	AUP1
BPTF	AVL9
BRD1	AXIN1
BRD2	AXIN2
BRD4	AZIN1
BRD8	B2M
BRK1	B3GLCT
BRPF1	B3GNT2
BRWD1	B4GALT1
BRWD3	B4GALT3
BTAF1	B4GALT5
BTBD1	BACH1
BTBD11	BACH2
BTBD19	BAG4
BTBD7	BAG6
BTF3	BAHD1
BTF3L4	BAIAP2L2
BTG1	BAP1
BTG2	BARD1
BTN3A1	BAX
BTN3A2	BAZ1A
BUB1	BAZ1B
BUB3	BAZ2A
C11orf58	BAZ2B
C11orf68	BBC3
C12orf29	BBX
C12orf57	BCL10
C14orf28	BCL11B
C16orf72	BCL2
C18orf21	BCL2L11
C18orf25	BCL3
C19orf12	BCL7B
C1D	BCL9L
C1GALT1	BCLAF1
C1QBP	BDP1
C1orf131	BET1
C1orf174	BFAR
C1orf43	BHLHE40
C1orf52	BICDL1
C2CD2L	BICRA
C2CD5	BICRAL
C2orf49	BIRC2
C2orf68	BIRC3
C5orf24	BIRC6
C5orf51	BLCAP
C6orf120	BLM
C6orf62	BLMH
C6orf89	BLOC1S4
C7orf26	BMF
C9orf40	BMI1
CAB39	BMT2
CABLES2	BNIP3
CALM1	BNIP3L
CALM3	BOD1L1
CALR	BPNT1
CAMK2D	BPTF
CAMK4	BRAF
CAMKK2	BRCA1
CAMTA2	BRD1
CAND1	BRD2
CANT1	BRD4
CANX	BRD7
CAP1	BRI3
CAPRIN1	BRIX1
CAPZA1	BRK1
CAPZA2	BRPF3
CAPZB	BRWD1
CARD11	BRWD3
CARD8	BTAF1
CARMIL1	BTBD1
CARMIL2	BTBD11
CARS2	BTBD19
CASC3	BTBD2
CASD1	BTBD7
CASP2	BTBD9
CASP3	BTD
CASP8	BTF3
CAST	BTF3L4
CAT	BTG1
CATSPERB	BTG2
CBFB	BTLA
CBL	BTN3A1
CBLB	BTN3A2
CBLL1	BTN3A3
CBX1	BUB1
CBX3	BUB3
CBX4	BZW1
CBX5	C11orf21
CCDC117	C11orf58
CCDC12	C11orf68
CCDC186	C12orf42
CCDC200	C12orf57
CCDC59	C12orf75
CCDC82	C14orf28
CCDC88A	C16orf72
CCDC88C	C16orf74
CCDC93	C18orf21
CCDC97	C18orf25
CCL4	C19orf12
CCM2	C1D
CCNA2	C1GALT1
CCNB1	C1orf131
CCNC	C1orf174
CCND3	C1orf35
CCNE2	C1orf43
CCNG2	C21orf91
CCNH	C2CD5
CCNI	C2orf49
CCNK	C2orf68
CCNL1	C4orf3
CCNL2	C4orf46
CCNT2	C5orf51
CCR4	C6orf120
CCR7	C6orf62
CCT2	C6orf89
CCT8	C9orf78
CD164	C9orf85
CD2	CA6
CD226	CAAP1
CD247	CAB39
CD28	CALCOCO2
CD2AP	CALHM2
CD37	CALM1
CD3D	CALM3
CD3E	CALR
CD3G	CALU
CD4	CAMK1D
CD40LG	CAMK2D
CD44	CAMK4
CD46	CAMKK2
CD47	CAMTA2
CD48	CAND1
CD5	CANT1
CD52	CANX
CD53	CAP1
CD58	CAPN1
CD6	CAPN15
CD69	CAPRIN1
CD74	CAPZA1
CD81	CAPZA2
CD96	CAPZB
CD99L2	CARD11
CDC14A	CARD8
CDC25B	CARNMT1
CDC27	CARS2
CDC40	CASC3
CDC42EP3	CASD1
CDC42SE1	CASP2
CDC42SE2	CASP7
CDC73	CASP8
CDCA2	CAST
CDCA3	CAT
CDCA7	CATSPERB
CDCA8	CBFB
CDK1	CBL
CDK12	CBLB
CDK13	CBLL1
CDK17	CBR4
CDK2AP2	CBX1
CDK6	CBX3
CDKN1B	CBX4
CDON	CBX5
CDR2	CBX7
CDS2	CCAR2
CDV3	CCDC107
CDYL	CCDC115
CDYL2	CCDC117
CEACAM21	CCDC12
CELF1	CCDC186
CELF2	CCDC200
CEMIP2	CCDC28A
CENPA	CCDC59
CENPB	CCDC6
CENPC	CCDC69
CENPK	CCDC7
CENPM	CCDC71L
CENPO	CCDC82
CENPQ	CCDC88C
CEP128	CCDC9
CEP19	CCDC93
CEP295	CCDC97
CEP350	CCL3
CEP41	CCL4
CEP43	CCL4L2
CEP57	CCL5
CEP70	CCNA2
CEP85L	CCNB2
CEPT1	CCNC
CERS2	CCND3
CFL1	CCNDBP1
CGGBP1	CCNE2
CHAMP1	CCNG1
CHCHD2	CCNG2
CHCHD3	CCNI
CHD1	CCNK
CHD2	CCNL2
CHD3	CCNT1
CHMP5	CCNT2
CHMP7	CCNY
CHST11	CCPG1
CHTOP	CCR2
CIAO1	CCR4
CIAO2B	CCR5
CISH	CCR7
CITED2	CCSER2
CKAP2	CCT2
CKAP2L	CCT4
CKAP5	CCT8
CKS2	CCZ1B
CLASP1	CD164
CLASP2	CD2
CLCN3	CD200
CLDND1	CD226
CLEC2B	CD247
CLEC2D	CD248
CLINT1	CD28
CLK1	CD2AP
CLK2	CD37
CLK4	CD38
CLNS1A	CD3D
CLPTM1L	CD3E
CLPX	CD3G
CLSTN1	CD44
CLSTN3	CD46
CLTA	CD47
CLTC	CD48
CMC1	CD5
CMIP	CD52
CMPK1	CD53
CMTM3	CD55
CMTM6	CD58
CMTM8	CD6
CNBP	CD69
CNEP1R1	CD7
CNIH1	CD70
CNN2	CD74
CNNM3	CD81
CNOT1	CD86
CNOT2	CD8A
CNOT3	CD8B
CNOT6L	CD96
CNOT8	CD99L2
CNOT9	CDC14A
CNST	CDC25B
COG2	CDC27
COIL	CDC40
COMMD10	CDC42EP3
COMMD2	CDC42SE1
COMMD5	CDC42SE2
COP1	CDC73
COPB1	CDCA8
COPB2	CDHR2
COPG1	CDK1
COPG2	CDK12
COPS2	CDK13
COPS8	CDK15
COPZ1	CDK17
CORO1A	CDK2AP2
COTL1	CDK6
COX19	CDKAL1
COX6B1	CDKN1B
COX7A2	CDKN2D
COX7C	CDON
CPD	CDS2
CPEB2	CDV3
CPNE1	CDYL
CPNE3	CDYL2
CPOX	CEACAM21
CPSF3	CEBPB
CPSF6	CEBPZ
CPSF7	CELF1
CRACR2A	CELF2
CREB1	CEMIP2
CREBBP	CENPB
CREBRF	CENPC
CREBZF	CENPF
CRKL	CENPK
CRLF3	CENPM
CROCC	CEP126
CRTAP	CEP192
CRTC2	CEP295
CRTC3	CEP350
CRYBG1	CEP41
CRYZ	CEP57
CSDE1	CEP70
CSGALNACT1	CEP76
CSGALNACT2	CEP85L
CSK	CEP97
CSKMT	CEPT1
CSNK1E	CERS2
CSNK2A1	CERT1
CSNK2A2	CFAP276
CSTB	CFAP44
CSTF1	CFAP97
CSTF2T	CFAP97D2
CSTF3	CFL1
CTBP1	CFLAR
CTC1	CGGBP1
CTDNEP1	CHAMP1
CTDSP1	CHCHD2
CTDSP2	CHCHD3
CTDSPL2	CHD1
CTLA4	CHD2
CTNNB1	CHD3
CTPS1	CHD8
CTR9	CHD9
CTSC	CHMP1A
CTSO	CHMP4B
CUL2	CHMP7
CUL3	CHP1
CUL4A	CHRNE
CUL4B	CHST11
CUL5	CHST12
CUL9	CHTOP
CUTA	CIAO1
CUTC	CIAO2A
CUX1	CIAO2B
CWC15	CIC
CWC25	CIITA
CWF19L1	CIR1
CXCR4	CISH
CXCR5	CKAP2L
CXCR6	CKAP5
CYB5B	CKS2
CYLD	CLASP1
CYP1B1	CLASP2
CYRIB	CLCN3
CYTH1	CLDND1
CYTIP	CLEC16A
DAAM1	CLEC2B
DARS2	CLEC2D
DAZAP1	CLIC1
DAZAP2	CLINT1
DBR1	CLIP1
DBT	CLK1
DCAF12	CLK2
DCAF5	CLK4
DCAF6	CLNS1A
DCAKD	CLPTM1L
DCBLD1	CLPX
DCK	CLSTN1
DCP2	CLSTN3
DCTN3	CLTA
DCTN4	CLTC
DCTN5	CMC1
DCUN1D1	CMIP
DDB1	CMPK1
DDHD1	CMTM3
DDIT4	CMTM6
DDX1	CMTM8
DDX17	CMTR1
DDX18	CNBP
DDX21	CNEP1R1
DDX23	CNIH1
DDX27	CNIH4
DDX3X	CNN2
DDX46	CNNM3
DDX5	CNOT1
DDX6	CNOT2
DEF6	CNOT3
DEGS1	CNOT6L
DEK	CNOT8
DENND1B	CNOT9
DENND4B	CNPPD1
DENND4C	COA1
DENND5A	COG2
DENND6A	COG3
DESI2	COG7
DGCR2	COIL
DGKA	COMMD10
DGKD	COMMD2
DGKE	COMMD5
DHX15	COP1
DHX37	COPA
DHX57	COPB1
DHX8	COPE
DIAPH1	COPG2
DIDO1	COPS2
DIP2B	COPS8
DIPK2A	COPZ1
DIS3	COQ10B
DKC1	CORO1A
DLAT	COTL1
DLD	COX19
DLG1	COX4I1
DLGAP5	COX6B1
DLST	COX7A2L
DMXL1	COX7C
DNAJA1	CPD
DNAJB1	CPEB4
DNAJB11	CPNE1
DNAJB14	CPNE3
DNAJB9	CPQ
DNAJC16	CPSF2
DNAJC3	CPSF3
DNAJC5	CPSF6
DNAJC7	CPSF7
DNAJC8	CPT1A
DNM2	CRACR2A
DNMT1	CREB1
DOCK10	CREB3L2
DOCK11	CREBBP
DOCK2	CREBRF
DOCK8	CREBZF
DOCK9	CRKL
DPP4	CRLF3
DPP8	CRTAP
DPP9	CRTC2
DPY19L1	CRY1
DPY19L4	CRY2
DPYD	CRYBG1
DPYSL2	CRYZ
DR1	CS
DSCC1	CSDE1
DTX3L	CSGALNACT2
DUSP16	CSK
DUSP6	CSNK1A1
DUSP7	CSNK1D
DUT	CSNK1G1
DYM	CSNK2A1
DYNC1H1	CSNK2A2
DYNC1LI2	CSRP1
DYNLL1	CST7
DYNLL2	CSTF1
DYRK1A	CSTF2T
DYRK2	CTBP1
E2F2	CTC1
E2F3	CTCF
E2F4	CTDP1
EAPP	CTDSP1
ECT2	CTDSP2
EDEM1	CTDSPL2
EDEM3	CTLA4
EEA1	CTNNB1
EEF1A1	CTPS1
EEF1B2	CTR9
EEF2	CTSC
EFCAB14	CTSO
EFHD2	CTU1
EFNA3	CUL2
EFR3A	CUL3
EGR1	CUL4A
EHD4	CUL4B
EI24	CUL9
EIF1	CUTA
EIF1AD	CUX1
EIF1AX	CWC15
EIF1B	CWC22
EIF2AK1	CWC25
EIF2AK3	CWF19L1
EIF2S3	CXCR3
EIF3A	CXCR4
EIF3B	CXCR6
EIF3E	CYB5B
EIF3F	CYBA
EIF3G	CYFIP2
EIF3J	CYLD
EIF3L	CYP20A1
EIF3M	CYREN
EIF4A1	CYRIB
EIF4A2	CYTH1
EIF4B	CYTH4
EIF4EBP2	CYTIP
EIF4ENIF1	DAAM1
EIF4G1	DAP3
EIF4G2	DARS2
EIF4G3	DAZAP1
EIF4H	DAZAP2
EIF5	DBI
EIF5A	DCAF12
EIF5B	DCAF4
ELF1	DCAF5
ELF2	DCAF6
ELK1	DCAKD
ELK4	DCK
ELMO1	DCLRE1C
ELOA	DCP2
ELOVL5	DCTN3
EMB	DCTN4
EML4	DCTN5
ENO1	DCUN1D1
ENPP4	DCUN1D4
ENSG00000214265	DCUN1D5
ENSG00000267645	DDB1
ENSG00000271793	DDHD1
ENSG00000272410	DDIT4
ENSG00000273734	DDX1
ENSG00000283782	DDX17
ENSG00000285920	DDX18
EP300	DDX21
EPB41	DDX23
EPC1	DDX27
EPC2	DDX3X
EPHA4	DDX42
ERAP1	DDX5
ERAP2	DDX50
ERC1	DDX6
ERCC1	DEF6
ERCC8	DEGS1
ERG28	DEK
ERGIC1	DENND1B
ERGIC2	DENND1C
ERGIC3	DENND2D
ERH	DENND4B
ERICH1	DENND4C
ERLEC1	DENND5A
ERMP1	DENR
ERN1	DERL1
ERO1A	DESI2
ESCO1	DGCR2
ESYT1	DGCR8
ESYT2	DGKA
ETAA1	DGKD
ETF1	DGKH
ETNK1	DHRS3
ETS1	DHX15
ETS2	DHX36
ETV3	DHX37
ETV6	DHX57
EVA1C	DHX8
EVI2B	DIAPH1
EVL	DICER1
EXD3	DIDO1
EXOC5	DIP2A
EZR	DIP2B
FABP5	DIP2C
FADD	DIPK1A
FAF1	DIPK2A
FAM102A	DISC1
FAM104A	DKC1
FAM107B	DLAT
FAM111A	DLD
FAM117A	DLG1
FAM117B	DLG3
FAM118B	DLG4
FAM120A	DLGAP4
FAM120B	DLGAP5
FAM120C	DLST
FAM126A	DMAP1
FAM126B	DMBX1
FAM169A	DMGDH
FAM172A	DMTN
FAM177A1	DMXL1
FAM193A	DNAAF2
FAM20B	DNAJA2
FAM219A	DNAJB1
FAM43A	DNAJB14
FAM76A	DNAJB6
FAM76B	DNAJB9
FAM78A	DNAJC14
FAM8A1	DNAJC16
FAM91A1	DNAJC3
FAM98B	DNAJC8
FANCI	DNM2
FANCL	DNMT3A
FARSA	DOCK10
FARSB	DOCK11
FASTKD1	DOCK2
FASTKD3	DOCK8
FAU	DOCK9
FBRS	DOP1A
FBXL17	DPEP2
FBXL20	DPP4
FBXL3	DPP8
FBXO11	DPY19L1
FBXO31	DPYD
FBXO33	DPYSL2
FBXO34	DR1
FBXO38	DRAP1
FBXO45	DSCC1
FBXO5	DSTN
FBXO7	DTNB
FBXW11	DTWD2
FBXW2	DTX3L
FBXW7	DUSP16
FCF1	DUSP22
FCHSD2	DUSP5
FCMR	DUSP6
FDFT1	DUSP7
FDXR	DYM
FECH	DYNC1H1
FEM1C	DYNC1LI2
FEZ2	DYNC2I1
FGD3	DYNLL1
FGFR1OP2	DYNLL2
FHIP2A	DYRK1A
FHIT	DYRK2
FKBP5	E2F3
FLI1	EAF1
FLNA	ECHDC1
FLOT2	ECT2
FMNL1	EDEM1
FMR1	EDEM3
FNBP1	EEA1
FNBP4	EEF1A1
FNIP2	EEF1B2
FOSL2	EEF2
FOXJ3	EFCAB14
FOXN2	EFHD2
FOXN3	EFNA3
FOXO1	EFR3A
FOXO3	EGLN3
FOXP1	EGR1
FRAT2	EGR3
FRMD6	EHD1
FRMD8	EHD4
FRYL	EI24
FTH1	EID1
FTL	EIF1
FUBP1	EIF1AD
FURIN	EIF1AX
FUS	EIF2A
FUT10	EIF2AK1
FUT11	EIF2S1
FUT8	EIF2S3
FYB1	EIF3A
FYN	EIF3B
G3BP1	EIF3E
G3BP2	EIF3F
GABARAPL2	EIF3G
GABPA	EIF3H
GABPB1	EIF3J
GALNT3	EIF3L
GALNT7	EIF3M
GAN	EIF4A1
GANAB	EIF4A2
GAPDH	EIF4A3
GAR1	EIF4B
GART	EIF4E
GATA3	EIF4EBP2
GATAD2B	EIF4ENIF1
GATC	EIF4G1
GBP2	EIF4G2
GBP4	EIF4H
GBP5	EIF5
GCC2	EIF5A
GCH1	EIF5AL1
GCLC	EIF5B
GCN1	EIF6
GDI2	EIPR1
GFM1	ELF1
GFM2	ELF2
GGA2	ELF4
GGA3	ELK1
GID4	ELK4
GIGYF2	ELMO1
GIMAP2	ELMO2
GIMAP4	ELOA
GIMAP6	ELOC
GIMAP7	ELOF1
GIT2	ELOVL5
GLB1	ELP1
GLCCI1	ELP2
GLG1	EMB
GLIPR1	EMC10
GLOD4	EML4
GLRX3	EMSY
GLS	ENO1
GLUD1	ENOSF1
GMEB2	ENSA
GMFB	ENSG00000214265
GMFG	ENSG00000255292
GMNN	ENSG00000267645
GNA12	ENSG00000268797
GNA13	ENSG00000269242
GNAQ	ENSG00000271793
GNAS	ENSG00000272410
GNB1	ENSG00000273734
GNG2	ENSG00000281039
GNG5	ENSG00000283782
GNPTAB	ENSG00000283977
GOLGA4	ENSG00000285283
GOLM2	ENSG00000285920
GOLPH3	ENSG00000286098
GOLPH3L	ENTPD1
GOLT1B	ENTPD6
GON4L	EOMES
GOSR1	EP300
GPATCH11	EPB41
GPBP1L1	EPC1
GPCPD1	EPC2
GPR15	EPHA1
GPR171	EPHX2
GPR174	EPS15
GPR183	ERAP1
GPR65	ERAP2
GPRIN3	ERBIN
GPSM3	ERC1
GRAMD1B	ERCC1
GRAMD2B	ERCC3
GRB2	ERCC6L2
GRIPAP1	ERCC8
GRK2	ERG28
GRK3	ERGIC1
GRK5	ERGIC2
GRK6	ERGIC3
GRM5	ERH
GRPEL2	ERICH1
GRSF1	ERLEC1
GSK3B	ERMP1
GSKIP	ERN1
GSPT1	ERO1A
GSPT2	ESCO1
GTF2A1	ESRRA
GTF2A2	ESYT1
GTF3C2	ESYT2
GTPBP4	ETAA1
GTPBP8	ETF1
H1-10	ETNK1
H1-2	ETS1
H1-3	ETS2
H1-4	ETV3
H1-5	ETV6
H2AC11	EVA1C
H2AC12	EVL
H2AC13	EXD3
H2AC14	EXOC6B
H2AC15	EXOC8
H2AC16	EXT1
H2AC17	EZR
H2AC20	F2R
H2AC21	FABP5
H2AC4	FADD
H2AC6	FADS2
H2AC8	FAF2
H2AZ1	FAM102A
H2AZ2	FAM102B
H2BC11	FAM104A
H2BC12	FAM107B
H2BC13	FAM117A
H2BC14	FAM117B
H2BC15	FAM120A
H2BC17	FAM120AOS
H2BC18	FAM120B
H2BC21	FAM120C
H2BC3	FAM126A
H2BC4	FAM126B
H2BC5	FAM133B
H2BC6	FAM135A
H2BC7	FAM169A
H2BC8	FAM171A1
H2BC9	FAM172A
H3-3B	FAM174A
H3C10	FAM199X
H3C11	FAM20B
H3C12	FAM219A
H3C13	FAM76A
H3C2	FAM78A
H3C3	FAM91A1
H3C7	FAM98B
H3C8	FANCF
H4C11	FANCL
H4C12	FANCM
H4C13	FAR1
H4C2	FARSA
H4C3	FAS
H4C4	FASTKD1
H4C5	FASTKD3
H4C6	FAU
H4C8	FBLN5
H4C9	FBRS
HADHB	FBXL14
HAT1	FBXL16
HBS1L	FBXL17
HCFC1	FBXL20
HCLS1	FBXL3
HDAC1	FBXO11
HDAC2	FBXO21
HDAC4	FBXO3
HDAC7	FBXO31
HDLBP	FBXO32
HEATR1	FBXO33
HECA	FBXO34
HECTD1	FBXO38
HECTD4	FBXO42
HEG1	FBXO5
HELB	FBXO7
HELLS	FBXO9
HELZ	FBXW11
HERC1	FBXW2
HERC3	FBXW7
HERPUD1	FCHSD2
HES1	FCMR
HEXIM1	FDFT1
HIBADH	FDXR
HIBCH	FECH
HIF1A	FEM1B
HILPDA	FEM1C
HINT1	FEZ2
HIPK1	FGD3
HIPK2	FGFR1OP2
HIVEP2	FHIP2A
HLA-A	FIS1
HLA-B	FLI1
HLA-C	FLNA
HLA-DRA	FLOT2
HLA-E	FMNL1
HMBOX1	FNBP1
HMG20A	FNBP4
HMGA1	FNIP2
HMGB1	FOCAD
HMGB2	FOSL2
HMGCR	FOXJ2
HMGN1	FOXJ3
HMGN2	FOXK1
HMGXB3	FOXN2
HMGXB4	FOXN3
HMMR	FOXO1
HNRNPA0	FOXP1
HNRNPA1	FRAT1
HNRNPA2B1	FRMD8
HNRNPA3	FRYL
HNRNPAB	FTH1
HNRNPC	FTL
HNRNPD	FUBP1
HNRNPDL	FUBP3
HNRNPF	FURIN
HNRNPH1	FUS
HNRNPK	FUT10
HNRNPR	FUT11
HNRNPU	FUT8
HNRNPUL1	FXYD5
HNRNPUL2	FYB1
HOMEZ	FYN
HP1BP3	FYTTD1
HPS3	G3BP1
HS3ST3B1	G3BP2
HSD17B4	GAB2
HSP90AA1	GAB3
HSP90AB1	GABARAPL2
HSP90B1	GABBR1
HSPA13	GABPA
HSPA1A	GABPB1
HSPA5	GALNT1
HSPA8	GALNT11
HSPA9	GALNT3
HSPH1	GALNT7
HUWE1	GAN
HYOU1	GANAB
IBTK	GAPDH
ICAM2	GAPVD1
ICE1	GAR1
ICOS	GAREM1
ID2	GART
ID3	GATA3
IDI1	GATAD2B
IER2	GBP2
IER3	GBP3
IER5	GBP4
IFFO1	GBP5
IFFO2	GCC1
IFI16	GCC2
IFNGR1	GCH1
IFT46	GCLC
IGF1R	GCN1
IGF2R	GCNT1
IGIP	GDAP1
IGSF9B	GDI2
IKBKB	GEMIN5
IKZF1	GFM1
IKZF3	GFM2
IL10	GGA2
IL16	GGA3
IL2	GID4
IL2RB	GID8
IL32	GIGYF2
IL6ST	GIMAP2
IL7R	GIMAP4
ILF2	GIMAP6
ILF3	GIMAP7
IMMP2L	GIT1
IMMT	GLB1
INCENP	GLCCI1
ING1	GLE1
ING4	GLG1
INPP1	GLIPR1
INPP4A	GLIPR2
INPP4B	GLMN
INSIG1	GLOD4
INSIG2	GLRX3
INTS3	GLS
INTS6	GLT8D1
IPO5	GLUD1
IPO7	GLUL
IQGAP1	GLYR1
IQGAP2	GMCL1
IRAG2	GMDS
IREB2	GMFB
IRF1	GNA13
IRF2	GNAI2
IRF2BP2	GNAI3
IRF2BPL	GNAQ
IRF4	GNAS
ISCA1	GNB1
ISCA2	GNB5
ISCU	GNE
IST1	GNG2
ITCH	GNG5
ITFG1	GNGT2
ITGA4	GNL3L
ITGAL	GNLY
ITGAV	GNPTAB
ITGB1	GNS
ITGB1BP1	GOLGA1
ITGB2	GOLGA2
ITK	GOLGA4
ITM2A	GOLGA7
ITM2B	GOLGA7B
ITPA	GOLGB1
ITPKB	GOLM2
ITPR1	GOLPH3
ITPR2	GORASP2
ITPRID2	GOSR1
IVNS1ABP	GPATCH2
JADE1	GPATCH8
JADE2	GPBP1
JAK1	GPBP1L1
JAML	GPCPD1
JARID2	GPD1L
JKAMP	GPR107
JMJD1C	GPR132
JMY	GPR15
JUNB	GPR155
JUND	GPR171
KANSL1	GPR174
KAT2B	GPR183
KAT6A	GPR65
KAT6B	GPRIN3
KATNBL1	GPSM3
KBTBD2	GRAMD1B
KBTBD6	GRAP2
KCNA3	GRB2
KCNAB2	GRIPAP1
KCNK4	GRK2
KCTD10	GRK3
KCTD2	GRK5
KCTD20	GRK6
KCTD21	GRM5
KCTD6	GRSF1
KDELR1	GRWD1
KDM4C	GSE1
KDM5A	GSK3B
KDM5B	GSKIP
KDM5C	GSPT1
KDM6A	GSTK1
KDM7A	GSTO1
KDSR	GTDC1
KEAP1	GTF2A1
KHDRBS1	GTF2A2
KHSRP	GTF2B
KIAA0232	GTF3C2
KIAA1109	GTF3C4
KIAA1143	GTPBP10
KIAA1586	GTPBP2
KIAA2026	GTPBP4
KICS2	GTPBP8
KIF11	GUCD1
KIF21A	GYG1
KIF21B	GZMA
KIF5B	GZMB
KIFAP3	GZMK
KIN	H1-2
KLF12	H1-3
KLF13	H1-4
KLF2	H1-5
KLF3	H2AC11
KLF6	H2AC12
KLF7	H2AC13
KLF9	H2AC17
KLHDC2	H2AC20
KLHDC4	H2AC6
KLHL13	H2AC8
KLHL20	H2AX
KLHL21	H2AZ1
KLHL24	H2BC11
KLHL5	H2BC12
KLHL6	H2BC14
KMT2A	H2BC17
KMT2C	H2BC3
KMT2D	H2BC4
KMT2E	H2BC5
KMT5B	H2BC8
KPNA1	H2BC9
KPNA2	H3-3B
KPNA3	H3C10
KPNA4	H3C11
KPNA6	H3C12
KPNB1	H3C2
KRAS	H3C3
KRR1	H3C7
KTN1	H3C8
KXD1	H4C2
L3MBTL3	H4C3
LACTB2	H4C4
LAMTOR1	H4C5
LAMTOR3	H4C6
LAMTOR5	H4C8
LAPTM5	H6PD
LARP1	HABP4
LARP4B	HADHB
LARP7	HAPLN3
LASP1	HAT1
LAT	HAVCR1
LBH	HBP1
LBR	HBS1L
LCK	HCCS
LCLAT1	HCFC1
LCOR	HCLS1
LCP1	HDAC1
LCP2	HDAC2
LDHA	HDAC4
LDHB	HDAC7
LDLR	HECA
LDLRAD4	HECTD1
LDLRAP1	HECTD4
LEAP2	HECW1
LEF1	HELB
LEMD3	HELLS
LENG8	HELZ
LEPROTL1	HENMT1
LFNG	HERC1
LHFPL3	HERC4
LIMS1	HERPUD1
LIN54	HERPUD2
LIN7C	HES5
LINC02210-CRHR1	HEXIM1
LITAF	HGSNAT
LIX1L	HIBADH
LMBR1	HIBCH
LMBRD1	HIC1
LMNB1	HINT1
LMO7	HIPK1
LNPEP	HIPK2
LPAR5	HIPK3
LPAR6	HIVEP2
LPCAT3	HIVEP3
LPIN1	HK2
LPIN2	HLA-A
LPP	HLA-B
LPXN	HLA-C
LRATD2	HLA-DMB
LRBA	HLA-DQA1
LRCH1	HLA-DQB1
LRCH3	HLA-DRB1
LRIG1	HLA-E
LRIG2	HLA-F
LRP10	HLCS
LRR1	HMBOX1
LRRC41	HMGA1
LRRC42	HMGB1
LRRC58	HMGB2
LRRC59	HMGB3
LRRC61	HMGCR
LRRC8A	HMGCS1
LRRN3	HMGN2
LSM14A	HMGXB3
LSM2	HMGXB4
LSM5	HMMR
LSM6	HNRNPA0
LSM8	HNRNPA1
LSP1	HNRNPA2B1
LTB	HNRNPA3
LTN1	HNRNPC
LUC7L2	HNRNPD
LUC7L3	HNRNPF
LUZP1	HNRNPH1
LYAR	HNRNPH2
LYPLA1	HNRNPH3
LYRM7	HNRNPK
LYSMD3	HNRNPL
LYST	HNRNPM
M6PR	HNRNPR
MACF1	HNRNPU
MACIR	HNRNPUL1
MACROH2A1	HNRNPUL2
MAD2L1	HOMEZ
MAD2L1BP	HOPX
MAF	HP1BP3
MAF1	HPCAL1
MAFK	HPS5
MAIP1	HPS6
MAK16	HS3ST3B1
MALSU1	HSBP1
MALT1	HSD17B11
MAML2	HSD17B4
MAN1A1	HSP90AA1
MAN1C1	HSP90B1
MAN2A1	HSPA5
MANBA	HSPA8
MANEA	HSPD1
MAP2K1	HSPH1
MAP3K1	HTT
MAP3K4	HUWE1
MAP3K5	HVCN1
MAP3K8	HYOU1
MAP4K1	IAH1
MAP4K4	IARS1
MAP4K5	IBTK
MAP7D1	ICAM2
MAPK1	ICE1
MAPK14	ICOS
MAPK8	ID1
MAPRE2	ID2
MARCHF6	ID3
MARF1	IDE
MARK2	IDH2
MAST4	IDI1
MASTL	IER2
MAT2A	IER3
MAT2B	IER5
MATR3	IER5L
MAX	IFFO1
MAZ	IFFO2
MB21D2	IFI16
MBD1	IFIT5
MBIP	IFITM2
MBNL1	IFNGR1
MBP	IFT46
MCCC2	IGF2R
MCL1	IGSF9B
MCM3	IK
MCM7	IKBKE
MCM9	IKZF1
MCMBP	IKZF2
MCUB	IKZF3
MDFIC	IL10RA
MDH2	IL16
MDM2	IL17RA
MEAF6	IL18RAP
MECP2	IL2RB
MED1	IL32
MED13	IL6ST
MED13L	IL7R
MED21	ILF2
MED23	ILF3
MED28	ILRUN
MED29	IMMP2L
MED4	IMMT
MED9	IMP3
MEGF9	INCENP
METAP1	ING1
METTL13	ING3
METTL14	INO80D
METTL16	INPP1
METTL17	INPP4A
METTL2B	INPP4B
METTL8	INPP5B
METTL9	INPP5D
MEX3B	INPP5K
MFAP1	INPPL1
MFHAS1	INSIG1
MFN1	INSIG2
MFSD1	INTS11
MFSD14B	INTS12
MFSD6	INTS2
MGA	INTS3
MGAT1	IP6K2
MGAT3	IPCEF1
MGAT4A	IPO11
MGAT5	IPO5
MIA2	IPO7
MIA3	IQGAP1
MIB1	IQGAP2
MICB	IQSEC1
MIDEAS	IRAG2
MIDN	IRF1
MIEF1	IRF2
MIER1	IRF2BP2
MIER3	IRF2BPL
MIGA2	IRF4
MINDY2	IRS2
MIOS	ISCA1
MIS12	ISCU
MITD1	ISG20
MKLN1	IST1
MKNK1	ITCH
MKNK2	ITFG1
MKRN2	ITGA1
MLEC	ITGA4
MLLT10	ITGA9
MLLT3	ITGAE
MLLT6	ITGAL
MMADHC	ITGAM
MMD	ITGAV
MMS22L	ITGAX
MMUT	ITGB1
MOB1A	ITGB1BP2
MOB3A	ITGB2
MON1B	ITK
MORC3	ITM2A
MORF4L1	ITM2B
MORF4L2	ITM2C
MPHOSPH10	ITPA
MPHOSPH6	ITPKB
MPHOSPH8	ITPR1
MPHOSPH9	ITPR2
MPRIP	ITPRID2
MPZL3	ITSN2
MRI1	IVNS1ABP
MRPL10	JADE2
MRPL13	JAGN1
MRPL3	JAK1
MRPL33	JAK2
MRPL34	JAK3
MRPL36	JAKMIP2
MRPL39	JAML
MRPL50	JARID2
MRPS14	JKAMP
MRPS27	JMJD1C
MRPS33	JMY
MRTFA	JPT2
MSI2	JUN
MSL2	JUNB
MSL3	KANSL1
MSN	KAT2B
MT-ND6	KAT6A
MT1X	KAT6B
MT2A	KAT7
MTA2	KATNBL1
MTDH	KBTBD2
MTERF1	KBTBD6
MTHFD2	KCMF1
MTM1	KCNA3
MTMR14	KCNH8
MTMR3	KCNIP4
MTMR6	KCNK4
MTO1	KCNMA1
MTPN	KCTD10
MTR	KCTD2
MTRR	KCTD20
MXI1	KCTD21
MYADM	KCTD6
MYB	KDELR1
MYC	KDM2A
MYCBP2	KDM2B
MYH9	KDM3A
MYL12A	KDM4B
MYL12B	KDM4C
MYL6	KDM5A
MYO18A	KDM5B
MYO1G	KDM6A
MYSM1	KDM6B
MZT1	KDM7A
N4BP1	KDSR
N4BP2L1	KEAP1
N4BP2L2	KHDC4
NAA16	KHDRBS1
NAA35	KHSRP
NAA38	KIAA0232
NAA50	KIAA0319L
NAB1	KIAA0753
NABP1	KIAA1109
NACA	KIAA1143
NAP1L1	KIAA1191
NAP1L4	KIAA1671
NAPA	KIAA2026
NARS1	KIF11
NASP	KIF14
NBAS	KIF18B
NBDY	KIF20B
NBEAL1	KIF21A
NBPF15	KIF21B
NCAPD2	KIF3A
NCAPG	KIF5B
NCAPG2	KIFAP3
NCBP1	KLF10
NCK2	KLF12
NCKAP1L	KLF13
NCL	KLF2
NCOA1	KLF3
NCOA2	KLF6
NCOA3	KLF7
NCOA4	KLF9
NCOA7	KLHDC2
NCOR1	KLHDC4
NCOR2	KLHL13
NCSTN	KLHL2
NDFIP1	KLHL21
NDRG1	KLHL24
NDUFA10	KLHL28
NDUFA4	KLHL6
NDUFA5	KLRC4-KLRK1
NDUFAF5	KLRD1
NDUFB1	KMT2A
NDUFB6	KMT2B
NDUFB9	KMT2C
NDUFS2	KMT2D
NDUFS4	KMT2E
NDUFS7	KMT5B
NDUFV2	KNL1
NECAP2	KPNA1
NEDD1	KPNA2
NEIL3	KPNA3
NEK1	KPNA4
NEK7	KPNA6
NELFA	KPNB1
NELL2	KRAS
NEMF	KRBOX5
NEMP1	KSR1
NEMP2	KTN1
NET1	KXD1
NF1	LACTB2
NF2	LAIR1
NFAT5	LAMP2
NFATC2	LAMTOR1
NFATC3	LAMTOR3
NFE2L1	LAP3
NFE2L2	LAPTM5
NFKB1	LARP1
NFKBIA	LARP1B
NFKBID	LARP4
NFKBIZ	LARP4B
NFYA	LARP7
NFYB	LARS1
NFYC	LASP1
NHLRC2	LAT
NIN	LBH
NIP7	LBR
NIPA1	LCLAT1
NIPBL	LCOR
NKTR	LCP1
NLK	LCP2
NLRC3	LDHA
NLRC5	LDHB
NLRP1	LDLR
NMRK1	LDLRAD4
NMT2	LDLRAP1
NNT	LDOC1
NOA1	LEF1
NOG	LEMD3
NOL11	LENG8
NOL8	LEPR
NOLC1	LEPROTL1
NONO	LFNG
NOP10	LHFPL3
NOP58	LIG3
NOTCH1	LIMD1
NPAT	LIMS1
NPEPPS	LIN54
NPM1	LIN7C
NPTN	LINGO1
NR1D2	LINS1
NR2C2	LITAF
NR3C1	LIX1L
NRAS	LMAN1
NRDE2	LMAN2
NRF1	LMBR1
NSD2	LMBRD1
NSD3	LMNB1
NSF	LMO7
NSMAF	LMTK2
NSMCE2	LNPEP
NT5C3A	LNPK
NUBP2	LONP2
NUCKS1	LPAR5
NUDT21	LPCAT3
NUDT4	LPGAT1
NUFIP1	LPIN1
NUFIP2	LPIN2
NUMA1	LPP
NUP133	LPXN
NUP153	LRBA
NUP160	LRCH1
NUP205	LRCH3
NUP210	LRIG1
NUP214	LRIG2
NUP35	LRP2
NUP50	LRR1
NUP54	LRRC42
NUP85	LRRC58
NUP88	LRRC59
NXF1	LRRC61
OARD1	LRRC8A
OAS2	LRRC8B
OAT	LRRFIP1
OBI1	LRRN3
OCIAD1	LSM1
ODF2	LSM12
ODF2L	LSM14A
ODR4	LSM14B
OGA	LSM2
OGFOD1	LSM4
OGFR	LSM5
OGFRL1	LSM6
OGT	LSM8
OLA1	LSP1
OPTN	LTB
ORC2	LUC7L2
ORC4	LUC7L3
ORMDL1	LUZP1
ORMDL2	LY6E
ORMDL3	LYAR
OSBP	LYPLA1
OSBPL3	LYRM7
OSBPL8	LYST
OSGIN2	M6PR
OST4	MACF1
OSTC	MACIR
OSTF1	MACROH2A1
OTUD1	MADD
OTULIN	MAEA
OTULINL	MAF
P2RY10	MAF1
PA2G4	MAFK
PABIR2	MAGED1
PABPC1	MAGT1
PABPC4	MAIP1
PACS1	MAK16
PAFAH1B1	MAL
PAFAH1B2	MALT1
PAG1	MAML1
PAIP2	MAML2
PAK1IP1	MAMLD1
PAK2	MAN1C1
PALM2AKAP2	MAN2A1
PALS1	MANBA
PALS2	MANEA
PAN3	MANF
PANK3	MAP2K1
PAPOLA	MAP3K1
PAPOLG	MAP3K2
PARK7	MAP3K3
PARP1	MAP3K4
PARP11	MAP3K5
PARP12	MAP3K7CL
PARP15	MAP3K8
PARP4	MAP4
PARP8	MAP4K1
PASK	MAP4K4
PAXBP1	MAP4K5
PAXIP1	MAP7D1
PBX2	MAPK1
PCBP1	MAPK1IP1L
PCBP2	MAPK8
PCCA	MAPK8IP3
PCF11	MAPKAPK2
PCGF3	MAPRE1
PCIF1	MAPRE2
PCMT1	MARCHF6
PCMTD1	MARCKSL1
PCMTD2	MARF1
PCNA	MARK2
PCNX1	MARK3
PCNX4	MAST3
PCSK7	MAST4
PDCD10	MAT2A
PDCD11	MAT2B
PDCD4	MATR3
PDCD6IP	MAVS
PDCD7	MAX
PDCL	MAZ
PDE3B	MB21D2
PDE4B	MBD5
PDE4D	MBD6
PDE7A	MBNL1
PDE8A	MBP
PDIA4	MBTD1
PDIA6	MCCC2
PDK1	MCL1
PDS5A	MCM3
PDS5B	MCM3AP
PDXK	MCM7
PEX11B	MCM9
PEX12	MCMBP
PEX14	MCTP2
PEX2	MCUB
PEX6	MDFIC
PFAS	MDH1
PFDN5	MDH2
PFKFB3	MDM1
PFN1	MDM2
PGAM1	MDN1
PGK1	ME2
PGPEP1	MECP2
PGRMC2	MED1
PHACTR4	MED12
PHAF1	MED12L
PHB2	MED13
PHC3	MED13L
PHF10	MED21
PHF12	MED23
PHF13	MED24
PHF14	MED28
PHF19	MED29
PHF2	MED31
PHF20	MED4
PHF20L1	MED6
PHF5A	MED8
PHF8	MED9
PHLPP1	MEF2D
PI4K2A	MEGF8
PIAS1	METAP1
PIAS3	METTL14
PICALM	METTL15
PIEZO1	METTL17
PIK3C2B	METTL2B
PIK3CA	METTL8
PIK3CB	MFAP1
PIK3IP1	MFF
PIK3R1	MFN1
PIK3R5	MFSD1
PIKFYVE	MFSD14B
PIM1	MFSD6
PIM2	MGA
PIP4K2A	MGAT1
PIP4K2B	MGAT3
PIP5K1A	MGAT4A
PISD	MGAT5
PITPNB	MGMT
PITPNC1	MIA2
PJA2	MIA3
PKD2	MIB1
PKN1	MICA
PKN2	MIDEAS
PKNOX1	MIDN
PLAC8	MIER1
PLAGL2	MIER3
PLCL1	MIGA2
PLCL2	MINDY2
PLEC	MINK1
PLIN2	MIOS
PLK4	MIS12
PLRG1	MIS18BP1
PNISR	MITD1
PNN	MKLN1
PNRC1	MKNK1
PNRC2	MKNK2
POGK	MKRN1
POLA1	MKRN2
POLB	MLEC
POLD3	MLF2
POLE2	MLLT10
POLE3	MLLT3
POLG	MLLT6
POLR1C	MLX
POLR1F	MLYCD
POLR2A	MMADHC
POLR2B	MMUT
POLR3E	MNAT1
POLR3GL	MNT
POM121	MOAP1
POM121C	MOB1A
POMGNT1	MOB3A
POMGNT2	MORC3
POMK	MORF4L1
POU2AF1	MORF4L2
POU2F1	MOSMO
POU2F2	MPHOSPH6
PPA1	MPHOSPH8
PPARD	MPHOSPH9
PPFIA1	MPRIP
PPIA	MRE11
PPID	MRFAP1
PPIG	MRFAP1L1
PPIH	MRPL10
PPIL4	MRPL11
PPIP5K2	MRPL13
PPM1K	MRPL16
PPP1CA	MRPL3
PPP1CC	MRPL34
PPP1R10	MRPL35
PPP1R12A	MRPL36
PPP1R15B	MRPL39
PPP1R16B	MRPL44
PPP1R18	MRPL50
PPP1R21	MRPL57
PPP1R3E	MRPS14
PPP1R8	MRPS18B
PPP1R9B	MRPS21
PPP2R1A	MRPS23
PPP2R2A	MRPS33
PPP2R5C	MRPS6
PPP2R5E	MRTFA
PPP3CB	MRTFB
PPP3CC	MSH2
PPP4R2	MSI2
PPP4R3A	MSL1
PPP4R3B	MSL2
PPP6C	MSL3
PPP6R3	MSN
PPTC7	MT-ATP8
PRAG1	MT-CO1
PRDM1	MT-CO2
PRDM10	MT-CO3
PRDM2	MT-CYB
PRDM8	MT-ND1
PRDX1	MT-ND2
PRDX3	MT-ND3
PRELID3B	MT-ND4
PREP	MT-ND4L
PREPL	MT-ND5
PREX1	MT-ND6
PRKAA1	MT2A
PRKACA	MTA2
PRKACB	MTDH
PRKAR1A	MTERF1
PRKCA	MTERF4
PRKCB	MTF1
PRKCH	MTF2
PRKCI	MTM1
PRKCQ	MTMR12
PRKD2	MTMR14
PRKDC	MTMR3
PRKRA	MTMR6
PRKX	MTO1
PRMT3	MTPN
PRNP	MTR
PROK2	MTSS2
PROSER1	MXD1
PRPF38B	MXD4
PRPF40A	MXI1
PRPF4B	MYADM
PRPF8	MYB
PRPS1	MYCBP
PRPS2	MYCBP2
PRPSAP1	MYD88
PRR12	MYH9
PRR3	MYL12A
PRRC1	MYL12B
PRRC2B	MYL6
PRRC2C	MYO1G
PSAT1	MYO9A
PSD4	MYSM1
PSIP1	N4BP1
PSMA3	N4BP2L1
PSMA4	N4BP2L2
PSMA7	NAA30
PSMB2	NAA35
PSMB4	NAA38
PSMB5	NAA50
PSMB8	NAB1
PSMB9	NABP1
PSMC2	NACC1
PSMC6	NADK
PSMD11	NAP1L1
PSMD12	NAP1L4
PSMD2	NAPA
PSME3	NARS1
PSME3IP1	NARS2
PSME4	NASP
PSMF1	NATD1
PSMG2	NAXE
PSMG4	NBAS
PTAR1	NBDY
PTBP1	NBEAL1
PTBP2	NBPF1
PTBP3	NBPF3
PTCH2	NBR1
PTDSS1	NCALD
PTEN	NCAPD2
PTGER2	NCK1
PTGER4	NCK2
PTGES3	NCKAP1L
PTK2B	NCL
PTMA	NCOA2
PTP4A2	NCOA3
PTP4A3	NCOA4
PTPN1	NCOA7
PTPN11	NCOR1
PTPN23	NCOR2
PTPN4	NCSTN
PTPN6	NDEL1
PTPRA	NDFIP1
PTPRC	NDRG1
PTPRE	NDRG3
PTPRJ	NDUFA10
PUM1	NDUFA5
PUM2	NDUFAF5
PURA	NDUFB1
PURB	NDUFB6
PUS10	NDUFS1
PUS7	NDUFS2
PWWP2A	NDUFS4
PYGO2	NDUFV2
QKI	NDUFV3
QSOX1	NECAP2
R3HDM2	NEDD1
R3HDM4	NEDD9
RAB10	NEIL3
RAB11A	NEK1
RAB11B	NEK11
RAB14	NEK7
RAB18	NEK9
RAB1A	NELFCD
RAB21	NELL2
RAB27A	NEMF
RAB28	NEMP1
RAB2A	NET1
RAB2B	NF1
RAB3GAP2	NF2
RAB5B	NFAT5
RAB6A	NFATC1
RAB7A	NFATC2
RAB8A	NFATC2IP
RAB8B	NFATC3
RABEP1	NFE2L1
RABGAP1L	NFE2L2
RABGGTB	NFIC
RAC2	NFKB1
RACGAP1	NFKBIA
RACK1	NFKBID
RAD1	NFKBIE
RAD18	NFKBIZ
RAD21	NFRKB
RAD23B	NFU1
RAD54L2	NFYA
RALGDS	NFYB
RAN	NGDN
RANBP1	NGLY1
RANBP2	NHSL2
RANBP3	NIBAN1
RANBP9	NIM1K
RAP1A	NIN
RAP1B	NINJ1
RAP2B	NIP7
RAP2C	NIPA1
RAPGEF1	NIPA2
RAPGEF2	NIPBL
RAPGEF6	NKG7
RARA	NKTR
RARS1	NLRC5
RARS2	NLRP1
RASA2	NLRP2
RASGRP1	NMT2
RASGRP2	NOA1
RASSF3	NOB1
RASSF5	NOL10
RB1	NOL11
RBBP4	NOL4L
RBBP5	NOL8
RBBP6	NONO
RBBP7	NOP10
RBBP8	NOP58
RBFOX2	NOTCH1
[truncated: 1,690 more rows]

## Sheet: Human 3UTR
CD4+	CD8
AAK1	AAK1
AASDHPPT	AAMP
ABCB10	AASDHPPT
ABCC5	ABCC5
ABCD3	ABCD3
ABCE1	ABCE1
ABHD17B	ABCF1
ABHD3	ABHD13
ABHD6	ABHD17B
ABI1	ABHD2
ABL2	ABHD4
ABLIM1	ABHD8
ABRACL	ABI1
ACAA2	ABL1
ACAP2	ABL2
ACIN1	ABLIM1
ACLY	ABRACL
ACOX1	ACAA2
ACP1	ACAD8
ACSS1	ACAP2
ACTB	ACIN1
ACTG1	ACLY
ACTN4	ACOX1
ACTR10	ACP1
ACTR2	ACSL4
ACTR3	ACTB
ACTR5	ACTG1
ADA2	ACTL6A
ADAM10	ACTN1
ADAM17	ACTN4
ADAM19	ACTR10
ADAR	ACTR1A
ADARB1	ACTR1B
ADAT2	ACTR2
ADCY7	ACTR3
ADD1	ACTR5
ADD3	ACVR1B
ADNP	ADA2
ADO	ADAM10
ADSS2	ADAM17
AEBP2	ADAM8
AFDN	ADAMTS1
AFF1	ADAR
AFF4	ADARB1
AGAP2	ADD1
AGFG1	ADD3
AGO2	ADGRE5
AGPAT5	ADIPOR2
AGPS	ADNP
AHCTF1	ADRB2
AHCYL1	ADSS2
AHNAK	AEBP2
AIDA	AFAP1L2
AK2	AFF1
AK6	AFF4
AKAP10	AFTPH
AKAP11	AGAP2
AKAP13	AGAP3
AKIRIN1	AGFG1
AKNA	AGO2
AKR1B1	AGPAT1
AKR1C1	AGPAT5
ALG13	AHCTF1
ALG6	AHCY
ALKBH1	AHDC1
ALKBH5	AHNAK
ALYREF	AK2
AMD1	AK3
AMFR	AK6
AMPD3	AKAP1
ANAPC16	AKAP10
ANAPC5	AKAP11
ANGEL2	AKAP13
ANKDD1A	AKAP8
ANKH	AKIRIN1
ANKRD10	AKNA
ANKRD11	AKR1B1
ANKRD12	AKT2
ANKRD13A	AKTIP
ANKRD37	ALG10
ANKRD40	ALG10B
ANKRD44	ALG5
ANP32A	ALG6
ANP32B	ALYREF
ANP32E	AMD1
ANXA1	AMFR
ANXA2R	AMPD3
ANXA5	ANAPC16
ANXA7	ANAPC5
AP1G1	ANGEL2
AP1M1	ANKDD1A
AP1S2	ANKH
AP2B1	ANKRD10
AP3M1	ANKRD11
AP3M2	ANKRD12
AP5M1	ANKRD13A
APAF1	ANKRD40
APBB1IP	ANKRD44
APH1A	ANP32A
API5	ANP32B
APLP2	ANP32E
APOL6	ANXA1
APP	ANXA11
APPBP2	AP1G1
APPL1	AP1M1
AQP3	AP1S1
AQR	AP1S2
ARCN1	AP2B1
ARF1	AP3M1
ARF6	AP3M2
ARFGAP3	APAF1
ARFGEF1	APEX1
ARFGEF2	APH1A
ARGLU1	APH1B
ARHGAP25	APOL6
ARHGAP30	APOOL
ARHGAP35	APPBP2
ARHGAP45	AQP3
ARHGAP5	ARAP2
ARHGAP9	ARCN1
ARHGDIB	AREL1
ARHGEF6	ARF1
ARHGEF7	ARF6
ARID1A	ARFGAP3
ARID2	ARFGEF1
ARID3A	ARFGEF2
ARID4A	ARFIP1
ARID4B	ARGLU1
ARID5B	ARHGAP1
ARIH1	ARHGAP25
ARL4C	ARHGAP30
ARL6IP5	ARHGAP35
ARL6IP6	ARHGAP45
ARL8A	ARHGAP5
ARL8B	ARHGAP9
ARMC6	ARHGDIA
ARMT1	ARHGEF18
ARNTL	ARHGEF2
ARPC1B	ARHGEF3
ARPC2	ARHGEF6
ARPC3	ARHGEF7
ARPC5	ARID1A
ARPP19	ARID2
ARRB2	ARID4A
ARRDC3	ARID4B
ASAP1	ARID5B
ASF1B	ARIH1
ASH1L	ARL4C
ASTE1	ARL6IP5
ASXL1	ARL8B
ASXL2	ARMC6
ATF2	ARNT
ATF7IP	ARNTL
ATF7IP2	ARPC2
ATG3	ARPC3
ATG4C	ARPC5
ATM	ARPP19
ATP11B	ARRB1
ATP13A3	ARRB2
ATP1A1	ARRDC3
ATP2A2	ASAP1
ATP2A3	ASB7
ATP2B1	ASF1B
ATP2B4	ASH1L
ATP2C1	ASTE1
ATP5F1A	ASXL1
ATP5F1B	ASXL2
ATP5F1E	ATAD1
ATP5MC2	ATF1
ATP5MC3	ATF2
ATP6AP2	ATF6B
ATP6V0E1	ATF7IP
ATP6V1A	ATF7IP2
ATP6V1G1	ATG2A
ATP8B2	ATG4C
ATRX	ATL2
ATXN1	ATL3
ATXN2	ATM
ATXN2L	ATMIN
ATXN3	ATP11A
ATXN7L3	ATP11B
ATXN7L3B	ATP13A3
AUTS2	ATP2A2
AVL9	ATP2B1
AXIN1	ATP2B4
AXIN2	ATP2C1
AZIN1	ATP5F1A
B2M	ATP5MC2
B3GNT2	ATP5MC3
B4GALT1	ATP6V0D1
B4GALT5	ATP6V0E1
BAG5	ATP6V0E2
BAHD1	ATP6V1A
BAX	ATP6V1B2
BAZ1A	ATP6V1G1
BAZ1B	ATP6V1H
BAZ2A	ATP8A1
BAZ2B	ATP8B2
BBC3	ATRN
BBX	ATRX
BCL10	ATXN1
BCL11B	ATXN2
BCL2	ATXN2L
BCL2L11	ATXN3
BCL9L	ATXN7
BCOR	ATXN7L3
BDP1	ATXN7L3B
BET1	AVL9
BFAR	AXIN1
BHLHE40	AXIN2
BICDL1	AZIN1
BICRA	B2M
BICRAL	B3GNT2
BIRC2	B4GALT1
BIRC3	B4GALT3
BIRC5	B4GALT5
BLCAP	BACH1
BLM	BACH2
BMF	BAG4
BMI1	BAHD1
BMP2K	BAP1
BMPR1A	BARD1
BMT2	BAX
BNIP2	BAZ1A
BNIP3L	BAZ1B
BOD1L1	BAZ2A
BORA	BAZ2B
BPNT1	BBC3
BPNT2	BBX
BPTF	BCL10
BRD1	BCL11B
BRD2	BCL2
BRD4	BCL2L11
BRD8	BCL3
BRK1	BCL7B
BRPF1	BCL9L
BRWD1	BCLAF1
BRWD3	BDP1
BTAF1	BET1
BTBD1	BFAR
BTBD19	BHLHE40
BTF3	BICDL1
BTF3L4	BICRAL
BTG1	BIRC2
BTG2	BLCAP
BTN3A1	BLM
BTN3A2	BLMH
BUB1	BLOC1S4
BUB3	BMF
C12orf29	BMI1
C14orf28	BMT2
C16orf72	BNIP3
C18orf21	BNIP3L
C18orf25	BOD1L1
C19orf12	BPNT1
C1D	BPTF
C1GALT1	BRAF
C1QBP	BRD1
C1orf131	BRD2
C1orf174	BRD4
C1orf43	BRD7
C1orf52	BRI3
C2CD2L	BRIX1
C2CD5	BRPF3
C2orf49	BRWD1
C2orf68	BRWD3
C5orf24	BTAF1
C5orf51	BTBD1
C6orf120	BTBD19
C6orf62	BTBD2
C6orf89	BTF3L4
C7orf26	BTG1
C9orf40	BTG2
CAB39	BTLA
CABLES2	BTN3A1
CALM1	BTN3A2
CALM3	BTN3A3
CALR	BUB3
CAMK2D	BZW1
CAMK4	C11orf21
CAMKK2	C12orf75
CAMTA2	C16orf72
CAND1	C18orf21
CANT1	C18orf25
CANX	C19orf12
CAP1	C1D
CAPRIN1	C1GALT1
CAPZA1	C1orf131
CAPZA2	C1orf174
CAPZB	C1orf35
CARD8	C21orf91
CARMIL1	C2CD5
CARMIL2	C2orf49
CARS2	C2orf68
CASC3	C4orf3
CASD1	C4orf46
CASP2	C5orf51
CASP3	C6orf120
CASP8	C6orf62
CAST	C6orf89
CAT	C9orf78
CBFB	CAAP1
CBL	CAB39
CBLB	CALCOCO2
CBLL1	CALM1
CBX1	CALM3
CBX3	CALR
CBX4	CALU
CBX5	CAMK1D
CCDC117	CAMK2D
CCDC12	CAMK4
CCDC186	CAMKK2
CCDC59	CAMTA2
CCDC82	CAND1
CCDC88A	CANT1
CCDC88C	CANX
CCDC93	CAP1
CCDC97	CAPN1
CCL4	CAPN15
CCNA2	CAPRIN1
CCNB1	CAPZA1
CCNC	CAPZA2
CCND3	CAPZB
CCNE2	CARD8
CCNG2	CARNMT1
CCNH	CARS2
CCNI	CASC3
CCNK	CASD1
CCNL2	CASP2
CCNT2	CASP8
CCR4	CAST
CCR7	CAT
CCT2	CBFB
CCT8	CBL
CD164	CBLL1
CD2	CBR4
CD226	CBX1
CD247	CBX3
CD28	CBX4
CD2AP	CBX5
CD37	CBX7
CD3E	CCAR2
CD3G	CCDC107
CD4	CCDC115
CD40LG	CCDC117
CD44	CCDC12
CD46	CCDC186
CD47	CCDC28A
CD48	CCDC59
CD5	CCDC69
CD52	CCDC71L
CD53	CCDC82
CD58	CCDC88C
CD6	CCDC9
CD69	CCDC93
CD74	CCDC97
CD81	CCL3
CDC14A	CCL4
CDC25B	CCL4L2
CDC40	CCL5
CDC42EP3	CCNA2
CDC42SE1	CCND3
CDC42SE2	CCNDBP1
CDC73	CCNE2
CDCA3	CCNG1
CDCA7	CCNG2
CDCA8	CCNI
CDK1	CCNK
CDK12	CCNL2
CDK17	CCNT1
CDK2AP2	CCNT2
CDKN1B	CCNY
CDON	CCR2
CDR2	CCR4
CDS2	CCR5
CDV3	CCR7
CELF1	CCT2
CELF2	CCT4
CEMIP2	CCT8
CENPA	CD164
CENPB	CD226
CENPC	CD247
CENPK	CD28
CENPM	CD2AP
CENPQ	CD37
CEP128	CD38
CEP19	CD3D
CEP350	CD3G
CEP41	CD44
CEP43	CD46
CEP57	CD47
CEP70	CD5
CEP85L	CD52
CERS2	CD53
CFL1	CD55
CGGBP1	CD58
CHAMP1	CD6
CHCHD2	CD69
CHD1	CD7
CHD2	CD74
CHMP5	CD81
CHMP7	CD86
CHST11	CD8A
CHTOP	CD8B
CIAO2B	CDC14A
CISH	CDC25B
CITED2	CDC40
CKAP2	CDC42EP3
CKAP2L	CDC42SE1
CKAP5	CDC42SE2
CKS2	CDC73
CLCN3	CDCA8
CLDND1	CDK1
CLEC2D	CDK12
CLINT1	CDK17
CLK1	CDK2AP2
CLK2	CDKN1B
CLK4	CDKN2D
CLNS1A	CDON
CLPX	CDS2
CLSTN1	CDV3
CLSTN3	CDYL2
CLTA	CEBPB
CLTC	CELF1
CMC1	CELF2
CMIP	CEMIP2
CMPK1	CENPB
CMTM3	CENPC
CMTM6	CENPF
CMTM8	CENPK
CNBP	CEP126
CNEP1R1	CEP41
CNIH1	CEP57
CNN2	CEP76
CNNM3	CEP85L
CNOT2	CEP97
CNOT3	CERS2
CNOT6L	CERT1
CNOT8	CFAP97
CNOT9	CFLAR
CNST	CGGBP1
COG2	CHAMP1
COIL	CHCHD2
COMMD2	CHD2
COP1	CHD3
COPB2	CHD8
COPG1	CHD9
COPS2	CHMP1A
COPS8	CHMP4B
COPZ1	CHMP7
COTL1	CHP1
COX19	CHST12
COX7A2	CHTOP
COX7C	CIAO2A
CPD	CIAO2B
CPNE1	CIC
CPNE3	CISH
CPSF6	CKAP2L
CPSF7	CKAP5
CREB1	CKS2
CREBBP	CLASP1
CREBRF	CLCN3
CREBZF	CLDND1
CRKL	CLEC16A
CRLF3	CLEC2B
CRTAP	CLEC2D
CRTC3	CLINT1
CRYZ	CLIP1
CSDE1	CLK1
CSK	CLK2
CSNK1E	CLK4
CSNK2A1	CLNS1A
CSTB	CLPX
CSTF1	CLSTN1
CSTF2T	CLSTN3
CSTF3	CLTC
CTBP1	CMC1
CTC1	CMIP
CTDNEP1	CMPK1
CTDSP1	CMTM3
CTDSP2	CMTM6
CTDSPL2	CMTM8
CTLA4	CMTR1
CTNNB1	CNBP
CTPS1	CNEP1R1
CTR9	CNIH1
CTSO	CNN2
CUL2	CNNM3
CUL3	CNOT1
CUL4A	CNOT2
CUL4B	CNOT3
CUL5	CNOT6L
CUTA	CNOT8
CWC15	CNOT9
CWC25	CNPPD1
CXCR4	COG2
CXCR5	COG3
CXCR6	COIL
CYB5B	COMMD2
CYLD	COP1
CYP1B1	COPA
CYRIB	COPB1
CYTH1	COPE
CYTIP	COPS2
DAZAP1	COPS8
DAZAP2	COPZ1
DBR1	COQ10B
DCAF12	COTL1
DCAF5	COX19
DCAKD	COX4I1
DCBLD1	COX7A2L
DCK	CPEB4
DCP2	CPNE1
DCTN3	CPNE3
DCTN4	CPSF6
DCTN5	CPSF7
DCUN1D1	CPT1A
DDB1	CRACR2A
DDHD1	CREB1
DDIT4	CREB3L2
DDX1	CREBBP
DDX17	CREBRF
DDX18	CREBZF
DDX21	CRKL
DDX23	CRLF3
DDX27	CRTAP
DDX3X	CRY1
DDX46	CRY2
DDX5	CRYBG1
DDX6	CRYZ
DEK	CS
DENND4B	CSDE1
DENND4C	CSK
DENND5A	CSNK1A1
DENND6A	CSNK1D
DESI2	CSNK1G1
DGCR2	CSNK2A1
DGKA	CSRP1
DGKE	CST7
DHX15	CSTF1
DHX37	CSTF2T
DHX57	CTBP1
DIAPH1	CTC1
DIDO1	CTCF
DIP2B	CTDP1
DIPK2A	CTDSP1
DIS3	CTDSP2
DKC1	CTDSPL2
DLAT	CTLA4
DLD	CTPS1
DLG1	CTR9
DLGAP5	CTSC
DLST	CTSO
DNAJA1	CUL2
DNAJB1	CUL3
DNAJB14	CUL4A
DNAJB9	CUL4B
DNAJC16	CUTA
DNAJC3	CWC22
DNAJC5	CWC25
DNAJC7	CXCR3
DNAJC8	CXCR6
DNMT1	CYB5B
DOCK10	CYFIP2
DOCK2	CYLD
DOCK8	CYP20A1
DOCK9	CYRIB
DPP4	CYTH1
DPP8	CYTH4
DPY19L1	CYTIP
DPY19L4	DAP3
DPYSL2	DAZAP2
DR1	DCAF12
DSCC1	DCAF4
DUSP16	DCAF5
DUSP6	DCAKD
DUSP7	DCK
DUT	DCP2
DYNC1H1	DCTN3
DYNC1LI2	DCTN4
DYNLL1	DCTN5
DYNLL2	DCUN1D1
DYRK1A	DCUN1D4
DYRK2	DCUN1D5
E2F2	DDB1
E2F3	DDHD1
E2F4	DDIT4
EAPP	DDX17
ECT2	DDX18
EDEM1	DDX21
EDEM3	DDX23
EEA1	DDX27
EEF1A1	DDX3X
EEF1B2	DDX5
EEF2	DDX6
EFCAB14	DEK
EFHD2	DENND4B
EFNA3	DENND4C
EFR3A	DENND5A
EGR1	DERL1
EHD4	DESI2
EI24	DGCR2
EIF1	DGKA
EIF1AD	DGKD
EIF1AX	DHRS3
EIF1B	DHX15
EIF2AK1	DHX36
EIF2AK3	DHX37
EIF2S3	DHX57
EIF3A	DIAPH1
EIF3B	DICER1
EIF3E	DIDO1
EIF3F	DIP2A
EIF3G	DIP2B
EIF3J	DIPK2A
EIF3M	DKC1
EIF4A1	DLAT
EIF4A2	DLD
EIF4B	DLG1
EIF4EBP2	DLGAP4
EIF4ENIF1	DLST
EIF4G1	DMBX1
EIF4G2	DMTN
EIF4H	DMXL1
EIF5	DNAAF2
EIF5A	DNAJA2
EIF5B	DNAJB1
ELF1	DNAJB14
ELF2	DNAJB6
ELK1	DNAJB9
ELK4	DNAJC16
ELMO1	DNAJC3
ELOA	DNAJC8
ELOVL5	DNM2
EMB	DNMT3A
EML4	DOCK10
ENPP4	DOCK11
EP300	DOCK8
EPB41	DOCK9
EPC1	DPEP2
EPC2	DPP4
ERAP1	DPP8
ERCC1	DPY19L1
ERCC8	DPYSL2
ERG28	DR1
ERGIC1	DSCC1
ERGIC2	DSTN
ERH	DUSP16
ERICH1	DUSP22
ERLEC1	DUSP5
ERMP1	DUSP6
ERN1	DUSP7
ERO1A	DYNC1H1
ESCO1	DYNC1LI2
ESYT1	DYNC2I1
ESYT2	DYNLL1
ETAA1	DYNLL2
ETF1	DYRK1A
ETNK1	DYRK2
ETS1	E2F3
ETS2	EAF1
ETV3	ECT2
EVA1C	EDEM1
EVI2B	EDEM3
EVL	EEA1
EXOC5	EEF1A1
EZR	EEF1B2
FADD	EEF2
FAM102A	EFCAB14
FAM104A	EFHD2
FAM107B	EFNA3
FAM117A	EFR3A
FAM117B	EGR1
FAM120A	EGR3
FAM120C	EHD1
FAM126A	EHD4
FAM126B	EI24
FAM169A	EID1
FAM177A1	EIF1
FAM193A	EIF1AD
FAM219A	EIF1AX
FAM43A	EIF2A
FAM76A	EIF2AK1
FAM76B	EIF3A
FAM78A	EIF3B
FAM8A1	EIF3E
FAM91A1	EIF3F
FAM98B	EIF3J
FANCL	EIF3M
FARSA	EIF4A1
FASTKD3	EIF4A2
FAU	EIF4A3
FBRS	EIF4B
FBXL20	EIF4E
FBXL3	EIF4EBP2
FBXO11	EIF4ENIF1
FBXO33	EIF4G1
FBXO34	EIF4G2
FBXO45	EIF4H
FBXO5	EIF5
FBXO7	EIF5A
FBXW11	EIF5AL1
FBXW7	EIF5B
FCF1	ELF1
FCHSD2	ELF2
FCMR	ELF4
FDFT1	ELK1
FDXR	ELK4
FECH	ELMO1
FEM1C	ELMO2
FGD3	ELOA
FGFR1OP2	ELOF1
FHIP2A	ELOVL5
FKBP5	ELP1
FLI1	ELP2
FLNA	EMB
FLOT2	EMC10
FMNL1	EML4
FMR1	ENSA
FNBP1	EOMES
FNBP4	EP300
FOSL2	EPB41
FOXJ3	EPC1
FOXN2	EPC2
FOXN3	EPHA1
FOXO1	EPS15
FOXO3	ERAP1
FOXP1	ERAP2
FRAT2	ERBIN
FRMD6	ERCC1
FRMD8	ERCC3
FRYL	ERCC6L2
FTH1	ERCC8
FTL	ERG28
FUBP1	ERGIC1
FURIN	ERGIC2
FUS	ERH
FUT10	ERICH1
FYB1	ERLEC1
FYN	ERMP1
G3BP1	ERN1
G3BP2	ERO1A
GABARAPL2	ESCO1
GABPA	ESRRA
GALNT3	ESYT1
GALNT7	ESYT2
GAN	ETF1
GANAB	ETNK1
GAPDH	ETS1
GAR1	ETS2
GART	ETV3
GATA3	EVA1C
GATAD2B	EXOC8
GATC	EZR
GBP4	F2R
GBP5	FADD
GCC2	FADS2
GCH1	FAM102A
GCLC	FAM102B
GCN1	FAM104A
GDI2	FAM107B
GFM1	FAM117A
GGA2	FAM117B
GGA3	FAM120A
GID4	FAM120AOS
GIGYF2	FAM120C
GIMAP4	FAM126A
GIMAP6	FAM126B
GIMAP7	FAM133B
GIT2	FAM169A
GLB1	FAM174A
GLCCI1	FAM199X
GLG1	FAM219A
GLIPR1	FAM76A
GLOD4	FAM78A
GLRX3	FAM91A1
GLS	FAM98B
GLUD1	FANCF
GMEB2	FANCL
GMFB	FANCM
GMFG	FAR1
GMNN	FARSA
GNA12	FAS
GNA13	FASTKD3
GNAQ	FAU
GNAS	FBLN5
GNB1	FBXL16
GNG2	FBXL20
GNG5	FBXL3
GNPTAB	FBXO11
GOLGA4	FBXO21
GOLM2	FBXO3
GOLPH3	FBXO32
GOLPH3L	FBXO33
GOLT1B	FBXO38
GOSR1	FBXO7
GPATCH11	FBXW11
GPBP1L1	FBXW7
GPCPD1	FCHSD2
GPR15	FCMR
GPR171	FDFT1
GPR174	FDXR
GPR183	FECH
GPRIN3	FEM1B
GPSM3	FEM1C
GRAMD2B	FGD3
GRB2	FGFR1OP2
GRK2	FHIP2A
GRK3	FIS1
GRK6	FLI1
GRPEL2	FLNA
GRSF1	FLOT2
GSK3B	FMNL1
GSKIP	FNBP1
GSPT1	FNBP4
GSPT2	FOSL2
GTF2A1	FOXJ2
GTF2A2	FOXJ3
GTF3C2	FOXK1
GTPBP4	FOXN2
GTPBP8	FOXN3
H1-10	FOXO1
H1-3	FOXP1
H1-4	FRAT1
H1-5	FRMD8
H2AC13	FRYL
H2AC14	FTH1
H2AC4	FUBP1
H2AC6	FUBP3
H2AC8	FURIN
H2AZ1	FUS
H2AZ2	FUT10
H2BC11	FXYD5
H2BC12	FYB1
H2BC13	FYN
H2BC14	FYTTD1
H2BC21	G3BP1
H2BC3	G3BP2
H2BC4	GABARAPL2
H2BC5	GABPA
H2BC7	GABPB1
H2BC8	GALNT1
H3-3B	GALNT3
H3C10	GALNT7
H3C11	GAN
H3C12	GANAB
H3C2	GAPVD1
H3C8	GAR1
H4C11	GART
H4C12	GATA3
H4C13	GATAD2B
H4C2	GBP4
H4C4	GBP5
H4C5	GCC1
H4C6	GCC2
H4C8	GCH1
H4C9	GCLC
HADHB	GDI2
HAT1	GFM1
HBS1L	GGA2
HCFC1	GGA3
HDAC1	GID4
HDAC2	GID8
HDAC4	GIGYF2
HDAC7	GIMAP4
HEATR1	GIMAP6
HECA	GIMAP7
HECTD1	GIT1
HEG1	GLB1
HELLS	GLCCI1
HELZ	GLE1
HERC3	GLG1
HERPUD1	GLIPR1
HES1	GLIPR2
HEXIM1	GLOD4
HIBADH	GLRX3
HIF1A	GLS
HILPDA	GLUD1
HINT1	GLUL
HIPK1	GLYR1
HIPK2	GMCL1
HIVEP2	GMFB
HLA-A	GNA13
HLA-B	GNAI2
HLA-C	GNAI3
HLA-DRA	GNAQ
HLA-E	GNAS
HMG20A	GNB1
HMGA1	GNB5
HMGB1	GNE
HMGB2	GNG2
HMGCR	GNG5
HMGN2	GNLY
HMGXB3	GNPTAB
HMGXB4	GNS
HMMR	GOLGA2
HNRNPA0	GOLGA4
HNRNPA1	GOLGA7
HNRNPA2B1	GOLGA7B
HNRNPA3	GOLGB1
HNRNPAB	GOLM2
HNRNPC	GOLPH3
HNRNPD	GORASP2
HNRNPDL	GOSR1
HNRNPF	GPATCH8
HNRNPH1	GPBP1L1
HNRNPK	GPCPD1
HNRNPR	GPD1L
HNRNPU	GPR107
HNRNPUL1	GPR132
HOMEZ	GPR15
HP1BP3	GPR155
HPS3	GPR174
HS3ST3B1	GPR183
HSP90AA1	GPRIN3
HSP90AB1	GPSM3
HSP90B1	GRAP2
HSPA13	GRB2
HSPA1A	GRK3
HSPA5	GRK5
HSPA8	GRK6
HSPA9	GRSF1
HSPH1	GRWD1
HYOU1	GSE1
IBTK	GSK3B
ICE1	GSKIP
ICOS	GSPT1
ID2	GSTK1
ID3	GTF2A1
IDI1	GTF2A2
IER2	GTF2B
IER3	GTF3C2
IER5	GTF3C4
IFFO2	GTPBP2
IFI16	GTPBP4
IFNGR1	GTPBP8
IFT46	GUCD1
IGF1R	GYG1
IGF2R	GZMB
IGIP	GZMK
IKZF1	H2AC6
IKZF3	H2AX
IL10	H2AZ1
IL16	H3-3B
IL2	H3C8
IL2RB	HADHB
IL32	HAPLN3
IL6ST	HAT1
IL7R	HBP1
ILF2	HBS1L
ILF3	HCCS
IMMT	HCFC1
INCENP	HDAC1
ING1	HDAC2
ING4	HDAC4
INPP4A	HDAC7
INPP4B	HECA
INSIG1	HECTD1
INSIG2	HECTD4
INTS3	HELLS
INTS6	HELZ
IPO5	HERC1
IPO7	HERC4
IQGAP1	HERPUD1
IRAG2	HES5
IREB2	HEXIM1
IRF1	HGSNAT
IRF2	HIBADH
IRF2BP2	HIC1
IRF2BPL	HINT1
IRF4	HIPK1
ISCA1	HIPK2
ISCA2	HIPK3
ISCU	HIVEP2
IST1	HK2
ITCH	HLA-A
ITFG1	HLA-B
ITGA4	HLA-C
ITGAL	HLA-DMB
ITGAV	HLA-DQA1
ITGB1	HLA-DQB1
ITGB1BP1	HLA-DRB1
ITK	HLA-E
ITM2A	HMGA1
ITM2B	HMGB1
ITPA	HMGB2
ITPKB	HMGB3
ITPR1	HMGCR
ITPRID2	HMGCS1
IVNS1ABP	HMGN2
JADE1	HMGXB3
JADE2	HMGXB4
JAK1	HMMR
JAML	HNRNPA0
JARID2	HNRNPA1
JKAMP	HNRNPA2B1
JMJD1C	HNRNPA3
JUNB	HNRNPC
JUND	HNRNPD
KANSL1	HNRNPF
KAT2B	HNRNPH1
KAT6A	HNRNPH2
KAT6B	HNRNPH3
KATNBL1	HNRNPK
KBTBD6	HNRNPM
KCNA3	HNRNPR
KCNAB2	HNRNPU
KCTD10	HNRNPUL1
KCTD20	HOMEZ
KCTD21	HOPX
KCTD6	HP1BP3
KDELR1	HS3ST3B1
KDM4C	HSBP1
KDM5A	HSD17B11
KDM5B	HSP90AA1
KDM5C	HSP90B1
KDM6A	HSPA5
KDM7A	HSPA8
KDSR	HSPD1
KEAP1	HSPH1
KHDRBS1	HVCN1
KHSRP	HYOU1
KIAA0232	IAH1
KIAA1109	IBTK
KIAA1143	ICE1
KIAA1586	ICOS
KIAA2026	ID1
KIF11	ID3
KIF21A	IDE
KIF21B	IDH2
KIF5B	IDI1
KIN	IER2
KLF12	IER3
KLF13	IER5
KLF2	IER5L
KLF3	IFFO2
KLF6	IFI16
KLF7	IFIT5
KLF9	IFNGR1
KLHDC2	IFT46
KLHL20	IGF2R
KLHL21	IGSF9B
KLHL24	IK
KLHL6	IKBKE
KMT2A	IKZF1
KMT2C	IKZF2
KMT2E	IKZF3
KMT5B	IL10RA
KPNA1	IL16
KPNA2	IL17RA
KPNA3	IL2RB
KPNA4	IL32
KPNA6	IL6ST
KPNB1	IL7R
KRAS	ILF2
KRR1	ILF3
KTN1	ILRUN
L3MBTL3	IMMT
LACTB2	IMP3
LAMTOR1	INCENP
LAMTOR3	ING1
LAMTOR5	INO80D
LAPTM5	INPP4A
LARP1	INPP4B
LARP4B	INPP5B
LARP7	INPP5D
LASP1	INPP5K
LAT	INSIG1
LBH	INSIG2
LBR	INTS11
LCLAT1	INTS2
LCOR	INTS3
LCP1	IP6K2
LDHA	IPCEF1
LDLR	IPO5
LDLRAD4	IPO7
LDLRAP1	IQGAP1
LEAP2	IQSEC1
LEF1	IRAG2
LEMD3	IRF1
LENG8	IRF2
LEPROTL1	IRF2BP2
LFNG	IRF2BPL
LIMS1	IRF4
LIN54	IRS2
LIN7C	ISCA1
LITAF	ISCU
LIX1L	ISG20
LMBRD1	IST1
LMNB1	ITCH
LNPEP	ITFG1
LPAR5	ITGA1
LPAR6	ITGA4
LPCAT3	ITGAL
LPIN1	ITGAM
LPIN2	ITGAV
LPXN	ITGAX
LRATD2	ITGB1
LRBA	ITGB2
LRCH1	ITK
LRCH3	ITM2A
LRIG1	ITM2B
LRIG2	ITM2C
LRR1	ITPA
LRRC41	ITPKB
LRRC58	ITPR1
LRRC59	ITPR2
LRRC8A	ITPRID2
LRRN3	ITSN2
LSM14A	IVNS1ABP
LSM2	JADE2
LSM5	JAGN1
LSM6	JAK1
LSM8	JAK2
LSP1	JAK3
LTB	JAKMIP2
LTN1	JARID2
LUC7L2	JKAMP
LUC7L3	JMJD1C
LUZP1	JPT2
LYPLA1	JUN
LYRM7	KANSL1
LYSMD3	KAT2B
LYST	KAT6A
M6PR	KAT6B
MACF1	KAT7
MACIR	KATNBL1
MACROH2A1	KBTBD2
MAD2L1	KBTBD6
MAD2L1BP	KCNA3
MAF	KCTD10
MAFK	KCTD20
MAIP1	KCTD21
MAK16	KCTD6
MALT1	KDELR1
MAML2	KDM2A
MAN1A1	KDM2B
MAN1C1	KDM3A
MAN2A1	KDM4B
MANEA	KDM4C
MAP2K1	KDM5A
MAP3K1	KDM5B
MAP3K4	KDM6A
MAP3K5	KDM6B
MAP3K8	KDM7A
MAP4K4	KDSR
MAP4K5	KEAP1
MAP7D1	KHDRBS1
MAPK1	KHSRP
MAPK14	KIAA0232
MAPRE2	KIAA1109
MARCHF6	KIAA1143
MARF1	KIAA1191
MARK2	KIAA1671
MAST4	KIAA2026
MAT2A	KIF11
MAT2B	KIF14
MAX	KIF18B
MAZ	KIF20B
MB21D2	KIF21A
MBD1	KIF21B
MBIP	KIF3A
MBNL1	KIF5B
MBP	KLF10
MCCC2	KLF12
MCL1	KLF13
MCM3	KLF2
MCMBP	KLF3
MCUB	KLF6
MDFIC	KLF7
MDH2	KLF9
MDM2	KLHDC2
MEAF6	KLHL21
MECP2	KLHL24
MED1	KLHL28
MED13	KLHL6
MED21	KLRD1
MED23	KMT2A
MED28	KMT2B
MED29	KMT2C
MED4	KMT2E
MED9	KMT5B
MEGF9	KNL1
METAP1	KPNA2
METTL13	KPNA3
METTL14	KPNA4
METTL16	KPNA6
METTL17	KPNB1
METTL2B	KRAS
METTL8	KRBOX5
METTL9	KTN1
MEX3B	LACTB2
MFAP1	LAIR1
MFHAS1	LAMP2
MFN1	LAMTOR1
MFSD1	LAMTOR3
MFSD14B	LAP3
MFSD6	LAPTM5
MGAT1	LARP1
MGAT3	LARP4B
MGAT4A	LARP7
MGAT5	LASP1
MIA2	LAT
MIA3	LBH
MIB1	LBR
MICB	LCLAT1
MIDEAS	LCOR
MIDN	LCP1
MIEF1	LDHA
MIER1	LDLR
MIER3	LDLRAD4
MIGA2	LDLRAP1
MINDY2	LEF1
MIS12	LEMD3
MKLN1	LENG8
MKNK1	LEPROTL1
MKNK2	LFNG
MKRN2	LIG3
MLEC	LIMD1
MLLT10	LIMS1
MLLT6	LIN54
MMADHC	LIN7C
MMD	LITAF
MMUT	LIX1L
MOB1A	LMAN1
MOB3A	LMAN2
MON1B	LMBRD1
MORC3	LMNB1
MORF4L1	LMTK2
MORF4L2	LNPEP
MPHOSPH10	LNPK
MPHOSPH6	LONP2
MPHOSPH8	LPAR5
MPHOSPH9	LPCAT3
MPRIP	LPGAT1
MRI1	LPIN1
MRPL10	LPIN2
MRPL13	LPXN
MRPL3	LRBA
MRPL33	LRCH1
MRPL34	LRCH3
MRPL36	LRIG1
MRPL50	LRR1
MRPS14	LRRC58
MRPS27	LRRC59
MRTFA	LRRC8A
MSI2	LRRFIP1
MSL2	LRRN3
MSL3	LSM12
MSN	LSM14A
MT1X	LSM14B
MT2A	LSM2
MTA2	LSM4
MTDH	LSM5
MTHFD2	LSM6
MTM1	LSM8
MTMR14	LSP1
MTMR3	LTB
MTO1	LUC7L2
MTPN	LUC7L3
MTR	LUZP1
MTRR	LYRM7
MXI1	LYST
MYADM	MACF1
MYB	MACIR
MYC	MACROH2A1
MYCBP2	MADD
MYH9	MAEA
MYL12A	MAF
MYL12B	MAFK
MYL6	MAIP1
MYO18A	MAK16
MYSM1	MALT1
MZT1	MAML1
N4BP1	MAML2
N4BP2L1	MAMLD1
N4BP2L2	MAN1C1
NAA16	MANEA
NAA35	MANF
NAA50	MAP2K1
NAB1	MAP3K1
NABP1	MAP3K2
NACA	MAP3K3
NAP1L1	MAP3K4
NAP1L4	MAP3K5
NAPA	MAP3K8
NARS1	MAP4
NBEAL1	MAP4K4
NCAPD2	MAP4K5
NCAPG2	MAP7D1
NCBP1	MAPK1
NCK2	MAPK1IP1L
NCL	MAPKAPK2
NCOA1	MAPRE1
NCOA2	MAPRE2
NCOA3	MARCHF6
NCOA4	MARCKSL1
NCOA7	MARF1
NCOR1	MARK2
NCSTN	MAST3
NDFIP1	MAST4
NDUFA10	MAT2A
NDUFA4	MAT2B
NDUFA5	MAVS
NDUFB1	MAX
NDUFB6	MAZ
NDUFS2	MB21D2
NDUFV2	MBD5
NECAP2	MBD6
NEDD1	MBNL1
NEK1	MBP
NEK7	MBTD1
NELFA	MCCC2
NEMF	MCL1
NEMP1	MCM3
NEMP2	MCMBP
NET1	MCTP2
NF1	MDFIC
NF2	MDH2
NFAT5	MDM1
NFATC2	MDM2
NFATC3	MDN1
NFE2L2	ME2
NFKB1	MECP2
NFKBIA	MED1
NFKBID	MED13
NFKBIZ	MED13L
NFYA	MED21
NFYB	MED23
NHLRC2	MED28
NIN	MED29
NIP7	MED31
NIPA1	MED4
NIPBL	MED6
NKTR	MED8
NLK	MED9
NLRC5	MEF2D
NNT	METAP1
NOG	METTL14
NOL11	METTL17
NOL8	METTL2B
NOLC1	METTL8
NONO	MFAP1
NOP10	MFF
NOTCH1	MFN1
NPAT	MFSD1
NPEPPS	MFSD14B
NPM1	MFSD6
NPTN	MGA
NR2C2	MGAT1
NR3C1	MGAT3
NRAS	MGAT4A
NRDE2	MGAT5
NRF1	MIA2
NSD3	MIB1
NSF	MIDEAS
NSMAF	MIDN
NSMCE2	MIER1
NT5C3A	MIER3
NUBP2	MIGA2
NUCKS1	MINDY2
NUDT21	MINK1
NUDT4	MIS12
NUFIP1	MIS18BP1
NUFIP2	MKLN1
NUMA1	MKNK1
NUP153	MKNK2
NUP160	MKRN1
NUP205	MKRN2
NUP210	MLEC
NUP35	MLF2
NUP50	MLLT6
NUP54	MLX
NXF1	MMADHC
OAS2	MMUT
OAT	MNT
OBI1	MOAP1
OCIAD1	MOB1A
ODF2	MOB3A
ODF2L	MORC3
OGA	MORF4L2
OGFOD1	MOSMO
OGFRL1	MPHOSPH6
OGT	MPHOSPH8
OLA1	MPHOSPH9
OPTN	MPRIP
ORC2	MRE11
ORC4	MRFAP1
ORMDL1	MRFAP1L1
ORMDL3	MRPL10
OSBP	MRPL11
OSBPL3	MRPL13
OSBPL8	MRPL16
OST4	MRPL34
OSTC	MRPL35
OSTF1	MRPL36
OTUD1	MRPL44
OTULIN	MRPL50
OTULINL	MRPS14
P2RY10	MRPS21
PABIR2	MRPS23
PABPC1	MRPS6
PABPC4	MRTFA
PACS1	MSH2
PAFAH1B1	MSI2
PAFAH1B2	MSL1
PAG1	MSL2
PAIP2	MSL3
PAK1IP1	MSN
PAK2	MT2A
PALM2AKAP2	MTA2
PALS1	MTDH
PALS2	MTF2
PANK3	MTM1
PAPOLA	MTMR12
PAPOLG	MTMR14
PARK7	MTMR3
PARP1	MTMR6
PARP11	MTO1
PARP8	MTPN
PAXBP1	MTR
PAXIP1	MTSS2
PBX2	MXD1
PCBP1	MXD4
PCBP2	MXI1
PCCA	MYADM
PCF11	MYB
PCIF1	MYCBP
PCMT1	MYCBP2
PCMTD1	MYD88
PCMTD2	MYH9
PCNA	MYL12A
PCNX1	MYL12B
PCNX4	MYO1G
PCSK7	MYSM1
PDCD10	N4BP1
PDCD11	N4BP2L1
PDCD4	N4BP2L2
PDCD6IP	NAA30
PDCD7	NAA35
PDCL	NAA50
PDE3B	NAB1
PDE4B	NABP1
PDE4D	NACC1
PDE7A	NADK
PDE8A	NAP1L1
PDIA4	NAP1L4
PDIA6	NAPA
PDK1	NARS1
PDS5A	NATD1
PDS5B	NBEAL1
PDXK	NBR1
PEX11B	NCAPD2
PEX12	NCKAP1L
PEX2	NCL
PEX6	NCOA2
PFAS	NCOA3
PFKFB3	NCOA4
PFN1	NCOA7
PGAM1	NCOR1
PGK1	NCOR2
PGPEP1	NCSTN
PGRMC2	NDEL1
PHACTR4	NDFIP1
PHAF1	NDRG1
PHB2	NDRG3
PHC3	NDUFA10
PHF10	NDUFA5
PHF12	NDUFB6
PHF13	NDUFS1
PHF14	NDUFS2
PHF19	NDUFV3
PHF2	NECAP2
PHF20	NEDD1
PHF5A	NEK7
PHF8	NEK9
PHLPP1	NELFCD
PI4K2A	NELL2
PIAS1	NEMF
PIAS3	NEMP1
PICALM	NET1
PIK3C2B	NF1
PIK3CB	NF2
PIK3IP1	NFAT5
PIK3R1	NFATC1
PIKFYVE	NFATC2
PIM1	NFATC3
PIM2	NFE2L2
PIP4K2A	NFIC
PIP4K2B	NFKBIA
PIP5K1A	NFKBID
PISD	NFKBIE
PITPNB	NFKBIZ
PJA2	NFYA
PKD2	NFYB
PKN2	NGDN
PKNOX1	NGLY1
PLAC8	NHSL2
PLAGL2	NIN
PLCL2	NINJ1
PLEC	NIP7
PLIN2	NIPA1
PLK4	NIPBL
PNISR	NKG7
PNN	NKTR
PNRC1	NLRC5
PNRC2	NOB1
POGK	NOL10
POLA1	NOL4L
POLB	NOL8
POLD3	NONO
POLE3	NOP10
POLG	NOTCH1
POLR1C	NOTCH2
POLR2B	NPM1
POLR3E	NR1D2
POLR3GL	NR2C2
POM121	NR3C1
POM121C	NRAS
POMGNT1	NRBP1
POMGNT2	NRCAM
POMK	NRDE2
POU2AF1	NRIP1
POU2F1	NSD1
POU2F2	NSD3
PPA1	NSMAF
PPARD	NSMCE2
PPFIA1	NSMCE4A
PPIA	NSUN2
PPID	NT5C3A
PPIG	NUBP2
PPIH	NUCB1
PPIL4	NUCKS1
PPIP5K2	NUDCD1
PPM1K	NUDT21
PPP1CA	NUDT3
PPP1CC	NUFIP2
PPP1R10	NUP133
PPP1R12A	NUP153
PPP1R15B	NUP155
PPP1R18	NUP210
PPP1R21	NUP35
PPP1R8	NUP50
PPP1R9B	NUP54
PPP2R1A	NUP98
PPP2R2A	NVL
PPP2R5C	NXF1
PPP2R5E	OAS2
PPP4R2	OAZ2
PPP4R3A	OCIAD1
PPP4R3B	OGA
PPP6C	OGDH
PPP6R3	OGFOD1
PPTC7	OGFRL1
PRAG1	OGT
PRDM1	OPA1
PRDM10	OPTN
PRDM2	ORAI1
PRDM8	ORC2
PRDX1	ORMDL1
PRDX3	ORMDL3
PRELID3B	OSBP
PREP	OSBPL3
PREPL	OSBPL8
PREX1	OSBPL9
PRKAA1	OSTF1
PRKACA	OTUD1
PRKACB	OTUD4
PRKAR1A	OTULIN
PRKCA	P2RY10
PRKCB	P4HB
PRKDC	PABPC1
PRKRA	PACS1
PRKX	PAFAH1B1
PRMT3	PAFAH1B2
PRNP	PAG1
PROK2	PAIP1
PRPF38B	PAIP2
PRPF40A	PAK2
PRPF4B	PALM2AKAP2
PRPF8	PALS1
PRPS1	PANK2
PRPS2	PANK3
PRR12	PAPOLA
PRR3	PAPOLG
PRRC1	PARG
PRRC2B	PARP1
PRRC2C	PARP11
PSAT1	PARP14
PSD4	PARP8
PSMA3	PASK
PSMA7	PATL1
PSMB4	PAXBP1
PSMB5	PAXIP1
PSMC2	PBRM1
PSMC6	PBX2
PSMD11	PCBP1
PSMD12	PCBP2
PSMD2	PCCA
PSME3	PCED1B
PSME4	PCF11
PSMF1	PCID2
PSMG2	PCIF1
PSMG4	PCMTD1
PTAR1	PCMTD2
PTBP1	PCNP
PTBP3	PCNX1
PTCH2	PCNX4
PTGER4	PDCD10
PTGES3	PDCD11
PTK2B	PDCD4
PTMA	PDCD6IP
PTP4A2	PDCD7
PTPN1	PDCL
PTPN11	PDE3B
PTPN23	PDE4A
PTPN4	PDE4B
PTPN6	PDE4D
PTPRA	PDE4DIP
PTPRC	PDE7A
PTPRE	PDE7B
PTPRJ	PDHA1
PUM1	PDIA4
PUM2	PDIA6
PURA	PDK1
PURB	PDK2
PUS10	PDP1
PUS7	PDP2
PWWP2A	PDPK1
PYGO2	PDPR
QKI	PDS5A
QSOX1	PDS5B
R3HDM4	PDXDC1
RAB10	PDXK
RAB11A	PEAK1
RAB11B	PEX6
RAB14	PFDN2
RAB18	PFKFB3
RAB1A	PFKP
RAB21	PGAM1
RAB27A	PGBD4
RAB28	PGK1
RAB2A	PGPEP1
RAB2B	PGRMC2
RAB3GAP2	PHACTR4
RAB5B	PHB2
RAB6A	PHC2
RAB7A	PHC3
RAB8A	PHF10
RAB8B	PHF12
RABEP1	PHF13
RABGGTB	PHF14
RAC2	PHF19
RACGAP1	PHF2
RACK1	PHF20
RAD1	PHF23
RAD18	PHF3
RAD21	PHF5A
RAD23B	PHF6
RALGDS	PHF8
RAN	PHLDA1
RANBP1	PHTF1
RANBP2	PHYKPL
RANBP3	PI4K2A
RANBP9	PIAS1
RAP1A	PIAS3
RAP1B	PICALM
RAP2B	PIH1D1
RAP2C	PIK3C2B
RAPGEF1	PIK3CA
RAPGEF2	PIK3CB
RAPGEF6	PIK3CD
RARA	PIK3CG
RARS1	PIK3IP1
RARS2	PIK3R1
RASA2	PIKFYVE
RASGRP1	PIM1
RASGRP2	PIM2
RASSF3	PIM3
RASSF5	PIP4K2A
RB1	PIP4K2B
RBBP4	PIP4K2C
RBBP5	PIP4P1
RBBP6	PIP5K1A
RBBP7	PIP5K1C
RBBP8	PITPNB
RBL1	PITPNM2
RBL2	PJA2
RBM17	PKD2
RBM23	PKM
RBM25	PKN2
RBM26	PKNOX1
RBM3	PLAAT3
RBM33	PLAC8
RBM39	PLAGL2
RBM5	PLCG1
RBMX	PLCL2
RBPJ	PLEC
RBX1	PLEK
RC3H1	PLEKHA2
RC3H2	PLEKHA3
RCL1	PLEKHA5
RCOR1	PLEKHM2
RCOR3	PLIN2
RCSD1	PLK1
REL	PLRG1
RER1	PLSCR1
RERE	PNISR
RESF1	PNN
REST	PNRC1
RETREG1	PNRC2
RETREG2	POGK
RETREG3	POLB
RFC1	POLD3
RFC5	POLE3
RFFL	POLG
RFLNB	POLR2B
RFWD3	POLR2C
RFX3	POLR2K
RFX7	POLR2M
RFXAP	POM121
RGCC	POM121C
RGL1	POMGNT1
RHEB	POMGNT2
RHOA	POMK
RHOF	POMP
RHOH	POR
RHOU	POU2F2
RIC1	PPA1
RICTOR	PPARGC1B
RIF1	PPAT
RILPL2	PPFIA1
RIOK2	PPID
RIPOR2	PPIG
RLIM	PPIL4
RNASEL	PPM1A
RNF10	PPM1K
RNF125	PPP1CB
RNF13	PPP1CC
RNF138	PPP1R10
RNF139	PPP1R12A
RNF144A	PPP1R15B
RNF145	PPP1R16B
RNF149	PPP1R18
RNF168	PPP1R2
RNF185	PPP1R8
RNF187	PPP1R9B
RNF19A	PPP2R5A
RNF2	PPP2R5C
RNF213	PPP2R5E
RNF216	PPP4C
RNF220	PPP4R1
RNF227	PPP4R2
RNF38	PPP4R3A
RNF41	PPP4R3B
RNF44	PPP5C
RNGTT	PPP6C
RNMT	PPP6R1
RNPS1	PPP6R3
RO60	PPTC7
ROCK1	PRCP
ROCK2	PRDM1
RORA	PRDM2
RPA1	PRDX3
RPA3	PRDX6
RPIA	PRELID1
RPL11	PRELID3B
RPL13	PREP
RPL13A	PREPL
RPL14	PREX1
RPL15	PRF1
RPL18	PRKAA1
RPL19	PRKAB2
RPL21	PRKACA
RPL22L1	PRKACB
RPL23	PRKAR1A
RPL24	PRKCA
RPL27	PRKCE
RPL27A	PRKRA
RPL28	PRKX
RPL29	PRMT6
RPL30	PRPF38B
RPL31	PRPF39
RPL32	PRPF40A
RPL35	PRPF4B
RPL35A	PRPS1
RPL36	PRR12
RPL36AL	PRR3
RPL37A	PRRC1
RPL38	PRRC2A
RPL39	PRRC2B
RPL41	PRRC2C
RPL5	PSAP
RPL7L1	PSD4
RPL8	PSEN1
RPL9	PSIP1
RPLP0	PSKH1
RPN1	PSMA3
RPN2	PSMA4
RPRD1B	PSMA5
RPS11	PSMA7
RPS14	PSMB5
RPS15	PSMB8
RPS15A	PSMC6
RPS16	PSMD1
RPS19	PSMD11
RPS2	PSMD12
RPS20	PSMD5
RPS21	PSME3
RPS23	PSME3IP1
RPS24	PSME4
RPS25	PSMF1
RPS27	PSMG2
RPS28	PTAR1
RPS29	PTBP1
RPS3	PTBP3
RPS3A	PTCD3
RPS4X	PTCH2
RPS6	PTEN
RPS6KA3	PTGER2
RPS9	PTGES3
RRAGC	PTK2B
RRAS2	PTMA
RREB1	PTMS
RRM2	PTP4A2
RSBN1	PTPN1
RSBN1L	PTPN11
RSF1	PTPN23
RSRP1	PTPN4
RSU1	PTPN6
RTF1	PTPRA
RTKN2	PTPRC
RTN4	PTPRE
RUNX1	PTPRJ
RUNX3	PUM1
RWDD1	PUM2
RYBP	PURA
S100A10	PURB
S100A11	PUS7
S100A4	PUS7L
S1PR1	PWWP2A
SACM1L	PXMP4
SAMD1	PXN
SAMHD1	PYGO2
SAMSN1	QKI
SAR1A	QRICH1
SARAF	QSOX1
SART3	R3HDM4
SASH3	RAB11A
SAT1	RAB11FIP1
SBF1	RAB11FIP4
SBNO1	RAB12
SC5D	RAB14
SCAF11	RAB18
SCAMP1	RAB1A
SCAMP2	RAB1B
SCD	RAB21
SCP2	RAB22A
SDAD1	RAB27A
SDCBP	RAB29
SDHC	RAB2A
SEC11A	RAB2B
SEC14L1	RAB35
SEC22A	RAB37
SEC24B	RAB3GAP2
SEC24C	RAB5A
SEC62	RAB5B
SECISBP2L	RAB6A
SEH1L	RAB7A
SEL1L	RAB8A
SELENOF	RAB8B
SELL	RABEP1
SEMA4B	RABGGTB
SEMA4D	RAC2
SENP1	RACGAP1
SENP6	RACK1
SENP7	RAD1
SEPHS1	RAD21
SEPTIN2	RAD23B
SEPTIN6	RAF1
SEPTIN7	RAI1
SEPTIN9	RALGAPB
SERF2	RALGDS
SERINC1	RALY
SERINC3	RAN
SERINC5	RANBP1
SERPINB1	RANBP3
SERPINB9	RANGAP1
SERTAD3	RAP1A
SESN1	RAP1B
SESN3	RAP2A
SET	RAP2B
SETD1A	RAP2C
SETD1B	RAPGEF1
SETD2	RAPGEF2
SETD3	RAPGEF6
SETDB2	RARA
SF1	RARG
SF3B1	RARS1
SF3B2	RASA2
SF3B3	RASA3
SFMBT2	RASGRP1
SFPQ	RASGRP2
SFSWAP	RASSF1
SFT2D1	RASSF3
SFT2D2	RASSF5
SFXN1	RBBP4
SGK1	RBBP5
SH2B1	RBBP6
SH2B3	RBL1
SH2D3C	RBL2
SH3BGRL3	RBM17
SH3BP5	RBM23
SH3GLB1	RBM25
SHISA5	RBM26
SHKBP1	RBM28
SHOC2	RBM3
SHPRH	RBM33
SHQ1	RBM38
SIK3	RBM39
SIKE1	RBMS1
SIN3A	RBMX
SINHCAF	RBPJ
SIRT1	RBX1
SKI	RC3H1
SKP1	RC3H2
SLA	RCAN3
SLAMF1	RCC2
SLAMF6	RCL1
SLBP	RCOR1
SLC11A2	RCOR3
SLC12A6	RCSD1
SLC15A4	REL
SLC16A1	RELA
SLC20A1	RELL1
SLC23A2	RER1
SLC25A12	RERE
SLC25A15	RESF1
SLC25A24	REST
SLC25A25	RETREG1
SLC25A3	RETREG3
SLC25A30	REV3L
SLC25A33	RFC1
SLC25A36	RFC5
SLC25A40	RFLNB
SLC25A5	RFWD3
SLC27A4	RFX3
SLC29A1	RFX7
SLC2A1	RFXAP
SLC30A5	RGCC
SLC35A2	RGP1
SLC35B3	RGS1
SLC38A1	RGS14
SLC38A10	RGS19
SLC38A2	RHOA
SLC39A10	RHOF
SLC39A14	RHOH
SLC41A1	RHOT1
SLC44A2	RIC1
SLC46A3	RIF1
SLC4A7	RILPL2
SLC66A3	RIN3
SLC6A6	RIOK2
SLC7A1	RIPOR2
SLC7A6	RLIM
SLC9A3R1	RMI2
SLF2	RMND5A
SLFN5	RNF10
SLK	RNF114
SLTM	RNF125
SMAD2	RNF138
SMAD3	RNF139
SMAD4	RNF144A
SMAD7	RNF145
SMAP2	RNF149
SMARCA2	RNF167
SMARCA5	RNF168
SMARCAD1	RNF185
SMARCC2	RNF187
SMC1A	RNF2
SMC2	RNF213
SMC3	RNF216
SMC4	RNF220
SMC6	RNF34
SMCHD1	RNF38
SMG1	RNF40
SMNDC1	RNF44
SMU1	RNMT
SNAPIN	RNPC3
SNIP1	RNPS1
SNRK	RO60
SNRNP40	ROCK1
SNRPB	RORA
SNRPB2	RPA1
SNRPG	RPA2
SNU13	RPA3
SNX1	RPL11
SNX12	RPL13
SNX13	RPL13A
[truncated: 836 more rows]
