# Supplementary material for: ROQUIN-1 binding to the transcriptome of T cells reveals conserved targets in the control of lymphopoiesis
Source: Research Square preprint supplement (doi:10.21203/rs.3.rs-6931797/v1), 2025-07-15
Supplement: Supplementary file 6 [file e3935d460411f1b43d1001dd.xlsx]

## Sheet: Sheet 1
Table 1
Organism	Cell line	# batches	# WT replicates (used)	# DKO replicates (used)	# Input replicates (used)	# PureCLIP sites	# binding sites (unfilt.)	# binding sites (DKOfilt)	#genes	#3’utr genes
Human	CD4	2	4	N/A	4	677,781 (batch2)	33,492	N/A	2969	2480
Human	CD8	1	2	N/A	0	28,139	11,798	N/A	3689	2835
Mouse	CD4; TH1	2	6	3	2	1,195,881 (batch1)	3.007	19,759	2136	1718
Mouse	CD8	2 (1 from Subsets, 1 full set)	2	0	0	417,469	105,150	N/A	7051	5676
Mouse	CD4; TH17	1	1	N/A	0	442,338	133,995	N/A	6372	4919
Mouse	CD4; TH0	1	1	N/A	0	96,552	32,263	N/A	4143	3160
Mouse	CD4; TReg	1	1	N/A	0	47,658	13,773	N/A	3.077	1914
Mouse	B cells	1	1	0	N/A	85,043	30,165	11,783	4337	3564
Mouse	MEF cells	1	1	1	0	46,525	13,532	6,132	3044	2153
