# Supplementary figures and images for: ROQUIN-1 binding to the transcriptome of T cells reveals conserved targets in the control of lymphopoiesis
Source: Research Square preprint supplement (doi:10.21203/rs.3.rs-6931797/v1), 2025-07-15

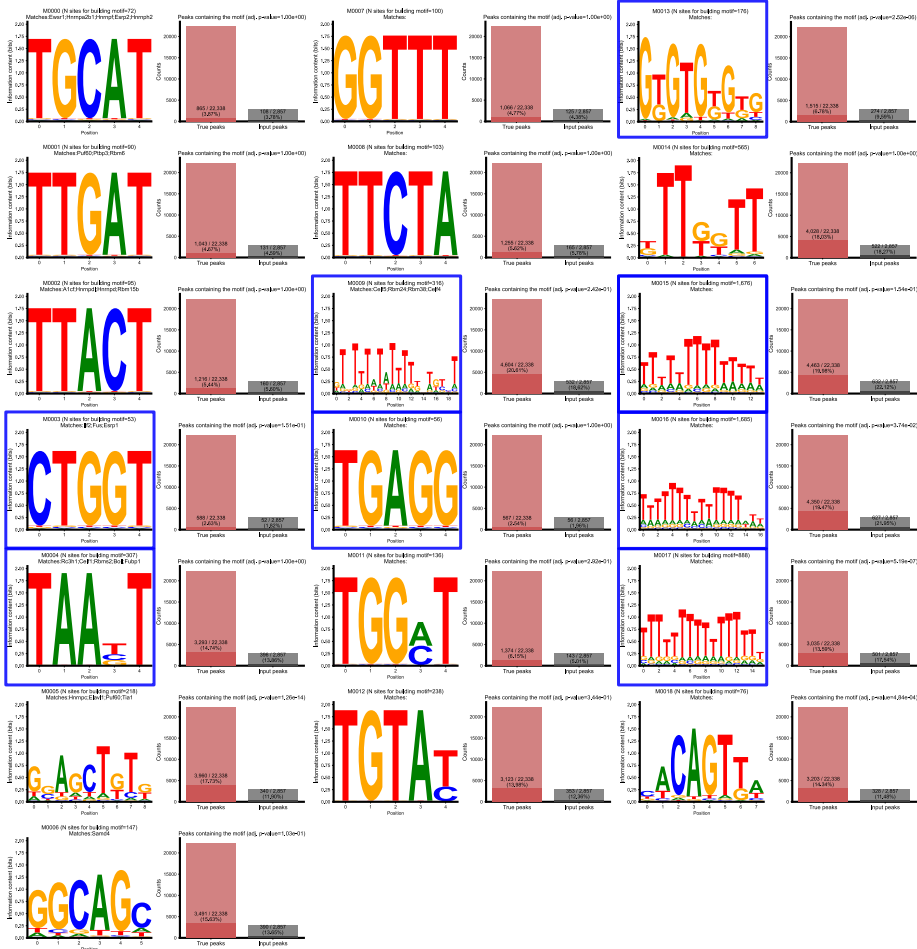

Supplement: Supplementary file 1 [file 6d3abff08ef9d211689863dd.pdf]
